# Supplementary material for: Comparative transcriptome analysis reveals potentially novel roles of Homeobox genes in adipose deposition in fat-tailed sheep
Source: Sci Rep. 2017 Nov 3;7:14491. doi: 10.1038/s41598-017-14967-9 (PMC5670210; doi:10.1038/s41598-017-14967-9)
Supplement: Supplementary file 2 — Dataset 1 [file 41598_2017_14967_MOESM2_ESM.xlsx]

## Sheet: Supplementary Table S1
Supplementary Table S1. Statistics for gene numbers and percentage within different gene expression level intervals.
FPKM interval	SAT1	SAT2	SAT3	VAT1	VAT2	VAT3	TAT1	TAT2	TAT3
0~1	15582(52.56%)	15653(52.80%)	16741(56.47%)	15211(51.31%)	15670(52.86%)	15564(52.50%)	15790(53.27%)	16543(55.81%)	17010(57.38%)
1~3	2974(10.03%)	2827(9.54%)	2819(9.51%)	3173(10.70%)	2987(10.08%)	3190(10.76%)	3351(11.30%)	3184(10.74%)	3265(11.01%)
3~15	5545(18.71%)	5670(19.13%)	5075(17.12%)	5712(19.27%)	5630(18.99%)	5621(18.96%)	5157(17.40%)	5185(17.49%)	4813(16.24%)
15~60	3643(12.29%)	3645(12.30%)	3167(10.68%)	3616(12.20%)	3524(11.89%)	3365(11.35%)	3345(11.28%)	3007(10.14%)	2829(9.54%)
>60	1900(6.41%)	1849(6.24%)	1842(6.21%)	1932(6.52%)	1833(6.18%)	1904(6.42%)	2001(6.75%)	1725(5.82%)	1727(5.83%)
