# Supplementary material for: Comparative transcriptome analysis reveals potentially novel roles of Homeobox genes in adipose deposition in fat-tailed sheep
Source: Sci Rep. 2017 Nov 3;7:14491. doi: 10.1038/s41598-017-14967-9 (PMC5670210; doi:10.1038/s41598-017-14967-9)
Supplement: Supplementary file 3 — Dataset 2 [file 41598_2017_14967_MOESM3_ESM.xlsx]

## Sheet: SATvs.VAT 
Supplementary Table S2 Genes that differentially expressed in the comparisons of SAT vs. VAT, SAT vs. TAT and VAT vs. TAT.
Gene_ID	FPKM_SAT	FPKM_VAT	ReadCount_SAT	ReadCount_VAT	Log2FoldChange	p-value	FDR	Gene_Symbol	Description
ENSOARG00000000033	1744.73	710.314	19002.8	7563.28	1.3291	0.00011917	0.017176	ND6	NADH-ubiquinone oxidoreductase chain 6 [Source:UniProtKB/Swiss-Prot;Acc:O78757]
ENSOARG00000000042	0	2.02267	0	152.984	#NAME?	6.8116e-05	0.012032	CYP2E1	cytochrome P450, family 2, subfamily E, polypeptide 1 [Source:HGNC Symbol;Acc:HGNC:2631]
ENSOARG00000000123	5.94876	22.9223	203.71	731.001	-1.8434	4.6217e-07	0.00021715	CX3CL1	chemokine (C-X3-C motif) ligand 1 [Source:HGNC Symbol;Acc:HGNC:10647]
ENSOARG00000000429	0.777819	3.80374	27.1451	128.148	-2.239	1.4713e-06	0.00066668	MROH6	maestro heat-like repeat family member 6 [Source:HGNC Symbol;Acc:HGNC:27814]
ENSOARG00000000705	0.45485	2.31025	8.7891	43.0744	-2.293	0.00016622	0.022704	-	Uncharacterized protein [Source:UniProtKB/TrEMBL;Acc:W5NRD6]
ENSOARG00000000971	12.7123	34.5241	1627.29	4366.12	-1.4239	7.4964e-05	0.012646	ANKRD12	ankyrin repeat domain 12 [Source:HGNC Symbol;Acc:HGNC:29135]
ENSOARG00000000994	0.0259621	0.805913	1.59171	48.6339	-4.9333	3.0459e-10	3.9754e-07	PLA2G5	phospholipase A2, group V [Source:HGNC Symbol;Acc:HGNC:9038]
ENSOARG00000001158	3.06193	14.9647	49.9129	233.525	-2.2261	3.4545e-05	0.0074317	LAT	linker for activation of T cells [Source:HGNC Symbol;Acc:HGNC:18874]
ENSOARG00000001202	12.782	48.6626	538.437	1928.78	-1.8408	2.3698e-07	0.00012653	PLK3	polo-like kinase 3 [Source:HGNC Symbol;Acc:HGNC:2154]
ENSOARG00000001465	0.802156	2.9439	18.5921	68.4832	-1.8811	0.00027733	0.034112	-	Uncharacterized protein [Source:UniProtKB/TrEMBL;Acc:W5NTM9]
ENSOARG00000001589	1.86994	8.22801	39.6397	169.794	-2.0988	6.6786e-05	0.011977	-	Uncharacterized protein [Source:UniProtKB/TrEMBL;Acc:W5NU18]
ENSOARG00000001672	0.645169	3.84531	21.6499	128.402	-2.5682	6.927e-05	0.012133	-	Uncharacterized protein [Source:UniProtKB/TrEMBL;Acc:W5NUA7]
ENSOARG00000001680	26.2975	76.8483	767.479	2077.42	-1.4366	3.4127e-05	0.0074237	SFRP2	secreted frizzled-related protein 2 [Source:HGNC Symbol;Acc:HGNC:10777]
ENSOARG00000001701	16.7495	50.5404	369.839	1092.04	-1.5621	2.112e-05	0.0052784	-	Uncharacterized protein [Source:UniProtKB/TrEMBL;Acc:W5NUE9]
ENSOARG00000001862	1.99181	0.637651	136.741	41.5029	1.7202	0.00027558	0.034075	PITPNM3	PITPNM family member 3 [Source:HGNC Symbol;Acc:HGNC:21043]
ENSOARG00000001964	0.43094	1.39322	49.2045	153.658	-1.6429	0.0001062	0.016201	NUP210	nucleoporin 210kDa [Source:HGNC Symbol;Acc:HGNC:30052]
ENSOARG00000002108	1.95205	6.06429	55.9874	165.083	-1.56	0.00016286	0.022442	-	Uncharacterized protein [Source:UniProtKB/TrEMBL;Acc:W5NVM4]
ENSOARG00000002307	1.38783	18.739	22.7926	291.086	-3.6748	0.00020084	0.026213	DLK1	delta-like 1 homolog (Drosophila) [Source:HGNC Symbol;Acc:HGNC:2907]
ENSOARG00000002316	0.366673	1.64148	10.5284	44.1261	-2.0673	0.00036988	0.041776	-	Uncharacterized protein [Source:UniProtKB/TrEMBL;Acc:W5NWA6]
ENSOARG00000002450	0.231816	1.27038	6.23839	34.0626	-2.4489	0.0004745	0.049535	-	Uncharacterized protein [Source:UniProtKB/TrEMBL;Acc:W5NWQ3]
ENSOARG00000002613	7.7111	1.42918	153.358	27.3218	2.4888	3.5281e-08	2.5117e-05	SHOX2	short stature homeobox 2 [Source:HGNC Symbol;Acc:HGNC:10854]
ENSOARG00000002632	0.300602	6.61487	11.1049	234.165	-4.3983	9.5928e-08	5.7578e-05	-	Uncharacterized protein [Source:UniProtKB/TrEMBL;Acc:W5NX98]
ENSOARG00000002740	10.9276	28.0364	330.863	827.92	-1.3233	0.00045643	0.048151	HSF4	heat shock transcription factor 4 [Source:HGNC Symbol;Acc:HGNC:5227]
ENSOARG00000002790	3.30705	15.7385	275.026	1267.68	-2.2046	5.9773e-09	5.4549e-06	SLIT3	slit guidance ligand 3 [Source:HGNC Symbol;Acc:HGNC:11087]
ENSOARG00000002808	0.231155	0.973209	18.0373	74.7308	-2.0507	7.3792e-05	0.012587	-	Protein Wnt [Source:UniProtKB/TrEMBL;Acc:W5NXT3]
ENSOARG00000002811	26.4302	81.2082	862.148	2589.1	-1.5864	1.3158e-05	0.0036801	CCNL1	cyclin L1 [Source:HGNC Symbol;Acc:HGNC:20569]
ENSOARG00000002970	2.09575	6.99012	63.5882	199.394	-1.6488	3.1643e-05	0.0070131	-	Uncharacterized protein [Source:UniProtKB/TrEMBL;Acc:W5NYB0]
ENSOARG00000003099	0.527894	2.26434	58.3725	242.179	-2.0527	2.0781e-06	0.00087181	RASAL3	RAS protein activator like 3 [Source:HGNC Symbol;Acc:HGNC:26129]
ENSOARG00000003349	0.689486	2.96459	19.1551	76.2512	-1.993	3.9179e-05	0.0080178	-	Uncharacterized protein [Source:UniProtKB/TrEMBL;Acc:W5NZH2]
ENSOARG00000003437	0.620503	0.053026	48.4907	4.18141	3.5356	0.00034882	0.039781	PITX2	paired-like homeodomain 2 [Source:HGNC Symbol;Acc:HGNC:9005]
ENSOARG00000003586	1.82746	6.41445	68.251	226.23	-1.7289	1.3344e-05	0.0036881	IGF2	insulin-like growth factor 2 [Source:HGNC Symbol;Acc:HGNC:5466]
ENSOARG00000003620	1.18661	5.63115	116.679	525.816	-2.172	0.00045706	0.048151	KCP	kielin/chordin-like protein [Source:HGNC Symbol;Acc:HGNC:17585]
ENSOARG00000003707	0.738922	2.42309	33.63	104.47	-1.6353	0.00026107	0.032525	-	Uncharacterized protein [Source:UniProtKB/TrEMBL;Acc:W5P0K9]
ENSOARG00000003963	303.834	978.031	7184.44	21710.3	-1.5954	4.1772e-06	0.0015577	DUSP1	dual specificity phosphatase 1 [Source:HGNC Symbol;Acc:HGNC:3064]
ENSOARG00000004356	1.77076	4.93174	132.744	355.747	-1.4222	0.00018872	0.024768	CARD11	caspase recruitment domain family, member 11 [Source:HGNC Symbol;Acc:HGNC:16393]
ENSOARG00000004499	0.176363	1.76157	16.7426	162.18	-3.276	3.9723e-07	0.00019442	DLX5	distal-less homeobox 5 [Source:HGNC Symbol;Acc:HGNC:2918]
ENSOARG00000004787	0.431228	2.45726	36.7206	209.896	-2.515	5.0679e-06	0.0017062	SLIT2	slit guidance ligand 2 [Source:HGNC Symbol;Acc:HGNC:11086]
ENSOARG00000004802	3.29776	11.2646	24.6267	79.9214	-1.6984	0.00031071	0.036866	-	Uncharacterized protein [Source:UniProtKB/TrEMBL;Acc:W5P3Z3]
ENSOARG00000004809	22.6891	3.00989	340.683	41.6656	3.0315	9.4722e-05	0.014935	-	Uncharacterized protein [Source:UniProtKB/TrEMBL;Acc:W5P401]
ENSOARG00000004964	5.12943	26.6956	30.8457	149.184	-2.2739	8.067e-06	0.0024297	CCL5	chemokine (C-C motif) ligand 5 [Source:HGNC Symbol;Acc:HGNC:10632]
ENSOARG00000005151	0.356473	1.90245	126.763	661.255	-2.3831	1.4234e-09	1.6407e-06	HMCN1	hemicentin 1 [Source:HGNC Symbol;Acc:HGNC:19194]
ENSOARG00000005164	4.42206	16.0132	21.9451	76.0844	-1.7937	0.00022153	0.028754	HCST	hematopoietic cell signal transducer [Source:HGNC Symbol;Acc:HGNC:16977]
ENSOARG00000005515	11.5092	4.11862	622.56	212.07	1.5537	4.0827e-05	0.0082684	PDPR	pyruvate dehydrogenase phosphatase regulatory subunit [Source:HGNC Symbol;Acc:HGNC:30264]
ENSOARG00000005579	0.65499	2.14636	31.6743	99.9411	-1.6578	0.00032163	0.037781	SEMA4A	sema domain, immunoglobulin domain (Ig), transmembrane domain (TM) and short cytoplasmic domain, (semaphorin) 4A [Source:HGNC Symbol;Acc:HGNC:10729]
ENSOARG00000005599	1.32089	5.66453	74.3098	304.867	-2.0366	4.481e-06	0.001595	DENND1C	DENN/MADD domain containing 1C [Source:HGNC Symbol;Acc:HGNC:26225]
ENSOARG00000005711	0.171913	1.3415	7.02375	53.5392	-2.9303	1.717e-06	0.00074697	COL13A1	collagen, type XIII, alpha 1 [Source:HGNC Symbol;Acc:HGNC:2190]
ENSOARG00000005770	23.1919	8.74155	2581.05	943.624	1.4517	3.5128e-05	0.0074317	KIF1B	kinesin family member 1B [Source:HGNC Symbol;Acc:HGNC:16636]
ENSOARG00000005846	1.24062	4.25731	55.8646	186.52	-1.7393	3.0207e-05	0.0068235	TMC8	transmembrane channel-like 8 [Source:HGNC Symbol;Acc:HGNC:20474]
ENSOARG00000005916	15.3247	41.6692	479.347	1218.74	-1.3462	9.9545e-05	0.015386	CHRNE	cholinergic receptor, nicotinic, epsilon (muscle) [Source:HGNC Symbol;Acc:HGNC:1966]
ENSOARG00000006063	404.231	101.653	2416.06	592.515	2.0277	1.9436e-08	1.5745e-05	EIF4EBP2	eukaryotic translation initiation factor 4E binding protein 2 [Source:HGNC Symbol;Acc:HGNC:3289]
ENSOARG00000006073	4.33543	0.0604005	98.5468	1.32887	6.2125	8.6009e-19	4.0412e-15	MAB21L1	mab-21-like 1 (C. elegans) [Source:HGNC Symbol;Acc:HGNC:6757]
ENSOARG00000006135	2.55291	8.27538	59.9153	185.452	-1.6301	7.3936e-05	0.012587	SEPT1	septin 1 [Source:HGNC Symbol;Acc:HGNC:2879]
ENSOARG00000006139	2.56436	11.815	88.3835	390.658	-2.1441	2.8633e-08	2.1021e-05	PRF1	perforin 1 (pore forming protein) [Source:HGNC Symbol;Acc:HGNC:9360]
ENSOARG00000006374	3.32836	14.7309	49.3313	207.645	-2.0735	3.6564e-05	0.0076019	-	Uncharacterized protein [Source:UniProtKB/TrEMBL;Acc:W5P8R9]
ENSOARG00000006400	0.827752	4.0102	22.2233	101.333	-2.189	2.2269e-06	0.00091129	SH2D2A	SH2 domain containing 2A [Source:HGNC Symbol;Acc:HGNC:10821]
ENSOARG00000006591	0.852803	2.61675	39.7955	117.682	-1.5642	0.0004334	0.046706	ARHGAP9	Rho GTPase activating protein 9 [Source:HGNC Symbol;Acc:HGNC:14130]
ENSOARG00000006817	29.3589	10.0702	690.264	229.674	1.5876	1.5355e-05	0.0041465	-	Uncharacterized protein [Source:UniProtKB/TrEMBL;Acc:W5PA44]
ENSOARG00000006908	1.96858	8.16058	26.3616	107.341	-2.0257	2.0494e-05	0.0051769	HOXB7	homeobox B7 [Source:HGNC Symbol;Acc:HGNC:5118]
ENSOARG00000007493	60.7524	20.9255	2141.25	694.268	1.6249	1.2011e-05	0.0034413	DHCR24	24-dehydrocholesterol reductase [Source:HGNC Symbol;Acc:HGNC:2859]
ENSOARG00000007533	2.56972	0.428013	247.835	39.3916	2.6534	0.00028584	0.034937	ADCYAP1R1	adenylate cyclase activating polypeptide 1 (pituitary) receptor type I [Source:HGNC Symbol;Acc:HGNC:242]
ENSOARG00000007840	11.9275	55.1154	409.126	1815.26	-2.1496	7.7996e-09	6.5441e-06	BHLHE40	basic helix-loop-helix family, member e40 [Source:HGNC Symbol;Acc:HGNC:1046]
ENSOARG00000008114	12.7456	5.2854	405.113	163.541	1.3087	0.00045088	0.04793	GPR107	G protein-coupled receptor 107 [Source:HGNC Symbol;Acc:HGNC:17830]
ENSOARG00000008127	10.5438	29.537	191.614	511.679	-1.417	0.00011863	0.017176	DEDD2	death effector domain containing 2 [Source:HGNC Symbol;Acc:HGNC:24450]
ENSOARG00000008332	0.941187	3.49757	15.7349	57.898	-1.8795	0.00047652	0.049535	CD27	CD27 molecule [Source:HGNC Symbol;Acc:HGNC:11922]
ENSOARG00000008341	336.852	107.757	2705.8	839.375	1.6887	1.8738e-06	0.00080038	MTURN	maturin, neural progenitor differentiation regulator homolog (Xenopus) [Source:HGNC Symbol;Acc:HGNC:25457]
ENSOARG00000008454	1.28615	3.44567	123.859	326.076	-1.3965	0.0003331	0.038361	-	Uncharacterized protein [Source:UniProtKB/TrEMBL;Acc:W5PF54]
ENSOARG00000008507	2.69066	8.03432	114.954	326.578	-1.5064	6.5669e-05	0.011867	ALPL	alkaline phosphatase, liver/bone/kidney [Source:HGNC Symbol;Acc:HGNC:438]
ENSOARG00000008703	1.60068	6.46645	33.7873	130.145	-1.9456	8.8198e-06	0.0025581	GZMM	granzyme M (lymphocyte met-ase 1) [Source:HGNC Symbol;Acc:HGNC:4712]
ENSOARG00000008861	0.174111	1.24823	3.48769	25.3683	-2.8627	0.00042755	0.046288	SLAMF6	SLAM family member 6 [Source:HGNC Symbol;Acc:HGNC:21392]
ENSOARG00000008893	0.502336	2.01508	15.49	60.3083	-1.961	0.00030784	0.036711	SLAMF1	signaling lymphocytic activation molecule family member 1 [Source:HGNC Symbol;Acc:HGNC:10903]
ENSOARG00000008984	6.56205	27.971	88.7751	369.514	-2.0574	4.9517e-06	0.0017062	CD3E	CD3e molecule, epsilon (CD3-TCR complex) [Source:HGNC Symbol;Acc:HGNC:1674]
ENSOARG00000009042	1.25241	4.2839	131.146	431.498	-1.7182	5.0837e-06	0.0017062	-	Uncharacterized protein [Source:UniProtKB/TrEMBL;Acc:W5PGZ6]
ENSOARG00000009090	13.2712	2.61224	506.96	95.8539	2.403	8.2742e-08	5.2537e-05	CYP1B1	cytochrome P450, family 1, subfamily B, polypeptide 1 [Source:HGNC Symbol;Acc:HGNC:2597]
ENSOARG00000009172	3.21786	11.5067	33.744	116.872	-1.7922	7.5361e-05	0.012646	CD3D	CD3d molecule, delta (CD3-TCR complex) [Source:HGNC Symbol;Acc:HGNC:1673]
ENSOARG00000009174	0.345069	1.4361	15.1019	62.9139	-2.0586	0.00018671	0.024643	-	Uncharacterized protein [Source:UniProtKB/TrEMBL;Acc:W5PHC7]
ENSOARG00000009250	0.224634	0.922151	16.7351	64.5656	-1.9479	0.00011871	0.017176	ITGAD	integrin, alpha D [Source:HGNC Symbol;Acc:HGNC:6146]
ENSOARG00000009401	11.4325	45.9386	377.148	1384.24	-1.8759	9.5685e-08	5.7578e-05	PTGER4	prostaglandin E receptor 4 (subtype EP4) [Source:HGNC Symbol;Acc:HGNC:9596]
ENSOARG00000009551	1.69375	6.25165	87.0833	315.649	-1.8579	3.638e-06	0.0013785	FYB	FYN binding protein [Source:HGNC Symbol;Acc:HGNC:4036]
ENSOARG00000009599	9.28832	26.591	287.238	796.527	-1.4715	8.2329e-05	0.013526	ALDH1A3	aldehyde dehydrogenase 1 family, member A3 [Source:HGNC Symbol;Acc:HGNC:409]
ENSOARG00000009653	5.4035	25.6621	165.732	770.368	-2.2167	6.037e-09	5.4549e-06	RGS2	regulator of G-protein signaling 2 [Source:HGNC Symbol;Acc:HGNC:9998]
ENSOARG00000009675	0.0861703	4.45395	7.27718	381.138	-5.7108	8.1502e-29	9.5736e-25	HOXA10	homeobox A10 [Source:HGNC Symbol;Acc:HGNC:5100]
ENSOARG00000009680	0.426678	19.5475	7.04228	320.051	-5.5061	2.4777e-17	8.3154e-14	HOXA9	homeobox A9 [Source:HGNC Symbol;Acc:HGNC:5109]
ENSOARG00000009724	1.34659	6.68357	20.7135	99.6097	-2.2657	2.2498e-06	0.00091129	-	Uncharacterized protein [Source:UniProtKB/TrEMBL;Acc:W5PJ07]
ENSOARG00000009758	1.09399	12.8395	16.6324	192.106	-3.5298	1.3757e-13	2.6934e-10	HOXA6	homeobox A6 [Source:HGNC Symbol;Acc:HGNC:5107]
ENSOARG00000009791	2.81278	15.7554	48.7106	256.715	-2.3979	4.5999e-05	0.0090375	RGS1	regulator of G-protein signaling 1 [Source:HGNC Symbol;Acc:HGNC:9991]
ENSOARG00000009845	31.9428	9.33524	1965.2	556.629	1.8199	3.844e-07	0.00019214	OSMR	oncostatin M receptor [Source:HGNC Symbol;Acc:HGNC:8507]
ENSOARG00000009871	6.36109	2.51221	1268.81	486.941	1.3817	0.00011847	0.017176	-	Uncharacterized protein [Source:UniProtKB/TrEMBL;Acc:W5PJG3]
ENSOARG00000009999	261.267	1007.5	5290.21	19062.3	-1.8493	6.807e-05	0.012032	JUN	jun proto-oncogene [Source:HGNC Symbol;Acc:HGNC:6204]
ENSOARG00000010358	0.944566	4.1461	27.5285	118.918	-2.111	4.8937e-06	0.0017062	RUNX2	runt-related transcription factor 2 [Source:HGNC Symbol;Acc:HGNC:10472]
ENSOARG00000010445	3.10114	9.45903	46.185	134.132	-1.5382	0.00030071	0.036229	EBI3	Epstein-Barr virus induced 3 [Source:HGNC Symbol;Acc:HGNC:3129]
ENSOARG00000010462	7.20678	45.6989	162.398	980.26	-2.5936	9.1178e-10	1.1274e-06	CXCR4	C-X-C chemokine receptor type 4 [Source:RefSeq peptide;Acc:NP_001264097]
ENSOARG00000010493	17.2623	152.389	536.024	4450.68	-3.0537	3.4254e-16	1.0059e-12	ATF3	activating transcription factor 3 [Source:HGNC Symbol;Acc:HGNC:785]
ENSOARG00000010512	13.5875	5.22885	256.462	94.1582	1.4456	0.00032608	0.037924	SGCD	sarcoglycan, delta (35kDa dystrophin-associated glycoprotein) [Source:HGNC Symbol;Acc:HGNC:10807]
ENSOARG00000010631	2.91577	8.35283	128.196	357.683	-1.4803	0.0001099	0.016657	DOK2	docking protein 2, 56kDa [Source:HGNC Symbol;Acc:HGNC:2991]
ENSOARG00000010748	101.436	449.876	476.123	2007.42	-2.0759	8.571e-06	0.002517	C11orf96	chromosome 11 open reading frame 96 [Source:HGNC Symbol;Acc:HGNC:38675]
ENSOARG00000010939	1.11844	9.60733	44.1279	354.693	-3.0068	4.6547e-05	0.0090375	NR4A3	nuclear receptor subfamily 4, group A, member 3 [Source:HGNC Symbol;Acc:HGNC:7982]
ENSOARG00000010959	0.60383	2.70665	18.3748	78.5577	-2.096	3.543e-05	0.0074317	SCML4	sex comb on midleg-like 4 (Drosophila) [Source:HGNC Symbol;Acc:HGNC:21397]
ENSOARG00000010969	217.656	86.4353	12051.2	4666.55	1.3687	8.2329e-05	0.013526	GPAM	glycerol-3-phosphate acyltransferase, mitochondrial [Source:HGNC Symbol;Acc:HGNC:24865]
ENSOARG00000011075	0.681268	0.0209101	20.8944	0.630047	5.0515	4.3362e-06	0.0015917	SELE	E-selectin [Source:RefSeq peptide;Acc:NP_001009749]
ENSOARG00000011235	23.5595	84.419	1079.18	3588.57	-1.7335	1.6255e-06	0.00072052	-	Uncharacterized protein [Source:UniProtKB/TrEMBL;Acc:W5PNM3]
ENSOARG00000011437	1.62719	7.87462	44.386	209.387	-2.238	7.1358e-06	0.0022352	TBC1D10C	TBC1 domain family, member 10C [Source:HGNC Symbol;Acc:HGNC:24702]
ENSOARG00000011683	9.34417	2.57286	240.428	62.1368	1.9521	2.8851e-06	0.0011488	DTX4	deltex 4, E3 ubiquitin ligase [Source:HGNC Symbol;Acc:HGNC:29151]
ENSOARG00000011916	56.3668	22.8825	745.03	297.052	1.3266	0.00046365	0.048627	-	Uncharacterized protein [Source:UniProtKB/TrEMBL;Acc:W5PQP5]
ENSOARG00000011967	37.0844	92.2342	762.986	1781.65	-1.2235	0.00031554	0.037252	DBP	D site-binding protein [Source:RefSeq peptide;Acc:NP_001132921]
ENSOARG00000012074	24.949	71.8317	1496.61	4013.37	-1.4231	2.7939e-05	0.0064099	RASIP1	Ras interacting protein 1 [Source:HGNC Symbol;Acc:HGNC:24716]
ENSOARG00000012075	22.5971	7.74222	1935.03	635.08	1.6073	8.429e-06	0.0025066	CDON	cell adhesion associated, oncogene regulated [Source:HGNC Symbol;Acc:HGNC:17104]
ENSOARG00000012131	0.200091	1.07685	6.42304	33.2555	-2.3723	0.00041308	0.045349	IKZF3	IKAROS family zinc finger 3 (Aiolos) [Source:HGNC Symbol;Acc:HGNC:13178]
ENSOARG00000012145	2.92607	9.28836	103.698	321.408	-1.632	3.9248e-05	0.0080178	WAS	Wiskott-Aldrich syndrome [Source:HGNC Symbol;Acc:HGNC:12731]
ENSOARG00000012346	0.935592	3.37537	19.4202	70.2701	-1.8554	0.00040696	0.044916	ARMC12	armadillo repeat containing 12 [Source:HGNC Symbol;Acc:HGNC:21099]
ENSOARG00000012378	15.0082	5.80588	1937.38	736.489	1.3954	5.2057e-05	0.0097062	SLC4A4	solute carrier family 4 (sodium bicarbonate cotransporter), member 4 [Source:HGNC Symbol;Acc:HGNC:11030]
ENSOARG00000012452	44.279	16.1773	2342.28	816.211	1.5209	2.2346e-05	0.0055261	ADARB1	adenosine deaminase, RNA-specific, B1 [Source:HGNC Symbol;Acc:HGNC:226]
ENSOARG00000012461	19.447	58.8543	558.297	1630.23	-1.546	1.9356e-05	0.004997	FBLN5	fibulin 5 [Source:HGNC Symbol;Acc:HGNC:3602]
ENSOARG00000012805	10.9995	4.726	958.548	399.733	1.2618	0.00042099	0.045789	TMEM2	transmembrane protein 2 [Source:HGNC Symbol;Acc:HGNC:11869]
ENSOARG00000012948	2.23941	9.36505	69.0191	276.108	-2.0002	0.0003678	0.041742	FHL2	four and a half LIM domains 2 [Source:HGNC Symbol;Acc:HGNC:3703]
ENSOARG00000013062	102.204	40.8111	2554.93	988.399	1.3701	0.00010419	0.015999	SETD7	SET domain containing (lysine methyltransferase) 7 [Source:HGNC Symbol;Acc:HGNC:30412]
ENSOARG00000013187	23.1475	62.4651	982.425	2623.34	-1.417	8.8293e-05	0.014015	NEXN	nexilin (F actin binding protein) [Source:HGNC Symbol;Acc:HGNC:29557]
ENSOARG00000013482	0.160989	1.14981	11.4277	80.2307	-2.8116	9.6128e-05	0.015056	MYRF	myelin regulatory factor [Source:HGNC Symbol;Acc:HGNC:1181]
ENSOARG00000013631	1.09313	3.28053	63.6293	183.194	-1.5256	0.00017102	0.023224	FAM65C	family with sequence similarity 65, member C [Source:HGNC Symbol;Acc:HGNC:16168]
ENSOARG00000013646	1.25194	6.06925	51.7652	243.768	-2.2355	6.0496e-08	4.0607e-05	ZAP70	zeta-chain (TCR) associated protein kinase 70kDa [Source:HGNC Symbol;Acc:HGNC:12858]
ENSOARG00000013931	1.66144	7.52263	72.1082	313.231	-2.119	5.341e-05	0.0098801	SH3BP1	SH3-domain binding protein 1 [Source:HGNC Symbol;Acc:HGNC:10824]
ENSOARG00000013941	1.36035	5.5264	44.8168	169.268	-1.9172	4.4507e-06	0.001595	GATA3	GATA binding protein 3 [Source:HGNC Symbol;Acc:HGNC:4172]
ENSOARG00000014069	10.5898	32.1404	240.55	704.451	-1.5502	2.5769e-05	0.0060539	-	Uncharacterized protein [Source:UniProtKB/TrEMBL;Acc:W5PXC6]
ENSOARG00000014085	1.5526	7.22258	12.5308	56.7163	-2.1783	8.6138e-05	0.013947	SH2D1A	SH2 domain containing 1A [Source:HGNC Symbol;Acc:HGNC:10820]
ENSOARG00000014103	3.39156	16.206	90.6633	404.075	-2.156	3.2379e-05	0.0071091	NOCT	nocturnin [Source:HGNC Symbol;Acc:HGNC:14254]
ENSOARG00000014123	8.86387	151.946	250.347	4288.06	-4.0983	1.5557e-18	6.0912e-15	PI16	peptidase inhibitor 16 [Source:HGNC Symbol;Acc:HGNC:21245]
ENSOARG00000014195	2.2226	0.559017	53.0307	12.6421	2.0686	0.00023295	0.029781	TMEFF2	transmembrane protein with EGF-like and two follistatin-like domains 2 [Source:HGNC Symbol;Acc:HGNC:11867]
ENSOARG00000014525	5.7138	1.70927	692.125	201.002	1.7838	1.4756e-06	0.00066668	AR	androgen receptor [Source:HGNC Symbol;Acc:HGNC:644]
ENSOARG00000014623	0.0799062	24.4499	1.46108	390.386	-8.0617	1.4473e-07	8.0954e-05	TCF21	transcription factor 21 [Source:HGNC Symbol;Acc:HGNC:11632]
ENSOARG00000014631	1.40103	4.02538	97.5542	267.482	-1.4552	0.00017398	0.02349	JAK3	Janus kinase 3 [Source:HGNC Symbol;Acc:HGNC:6193]
ENSOARG00000015006	1.50107	4.52983	42.7648	126.071	-1.5597	0.00039288	0.043953	SASH3	SAM and SH3 domain containing 3 [Source:HGNC Symbol;Acc:HGNC:15975]
ENSOARG00000015215	0.248159	1.58676	8.55767	49.9301	-2.5446	0.00037877	0.042576	BLK	BLK proto-oncogene, Src family tyrosine kinase [Source:HGNC Symbol;Acc:HGNC:1057]
ENSOARG00000015379	0.0660609	3.56166	1.33799	70.0397	-5.71	1.2105e-14	2.8439e-11	ALX1	ALX homeobox 1 [Source:HGNC Symbol;Acc:HGNC:1494]
ENSOARG00000015701	0.147677	1.18532	5.29605	40.2731	-2.9268	6.9516e-06	0.0022069	-	Uncharacterized protein [Source:UniProtKB/TrEMBL;Acc:W5Q2B4]
ENSOARG00000015708	1.49428	0.165903	26.3541	2.77811	3.2459	6.9723e-05	0.012133	CHODL	chondrolectin [Source:HGNC Symbol;Acc:HGNC:17807]
ENSOARG00000015718	4.77955	12.4541	351.828	903.561	-1.3608	0.0002374	0.030148	PTPRC	protein tyrosine phosphatase, receptor type, C [Source:HGNC Symbol;Acc:HGNC:9666]
ENSOARG00000015723	1.5324	4.64027	93.5682	277.479	-1.5683	8.7271e-05	0.013947	PLCL1	phospholipase C-like 1 [Source:HGNC Symbol;Acc:HGNC:9063]
ENSOARG00000015970	0.902171	4.3576	16.3655	77.6813	-2.2469	1.3087e-05	0.0036801	SLA2	Src-like-adaptor 2 [Source:HGNC Symbol;Acc:HGNC:17329]
ENSOARG00000016062	1.27305	4.99575	52.0431	198.256	-1.9296	3.5682e-06	0.0013742	CD6	CD6 molecule [Source:HGNC Symbol;Acc:HGNC:1691]
ENSOARG00000016109	3.63739	10.1103	164.342	434.319	-1.4021	0.0001854	0.024607	IL2RG	interleukin 2 receptor, gamma [Source:HGNC Symbol;Acc:HGNC:6010]
ENSOARG00000016290	0.97239	2.85454	80.4225	226.639	-1.4947	0.00013971	0.019892	-//-
ENSOARG00000016296	8.41493	24.7773	282.013	794.44	-1.4942	4.8771e-05	0.0093152	HOXC6	homeobox C6 [Source:HGNC Symbol;Acc:HGNC:5128]
ENSOARG00000016306	1.78004	12.0133	26.8669	174.972	-2.7032	7.7399e-08	5.0509e-05	HOXC8	homeobox C8 [Source:HGNC Symbol;Acc:HGNC:5129]
ENSOARG00000016319	1.25265	38.7171	20.6043	619.25	-4.9095	3.7622e-27	2.2096e-23	HOXC9	homeobox C9 [Source:HGNC Symbol;Acc:HGNC:5130]
ENSOARG00000016331	0.0318147	6.71183	0.779997	135.897	-7.4448	5.8417e-16	1.5249e-12	HOXC10	homeobox C10 [Source:HGNC Symbol;Acc:HGNC:5122]
ENSOARG00000016334	0.0108321	7.52312	0.291087	205.374	-9.4626	4.2994e-32	1.0101e-27	WT1	Wilms tumor 1 [Source:HGNC Symbol;Acc:HGNC:12796]
ENSOARG00000016560	1.94914	6.20772	52.2777	161.993	-1.6317	0.00011846	0.017176	IGFALS	insulin-like growth factor binding protein, acid labile subunit [Source:HGNC Symbol;Acc:HGNC:5468]
ENSOARG00000016951	15.0488	2.45219	431.096	67.1573	2.6824	4.8991e-11	7.1935e-08	KRT13	keratin 13, type I [Source:HGNC Symbol;Acc:HGNC:6415]
ENSOARG00000017050	3.8325	1.11717	505.699	143.79	1.8143	7.7063e-05	0.01284	SLC27A6	solute carrier family 27 (fatty acid transporter), member 6 [Source:HGNC Symbol;Acc:HGNC:11000]
ENSOARG00000017076	1.26046	6.20718	20.5135	97.1456	-2.2436	3.5174e-06	0.0013742	PVRIG	poliovirus receptor related immunoglobulin domain containing [Source:HGNC Symbol;Acc:HGNC:32190]
ENSOARG00000017214	61.5153	228.872	2392.47	8493.88	-1.8279	2.7718e-07	0.0001447	NR4A1	nuclear receptor subfamily 4, group A, member 1 [Source:HGNC Symbol;Acc:HGNC:7980]
ENSOARG00000017240	0.886275	0.284819	88.5519	27.642	1.6797	0.00033491	0.03838	HECW1	HECT, C2 and WW domain containing E3 ubiquitin protein ligase 1 [Source:HGNC Symbol;Acc:HGNC:22195]
ENSOARG00000017249	4.19724	13.3337	50.2922	152.886	-1.604	0.00041875	0.045756	-	Uncharacterized protein [Source:UniProtKB/TrEMBL;Acc:W5Q721]
ENSOARG00000017398	0.978949	3.60804	18.2052	59.7479	-1.7145	0.00040319	0.044892	-	Uncharacterized protein [Source:UniProtKB/TrEMBL;Acc:W5Q7I2]
ENSOARG00000017489	96.3999	25.0244	4336.44	1065.93	2.0244	5.2026e-05	0.0097062	AACS	acetoacetyl-CoA synthetase [Source:HGNC Symbol;Acc:HGNC:21298]
ENSOARG00000017562	0.550375	2.81168	12.1911	62.1136	-2.3491	2.5586e-05	0.0060539	CXCR3	chemokine (C-X-C motif) receptor 3 [Source:HGNC Symbol;Acc:HGNC:4540]
ENSOARG00000017838	0.363601	1.48668	15.5833	62.0511	-1.9935	0.0002236	0.028863	AMPH	amphiphysin [Source:HGNC Symbol;Acc:HGNC:471]
ENSOARG00000017877	2.39343	9.37953	47.0356	172.591	-1.8755	6.6432e-06	0.0021379	-	Uncharacterized protein [Source:UniProtKB/TrEMBL;Acc:W5Q8Z2]
ENSOARG00000017994	8.33658	2.75189	1147.54	373.592	1.619	0.00011835	0.017176	LNPEP	leucyl/cystinyl aminopeptidase [Source:HGNC Symbol;Acc:HGNC:6656]
ENSOARG00000018139	0.0690624	0.941693	2.21125	29.6309	-3.7442	5.5715e-06	0.0018179	GCGR	glucagon receptor [Source:HGNC Symbol;Acc:HGNC:4192]
ENSOARG00000018248	55.9762	153.878	1163.03	3115.19	-1.4214	0.00012044	0.017253	MFAP4	microfibrillar-associated protein 4 [Source:HGNC Symbol;Acc:HGNC:7035]
ENSOARG00000018341	377.236	107.927	1463.86	398.705	1.8764	1.7078e-05	0.0044579	-	Metallothionein-1A [Source:UniProtKB/Swiss-Prot;Acc:P67982]
ENSOARG00000018487	7.73328	32.6767	181	743.84	-2.039	9.8034e-08	5.7578e-05	CTSW	cathepsin W [Source:HGNC Symbol;Acc:HGNC:2546]
ENSOARG00000018722	9.42709	3.71231	559.436	212.767	1.3947	0.00014991	0.021089	HDAC4	histone deacetylase 4 [Source:HGNC Symbol;Acc:HGNC:14063]
ENSOARG00000018894	0.135847	1.15704	4.91141	40.1583	-3.0315	7.328e-06	0.0022652	IL21R	interleukin 21 receptor [Source:HGNC Symbol;Acc:HGNC:6006]
ENSOARG00000019090	10.6855	32.3522	338.527	978.06	-1.5307	6.5094e-05	0.011855	RIPK3	receptor-interacting serine-threonine kinase 3 [Source:HGNC Symbol;Acc:HGNC:10021]
ENSOARG00000019168	0.363689	11.7546	5.35542	153.565	-4.8417	1.6657e-12	2.7951e-09	TCF23	transcription factor 23 [Source:HGNC Symbol;Acc:HGNC:18602]
ENSOARG00000019179	0.755045	2.8835	27.1849	100.38	-1.8846	5.6091e-05	0.010295	CD96	CD96 molecule [Source:HGNC Symbol;Acc:HGNC:16892]
ENSOARG00000019197	3.14044	9.72784	107.877	327.243	-1.601	3.5242e-05	0.0074317	IL2RB	interleukin 2 receptor, beta [Source:HGNC Symbol;Acc:HGNC:6009]
ENSOARG00000019395	5.89874	0.836405	111.87	15.2762	2.8725	6.2816e-09	5.4657e-06	ALX3	ALX homeobox 3 [Source:HGNC Symbol;Acc:HGNC:449]
ENSOARG00000019445	1.63486	8.40451	91.8998	451.687	-2.2972	3.7985e-09	3.7183e-06	TRAC	T cell receptor alpha constant [Source:HGNC Symbol;Acc:HGNC:12029]
ENSOARG00000019648	7.95258	25.4643	142.104	427.276	-1.5882	1.6283e-05	0.004347	FAM212B	family with sequence similarity 212, member B [Source:HGNC Symbol;Acc:HGNC:28045]
ENSOARG00000019754	1.31415	10.0045	28.3694	216.741	-2.9336	1.0183e-10	1.4072e-07	GPR1	G protein-coupled receptor 1 [Source:HGNC Symbol;Acc:HGNC:4463]
ENSOARG00000019876	3.63416	9.44953	146.514	366.32	-1.3221	0.00044861	0.047906	ARHGAP25	Rho GTPase activating protein 25 [Source:HGNC Symbol;Acc:HGNC:28951]
ENSOARG00000019884	14.5427	4.16151	998.913	281.441	1.8275	3.3871e-07	0.00017298	CNTN1	contactin 1 [Source:HGNC Symbol;Acc:HGNC:2171]
ENSOARG00000019971	15.5928	52.5119	50.3311	164.457	-1.7082	0.0004477	0.047906	PLN	phospholamban [Source:HGNC Symbol;Acc:HGNC:9080]
ENSOARG00000020138	1.78828	8.42209	43.5187	197.628	-2.1831	3.0514e-05	0.0068273	NGF	nerve growth factor (beta polypeptide) [Source:HGNC Symbol;Acc:HGNC:7808]
ENSOARG00000020249	0.612484	2.9709	40.8481	191.637	-2.23	1.9944e-07	0.00010896	CD2	CD2 molecule [Source:HGNC Symbol;Acc:HGNC:1639]
ENSOARG00000020376	23.2312	0.19082	860.295	7.07373	6.9262	8.2102e-28	6.4294e-24	TBX15	T-box 15 [Source:HGNC Symbol;Acc:HGNC:11594]
ENSOARG00000020422	19.6627	59.0772	323.738	916.331	-1.501	2.7495e-05	0.0063956	HES1	hes family bHLH transcription factor 1 [Source:HGNC Symbol;Acc:HGNC:5192]
ENSOARG00000020442	21.9898	9.71335	3419.36	1456.11	1.2316	0.00040723	0.044916	NOTCH2	notch 2 [Source:HGNC Symbol;Acc:HGNC:7882]
ENSOARG00000020563	4.33995	14.3322	55.8524	177.323	-1.6667	7.3666e-05	0.012587	RERGL	RERG/RAS-like [Source:HGNC Symbol;Acc:HGNC:26213]
ENSOARG00000020769	18.3279	52.6986	528.284	1401.43	-1.4075	4.8563e-05	0.0093152	PLEKHO1	pleckstrin homology domain containing, family O member 1 [Source:HGNC Symbol;Acc:HGNC:24310]
ENSOARG00000020856	1.48822	0.282362	47.9231	8.76937	2.4502	0.00032347	0.037808	LIPC	lipase, hepatic [Source:HGNC Symbol;Acc:HGNC:6619]
ENSOARG00000020968	2.0382	6.83508	70.1029	226.38	-1.6912	2.4224e-05	0.0058198	LCK	LCK proto-oncogene, Src family tyrosine kinase [Source:HGNC Symbol;Acc:HGNC:6524]
ENSOARG00000021002	0.716868	3.81925	8.20692	42.8436	-2.3842	0.00014741	0.020862	-	Uncharacterized protein [Source:UniProtKB/TrEMBL;Acc:W5QIL8]
ENSOARG00000022822	0	10.5794	0	18.2098	#NAME?	0.00018109	0.024311	SNORD14	Small nucleolar RNA SNORD14 [Source:RFAM;Acc:RF00016]
ENSOARG00000022840	46.5559	143.573	274.806	807.614	-1.5553	2.2613e-05	0.0055338	RNase_MRP	RNase MRP [Source:RFAM;Acc:RF00030]
ENSOARG00000022982	5.61468	18.0806	37.8358	117.672	-1.637	0.00029346	0.035537	snoU85	Small nucleolar RNA U85 [Source:RFAM;Acc:RF01296]
ENSOARG00000023715	343.912	906.084	2409.16	6061.32	-1.3311	0.00016335	0.022442	7SK	7SK RNA [Source:RFAM;Acc:RF00100]
ENSOARG00000023987	0.526492	4.86368	2.50798	21.0384	-3.0684	0.00033281	0.038361	U3	Small nucleolar RNA U3 [Source:RFAM;Acc:RF00012]
ENSOARG00000024209	45.1182	138.742	67.8728	195.355	-1.5252	9.7971e-05	0.015243	H19_1	H19 conserved region 1 [Source:RFAM;Acc:RF01972]
ENSOARG00000024340	8.69458	29.558	54.6268	178.485	-1.7081	4.643e-05	0.0090375	Metazoa_SRP	Metazoan signal recognition particle RNA [Source:RFAM;Acc:RF00017]
ENSOARG00000024490	1.32218	19.3833	5.92094	83.2346	-3.8133	4.6178e-05	0.0090375	U3	Small nucleolar RNA U3 [Source:RFAM;Acc:RF00012]
ENSOARG00000025564	0.276305	1.00619	25.5367	90.3102	-1.8223	0.00016065	0.022333	-//-
ENSOARG00000025779	0.792235	21.468	19.2613	495.195	-4.6842	1.8869e-09	2.015e-06	-//-
ENSOARG00000026498	0.293211	2.01256	11.6739	75.9732	-2.7022	4.4726e-07	0.00021444	-//-
Novel00033	8.71786	1.05879	522.402	60.2709	3.1156	2.8058e-14	5.9925e-11	-//-
Novel00116	160.251	504.114	1796.15	5344.66	-1.5732	5.0917e-05	0.0096468	-//-
Novel00292	0.319249	2.9955	10.6719	97.1233	-3.186	1.4666e-09	1.6407e-06	-//-
Novel00685	7.65225	0.621004	393.206	30.6034	3.6835	1.1544e-07	6.6145e-05	-//-
Novel00713	1.33356	5.25446	82.0905	304.999	-1.8935	8.3359e-05	0.0136	-//-
Novel00796	0.0331579	0.715924	0.910625	19.8815	-4.4484	4.3517e-05	0.008738	-//-
Novel00803	3.66051	1.25597	133.085	44.1957	1.5904	0.00023325	0.029781	-//-
Novel00812	1.15143	6.0456	13.6255	70.8483	-2.3784	1.6794e-05	0.0044331	-//-
Novel00813	4.27023	1.13337	79.3808	20.3632	1.9628	0.00025868	0.032498	-//-
Novel00917	6.60362	18.0972	2032.19	5568.56	-1.4543	8.7135e-05	0.013947	-//-
Novel01059	0.0909418	0.85364	11.006	99.4788	-3.1761	2.304e-09	2.3534e-06	-//-
Novel01101	1.36459	0.0518401	110.205	3.96388	4.7971	3.9599e-08	2.7361e-05	-//-
Novel01362	0.294372	1.95609	114.782	732.091	-2.6731	6.704e-12	1.05e-08	-//-
Novel01436	16.792	6.99102	1037.36	413.496	1.327	0.00026166	0.032525	-//-
Novel01686	0.0114723	0.48439	0.779997	27.0596	-5.1165	0.00011725	0.017176	-//-
Novel01807	0.0720964	1.28841	2.50234	44.1277	-4.1403	2.2545e-08	1.7085e-05	-//-
Novel01831	3.78539	10.5465	161.019	431.902	-1.4235	0.00015152	0.021189	--	Cdc42p [Rhizophagus irregularis DAOM 197198w]
Novel01890	0.153989	1.41862	4.3666	38.6456	-3.1457	5.3632e-06	0.0017746	-//-
Novel01918	0.0341035	0.996142	2.36606	69.7835	-4.8823	1.3923e-12	2.516e-09	-//-
Novel02382	0.673968	0.0118867	18.1208	0.29215	5.9548	2.0472e-05	0.0051769	-//-
Novel02441	9.60617	31.4661	128.017	407.313	-1.6698	1.4098e-05	0.0038512	-//-
Novel02539	7.51115	22.281	325.629	911.481	-1.485	2.8103e-05	0.0064099	-//-

## Sheet: SAT vs. TAT
Gene_ID	FPKM_SAT	FPKM_TAT	ReadCount_SAT	ReadCount_TAT	Log2FoldChange	p-value	FDR	Gene_Symbol	Description
ENSOARG00000000119	8.39928	21.9276	171.26	526.601	-1.6205	6.5594e-05	0.010628	LMOD1	leiomodin 1 (smooth muscle) [Source:HGNC Symbol;Acc:HGNC:6647]
ENSOARG00000000196	39.1568	95.3068	1025.31	2878.01	-1.489	9.5003e-05	0.013717	-	Uncharacterized protein [Source:UniProtKB/TrEMBL;Acc:W5NPU0]
ENSOARG00000000322	9.07047	20.0723	311.379	816.398	-1.3906	0.0004158	0.03479	MIEF2	mitochondrial elongation factor 2 [Source:HGNC Symbol;Acc:HGNC:17920]
ENSOARG00000000417	6.9889	33.5685	51.2504	279.043	-2.4449	0.00041169	0.034692	S100A9	S100 calcium binding protein A9 [Source:HGNC Symbol;Acc:HGNC:10499]
ENSOARG00000000427	0	2.83614	0	40.4519	#NAME?	1.3685e-05	0.0034111
ENSOARG00000000429	0.777819	2.56609	23.6813	94.9347	-2.0032	5.0524e-05	0.0091432	MROH6	maestro heat-like repeat family member 6 [Source:HGNC Symbol;Acc:HGNC:27814]
ENSOARG00000000573	41.6006	12.2952	676.558	241.365	1.487	0.00023185	0.024588	-	Uncharacterized protein [Source:UniProtKB/TrEMBL;Acc:W5NQZ2]
ENSOARG00000000644	3.50583	9.62866	115.499	366.819	-1.6672	2.7232e-05	0.0058093	FAM83D	family with sequence similarity 83, member D [Source:HGNC Symbol;Acc:HGNC:16122]
ENSOARG00000000705	0.45485	1.97871	7.67156	39.0111	-2.3463	0.00031719	0.029634	-	Uncharacterized protein [Source:UniProtKB/TrEMBL;Acc:W5NRD6]
ENSOARG00000000780	53.0084	130.331	901.059	2595.68	-1.5264	4.5584e-05	0.0085612	SLC2A4RG	SLC2A4 regulator [Source:HGNC Symbol;Acc:HGNC:15930]
ENSOARG00000000865	91.5075	210.123	716.421	1901.56	-1.4083	0.00015019	0.018917	HCFC1R1	host cell factor C1 regulator 1 (XPO1 dependent) [Source:HGNC Symbol;Acc:HGNC:21198]
ENSOARG00000000945	14.2389	35.4598	313.893	907.383	-1.5314	6.0092e-05	0.010311	NSMF	NMDA receptor synaptonuclear signaling and neuronal migration factor [Source:HGNC Symbol;Acc:HGNC:29843]
ENSOARG00000000956	5.51757	0.970959	73.7566	16.0773	2.1978	3.8621e-05	0.0075579	-	Uncharacterized protein [Source:UniProtKB/TrEMBL;Acc:W5NS48]
ENSOARG00000000965	28.7711	66.1294	320.805	861.845	-1.4257	0.00018064	0.020899	ZNF511	zinc finger protein 511 [Source:HGNC Symbol;Acc:HGNC:28445]
ENSOARG00000001016	101.302	223.752	2486.7	6351.68	-1.3529	0.00025713	0.026244	EPN1	epsin 1 [Source:HGNC Symbol;Acc:HGNC:21604]
ENSOARG00000001059	89.1565	242.017	1260.76	3938.5	-1.6434	0.0002789	0.027584	-	Uncharacterized protein [Source:UniProtKB/TrEMBL;Acc:W5NSF7]
ENSOARG00000001401	5.85164	12.8341	275.781	710.226	-1.3648	0.00053528	0.04244	EXD3	exonuclease 3'-5' domain containing 3 [Source:HGNC Symbol;Acc:HGNC:26023]
ENSOARG00000001456	87.1782	16.2013	3709.32	808.005	2.1987	1.256e-08	1.0256e-05	GFPT2	glutamine-fructose-6-phosphate transaminase 2 [Source:HGNC Symbol;Acc:HGNC:4242]
ENSOARG00000001487	0	2.24944	0	50.5794	#NAME?	5.9697e-15	1.7669e-11	ISL2	ISL LIM homeobox 2 [Source:HGNC Symbol;Acc:HGNC:18524]
ENSOARG00000001516	40.8078	119.649	1052.28	3563.83	-1.7599	3.8773e-06	0.0012241	SERINC2	serine incorporator 2 [Source:HGNC Symbol;Acc:HGNC:23231]
ENSOARG00000001568	24.7376	2.32345	1518.17	166.171	3.1916	1.3259e-05	0.00334	-	Uncharacterized protein [Source:UniProtKB/TrEMBL;Acc:W5NU00]
ENSOARG00000001634	8.8767	2.68763	288.261	107.01	1.4296	0.00067867	0.048846	PHACTR2	phosphatase and actin regulator 2 [Source:HGNC Symbol;Acc:HGNC:20956]
ENSOARG00000001656	5.48328	13.5769	55.3641	161.98	-1.5488	0.00037237	0.032696	TMEM52	transmembrane protein 52 [Source:HGNC Symbol;Acc:HGNC:27916]
ENSOARG00000001750	6.36477	1.84168	649.189	227.986	1.5097	0.00019646	0.021993	PEAK1	pseudopodium-enriched atypical kinase 1 [Source:HGNC Symbol;Acc:HGNC:29431]
ENSOARG00000001755	31.3072	6.33368	1213.57	285.083	2.0898	1.9379e-07	0.00010926	-	Uncharacterized protein [Source:UniProtKB/TrEMBL;Acc:W5NUJ7]
ENSOARG00000001806	0.609968	1.88733	33.7209	120.414	-1.8363	7.1553e-05	0.01122	THEM6	thioesterase superfamily member 6 [Source:HGNC Symbol;Acc:HGNC:29656]
ENSOARG00000001878	47.1502	9.67737	3975.65	947.978	2.0683	6.2546e-05	0.01043	-	Uncharacterized protein [Source:UniProtKB/TrEMBL;Acc:W5NUX8]
ENSOARG00000002053	121.219	12.6378	3238.77	397.66	3.0258	5.7272e-14	1.5068e-10	EFEMP1	EGF containing fibulin-like extracellular matrix protein 1 [Source:HGNC Symbol;Acc:HGNC:3218]
ENSOARG00000002226	180.752	429.376	1113.84	3038.7	-1.4479	9.8898e-05	0.014133	-	Uncharacterized protein [Source:UniProtKB/TrEMBL;Acc:W5NW00]
ENSOARG00000002260	23.8475	82.8349	332.801	1369.37	-2.0408	0.0001969	0.021993	MDFI	MyoD family inhibitor [Source:HGNC Symbol;Acc:HGNC:6967]
ENSOARG00000002310	0.363466	3.68113	5.50206	68.1874	-3.6315	3.9157e-07	0.00020605	FRMD1	FERM domain containing 1 [Source:HGNC Symbol;Acc:HGNC:21240]
ENSOARG00000002475	1.54	0.198515	33.9243	5.30472	2.677	0.00019089	0.021627	PEG10	retrotransposon-derived protein PEG10 [Source:RefSeq peptide;Acc:NP_001277722]
ENSOARG00000002519	13.2837	31.6717	157.513	440.321	-1.4831	0.00019	0.021627	NDOR1	NADPH dependent diflavin oxidoreductase 1 [Source:HGNC Symbol;Acc:HGNC:29838]
ENSOARG00000002535	0.39006	1.3478	14.1365	57.3647	-2.0207	0.00044418	0.036647	SLC34A3	solute carrier family 34 (type II sodium/phosphate cotransporter), member 3 [Source:HGNC Symbol;Acc:HGNC:20305]
ENSOARG00000002548	9.328	2.30781	214.003	61.0354	1.8099	0.0002481	0.025645	UST	uronyl-2-sulfotransferase [Source:HGNC Symbol;Acc:HGNC:17223]
ENSOARG00000002554	3.21751	10.171	253.952	933.994	-1.8789	2.0364e-06	0.00075343	SLC22A18	solute carrier family 22, member 18 [Source:HGNC Symbol;Acc:HGNC:10964]
ENSOARG00000002587	4.52984	0.937227	285.794	66.822	2.0966	6.4361e-07	0.00029308	CLEC4G	C-type lectin domain family 4, member G [Source:HGNC Symbol;Acc:HGNC:24591]
ENSOARG00000002613	7.7111	2.06105	133.79	40.8432	1.7118	0.00015345	0.019035	SHOX2	short stature homeobox 2 [Source:HGNC Symbol;Acc:HGNC:10854]
ENSOARG00000002637	13.9369	3.12278	1141.36	289.861	1.9773	4.3133e-07	0.00021278	-	Uncharacterized protein [Source:UniProtKB/TrEMBL;Acc:W5NXA8]
ENSOARG00000002722	41.1627	3.97962	896.668	98.9396	3.18	4.7691e-09	4.9099e-06	-	Uncharacterized protein [Source:UniProtKB/TrEMBL;Acc:W5NXJ3]
ENSOARG00000002740	10.9276	37.3923	288.679	1177.54	-2.0282	5.9696e-07	0.00028271	HSF4	heat shock transcription factor 4 [Source:HGNC Symbol;Acc:HGNC:5227]
ENSOARG00000002849	11.6308	26.6269	69.4205	186.52	-1.4259	0.00067177	0.048497	-	Uncharacterized protein [Source:UniProtKB/TrEMBL;Acc:W5NXX8]
ENSOARG00000002862	16.4123	2.76115	1207.51	246.085	2.2948	2.2367e-06	0.00080245	CD163	CD163 molecule [Source:HGNC Symbol;Acc:HGNC:1631]
ENSOARG00000002967	1.35719	4.5486	67.0193	267.359	-1.9961	4.3832e-06	0.0013656	SARDH	sarcosine dehydrogenase [Source:HGNC Symbol;Acc:HGNC:10536]
ENSOARG00000003028	1.20717	0.301093	107.346	32.3981	1.7283	0.00026351	0.026575	DOCK2	dedicator of cytokinesis 2 [Source:HGNC Symbol;Acc:HGNC:2988]
ENSOARG00000003268	1.9367	0.285588	80.4123	14.7753	2.4442	0.00049802	0.040336	NAALAD2	N-acetylated alpha-linked acidic dipeptidase 2 [Source:HGNC Symbol;Acc:HGNC:14526]
ENSOARG00000003422	5.51825	0.498015	183.112	19.6591	3.2195	3.8297e-07	0.00020605	SMPD3	sphingomyelin phosphodiesterase 3, neutral membrane (neutral sphingomyelinase II) [Source:HGNC Symbol;Acc:HGNC:14240]
ENSOARG00000003435	35.4069	89.1027	779.72	2260.36	-1.5355	5.4627e-05	0.0097256	VWA1	von Willebrand factor A domain containing 1 [Source:HGNC Symbol;Acc:HGNC:30910]
ENSOARG00000003437	0.620503	0.0223576	42.36	1.54596	4.7761	3.8412e-05	0.0075579	PITX2	paired-like homeodomain 2 [Source:HGNC Symbol;Acc:HGNC:9005]
ENSOARG00000003530	4.48503	13.8843	85.1999	303.996	-1.8351	2.3311e-05	0.0052057	RHBDD3	rhomboid domain containing 3 [Source:HGNC Symbol;Acc:HGNC:1308]
ENSOARG00000003613	8.83448	2.95204	857.895	344.717	1.3154	0.00065699	0.047868	UBR2	ubiquitin protein ligase E3 component n-recognin 2 [Source:HGNC Symbol;Acc:HGNC:21289]
ENSOARG00000003872	0.963559	0.0906629	19.9697	2.15628	3.2112	0.00057957	0.045101	DHRS9	dehydrogenase/reductase (SDR family) member 9 [Source:HGNC Symbol;Acc:HGNC:16888]
ENSOARG00000003936	0.0138856	3.60289	0.287588	90.7856	-8.3023	2.4361e-09	2.8842e-06	CALB2	calbindin 2 [Source:HGNC Symbol;Acc:HGNC:1435]
ENSOARG00000004053	0.749922	2.46842	24.8883	96.7921	-1.9594	0.00010122	0.014183	PRAM1	PML-RARA regulated adaptor molecule 1 [Source:HGNC Symbol;Acc:HGNC:30091]
ENSOARG00000004174	28.9211	64.9899	353.81	919.525	-1.3779	0.00053276	0.04244	TAGLN	transgelin [Source:HGNC Symbol;Acc:HGNC:11553]
ENSOARG00000004250	2.19349	6.1425	28.0431	95.2534	-1.7641	0.00033598	0.030717	FAM57B	family with sequence similarity 57, member B [Source:HGNC Symbol;Acc:HGNC:25295]
ENSOARG00000004298	20.5848	6.07748	292.495	103.126	1.504	0.0002538	0.026016	-	Uncharacterized protein [Source:UniProtKB/TrEMBL;Acc:W5P2F1]
ENSOARG00000004497	5.80921	1.78593	337.963	122.819	1.4603	0.00037282	0.032696	ZNF445	zinc finger protein 445 [Source:HGNC Symbol;Acc:HGNC:21018]
ENSOARG00000004672	0.523215	2.19667	7.01314	34.7658	-2.3095	0.00053239	0.04244	FAM69C	family with sequence similarity 69, member C [Source:HGNC Symbol;Acc:HGNC:31729]
ENSOARG00000004721	132.886	18.3613	629.698	101.18	2.6377	1.6856e-05	0.0040317	-	regakine 1-like protein precursor [Source:RefSeq peptide;Acc:NP_001093099]
ENSOARG00000004778	59.7892	16.998	627.264	214.431	1.5486	0.00010906	0.015102	-	Uncharacterized protein [Source:UniProtKB/TrEMBL;Acc:W5P3W3]
ENSOARG00000004869	8.65106	2.65039	253.071	91.8938	1.4615	0.00039264	0.033564	UTP15	UTP15, U3 small nucleolar ribonucleoprotein, homolog (S. cerevisiae) [Source:HGNC Symbol;Acc:HGNC:25758]
ENSOARG00000004980	1.19191	4.82196	38.7678	187.227	-2.2719	7.0263e-07	0.0003081	MATN4	matrilin 4 [Source:HGNC Symbol;Acc:HGNC:6910]
ENSOARG00000005007	10.9084	2.34124	342.033	80.5346	2.0865	4.0388e-07	0.0002079	DACT2	dishevelled-binding antagonist of beta-catenin 2 [Source:HGNC Symbol;Acc:HGNC:21231]
ENSOARG00000005056	1.26496	0.193278	55.3813	9.58748	2.5302	1.9991e-05	0.0046129	CDH19	cadherin 19, type 2 [Source:HGNC Symbol;Acc:HGNC:1758]
ENSOARG00000005117	48.8114	8.6388	1470.43	295.475	2.3151	3.1186e-09	3.4196e-06	THBD	thrombomodulin [Source:HGNC Symbol;Acc:HGNC:11784]
ENSOARG00000005188	6.1068	18.1293	796.96	2760.5	-1.7923	0.00066889	0.048436	MAP1B	microtubule-associated protein 1B [Source:HGNC Symbol;Acc:HGNC:6836]
ENSOARG00000005236	1.05802	0.159493	37.8223	7.35802	2.3618	0.00059598	0.045353	VSIG4	V-set and immunoglobulin domain containing 4 [Source:HGNC Symbol;Acc:HGNC:17032]
ENSOARG00000005309	10.5038	3.15669	598.185	212.329	1.4943	0.00016271	0.019557	SH3D19	SH3 domain containing 19 [Source:HGNC Symbol;Acc:HGNC:30418]
ENSOARG00000005322	56.9651	12.4732	466.262	121.014	1.946	0.00012926	0.017326	SRGN	serglycin [Source:HGNC Symbol;Acc:HGNC:9361]
ENSOARG00000005365	0.953912	0.255145	79.381	24.4267	1.7003	0.00061828	0.045874	FHOD3	formin homology 2 domain containing 3 [Source:HGNC Symbol;Acc:HGNC:26178]
ENSOARG00000005434	0.0277149	3.04517	0.67943	81.2491	-6.9019	2.3465e-05	0.0052057	ZIC1	Zic family member 1 [Source:HGNC Symbol;Acc:HGNC:12872]
ENSOARG00000005467	0.0113076	0.683732	1.1348	86.1406	-6.2462	6.8416e-05	0.010946	ZIC4	Zic family member 4 [Source:HGNC Symbol;Acc:HGNC:20393]
ENSOARG00000005548	19.7484	6.31648	810.128	303.667	1.4157	0.00021585	0.023772	SLC39A6	solute carrier family 39 (zinc transporter), member 6 [Source:HGNC Symbol;Acc:HGNC:18607]
ENSOARG00000005581	0.557238	0.0631877	24.6401	3.23442	2.9294	0.00038309	0.033107	PPARGC1A	peroxisome proliferator-activated receptor gamma, coactivator 1 alpha [Source:HGNC Symbol;Acc:HGNC:9237]
ENSOARG00000005766	25.6235	63.9561	472.237	1394.05	-1.5617	5.3076e-05	0.0095211	GPR146	G protein-coupled receptor 146 [Source:HGNC Symbol;Acc:HGNC:21718]
ENSOARG00000005972	2.00843	0.198811	30.9344	3.65228	3.0823	4.5214e-05	0.0085612	TNFSF15	tumor necrosis factor (ligand) superfamily, member 15 [Source:HGNC Symbol;Acc:HGNC:11931]
ENSOARG00000006063	404.231	91.8473	2109.34	574.914	1.8754	1.9819e-06	0.00074492	EIF4EBP2	eukaryotic translation initiation factor 4E binding protein 2 [Source:HGNC Symbol;Acc:HGNC:3289]
ENSOARG00000006073	4.33543	0.15671	86.0161	3.09192	4.798	1.8572e-13	3.9979e-10	MAB21L1	mab-21-like 1 (C. elegans) [Source:HGNC Symbol;Acc:HGNC:6757]
ENSOARG00000006117	6.71195	19.3967	187.734	636.001	-1.7603	2.406e-05	0.0052752	SLC41A3	solute carrier family 41, member 3 [Source:HGNC Symbol;Acc:HGNC:31046]
ENSOARG00000006240	4.02239	10.6796	77.1806	239.842	-1.6358	0.00014398	0.018733	XRCC3	X-ray repair complementing defective repair in Chinese hamster cells 3 [Source:HGNC Symbol;Acc:HGNC:12830]
ENSOARG00000006259	30.2868	65.1403	1395.73	3516.57	-1.3332	0.00036229	0.032372	GUK1	guanylate kinase 1 [Source:HGNC Symbol;Acc:HGNC:4693]
ENSOARG00000006378	1.27068	11.3428	30.6429	343.928	-3.4885	6.49e-09	5.9107e-06	BMP5	bone morphogenetic protein 5 [Source:HGNC Symbol;Acc:HGNC:1072]
ENSOARG00000006455	2.94435	6.66459	213.269	584.829	-1.4553	0.00030217	0.028751	CPNE9	copine family member IX [Source:HGNC Symbol;Acc:HGNC:24336]
ENSOARG00000006614	0.782063	0.0472476	22.1575	1.53667	3.8499	4.9033e-05	0.0090003	TBX5	T-box 5 [Source:HGNC Symbol;Acc:HGNC:11604]
ENSOARG00000006626	2.48429	7.02495	83.796	276.667	-1.7232	5.0583e-05	0.0091432	IRF7	interferon regulatory factor 7 [Source:HGNC Symbol;Acc:HGNC:6122]
ENSOARG00000006737	17.7364	3.75562	96.4002	24.3535	1.9849	0.00019521	0.021993	KCNE3	potassium channel, voltage gated subfamily E regulatory beta subunit 3 [Source:HGNC Symbol;Acc:HGNC:6243]
ENSOARG00000007034	8.16113	1.02774	125.294	17.8626	2.8103	0.00036844	0.03266	HOXB5	homeobox B5 [Source:HGNC Symbol;Acc:HGNC:5116]
ENSOARG00000007118	20.7896	47.1479	413.792	1093.76	-1.4023	0.00032172	0.029758	TP53I13	tumor protein p53 inducible protein 13 [Source:HGNC Symbol;Acc:HGNC:25102]
ENSOARG00000007297	13.7475	41.1614	228.947	799.073	-1.8033	0.00049743	0.040336	ZBTB42	zinc finger and BTB domain containing 42 [Source:HGNC Symbol;Acc:HGNC:32550]
ENSOARG00000007322	3.30712	0.518814	93.5286	17.7185	2.4002	0.00047707	0.039088	-	Uncharacterized protein [Source:UniProtKB/TrEMBL;Acc:W5PBN8]
ENSOARG00000007344	23.7847	4.34252	3023.6	669.512	2.1751	1.0786e-06	0.00043288	ABCA1	ATP-binding cassette, sub-family A (ABC1), member 1 [Source:HGNC Symbol;Acc:HGNC:29]
ENSOARG00000007525	23.9432	7.9356	1347.39	523.101	1.365	0.00037439	0.032713	AXL	AXL receptor tyrosine kinase [Source:HGNC Symbol;Acc:HGNC:905]
ENSOARG00000007625	3.00048	0.681397	95.6107	25.533	1.9048	0.00016033	0.01937	IL10RA	interleukin 10 receptor, alpha [Source:HGNC Symbol;Acc:HGNC:5964]
ENSOARG00000007679	3.8004	0.652142	129.181	27.2749	2.2437	3.4805e-06	0.001129	-	Uncharacterized protein [Source:UniProtKB/TrEMBL;Acc:W5PCS4]
ENSOARG00000007758	4.57534	1.10416	95.3813	26.5469	1.8452	0.00014851	0.018906	-	Uncharacterized protein [Source:UniProtKB/TrEMBL;Acc:W5PD11]
ENSOARG00000007814	5.68877	1.19827	563.536	142.472	1.9838	9.4353e-07	0.00039196	SYK	spleen tyrosine kinase [Source:HGNC Symbol;Acc:HGNC:11491]
ENSOARG00000007864	10.805	3.30325	452.078	162.759	1.4738	0.00022524	0.024328	LCP1	lymphocyte cytosolic protein 1 (L-plastin) [Source:HGNC Symbol;Acc:HGNC:6528]
ENSOARG00000007886	8.72798	22.2574	78.7711	231.785	-1.557	0.00018915	0.021627	-	Uncharacterized protein [Source:UniProtKB/TrEMBL;Acc:W5PDE6]
ENSOARG00000007935	3.08113	0.813683	162.95	51.8133	1.653	0.00036603	0.032584	PLA2G4A	phospholipase A2, group IVA (cytosolic, calcium-dependent) [Source:HGNC Symbol;Acc:HGNC:9035]
ENSOARG00000007977	189.936	57.8685	2595.16	912.105	1.5086	7.8821e-05	0.011888	C1QB	complement component 1, q subcomponent, B chain [Source:HGNC Symbol;Acc:HGNC:1242]
ENSOARG00000007991	137.676	43.7373	2037.69	742.682	1.4561	0.00012277	0.016804	C1QC	complement component 1, q subcomponent, C chain [Source:HGNC Symbol;Acc:HGNC:1245]
ENSOARG00000008001	18.7566	5.55907	1670.22	569.014	1.5535	4.6755e-05	0.0086494	C1QA	complement component 1, q subcomponent, A chain [Source:HGNC Symbol;Acc:HGNC:1241]
ENSOARG00000008216	8.77396	2.42683	312.802	102.836	1.6049	9.0429e-05	0.013218	PDP1	pyruvate dehyrogenase phosphatase catalytic subunit 1 [Source:HGNC Symbol;Acc:HGNC:9279]
ENSOARG00000008246	6.91053	1.99273	350.214	122.93	1.5104	0.00022667	0.024328	RB1	retinoblastoma 1 [Source:HGNC Symbol;Acc:HGNC:9884]
ENSOARG00000008262	2.06699	0.501308	197.555	58.3416	1.7597	6.5417e-05	0.010628	SCN2B	sodium channel, voltage gated, type II beta subunit [Source:HGNC Symbol;Acc:HGNC:10589]
ENSOARG00000008335	0.816166	2.72293	80.3522	322.339	-2.0042	0.00026374	0.026575	COL11A2	collagen, type XI, alpha 2 [Source:HGNC Symbol;Acc:HGNC:2187]
ENSOARG00000008349	1.65816	0.291763	78.4045	15.7388	2.3166	9.2835e-06	0.0025267	TACSTD2	tumor-associated calcium signal transducer 2 [Source:HGNC Symbol;Acc:HGNC:11530]
ENSOARG00000008480	7.15407	0.326182	273.079	14.2463	4.2607	1.1939e-08	1.0097e-05	ALOX15	arachidonate 15-lipoxygenase [Source:HGNC Symbol;Acc:HGNC:433]
ENSOARG00000008521	2.71166	11.2503	65.7937	323.324	-2.297	6.7639e-08	4.2148e-05	SHC2	SHC (Src homology 2 domain containing) transforming protein 2 [Source:HGNC Symbol;Acc:HGNC:29869]
ENSOARG00000008550	5.33524	1.33512	690.714	216.353	1.6747	0.00040755	0.034465	CFH	complement factor H [Source:HGNC Symbol;Acc:HGNC:4883]
ENSOARG00000008558	1.55175	8.17292	52.5141	329.279	-2.6485	0.00039887	0.033852	BCO1	beta-carotene oxygenase 1 [Source:HGNC Symbol;Acc:HGNC:13815]
ENSOARG00000008637	12.0531	26.0123	1299.49	3251.78	-1.3233	0.00036144	0.032372	TPGS1	tubulin polyglutamylase complex subunit 1 [Source:HGNC Symbol;Acc:HGNC:25058]
ENSOARG00000008661	3.2921	8.11886	115.078	340.06	-1.5632	0.00020022	0.022258	CCDC37	coiled-coil domain containing 37 [Source:HGNC Symbol;Acc:HGNC:26842]
ENSOARG00000008873	16.8368	35.828	845.097	2069.6	-1.2922	0.0005615	0.043881	SH3GLB2	SH3-domain GRB2-like endophilin B2 [Source:HGNC Symbol;Acc:HGNC:10834]
ENSOARG00000008878	2.37519	0.162832	43.9941	3.61626	3.6047	7.5332e-05	0.011583	CD84	CD84 molecule [Source:HGNC Symbol;Acc:HGNC:1704]
ENSOARG00000009000	2.73377	0.634583	168.869	46.6192	1.8569	2.2821e-05	0.0051959	ITGAM	integrin alpha-M precursor [Source:RefSeq peptide;Acc:NP_001076062]
ENSOARG00000009234	2.67501	0.711557	124.77	40.7205	1.6154	0.00031525	0.029634	AHR	aryl hydrocarbon receptor [Source:HGNC Symbol;Acc:HGNC:348]
ENSOARG00000009301	16.7342	4.0314	683.069	198.772	1.7809	7.0975e-06	0.0021008	COLEC12	collectin sub-family member 12 [Source:HGNC Symbol;Acc:HGNC:16016]
ENSOARG00000009333	28.2311	58.4065	753.172	1804.32	-1.2604	0.00062599	0.045941	PLIN5	perilipin 5 [Source:HGNC Symbol;Acc:HGNC:33196]
ENSOARG00000009347	14.9865	5.1372	836.327	336.245	1.3146	0.00064512	0.047147	DSE	dermatan sulfate epimerase [Source:HGNC Symbol;Acc:HGNC:21144]
ENSOARG00000009599	9.28832	1.89983	250.655	61.222	2.0336	2.9953e-06	0.00099895	ALDH1A3	aldehyde dehydrogenase 1 family, member A3 [Source:HGNC Symbol;Acc:HGNC:409]
ENSOARG00000009627	71.9906	10.4878	459.58	75.2717	2.6101	6.5875e-10	9.7491e-07	CCL2	chemokine (C-C motif) ligand 2 [Source:HGNC Symbol;Acc:HGNC:10618]
ENSOARG00000009639	0.472049	2.09521	11.3494	59.0113	-2.3784	2.9038e-05	0.0060849	-	Uncharacterized protein [Source:UniProtKB/TrEMBL;Acc:W5PIS0]
ENSOARG00000009675	0.0861703	9.49764	6.34369	874.719	-7.1074	1.7183e-39	4.0688e-35	HOXA10	homeobox A10 [Source:HGNC Symbol;Acc:HGNC:5100]
ENSOARG00000009680	0.426678	19.567	6.14349	339.501	-5.7882	5.5467e-27	3.2835e-23	HOXA9	homeobox A9 [Source:HGNC Symbol;Acc:HGNC:5109]
ENSOARG00000009758	1.09399	5.09058	14.527	80.9184	-2.4777	2.909e-06	0.00098405	HOXA6	homeobox A6 [Source:HGNC Symbol;Acc:HGNC:5107]
ENSOARG00000009830	3.67255	1.21895	757.663	301.526	1.3293	0.00068745	0.049031	KMT2A	lysine (K)-specific methyltransferase 2A [Source:HGNC Symbol;Acc:HGNC:7132]
ENSOARG00000009845	31.9428	6.08207	1715.22	393.937	2.1224	8.9137e-08	5.2767e-05	OSMR	oncostatin M receptor [Source:HGNC Symbol;Acc:HGNC:8507]
ENSOARG00000009949	31.9677	2.67015	1003.2	98.3735	3.3502	6.0193e-09	5.9107e-06	SKAP2	src kinase associated phosphoprotein 2 [Source:HGNC Symbol;Acc:HGNC:15687]
ENSOARG00000009957	9.00266	2.49268	266.608	88.1399	1.5969	0.00014975	0.018917	CREB3L2	cAMP responsive element binding protein 3-like 2 [Source:HGNC Symbol;Acc:HGNC:23720]
ENSOARG00000010051	1.76911	0.178604	24.0846	2.88395	3.062	0.00030665	0.029044	-	Uncharacterized protein [Source:UniProtKB/TrEMBL;Acc:W5PK06]
ENSOARG00000010070	8.66529	2.18768	170.861	50.9957	1.7444	0.00060518	0.045371	-	Uncharacterized protein [Source:UniProtKB/TrEMBL;Acc:W5PK31]
ENSOARG00000010088	26.0251	4.28995	898.529	177.571	2.3392	2.7547e-05	0.005824	VIT	vitrin [Source:HGNC Symbol;Acc:HGNC:12697]
ENSOARG00000010094	6.44615	0.78329	108.707	15.3194	2.827	3.4895e-08	2.3066e-05	FCGR2B	low affinity immunoglobulin gamma Fc region receptor II-b precursor [Source:RefSeq peptide;Acc:NP_001132925]
ENSOARG00000010097	1.63242	0.386654	77.1607	22.0829	1.8049	0.00054582	0.043082	CLCN5	chloride channel, voltage-sensitive 5 [Source:HGNC Symbol;Acc:HGNC:2023]
ENSOARG00000010418	8.86088	2.83512	405.358	153.158	1.4042	0.0005136	0.041366	ATF6	activating transcription factor 6 [Source:HGNC Symbol;Acc:HGNC:791]
ENSOARG00000010448	1.68222	0.370234	120.192	30.9299	1.9583	4.0189e-05	0.0078002	ERBB3	erb-b2 receptor tyrosine kinase 3 [Source:HGNC Symbol;Acc:HGNC:3431]
ENSOARG00000010473	7.05959	1.64518	420.348	115.82	1.8597	0.00037846	0.032826	EPB41L3	erythrocyte membrane protein band 4.1-like 3 [Source:HGNC Symbol;Acc:HGNC:3380]
ENSOARG00000010490	11.4644	3.65281	296.235	108.711	1.4462	0.00045767	0.037629	-	Uncharacterized protein [Source:UniProtKB/TrEMBL;Acc:W5PLE0]
ENSOARG00000010521	0.853919	0.159166	38.1012	8.45474	2.172	0.00061604	0.045874	PDE4B	phosphodiesterase 4B, cAMP-specific [Source:HGNC Symbol;Acc:HGNC:8781]
ENSOARG00000010545	4.20382	0.439846	107.319	13.7548	2.9639	0.00043918	0.036361	ENPP5	ectonucleotide pyrophosphatase/phosphodiesterase 5 (putative) [Source:HGNC Symbol;Acc:HGNC:13717]
ENSOARG00000010615	38.8562	10.7607	3053.13	1020.51	1.581	5.6092e-05	0.009912	CPD	carboxypeptidase D [Source:HGNC Symbol;Acc:HGNC:2301]
ENSOARG00000010653	4.59994	18.9192	106.505	526.807	-2.3064	0.00037626	0.032755	ELMOD1	ELMO/CED-12 domain containing 1 [Source:HGNC Symbol;Acc:HGNC:25334]
ENSOARG00000010904	1.32769	4.25668	44.3742	167.049	-1.9125	2.7114e-05	0.0058093	CCDC64	coiled-coil domain containing 64 [Source:HGNC Symbol;Acc:HGNC:28095]
ENSOARG00000010944	43.055	7.71972	344.147	66.6257	2.3689	1.8174e-08	1.3448e-05	-	Uncharacterized protein [Source:UniProtKB/TrEMBL;Acc:W5PMR1]
ENSOARG00000011005	13.197	3.54857	254.347	82.7938	1.6192	0.00013771	0.018245	C5AR1	complement component 5a receptor 1 [Source:HGNC Symbol;Acc:HGNC:1338]
ENSOARG00000011019	7.70363	23.5868	120.93	429.255	-1.8277	8.2274e-06	0.0023189	CLCF1	cardiotrophin-like cytokine factor 1 [Source:HGNC Symbol;Acc:HGNC:17412]
ENSOARG00000011056	12.7454	37.8369	311.033	1062.49	-1.7723	4.675e-06	0.0014376	IRX5	iroquois homeobox 5 [Source:HGNC Symbol;Acc:HGNC:14361]
ENSOARG00000011239	1.57719	0.100707	39.7574	3.29252	3.594	1.0756e-06	0.00043288	IL7R	interleukin 7 receptor [Source:HGNC Symbol;Acc:HGNC:6024]
ENSOARG00000011320	3.16034	12.8477	33.4095	161.332	-2.2717	6.9751e-07	0.0003081	RPL12	ribosomal protein L12 [Source:HGNC Symbol;Acc:HGNC:10302]
ENSOARG00000011329	1.98537	4.96477	99.5587	292.645	-1.5555	0.00023638	0.024766	TMEM59L	transmembrane protein 59-like [Source:HGNC Symbol;Acc:HGNC:13237]
ENSOARG00000011340	4.69536	1.49779	551.056	202.581	1.4437	0.00028327	0.027832	MMP16	matrix metallopeptidase 16 (membrane-inserted) [Source:HGNC Symbol;Acc:HGNC:7162]
ENSOARG00000011624	4.22934	15.2573	60.601	260.803	-2.1055	0.00031788	0.029634	FAM78B	family with sequence similarity 78, member B [Source:HGNC Symbol;Acc:HGNC:13495]
ENSOARG00000011846	13.14	2.8128	449.337	116.206	1.9511	0.00016893	0.02	NTN4	netrin 4 [Source:HGNC Symbol;Acc:HGNC:13658]
ENSOARG00000011857	8.42983	2.21014	159.957	51.1061	1.6461	0.00015408	0.019035	-	Uncharacterized protein [Source:UniProtKB/TrEMBL;Acc:W5PQJ2]
ENSOARG00000011939	71.6984	9.33309	1016.55	153.951	2.7231	4.8761e-07	0.00023563	PROCR	protein C receptor, endothelial [Source:HGNC Symbol;Acc:HGNC:9452]
ENSOARG00000011967	37.0844	93.9163	665.874	1977.63	-1.5705	2.5835e-05	0.0056123	DBP	D site-binding protein [Source:RefSeq peptide;Acc:NP_001132921]
ENSOARG00000012075	22.5971	5.96632	1688.66	512.743	1.7196	1.236e-05	0.0031471	CDON	cell adhesion associated, oncogene regulated [Source:HGNC Symbol;Acc:HGNC:17104]
ENSOARG00000012259	186.617	61.8919	10395.9	4226.38	1.2985	0.00068289	0.048922	FMO3	flavin containing monooxygenase 3 [Source:HGNC Symbol;Acc:HGNC:3771]
ENSOARG00000012314	5.50221	12.5822	63.9048	174.207	-1.4468	0.00061932	0.045874	EN1	engrailed homeobox 1 [Source:HGNC Symbol;Acc:HGNC:3342]
ENSOARG00000012355	8.59173	2.51517	233.948	80.4444	1.5401	0.00022275	0.024307	WEE1	WEE1 G2 checkpoint kinase [Source:HGNC Symbol;Acc:HGNC:12761]
ENSOARG00000012375	53.7594	111.191	2430.24	5909.61	-1.282	0.00059222	0.045353	MLXIPL	MLX interacting protein-like [Source:HGNC Symbol;Acc:HGNC:12744]
ENSOARG00000012417	1.62616	0.160244	26.7926	2.96528	3.1756	8.7642e-05	0.01297	CD300E	CD300e molecule [Source:HGNC Symbol;Acc:HGNC:28874]
ENSOARG00000012499	1.79278	5.70078	61.1884	226.266	-1.8867	9.9482e-06	0.0026468	ZFPM1	zinc finger protein, FOG family member 1 [Source:HGNC Symbol;Acc:HGNC:19762]
ENSOARG00000012515	3.38274	0.676494	344.644	82.1657	2.0685	7.4329e-07	0.00031429	PCSK5	proprotein convertase subtilisin/kexin type 5 [Source:HGNC Symbol;Acc:HGNC:8747]
ENSOARG00000012584	42.9385	119.325	3962.65	13132.2	-1.7286	6.9486e-06	0.0020827	COL18A1	collagen, type XVIII, alpha 1 [Source:HGNC Symbol;Acc:HGNC:2195]
ENSOARG00000012608	89.3658	217.069	1819.86	5173.84	-1.5074	0.00010024	0.014133	SNRNP70	small nuclear ribonucleoprotein 70kDa (U1) [Source:HGNC Symbol;Acc:HGNC:11150]
ENSOARG00000012805	10.9995	3.50697	836.726	316.226	1.4038	0.00041342	0.034714	TMEM2	transmembrane protein 2 [Source:HGNC Symbol;Acc:HGNC:11869]
ENSOARG00000012964	2.51405	0.563806	58.1277	15.6466	1.8934	0.00059949	0.045353	PTAR1	protein prenyltransferase alpha subunit repeat containing 1 [Source:HGNC Symbol;Acc:HGNC:30449]
ENSOARG00000012971	1.56587	4.23884	155.596	497.385	-1.6766	3.4251e-05	0.0070524	WDR90	WD repeat domain 90 [Source:HGNC Symbol;Acc:HGNC:26960]
ENSOARG00000013018	3.33392	25.4935	14.152	134.837	-3.2521	5.9232e-08	3.7907e-05	S100G	S100 calcium binding protein G [Source:HGNC Symbol;Acc:HGNC:1436]
ENSOARG00000013059	3.37013	14.3239	139.068	709.63	-2.3513	1.7448e-08	1.3328e-05	KIFC2	kinesin family member C2 [Source:HGNC Symbol;Acc:HGNC:29530]
ENSOARG00000013144	27.0784	8.4043	987.262	358.688	1.4607	0.00016604	0.019757	IL1R1	interleukin 1 receptor, type I [Source:HGNC Symbol;Acc:HGNC:5993]
ENSOARG00000013151	20.1709	55.1024	922.758	2952.74	-1.678	1.3975e-05	0.003447	MST1	macrophage stimulating 1 [Source:HGNC Symbol;Acc:HGNC:7380]
ENSOARG00000013193	1.22479	6.32106	42.6009	265.768	-2.6412	6.1185e-07	0.00028408	CPZ	carboxypeptidase Z [Source:HGNC Symbol;Acc:HGNC:2333]
ENSOARG00000013325	16.0095	38.1447	849.022	2358.8	-1.4742	8.8499e-05	0.013016	-	Uncharacterized protein [Source:UniProtKB/TrEMBL;Acc:W5PV02]
ENSOARG00000013346	30.0879	3.16135	188.787	23.9196	2.9805	6.1651e-05	0.010353	CCL24	chemokine (C-C motif) ligand 24 [Source:HGNC Symbol;Acc:HGNC:10623]
ENSOARG00000013352	0.950139	2.64181	34.2187	110.796	-1.6951	0.00035508	0.03197	SLC28A1	solute carrier family 28 (concentrative nucleoside transporter), member 1 [Source:HGNC Symbol;Acc:HGNC:11001]
ENSOARG00000013402	2.83216	0.0629593	57.612	1.46463	5.2978	0.00033854	0.030832	PTGFR	prostaglandin F receptor (FP) [Source:HGNC Symbol;Acc:HGNC:9600]
ENSOARG00000013406	8.10007	2.28114	518.214	176.898	1.5506	0.00058722	0.045353	AFF4	AF4/FMR2 family, member 4 [Source:HGNC Symbol;Acc:HGNC:17869]
ENSOARG00000013494	2.32393	6.24525	44.661	144.663	-1.6956	0.00018549	0.021321	HGFAC	HGF activator [Source:HGNC Symbol;Acc:HGNC:4894]
ENSOARG00000013634	53.5555	131.513	301.661	876.276	-1.5385	7.3217e-05	0.011406	DDTL	D-dopachrome tautomerase-like [Source:HGNC Symbol;Acc:HGNC:33446]
ENSOARG00000013656	57.7039	120.331	741.838	1797.39	-1.2767	0.0005359	0.04244	AKT1 substrate 1	AKT1 substrate 1 (proline-rich) [Source:HGNC Symbol;Acc:HGNC:28426]
ENSOARG00000013741	7.25446	18.5699	206.01	615.805	-1.5798	6.1505e-05	0.010353	HAGHL	hydroxyacylglutathione hydrolase-like [Source:HGNC Symbol;Acc:HGNC:14177]
ENSOARG00000013744	32.6755	72.8205	509.249	1294.22	-1.3456	0.00049911	0.040336	-	Uncharacterized protein [Source:UniProtKB/TrEMBL;Acc:W5PWA6]
ENSOARG00000013752	1.1066	5.39007	14.5252	81.4421	-2.4872	2.1652e-06	0.00078878	NOG	noggin [Source:HGNC Symbol;Acc:HGNC:7866]
ENSOARG00000013979	3.05896	10.3519	46.6537	180.091	-1.9487	6.5979e-05	0.010628	TMEM249	transmembrane protein 249 [Source:HGNC Symbol;Acc:HGNC:44155]
ENSOARG00000014195	2.2226	0.0736851	46.2585	1.80581	4.679	3.1771e-09	3.4196e-06	TMEFF2	transmembrane protein with EGF-like and two follistatin-like domains 2 [Source:HGNC Symbol;Acc:HGNC:11867]
ENSOARG00000014260	1.99506	0.251851	37.5448	5.76789	2.7025	0.00062189	0.045874	CCR1	chemokine (C-C motif) receptor 1 [Source:HGNC Symbol;Acc:HGNC:1602]
ENSOARG00000014330	3.98892	0.967786	361.577	107.585	1.7488	0.00055592	0.043588	ADAMTSL3	ADAMTS-like 3 [Source:HGNC Symbol;Acc:HGNC:14633]
ENSOARG00000014344	2.32626	5.1188	216.17	547.622	-1.341	0.00062024	0.045874	SPATA2L	spermatogenesis associated 2-like [Source:HGNC Symbol;Acc:HGNC:28393]
ENSOARG00000014364	11.0909	1.7143	225.29	39.9091	2.497	2.0047e-08	1.4385e-05
ENSOARG00000014433	0.704269	2.51222	30.9002	132.499	-2.1003	8.1949e-06	0.0023189	PKD2L1	polycystic kidney disease 2-like 1 [Source:HGNC Symbol;Acc:HGNC:9011]
ENSOARG00000014486	6.71186	1.56866	201.207	56.0836	1.843	2.0065e-05	0.0046129	-	Uncharacterized protein [Source:UniProtKB/TrEMBL;Acc:W5PYK8]
ENSOARG00000014577	8.55856	26.7592	95.5059	345.355	-1.8544	7.6671e-06	0.0022413	IZUMO4	IZUMO family member 4 [Source:HGNC Symbol;Acc:HGNC:26950]
ENSOARG00000014590	0.696586	48.4584	12.6319	972.934	-6.2672	2.2829e-19	9.0093e-16	CRYM	crystallin, mu [Source:HGNC Symbol;Acc:HGNC:2418]
ENSOARG00000014765	1.54346	5.38784	132.059	544.383	-2.0434	0.00017551	0.020574	KIAA1875	KIAA1875 [Source:HGNC Symbol;Acc:HGNC:26959]
ENSOARG00000014900	0.498998	2.07895	27.2014	131.78	-2.2764	0.00012951	0.017326	CCDC154	coiled-coil domain containing 154 [Source:HGNC Symbol;Acc:HGNC:34454]
ENSOARG00000014939	321.803	783.489	4319.84	11857.1	-1.4567	7.787e-05	0.011845	CLDN15	claudin 15 [Source:HGNC Symbol;Acc:HGNC:2036]
ENSOARG00000015025	4.83372	1.44471	255.666	89.6221	1.5123	0.00039876	0.033852	CBL	Cbl proto-oncogene, E3 ubiquitin protein ligase [Source:HGNC Symbol;Acc:HGNC:1541]
ENSOARG00000015276	3.69662	0.376561	25.9876	3.29717	2.9785	0.00024722	0.025645	-	Uncharacterized protein [Source:UniProtKB/TrEMBL;Acc:W5Q103]
ENSOARG00000015346	14.8234	3.54096	253.044	71.3777	1.8258	3.6488e-05	0.0073845	UBXN2B	UBX domain protein 2B [Source:HGNC Symbol;Acc:HGNC:27035]
ENSOARG00000015564	3.61011	0.688998	171.546	37.7883	2.1826	0.00015434	0.019035	LRRC8B	leucine rich repeat containing 8 family, member B [Source:HGNC Symbol;Acc:HGNC:30692]
ENSOARG00000015581	3.97726	8.74906	214.451	550.637	-1.3605	0.00058093	0.045101	PARP10	poly (ADP-ribose) polymerase family, member 10 [Source:HGNC Symbol;Acc:HGNC:25895]
ENSOARG00000015582	9.38672	2.7727	576.578	205.11	1.4911	0.00015964	0.01937	TBC1D4	TBC1 domain family, member 4 [Source:HGNC Symbol;Acc:HGNC:19165]
ENSOARG00000015646	106.615	33.7815	977.642	366.398	1.4159	0.00029866	0.028632	-	Beta-2-microglobulin [Source:UniProtKB/TrEMBL;Acc:W5Q244]
ENSOARG00000015936	8.03745	2.49795	583.155	213.945	1.4466	0.00029284	0.028536	UGGT1	UDP-glucose glycoprotein glucosyltransferase 1 [Source:HGNC Symbol;Acc:HGNC:15663]
ENSOARG00000015985	9.24132	2.43285	188.022	58.8841	1.675	0.00015226	0.019035	AMMECR1L	AMMECR1-like [Source:HGNC Symbol;Acc:HGNC:28658]
ENSOARG00000016017	9.27287	2.8147	447.843	163.287	1.4556	0.00029442	0.028572	PDE5A	phosphodiesterase 5A, cGMP-specific [Source:HGNC Symbol;Acc:HGNC:8784]
ENSOARG00000016115	2.03407	0.325703	50.8936	9.19635	2.4684	4.4316e-05	0.0084625	SYT9	synaptotagmin IX [Source:HGNC Symbol;Acc:HGNC:19265]
ENSOARG00000016133	1.63292	0.416534	107.462	33.0727	1.7001	0.00028478	0.027865	NCKAP1L	NCK-associated protein 1-like [Source:HGNC Symbol;Acc:HGNC:4862]
ENSOARG00000016134	6.83531	14.7699	116.699	298.629	-1.3556	0.00068387	0.048922	KCNK7	potassium channel, two pore domain subfamily K, member 7 [Source:HGNC Symbol;Acc:HGNC:6282]
ENSOARG00000016153	10.6466	2.92937	348.625	114.2	1.6101	5.7589e-05	0.010027	CPE	carboxypeptidase E [Source:HGNC Symbol;Acc:HGNC:2303]
ENSOARG00000016257	5.77612	1.91094	489.746	182.93	1.4207	0.00030233	0.028751	-	MHC class II DQA; Uncharacterized protein [Source:UniProtKB/TrEMBL;Acc:W1IAM8]
ENSOARG00000016271	5.49363	1.0203	68.4121	15.1788	2.1722	6.5928e-05	0.010628	HOXC4	homeobox C4 [Source:HGNC Symbol;Acc:HGNC:5126]
ENSOARG00000016282	9.02107	25.3136	598.102	1947.48	-1.7031	1.6457e-05	0.0039763	DGKQ	diacylglycerol kinase, theta 110kDa [Source:HGNC Symbol;Acc:HGNC:2856]
ENSOARG00000016319	1.25265	31.8632	17.9679	556.178	-4.9521	3.359e-12	6.1183e-09	HOXC9	homeobox C9 [Source:HGNC Symbol;Acc:HGNC:5130]
ENSOARG00000016331	0.0318147	10.9546	0.67943	241.076	-8.4709	8.053e-33	6.3562e-29	HOXC10	homeobox C10 [Source:HGNC Symbol;Acc:HGNC:5122]
ENSOARG00000016342	0	2.15453	0	43.8325	#NAME?	1.3274e-13	3.1432e-10	HOXC11	homeobox C11 [Source:HGNC Symbol;Acc:HGNC:5123]
ENSOARG00000016352	0.0197672	2.42499	0.339715	42.5505	-6.9687	3.0659e-08	2.1352e-05	HOXC12	homeobox C12 [Source:HGNC Symbol;Acc:HGNC:5124]
ENSOARG00000016363	0.0355396	1.09751	0.541336	21.3038	-5.2984	2.3055e-06	0.0008148	HOXC13	homeobox C13 [Source:HGNC Symbol;Acc:HGNC:5125]
ENSOARG00000016425	1.31182	5.29881	7.69127	36.1492	-2.2327	0.00058945	0.045353	NPFF	neuropeptide FF-amide peptide precursor [Source:HGNC Symbol;Acc:HGNC:7901]
ENSOARG00000016547	9.67503	2.22642	274.423	75.8832	1.8545	6.3053e-05	0.010441	CALCRL	calcitonin receptor-like [Source:HGNC Symbol;Acc:HGNC:16709]
ENSOARG00000016570	44.3291	14.3126	2105.83	826.592	1.3491	0.00059923	0.045353	IL13RA1	interleukin 13 receptor, alpha 1 [Source:HGNC Symbol;Acc:HGNC:5974]
ENSOARG00000016636	8.56313	19.3911	282.546	781.367	-1.4675	0.00022497	0.024328	FBXO24	F-box protein 24 [Source:HGNC Symbol;Acc:HGNC:13595]
ENSOARG00000016764	12.2661	97.2741	281.434	2539.04	-3.1734	8.4982e-05	0.012736	FRZB	frizzled-related protein [Source:HGNC Symbol;Acc:HGNC:3959]
ENSOARG00000016771	158.027	389.234	4272.99	12130.7	-1.5053	7.0262e-05	0.011092	-	Uncharacterized protein [Source:UniProtKB/TrEMBL;Acc:W5Q5L8]
ENSOARG00000016862	81.3976	188.236	253.91	701.441	-1.466	0.00031585	0.029634	COX14	COX14 cytochrome c oxidase assembly factor [Source:HGNC Symbol;Acc:HGNC:28216]
ENSOARG00000016870	0.679924	2.98518	21.4089	114.741	-2.4221	8.5729e-05	0.012767	SLC7A4	solute carrier family 7, member 4 [Source:HGNC Symbol;Acc:HGNC:11062]
ENSOARG00000016888	3.46455	0.617793	317.115	67.9411	2.2227	0.00022706	0.024328	IQGAP2	IQ motif containing GTPase activating protein 2 [Source:HGNC Symbol;Acc:HGNC:6111]
ENSOARG00000016893	4.23503	1.27283	415.35	150.092	1.4685	0.00022027	0.024147	QSER1	glutamine and serine rich 1 [Source:HGNC Symbol;Acc:HGNC:26154]
ENSOARG00000016899	2.851	0.273852	159.57	18.5382	3.1056	7.3323e-07	0.00031429	TMEM132C	transmembrane protein 132C [Source:HGNC Symbol;Acc:HGNC:25436]
ENSOARG00000016918	63.8797	10.4383	1327.54	263.238	2.3343	6.1428e-05	0.010353	F2RL2	coagulation factor II (thrombin) receptor-like 2 [Source:HGNC Symbol;Acc:HGNC:3539]
ENSOARG00000016957	6.42054	1.83907	403.974	137.9	1.5506	0.00016428	0.019646	N4BP1	NEDD4 binding protein 1 [Source:HGNC Symbol;Acc:HGNC:29850]
ENSOARG00000017049	0.432626	2.81525	13.224	97.1561	-2.8772	3.5068e-08	2.3066e-05	-	Uncharacterized protein [Source:UniProtKB/TrEMBL;Acc:W5Q6G0]
ENSOARG00000017085	2.83033	6.92846	125.847	354.481	-1.494	0.00026795	0.026772	MED15	mediator complex subunit 15 [Source:HGNC Symbol;Acc:HGNC:14248]
ENSOARG00000017397	56.7882	17.1351	1886.23	689.576	1.4517	0.00018093	0.020899	RHOBTB3	Rho-related BTB domain containing 3 [Source:HGNC Symbol;Acc:HGNC:18757]
ENSOARG00000017439	6.04699	1.13761	183.247	42.0379	2.124	1.9067e-05	0.0044703	-	Uncharacterized protein [Source:UniProtKB/TrEMBL;Acc:W5Q7N0]
ENSOARG00000017511	2.23554	0.392158	162.699	34.8486	2.223	1.4363e-06	0.00055755	-	Uncharacterized protein [Source:UniProtKB/TrEMBL;Acc:W5Q7V3]
ENSOARG00000017529	4.95033	1.51949	297.272	112.606	1.4005	0.00055077	0.043328	CRYBG3	beta-gamma crystallin domain containing 3 [Source:HGNC Symbol;Acc:HGNC:34427]
ENSOARG00000017540	3.60971	1.11839	303.532	113.326	1.4214	0.00069425	0.049367	DIP2B	disco-interacting protein 2 homolog B [Source:HGNC Symbol;Acc:HGNC:29284]
ENSOARG00000017739	7.42668	0.110249	293.935	5.22033	5.8152	8.3475e-06	0.0023189	CAPN6	calpain 6 [Source:HGNC Symbol;Acc:HGNC:1483]
ENSOARG00000017769	8.73102	34.6143	104.966	494.786	-2.2369	7.1041e-08	4.3133e-05	CITED1	Cbp/p300-interacting transactivator, with Glu/Asp-rich carboxy-terminal domain, 1 [Source:HGNC Symbol;Acc:HGNC:1986]
ENSOARG00000017807	5.15478	1.40138	265.945	85.8401	1.6314	0.00011113	0.015299	ERAP1	endoplasmic reticulum aminopeptidase 1 [Source:HGNC Symbol;Acc:HGNC:18173]
ENSOARG00000017906	33.869	80.6126	1097.47	2994.44	-1.4481	0.00013869	0.018245	PCYT2	phosphate cytidylyltransferase 2, ethanolamine [Source:HGNC Symbol;Acc:HGNC:8756]
ENSOARG00000017964	63.8835	234.917	1645.5	7111.83	-2.1117	3.2938e-05	0.0068416	IRX3	iroquois homeobox 3 [Source:HGNC Symbol;Acc:HGNC:14360]
ENSOARG00000018337	1.62582	0.0613119	141.073	5.71137	4.6265	1.6438e-09	2.1171e-06	CPAMD8	C3 and PZP-like, alpha-2-macroglobulin domain containing 8 [Source:HGNC Symbol;Acc:HGNC:23228]
ENSOARG00000018341	377.236	38.714	1277.69	154.724	3.0458	3.6858e-11	6.2341e-08	-	Metallothionein-1A [Source:UniProtKB/Swiss-Prot;Acc:P67982]
ENSOARG00000018343	985.071	202.512	3442.18	802.571	2.1006	0.00010015	0.014133	-	Metallothionein-2 [Source:UniProtKB/Swiss-Prot;Acc:P68302]
ENSOARG00000018445	39.8986	6.5013	1708.58	325.04	2.3941	0.00039203	0.033564	F13A1	coagulation factor XIII, A1 polypeptide [Source:HGNC Symbol;Acc:HGNC:3531]
ENSOARG00000018488	1.7074	4.98735	40.2665	136.959	-1.7661	0.00017754	0.020709	C16orf59	chromosome 16 open reading frame 59 [Source:HGNC Symbol;Acc:HGNC:25849]
ENSOARG00000018681	175.378	396.306	2680.23	7003.75	-1.3858	0.00020144	0.02229	PRKCDBP	protein kinase C, delta binding protein [Source:HGNC Symbol;Acc:HGNC:9400]
ENSOARG00000018775	3.65881	1.01139	194.44	65.5916	1.5677	0.0002326	0.024588	CBLB	Cbl proto-oncogene B, E3 ubiquitin protein ligase [Source:HGNC Symbol;Acc:HGNC:1542]
ENSOARG00000018871	61.7481	16.7412	1543.14	506.977	1.6059	0.00033345	0.030717	CD47	CD47 molecule [Source:HGNC Symbol;Acc:HGNC:1682]
ENSOARG00000018872	126.665	311.736	962.956	2754.88	-1.5164	5.684e-05	0.0099698	-	Uncharacterized protein [Source:UniProtKB/TrEMBL;Acc:W5QC24]
ENSOARG00000018960	9.07946	2.67323	754.715	265.272	1.5085	0.00014714	0.018833	RALGAPB	Ral GTPase activating protein, beta subunit (non-catalytic) [Source:HGNC Symbol;Acc:HGNC:29221]
ENSOARG00000019031	3.08043	8.06234	59.8644	182.845	-1.6108	0.00015893	0.01937	A4GALT	alpha 1,4-galactosyltransferase [Source:HGNC Symbol;Acc:HGNC:18149]
ENSOARG00000019331	3.4645	8.74446	252.52	752.936	-1.5761	5.8582e-05	0.010125	SLC22A17	solute carrier family 22, member 17 [Source:HGNC Symbol;Acc:HGNC:23095]
ENSOARG00000019347	0.913778	0.0967773	29.7754	3.42845	3.1185	0.00062667	0.045941	NGEF	neuronal guanine nucleotide exchange factor [Source:HGNC Symbol;Acc:HGNC:7807]
ENSOARG00000019463	2.88909	0.63896	310.813	81.0531	1.9391	3.4569e-06	0.001129	CD53	CD53 molecule [Source:RefSeq peptide;Acc:NP_001269176]
ENSOARG00000019468	1.52059	0.36805	185.803	54.1598	1.7785	6.9804e-05	0.011092	KIAA2018	KIAA2018 [Source:HGNC Symbol;Acc:HGNC:30494]
ENSOARG00000019564	7.06759	1.89131	370.022	121.128	1.6111	0.00010662	0.014851	TMTC1	transmembrane and tetratricopeptide repeat containing 1 [Source:HGNC Symbol;Acc:HGNC:24099]
ENSOARG00000019591	7.7588	2.24034	362.429	123.431	1.554	0.00017021	0.020052	AGO1	argonaute RISC catalytic component 1 [Source:HGNC Symbol;Acc:HGNC:3262]
ENSOARG00000019752	20.6178	48.6413	417.529	1141.38	-1.4508	0.00014661	0.018833	-	Uncharacterized protein [Source:UniProtKB/TrEMBL;Acc:W5QER6]
ENSOARG00000019756	9.12015	20.1297	723.013	1851.65	-1.3567	0.00042916	0.035656	TUBGCP6	tubulin, gamma complex associated protein 6 [Source:HGNC Symbol;Acc:HGNC:18127]
ENSOARG00000019780	16.3778	35.5631	604.36	1523.71	-1.3341	0.00048454	0.039564	HDAC10	histone deacetylase 10 [Source:HGNC Symbol;Acc:HGNC:18128]
ENSOARG00000019799	12.4377	27.7959	364.905	941.415	-1.3673	0.00060166	0.045371	MAPK12	mitogen-activated protein kinase 12 [Source:HGNC Symbol;Acc:HGNC:6874]
ENSOARG00000019817	0.0751538	0.68396	2.25131	24.1858	-3.4253	0.00035488	0.03197	NR1I2	nuclear receptor subfamily 1, group I, member 2 [Source:HGNC Symbol;Acc:HGNC:7968]
ENSOARG00000019840	2.58488	0.334795	48.861	7.08073	2.7867	1.0554e-05	0.0027767	PTAFR	platelet-activating factor receptor [Source:HGNC Symbol;Acc:HGNC:9582]
ENSOARG00000019936	10.4754	3.25162	693.465	257.485	1.4293	0.00034249	0.031072	HIPK1	homeodomain interacting protein kinase 1 [Source:HGNC Symbol;Acc:HGNC:19006]
ENSOARG00000020030	6.48566	1.63817	154.868	46.807	1.7262	0.00010028	0.014133	SPRED1	sprouty-related, EVH1 domain containing 1 [Source:HGNC Symbol;Acc:HGNC:20249]
ENSOARG00000020045	4.10534	0.781091	229.891	53.2088	2.1112	2.5441e-06	0.0008859	-	Uncharacterized protein [Source:UniProtKB/TrEMBL;Acc:W5QFM3]
ENSOARG00000020112	2.28499	0.326571	52.8596	8.96629	2.5596	2.3524e-05	0.0052057	CD86	CD86 molecule [Source:HGNC Symbol;Acc:HGNC:1705]
ENSOARG00000020186	8.74925	22.8695	518.545	1575.69	-1.6034	3.8588e-05	0.0075579	ADCY5	adenylate cyclase 5 [Source:HGNC Symbol;Acc:HGNC:236]
ENSOARG00000020233	30.6031	7.28413	1473.9	416.338	1.8238	3.5813e-06	0.001146	HEG1	heart development protein with EGF-like domains 1 [Source:HGNC Symbol;Acc:HGNC:29227]
ENSOARG00000020262	80.6387	196.88	580.739	1657.46	-1.513	7.3924e-05	0.011441	H2AFJ	H2A histone family, member J [Source:HGNC Symbol;Acc:HGNC:14456]
ENSOARG00000020393	1.77494	0.439114	70.9061	19.8589	1.8361	0.00036964	0.03266	-	Lysozyme [Source:UniProtKB/TrEMBL;Acc:W5QGQ0]
ENSOARG00000020761	1.43295	0.350119	104.814	30.8068	1.7665	0.00024876	0.025645	TNIK	TRAF2 and NCK interacting kinase [Source:HGNC Symbol;Acc:HGNC:30765]
ENSOARG00000020763	1.53897	5.34473	94.551	400.971	-2.0843	5.973e-06	0.0018133	GUCY2C	guanylate cyclase 2C [Source:HGNC Symbol;Acc:HGNC:4688]
ENSOARG00000020788	20.1085	5.71231	213.701	72.2398	1.5647	0.00042478	0.035417	RAB8B	RAB8B, member RAS oncogene family [Source:HGNC Symbol;Acc:HGNC:30273]
ENSOARG00000020838	9.09428	0.418384	246.81	12.5167	4.3015	4.5917e-05	0.0085612	GPRC5A	G protein-coupled receptor, class C, group 5, member A [Source:HGNC Symbol;Acc:HGNC:9836]
ENSOARG00000020861	15.1447	4.39815	1297.93	459.905	1.4968	7.8038e-05	0.011845	CTSS	cathepsin S [Source:HGNC Symbol;Acc:HGNC:2545]
ENSOARG00000021060	2.49145	6.73102	75.6886	236.243	-1.6421	0.00013849	0.018245	RORC	RAR-related orphan receptor C [Source:HGNC Symbol;Acc:HGNC:10260]
ENSOARG00000021090	1.90472	0.198298	151.538	18.9077	3.0026	9.786e-10	1.3631e-06	-	Uncharacterized protein [Source:UniProtKB/TrEMBL;Acc:W5QIW3]
ENSOARG00000021214	0	11.2152	0	23.8183	#NAME?	1.1124e-08	9.7554e-06	HOTAIR_3	HOTAIR conserved region 3 [Source:RFAM;Acc:RF01906]
ENSOARG00000021254	0	20.9161	0	30.0067	#NAME?	2.6984e-10	4.2597e-07	HOTAIR_2	HOTAIR conserved region 2 [Source:RFAM;Acc:RF01905]
ENSOARG00000022840	46.5559	131.102	239.762	791.544	-1.7231	1.1661e-05	0.0030013	RNase_MRP	RNase MRP [Source:RFAM;Acc:RF00030]
ENSOARG00000022982	5.61468	15.4987	33.0148	109.063	-1.724	0.00027958	0.027584	snoU85	Small nucleolar RNA U85 [Source:RFAM;Acc:RF01296]
ENSOARG00000023536	41.4278	5.54675	76.7353	11.2868	2.7653	0.00027352	0.027213	HOTAIRM1_4	HOX antisense intergenic RNA myeloid 1 conserved region 4 [Source:RFAM;Acc:RF01978]
ENSOARG00000024340	8.69458	28.1203	47.6727	180.923	-1.9241	1.4738e-05	0.0035977	Metazoa_SRP	Metazoan signal recognition particle RNA [Source:RFAM;Acc:RF00017]
ENSOARG00000025180	62.3793	16.238	1263.01	394.049	1.6804	1.8069e-05	0.0042786	CD14	monocyte differentiation antigen CD14 precursor [Source:RefSeq peptide;Acc:NP_001070677]
ENSOARG00000025450	2.26413	6.57667	142.564	498.373	-1.8056	8.422e-06	0.0023189
ENSOARG00000025492	0.590345	2.02093	19.9469	77.8692	-1.9649	0.00023106	0.024588
ENSOARG00000025715	0.133068	0.824429	4.49122	33.1766	-2.885	0.00014168	0.018534
ENSOARG00000025928	11.3221	27.9838	185.856	533.514	-1.5213	0.00014708	0.018833
ENSOARG00000026129	0.791984	2.60925	49.4298	191.889	-1.9568	9.8983e-06	0.0026468
ENSOARG00000026132	1.20545	2.94189	72.9216	209.587	-1.5231	0.00038752	0.033368
ENSOARG00000026371	10.5729	2.76167	169.874	51.9055	1.7105	9.3628e-05	0.013601
ENSOARG00000026619	8.72831	21.0175	178.383	493.861	-1.4691	0.0002491	0.025645
ENSOARG00000026826	7.59542	17.5944	84.431	225.241	-1.4156	0.00066046	0.047973
Novel00089	0.85336	0.144257	66.9466	12.8549	2.3807	0.00015621	0.019166
Novel00187	0.00653975	1.12574	0.287588	67.4238	-7.8731	1.1568e-05	0.0030013
Novel00277	6.66768	15.9766	70.3346	200.217	-1.5093	0.00033473	0.030717
Novel00793	1.09562	0.165989	106.412	18.5461	2.5205	4.1657e-07	0.00020987
Novel00956	2.7871	8.68024	37.6025	142.469	-1.9217	3.7892e-05	0.0075579
Novel01039	4.28772	9.74052	149.995	398.89	-1.4111	0.00059324	0.045353
Novel01182	0	2.08519	0	178.134	#NAME?	6.4356e-09	5.9107e-06
Novel01322	4.52709	0.0643832	336.289	5.826	5.8511	1.3391e-08	1.057e-05
Novel01381	1.53075	4.63856	47.3662	168.444	-1.8303	3.4894e-05	0.0071228
Novel01686	0.0114723	4.38038	0.67943	261.398	-8.5877	4.54e-34	5.3752e-30
Novel01871	0	1.4379	0	60.8587	#NAME?	2.4455e-07	0.00013467	--	FAER314Wp [Ashbya gossypii FDAG1]
Novel01918	0.0341035	1.28259	2.06382	93.7883	-5.506	1.4228e-12	2.8076e-09
Novel01920	0.882818	0.209442	123.453	35.6813	1.7907	0.00012868	0.017326
Novel02083	16.4726	38.3642	157.309	430.343	-1.4519	0.00026569	0.026658
Novel02112	17.2476	39.2183	289.694	774.882	-1.4194	0.00031976	0.029692
Novel02141	0.166926	0.867177	6.92445	43.0189	-2.6352	0.00051918	0.041673
Novel02225	0.464016	2.88414	12.6423	99.7232	-2.9797	1.2581e-06	0.00049652
Novel02254	0.414219	6.6517	34.8974	685.831	-4.2967	7.5284e-21	3.5653e-17
Novel02255	0.25778	4.4517	6.91031	140.545	-4.3461	1.8855e-15	6.3782e-12
Novel02256	0.259993	1.86658	13.5389	119.654	-3.1437	1.6987e-09	2.1171e-06
Novel02257	0.205101	1.00862	15.2447	91.0926	-2.579	1.6214e-06	0.00061924
Novel02437	1.37353	3.97051	30.4548	106.476	-1.8058	0.00059497	0.045353
Novel02490	16.1648	55.3794	252.401	1007.51	-1.997	0.00060549	0.045371

## Sheet: VAT vs. TAT
Gene_ID	FPKM_VAT	FPKM_TAT	ReadCount_VAT	ReadCount_TAT	log2FoldChange	p-value	FDR	Gene_Symbol	Description
ENSOARG00000000033	710.314	2223.65	6722.82	25879.9	-1.9447	3.6246e-07	7.2579e-05	ND6	NADH-ubiquinone oxidoreductase chain 6 [Source:UniProtKB/Swiss-Prot;Acc:O78757]
ENSOARG00000000042	2.02267	0	137.607	0	Inf	0.00010971	0.0063488	CYP2E1	cytochrome P450, family 2, subfamily E, polypeptide 1 [Source:HGNC Symbol;Acc:HGNC:2631]
ENSOARG00000000058	54.6739	15.1594	227.336	75.4156	1.5919	0.00017897	0.0093101	-	Uncharacterized protein [Source:UniProtKB/TrEMBL;Acc:W5NPE8]
ENSOARG00000000070	1.4843	0.0947478	23.242	1.96007	3.5678	5.8748e-05	0.0040143	-	Uncharacterized protein [Source:UniProtKB/TrEMBL;Acc:W5NPF8]
ENSOARG00000000085	2.8138	0.468327	140.467	28.3551	2.3086	7.968e-07	0.00013573	ARHGAP28	Rho GTPase activating protein 28 [Source:HGNC Symbol;Acc:HGNC:25509]
ENSOARG00000000123	22.9223	7.34213	652.765	258.856	1.3344	0.00066631	0.024796	CX3CL1	chemokine (C-X3-C motif) ligand 1 [Source:HGNC Symbol;Acc:HGNC:10647]
ENSOARG00000000155	5.21938	0.988483	126.748	29.0026	2.1277	0.00050088	0.019993	CPM	carboxypeptidase M [Source:HGNC Symbol;Acc:HGNC:2311]
ENSOARG00000000158	13.952	3.46705	559.389	172.094	1.7007	0.00061146	0.023477	EDNRB	endothelin receptor type B [Source:HGNC Symbol;Acc:HGNC:3180]
ENSOARG00000000276	15.6206	4.62502	376.23	137.931	1.4477	0.00042061	0.017664	WIPF1	WAS/WASL interacting protein family, member 1 [Source:HGNC Symbol;Acc:HGNC:12736]
ENSOARG00000000322	8.21981	20.0723	274.363	832.155	-1.6008	0.00013809	0.0076903	MIEF2	mitochondrial elongation factor 2 [Source:HGNC Symbol;Acc:HGNC:17920]
ENSOARG00000000344	6.38062	1.2416	623.221	148.053	2.0736	2.5943e-07	5.7048e-05	PLXDC2	plexin domain containing 2 [Source:HGNC Symbol;Acc:HGNC:21013]
ENSOARG00000000405	2.57436	0.698151	172.955	55.6396	1.6362	0.00025267	0.012055	PPP1R16B	protein phosphatase 1, regulatory subunit 16B [Source:HGNC Symbol;Acc:HGNC:15850]
ENSOARG00000000417	4.34284	33.5685	31.2428	283.521	-3.1819	2.8655e-05	0.0023104	S100A9	S100 calcium binding protein A9 [Source:HGNC Symbol;Acc:HGNC:10499]
ENSOARG00000000427	0	2.83614	0	41.0771	#NAME?	1.2349e-05	0.0011997	-//-
ENSOARG00000000431	0.316993	0.955727	20.8152	75.4728	-1.8583	0.0002534	0.012066	-	Uncharacterized protein [Source:UniProtKB/TrEMBL;Acc:W5NQI8]
ENSOARG00000000450	3.11367	113.266	16.477	692.266	-5.3928	0.0014065	0.043284	S100A8	S100 calcium binding protein A8 [Source:HGNC Symbol;Acc:HGNC:10498]
ENSOARG00000000571	4.54954	0.656786	46.823	8.72984	2.4232	6.9819e-05	0.0045399	RHOH	ras homolog family member H [Source:HGNC Symbol;Acc:HGNC:686]
ENSOARG00000000620	2.26092	5.36555	49.0527	142.646	-1.54	0.00048786	0.019538	CCDC85C	coiled-coil domain containing 85C [Source:HGNC Symbol;Acc:HGNC:35459]
ENSOARG00000000644	3.67133	9.62866	115.882	373.769	-1.6895	2.2583e-05	0.0019033	FAM83D	family with sequence similarity 83, member D [Source:HGNC Symbol;Acc:HGNC:16122]
ENSOARG00000000780	69.5343	130.331	1136.29	2644.05	-1.2184	0.0012349	0.03967	SLC2A4RG	SLC2A4 regulator [Source:HGNC Symbol;Acc:HGNC:15930]
ENSOARG00000000810	3.81314	0.831094	361.781	95.2749	1.9249	3.559e-06	0.00042618	NHSL1	NHS-like 1 [Source:HGNC Symbol;Acc:HGNC:21021]
ENSOARG00000000890	272.751	92.453	3706.96	1541.07	1.2663	0.00088491	0.030693	-//-
ENSOARG00000000950	81.049	17.5491	6530.76	1809.74	1.8515	7.4581e-06	0.00078437	A2M	alpha-2-macroglobulin [Source:HGNC Symbol;Acc:HGNC:7]
ENSOARG00000001060	38.973	12.927	2872.83	1153.26	1.3167	0.00034766	0.015233	KDR	kinase insert domain receptor [Source:HGNC Symbol;Acc:HGNC:6307]
ENSOARG00000001094	8.97	0.947296	189.08	23.8397	2.9876	0.00041252	0.017445	ADRB3	beta-3 adrenergic receptor [Source:RefSeq peptide;Acc:NP_001153229]
ENSOARG00000001138	1.56368	0.403233	84.796	27.2995	1.6351	0.0011063	0.03631	HERC6	HECT and RLD domain containing E3 ubiquitin protein ligase family member 6 [Source:HGNC Symbol;Acc:HGNC:26072]
ENSOARG00000001158	14.9647	2.82865	209.146	49.0681	2.0917	0.00012893	0.0072528	LAT	linker for activation of T cells [Source:HGNC Symbol;Acc:HGNC:18874]
ENSOARG00000001159	58.9666	107.937	2186.78	4914.24	-1.1682	0.0013224	0.041657	MMP15	matrix metallopeptidase 15 (membrane-inserted) [Source:HGNC Symbol;Acc:HGNC:7161]
ENSOARG00000001170	15.9714	4.92929	1692.28	632.966	1.4188	0.00018277	0.0094339	LTBP2	latent transforming growth factor beta binding protein 2 [Source:HGNC Symbol;Acc:HGNC:6715]
ENSOARG00000001202	48.6626	11.2021	1721.49	490.106	1.8125	1.9413e-06	0.00028119	PLK3	polo-like kinase 3 [Source:HGNC Symbol;Acc:HGNC:2154]
ENSOARG00000001219	1.27224	3.09632	68.9933	205.876	-1.5772	0.0001606	0.008538	TXLNB	taxilin beta [Source:HGNC Symbol;Acc:HGNC:21617]
ENSOARG00000001254	69.6986	22.431	16049.3	6233.32	1.3644	0.0016427	0.048046	TNXB	tenascin XB [Source:HGNC Symbol;Acc:HGNC:11976]
ENSOARG00000001264	31.503	76.816	2022.78	6008.79	-1.5707	2.5662e-05	0.0021114	-	Uncharacterized protein [Source:UniProtKB/TrEMBL;Acc:W5NT28]
ENSOARG00000001394	7.21664	16.4541	69.0949	194.143	-1.4905	0.00038985	0.016809	GCSH	glycine cleavage system protein H (aminomethyl carrier) [Source:HGNC Symbol;Acc:HGNC:4208]
ENSOARG00000001397	2.10986	0.278213	143.183	22.292	2.6833	3.46e-08	1.1159e-05	ADGRG6	adhesion G protein-coupled receptor G6 [Source:HGNC Symbol;Acc:HGNC:13841]
ENSOARG00000001444	2.90006	7.05788	62.2244	182.503	-1.5524	0.00042785	0.017937	-	Uncharacterized protein [Source:UniProtKB/TrEMBL;Acc:W5NTL2]
ENSOARG00000001456	88.3706	16.2013	3753.4	820.964	2.1928	0.00019057	0.0097872	GFPT2	glutamine-fructose-6-phosphate transaminase 2 [Source:HGNC Symbol;Acc:HGNC:4242]
ENSOARG00000001465	2.9439	0.359491	61.2515	9.02547	2.7627	2.554e-06	0.00034132	-	Uncharacterized protein [Source:UniProtKB/TrEMBL;Acc:W5NTM9]
ENSOARG00000001487	0.101335	2.24944	1.91015	51.3455	-4.7485	1.8559e-10	1.6033e-07	ISL2	ISL LIM homeobox 2 [Source:HGNC Symbol;Acc:HGNC:18524]
ENSOARG00000001497	6.2494	1.60395	295.731	89.588	1.7229	2.9266e-05	0.0023441	TES	testin LIM domain protein [Source:HGNC Symbol;Acc:HGNC:14620]
ENSOARG00000001504	56.9886	130.733	3281.8	9434.22	-1.5234	0.0007874	0.028175	SREBF1	sterol regulatory element binding transcription factor 1 [Source:HGNC Symbol;Acc:HGNC:11289]
ENSOARG00000001509	6.94186	1.8564	431.428	142.978	1.5933	0.00017147	0.0089779	ARHGAP4	Rho GTPase activating protein 4 [Source:HGNC Symbol;Acc:HGNC:674]
ENSOARG00000001516	49.9764	119.649	1249.12	3623.53	-1.5365	4.6854e-05	0.0033731	SERINC2	serine incorporator 2 [Source:HGNC Symbol;Acc:HGNC:23231]
ENSOARG00000001535	2.86633	0.643891	73.9657	20.7662	1.8326	0.0003246	0.014567	-	Uncharacterized protein [Source:UniProtKB/TrEMBL;Acc:W5NTV9]
ENSOARG00000001568	14.1329	2.32345	881.786	168.516	2.3875	3.7599e-09	2.061e-06	-	Uncharacterized protein [Source:UniProtKB/TrEMBL;Acc:W5NU00]
ENSOARG00000001574	25.9173	4.11715	230.671	45.6039	2.3386	0.00065575	0.024546	BTG2	protein BTG2 [Source:RefSeq peptide;Acc:NP_001233139]
ENSOARG00000001579	2.38089	0.435941	36.9544	8.80364	2.0696	0.0015699	0.046554	-	Uncharacterized protein [Source:UniProtKB/TrEMBL;Acc:W5NU09]
ENSOARG00000001589	8.22801	1.15049	151.391	26.0705	2.5378	1.4383e-06	0.00022179	-	Uncharacterized protein [Source:UniProtKB/TrEMBL;Acc:W5NU18]
ENSOARG00000001634	16.9402	2.68763	547.596	109.023	2.3285	1.7909e-08	6.8997e-06	PHACTR2	phosphatase and actin regulator 2 [Source:HGNC Symbol;Acc:HGNC:20956]
ENSOARG00000001645	5.79419	0.742508	95.254	14.8787	2.6785	0.00038812	0.016765	-	Uncharacterized protein [Source:UniProtKB/TrEMBL;Acc:W5NU82]
ENSOARG00000001650	27.6313	9.03117	623.127	245.893	1.3415	0.00064431	0.024276	PSTPIP1	proline-serine-threonine phosphatase interacting protein 1 [Source:HGNC Symbol;Acc:HGNC:9580]
ENSOARG00000001659	1.10065	0.232313	191.28	50.1176	1.9323	1.379e-05	0.0013154	WDFY4	WDFY family member 4 [Source:HGNC Symbol;Acc:HGNC:29323]
ENSOARG00000001660	60.9027	13.8875	1257.66	346.466	1.86	1.9829e-06	0.00028444	PRELP	proline/arginine-rich end leucine-rich repeat protein [Source:HGNC Symbol;Acc:HGNC:9357]
ENSOARG00000001783	365.833	116.295	7439.18	3046.81	1.2878	0.00048101	0.019392	FOS	FBJ murine osteosarcoma viral oncogene homolog [Source:HGNC Symbol;Acc:HGNC:3796]
ENSOARG00000001806	0.655242	1.88733	35.3229	122.471	-1.7938	9.1022e-05	0.0055373	THEM6	thioesterase superfamily member 6 [Source:HGNC Symbol;Acc:HGNC:29656]
ENSOARG00000001964	1.39322	0.194344	137.448	24.4572	2.4905	1.8153e-07	4.391e-05	NUP210	nucleoporin 210kDa [Source:HGNC Symbol;Acc:HGNC:30052]
ENSOARG00000001968	106.068	27.8091	7624.85	2412.97	1.6599	7.8759e-05	0.0049483	MFAP5	microfibrillar associated protein 5 [Source:HGNC Symbol;Acc:HGNC:29673]
ENSOARG00000001980	1.19654	0.269067	69.6499	18.8328	1.8869	0.00033276	0.014796	NLRC3	NLR family, CARD domain containing 3 [Source:HGNC Symbol;Acc:HGNC:29889]
ENSOARG00000002033	75.0983	146.832	2803.27	6652.69	-1.2468	0.00082233	0.029068	NADK	NAD kinase [Source:HGNC Symbol;Acc:HGNC:29831]
ENSOARG00000002039	43.2341	12.4844	322.179	113.891	1.5002	0.00024366	0.011694	CMTM3	CKLF-like MARVEL transmembrane domain containing 3 [Source:HGNC Symbol;Acc:HGNC:19174]
ENSOARG00000002053	187.425	12.6378	5012.73	403.864	3.6337	5.7235e-10	4.072e-07	EFEMP1	EGF containing fibulin-like extracellular matrix protein 1 [Source:HGNC Symbol;Acc:HGNC:3218]
ENSOARG00000002094	80.8064	21.6325	1912.57	622.165	1.6201	2.0223e-05	0.0017723	LAPTM5	lysosomal protein transmembrane 5 [Source:HGNC Symbol;Acc:HGNC:29612]
ENSOARG00000002099	2.56276	0.552538	50.4264	12.6011	2.0006	0.00062496	0.023882	-	Uncharacterized protein [Source:UniProtKB/TrEMBL;Acc:W5NVL4]
ENSOARG00000002108	6.06429	1.11527	147.96	34.774	2.0891	2.0421e-05	0.0017733	-	Uncharacterized protein [Source:UniProtKB/TrEMBL;Acc:W5NVM4]
ENSOARG00000002143	1.49814	0.231485	79.0797	14.7999	2.4177	5.9334e-06	0.00066944	-	Uncharacterized protein [Source:UniProtKB/TrEMBL;Acc:W5NVR0]
ENSOARG00000002144	8.69821	2.90186	288.686	116.288	1.3118	0.0013994	0.04312	LDLRAD4	low density lipoprotein receptor class A domain containing 4 [Source:HGNC Symbol;Acc:HGNC:1224]
ENSOARG00000002157	0.68873	0.06309	17.1726	1.91517	3.1646	0.0010662	0.035234	NCR1	natural cytotoxicity triggering receptor 1 [Source:HGNC Symbol;Acc:HGNC:6731]
ENSOARG00000002223	7.11139	2.51997	1157.26	475.889	1.282	0.00069856	0.025719	MYOF	myoferlin [Source:HGNC Symbol;Acc:HGNC:3656]
ENSOARG00000002260	32.4863	82.8349	437.288	1396.57	-1.6752	0.00085877	0.02998	MDFI	MyoD family inhibitor [Source:HGNC Symbol;Acc:HGNC:6967]
ENSOARG00000002263	11.122	2.00171	393.352	85.7709	2.1973	1.627e-07	4.0158e-05	SRPX2	sushi-repeat containing protein, X-linked 2 [Source:HGNC Symbol;Acc:HGNC:30668]
ENSOARG00000002307	18.739	0.0606166	261.74	1.09576	7.9001	4.8614e-08	1.4517e-05	DLK1	delta-like 1 homolog (Drosophila) [Source:HGNC Symbol;Acc:HGNC:2907]
ENSOARG00000002310	1.26191	3.68113	19.2428	69.3647	-1.8499	0.00056146	0.021905	FRMD1	FERM domain containing 1 [Source:HGNC Symbol;Acc:HGNC:21240]
ENSOARG00000002316	1.64148	0.124698	39.3829	3.6727	3.4227	3.0318e-06	0.00037608	-	Uncharacterized protein [Source:UniProtKB/TrEMBL;Acc:W5NWA6]
ENSOARG00000002366	13.23	28.251	303.473	790.313	-1.3809	0.00028876	0.013381	RXRA	retinoid X receptor, alpha [Source:HGNC Symbol;Acc:HGNC:10477]
ENSOARG00000002371	0.756193	0.0533896	17.3532	1.56732	3.4688	0.00060106	0.023136	-	Uncharacterized protein [Source:UniProtKB/TrEMBL;Acc:W5NWG8]
ENSOARG00000002378	19.7678	5.15679	494.016	156.38	1.6595	9.8461e-05	0.0058864	SGCE	sarcoglycan, epsilon [Source:HGNC Symbol;Acc:HGNC:10808]
ENSOARG00000002386	16.8148	42.5557	565.714	1780.74	-1.6543	0.0012982	0.041104	CRY2	cryptochrome circadian clock 2 [Source:HGNC Symbol;Acc:HGNC:2385]
ENSOARG00000002422	2.4475	0.486001	92.5346	22.978	2.0097	7.76e-05	0.004901	-	Uncharacterized protein [Source:UniProtKB/TrEMBL;Acc:W5NWL9]
ENSOARG00000002449	0.0623574	0.914803	1.21401	20.0642	-4.0468	3.3431e-05	0.0025946	SP5	Sp5 transcription factor [Source:HGNC Symbol;Acc:HGNC:14529]
ENSOARG00000002450	1.27038	0.222192	30.3072	6.28357	2.27	0.0013623	0.042573	-	Uncharacterized protein [Source:UniProtKB/TrEMBL;Acc:W5NWQ3]
ENSOARG00000002475	2.91739	0.198515	63.9984	5.38899	3.5699	2.0954e-08	7.7979e-06	PEG10	retrotransposon-derived protein PEG10 [Source:RefSeq peptide;Acc:NP_001277722]
ENSOARG00000002479	2.68427	0.766197	124.851	43.7635	1.5124	0.0009897	0.03325	PIK3R5	phosphoinositide-3-kinase, regulatory subunit 5 [Source:HGNC Symbol;Acc:HGNC:30035]
ENSOARG00000002554	3.94265	10.171	297.939	951.591	-1.6753	1.9037e-05	0.0016992	SLC22A18	solute carrier family 22, member 18 [Source:HGNC Symbol;Acc:HGNC:10964]
ENSOARG00000002555	65.9402	125.155	1169.95	2716.11	-1.2151	0.00093249	0.031949	LGALS12	lectin, galactoside-binding, soluble, 12 [Source:HGNC Symbol;Acc:HGNC:15788]
ENSOARG00000002632	6.61487	0.225947	210.209	8.71886	4.5915	1.8606e-07	4.4559e-05	-	Uncharacterized protein [Source:UniProtKB/TrEMBL;Acc:W5NX98]
ENSOARG00000002699	3.95185	0.693023	37.2505	8.25096	2.1746	0.00067149	0.024912	TNFSF14	tumor necrosis factor (ligand) superfamily, member 14 [Source:HGNC Symbol;Acc:HGNC:11930]
ENSOARG00000002700	2.67983	0.773453	93.5282	32.3431	1.5319	0.0013226	0.041657	-	Uncharacterized protein [Source:UniProtKB/TrEMBL;Acc:W5NXH3]
ENSOARG00000002714	2.48257	0.380211	28.1778	4.95637	2.5072	0.00063857	0.024196	-	Uncharacterized protein [Source:UniProtKB/TrEMBL;Acc:W5NXI2]
ENSOARG00000002725	23.0773	6.97807	174.667	64.6036	1.4349	0.0011925	0.038562	HRASLS2	HRAS-like suppressor 2 [Source:HGNC Symbol;Acc:HGNC:17824]
ENSOARG00000002744	61.1737	14.4636	5383.64	1539.79	1.8058	0.00010629	0.0062253	-	Uncharacterized protein [Source:UniProtKB/TrEMBL;Acc:W5NXL3]
ENSOARG00000002790	15.7385	2.92991	1133.33	245	2.2097	1.5759e-08	6.4608e-06	SLIT3	slit guidance ligand 3 [Source:HGNC Symbol;Acc:HGNC:11087]
ENSOARG00000002808	0.973209	0.0477801	66.664	3.70297	4.1702	2.791e-10	2.2504e-07	-	Protein Wnt [Source:UniProtKB/TrEMBL;Acc:W5NXT3]
ENSOARG00000002811	81.2082	18.8456	2309.31	655.909	1.8159	2.021e-06	0.00028756	CCNL1	cyclin L1 [Source:HGNC Symbol;Acc:HGNC:20569]
ENSOARG00000002820	1.55647	0.46586	134.402	47.3452	1.5053	0.00085834	0.02998	HCK	HCK proto-oncogene, Src family tyrosine kinase [Source:HGNC Symbol;Acc:HGNC:4840]
ENSOARG00000002832	4.76915	1.28945	91.9575	31.9786	1.5239	0.0015424	0.046004	-	Uncharacterized protein [Source:UniProtKB/TrEMBL;Acc:W5NXV9]
ENSOARG00000002851	16.6533	1.93035	1414.32	200.322	2.8197	1.7078e-10	1.53e-07	CYP4B1	cytochrome P450, family 4, subfamily B, polypeptide 1 [Source:HGNC Symbol;Acc:HGNC:2644]
ENSOARG00000002937	1243.26	2793.17	13834.2	38092.5	-1.4613	8.0461e-05	0.0050162	-	Uncharacterized protein [Source:UniProtKB/TrEMBL;Acc:W5NY70]
ENSOARG00000002960	1.055	0.266393	99.8984	31.0154	1.6875	0.00061798	0.023653	STON2	stonin 2 [Source:HGNC Symbol;Acc:HGNC:30652]
ENSOARG00000002967	1.60795	4.5486	78.6242	272.172	-1.7915	1.8867e-05	0.0016903	SARDH	sarcosine dehydrogenase [Source:HGNC Symbol;Acc:HGNC:10536]
ENSOARG00000002970	6.99012	2.03834	177.961	63.9193	1.4772	0.00051754	0.02059	-	Uncharacterized protein [Source:UniProtKB/TrEMBL;Acc:W5NYB0]
ENSOARG00000002973	3.97748	0.576395	155.381	28.069	2.4688	1.9014e-07	4.5092e-05	KCNN3	potassium channel, calcium activated intermediate/small conductance subfamily N alpha, member 3 [Source:HGNC Symbol;Acc:HGNC:6292]
ENSOARG00000003028	2.12228	0.301093	191.52	32.932	2.5399	3.7248e-08	1.1855e-05	DOCK2	dedicator of cytokinesis 2 [Source:HGNC Symbol;Acc:HGNC:2988]
ENSOARG00000003059	44.5551	10.4452	1209.12	361.083	1.7436	6.3036e-06	0.00069622	AGPAT9	1-acylglycerol-3-phosphate O-acyltransferase 9 [Source:HGNC Symbol;Acc:HGNC:28157]
ENSOARG00000003099	2.26434	0.600008	216.646	71.9667	1.5899	0.00015928	0.0084866	RASAL3	RAS protein activator like 3 [Source:HGNC Symbol;Acc:HGNC:26129]
ENSOARG00000003112	151.85	27.2036	14530.8	3224.71	2.1719	0.00032963	0.014711	AKAP12	A kinase (PRKA) anchor protein 12 [Source:HGNC Symbol;Acc:HGNC:370]
ENSOARG00000003130	24.8543	6.75172	864.298	272.562	1.6649	0.00011654	0.0066643	PLAT	plasminogen activator, tissue [Source:HGNC Symbol;Acc:HGNC:9051]
ENSOARG00000003148	4.66982	1.2562	175.662	56.8608	1.6273	0.00022212	0.010898	ZBTB2	zinc finger and BTB domain containing 2 [Source:HGNC Symbol;Acc:HGNC:20868]
ENSOARG00000003149	0.556282	1.74819	26.9831	108.364	-2.0058	0.000401	0.017089	UNC5A	unc-5 netrin receptor A [Source:HGNC Symbol;Acc:HGNC:12567]
ENSOARG00000003206	18.0448	5.6931	348.003	131.629	1.4026	0.00058296	0.0226	CHORDC1	cysteine and histidine-rich domain (CHORD) containing 1 [Source:HGNC Symbol;Acc:HGNC:14525]
ENSOARG00000003254	4.77971	1.28717	96.6933	32.7298	1.5628	0.0011884	0.038481	THEMIS2	thymocyte selection associated family member 2 [Source:HGNC Symbol;Acc:HGNC:16839]
ENSOARG00000003268	2.11468	0.285588	89.4315	15.0583	2.5702	1.0454e-06	0.00017204	NAALAD2	N-acetylated alpha-linked acidic dipeptidase 2 [Source:HGNC Symbol;Acc:HGNC:14526]
ENSOARG00000003319	11.4879	3.84828	1375.53	571.864	1.2662	0.00079097	0.028261	F8	coagulation factor VIII, procoagulant component [Source:HGNC Symbol;Acc:HGNC:3546]
ENSOARG00000003358	2.63473	0.703046	161.842	52.2629	1.6307	0.00021023	0.010419	TRERF1	transcriptional regulating factor 1 [Source:HGNC Symbol;Acc:HGNC:18273]
ENSOARG00000003422	2.92999	0.498015	96.0586	20.0183	2.2626	7.5031e-06	0.00078568	SMPD3	sphingomyelin phosphodiesterase 3, neutral membrane (neutral sphingomyelinase II) [Source:HGNC Symbol;Acc:HGNC:14240]
ENSOARG00000003585	9.95884	3.19422	405.025	158.562	1.353	0.00065307	0.024529	ELMO1	engulfment and cell motility 1 [Source:HGNC Symbol;Acc:HGNC:16286]
ENSOARG00000003587	1.33452	0.233085	145.729	30.4728	2.2577	1.34e-06	0.00021048	CERS4	ceramide synthase 4 [Source:HGNC Symbol;Acc:HGNC:23747]
ENSOARG00000003604	33.1142	9.98808	827.501	307.245	1.4294	0.00023061	0.011156	CORO1A	coronin, actin binding protein, 1A [Source:HGNC Symbol;Acc:HGNC:2252]
ENSOARG00000003782	3095.96	941.46	20026.6	7466.84	1.4233	0.00016973	0.0089299	B2M	beta-2-microglobulin [Source:HGNC Symbol;Acc:HGNC:914]
ENSOARG00000003798	1.01397	0.171519	136.234	25.8557	2.3975	3.9088e-07	7.6677e-05	PLCE1	phospholipase C, epsilon 1 [Source:HGNC Symbol;Acc:HGNC:17175]
ENSOARG00000003844	1.47035	0.302968	77.7289	19.9634	1.9611	0.00031855	0.014456	NOX4	NADPH oxidase 4 [Source:HGNC Symbol;Acc:HGNC:7891]
ENSOARG00000003908	5.8303	1.85022	157.788	59.2276	1.4136	0.0014176	0.043407	IRF5	interferon regulatory factor 5 [Source:HGNC Symbol;Acc:HGNC:6120]
ENSOARG00000003936	0.146678	3.60289	3.32358	92.1471	-4.7931	1.2129e-06	0.00019559	CALB2	calbindin 2 [Source:HGNC Symbol;Acc:HGNC:1435]
ENSOARG00000003963	978.031	202.39	19428.3	5021.19	1.9521	3.0603e-07	6.3815e-05	DUSP1	dual specificity phosphatase 1 [Source:HGNC Symbol;Acc:HGNC:3064]
ENSOARG00000003991	5.47289	0.811324	139.798	26.2523	2.4128	3.9986e-07	7.6677e-05	EVI2B	ecotropic viral integration site 2B [Source:HGNC Symbol;Acc:HGNC:3500]
ENSOARG00000003994	16.4149	5.02923	1100.63	414.83	1.4077	0.00021063	0.010419	CTSC	cathepsin C [Source:HGNC Symbol;Acc:HGNC:2528]
ENSOARG00000004010	33.5107	10.4873	1240.56	474.827	1.3855	0.00030251	0.013943	SNRK	SNF related kinase [Source:HGNC Symbol;Acc:HGNC:30598]
ENSOARG00000004015	99.2154	32.5714	4015.92	1558.72	1.3654	0.00022615	0.011007	CD248	CD248 molecule, endosialin [Source:HGNC Symbol;Acc:HGNC:18219]
ENSOARG00000004086	5.24861	1.00081	265.808	62.3658	2.0916	0.00039857	0.017034	BICC1	BicC family RNA binding protein 1 [Source:HGNC Symbol;Acc:HGNC:19351]
ENSOARG00000004088	4.50115	8.53689	176.94	410.52	-1.2142	0.0015965	0.047211	SLC25A13	solute carrier family 25 (aspartate/glutamate carrier), member 13 [Source:HGNC Symbol;Acc:HGNC:10983]
ENSOARG00000004186	6.14975	1.37334	200.913	54.213	1.8899	2.0307e-05	0.0017733	FAM13C	family with sequence similarity 13, member C [Source:HGNC Symbol;Acc:HGNC:19371]
ENSOARG00000004208	422.708	93.6037	2855.09	781.326	1.8695	0.0010644	0.035222	C8orf4	chromosome 8 open reading frame 4 [Source:HGNC Symbol;Acc:HGNC:1357]
ENSOARG00000004250	2.61495	6.1425	33.1721	97.0092	-1.5481	0.0012172	0.039206	FAM57B	family with sequence similarity 57, member B [Source:HGNC Symbol;Acc:HGNC:25295]
ENSOARG00000004298	30.4289	6.07748	435.637	104.804	2.0554	7.0757e-07	0.00012225	-	Uncharacterized protein [Source:UniProtKB/TrEMBL;Acc:W5P2F1]
ENSOARG00000004312	0.583626	3.78108	5.61195	45.5135	-3.0197	0.0010048	0.033571	TNNC1	troponin C type 1 (slow) [Source:HGNC Symbol;Acc:HGNC:11943]
ENSOARG00000004314	981.552	3205.27	4562.94	18842.4	-2.0459	0.00054667	0.021432	G0S2	G0/G1 switch 2 [Source:HGNC Symbol;Acc:HGNC:30229]
ENSOARG00000004368	72.5456	12.7686	2287.01	474.625	2.2686	5.3608e-05	0.003737	LOXL1	lysyl oxidase-like 1 [Source:HGNC Symbol;Acc:HGNC:6665]
ENSOARG00000004394	0.435825	1.51222	17.1942	72.9016	-2.084	0.00031171	0.01428	FAM169A	family with sequence similarity 169, member A [Source:HGNC Symbol;Acc:HGNC:29138]
ENSOARG00000004396	2.7488	6.38128	130.789	369.721	-1.4992	0.00014274	0.0079039	LRP3	low density lipoprotein receptor-related protein 3 [Source:HGNC Symbol;Acc:HGNC:6695]
ENSOARG00000004403	4.11316	1.32093	454.975	177.071	1.3615	0.00076158	0.027438	ARID5B	AT rich interactive domain 5B (MRF1-like) [Source:HGNC Symbol;Acc:HGNC:17362]
ENSOARG00000004414	133.416	347.259	966.394	3040.65	-1.6537	1.6163e-05	0.0014929	CEBPA	CCAAT/enhancer binding protein (C/EBP), alpha [Source:HGNC Symbol;Acc:HGNC:1833]
ENSOARG00000004464	19.1	43.5541	725.143	2048.48	-1.4982	7.5062e-05	0.0048034	KCTD15	potassium channel tetramerization domain containing 15 [Source:HGNC Symbol;Acc:HGNC:23297]
ENSOARG00000004469	1.74231	0.432928	80.7554	25.0704	1.6876	0.00084766	0.029746	TAGAP	T-cell activation RhoGTPase activating protein [Source:HGNC Symbol;Acc:HGNC:15669]
ENSOARG00000004484	5.8987	1.12159	179.937	41.3043	2.1231	0.00040127	0.017089	RGS14	regulator of G-protein signaling 14 [Source:HGNC Symbol;Acc:HGNC:9996]
ENSOARG00000004499	1.76157	0.274348	144.977	29.2187	2.3109	0.00014332	0.0079039	DLX5	distal-less homeobox 5 [Source:HGNC Symbol;Acc:HGNC:2918]
ENSOARG00000004502	905.792	1726.69	27444.5	64827	-1.2401	0.00074366	0.02705	GPI	glucose-6-phosphate isomerase [Source:HGNC Symbol;Acc:HGNC:4458]
ENSOARG00000004506	12.9844	3.5889	181.313	59.1611	1.6158	0.00024036	0.011569	OTUD1	OTU deubiquitinase 1 [Source:HGNC Symbol;Acc:HGNC:27346]
ENSOARG00000004617	5.55042	12.1906	108.792	286.636	-1.3976	0.00063711	0.024193	-	Uncharacterized protein [Source:UniProtKB/TrEMBL;Acc:W5P3D9]
ENSOARG00000004628	4.90648	1.26031	130.179	42.0655	1.6298	0.00031355	0.014337	ZNF683	zinc finger protein 683 [Source:HGNC Symbol;Acc:HGNC:28495]
ENSOARG00000004672	0.596538	2.19667	7.82064	35.3673	-2.1771	0.00068752	0.02539	FAM69C	family with sequence similarity 69, member C [Source:HGNC Symbol;Acc:HGNC:31729]
ENSOARG00000004721	111.781	18.3613	538.955	102.599	2.3931	6.2759e-09	3.0244e-06	-	regakine 1-like protein precursor [Source:RefSeq peptide;Acc:NP_001093099]
ENSOARG00000004774	57.1499	17.4962	382.368	146.105	1.388	0.00070566	0.025941	-	Uncharacterized protein [Source:UniProtKB/TrEMBL;Acc:W5P3V8]
ENSOARG00000004787	2.45726	0.185429	188.061	17.0826	3.4606	1.416e-11	1.8027e-08	SLIT2	slit guidance ligand 2 [Source:HGNC Symbol;Acc:HGNC:11086]
ENSOARG00000004797	32.8367	9.99768	1362.51	503.756	1.4355	0.00021997	0.010815	WWTR1	WW domain containing transcription regulator 1 [Source:HGNC Symbol;Acc:HGNC:24042]
ENSOARG00000004800	79.6661	245.654	2765.46	10387	-1.9092	3.9986e-07	7.6677e-05	EEPD1	endonuclease/exonuclease/phosphatase family domain containing 1 [Source:HGNC Symbol;Acc:HGNC:22223]
ENSOARG00000004802	11.2646	2.70319	71.3194	21.3579	1.7395	0.00060162	0.023136	-	Uncharacterized protein [Source:UniProtKB/TrEMBL;Acc:W5P3Z3]
ENSOARG00000004803	43.5354	12.7122	156.509	55.8801	1.4858	0.00065406	0.024529	-	Uncharacterized protein [Source:UniProtKB/TrEMBL;Acc:W5P3Z8]
ENSOARG00000004812	7.36067	2.14817	258.5	91.6291	1.4963	0.00033626	0.014897	FERMT3	fermitin family member 3 [Source:HGNC Symbol;Acc:HGNC:23151]
ENSOARG00000004871	344.554	772.944	27179.3	74405.4	-1.4529	0.00014365	0.0079039	COL1A1	collagen, type I, alpha 1 [Source:HGNC Symbol;Acc:HGNC:2197]
ENSOARG00000004874	1.12855	2.44331	70.6407	191.998	-1.4425	0.00083184	0.029289	FAM160A1	family with sequence similarity 160, member A1 [Source:HGNC Symbol;Acc:HGNC:34237]
ENSOARG00000004983	3.66599	1.00588	166.602	55.2688	1.5919	0.00033179	0.01478	VAV1	vav 1 guanine nucleotide exchange factor [Source:HGNC Symbol;Acc:HGNC:12657]
ENSOARG00000005006	175.425	56.4705	6670.99	2653.93	1.3298	0.00044318	0.018356	SPARCL1	SPARC-like 1 (hevin) [Source:HGNC Symbol;Acc:HGNC:11220]
ENSOARG00000005007	14.9639	2.34124	463.538	81.4941	2.5079	1.228e-09	7.4261e-07	DACT2	dishevelled-binding antagonist of beta-catenin 2 [Source:HGNC Symbol;Acc:HGNC:21231]
ENSOARG00000005056	1.64884	0.193278	72.158	9.71386	2.893	1.7909e-06	0.00026415	CDH19	cadherin 19, type 2 [Source:HGNC Symbol;Acc:HGNC:1758]
ENSOARG00000005075	10.58	3.06749	419.42	152.055	1.4638	0.00032376	0.014557	ZNF366	zinc finger protein 366 [Source:HGNC Symbol;Acc:HGNC:18316]
ENSOARG00000005117	43.4599	8.6388	1302	299.682	2.1192	4.8187e-08	1.4517e-05	THBD	thrombomodulin [Source:HGNC Symbol;Acc:HGNC:11784]
ENSOARG00000005151	1.90245	0.144085	591.509	52.1576	3.5035	5.3155e-16	2.1429e-12	HMCN1	hemicentin 1 [Source:HGNC Symbol;Acc:HGNC:19194]
ENSOARG00000005167	86.4638	27.7682	513.955	201.091	1.3538	0.00064043	0.024196	TYROBP	TYRO protein tyrosine kinase binding protein [Source:HGNC Symbol;Acc:HGNC:12449]
ENSOARG00000005236	1.44626	0.159493	52.0174	7.51768	2.7906	6.0434e-06	0.00067365	VSIG4	V-set and immunoglobulin domain containing 4 [Source:HGNC Symbol;Acc:HGNC:17032]
ENSOARG00000005322	56.4841	12.4732	465.459	122.955	1.9205	6.7473e-05	0.0044111	SRGN	serglycin [Source:HGNC Symbol;Acc:HGNC:9361]
ENSOARG00000005365	1.7847	0.255145	146.859	24.7915	2.5665	6.1642e-08	1.7542e-05	FHOD3	formin homology 2 domain containing 3 [Source:HGNC Symbol;Acc:HGNC:26178]
ENSOARG00000005434	0.0274779	3.04517	0.577094	82.9265	-7.1669	2.2409e-05	0.0018952	ZIC1	Zic family member 1 [Source:HGNC Symbol;Acc:HGNC:12872]
ENSOARG00000005443	631.907	68.2712	26017.7	3430.57	2.923	0.0016506	0.048163	DNAJB1	DnaJ (Hsp40) homolog, subfamily B, member 1 [Source:HGNC Symbol;Acc:HGNC:5270]
ENSOARG00000005450	0.910389	0.0417406	64.6157	3.11636	4.374	0.0016105	0.047507	-	Uncharacterized protein [Source:UniProtKB/TrEMBL;Acc:W5P608]
ENSOARG00000005467	0.00303196	0.683732	0.318459	87.8778	-8.1082	7.8382e-06	0.00080848	ZIC4	Zic family member 4 [Source:HGNC Symbol;Acc:HGNC:20393]
ENSOARG00000005579	2.14636	0.381706	89.3695	19.5757	2.1907	1.9399e-05	0.0017189	SEMA4A	sema domain, immunoglobulin domain (Ig), transmembrane domain (TM) and short cytoplasmic domain, (semaphorin) 4A [Source:HGNC Symbol;Acc:HGNC:10729]
ENSOARG00000005599	5.66453	1.35706	272.824	79.6962	1.7754	4.2442e-05	0.0031491	DENND1C	DENN/MADD domain containing 1C [Source:HGNC Symbol;Acc:HGNC:26225]
ENSOARG00000005646	30.372	67.5103	896.215	2477.81	-1.4671	0.00010285	0.0060828	GLYCTK	glycerate kinase [Source:HGNC Symbol;Acc:HGNC:24247]
ENSOARG00000005711	1.3415	0.169244	47.8382	7.5067	2.6719	1.9108e-05	0.0016993	COL13A1	collagen, type XIII, alpha 1 [Source:HGNC Symbol;Acc:HGNC:2190]
ENSOARG00000005721	3.92946	0.883584	84.4787	23.9032	1.8214	0.00046204	0.018847	SLA	Src-like-adaptor [Source:HGNC Symbol;Acc:HGNC:10902]
ENSOARG00000005746	4.00517	0.841438	182.427	46.5517	1.9704	0.00024058	0.011569	MAP4K1	mitogen-activated protein kinase kinase kinase kinase 1 [Source:HGNC Symbol;Acc:HGNC:6863]
ENSOARG00000005781	0.280195	20.2176	2.44795	197.606	-6.3349	1.5333e-09	9.0463e-07	IRX1	iroquois homeobox 1 [Source:HGNC Symbol;Acc:HGNC:14358]
ENSOARG00000005792	8.86535	2.69426	403.433	152.974	1.399	0.00052341	0.020756	TLR4	toll-like receptor 4 [Source:HGNC Symbol;Acc:HGNC:11850]
ENSOARG00000005795	5.48179	1.61525	231.103	84.4074	1.4531	0.00067995	0.025149	DTNA	dystrobrevin, alpha [Source:HGNC Symbol;Acc:HGNC:3057]
ENSOARG00000005846	4.25731	1.03441	167.02	49.9424	1.7417	6.6203e-05	0.0043577	TMC8	transmembrane channel-like 8 [Source:HGNC Symbol;Acc:HGNC:20474]
ENSOARG00000005926	153.868	54.8848	3483.96	1490.7	1.2247	0.0012967	0.041104	PCOLCE2	procollagen C-endopeptidase enhancer 2 [Source:HGNC Symbol;Acc:HGNC:8739]
ENSOARG00000006007	1.83713	0.276966	43.6614	7.72718	2.4983	0.00010853	0.0063108	NGFR	nerve growth factor receptor [Source:HGNC Symbol;Acc:HGNC:7809]
ENSOARG00000006029	3.82993	0.965757	182.96	55.3614	1.7246	7.6762e-05	0.0048979	GMFG	glia maturation factor, gamma [Source:HGNC Symbol;Acc:HGNC:4374]
ENSOARG00000006034	2.14772	5.11559	190.762	533.394	-1.4834	0.00025449	0.012094	SIX2	SIX homeobox 2 [Source:HGNC Symbol;Acc:HGNC:10888]
ENSOARG00000006043	8.82161	17.61	126.429	311.384	-1.3004	0.00097356	0.033005	LRRC20	leucine rich repeat containing 20 [Source:HGNC Symbol;Acc:HGNC:23421]
ENSOARG00000006058	11.9268	2.65427	85.8668	23.2374	1.8857	0.00019629	0.0099332	-	Uncharacterized protein [Source:UniProtKB/TrEMBL;Acc:W5P7T2]
ENSOARG00000006068	262.713	84.3728	12158.7	4914.6	1.3068	0.00040459	0.017169	ZFP36	ZFP36 ring finger protein [Source:HGNC Symbol;Acc:HGNC:12862]
ENSOARG00000006108	18.7228	34.2678	931.113	2109.56	-1.1799	0.0013197	0.041657	PALD1	phosphatase domain containing, paladin 1 [Source:HGNC Symbol;Acc:HGNC:23530]
ENSOARG00000006117	9.49736	19.3967	254.675	648.199	-1.3478	0.00146	0.044257	SLC41A3	solute carrier family 41, member 3 [Source:HGNC Symbol;Acc:HGNC:31046]
ENSOARG00000006135	8.27538	1.71123	166.047	42.2897	1.9732	1.4112e-05	0.0013387	SEPT1	septin 1 [Source:HGNC Symbol;Acc:HGNC:2879]
ENSOARG00000006139	11.815	2.69886	349.076	96.3655	1.857	4.7978e-06	0.00055204	PRF1	perforin 1 (pore forming protein) [Source:HGNC Symbol;Acc:HGNC:9360]
ENSOARG00000006212	5.05085	12.7394	36.9902	116.681	-1.6574	0.00054283	0.021344	CRABP2	cellular retinoic acid binding protein 2 [Source:HGNC Symbol;Acc:HGNC:2339]
ENSOARG00000006301	1.49704	0.207637	101.335	17.3988	2.5421	0.00033957	0.014982	CD4	T-cell surface glycoprotein CD4 precursor [Source:RefSeq peptide;Acc:NP_001123374]
ENSOARG00000006353	3.41839	0.132057	36.5186	1.88125	4.2789	0.00014443	0.0079039	OSM	oncostatin M [Source:HGNC Symbol;Acc:HGNC:8506]
ENSOARG00000006358	27.5695	6.13038	1436.62	379.826	1.9193	9.9459e-07	0.00016592	CSF1R	colony stimulating factor 1 receptor [Source:HGNC Symbol;Acc:HGNC:2433]
ENSOARG00000006374	14.7309	2.50571	186.146	38.5033	2.2734	3.1132e-05	0.002461	-	Uncharacterized protein [Source:UniProtKB/TrEMBL;Acc:W5P8R9]
ENSOARG00000006378	2.56484	11.3428	63.1229	350.518	-2.4733	2.67e-06	0.00035293	BMP5	bone morphogenetic protein 5 [Source:HGNC Symbol;Acc:HGNC:1072]
ENSOARG00000006400	4.0102	0.822961	90.482	23.153	1.9664	6.2162e-05	0.0041537	SH2D2A	SH2 domain containing 2A [Source:HGNC Symbol;Acc:HGNC:10821]
ENSOARG00000006421	0.944318	0.174018	33.3516	7.58553	2.1364	0.0012946	0.041104	RUNX3	runt-related transcription factor 3 [Source:HGNC Symbol;Acc:HGNC:10473]
ENSOARG00000006526	76.5564	142.164	1991.52	4574.72	-1.1998	0.0014115	0.043385	AKT2	v-akt murine thymoma viral oncogene homolog 2 [Source:HGNC Symbol;Acc:HGNC:392]
ENSOARG00000006538	44.7069	16.2179	2746.13	1185.67	1.2117	0.0014727	0.044473	PDGFRB	platelet-derived growth factor receptor, beta polypeptide [Source:HGNC Symbol;Acc:HGNC:8804]
ENSOARG00000006553	18.0929	5.64442	253.642	95.2813	1.4125	0.00064945	0.024432	SPI1	Spi-1 proto-oncogene [Source:HGNC Symbol;Acc:HGNC:11241]
ENSOARG00000006591	2.61675	0.797707	105.147	38.6101	1.4454	0.0014138	0.043398	ARHGAP9	Rho GTPase activating protein 9 [Source:HGNC Symbol;Acc:HGNC:14130]
ENSOARG00000006614	1.01436	0.0472476	27.6581	1.56367	4.1447	0.0015669	0.046554	TBX5	T-box 5 [Source:HGNC Symbol;Acc:HGNC:11604]
ENSOARG00000006737	19.8954	3.75562	108.858	24.7795	2.1352	0.0006354	0.024166	KCNE3	potassium channel, voltage gated subfamily E regulatory beta subunit 3 [Source:HGNC Symbol;Acc:HGNC:6243]
ENSOARG00000006760	15.2701	4.01661	348.296	112.064	1.636	0.0001891	0.0097323	LPAR1	lysophosphatidic acid receptor 1 [Source:HGNC Symbol;Acc:HGNC:3166]
ENSOARG00000006809	3.24856	0.661174	73.5498	18.2984	2.007	0.00011116	0.0064175	-	Uncharacterized protein [Source:UniProtKB/TrEMBL;Acc:W5PA32]
ENSOARG00000006813	14.4879	3.51351	321.448	98.2084	1.7107	3.3057e-05	0.0025794	VEGFC	vascular endothelial growth factor C [Source:HGNC Symbol;Acc:HGNC:12682]
ENSOARG00000006817	10.0702	23.4201	205.129	593.756	-1.5333	8.5737e-05	0.0052905	-	Uncharacterized protein [Source:UniProtKB/TrEMBL;Acc:W5PA44]
ENSOARG00000006979	7.06641	2.40574	317.983	125.181	1.3449	0.00087494	0.030495	RHBDF2	rhomboid 5 homolog 2 (Drosophila) [Source:HGNC Symbol;Acc:HGNC:20788]
ENSOARG00000006995	6.11505	1.85294	244.673	88.5976	1.4655	0.00048773	0.019538	FCHSD2	FCH and double SH3 domains 2 [Source:HGNC Symbol;Acc:HGNC:29114]
ENSOARG00000007134	18.8626	3.44176	282.703	62.3291	2.1813	0.0010398	0.034597	HOXB2	homeobox B2 [Source:HGNC Symbol;Acc:HGNC:5113]
ENSOARG00000007175	50.643	10.9328	326.322	84.6792	1.9462	2.76e-06	0.00035523	-	Uncharacterized protein [Source:UniProtKB/TrEMBL;Acc:W5PB75]
ENSOARG00000007191	82.3508	26.2275	449.498	177.062	1.3441	0.00073449	0.026757	-	Uncharacterized protein [Source:UniProtKB/TrEMBL;Acc:W5PB95]
ENSOARG00000007229	374.029	77.4859	8485.6	2151.09	1.9799	3.0135e-07	6.3815e-05	CD74	CD74 molecule, major histocompatibility complex, class II invariant chain [Source:HGNC Symbol;Acc:HGNC:1697]
ENSOARG00000007234	132.979	31.923	4937.88	1467.95	1.7501	0.00011524	0.0066057	PLK2	polo-like kinase 2 [Source:HGNC Symbol;Acc:HGNC:19699]
ENSOARG00000007252	34.7741	10.6636	839.536	310.72	1.434	0.00020555	0.01023	CD1D	CD1d molecule [Source:HGNC Symbol;Acc:HGNC:1637]
ENSOARG00000007256	1.38429	0.37524	102.862	32.3963	1.6668	0.0009986	0.03341	CCDC88B	coiled-coil domain containing 88B [Source:HGNC Symbol;Acc:HGNC:26757]
ENSOARG00000007263	9.41584	1.70284	165.099	35.5932	2.2137	0.00041543	0.017507	SDSL	serine dehydratase-like [Source:HGNC Symbol;Acc:HGNC:30404]
ENSOARG00000007278	0.892991	3.17772	28.5573	124.575	-2.1251	3.6822e-05	0.0027921	ANGPTL5	angiopoietin-like 5 [Source:HGNC Symbol;Acc:HGNC:19705]
ENSOARG00000007322	3.06775	0.518814	87.9953	18.0097	2.2887	7.9356e-06	0.00081337	-	Uncharacterized protein [Source:UniProtKB/TrEMBL;Acc:W5PBN8]
ENSOARG00000007395	3.58097	0.90469	170.588	53.7681	1.6657	0.00014747	0.0080343	TRPC6	transient receptor potential cation channel, subfamily C, member 6 [Source:HGNC Symbol;Acc:HGNC:12338]
ENSOARG00000007427	9.36282	1.87935	125.591	30.4838	2.0426	1.617e-05	0.0014929	EPSTI1	epithelial stromal interaction 1 (breast) [Source:HGNC Symbol;Acc:HGNC:16465]
ENSOARG00000007452	326.903	1.76862	10381.3	70.4851	7.2025	1.38e-05	0.0013154	HSPA6	Uncharacterized protein [Source:UniProtKB/TrEMBL;Acc:W5PC31]Ovis aries heat shock protein family A (Hsp70) member 6 (HSPA6), transcript variant X1, mRNA
ENSOARG00000007493	20.9255	111.413	619.728	4188.91	-2.7569	0.00016231	0.00861	DHCR24	24-dehydrocholesterol reductase [Source:HGNC Symbol;Acc:HGNC:2859]
ENSOARG00000007510	0.120597	2.18729	10.3085	239.351	-4.5372	0.00047545	0.019264	TMEM61	transmembrane protein 61 [Source:HGNC Symbol;Acc:HGNC:27296]
ENSOARG00000007525	29.6904	7.9356	1666.73	531.174	1.6498	2.1452e-05	0.0018207	AXL	AXL receptor tyrosine kinase [Source:HGNC Symbol;Acc:HGNC:905]
ENSOARG00000007603	8.50722	2.09827	184.394	54.4435	1.76	6.5702e-05	0.0043541	-	Uncharacterized protein [Source:UniProtKB/TrEMBL;Acc:W5PCJ3]
ENSOARG00000007615	41.6966	13.6708	986.003	399.65	1.3029	0.00066516	0.024791	-	Uncharacterized protein [Source:UniProtKB/TrEMBL;Acc:W5PCL0]
ENSOARG00000007625	3.93874	0.681397	123.858	25.9257	2.2562	3.8001e-06	0.00045059	IL10RA	interleukin 10 receptor, alpha [Source:HGNC Symbol;Acc:HGNC:5964]
ENSOARG00000007640	1.0198	4.24485	67.7385	337.112	-2.3152	3.3298e-08	1.0884e-05	PLEKHA6	pleckstrin homology domain containing, family A member 6 [Source:HGNC Symbol;Acc:HGNC:17053]
ENSOARG00000007656	265.316	83.8729	7476.95	2908.16	1.3623	0.00081065	0.02875	BGN	biglycan [Source:HGNC Symbol;Acc:HGNC:1044]
ENSOARG00000007679	2.4947	0.652142	85.2317	27.7428	1.6193	0.0013889	0.042891	-	Uncharacterized protein [Source:UniProtKB/TrEMBL;Acc:W5PCS4]
ENSOARG00000007690	2.56221	0.625529	53.2132	15.5528	1.7746	0.0014887	0.044843	S1PR3	sphingosine-1-phosphate receptor 3 [Source:HGNC Symbol;Acc:HGNC:3167]
ENSOARG00000007758	4.0444	1.10416	83.8776	26.9344	1.6388	0.00094962	0.032415	-	Uncharacterized protein [Source:UniProtKB/TrEMBL;Acc:W5PD11]
ENSOARG00000007763	2.00581	0.516171	62.5657	19.4157	1.6881	0.0016402	0.048046	ETV1	ets variant 1 [Source:HGNC Symbol;Acc:HGNC:3490]
ENSOARG00000007774	3.53294	0.373941	67.8762	9.31279	2.8656	6.3958e-07	0.00011211	CYTIP	cytohesin 1 interacting protein [Source:HGNC Symbol;Acc:HGNC:9506]
ENSOARG00000007830	3.66464	1.1125	207.64	77.8047	1.4162	0.00076225	0.027438	ANKRD29	ankyrin repeat domain 29 [Source:HGNC Symbol;Acc:HGNC:27110]
ENSOARG00000007840	55.1154	15.0072	1621.35	542.371	1.5798	2.6661e-05	0.0021787	BHLHE40	basic helix-loop-helix family, member e40 [Source:HGNC Symbol;Acc:HGNC:1046]
ENSOARG00000007849	5.75217	0.709193	65.4318	9.76973	2.7436	2.1062e-06	0.00029621	PLEKHB1	pleckstrin homology domain containing, family B (evectins) member 1 [Source:HGNC Symbol;Acc:HGNC:19079]
ENSOARG00000007864	13.1296	3.30325	547.834	165.457	1.7273	1.654e-05	0.0015212	LCP1	lymphocyte cytosolic protein 1 (L-plastin) [Source:HGNC Symbol;Acc:HGNC:6528]
ENSOARG00000007906	5.19456	1.50609	533.034	189.095	1.4951	0.00016454	0.0087091	-	Uncharacterized protein [Source:UniProtKB/TrEMBL;Acc:W5PDG9]
ENSOARG00000007932	28.0562	6.6049	224.072	63.7526	1.8134	2.5169e-05	0.0020922	AIF1	allograft inflammatory factor 1 [Source:HGNC Symbol;Acc:HGNC:352]
ENSOARG00000007944	2.09901	0.244505	32.2392	4.81336	2.7437	0.00044875	0.018555	SLAMF8	SLAM family member 8 [Source:HGNC Symbol;Acc:HGNC:21391]
ENSOARG00000007971	5.60748	0.480645	167.544	17.1078	3.2918	2.5006e-08	8.8721e-06	CD55	CD55 molecule, decay accelerating factor for complement (Cromer blood group) [Source:HGNC Symbol;Acc:HGNC:2665]
ENSOARG00000007977	229.76	57.8685	3117.18	926.104	1.751	0.0014565	0.044257	C1QB	complement component 1, q subcomponent, B chain [Source:HGNC Symbol;Acc:HGNC:1242]
ENSOARG00000007984	7.11675	1.17059	235.059	46.55	2.3362	1.3661e-07	3.4783e-05	NR4A2	nuclear receptor subfamily 4, group A, member 2 [Source:HGNC Symbol;Acc:HGNC:7981]
ENSOARG00000007991	183.889	43.7373	2711.51	753.507	1.8474	0.00053447	0.02109	C1QC	complement component 1, q subcomponent, C chain [Source:HGNC Symbol;Acc:HGNC:1245]
ENSOARG00000008001	22.6201	5.55907	2010	577.497	1.7993	0.00076152	0.027438	C1QA	complement component 1, q subcomponent, A chain [Source:HGNC Symbol;Acc:HGNC:1241]
ENSOARG00000008057	3.92507	1.21958	191.795	73.2161	1.3893	0.0011415	0.037163	TLR3	toll-like receptor 3 [Source:HGNC Symbol;Acc:HGNC:11849]
ENSOARG00000008091	8.64723	1.87299	117.43	31.7418	1.8873	0.0007186	0.026337	HLA-DOA	major histocompatibility complex, class II, DO alpha [Source:HGNC Symbol;Acc:HGNC:4936]
ENSOARG00000008136	7.53686	1.5635	104.933	27.1758	1.9491	0.00033457	0.014849	SUSD3	sushi domain containing 3 [Source:HGNC Symbol;Acc:HGNC:28391]
ENSOARG00000008161	2.4905	0.655055	115.08	35.7986	1.6847	0.00031975	0.014457	FGD3	FYVE, RhoGEF and PH domain containing 3 [Source:HGNC Symbol;Acc:HGNC:16027]
ENSOARG00000008189	3.46628	0.701916	37.7713	8.93934	2.0791	0.0013721	0.042597	PKIB	protein kinase (cAMP-dependent, catalytic) inhibitor beta [Source:HGNC Symbol;Acc:HGNC:9018]
ENSOARG00000008208	1.72715	0.153837	138.445	14.2023	3.2851	1.1599e-10	1.0791e-07	CR2	complement component (3d/Epstein Barr virus) receptor 2 [Source:HGNC Symbol;Acc:HGNC:2336]
ENSOARG00000008232	9.67866	3.19718	470.99	189.588	1.3128	0.00090018	0.030974	GUCY1A3	guanylate cyclase 1, soluble, alpha 3 [Source:HGNC Symbol;Acc:HGNC:4685]
ENSOARG00000008249	58.1376	9.62697	1177.31	238.013	2.3064	7.8545e-06	0.00080848	ASPN	asporin [Source:HGNC Symbol;Acc:HGNC:14872]
ENSOARG00000008262	2.15886	0.501308	204.89	59.3645	1.7872	5.0632e-05	0.0035603	SCN2B	sodium channel, voltage gated, type II beta subunit [Source:HGNC Symbol;Acc:HGNC:10589]
ENSOARG00000008285	14.5593	2.6783	923.779	207.759	2.1526	7.2483e-08	1.9861e-05	ITGA1	integrin, alpha 1 [Source:HGNC Symbol;Acc:HGNC:6134]
ENSOARG00000008332	3.49757	0.471206	51.7388	8.55757	2.596	2.0113e-05	0.0017692	CD27	CD27 molecule [Source:HGNC Symbol;Acc:HGNC:11922]
ENSOARG00000008340	3.88653	1.11767	112.891	40.6053	1.4752	0.0012219	0.039305	TBX21	T-box 21 [Source:HGNC Symbol;Acc:HGNC:11599]
ENSOARG00000008349	2.0484	0.291763	97.7104	15.9649	2.6136	1.3727e-05	0.0013154	TACSTD2	tumor-associated calcium signal transducer 2 [Source:HGNC Symbol;Acc:HGNC:11530]
ENSOARG00000008361	21.1934	42.0743	698.024	1679.54	-1.2667	0.0007505	0.027217	ARSD	arylsulfatase D [Source:HGNC Symbol;Acc:HGNC:717]
ENSOARG00000008380	1.37312	0.031737	11.6802	0.351506	5.0544	0.0007597	0.027438	RAB6B	RAB6B, member RAS oncogene family [Source:HGNC Symbol;Acc:HGNC:14902]
ENSOARG00000008468	1.28984	0.10968	24.2788	2.62184	3.211	0.00041102	0.017412	EMB	embigin [Source:HGNC Symbol;Acc:HGNC:30465]
ENSOARG00000008473	9.82244	2.62225	1093.47	351.601	1.6369	9.8556e-05	0.0058864	PLAU	urokinase-type plasminogen activator precursor [Source:RefSeq peptide;Acc:NP_001157065]
ENSOARG00000008480	31.9013	0.326182	1193.74	14.5056	6.3627	2.647e-05	0.0021704	ALOX15	arachidonate 15-lipoxygenase [Source:HGNC Symbol;Acc:HGNC:433]
ENSOARG00000008507	8.03432	1.76576	292.431	75.1121	1.961	2.3158e-06	0.00031828	ALPL	alkaline phosphatase, liver/bone/kidney [Source:HGNC Symbol;Acc:HGNC:438]
ENSOARG00000008521	2.62161	11.2503	61.5698	329.466	-2.4198	1.1971e-08	5.2649e-06	SHC2	SHC (Src homology 2 domain containing) transforming protein 2 [Source:HGNC Symbol;Acc:HGNC:29869]
ENSOARG00000008526	2.06727	0.509638	135.124	40.6449	1.7331	0.0001808	0.0093849	PIK3AP1	phosphoinositide-3-kinase adaptor protein 1 [Source:HGNC Symbol;Acc:HGNC:30034]
ENSOARG00000008534	21.0723	52.218	187.85	573.803	-1.611	6.0422e-05	0.0040826	PRRX2	paired related homeobox 2 [Source:HGNC Symbol;Acc:HGNC:21338]
ENSOARG00000008554	7.70875	15.6792	844.695	2099.66	-1.3137	0.00047449	0.019257	SLC25A33	solute carrier family 25 member 33 [Source:RefSeq peptide;Acc:NP_001120743]
ENSOARG00000008558	1.60289	8.17292	52.1809	335.99	-2.6868	0.0004373	0.018238	BCO1	beta-carotene oxygenase 1 [Source:HGNC Symbol;Acc:HGNC:13815]
ENSOARG00000008705	1.0486	0.277628	112.611	36.3283	1.6322	0.0015788	0.046745	MICAL2	microtubule associated monooxygenase, calponin and LIM domain containing 2 [Source:HGNC Symbol;Acc:HGNC:24693]
ENSOARG00000008715	14.6218	3.85294	619.227	200.801	1.6247	4.6763e-05	0.0033731	MTSS1	metastasis suppressor 1 [Source:HGNC Symbol;Acc:HGNC:20443]
ENSOARG00000008802	6.59451	2.16002	491.891	200.486	1.2948	0.0013708	0.042597	SSH2	slingshot protein phosphatase 2 [Source:HGNC Symbol;Acc:HGNC:30580]
ENSOARG00000008878	1.54744	0.162832	29.1331	3.66905	2.9892	0.00012151	0.0068993	CD84	CD84 molecule [Source:HGNC Symbol;Acc:HGNC:1704]
ENSOARG00000008893	2.01508	0.0876409	54.0302	3.01459	4.1637	4.0046e-09	2.061e-06	SLAMF1	signaling lymphocytic activation molecule family member 1 [Source:HGNC Symbol;Acc:HGNC:10903]
ENSOARG00000008903	5.74228	1.1632	147.706	36.3264	2.0236	0.0012919	0.041104	CHN2	chimerin 2 [Source:HGNC Symbol;Acc:HGNC:1944]
ENSOARG00000008908	20.4842	6.31044	217.643	81.1664	1.423	0.0013802	0.042747	-	Uncharacterized protein [Source:UniProtKB/TrEMBL;Acc:W5PGJ7]
ENSOARG00000008967	1.86053	0.325386	61.153	13.3008	2.2009	7.7281e-05	0.004901	SLAMF7	SLAM family member 7 [Source:HGNC Symbol;Acc:HGNC:21394]
ENSOARG00000008984	27.971	4.09393	331.282	60.2868	2.4581	1.3499e-06	0.00021066	CD3E	CD3e molecule, epsilon (CD3-TCR complex) [Source:HGNC Symbol;Acc:HGNC:1674]
ENSOARG00000009000	2.68895	0.634583	168.259	47.3904	1.828	4.4387e-05	0.0032437	ITGAM	integrin alpha-M precursor [Source:RefSeq peptide;Acc:NP_001076062]
ENSOARG00000009009	5.76335	1.15708	114.821	28.5094	2.0099	2.1034e-05	0.0018042	CD244	CD244 molecule, natural killer cell receptor 2B4 [Source:HGNC Symbol;Acc:HGNC:18171]
ENSOARG00000009042	4.2839	1.48577	385.15	161.317	1.2555	0.0013168	0.041637	-	Uncharacterized protein [Source:UniProtKB/TrEMBL;Acc:W5PGZ6]
ENSOARG00000009045	3.08939	0.799168	100.417	30.8459	1.7028	0.00047103	0.019149	FRMD3	FERM domain containing 3 [Source:HGNC Symbol;Acc:HGNC:24125]
ENSOARG00000009058	13.8027	3.41758	203.04	62.3066	1.7043	9.499e-05	0.0057299	CREB5	cAMP responsive element binding protein 5 [Source:HGNC Symbol;Acc:HGNC:16844]
ENSOARG00000009084	9.15254	2.4395	311.608	102.066	1.6102	7.9723e-05	0.0049922	RUNX1T1	runt-related transcription factor 1; translocated to, 1 (cyclin D-related) [Source:HGNC Symbol;Acc:HGNC:1535]
ENSOARG00000009108	1.53023	0.381929	91.7165	27.0256	1.7629	0.00025114	0.012005	KANK4	KN motif and ankyrin repeat domains 4 [Source:HGNC Symbol;Acc:HGNC:27263]
ENSOARG00000009130	1.11774	0.238361	70.4269	18.5371	1.9257	0.00025629	0.012108	ITGAX	integrin, alpha X (complement component 3 receptor 4 subunit) [Source:HGNC Symbol;Acc:HGNC:6152]
ENSOARG00000009172	11.5067	1.48221	104.594	16.4534	2.6684	1.9641e-07	4.5682e-05	CD3D	CD3d molecule, delta (CD3-TCR complex) [Source:HGNC Symbol;Acc:HGNC:1673]
ENSOARG00000009194	0.681384	2.3885	54.0678	223.703	-2.0487	7.6432e-06	0.0007969	ATP10A	ATPase, class V, type 10A [Source:HGNC Symbol;Acc:HGNC:13542]
ENSOARG00000009234	3.08556	0.711557	145.249	41.4999	1.8073	5.4335e-05	0.0037767	AHR	aryl hydrocarbon receptor [Source:HGNC Symbol;Acc:HGNC:348]
ENSOARG00000009250	0.922151	0.129333	57.789	10.0461	2.5242	1.6996e-05	0.0015514	ITGAD	integrin, alpha D [Source:HGNC Symbol;Acc:HGNC:6146]
ENSOARG00000009256	9.65472	0.963104	106.571	13.2668	3.0059	0.00010787	0.0062871	CD3G	CD3g molecule, gamma (CD3-TCR complex) [Source:HGNC Symbol;Acc:HGNC:1675]
ENSOARG00000009301	22.9656	4.0314	936.898	202.327	2.2112	2.6985e-06	0.00035453	COLEC12	collectin sub-family member 12 [Source:HGNC Symbol;Acc:HGNC:16016]
ENSOARG00000009341	14.6833	2.1646	314.786	55.8344	2.4951	1.3052e-08	5.5388e-06	DKK3	dickkopf WNT signaling pathway inhibitor 3 [Source:HGNC Symbol;Acc:HGNC:2893]
ENSOARG00000009399	6.25997	1.83287	651.104	230.197	1.5	0.00014546	0.0079424	ARHGAP30	Rho GTPase activating protein 30 [Source:HGNC Symbol;Acc:HGNC:27414]
ENSOARG00000009401	45.9386	6.61229	1238.85	221.162	2.4858	5.2743e-10	3.866e-07	PTGER4	prostaglandin E receptor 4 (subtype EP4) [Source:HGNC Symbol;Acc:HGNC:9596]
ENSOARG00000009551	6.25165	1.1689	282.358	64.0623	2.14	4.0488e-07	7.6677e-05	FYB	FYN binding protein [Source:HGNC Symbol;Acc:HGNC:4036]
ENSOARG00000009599	26.591	1.89983	710.694	62.2261	3.5136	3.163e-15	1.093e-11	ALDH1A3	aldehyde dehydrogenase 1 family, member A3 [Source:HGNC Symbol;Acc:HGNC:409]
ENSOARG00000009653	25.6621	7.69081	688.049	235.261	1.5483	7.987e-05	0.0049922	RGS2	regulator of G-protein signaling 2 [Source:HGNC Symbol;Acc:HGNC:9998]
ENSOARG00000009675	4.45395	9.49764	340.565	890.649	-1.3869	0.00035109	0.01533	HOXA10	homeobox A10 [Source:HGNC Symbol;Acc:HGNC:5100]
ENSOARG00000009682	1.27601	0.318765	117.908	35.1804	1.7448	0.00022922	0.011134	RICTOR	RPTOR independent companion of MTOR, complex 2 [Source:HGNC Symbol;Acc:HGNC:28611]
ENSOARG00000009686	22.3727	4.05639	2565.61	561.442	2.1921	0.0013555	0.042471	ADAMTS4	ADAM metallopeptidase with thrombospondin type 1 motif, 4 [Source:HGNC Symbol;Acc:HGNC:220]
ENSOARG00000009779	210.727	63.0144	2947.19	1097.61	1.425	0.00015822	0.008467	CFD	complement factor D (adipsin) [Source:HGNC Symbol;Acc:HGNC:2771]
ENSOARG00000009791	15.7554	1.13287	229.476	21.8234	3.3944	4.5144e-07	8.3358e-05	RGS1	regulator of G-protein signaling 1 [Source:HGNC Symbol;Acc:HGNC:9991]
ENSOARG00000009800	61.5977	20.8885	282.018	116.134	1.28	0.001641	0.048046	FCER1G	Fc fragment of IgE, high affinity I, receptor for; gamma polypeptide [Source:HGNC Symbol;Acc:HGNC:3611]
ENSOARG00000009827	6.38493	0.654293	124.592	16.1866	2.9443	6.683e-09	3.0501e-06	VASH2	vasohibin 2 [Source:HGNC Symbol;Acc:HGNC:25723]
ENSOARG00000009905	3.00372	0.806517	77.3103	24.275	1.6712	0.00095181	0.032427	MBOAT1	membrane bound O-acyltransferase domain containing 1 [Source:HGNC Symbol;Acc:HGNC:21579]
ENSOARG00000009914	2.34549	0.586305	131.782	39.567	1.7358	0.00021593	0.010638	FRMD4B	FERM domain containing 4B [Source:HGNC Symbol;Acc:HGNC:24886]
ENSOARG00000009921	53.2981	15.8156	362.956	129.126	1.491	0.00025521	0.012104	NGFRAP1	nerve growth factor receptor (TNFRSF16) associated protein 1 [Source:HGNC Symbol;Acc:HGNC:13388]
ENSOARG00000009932	7.31144	1.45552	506.634	123.11	2.041	3.153e-05	0.0024762	-//-
ENSOARG00000009949	21.7649	2.67015	685.535	99.8858	2.7789	6.1349e-05	0.0041221	SKAP2	src kinase associated phosphoprotein 2 [Source:HGNC Symbol;Acc:HGNC:15687]
ENSOARG00000009957	8.14222	2.49268	241.113	89.5592	1.4288	0.00093063	0.031949	CREB3L2	cAMP responsive element binding protein 3-like 2 [Source:HGNC Symbol;Acc:HGNC:23720]
ENSOARG00000009969	103.461	197.013	864.143	2038.05	-1.2379	0.00096819	0.032893	UBE2L6	ubiquitin-conjugating enzyme E2L 6 [Source:HGNC Symbol;Acc:HGNC:12490]
ENSOARG00000009972	9.41601	2.8364	563.838	207.618	1.4413	0.00023014	0.011156	FMNL1	formin-like 1 [Source:HGNC Symbol;Acc:HGNC:1212]
ENSOARG00000009973	37.8049	12.8871	2089.62	849.269	1.2989	0.00064119	0.024196	EMILIN2	elastin microfibril interfacer 2 [Source:HGNC Symbol;Acc:HGNC:19881]
ENSOARG00000009999	1007.5	249.664	17082.7	5364.09	1.6711	0.0012512	0.040034	JUN	jun proto-oncogene [Source:HGNC Symbol;Acc:HGNC:6204]
ENSOARG00000010070	10.1207	2.18768	201.843	51.7781	1.9628	6.9975e-06	0.00075228	-	Uncharacterized protein [Source:UniProtKB/TrEMBL;Acc:W5PK31]
ENSOARG00000010080	5.60121	1.0269	649.915	140.282	2.2119	0.00094754	0.032415	SULF2	sulfatase 2 [Source:HGNC Symbol;Acc:HGNC:20392]
ENSOARG00000010094	5.04229	0.78329	85.5901	15.5295	2.4624	3.5223e-06	0.00042585	FCGR2B	low affinity immunoglobulin gamma Fc region receptor II-b precursor [Source:RefSeq peptide;Acc:NP_001132925]
ENSOARG00000010118	14.7404	3.37786	707.074	192.908	1.8739	2.2333e-06	0.00031047	VWA5A	von Willebrand factor A domain containing 5A [Source:HGNC Symbol;Acc:HGNC:6658]
ENSOARG00000010184	26.4078	49.5001	590.183	1354.98	-1.199	0.0010748	0.035469	AK4	adenylate kinase 4 [Source:HGNC Symbol;Acc:HGNC:363]
ENSOARG00000010199	4.02761	0.619662	75.7966	14.5006	2.386	8.8816e-06	0.00090267	EGR3	early growth response 3 [Source:HGNC Symbol;Acc:HGNC:3240]
ENSOARG00000010318	1.47147	0.171663	40.0785	6.23537	2.6843	4.3369e-05	0.003179	SVOPL	SVOP-like [Source:HGNC Symbol;Acc:HGNC:27034]
ENSOARG00000010344	12.8986	1.8381	1114.44	188.141	2.5664	7.3075e-08	1.9861e-05	LTBP1	latent transforming growth factor beta binding protein 1 [Source:HGNC Symbol;Acc:HGNC:6714]
ENSOARG00000010410	1.2209	0.167262	60.3358	9.95628	2.5993	1.2519e-05	0.0012113	SP4	Sp4 transcription factor [Source:HGNC Symbol;Acc:HGNC:11209]
ENSOARG00000010448	3.0743	0.370234	220.854	31.3839	2.815	1.0265e-09	6.5341e-07	ERBB3	erb-b2 receptor tyrosine kinase 3 [Source:HGNC Symbol;Acc:HGNC:3431]
ENSOARG00000010462	45.6989	3.12415	874.229	76.2778	3.5187	6.4055e-14	1.5075e-10	CXCR4	C-X-C chemokine receptor type 4 [Source:RefSeq peptide;Acc:NP_001264097]
ENSOARG00000010473	7.1004	1.64518	424.644	117.62	1.8521	6.0356e-06	0.00067365	EPB41L3	erythrocyte membrane protein band 4.1-like 3 [Source:HGNC Symbol;Acc:HGNC:3380]
ENSOARG00000010493	152.389	11.9529	3978.94	389.501	3.3527	1.1081e-16	6.7007e-13	ATF3	activating transcription factor 3 [Source:HGNC Symbol;Acc:HGNC:785]
ENSOARG00000010521	1.33446	0.159166	59.5805	8.59515	2.7932	2.8583e-06	0.00035823	PDE4B	phosphodiesterase 4B, cAMP-specific [Source:HGNC Symbol;Acc:HGNC:8781]
ENSOARG00000010543	5.55052	1.63106	479.331	172.099	1.4778	0.00020472	0.01021	PREX1	phosphatidylinositol-3,4,5-trisphosphate-dependent Rac exchange factor 1 [Source:HGNC Symbol;Acc:HGNC:32594]
ENSOARG00000010545	3.7778	0.439846	98.1095	13.9878	2.8102	5.1671e-05	0.0036124	ENPP5	ectonucleotide pyrophosphatase/phosphodiesterase 5 (putative) [Source:HGNC Symbol;Acc:HGNC:13717]
ENSOARG00000010631	8.35283	1.23845	319.927	57.8076	2.4684	6.6138e-09	3.0501e-06	DOK2	docking protein 2, 56kDa [Source:HGNC Symbol;Acc:HGNC:2991]
ENSOARG00000010643	5.19096	0.811725	108.216	20.1816	2.4228	1.6118e-06	0.00024368	TIMD4	T-cell immunoglobulin and mucin domain containing 4 [Source:HGNC Symbol;Acc:HGNC:25132]
ENSOARG00000010664	4.51348	0.789326	171.1	37.0533	2.2072	1.4487e-06	0.00022179	MID1	midline 1 [Source:HGNC Symbol;Acc:HGNC:7095]
ENSOARG00000010787	1237.01	2451.27	47634.1	115543	-1.2784	0.00047963	0.019392	ACSS2	acyl-CoA synthetase short-chain family member 2 [Source:HGNC Symbol;Acc:HGNC:15814]
ENSOARG00000010834	7.02097	1.62289	398.315	111.497	1.8369	7.2145e-06	0.00076725	HMHA1	histocompatibility (minor) HA-1 [Source:HGNC Symbol;Acc:HGNC:17102]
ENSOARG00000010939	9.60733	0.264042	317.542	10.514	4.9166	4.989e-08	1.4717e-05	NR4A3	nuclear receptor subfamily 4, group A, member 3 [Source:HGNC Symbol;Acc:HGNC:7982]
ENSOARG00000010944	121.524	7.71972	947.616	67.491	3.8115	9.5957e-06	0.00095649	LOC101108797	Uncharacterized protein [Source:UniProtKB/TrEMBL;Acc:W5PMR1]Ovis aries hemoglobin subunit alpha-1/2 (LOC101108797), mRNA
ENSOARG00000010959	2.70665	0.380358	70.4082	12.6087	2.4813	6.8987e-06	0.00074805	SCML4	sex comb on midleg-like 4 (Drosophila) [Source:HGNC Symbol;Acc:HGNC:21397]
ENSOARG00000011019	7.47591	23.5868	114.007	436.87	-1.9381	1.9098e-06	0.00027998	CLCF1	cardiotrophin-like cytokine factor 1 [Source:HGNC Symbol;Acc:HGNC:17412]
ENSOARG00000011056	5.60427	37.8369	131.684	1081.89	-3.0384	6.8555e-14	1.5075e-10	IRX5	iroquois homeobox 5 [Source:HGNC Symbol;Acc:HGNC:14361]
ENSOARG00000011110	95.1373	13.8242	939.594	175.78	2.4183	2.4118e-09	1.389e-06	RGS5	regulator of G-protein signaling 5 [Source:HGNC Symbol;Acc:HGNC:10001]
ENSOARG00000011128	7.4501	20.5919	518.114	1732.99	-1.7419	4.7685e-06	0.0005519	-	Cystathionine beta-synthase [Source:UniProtKB/TrEMBL;Acc:W5PNA9]
ENSOARG00000011146	1.18331	0.155001	48.0189	7.41691	2.6947	0.00019204	0.0098419	PADI2	peptidyl arginine deiminase, type II [Source:HGNC Symbol;Acc:HGNC:18341]
ENSOARG00000011171	1.49547	0.0911627	50.1083	4.114	3.6064	0.00027231	0.012667	ITK	IL2-inducible T-cell kinase [Source:HGNC Symbol;Acc:HGNC:6171]
ENSOARG00000011188	0.882513	1.85608	93.0314	234.833	-1.3358	0.0011743	0.038179	MYH7B	myosin, heavy chain 7B, cardiac muscle, beta [Source:HGNC Symbol;Acc:HGNC:15906]
ENSOARG00000011217	5.29139	1.2484	142.939	39.8242	1.8437	4.7765e-05	0.0034183	SLC37A2	solute carrier family 37 (glucose-6-phosphate transporter), member 2 [Source:HGNC Symbol;Acc:HGNC:20644]
ENSOARG00000011235	84.419	15.6785	3204.98	746.787	2.1015	5.6326e-08	1.6415e-05	-	Uncharacterized protein [Source:UniProtKB/TrEMBL;Acc:W5PNM3]
ENSOARG00000011239	3.06423	0.100707	76.3173	3.36975	4.5013	7.7104e-12	1.0361e-08	IL7R	interleukin 7 receptor [Source:HGNC Symbol;Acc:HGNC:6024]
ENSOARG00000011251	0.397113	11.5131	3.72179	130.301	-5.1297	0.00022535	0.010991	TPBGL	trophoblast glycoprotein-like [Source:HGNC Symbol;Acc:HGNC:44159]
ENSOARG00000011352	10.2559	20.311	758.951	1831.37	-1.2708	0.00071792	0.026337	MST1R	macrophage stimulating 1 receptor [Source:HGNC Symbol;Acc:HGNC:7381]
ENSOARG00000011380	106.608	32.7517	7790.07	2940.9	1.4054	0.00016632	0.0087839	ADGRF5	adhesion G protein-coupled receptor F5 [Source:HGNC Symbol;Acc:HGNC:19030]
ENSOARG00000011432	1.02862	2.65547	46.1286	144.205	-1.6444	0.00022538	0.010991	GINS2	GINS complex subunit 2 (Psf2 homolog) [Source:HGNC Symbol;Acc:HGNC:24575]
ENSOARG00000011437	7.87462	1.82233	187.516	53.4741	1.8101	0.00017019	0.0089301	TBC1D10C	TBC1 domain family, member 10C [Source:HGNC Symbol;Acc:HGNC:24702]
ENSOARG00000011464	1.47703	7.89341	38.3697	249.286	-2.6998	1.1257e-09	6.9822e-07	SYT17	synaptotagmin XVII [Source:HGNC Symbol;Acc:HGNC:24119]
ENSOARG00000011565	11.4739	25.9234	568.591	1558.08	-1.4543	0.00013326	0.0074619	LIG1	ligase I, DNA, ATP-dependent [Source:HGNC Symbol;Acc:HGNC:6598]
ENSOARG00000011624	3.70961	15.2573	52.3358	265.705	-2.344	7.7496e-05	0.004901	FAM78B	family with sequence similarity 78, member B [Source:HGNC Symbol;Acc:HGNC:13495]
ENSOARG00000011660	7.94528	1.78178	418.083	113.201	1.8849	4.951e-06	0.0005649	RECK	reversion-inducing-cysteine-rich protein with kazal motifs [Source:HGNC Symbol;Acc:HGNC:11345]
ENSOARG00000011683	2.57286	8.20968	55.4993	220.103	-1.9876	4.1524e-06	0.00048758	DTX4	deltex 4, E3 ubiquitin ligase [Source:HGNC Symbol;Acc:HGNC:29151]
ENSOARG00000011738	7.36571	2.0274	122.367	41.1779	1.5713	0.00087835	0.03057	-	Uncharacterized protein [Source:UniProtKB/TrEMBL;Acc:W5PQ53]
ENSOARG00000011743	14.9456	3.06401	482.703	117.501	2.0385	5.5139e-07	9.8071e-05	MPEG1	macrophage expressed 1 [Source:HGNC Symbol;Acc:HGNC:29619]
ENSOARG00000011756	52.6258	10.5223	3051.44	743.335	2.0374	3.4448e-05	0.0026537	HSPH1	heat shock 105kDa/110kDa protein 1 [Source:HGNC Symbol;Acc:HGNC:16969]
ENSOARG00000011768	1.2991	0.136151	90.8438	11.9273	2.9291	6.4651e-08	1.8184e-05	CYFIP2	cytoplasmic FMR1 interacting protein 2 [Source:HGNC Symbol;Acc:HGNC:13760]
ENSOARG00000011842	13.3203	3.10241	158.401	43.5308	1.8635	3.0349e-05	0.0024069	LAT2	linker for activation of T cells family, member 2 [Source:HGNC Symbol;Acc:HGNC:12749]
ENSOARG00000011857	9.50832	2.21014	182.486	52.0391	1.8101	3.9449e-05	0.0029634	-	Uncharacterized protein [Source:UniProtKB/TrEMBL;Acc:W5PQJ2]
ENSOARG00000011865	28.7137	73.5316	1930.34	6078.21	-1.6548	1.449e-05	0.0013558	ERBB2	erb-b2 receptor tyrosine kinase 2 [Source:HGNC Symbol;Acc:HGNC:3430]
ENSOARG00000011933	30.0891	8.22916	619.657	206.274	1.5869	4.011e-05	0.0030038	ADAP2	ArfGAP with dual PH domains 2 [Source:HGNC Symbol;Acc:HGNC:16487]
ENSOARG00000011939	33.636	9.33309	483.694	156.249	1.6303	4.3336e-05	0.003179	PROCR	protein C receptor, endothelial [Source:HGNC Symbol;Acc:HGNC:9452]
ENSOARG00000011944	6.89332	1.55055	81.7282	22.8629	1.8378	0.00032278	0.014539	SIT1	signaling threshold regulating transmembrane adaptor 1 [Source:HGNC Symbol;Acc:HGNC:17710]
ENSOARG00000012064	30.7727	6.37273	547.35	143.611	1.9303	1.7305e-06	0.00025681	FIGF	c-fos induced growth factor (vascular endothelial growth factor D) [Source:HGNC Symbol;Acc:HGNC:3708]
ENSOARG00000012094	4.77105	0.791683	73.5681	14.6885	2.3244	2.276e-05	0.0019116	FHL5	four and a half LIM domains 5 [Source:HGNC Symbol;Acc:HGNC:17371]
ENSOARG00000012131	1.07685	0.100852	29.6909	3.72126	2.9962	0.0001034	0.0061002	IKZF3	IKAROS family zinc finger 3 (Aiolos) [Source:HGNC Symbol;Acc:HGNC:13178]
ENSOARG00000012145	9.28836	2.26068	287.389	87.1181	1.722	3.1494e-05	0.0024762	WAS	Wiskott-Aldrich syndrome [Source:HGNC Symbol;Acc:HGNC:12731]
ENSOARG00000012178	0.0783927	1.0634	1.15419	18.6678	-4.0156	6.6768e-05	0.0043768	HPSE2	heparanase 2 (inactive) [Source:HGNC Symbol;Acc:HGNC:18374]
ENSOARG00000012180	19.0433	4.41622	1425.8	408.287	1.8041	6.6146e-05	0.0043577	FLT1	fms-related tyrosine kinase 1 [Source:HGNC Symbol;Acc:HGNC:3763]
ENSOARG00000012274	6.13253	1.44164	101.251	29.5712	1.7757	0.00020808	0.010335	TBXA2R	thromboxane A2 receptor [Source:HGNC Symbol;Acc:HGNC:11608]
ENSOARG00000012299	6.47129	2.10562	271.26	105.519	1.3622	0.0010165	0.033914	TLE1	transducin-like enhancer of split 1 (E(sp1) homolog, Drosophila) [Source:HGNC Symbol;Acc:HGNC:11837]
ENSOARG00000012314	1.89036	12.5822	20.9735	177.591	-3.0819	1.2696e-08	5.4838e-06	EN1	engrailed homeobox 1 [Source:HGNC Symbol;Acc:HGNC:3342]
ENSOARG00000012344	99.4361	20.6305	3656.56	938.36	1.9623	7.1018e-05	0.0046055	PPP1R15A	protein phosphatase 1, regulatory subunit 15A [Source:HGNC Symbol;Acc:HGNC:14375]
ENSOARG00000012355	7.63883	2.51517	207.598	81.7687	1.3442	0.0014883	0.044843	WEE1	WEE1 G2 checkpoint kinase [Source:HGNC Symbol;Acc:HGNC:12761]
ENSOARG00000012360	63.6499	16.6552	1459.39	473.314	1.6245	7.1846e-05	0.0046467	ELK3	ELK3, ETS-domain protein (SRF accessory protein 2) [Source:HGNC Symbol;Acc:HGNC:3325]
ENSOARG00000012362	2.64408	0.398694	73.3534	12.7211	2.5276	5.0378e-06	0.00057211	TC2N	tandem C2 domains, nuclear [Source:HGNC Symbol;Acc:HGNC:19859]
ENSOARG00000012367	14.8355	4.2826	606.143	209.662	1.5316	0.00010768	0.0062871	ITGB2	integrin, beta 2 (complement component 3 receptor 3 and 4 subunit) [Source:HGNC Symbol;Acc:HGNC:6155]
ENSOARG00000012373	2.50207	0.717232	259.621	86.9815	1.5776	0.00098323	0.033094	ADAM19	ADAM metallopeptidase domain 19 [Source:HGNC Symbol;Acc:HGNC:197]
ENSOARG00000012392	29.1182	10.3744	2094.66	902.682	1.2144	0.0015274	0.045612	MRC2	mannose receptor, C type 2 [Source:HGNC Symbol;Acc:HGNC:16875]
ENSOARG00000012400	19.3109	6.09143	1033.41	390.608	1.4036	0.00020108	0.010074	-//-
ENSOARG00000012408	9.31615	3.13938	354.519	143.977	1.3	0.0011308	0.036962	PARP12	poly (ADP-ribose) polymerase family, member 12 [Source:HGNC Symbol;Acc:HGNC:21919]
ENSOARG00000012461	58.8543	7.47947	1456.35	229.398	2.6664	2.4886e-11	3.0099e-08	FBLN5	fibulin 5 [Source:HGNC Symbol;Acc:HGNC:3602]
ENSOARG00000012490	808.037	1827.39	4433.74	12289.1	-1.4708	9.1198e-05	0.0055373	DBI	diazepam binding inhibitor (GABA receptor modulator, acyl-CoA binding protein) [Source:HGNC Symbol;Acc:HGNC:2690]
ENSOARG00000012515	3.85375	0.676494	393.963	83.5272	2.2377	9.1763e-08	2.4663e-05	PCSK5	proprotein convertase subtilisin/kexin type 5 [Source:HGNC Symbol;Acc:HGNC:8747]
ENSOARG00000012532	2.36459	0.473038	39.0024	9.41456	2.0506	0.0009985	0.03341	DNASE1L3	deoxyribonuclease I-like 3 [Source:HGNC Symbol;Acc:HGNC:2959]
ENSOARG00000012667	25.7857	56.9234	507.178	1355.88	-1.4187	0.00025724	0.012129	NFIC	nuclear factor I/C (CCAAT-binding transcription factor) [Source:HGNC Symbol;Acc:HGNC:7786]
ENSOARG00000012732	10.6558	3.21834	264.707	96.6042	1.4542	0.00039131	0.016843	CDK8	cyclin-dependent kinase 8 [Source:HGNC Symbol;Acc:HGNC:1779]
ENSOARG00000012784	101.099	35.2607	1804.9	752.91	1.2614	0.00081179	0.02875	HTRA3	HtrA serine peptidase 3 [Source:HGNC Symbol;Acc:HGNC:30406]
ENSOARG00000012918	5.64724	1.43776	171.32	53.9154	1.6679	0.00015901	0.0084866	TRAF3IP3	TRAF3 interacting protein 3 [Source:HGNC Symbol;Acc:HGNC:30766]
ENSOARG00000013010	61.4963	174.939	1309.84	4502.09	-1.7812	2.1669e-06	0.00030297	MVD	mevalonate (diphospho) decarboxylase [Source:HGNC Symbol;Acc:HGNC:7529]
ENSOARG00000013018	3.6029	25.4935	15.4818	137.466	-3.1504	1.4519e-07	3.6583e-05	S100G	S100 calcium binding protein G [Source:HGNC Symbol;Acc:HGNC:1436]
ENSOARG00000013022	15.662	42.2228	198.956	651.284	-1.7108	9.8788e-06	0.00097933	TMEM182	transmembrane protein 182 [Source:HGNC Symbol;Acc:HGNC:26391]
ENSOARG00000013031	6.45353	0.932549	119.245	19.7004	2.5976	2.3054e-07	5.2116e-05	TMEM255A	transmembrane protein 255A [Source:HGNC Symbol;Acc:HGNC:26086]
ENSOARG00000013079	1.02885	0.0912428	32.7763	3.75884	3.1243	3.5377e-05	0.0026992	IL18RAP	interleukin 18 receptor accessory protein [Source:HGNC Symbol;Acc:HGNC:5989]
ENSOARG00000013151	16.1555	55.1024	722.412	3003.46	-2.0557	1.5944e-07	3.976e-05	MST1	macrophage stimulating 1 [Source:HGNC Symbol;Acc:HGNC:7380]
ENSOARG00000013157	59.4577	20.0748	1349.87	543.479	1.3125	0.0012645	0.040351	TIMP1	TIMP metallopeptidase inhibitor 1 [Source:HGNC Symbol;Acc:HGNC:11820]
ENSOARG00000013173	1.59712	0.22217	179.082	30.6474	2.5468	3.947e-08	1.224e-05	DOCK8	dedicator of cytokinesis 8 [Source:HGNC Symbol;Acc:HGNC:19191]
ENSOARG00000013176	42.3912	15.009	1051.58	453.406	1.2137	0.0013896	0.042891	FLI1	Fli-1 proto-oncogene, ETS transcription factor [Source:HGNC Symbol;Acc:HGNC:3749]
ENSOARG00000013193	1.56082	6.32106	53.1875	270.733	-2.3477	8.0791e-06	0.00082458	CPZ	carboxypeptidase Z [Source:HGNC Symbol;Acc:HGNC:2333]
ENSOARG00000013298	7.18774	1.98642	248.411	78.6265	1.6596	7.2923e-05	0.0046946	OLFML2A	olfactomedin-like 2A [Source:HGNC Symbol;Acc:HGNC:27270]
ENSOARG00000013317	2.4597	0.462913	262.974	59.2306	2.1505	4.0575e-07	7.6677e-05	TBX18	T-box 18 [Source:HGNC Symbol;Acc:HGNC:11595]
ENSOARG00000013367	1.62778	0.296902	49.9283	11.0933	2.1702	0.00026349	0.012337	CECR1	cat eye syndrome chromosome region, candidate 1 [Source:HGNC Symbol;Acc:HGNC:1839]
ENSOARG00000013374	4.8025	1.69143	554.454	233.502	1.2476	0.0014262	0.043461	CAPN5	calpain 5 [Source:HGNC Symbol;Acc:HGNC:1482]
ENSOARG00000013446	2.49109	0.71762	121.19	43.1214	1.4908	0.0011096	0.03637	SFMBT2	Scm-like with four mbt domains 2 [Source:HGNC Symbol;Acc:HGNC:20256]
ENSOARG00000013482	1.14981	0.0515884	72.041	3.78911	4.2489	2.3608e-06	0.00032263	MYRF	myelin regulatory factor [Source:HGNC Symbol;Acc:HGNC:1181]
ENSOARG00000013509	1.67727	0.285145	163.738	32.4824	2.3337	3.8749e-07	7.6677e-05	CD274	CD274 molecule [Source:HGNC Symbol;Acc:HGNC:17635]
ENSOARG00000013529	7.07669	2.35343	306.083	123.907	1.3047	0.0011393	0.037142	ADGRL4	adhesion G protein-coupled receptor L4 [Source:HGNC Symbol;Acc:HGNC:20822]
ENSOARG00000013573	10.0878	2.73822	100.573	33.7371	1.5758	0.00088207	0.030656	TNFAIP8L2	tumor necrosis factor, alpha-induced protein 8-like 2 [Source:HGNC Symbol;Acc:HGNC:26277]
ENSOARG00000013631	3.28053	0.620986	163.496	39.0779	2.0648	4.665e-06	0.00054251	FAM65C	family with sequence similarity 65, member C [Source:HGNC Symbol;Acc:HGNC:16168]
ENSOARG00000013634	69.9939	131.513	384.581	892.305	-1.2142	0.0016278	0.047901	DDTL	D-dopachrome tautomerase-like [Source:HGNC Symbol;Acc:HGNC:33446]
ENSOARG00000013646	6.06925	0.833823	217.942	36.3906	2.5823	7.5451e-09	3.3798e-06	ZAP70	zeta-chain (TCR) associated protein kinase 70kDa [Source:HGNC Symbol;Acc:HGNC:12858]
ENSOARG00000013647	81.6695	160.323	1780.73	4263.63	-1.2596	0.00084851	0.029746	ACAD8	acyl-CoA dehydrogenase family, member 8 [Source:HGNC Symbol;Acc:HGNC:87]
ENSOARG00000013669	1.20105	0.177671	37.1544	6.44487	2.5273	0.00018291	0.0094339	NPY1R	neuropeptide Y receptor Y1 [Source:HGNC Symbol;Acc:HGNC:7956]
ENSOARG00000013694	37.5626	10.8164	502.91	177.99	1.4985	0.00015336	0.0082805	EMCN	endomucin [Source:HGNC Symbol;Acc:HGNC:16041]
ENSOARG00000013739	2.72559	5.91526	149.86	407.9	-1.4446	0.00032833	0.01468	TUBA8	tubulin, alpha 8 [Source:HGNC Symbol;Acc:HGNC:12410]
ENSOARG00000013744	22.1304	72.8205	339.933	1314.34	-1.951	1.4815e-06	0.00022539	-	Uncharacterized protein [Source:UniProtKB/TrEMBL;Acc:W5PWA6]
ENSOARG00000013752	1.81096	5.39007	23.0649	82.9293	-1.8462	0.00019426	0.0099132	NOG	noggin [Source:HGNC Symbol;Acc:HGNC:7866]
ENSOARG00000013918	1.17101	0.272877	46.2272	12.8522	1.8467	0.0015252	0.045603	IL12RB1	interleukin 12 receptor, beta 1 [Source:HGNC Symbol;Acc:HGNC:5971]
ENSOARG00000013931	7.52263	1.88886	279.822	88.9634	1.6532	0.00089922	0.030974	SH3BP1	SH3-domain binding protein 1 [Source:HGNC Symbol;Acc:HGNC:10824]
ENSOARG00000013959	1.05402	5.59503	21.7119	140.359	-2.6926	0.00055749	0.021785	CTBS	chitobiase, di-N-acetyl- [Source:HGNC Symbol;Acc:HGNC:2496]
ENSOARG00000014023	2.36089	0.303302	45.3333	7.03148	2.6887	3.3999e-05	0.0026275	CCR8	chemokine (C-C motif) receptor 8 [Source:HGNC Symbol;Acc:HGNC:1609]
ENSOARG00000014042	12.7472	4.28231	762.793	311.548	1.2918	0.00069742	0.025716	MYO1B	myosin IB [Source:HGNC Symbol;Acc:HGNC:7596]
ENSOARG00000014069	32.1404	9.85632	628.965	238.123	1.4013	0.00032538	0.014575	-	Uncharacterized protein [Source:UniProtKB/TrEMBL;Acc:W5PXC6]
ENSOARG00000014085	7.22258	0.119354	50.7266	1.09576	5.5327	5.4087e-11	5.6883e-08	SH2D1A	SH2 domain containing 1A [Source:HGNC Symbol;Acc:HGNC:10820]
ENSOARG00000014103	16.206	2.94151	359.624	82.6508	2.1214	7.2974e-05	0.0046946	NOCT	nocturnin [Source:HGNC Symbol;Acc:HGNC:14254]
ENSOARG00000014123	151.946	7.95438	3842.17	220.919	4.1203	2.698e-16	1.3052e-12	PI16	peptidase inhibitor 16 [Source:HGNC Symbol;Acc:HGNC:21245]
ENSOARG00000014188	8.00003	2.39276	472.936	171.101	1.4668	0.00023864	0.011522	ENPP1	ectonucleotide pyrophosphatase/phosphodiesterase 1 [Source:HGNC Symbol;Acc:HGNC:3356]
ENSOARG00000014198	127.29	247.633	2955.01	7200.94	-1.285	0.00075037	0.027217	GCAT	glycine C-acetyltransferase [Source:HGNC Symbol;Acc:HGNC:4188]
ENSOARG00000014214	1.50099	0.126996	28.8957	2.92845	3.3026	5.034e-05	0.0035566	CCR5	chemokine (C-C motif) receptor 5 (gene/pseudogene) [Source:HGNC Symbol;Acc:HGNC:1606]
ENSOARG00000014236	1.11774	0.0275453	22.747	0.703012	5.016	7.2637e-06	0.00076725	CCR2	chemokine (C-C motif) receptor 2 [Source:HGNC Symbol;Acc:HGNC:1603]
ENSOARG00000014277	1.67573	0.169232	31.4023	4.15158	2.9191	8.9033e-05	0.0054522	CXCR6	chemokine (C-X-C motif) receptor 6 [Source:HGNC Symbol;Acc:HGNC:16647]
ENSOARG00000014288	3.88562	1.07294	137.843	45.9345	1.5854	0.00041474	0.017507	FGD2	FYVE, RhoGEF and PH domain containing 2 [Source:HGNC Symbol;Acc:HGNC:3664]
ENSOARG00000014330	5.66225	0.967786	516.03	109.388	2.238	2.2543e-07	5.1444e-05	ADAMTSL3	ADAMTS-like 3 [Source:HGNC Symbol;Acc:HGNC:14633]
ENSOARG00000014361	4.74963	0.597567	360.474	55.3154	2.7041	2.797e-05	0.0022628	SEMA5A	sema domain, seven thrombospondin repeats (type 1 and type 1-like), transmembrane domain (TM) and short cytoplasmic domain, (semaphorin) 5A [Source:HGNC Symbol;Acc:HGNC:10736]
ENSOARG00000014364	8.50017	1.7143	168.727	40.5432	2.0572	3.7119e-06	0.00044231	-//-
ENSOARG00000014425	4.55374	9.68723	274.297	702.734	-1.3572	0.00048081	0.019392	MERTK	MER proto-oncogene, tyrosine kinase [Source:HGNC Symbol;Acc:HGNC:7027]
ENSOARG00000014433	0.413732	2.51222	17.8904	135.074	-2.9165	2.1434e-08	7.8556e-06	PKD2L1	polycystic kidney disease 2-like 1 [Source:HGNC Symbol;Acc:HGNC:9011]
ENSOARG00000014463	1.11641	0.300322	65.0161	19.858	1.7111	0.0014721	0.044473	WWC1	WW and C2 domain containing 1 [Source:HGNC Symbol;Acc:HGNC:29435]
ENSOARG00000014582	1.35184	0.144128	30.6064	4.06545	2.9123	0.00012298	0.0069666	FASLG	Fas ligand (TNF superfamily, member 6) [Source:HGNC Symbol;Acc:HGNC:11936]
ENSOARG00000014590	3.98158	48.4584	69.2367	989.75	-3.8375	7.3336e-11	7.3913e-08	CRYM	crystallin, mu [Source:HGNC Symbol;Acc:HGNC:2418]
ENSOARG00000014623	24.4499	0.0929981	347.197	1.56367	7.7947	2.0236e-07	4.6617e-05	TCF21	transcription factor 21 [Source:HGNC Symbol;Acc:HGNC:11632]
ENSOARG00000014631	4.02538	0.843979	239.76	61.7287	1.9576	1.3812e-05	0.0013154	JAK3	Janus kinase 3 [Source:HGNC Symbol;Acc:HGNC:6193]
ENSOARG00000014723	0.830854	13.4454	5.09412	101.379	-4.3148	2.7054e-09	1.5219e-06	CXCL14	chemokine (C-X-C motif) ligand 14 [Source:HGNC Symbol;Acc:HGNC:10640]
ENSOARG00000014750	5.20075	0.632983	128.95	18.9528	2.7663	1.797e-08	6.8997e-06	STK17B	serine/threonine kinase 17b [Source:HGNC Symbol;Acc:HGNC:11396]
ENSOARG00000014762	7.20436	1.95251	338.897	110.7	1.6142	7.6945e-05	0.0048979	AFAP1L2	actin filament associated protein 1-like 2 [Source:HGNC Symbol;Acc:HGNC:25901]
ENSOARG00000014774	2.42494	0.416971	75.6993	15.8704	2.2539	2.1268e-05	0.0018118	SOX10	SRY (sex determining region Y)-box 10 [Source:HGNC Symbol;Acc:HGNC:11190]
ENSOARG00000014789	1.91114	8.56856	50.5429	267.313	-2.4029	0.00080078	0.02857	MBOAT2	membrane bound O-acyltransferase domain containing 2 [Source:HGNC Symbol;Acc:HGNC:25193]
ENSOARG00000014822	2.66238	0.352792	73.232	11.7963	2.6341	2.5126e-06	0.00033765	IKZF1	IKAROS family zinc finger 1 (Ikaros) [Source:HGNC Symbol;Acc:HGNC:13176]
ENSOARG00000014824	19.5671	37.7665	522.503	1209.76	-1.2112	0.0013677	0.042593	MVK	mevalonate kinase [Source:HGNC Symbol;Acc:HGNC:7530]
ENSOARG00000014875	2.30834	0.497091	81.8697	21.3469	1.9393	0.00012875	0.0072528	-	Uncharacterized protein [Source:UniProtKB/TrEMBL;Acc:W5PZS1]
ENSOARG00000014898	49.0926	11.3902	3134.8	878.693	1.8349	2.102e-06	0.00029621	ADAMTS1	ADAM metallopeptidase with thrombospondin type 1 motif, 1 [Source:HGNC Symbol;Acc:HGNC:217]
ENSOARG00000014926	5.88219	1.11993	619.755	140.119	2.145	1.0869e-07	2.8577e-05	ADGRD1	adhesion G protein-coupled receptor D1 [Source:HGNC Symbol;Acc:HGNC:19893]
ENSOARG00000014939	340.151	783.489	4372.96	12062.3	-1.4638	8.9318e-05	0.0054558	CLDN15	claudin 15 [Source:HGNC Symbol;Acc:HGNC:2036]
ENSOARG00000014986	77.9187	20.6193	1115.12	359.72	1.6323	2.7157e-05	0.0022044	CYYR1	cysteine/tyrosine-rich 1 [Source:HGNC Symbol;Acc:HGNC:16274]
ENSOARG00000015035	4.99356	1.2026	124.339	37.588	1.7259	0.00024607	0.011787	PDE7B	phosphodiesterase 7B [Source:HGNC Symbol;Acc:HGNC:8792]
ENSOARG00000015037	9.05706	1.95274	116.198	31.3361	1.8907	6.5621e-05	0.0043541	PAWR	PRKC, apoptosis, WT1, regulator [Source:HGNC Symbol;Acc:HGNC:8614]
ENSOARG00000015038	1.69669	12.1982	29.8511	265.317	-3.1519	4.5789e-11	5.0345e-08	SDR16C5	short chain dehydrogenase/reductase family 16C, member 5 [Source:HGNC Symbol;Acc:HGNC:30311]
ENSOARG00000015044	2.67049	0.592732	113.391	29.8	1.9279	5.1352e-05	0.0036004	TLR2	toll-like receptor 2 [Source:HGNC Symbol;Acc:HGNC:11848]
ENSOARG00000015118	1.38283	4.14394	19.2447	69.4603	-1.8517	0.0016934	0.049172	BDNF	brain-derived neurotrophic factor [Source:HGNC Symbol;Acc:HGNC:1033]
ENSOARG00000015144	1.7571	0.183938	55.7397	7.22535	2.9476	2.4421e-06	0.00033001	SERPINA5	serpin peptidase inhibitor, clade A (alpha-1 antiproteinase, antitrypsin), member 5 [Source:HGNC Symbol;Acc:HGNC:8723]
ENSOARG00000015167	14.7407	3.167	165.951	43.5481	1.9301	1.973e-05	0.0017418	BCL2A1	BCL2-related protein A1 [Source:HGNC Symbol;Acc:HGNC:991]
ENSOARG00000015172	1.14132	0.231652	54.3851	13.8425	1.9741	0.0004565	0.018716	FCHO1	FCH domain only 1 [Source:HGNC Symbol;Acc:HGNC:29002]
ENSOARG00000015177	4.56101	1.33253	143.342	50.6763	1.5001	0.00093139	0.031949	IFIT1	interferon-induced protein with tetratricopeptide repeats 1 [Source:HGNC Symbol;Acc:HGNC:5407]
ENSOARG00000015180	5.83965	1.28263	75.5046	19.726	1.9365	0.001506	0.045196	BAMBI	BMP and activin membrane-bound inhibitor homolog precursor [Source:RefSeq peptide;Acc:NP_001009761]
ENSOARG00000015215	1.58676	0.122856	44.8367	4.33813	3.3695	0.00012013	0.0068533	BLK	BLK proto-oncogene, Src family tyrosine kinase [Source:HGNC Symbol;Acc:HGNC:1057]
ENSOARG00000015236	63.706	15.2498	438.322	130.648	1.7463	2.1272e-05	0.0018118	MAFF	v-maf avian musculoaponeurotic fibrosarcoma oncogene homolog F [Source:HGNC Symbol;Acc:HGNC:6780]
ENSOARG00000015246	2.89674	0.734415	166.799	50.6594	1.7192	9.5963e-05	0.0057743	ANKRD44	ankyrin repeat domain 44 [Source:HGNC Symbol;Acc:HGNC:25259]
ENSOARG00000015250	88.2928	175.405	1996.29	4884.03	-1.2908	0.00056434	0.021982	FDFT1	farnesyl-diphosphate farnesyltransferase 1 [Source:HGNC Symbol;Acc:HGNC:3629]
ENSOARG00000015282	2.23014	6.23053	28.2382	94.0718	-1.7361	0.0003068	0.014109	KCTD14	potassium channel tetramerization domain containing 14 [Source:HGNC Symbol;Acc:HGNC:23295]
ENSOARG00000015285	3.681	0.789401	168.081	45.4985	1.8853	3.1795e-05	0.0024889	TMTC2	transmembrane and tetratricopeptide repeat containing 2 [Source:HGNC Symbol;Acc:HGNC:25440]
ENSOARG00000015286	0.944131	0.122248	55.9004	9.07768	2.6225	1.1701e-05	0.0011413	SEMA3A	sema domain, immunoglobulin domain (Ig), short basic domain, secreted, (semaphorin) 3A [Source:HGNC Symbol;Acc:HGNC:10723]
ENSOARG00000015348	1.70024	0.142334	29.1325	2.68969	3.4371	1.8786e-05	0.0016893	GPR171	G protein-coupled receptor 171 [Source:HGNC Symbol;Acc:HGNC:30057]
ENSOARG00000015379	3.56166	0.0215657	62.3844	0.389088	7.3249	1.1033e-14	3.3361e-11	ALX1	ALX homeobox 1 [Source:HGNC Symbol;Acc:HGNC:1494]
ENSOARG00000015412	24.6708	4.43956	131.442	28.1649	2.2225	3.0564e-06	0.0003772	C17orf58	chromosome 17 open reading frame 58 [Source:HGNC Symbol;Acc:HGNC:27568]
ENSOARG00000015432	8.66791	2.0508	309.346	89.4711	1.7897	2.0993e-05	0.0018042	-	Uncharacterized protein [Source:UniProtKB/TrEMBL;Acc:W5Q1G8]
ENSOARG00000015578	4.52847	0.649685	201.486	35.6935	2.4969	3.1449e-08	1.0566e-05	LRRC8C	leucine rich repeat containing 8 family, member C [Source:HGNC Symbol;Acc:HGNC:25075]
ENSOARG00000015592	8.98155	2.4089	139.918	46.0375	1.6037	0.00045305	0.018638	KITLG	KIT ligand [Source:HGNC Symbol;Acc:HGNC:6343]
ENSOARG00000015646	162.097	33.7815	1461.7	372.897	1.9708	5.0189e-07	9.0598e-05	-	Beta-2-microglobulin [Source:UniProtKB/TrEMBL;Acc:W5Q244]
ENSOARG00000015655	0.928754	0.141275	57.8312	9.98289	2.5343	2.0453e-05	0.0017733	OCA2	oculocutaneous albinism II [Source:HGNC Symbol;Acc:HGNC:8101]
ENSOARG00000015701	1.18532	0.187661	35.9984	6.75514	2.4139	0.00031741	0.014432	-	Uncharacterized protein [Source:UniProtKB/TrEMBL;Acc:W5Q2B4]
ENSOARG00000015703	9.88517	0	33.1154	0	Inf	2.7609e-06	0.00035523	-	Uncharacterized protein [Source:UniProtKB/TrEMBL;Acc:W5Q2B5]
ENSOARG00000015715	1.05193	4.57006	21.4133	112.633	-2.3951	0.0012411	0.039817	KERA	keratocan [Source:HGNC Symbol;Acc:HGNC:6309]
ENSOARG00000015718	12.4541	1.73557	807.564	140.224	2.5258	5.0306e-10	3.8026e-07	PTPRC	protein tyrosine phosphatase, receptor type, C [Source:HGNC Symbol;Acc:HGNC:9666]
ENSOARG00000015723	4.64027	1.0063	247.814	65.7845	1.9134	7.045e-06	0.00075403	PLCL1	phospholipase C-like 1 [Source:HGNC Symbol;Acc:HGNC:9063]
ENSOARG00000015727	253.184	90.7875	4700.2	2063.98	1.1873	0.0015234	0.045603	LUM	lumican [Source:HGNC Symbol;Acc:HGNC:6724]
ENSOARG00000015775	6.77834	32.1783	297.106	1699.75	-2.5163	1.2268e-06	0.00019652	GPT2	glutamic pyruvate transaminase (alanine aminotransferase) 2 [Source:HGNC Symbol;Acc:HGNC:18062]
ENSOARG00000015895	0.716733	0.0894962	56.2188	9.00252	2.6427	1.0907e-05	0.0010725	PLXNC1	plexin C1 [Source:HGNC Symbol;Acc:HGNC:9106]
ENSOARG00000015970	4.3576	0.530357	69.3905	9.87881	2.8123	7.3248e-07	0.00012566	SLA2	Src-like-adaptor 2 [Source:HGNC Symbol;Acc:HGNC:17329]
ENSOARG00000015974	6.50714	1.61081	186.558	57.0231	1.71	8.6144e-05	0.0053021	SLC15A3	solute carrier family 15 (oligopeptide transporter), member 3 [Source:HGNC Symbol;Acc:HGNC:18068]
ENSOARG00000016017	9.15519	2.8147	442.665	166.144	1.4138	0.00048308	0.019443	PDE5A	phosphodiesterase 5A, cGMP-specific [Source:HGNC Symbol;Acc:HGNC:8784]
ENSOARG00000016042	375.21	102.809	3309.33	1075.78	1.6212	3.4804e-05	0.0026726	THY1	Thy-1 cell surface antigen [Source:HGNC Symbol;Acc:HGNC:11801]
ENSOARG00000016047	29.205	6.94327	2425.95	684.295	1.8259	2.7217e-06	0.00035453	TGFBR3	transforming growth factor, beta receptor III [Source:HGNC Symbol;Acc:HGNC:11774]
ENSOARG00000016062	4.99575	0.649856	177.507	29.1519	2.6062	1.6176e-08	6.5213e-06	CD6	CD6 molecule [Source:HGNC Symbol;Acc:HGNC:1691]
ENSOARG00000016103	0.572812	1.92851	58.6041	241.703	-2.0442	0.00089312	0.030863	GREB1	growth regulation by estrogen in breast cancer 1 [Source:HGNC Symbol;Acc:HGNC:24885]
ENSOARG00000016109	10.1103	2.03708	388.969	96.6274	2.0091	1.0519e-06	0.00017204	IL2RG	interleukin 2 receptor, gamma [Source:HGNC Symbol;Acc:HGNC:6010]
ENSOARG00000016115	1.66855	0.325703	41.0146	9.32843	2.1364	0.00072626	0.026577	SYT9	synaptotagmin IX [Source:HGNC Symbol;Acc:HGNC:19265]
ENSOARG00000016123	12.5843	3.54217	309.024	105.552	1.5498	0.0001783	0.0092948	2016-09-06	septin 6 [Source:HGNC Symbol;Acc:HGNC:15848]
ENSOARG00000016133	2.29189	0.416534	152.059	33.651	2.1759	2.9305e-06	0.00036539	NCKAP1L	NCK-associated protein 1-like [Source:HGNC Symbol;Acc:HGNC:4862]
ENSOARG00000016138	4.57164	0.929129	123.642	31.6161	1.9674	0.0012021	0.038769	CD5	CD5 molecule [Source:HGNC Symbol;Acc:HGNC:1685]
ENSOARG00000016145	3.56493	9.32921	117.429	379.811	-1.6935	2.5424e-05	0.0021029	NPTXR	neuronal pentraxin receptor [Source:HGNC Symbol;Acc:HGNC:7954]
ENSOARG00000016193	10.4586	1.64885	141.987	26.0788	2.4448	2.4478e-07	5.432e-05	IL18	interleukin 18 [Source:HGNC Symbol;Acc:HGNC:5986]
ENSOARG00000016257	10.2683	1.91094	860.862	185.281	2.2161	0.0009537	0.032446	-	MHC class II DQA; Uncharacterized protein [Source:UniProtKB/TrEMBL;Acc:W1IAM8]
ENSOARG00000016271	8.11897	1.0203	99.1178	15.4314	2.6833	2.3756e-07	5.3206e-05	HOXC4	homeobox C4 [Source:HGNC Symbol;Acc:HGNC:5126]
ENSOARG00000016285	0.1438	0.81119	2.94528	20.6622	-2.8105	0.0016446	0.048046	GDF-8	Growth/differentiation factor 8 [Source:UniProtKB/Swiss-Prot;Acc:O18830]
ENSOARG00000016306	12.0133	3.57383	156.188	57.1083	1.4515	0.00072879	0.026629	HOXC8	homeobox C8 [Source:HGNC Symbol;Acc:HGNC:5129]
ENSOARG00000016334	7.52312	0.0427522	183.877	1.17092	7.295	7.4901e-26	1.8118e-21	WT1	Wilms tumor 1 [Source:HGNC Symbol;Acc:HGNC:12796]
ENSOARG00000016338	2.81317	0.369207	33.7105	4.87024	2.7911	0.00010044	0.0059693	HS3ST2	heparan sulfate (glucosamine) 3-O-sulfotransferase 2 [Source:HGNC Symbol;Acc:HGNC:5195]
ENSOARG00000016342	0.254678	2.15453	4.29828	44.5916	-3.3749	5.2583e-07	9.4217e-05	HOXC11	homeobox C11 [Source:HGNC Symbol;Acc:HGNC:5123]
ENSOARG00000016352	0	2.42499	0	43.2398	#NAME?	3.856e-09	2.061e-06	HOXC12	homeobox C12 [Source:HGNC Symbol;Acc:HGNC:5124]
ENSOARG00000016363	0.0342059	1.09751	0.517271	21.7057	-5.391	1.7198e-06	0.00025679	HOXC13	homeobox C13 [Source:HGNC Symbol;Acc:HGNC:5125]
ENSOARG00000016480	3.99728	0.857452	286.144	75.3953	1.9242	7.8175e-06	0.00080848	LVRN	laeverin [Source:HGNC Symbol;Acc:HGNC:26904]
ENSOARG00000016505	5.98535	2.02779	492.436	203.844	1.2725	0.0010577	0.035097	CPT1A	carnitine O-palmitoyltransferase 1, liver isoform [Source:RefSeq peptide;Acc:NP_001009414]
ENSOARG00000016510	8.63797	2.71887	1041.81	402.845	1.3708	0.00034109	0.015001	-	Uncharacterized protein [Source:UniProtKB/TrEMBL;Acc:W5Q4T7]
ENSOARG00000016548	3.83649	0.860767	142.868	36.1758	1.9816	0.00042893	0.01795	KCNK5	potassium channel, two pore domain subfamily K, member 5 [Source:HGNC Symbol;Acc:HGNC:6280]
ENSOARG00000016610	111.345	26.4113	2124.49	613.492	1.792	3.5386e-06	0.00042585	HLA-DRA	major histocompatibility complex, class II, DR alpha [Source:HGNC Symbol;Acc:HGNC:4947]
ENSOARG00000016622	8.85243	2.32727	348.517	114.594	1.6047	0.00010615	0.0062253	FZD6	frizzled class receptor 6 [Source:HGNC Symbol;Acc:HGNC:4044]
ENSOARG00000016636	8.12498	19.3911	271.329	794.923	-1.5508	6.8887e-05	0.0044914	FBXO24	F-box protein 24 [Source:HGNC Symbol;Acc:HGNC:13595]
ENSOARG00000016642	6.69804	1.83425	288.965	95.8948	1.5914	0.00011301	0.0065088	ITGB7	integrin, beta 7 [Source:HGNC Symbol;Acc:HGNC:6162]
ENSOARG00000016739	2.77544	0.617247	224.279	63.1614	1.8282	5.9941e-05	0.0040614	-	Uncharacterized protein [Source:UniProtKB/TrEMBL;Acc:W5Q5J3]
ENSOARG00000016754	2.43734	0.157922	35.6201	2.93211	3.6027	2.8224e-06	0.00035744	CD7	CD7 molecule [Source:HGNC Symbol;Acc:HGNC:1695]
ENSOARG00000016764	5.08062	97.2741	116.914	2574.03	-4.4605	3.3609e-07	6.8896e-05	FRZB	frizzled-related protein [Source:HGNC Symbol;Acc:HGNC:3959]
ENSOARG00000016766	1.68863	15.3512	37.0354	424.719	-3.5195	0.00019618	0.0099332	P2RX6	purinergic receptor P2X, ligand gated ion channel, 6 [Source:HGNC Symbol;Acc:HGNC:8538]
ENSOARG00000016771	145.391	389.234	3826.26	12334.8	-1.6887	1.079e-05	0.0010653	-	Uncharacterized protein [Source:UniProtKB/TrEMBL;Acc:W5Q5L8]
ENSOARG00000016790	8.59646	2.44533	961.391	322.26	1.5769	4.2627e-05	0.0031532	COL14A1	collagen, type XIV, alpha 1 [Source:HGNC Symbol;Acc:HGNC:2191]
ENSOARG00000016798	580.246	178.531	5403.57	2045.52	1.4014	0.00019854	0.010005	SAT1	spermidine/spermine N1-acetyltransferase 1 [Source:HGNC Symbol;Acc:HGNC:10540]
ENSOARG00000016857	12.7163	3.46234	394.915	129.545	1.6081	7.3447e-05	0.0047125	FNBP1L	formin binding protein 1-like [Source:HGNC Symbol;Acc:HGNC:20851]
ENSOARG00000016867	1.88781	0.286344	106.029	19.0982	2.473	1.9251e-06	0.00028052	ITGA4	integrin, alpha 4 (antigen CD49D, alpha 4 subunit of VLA-4 receptor) [Source:HGNC Symbol;Acc:HGNC:6140]
ENSOARG00000016870	0.536193	2.98518	17.0154	117.028	-2.7819	2.6897e-05	0.0021906	SLC7A4	solute carrier family 7, member 4 [Source:HGNC Symbol;Acc:HGNC:11062]
ENSOARG00000016888	3.68522	0.617793	344.439	69.0019	2.3195	8.4315e-07	0.00014262	IQGAP2	IQ motif containing GTPase activating protein 2 [Source:HGNC Symbol;Acc:HGNC:6111]
ENSOARG00000016922	3.94126	1.28124	473.057	189.415	1.3205	0.00082728	0.029171	CASP8	caspase 8, apoptosis-related cysteine peptidase [Source:HGNC Symbol;Acc:HGNC:1509]
ENSOARG00000016937	11.5102	2.85223	1197.23	362.459	1.7238	1.8718e-05	0.0016893	F2R	coagulation factor II (thrombin) receptor [Source:HGNC Symbol;Acc:HGNC:3537]
ENSOARG00000016951	2.45219	15.1126	60.0739	433.728	-2.852	0.0006707	0.024912	KRT13	keratin 13, type I [Source:HGNC Symbol;Acc:HGNC:6415]
ENSOARG00000017006	27.0013	6.03063	292.299	79.2559	1.8829	8.9262e-06	0.00090341	-	Uncharacterized protein [Source:UniProtKB/TrEMBL;Acc:W5Q6B6]
ENSOARG00000017020	4.03258	0.529575	95.0628	14.64	2.699	2.7114e-07	5.856e-05	-	Uncharacterized protein [Source:UniProtKB/TrEMBL;Acc:W5Q6C9]
ENSOARG00000017034	6.93357	1.9827	514.137	176.607	1.5416	9.9299e-05	0.0059161	STK17A	serine/threonine kinase 17a [Source:HGNC Symbol;Acc:HGNC:11395]
ENSOARG00000017037	4.30497	0.598563	43.8209	7.91042	2.4698	0.00010487	0.0061719	SHISA2	shisa family member 2 [Source:HGNC Symbol;Acc:HGNC:20366]
ENSOARG00000017049	0.185571	2.81525	5.49295	98.9111	-4.1705	3.1874e-13	5.14e-10	-	Uncharacterized protein [Source:UniProtKB/TrEMBL;Acc:W5Q6G0]
ENSOARG00000017076	6.20718	1.48885	86.7819	26.4925	1.7118	0.0004525	0.018638	PVRIG	poliovirus receptor related immunoglobulin domain containing [Source:HGNC Symbol;Acc:HGNC:32190]
ENSOARG00000017093	35.4168	11.7893	1119.02	454.701	1.2992	0.00062915	0.023966	SPRY1	sprouty RTK signaling antagonist 1 [Source:HGNC Symbol;Acc:HGNC:11269]
ENSOARG00000017108	1.91173	0.246763	39.085	5.7382	2.7679	4.5846e-05	0.0033302	GRAP2	GRB2-related adaptor protein 2 [Source:HGNC Symbol;Acc:HGNC:4563]
ENSOARG00000017168	1839.77	3873.7	236750	623658	-1.3974	0.00059981	0.023136	FASN	fatty acid synthase [Source:HGNC Symbol;Acc:HGNC:3594]
ENSOARG00000017199	3.87414	1.08417	263.913	91.2296	1.5325	0.00032276	0.014539	ADCY7	adenylate cyclase 7 [Source:HGNC Symbol;Acc:HGNC:238]
ENSOARG00000017205	22.6813	6.00106	667.322	216.481	1.6241	4.3161e-05	0.003179	TNFRSF1B	tumor necrosis factor receptor superfamily, member 1B [Source:HGNC Symbol;Acc:HGNC:11917]
ENSOARG00000017214	228.872	41.0525	7602.61	1704.84	2.1569	1.7517e-08	6.8997e-06	NR4A1	nuclear receptor subfamily 4, group A, member 1 [Source:HGNC Symbol;Acc:HGNC:7980]
ENSOARG00000017249	13.3337	3.6836	136.971	46.839	1.5481	0.0013386	0.042052	-	Uncharacterized protein [Source:UniProtKB/TrEMBL;Acc:W5Q721]
ENSOARG00000017265	8.65399	2.83232	177.668	69.7845	1.3482	0.0016635	0.048421	TMEM173	transmembrane protein 173 [Source:HGNC Symbol;Acc:HGNC:27962]
ENSOARG00000017344	4.48832	1.13208	129.17	41.3968	1.6417	0.00031449	0.014353	BIN2	bridging integrator 2 [Source:HGNC Symbol;Acc:HGNC:1053]
ENSOARG00000017362	2.04816	0.263645	35.2425	5.90911	2.5763	0.00020157	0.010074	SNX20	sorting nexin 20 [Source:HGNC Symbol;Acc:HGNC:30390]
ENSOARG00000017394	0.942246	3.95977	27.2448	141.407	-2.3758	0.00016982	0.0089299	NRG2	neuregulin 2 [Source:HGNC Symbol;Acc:HGNC:7998]
ENSOARG00000017420	1.99939	0.499942	130.342	38.7271	1.7509	0.0001383	0.0076903	GLI3	GLI family zinc finger 3 [Source:HGNC Symbol;Acc:HGNC:4319]
ENSOARG00000017465	2.55298	0.647982	159.796	49.5466	1.6894	0.00015336	0.0082805	AMOT	angiomotin [Source:HGNC Symbol;Acc:HGNC:17810]
ENSOARG00000017468	173.933	386.928	4373.86	12006.5	-1.4568	0.00012593	0.0071172	EPHX1	epoxide hydrolase 1, microsomal (xenobiotic) [Source:HGNC Symbol;Acc:HGNC:3401]
ENSOARG00000017474	39.7661	86.204	4390.58	11536.9	-1.3938	0.00022455	0.010991	JUP	junction plakoglobin [Source:HGNC Symbol;Acc:HGNC:6207]
ENSOARG00000017489	25.0244	143.16	954.251	6510.81	-2.7704	4.6739e-05	0.0033731	AACS	acetoacetyl-CoA synthetase [Source:HGNC Symbol;Acc:HGNC:21298]
ENSOARG00000017513	105.164	28.7155	2409.57	761.045	1.6627	0.0011858	0.038448	ISLR	immunoglobulin superfamily containing leucine-rich repeat [Source:HGNC Symbol;Acc:HGNC:6133]
ENSOARG00000017550	22.461	52.1391	227.678	644.489	-1.5012	9.7778e-05	0.0058689	-	Uncharacterized protein [Source:UniProtKB/TrEMBL;Acc:W5Q7Z1]
ENSOARG00000017560	17.9416	3.58179	646.016	158.197	2.0298	0.0016706	0.04857	FLRT2	fibronectin leucine rich transmembrane protein 2 [Source:HGNC Symbol;Acc:HGNC:3761]
ENSOARG00000017562	2.81168	0.52866	55.5603	12.5332	2.1483	0.00019936	0.010026	CXCR3	chemokine (C-X-C motif) receptor 3 [Source:HGNC Symbol;Acc:HGNC:4540]
ENSOARG00000017631	1.9793	0.225742	64.575	8.86418	2.8649	1.155e-06	0.00018751	PRKCB	protein kinase C, beta [Source:HGNC Symbol;Acc:HGNC:9395]
ENSOARG00000017707	31.5145	79.8569	335.472	1028.66	-1.6165	3.3466e-05	0.0025946	BRI3BP	BRI3 binding protein [Source:HGNC Symbol;Acc:HGNC:14251]
ENSOARG00000017739	4.41945	0.110249	171.814	5.31885	5.0136	1.3188e-13	2.4539e-10	CAPN6	calpain 6 [Source:HGNC Symbol;Acc:HGNC:1483]
ENSOARG00000017769	8.91031	34.6143	106.224	503.248	-2.2442	3.846e-08	1.2082e-05	CITED1	Cbp/p300-interacting transactivator, with Glu/Asp-rich carboxy-terminal domain, 1 [Source:HGNC Symbol;Acc:HGNC:1986]
ENSOARG00000017807	6.68506	1.40138	342.518	87.2897	1.9723	2.2867e-06	0.00031607	ERAP1	endoplasmic reticulum aminopeptidase 1 [Source:HGNC Symbol;Acc:HGNC:18173]
ENSOARG00000017826	4.34541	14.6181	100.615	416.497	-2.0495	4.0352e-07	7.6677e-05	CAMKK1	calcium/calmodulin-dependent protein kinase kinase 1, alpha [Source:HGNC Symbol;Acc:HGNC:1469]
ENSOARG00000017875	11.5945	2.00342	461.403	95.5495	2.2717	3.0419e-07	6.3815e-05	COL8A1	collagen, type VIII, alpha 1 [Source:HGNC Symbol;Acc:HGNC:2215]
ENSOARG00000017877	9.37953	0.972973	154.245	19.4194	2.9897	9.4255e-10	6.162e-07	-	Uncharacterized protein [Source:UniProtKB/TrEMBL;Acc:W5Q8Z2]
ENSOARG00000017892	1.847	0.354697	39.959	9.38064	2.0908	0.0011835	0.038425	P2RX1	purinergic receptor P2X, ligand gated ion channel, 1 [Source:HGNC Symbol;Acc:HGNC:8533]
ENSOARG00000017906	31.9527	80.6126	991.028	3050.3	-1.622	1.8367e-05	0.001664	PCYT2	phosphate cytidylyltransferase 2, ethanolamine [Source:HGNC Symbol;Acc:HGNC:8756]
ENSOARG00000017928	1.89227	0.0914036	34.4841	1.91152	4.1731	4.7143e-05	0.0033838	-	Uncharacterized protein [Source:UniProtKB/TrEMBL;Acc:W5Q947]
ENSOARG00000017964	65.6086	234.917	1634.72	7248.5	-2.1486	5.7583e-05	0.0039683	IRX3	iroquois homeobox 3 [Source:HGNC Symbol;Acc:HGNC:14360]
ENSOARG00000017970	3.33777	0.318872	63.0817	7.42423	3.0869	1.2977e-06	0.00020516	-	Uncharacterized protein [Source:UniProtKB/TrEMBL;Acc:W5Q999]
ENSOARG00000017973	34.1172	64.1592	575.221	1316.24	-1.1942	0.0014232	0.043461	AZGP1	alpha-2-glycoprotein 1, zinc-binding [Source:HGNC Symbol;Acc:HGNC:910]
ENSOARG00000017976	4.9189	1.56952	266.279	103.635	1.3614	0.00097833	0.033005	ATP2A3	ATPase, Ca++ transporting, ubiquitous [Source:HGNC Symbol;Acc:HGNC:813]
ENSOARG00000018039	9.71527	1.0777	210.388	26.0908	3.0114	9.968e-11	9.6446e-08	BMP7	bone morphogenetic protein 7 [Source:HGNC Symbol;Acc:HGNC:1074]
ENSOARG00000018057	5.9978	1.85658	207.438	78.2143	1.4072	0.0010939	0.03595	RLIM	ring finger protein, LIM domain interacting [Source:HGNC Symbol;Acc:HGNC:13429]
ENSOARG00000018110	13.3115	28.8424	348.814	941.224	-1.4321	0.00021451	0.01059	DBT	dihydrolipoamide branched chain transacylase E2 [Source:HGNC Symbol;Acc:HGNC:2698]
ENSOARG00000018189	1.04572	0.0960309	68.6754	7.17815	3.2581	0.00088695	0.030693	FAIM2	Fas apoptotic inhibitory molecule 2 [Source:HGNC Symbol;Acc:HGNC:17067]
ENSOARG00000018210	422.028	103.057	21762.6	6504.69	1.7423	4.2422e-06	0.00049572	TIMP3	TIMP metallopeptidase inhibitor 3 [Source:HGNC Symbol;Acc:HGNC:11822]
ENSOARG00000018226	3.47577	0.96477	214.84	72.9353	1.5586	0.00031914	0.014456	RAPH1	Ras association (RalGDS/AF-6) and pleckstrin homology domains 1 [Source:HGNC Symbol;Acc:HGNC:14436]
ENSOARG00000018227	1.25187	0.302017	57.3731	16.0922	1.834	0.00082317	0.029068	WSCD2	WSC domain containing 2 [Source:HGNC Symbol;Acc:HGNC:29117]
ENSOARG00000018232	1332.35	2394.7	40792.7	91424.8	-1.1643	0.0016035	0.047359	-	Carboxylic ester hydrolase [Source:UniProtKB/TrEMBL;Acc:W5QA37]
ENSOARG00000018260	6.02116	1.47133	148.711	43.9152	1.7597	9.1339e-05	0.0055373	ST8SIA4	ST8 alpha-N-acetyl-neuraminide alpha-2,8-sialyltransferase 4 [Source:HGNC Symbol;Acc:HGNC:10871]
ENSOARG00000018337	0.825622	0.0613119	73.3339	5.76481	3.6691	1.9873e-06	0.00028444	CPAMD8	C3 and PZP-like, alpha-2-macroglobulin domain containing 8 [Source:HGNC Symbol;Acc:HGNC:23228]
ENSOARG00000018445	19.0709	6.5013	832.691	329.772	1.3363	0.00061562	0.023599	F13A1	coagulation factor XIII, A1 polypeptide [Source:HGNC Symbol;Acc:HGNC:3531]
ENSOARG00000018487	32.6767	7.35265	665.344	185.662	1.8414	2.8375e-06	0.00035748	CTSW	cathepsin W [Source:HGNC Symbol;Acc:HGNC:2546]
ENSOARG00000018510	4.67541	0.971878	88.5541	21.7054	2.0285	5.8022e-05	0.0039872	SNCA	synuclein, alpha (non A4 component of amyloid precursor) [Source:HGNC Symbol;Acc:HGNC:11138]
ENSOARG00000018528	67.6494	12.9464	2551.5	582.716	2.1305	0.00048524	0.019498	TGM2	transglutaminase 2 [Source:HGNC Symbol;Acc:HGNC:11778]
ENSOARG00000018548	9.85199	25.698	271.753	846.431	-1.6391	2.5473e-05	0.0021029	SHMT1	serine hydroxymethyltransferase 1 (soluble) [Source:HGNC Symbol;Acc:HGNC:10850]
ENSOARG00000018615	3.61578	1.02927	308.068	104.708	1.5569	0.00014398	0.0079039	SAMD9	sterile alpha motif domain containing 9 [Source:HGNC Symbol;Acc:HGNC:1348]
ENSOARG00000018650	0.700428	5.3947	6.22839	59.5335	-3.2568	9.619e-08	2.5568e-05	NRN1	neuritin 1 [Source:HGNC Symbol;Acc:HGNC:17972]
ENSOARG00000018733	5.37992	13.0514	152.053	457.924	-1.5905	8.1015e-05	0.0050248	-	Alpha-amylase [Source:UniProtKB/TrEMBL;Acc:W5QBM0]
ENSOARG00000018775	6.38444	1.01139	341.565	66.7662	2.355	3.1335e-08	1.0566e-05	CBLB	Cbl proto-oncogene B, E3 ubiquitin protein ligase [Source:HGNC Symbol;Acc:HGNC:1542]
ENSOARG00000018838	10.0189	2.92363	124.476	43.5514	1.5151	0.0010594	0.035103	KLF7	Kruppel-like factor 7 (ubiquitous) [Source:HGNC Symbol;Acc:HGNC:6350]
ENSOARG00000018862	6.61397	1.49173	113.372	31.3669	1.8537	0.00014307	0.0079039	FAM102B	family with sequence similarity 102, member B [Source:HGNC Symbol;Acc:HGNC:27637]
ENSOARG00000018923	11.4465	1.55458	508.807	85.142	2.5792	6.6949e-10	4.4984e-07	PAMR1	peptidase domain containing associated with muscle regeneration 1 [Source:HGNC Symbol;Acc:HGNC:24554]
ENSOARG00000018943	3.95931	0.919747	126.625	35.5964	1.8308	8.6996e-05	0.005341	CYBB	cytochrome b-245, beta polypeptide [Source:HGNC Symbol;Acc:HGNC:2578]
ENSOARG00000018980	72.3409	147.306	7166.02	17844.7	-1.3162	0.00044052	0.018277	IDH1	isocitrate dehydrogenase 1 (NADP+), soluble [Source:HGNC Symbol;Acc:HGNC:5382]
ENSOARG00000019031	2.50343	8.06234	46.8049	186.331	-1.9931	6.9272e-06	0.00074805	A4GALT	alpha 1,4-galactosyltransferase [Source:HGNC Symbol;Acc:HGNC:18149]
ENSOARG00000019036	5.41253	11.747	117.23	315.169	-1.4268	0.00046201	0.018847	C15orf59	chromosome 15 open reading frame 59 [Source:HGNC Symbol;Acc:HGNC:33753]
ENSOARG00000019067	5.57443	1.35564	127.6	34.6227	1.8818	0.00052843	0.020886	WNT2	wingless-type MMTV integration site family member 2 [Source:HGNC Symbol;Acc:HGNC:12780]
ENSOARG00000019142	1.67848	0.289782	58.9442	12.6679	2.2182	0.00010087	0.00598	SHCBP1L	SHC SH2-domain binding protein 1-like [Source:HGNC Symbol;Acc:HGNC:16788]
ENSOARG00000019145	162.846	301.995	2620.93	5968.27	-1.1872	0.0015035	0.045178	TST	thiosulfate sulfurtransferase (rhodanese) [Source:HGNC Symbol;Acc:HGNC:12388]
ENSOARG00000019168	11.7546	0.746054	137.732	11.4415	3.5895	4.2895e-08	1.3134e-05	TCF23	transcription factor 23 [Source:HGNC Symbol;Acc:HGNC:18602]
ENSOARG00000019179	2.8835	0.381657	89.8099	14.1056	2.6706	4.121e-07	7.7274e-05	CD96	CD96 molecule [Source:HGNC Symbol;Acc:HGNC:16892]
ENSOARG00000019197	9.72784	1.52738	292.632	57.0117	2.3598	6.8638e-08	1.9084e-05	IL2RB	interleukin 2 receptor, beta [Source:HGNC Symbol;Acc:HGNC:6009]
ENSOARG00000019218	3.32735	0.953073	305.243	107.508	1.5055	0.00026572	0.012408	CYTH4	cytohesin 4 [Source:HGNC Symbol;Acc:HGNC:9505]
ENSOARG00000019235	320.359	950.53	3220.27	11627.6	-1.8523	6.8895e-07	0.00011989	MID1IP1	MID1 interacting protein 1 [Source:HGNC Symbol;Acc:HGNC:20715]
ENSOARG00000019246	29.4027	54.5515	696.584	1572.65	-1.1748	0.0013736	0.042597	PNPLA3	patatin-like phospholipase domain containing 3 [Source:HGNC Symbol;Acc:HGNC:18590]
ENSOARG00000019286	6.04166	1.27583	109.073	28.3394	1.9444	5.9212e-05	0.0040346	PARVG	parvin, gamma [Source:HGNC Symbol;Acc:HGNC:14654]
ENSOARG00000019324	7.94858	2.60792	493.685	196.995	1.3254	0.00084544	0.029724	INPP5D	inositol polyphosphate-5-phosphatase, 145kDa [Source:HGNC Symbol;Acc:HGNC:6079]
ENSOARG00000019347	0.897844	0.0967773	28.7145	3.47152	3.0481	0.00078176	0.028015	NGEF	neuronal guanine nucleotide exchange factor [Source:HGNC Symbol;Acc:HGNC:7807]
ENSOARG00000019395	0.836405	7.15422	13.6514	133.915	-3.2942	0.00043918	0.018253	ALX3	ALX homeobox 3 [Source:HGNC Symbol;Acc:HGNC:449]
ENSOARG00000019413	2.03355	5.27595	36.2408	113.082	-1.6417	0.00026369	0.012337	FAM84A	family with sequence similarity 84, member A [Source:HGNC Symbol;Acc:HGNC:20743]
ENSOARG00000019445	8.40451	1.25518	404.691	75.5839	2.4207	2.4832e-08	8.8721e-06	TRAC	T cell receptor alpha constant [Source:HGNC Symbol;Acc:HGNC:12029]
ENSOARG00000019448	22.8518	1.83641	218.641	21.726	3.3311	6.4206e-05	0.0042784	TRDC	T cell receptor delta constant [Source:HGNC Symbol;Acc:HGNC:12253]
ENSOARG00000019463	2.86424	0.63896	309.317	82.3952	1.9085	9.2616e-06	0.00093345	CD53	CD53 molecule [Source:RefSeq peptide;Acc:NP_001269176]
ENSOARG00000019503	2.11812	0.404348	128.771	28.3721	2.1823	3.5268e-06	0.00042585	CAPRIN2	caprin family member 2 [Source:HGNC Symbol;Acc:HGNC:21259]
ENSOARG00000019564	10.0866	1.89131	520.806	123.561	2.0755	0.00041628	0.017512	TMTC1	transmembrane and tetratricopeptide repeat containing 1 [Source:HGNC Symbol;Acc:HGNC:24099]
ENSOARG00000019663	9.36229	0.70319	88.7924	7.56724	3.5526	5.0252e-10	3.8026e-07	PTHLH	parathyroid hormone-like hormone [Source:HGNC Symbol;Acc:HGNC:9607]
ENSOARG00000019670	11.217	3.45047	391.159	147.473	1.4073	0.00053588	0.021112	CTTNBP2NL	CTTNBP2 N-terminal like [Source:HGNC Symbol;Acc:HGNC:25330]
ENSOARG00000019707	15.8304	5.04176	1246.55	479.516	1.3783	0.00036974	0.016085	ARHGAP31	Rho GTPase activating protein 31 [Source:HGNC Symbol;Acc:HGNC:29216]
ENSOARG00000019754	10.0045	0.584648	194.09	13.6413	3.8307	2.073e-14	5.5716e-11	GPR1	G protein-coupled receptor 1 [Source:HGNC Symbol;Acc:HGNC:4463]
ENSOARG00000019817	0.0723852	0.68396	2.12891	24.5687	-3.5286	0.00039207	0.016845	NR1I2	nuclear receptor subfamily 1, group I, member 2 [Source:HGNC Symbol;Acc:HGNC:7968]
ENSOARG00000019840	2.41777	0.334795	44.8348	7.18181	2.6422	3.5304e-05	0.0026992	PTAFR	platelet-activating factor receptor [Source:HGNC Symbol;Acc:HGNC:9582]
ENSOARG00000019876	9.44953	2.97236	327.487	123.685	1.4048	0.00039646	0.017004	ARHGAP25	Rho GTPase activating protein 25 [Source:HGNC Symbol;Acc:HGNC:28951]
ENSOARG00000019963	63.8871	17.6121	1328.57	445.985	1.5748	5.0432e-05	0.0035566	GJA1	gap junction protein, alpha 1, 43kDa [Source:HGNC Symbol;Acc:HGNC:4274]
ENSOARG00000019971	52.5119	11.8293	147.258	41.6758	1.8211	0.00065654	0.024546	PLN	phospholamban [Source:HGNC Symbol;Acc:HGNC:9080]
ENSOARG00000020030	5.97074	1.63817	143.499	47.5879	1.5924	0.00039789	0.017034	SPRED1	sprouty-related, EVH1 domain containing 1 [Source:HGNC Symbol;Acc:HGNC:20249]
ENSOARG00000020050	10.5382	3.26332	277.745	101.439	1.4531	0.00037953	0.016453	HCLS1	hematopoietic cell-specific Lyn substrate 1 [Source:HGNC Symbol;Acc:HGNC:4844]
ENSOARG00000020112	2.05423	0.326571	48.0387	9.09197	2.4015	0.00011484	0.0065983	CD86	CD86 molecule [Source:HGNC Symbol;Acc:HGNC:1705]
ENSOARG00000020138	8.42209	1.36774	177.049	35.0418	2.337	4.1828e-05	0.0031131	NGF	nerve growth factor (beta polypeptide) [Source:HGNC Symbol;Acc:HGNC:7808]
ENSOARG00000020160	2.46171	0.737177	339.516	123.786	1.4556	0.00034826	0.015233	PARP14	poly (ADP-ribose) polymerase family, member 14 [Source:HGNC Symbol;Acc:HGNC:29232]
ENSOARG00000020186	8.02465	22.8695	467.158	1602.3	-1.7782	3.1955e-06	0.00039211	ADCY5	adenylate cyclase 5 [Source:HGNC Symbol;Acc:HGNC:236]
ENSOARG00000020204	69.1103	157.49	1528.62	4291.07	-1.4891	0.00020126	0.010074	CMAS	cytidine monophosphate N-acetylneuraminic acid synthetase [Source:HGNC Symbol;Acc:HGNC:18290]
ENSOARG00000020214	3.99358	1.32436	627.77	256.733	1.29	0.00080797	0.028741	KALRN	kalirin, RhoGEF kinase [Source:HGNC Symbol;Acc:HGNC:4814]
ENSOARG00000020215	3.40987	0.733172	52.8555	13.6702	1.951	0.00077911	0.027961	-	Uncharacterized protein [Source:UniProtKB/TrEMBL;Acc:W5QG57]
ENSOARG00000020233	25.2956	7.28413	1214.68	423.033	1.5217	0.00012146	0.0068993	HEG1	heart development protein with EGF-like domains 1 [Source:HGNC Symbol;Acc:HGNC:29227]
ENSOARG00000020249	2.9709	0.447241	171.379	32.3494	2.4054	1.667e-07	4.0731e-05	CD2	CD2 molecule [Source:HGNC Symbol;Acc:HGNC:1639]
ENSOARG00000020287	3.80942	14.5348	107.825	523.213	-2.2787	5.937e-08	1.7096e-05	MUC20	mucin 20, cell surface associated [Source:HGNC Symbol;Acc:HGNC:23282]
ENSOARG00000020351	8.66868	2.52722	323.589	118.752	1.4462	0.00035761	0.015586	NRROS	negative regulator of reactive oxygen species [Source:HGNC Symbol;Acc:HGNC:24613]
ENSOARG00000020376	0.19082	18.6034	6.3486	708.837	-6.8029	3.7063e-17	2.9884e-13	TBX15	T-box 15 [Source:HGNC Symbol;Acc:HGNC:11594]
ENSOARG00000020383	3.17397	42.9591	134.592	2150.89	-3.9983	0.00058313	0.0226	BDH1	3-hydroxybutyrate dehydrogenase, type 1 [Source:HGNC Symbol;Acc:HGNC:1027]
ENSOARG00000020437	1.56227	0.369168	186.801	52.6331	1.8275	2.4839e-05	0.0020718	DOCK10	dedicator of cytokinesis 10 [Source:HGNC Symbol;Acc:HGNC:23479]
ENSOARG00000020475	6.10357	1.17897	303.7	72.4764	2.0671	1.2757e-06	0.00020301	P3H2	prolyl 3-hydroxylase 2 [Source:HGNC Symbol;Acc:HGNC:19317]
ENSOARG00000020519	6.80762	14.8966	194.542	529.528	-1.4446	0.00025577	0.012107	KNG1	kininogen 1 [Source:HGNC Symbol;Acc:HGNC:6383]
ENSOARG00000020622	24.9097	6.03145	1228.82	359.037	1.7751	4.8154e-06	0.00055204	EPS8	epidermal growth factor receptor pathway substrate 8 [Source:HGNC Symbol;Acc:HGNC:3420]
ENSOARG00000020657	1.62431	0.224013	38.7461	6.76977	2.5169	0.00015799	0.008467	LAMP3	lysosomal-associated membrane protein 3 [Source:HGNC Symbol;Acc:HGNC:14582]
ENSOARG00000020665	6.28645	12.9362	806.332	2031.7	-1.3332	0.00038176	0.01652	ATP11B	ATPase, class VI, type 11B [Source:HGNC Symbol;Acc:HGNC:13553]
ENSOARG00000020667	1.01154	0.200297	84.6546	20.6302	2.0368	8.0939e-05	0.0050248	-	high affinity immunoglobulin gamma Fc receptor I precursor [Source:RefSeq peptide;Acc:NP_001132924]
ENSOARG00000020676	8.75435	1.48998	102.424	20.6668	2.3092	2.8076e-06	0.00035744	RERG	RAS-like, estrogen-regulated, growth inhibitor [Source:HGNC Symbol;Acc:HGNC:15980]
ENSOARG00000020677	0.928633	4.02826	5.75098	29.4948	-2.3586	0.00095011	0.032415	C2orf72	chromosome 2 open reading frame 72 [Source:HGNC Symbol;Acc:HGNC:27418]
ENSOARG00000020734	6.00879	1.27208	79.2798	19.9262	1.9923	0.0013247	0.041668	CD8A	CD8a molecule [Source:HGNC Symbol;Acc:HGNC:1706]
ENSOARG00000020741	16.0877	4.23061	257.27	85.3705	1.5915	0.00014959	0.0081132	TNFSF10	tumor necrosis factor (ligand) superfamily, member 10 [Source:HGNC Symbol;Acc:HGNC:11925]
ENSOARG00000020747	5.42483	0.912091	59.5184	12.474	2.2544	5.4892e-05	0.0038045	CD8B	CD8b molecule [Source:HGNC Symbol;Acc:HGNC:1707]
ENSOARG00000020761	2.62235	0.350119	189.807	31.3417	2.5984	2.0529e-08	7.759e-06	TNIK	TRAF2 and NCK interacting kinase [Source:HGNC Symbol;Acc:HGNC:30765]
ENSOARG00000020763	2.4212	5.34473	149.012	408.341	-1.4543	0.00037715	0.016379	GUCY2C	guanylate cyclase 2C [Source:HGNC Symbol;Acc:HGNC:4688]
ENSOARG00000020818	2.57749	0.516573	149.686	36.2422	2.0462	9.3633e-06	0.00093979	PSD4	pleckstrin and Sec7 domain containing 4 [Source:HGNC Symbol;Acc:HGNC:19096]
ENSOARG00000020861	18.0827	4.39815	1571.65	468.402	1.7465	5.9502e-06	0.00066944	CTSS	cathepsin S [Source:HGNC Symbol;Acc:HGNC:2545]
ENSOARG00000020885	1.9646	0.530375	154.044	49.9101	1.6259	0.00027192	0.012667	RFX7	regulatory factor X, 7 [Source:HGNC Symbol;Acc:HGNC:25777]
ENSOARG00000020889	6.06768	1.74835	291.897	102.459	1.5104	0.00029809	0.013787	NEDD4	neural precursor cell expressed, developmentally down-regulated 4, E3 ubiquitin protein ligase [Source:HGNC Symbol;Acc:HGNC:7727]
ENSOARG00000020959	17.4081	5.71694	635.699	251.788	1.3361	0.00075409	0.027306	TMOD3	tropomodulin 3 (ubiquitous) [Source:HGNC Symbol;Acc:HGNC:11873]
ENSOARG00000020964	1.6853	0.116565	21.6116	1.87759	3.5248	0.00015372	0.0082814	-	Uncharacterized protein [Source:UniProtKB/TrEMBL;Acc:W5QIH7]
ENSOARG00000020966	1.45054	0.207053	40.6574	6.35142	2.6784	6.6296e-05	0.0043577	SCG3	secretogranin III [Source:HGNC Symbol;Acc:HGNC:13707]
ENSOARG00000020968	6.83508	1.65591	202.781	60.8015	1.7377	5.8279e-05	0.0039935	LCK	LCK proto-oncogene, Src family tyrosine kinase [Source:HGNC Symbol;Acc:HGNC:6524]
ENSOARG00000021000	3.59313	0.684592	39.0017	8.82795	2.1434	0.00054356	0.021344	-	Uncharacterized protein [Source:UniProtKB/TrEMBL;Acc:W5QIL5]
ENSOARG00000021001	8.6408	28.9177	214.423	860.912	-2.0054	3.3087e-07	6.8404e-05	FGF7	fibroblast growth factor 7 [Source:HGNC Symbol;Acc:HGNC:3685]
ENSOARG00000021002	3.81925	0.509304	38.3085	6.13826	2.6418	8.5633e-05	0.0052905	-	Uncharacterized protein [Source:UniProtKB/TrEMBL;Acc:W5QIL8]
ENSOARG00000021005	3.37565	0.610516	46.9244	10.0438	2.224	0.00019607	0.0099332	-	Uncharacterized protein [Source:UniProtKB/TrEMBL;Acc:W5QIM1]
ENSOARG00000021018	91.9269	20.4414	17158.4	4535.57	1.9196	5.7382e-07	0.00010131	FBN1	fibrillin 1 [Source:HGNC Symbol;Acc:HGNC:3603]
ENSOARG00000021056	0.227665	1.56668	7.06469	58.4571	-3.0487	2.954e-07	6.3234e-05	-//-
ENSOARG00000021060	1.79286	6.73102	54.2098	240.171	-2.1474	4.6571e-07	8.5341e-05	RORC	RAR-related orphan receptor C [Source:HGNC Symbol;Acc:HGNC:10260]
ENSOARG00000021090	0.940807	0.198298	74.1649	19.2205	1.9481	0.00019594	0.0099332	-	Uncharacterized protein [Source:UniProtKB/TrEMBL;Acc:W5QIW3]
ENSOARG00000021097	5.17311	1.42105	99.3032	33.6945	1.5593	0.0013682	0.042593	PELI2	pellino E3 ubiquitin protein ligase family member 2 [Source:HGNC Symbol;Acc:HGNC:8828]
ENSOARG00000021147	5.83102	1.97194	2156.77	884.138	1.2865	0.00062862	0.023966	SYNE2	spectrin repeat containing, nuclear envelope 2 [Source:HGNC Symbol;Acc:HGNC:17084]
ENSOARG00000021177	155.924	37.175	2477.83	721.136	1.7807	3.2097e-06	0.00039211	ZFP36L1	ZFP36 ring finger protein-like 1 [Source:HGNC Symbol;Acc:HGNC:1107]
ENSOARG00000021214	0.961258	11.2152	1.65151	24.2291	-3.8749	1.4939e-05	0.0013898	HOTAIR_3	HOTAIR conserved region 3 [Source:RFAM;Acc:RF01906]
ENSOARG00000021254	0.956683	20.9161	1.19405	30.4508	-4.6725	1.1233e-07	2.9217e-05	HOTAIR_2	HOTAIR conserved region 2 [Source:RFAM;Acc:RF01905]
ENSOARG00000022530	0.350316	6.07064	0.517271	11.1322	-4.4277	0.0015244	0.045603	oar-let-7d	oar-let-7d [Source:miRBase;Acc:MI0025244]
ENSOARG00000022822	10.5794	0.245999	16.3375	0.389088	5.3919	0.0013421	0.042107	SNORD14	Small nucleolar RNA SNORD14 [Source:RFAM;Acc:RF00016]
ENSOARG00000023214	0	1.89824	0	7.98193	#NAME?	0.0012957	0.041104	HOXA11-AS1_2	HOXA11 antisense RNA 1 conserved region 2 [Source:RFAM;Acc:RF02138]
ENSOARG00000023772	12.9422	0.489855	14.8261	0.744251	4.3162	0.00043838	0.018251	SNORD75	Small nucleolar RNA SNORD75 [Source:RFAM;Acc:RF00612]
ENSOARG00000023986	47.8481	4.99595	90.7846	11.0823	3.0342	3.3013e-08	1.0884e-05	MEG3_2	Maternally expressed 3 conserved region 2 [Source:RFAM;Acc:RF01872]
ENSOARG00000024209	138.742	14.3346	174.581	22.7213	2.9418	6.6314e-10	4.4984e-07	H19_1	H19 conserved region 1 [Source:RFAM;Acc:RF01972]
ENSOARG00000024490	19.3833	2.21485	74.6239	10.2376	2.8658	0.00073146	0.026687	U3	Small nucleolar RNA U3 [Source:RFAM;Acc:RF00012]
ENSOARG00000025180	63.7457	16.238	1293.41	400.655	1.6907	0.0014583	0.044257	CD14	monocyte differentiation antigen CD14 precursor [Source:RefSeq peptide;Acc:NP_001070677]
ENSOARG00000025182	17.9353	5.18059	152.794	54.5396	1.4862	0.00088696	0.030693	-	Uncharacterized protein [Source:UniProtKB/TrEMBL;Acc:W5QJA4]
ENSOARG00000025194	5.19034	1.22723	52.615	15.2086	1.7906	0.0012783	0.040739	ARL4C	ADP-ribosylation factor-like protein 4C [Source:RefSeq peptide;Acc:NP_001156026]
ENSOARG00000025464	2.41884	0.294555	60.9114	8.90176	2.7745	0.00012943	0.0072642	-//-
ENSOARG00000025707	13.5738	28.9708	447.628	1158.17	-1.3715	0.00049	0.019591	-//-
ENSOARG00000025715	0.140796	0.824429	4.49708	33.8502	-2.9121	0.00028249	0.013116	-//-
ENSOARG00000025779	21.468	4.53444	442.818	116.21	1.93	0.0014437	0.043925	-//-
ENSOARG00000025903	15.9075	33.8107	172.331	439.92	-1.3521	0.0006727	0.024919	-//-
ENSOARG00000026090	2.60675	0.442093	62.2678	12.6656	2.2976	3.7244e-05	0.0028153	-//-
ENSOARG00000026131	71.4977	6.73708	682.211	80.0633	3.091	1.5251e-13	2.635e-10	-//-
ENSOARG00000026132	0.816173	2.94189	48.3953	213.168	-2.139	9.7658e-07	0.00016405	-//-
ENSOARG00000026213	10.9784	22.3698	104.396	262.824	-1.332	0.0009776	0.033005	-//-
ENSOARG00000026371	9.71257	2.76167	154.122	52.8018	1.5454	0.00034184	0.015007	-//-
ENSOARG00000026502	1.49975	3.71719	34.4249	103.886	-1.5935	0.0010214	0.034032	-//-
ENSOARG00000026747	33.8906	9.60692	638.409	224.518	1.5077	0.0013579	0.042493	-//-
ENSOARG00000026988	0.0260152	1.98832	1.71134	147.586	-6.4303	0.00014411	0.0079039	-//-
Novel00003	1.83237	9.29663	88.2593	570.418	-2.6922	0.0011286	0.03694	-//-
Novel00033	1.05879	7.88603	54.0274	482.086	-3.1575	3.9169e-11	4.5117e-08	-//-
Novel00044	1.22677	0.154764	22.1283	3.35878	2.7199	0.0011381	0.037142	-//-
Novel00090	3.26599	6.58902	86.4886	214.758	-1.3121	0.0013658	0.042593	-//-
Novel00114	1.02294	19.4988	8.63707	207.397	-4.5857	1.4458e-05	0.0013558	-//-
Novel00116	504.114	96.3469	4788.25	1150.16	2.0577	6.6079e-06	0.00072	-//-
Novel00118	34.3259	6.11169	536.516	114.027	2.2342	4.2107e-07	7.8348e-05	-//-
Novel00187	0.0181557	1.12574	0.835729	68.8575	-6.3644	5.5304e-05	0.0038222	-//-
Novel00191	19.7768	38.7743	1380.12	3319.26	-1.2661	0.00063935	0.024196	-//-
Novel00214	0.240203	4.25828	1.83098	38.907	-4.4093	1.4175e-08	5.9116e-06	-//-
Novel00337	1.92865	0.262672	84.7792	14.5977	2.538	0.0009837	0.033094	-//-
Novel00341	3.83077	0.981077	488.009	157.989	1.6271	3.5485e-05	0.0026992	-//-
Novel00365	8.01617	1.58478	61.0491	13.7697	2.1485	0.00085891	0.02998	-//-
Novel00399	2.34785	0.57007	133.013	37.2	1.8382	6.0641e-05	0.0040859	-//-
Novel00450	0.730991	2.58082	8.41768	34.3454	-2.0286	0.0016588	0.048343	-//-
Novel00461	21.6945	5.04466	205.505	59.3666	1.7915	3.0084e-05	0.0023937	-//-
Novel00471	0.955571	3.06986	13.5716	51.943	-1.9363	0.00058858	0.022743	-//-
Novel00605	0.121311	1.10553	3.44322	37.2269	-3.4345	1.0526e-06	0.00017204	-//-
Novel00684	0.302416	1.59579	31.9394	198.483	-2.6356	6.3767e-09	3.0244e-06	-//-
Novel00685	0.621004	9.63012	27.3632	508.496	-4.2159	1.349e-20	1.6316e-16	-//-
Novel00755	1.62245	3.70304	54.1885	152.442	-1.4922	0.00055543	0.02174	-//-
Novel00766	0.637177	19.8009	18.0717	666.934	-5.2057	9.248e-05	0.0055925	-//-
Novel00784	23.6154	59.8774	1158.35	3629.25	-1.6476	1.4314e-05	0.0013525	-//-
Novel00805	13.218	3.94826	433.289	164.344	1.3986	0.00052746	0.020882	-//-
Novel00812	6.0456	0.447721	63.442	5.58422	3.506	2.5308e-08	8.8721e-06	-//-
Novel00829	0.202448	20.5687	3.70125	433.583	-6.8722	3.9207e-09	2.061e-06	-//-
Novel00830	0	1.7177	0	8.09102	#NAME?	0.0012536	0.040059	-//-
Novel00840	1.89896	0.0529804	29.3313	1.05452	4.7978	4.941e-07	8.9864e-05	-//-
Novel00880	54.8096	100.842	4975.5	11220.5	-1.1732	0.0015504	0.046185	-//-
Novel00905	0.160817	1.15421	4.61733	40.5165	-3.1334	4.9433e-05	0.0035169	-//-
Novel00917	18.0972	6.58393	4977.57	2217.43	1.1666	0.0014237	0.043461	-//-
Novel00956	3.62456	8.68024	49.0311	145.046	-1.5647	0.00057793	0.022475	-//-
Novel00975	0.61008	1.25759	73.4112	185.73	-1.3391	0.001493	0.044919	-//-
Novel00990	1.63331	0.381393	60.4949	17.4703	1.7919	0.00097437	0.033005	-//-
Novel01058	5.54311	0.830111	35.3639	6.32847	2.4823	0.00034003	0.014982	-//-
Novel01059	0.85364	0.183021	88.7148	24.4645	1.8585	0.0001927	0.0098544	-//-
Novel01101	0.0518401	1.84063	3.58221	157.359	-5.4571	3.6306e-07	7.2579e-05	-//-
Novel01142	0.155173	0.992234	5.90992	44.4969	-2.9125	1.7805e-05	0.0016191	-//-
Novel01168	1.76212	0.517654	101.452	35.7627	1.5043	0.0013902	0.042891	-//-
Novel01182	0	2.08519	0	180.649	#NAME?	4.9973e-09	2.5183e-06	-//-
Novel01321	1.75095	0.145457	26.6073	2.33819	3.5084	0.00018177	0.0094149	-//-
Novel01322	14.3906	0.0643832	1033.33	5.95035	7.4401	2.6169e-12	3.9562e-09	-//-
Novel01327	0.881355	0.171298	111.059	25.4908	2.1233	4.1197e-05	0.0030756	-//-
Novel01362	1.95609	0.216827	653.241	90.1935	2.8565	6.0971e-12	8.6754e-09	-//-
Novel01364	0.083671	1.47799	1.81104	40.142	-4.4702	4.7973e-05	0.003423	-//-
Novel01381	0.733775	4.63856	22.3096	171.588	-2.9432	2.0641e-10	1.7217e-07	-//-
Novel01513	0.465966	1.49414	29.5338	112.526	-1.9298	0.0010557	0.035076	-//-
Novel01686	0.48439	4.38038	24.1769	265.621	-3.4577	8.7091e-14	1.7555e-10	-//-
Novel01719	2.43469	6.72823	35.3826	119.17	-1.7519	0.00014828	0.0080601	-//-
Novel01741	0.773827	2.89272	38.9836	174.399	-2.1615	2.4406e-06	0.00033001	-//-
Novel01784	1.98091	0.570592	259.403	92.0486	1.4947	0.00030262	0.013943	-//-
Novel01831	10.5465	1.86624	386.396	84.7074	2.1895	1.1914e-07	3.0659e-05	--	Cdc42p [Rhizophagus irregularis DAOM 197198w]
Novel01864	0.748708	2.79522	27.5813	125.957	-2.1912	2.7261e-06	0.00035453	-//-
Novel01869	110.668	240.229	6271.42	16833.4	-1.4245	0.00052218	0.020741	-//-
Novel01871	0.0172367	1.4379	0.636917	62.0484	-6.6061	3.9476e-06	0.0004658	--	FAER314Wp [Ashbya gossypii FDAG1]
Novel01876	1.18144	0.110335	15.1234	1.56001	3.2772	0.0016338	0.047962	-//-
Novel01879	0.884714	3.27098	15.4243	66.3143	-2.1041	4.9848e-05	0.003536	-//-
Novel01889	2.08307	0.266166	89.2932	13.4727	2.7285	3.5816e-07	7.2579e-05	--	hypothetical protein GLOINDRAFT_338796 [Rhizophagus irregularis DAOM 181602]>gi|595443885|gb|EXX55266.1| hypothetical protein RirG_226910 [Rhizophagus irregularis DAOM 197198w]
Novel01912	0.315586	0.796861	26.5667	78.3963	-1.5612	0.0014699	0.044473	-//-
Novel01920	0.963809	0.209442	135.601	36.309	1.901	0.00026149	0.012282	-//-
Novel01927	2.91314	0.803516	113.344	36.2583	1.6443	0.00040352	0.017154	-//-
Novel01974	23.2692	48.0577	1164.51	2915.81	-1.3242	0.00047086	0.019149	-//-
Novel02009	3.08537	8.47187	31.9605	109.269	-1.7735	0.00030822	0.014147	-//-
Novel02018	36.4094	81.7078	3478.42	9455.36	-1.4427	0.00066313	0.024754	-//-
Novel02021	18.3477	47.2509	582.609	1857.57	-1.6728	0.00045603	0.018716	-//-
Novel02027	0.94684	0.153274	100.709	19.9285	2.3373	2.5953e-06	0.00034493	-//-
Novel02078	0.0667298	1.52542	2.80569	74.2563	-4.7261	0.00031553	0.014373	-//-
Novel02144	0.0311621	0.395722	2.18932	34.1751	-3.9644	0.00019704	0.0099501	-//-
Novel02176	0.48496	4.03259	38.7455	372.468	-3.265	2.8041e-06	0.00035744	-//-
Novel02254	1.55191	6.6517	131.567	697.691	-2.4068	5.4326e-09	2.6818e-06	-//-
Novel02255	1.38782	4.4517	36.2746	142.878	-1.9777	2.1006e-05	0.0018042	-//-
Novel02256	0.643733	1.86658	34.087	121.674	-1.8357	7.7906e-05	0.0049075	-//-
Novel02278	8.85755	104.346	84.9154	1225.21	-3.8509	0.00017357	0.0090679	-//-
Novel02331	0.320502	1.41109	48.8733	261.604	-2.4203	2.6665e-08	9.2144e-06	-//-
Novel02348	22.582	6.53273	198.001	69.3245	1.5141	0.00043206	0.01805	-//-
Novel02362	11.2019	3.37187	533.357	194.391	1.4561	0.00025788	0.012136	-//-
Novel02431	0.253665	0.863748	28.0998	118.332	-2.0742	1.4517e-05	0.0013558	-//-
Novel02437	1.6234	3.97051	35.1017	108.56	-1.6289	0.0016224	0.0478	-//-
Novel02457	1.96471	4.90566	81.8101	245.034	-1.5826	0.00010906	0.0063265	-//-
Novel02487	2.50672	6.66032	27.9784	93.5885	-1.742	0.00033807	0.01495	-//-
Novel02539	22.281	8.09439	814.985	357.437	1.1891	0.0016309	0.047933	-//-
