# Supplementary material for: Comparative transcriptome analysis reveals potentially novel roles of Homeobox genes in adipose deposition in fat-tailed sheep
Source: Sci Rep. 2017 Nov 3;7:14491. doi: 10.1038/s41598-017-14967-9 (PMC5670210; doi:10.1038/s41598-017-14967-9)
Supplement: Supplementary file 4 — Dataset 3 [file 41598_2017_14967_MOESM4_ESM.xlsx]

## Sheet: Supplementary Table S3
Supplementary Table S3. Differences in chromosomal location and number of HOX genes among five species of mammals.
Species	Genome assembly	Chromosomal location of HOXA genes	Chromosomal location of HOXA genes	Chromosomal location of HOXC genes	Chromosomal location of HOXD genes
Human (39)	GRCh38.p7	Chr7: HOXA1,HOXA2,HOXA3,HOXA4,HOXA5,HOXA6,HOXA7,HOXA9,HOXA10,HOXA11,HOXA13	Chr17: HOXB1,HOXB2,HOXB3,HOXB4,HOXB5,HOXB6,HOXB7,HOXB8,HOXB9,HOXB13	Chr12: HOXC4,HOXC5,HOXC6,HOXC8,HOXC9,HOXC10,HOXC11,HOXC12,HOXC13	Chr2: HOXD1,HOXD3,HOXD4,HOXD8,HOXC9,HOXD10,HOXD11,HOXD12,HOXD13
Mouse (39)	GRCm38.p5	Chr6: Hox-a1,Hox-a2,Hox-a3,Hox-a4,Hox-a5,Hox-a6,Hox-a7,Hox-a9,Hox-a10,Hox-a11,Hox-a13	Chr11: Hoxb-1,Hoxb-2,Hoxb-3,Hoxb-4,Hoxb-5,Hoxb-6,Hoxb-7,Hoxb-8,Hoxb-9	Chr15: Hoxc-4,Hoxc-5,Hoxc-6,Hoxc-8,Hoxc-9,Hoxc-10,Hoxc-11,Hoxc-12,Hoxc-13	Chr2: Hoxd-1,Hoxd-3,Hoxd-4,Hoxd-8,Hoxd-9,Hoxd-10,Hoxd-11,Hoxd-12,Hoxd-13
Cow (35)	UMD3.1	Chr4: HOXA1,HOXA2,HOXA3,HOXA4,HOXA5,HOXA6,HOXA7,HOXA10,HOXA11,HOXA13	Chr19: HOXB1,HOXB2,HOXB3,HOXB4,HOXB5,HOXB7,HOXB9,HOXB13	Chr5: HOXC4,HOXC5,HOXC6,HOXC8,HOXC9,HOXC10,HOXC11,HOXC12,HOXC13	Chr:2 HOXD1,HOXD3,HOXD4,HOXD9,HOXD10,HOXD11,HOXD12,HOXD13
Goat (39)	ASM170441v1	Chr4: HOXA1,HOXA2,HOXA3,HOXA4,HOXA5,HOXA6,HOXA7,HOXA9,HOXA10,HOXA11,HOXA13	Chr19: HOXB1,HOXB2,HOXB3,HOXB4,HOXB5,HOXB6,HOXB7,HOXB8,HOXB9,HOXB13	Chr5: HOXC4,HOXC5,HOXC6,HOXC8,HOXC9,HOXC10,HOXC11,HOXC12,HOXC13	Chr2: HOXD1,HOXD3,HOXD4,HOXD8,HOXD9,HOXD10,HOXD11,HOXD12,HOXD13
Sheep (39)	Oar_v4.0	Chr4: HOXA1,HOXA2,HOXA3,HOXA4,HOXA5,HOXA6,HOXA7,HOXA9,HOXA10,HOXA11,HOXA13	Chr11: HOXB1,HOXB2,HOXB3,HOXB4,HOXB5,HOXB6,HOXB7,HOXB8,HOXB9,HOXB13	Chr3: HOXC4,HOXC5,HOXC6,HOXC8,HOXC9,HOXC10,HOXC11,HOXC12,HOXC13	Chr2: HOXD1,HOXD3,HOXD4,HOXD8,HOXD9,HOXD10,HOXD11,HOXD12,HOXD13
