# Supplementary material for: Comparative transcriptome analysis reveals potentially novel roles of Homeobox genes in adipose deposition in fat-tailed sheep
Source: Sci Rep. 2017 Nov 3;7:14491. doi: 10.1038/s41598-017-14967-9 (PMC5670210; doi:10.1038/s41598-017-14967-9)
Supplement: Supplementary file 5 — Dataset 4 [file 41598_2017_14967_MOESM5_ESM.xlsx]

## Sheet: SATvs.VAT
Supplementary Table S4. Biological progress GO terms of DEGs from three comparison groups among different adipose depots.
GO_accession	Description	Term_type	Over_represented_pValue	Corrected_pValue	DEG_item	DEG_list	Bg_item	Bg_list	Up	Up_Gene_names	Down	Down_Gene_names
GO:0044699	single-organism process	biological_process	7.9204e-06	0.00091989	133	179	11151	19130	32	ENSOARG00000005515,Novel02382,ENSOARG00000013062,ENSOARG00000009845,ENSOARG00000015708,ENSOARG00000019395,Novel01101,ENSOARG00000005770,ENSOARG00000012378,ENSOARG00000017050,ENSOARG00000007533,ENSOARG00000006073,ENSOARG00000006063,ENSOARG00000010969,ENSOARG00000020442,ENSOARG00000000033,ENSOARG00000018722,ENSOARG00000008114,ENSOARG00000014525,ENSOARG00000007493,ENSOARG00000011075,ENSOARG000000203…	101	ENSOARG00000004964,ENSOARG00000016296,ENSOARG00000006139,ENSOARG00000003963,ENSOARG00000017562,ENSOARG00000005164,ENSOARG00000004356,ENSOARG00000016331,ENSOARG00000010939,ENSOARG00000005846,ENSOARG00000003099,ENSOARG00000019090,Novel01918,ENSOARG00000003620,ENSOARG00000000994,ENSOARG00000019971,ENSOARG00000006400,ENSOARG00000011235,ENSOARG00000003586,ENSOARG00000010462,ENSOARG00000020138,ENSOARG0…
GO:0065007	biological regulation	biological_process	3.3774e-08	1.3814e-05	118	179	8700	19130	26	ENSOARG00000019395,ENSOARG00000013062,ENSOARG00000015708,ENSOARG00000009845,ENSOARG00000017994,ENSOARG00000003437,Novel02382,ENSOARG00000020376,ENSOARG00000011075,ENSOARG00000014525,ENSOARG00000007493,ENSOARG00000018722,ENSOARG00000008114,ENSOARG00000020442,ENSOARG00000018341,ENSOARG00000010969,ENSOARG00000006063,ENSOARG00000002613,ENSOARG00000009090,ENSOARG00000007533,ENSOARG00000019884,ENSOARG0…	92	ENSOARG00000012461,ENSOARG00000014631,ENSOARG00000020249,ENSOARG00000014623,ENSOARG00000018894,ENSOARG00000004787,ENSOARG00000016306,ENSOARG00000020422,ENSOARG00000011437,ENSOARG00000010631,ENSOARG00000015718,ENSOARG00000012948,ENSOARG00000010493,ENSOARG00000009401,ENSOARG00000013931,ENSOARG00000013646,ENSOARG00000008127,ENSOARG00000013187,ENSOARG00000002307,ENSOARG00000013482,ENSOARG00000019197,…
GO:0044763	single-organism cellular process	biological_process	5.2613e-05	0.0048822	118	179	9757	19130	25	ENSOARG00000008114,ENSOARG00000018722,ENSOARG00000014525,ENSOARG00000007493,ENSOARG00000010969,ENSOARG00000020442,ENSOARG00000009845,ENSOARG00000015708,ENSOARG00000013062,ENSOARG00000019395,ENSOARG00000011075,Novel02382,ENSOARG00000017994,ENSOARG00000017050,ENSOARG00000020856,ENSOARG00000005770,ENSOARG00000012378,ENSOARG00000002613,ENSOARG00000006063,ENSOARG00000012075,ENSOARG00000012452,ENSOARG0…	93	ENSOARG00000003099,ENSOARG00000019090,ENSOARG00000016331,ENSOARG00000005846,ENSOARG00000010939,Novel01918,ENSOARG00000004964,ENSOARG00000017562,ENSOARG00000005164,ENSOARG00000004356,ENSOARG00000006139,ENSOARG00000003963,ENSOARG00000009791,ENSOARG00000009599,ENSOARG00000000123,ENSOARG00000006591,ENSOARG00000006908,ENSOARG00000014085,ENSOARG00000015970,ENSOARG00000008332,ENSOARG00000001680,ENSOARG0…
GO:0050789	regulation of biological process	biological_process	3.2184e-09	2.4141e-06	117	179	8309	19130	26	ENSOARG00000002613,ENSOARG00000006063,ENSOARG00000012075,ENSOARG00000012452,ENSOARG00000009090,ENSOARG00000007533,ENSOARG00000019884,ENSOARG00000006073,ENSOARG00000020856,Novel00685,ENSOARG00000013062,ENSOARG00000015708,ENSOARG00000009845,ENSOARG00000019395,Novel02382,ENSOARG00000011075,ENSOARG00000020376,ENSOARG00000003437,ENSOARG00000017994,ENSOARG00000018722,ENSOARG00000008114,ENSOARG000000074…	91	ENSOARG00000009401,ENSOARG00000008127,ENSOARG00000013931,ENSOARG00000013646,ENSOARG00000013482,ENSOARG00000013187,ENSOARG00000002307,ENSOARG00000018139,ENSOARG00000002740,ENSOARG00000004499,ENSOARG00000005579,ENSOARG00000019197,ENSOARG00000016306,ENSOARG00000004787,ENSOARG00000014631,ENSOARG00000012461,ENSOARG00000020249,ENSOARG00000014623,ENSOARG00000018894,ENSOARG00000011437,ENSOARG00000020422,…
GO:0050794	regulation of cellular process	biological_process	5.123e-10	5.425e-07	115	179	7893	19130	24	ENSOARG00000002613,ENSOARG00000006063,ENSOARG00000012452,ENSOARG00000012075,ENSOARG00000006073,ENSOARG00000019884,ENSOARG00000009090,ENSOARG00000007533,Novel00685,ENSOARG00000009845,ENSOARG00000015708,ENSOARG00000013062,ENSOARG00000019395,ENSOARG00000020376,ENSOARG00000011075,Novel02382,ENSOARG00000017994,ENSOARG00000003437,ENSOARG00000008114,ENSOARG00000018722,ENSOARG00000007493,ENSOARG000000145…	91	ENSOARG00000015215,ENSOARG00000016319,ENSOARG00000002808,ENSOARG00000002790,ENSOARG00000012131,ENSOARG00000009250,ENSOARG00000010445,ENSOARG00000001158,ENSOARG00000011967,ENSOARG00000015379,ENSOARG00000009999,ENSOARG00000009653,ENSOARG00000020563,ENSOARG00000010358,ENSOARG00000008893,ENSOARG00000017214,ENSOARG00000016334,ENSOARG00000019754,ENSOARG00000001202,ENSOARG00000009675,Novel00713,ENSOARG0…
GO:0050896	response to stimulus	biological_process	3.7848e-09	2.7254e-06	96	179	6193	19130	17	Novel02382,ENSOARG00000011075,ENSOARG00000017994,ENSOARG00000013062,ENSOARG00000009845,ENSOARG00000018341,ENSOARG00000010969,ENSOARG00000020442,ENSOARG00000018722,ENSOARG00000008114,ENSOARG00000007493,ENSOARG00000014525,ENSOARG00000012075,ENSOARG00000009090,ENSOARG00000007533,ENSOARG00000002613,ENSOARG00000006063	79	ENSOARG00000010462,ENSOARG00000020138,ENSOARG00000003586,ENSOARG00000011235,ENSOARG00000019971,ENSOARG00000003620,ENSOARG00000000994,ENSOARG00000015970,ENSOARG00000008332,ENSOARG00000014085,ENSOARG00000001680,ENSOARG00000001701,ENSOARG00000009791,ENSOARG00000000123,ENSOARG00000009599,ENSOARG00000006591,ENSOARG00000004356,ENSOARG00000005164,ENSOARG00000017562,ENSOARG00000006139,ENSOARG00000003963,…
GO:0051716	cellular response to stimulus	biological_process	5.9398e-07	0.00011256	80	179	5241	19130	14	ENSOARG00000009845,ENSOARG00000013062,ENSOARG00000002613,ENSOARG00000006063,Novel02382,ENSOARG00000012075,ENSOARG00000017994,ENSOARG00000007533,ENSOARG00000009090,ENSOARG00000008114,ENSOARG00000018722,ENSOARG00000014525,ENSOARG00000018341,ENSOARG00000020442	66	ENSOARG00000015718,ENSOARG00000010493,ENSOARG00000010631,ENSOARG00000011437,ENSOARG00000020422,ENSOARG00000004787,ENSOARG00000014623,ENSOARG00000018894,ENSOARG00000012461,ENSOARG00000014631,ENSOARG00000005579,ENSOARG00000004499,ENSOARG00000018139,ENSOARG00000019197,ENSOARG00000008507,ENSOARG00000002307,ENSOARG00000008127,ENSOARG00000013646,ENSOARG00000013931,ENSOARG00000009401,ENSOARG00000003963,…
GO:0044700	single organism signaling	biological_process	2.2447e-08	1.0753e-05	76	179	4526	19130	13	ENSOARG00000014525,ENSOARG00000018722,ENSOARG00000008114,ENSOARG00000020442,ENSOARG00000005770,ENSOARG00000006063,ENSOARG00000002613,ENSOARG00000009845,ENSOARG00000007533,ENSOARG00000009090,ENSOARG00000017994,ENSOARG00000012075,Novel02382	63	ENSOARG00000011437,ENSOARG00000020422,Novel00713,ENSOARG00000010631,ENSOARG00000014631,ENSOARG00000018894,ENSOARG00000014623,ENSOARG00000009172,ENSOARG00000004787,ENSOARG00000015718,ENSOARG00000010493,ENSOARG00000013931,ENSOARG00000008984,ENSOARG00000013646,ENSOARG00000008127,Novel01831,ENSOARG00000009401,ENSOARG00000016109,ENSOARG00000013941,ENSOARG00000019197,ENSOARG00000020968,ENSOARG000000181…
GO:0023052	signaling	biological_process	2.3894e-08	1.0753e-05	76	179	4532	19130	13	ENSOARG00000009845,ENSOARG00000002613,ENSOARG00000006063,ENSOARG00000012075,Novel02382,ENSOARG00000017994,ENSOARG00000007533,ENSOARG00000009090,ENSOARG00000008114,ENSOARG00000018722,ENSOARG00000014525,ENSOARG00000005770,ENSOARG00000020442	63	ENSOARG00000001680,ENSOARG00000014085,ENSOARG00000015970,ENSOARG00000008332,ENSOARG00000006591,ENSOARG00000009791,ENSOARG00000000123,ENSOARG00000017214,ENSOARG00000019754,ENSOARG00000009999,ENSOARG00000003586,ENSOARG00000009653,ENSOARG00000020138,ENSOARG00000020563,ENSOARG00000010462,ENSOARG00000003620,ENSOARG00000000994,ENSOARG00000019971,ENSOARG00000010358,ENSOARG00000011235,ENSOARG00000002790,…
GO:0007154	cell communication	biological_process	1.408e-07	3.7832e-05	76	179	4714	19130	13	ENSOARG00000008114,ENSOARG00000018722,ENSOARG00000014525,ENSOARG00000005770,ENSOARG00000020442,ENSOARG00000009845,ENSOARG00000002613,ENSOARG00000006063,ENSOARG00000012075,Novel02382,ENSOARG00000017994,ENSOARG00000009090,ENSOARG00000007533	63	ENSOARG00000002307,ENSOARG00000015723,ENSOARG00000019197,ENSOARG00000005579,ENSOARG00000019876,ENSOARG00000004499,ENSOARG00000020968,ENSOARG00000018139,ENSOARG00000009401,Novel01831,ENSOARG00000013941,ENSOARG00000016109,ENSOARG00000013646,ENSOARG00000008984,ENSOARG00000013931,ENSOARG00000008127,ENSOARG00000015718,ENSOARG00000010493,ENSOARG00000018894,ENSOARG00000014623,ENSOARG00000014631,ENSOARG0…
GO:0007165	signal transduction	biological_process	4.0868e-09	2.8297e-06	75	179	4277	19130	12	ENSOARG00000018722,ENSOARG00000008114,ENSOARG00000014525,ENSOARG00000020442,ENSOARG00000002613,ENSOARG00000009845,ENSOARG00000006063,ENSOARG00000012075,Novel02382,ENSOARG00000007533,ENSOARG00000009090,ENSOARG00000017994	63	ENSOARG00000019971,ENSOARG00000003620,ENSOARG00000000994,ENSOARG00000011235,ENSOARG00000010358,ENSOARG00000003586,ENSOARG00000009999,ENSOARG00000020563,ENSOARG00000010462,ENSOARG00000020138,ENSOARG00000009653,ENSOARG00000006591,ENSOARG00000017214,ENSOARG00000009791,ENSOARG00000000123,ENSOARG00000019754,ENSOARG00000001680,ENSOARG00000008332,ENSOARG00000015970,ENSOARG00000014085,ENSOARG00000004964,…
GO:0019222	regulation of metabolic process	biological_process	2.2026e-07	5.3583e-05	74	179	4559	19130	15	ENSOARG00000018722,ENSOARG00000007493,ENSOARG00000014525,Novel00685,ENSOARG00000013062,ENSOARG00000002613,ENSOARG00000006063,ENSOARG00000019395,ENSOARG00000011075,ENSOARG00000020376,ENSOARG00000012075,ENSOARG00000012452,ENSOARG00000019884,ENSOARG00000003437,ENSOARG00000009090	59	ENSOARG00000007840,ENSOARG00000016306,ENSOARG00000004787,ENSOARG00000009172,ENSOARG00000014623,ENSOARG00000002811,ENSOARG00000012461,ENSOARG00000011437,ENSOARG00000020422,ENSOARG00000009675,ENSOARG00000012948,ENSOARG00000015718,ENSOARG00000010493,ENSOARG00000001202,ENSOARG00000013941,ENSOARG00000012074,ENSOARG00000014103,ENSOARG00000009680,ENSOARG00000008984,ENSOARG00000015723,ENSOARG00000009758,…
GO:0044707	single-multicellular organism process	biological_process	9.1263e-06	0.0010398	72	179	4817	19130	16	ENSOARG00000003437,ENSOARG00000020376,ENSOARG00000019395,ENSOARG00000015708,ENSOARG00000020442,ENSOARG00000010969,ENSOARG00000014525,ENSOARG00000007493,ENSOARG00000018722,ENSOARG00000019884,ENSOARG00000006073,ENSOARG00000009090,ENSOARG00000012075,ENSOARG00000006063,ENSOARG00000002613,ENSOARG00000020856	56	ENSOARG00000013646,ENSOARG00000008984,ENSOARG00000013941,ENSOARG00000012074,ENSOARG00000009401,ENSOARG00000014103,ENSOARG00000009680,ENSOARG00000004499,ENSOARG00000005579,ENSOARG00000020968,ENSOARG00000002740,ENSOARG00000015006,ENSOARG00000009758,ENSOARG00000013482,ENSOARG00000014123,ENSOARG00000008507,ENSOARG00000002307,ENSOARG00000020422,ENSOARG00000007840,ENSOARG00000004787,ENSOARG00000016306,…
GO:0032501	multicellular organismal process	biological_process	3.8026e-05	0.0037612	72	179	5011	19130	16	ENSOARG00000015708,ENSOARG00000019395,ENSOARG00000020376,ENSOARG00000003437,ENSOARG00000018722,ENSOARG00000007493,ENSOARG00000014525,ENSOARG00000010969,ENSOARG00000020442,ENSOARG00000002613,ENSOARG00000006063,ENSOARG00000012075,ENSOARG00000009090,ENSOARG00000006073,ENSOARG00000019884,ENSOARG00000020856	56	ENSOARG00000002808,ENSOARG00000004356,ENSOARG00000005711,ENSOARG00000017562,ENSOARG00000016319,ENSOARG00000016296,ENSOARG00000019090,ENSOARG00000010939,ENSOARG00000016331,ENSOARG00000012131,ENSOARG00000002790,ENSOARG00000010358,ENSOARG00000011235,ENSOARG00000019971,ENSOARG00000016290,ENSOARG00000003620,ENSOARG00000020138,ENSOARG00000009653,ENSOARG00000015379,ENSOARG00000003586,ENSOARG00000009999,…
GO:0060255	regulation of macromolecule metabolic process	biological_process	1.0877e-07	3.3188e-05	68	179	3964	19130	15	ENSOARG00000013062,ENSOARG00000002613,ENSOARG00000006063,ENSOARG00000019395,ENSOARG00000011075,ENSOARG00000020376,ENSOARG00000012075,ENSOARG00000012452,ENSOARG00000019884,ENSOARG00000003437,ENSOARG00000009090,ENSOARG00000018722,ENSOARG00000014525,ENSOARG00000007493,Novel00685	53	ENSOARG00000004964,ENSOARG00000016296,ENSOARG00000003963,ENSOARG00000016319,ENSOARG00000017562,ENSOARG00000004356,ENSOARG00000016331,ENSOARG00000010939,ENSOARG00000001158,ENSOARG00000019090,ENSOARG00000002790,ENSOARG00000012131,ENSOARG00000000994,ENSOARG00000003620,ENSOARG00000011235,ENSOARG00000010358,ENSOARG00000015379,ENSOARG00000009999,ENSOARG00000011967,ENSOARG00000003586,ENSOARG00000009653,…
GO:0044767	single-organism developmental process	biological_process	2.4517e-07	5.7319e-05	67	179	3921	19130	14	ENSOARG00000020376,ENSOARG00000012075,ENSOARG00000019884,ENSOARG00000006073,ENSOARG00000003437,ENSOARG00000009090,ENSOARG00000015708,ENSOARG00000002613,ENSOARG00000019395,ENSOARG00000010969,ENSOARG00000020442,ENSOARG00000018722,ENSOARG00000007493,ENSOARG00000014525	53	ENSOARG00000009675,ENSOARG00000015718,ENSOARG00000012948,ENSOARG00000010493,ENSOARG00000014623,ENSOARG00000016306,ENSOARG00000004787,ENSOARG00000009172,ENSOARG00000020422,ENSOARG00000008507,ENSOARG00000014123,ENSOARG00000002307,ENSOARG00000009758,ENSOARG00000013482,ENSOARG00000015006,ENSOARG00000005579,ENSOARG00000004499,ENSOARG00000002740,ENSOARG00000020968,ENSOARG00000014103,ENSOARG00000009401,…
GO:0032502	developmental process	biological_process	3.2318e-07	7.1826e-05	67	179	3950	19130	14	ENSOARG00000020442,ENSOARG00000010969,ENSOARG00000014525,ENSOARG00000007493,ENSOARG00000018722,ENSOARG00000003437,ENSOARG00000019884,ENSOARG00000006073,ENSOARG00000009090,ENSOARG00000020376,ENSOARG00000012075,ENSOARG00000019395,ENSOARG00000015708,ENSOARG00000002613	53	ENSOARG00000016319,ENSOARG00000016296,ENSOARG00000005711,ENSOARG00000004356,ENSOARG00000017562,ENSOARG00000002808,ENSOARG00000012131,ENSOARG00000002790,ENSOARG00000010939,ENSOARG00000016331,ENSOARG00000019090,ENSOARG00000009999,ENSOARG00000015379,ENSOARG00000003586,ENSOARG00000020138,ENSOARG00000009653,ENSOARG00000019971,ENSOARG00000016290,ENSOARG00000003620,ENSOARG00000010358,ENSOARG00000011235,…
GO:0031323	regulation of cellular metabolic process	biological_process	7.3034e-07	0.0001328	66	179	3990	19130	14	ENSOARG00000013062,ENSOARG00000002613,ENSOARG00000019395,ENSOARG00000006063,ENSOARG00000012452,ENSOARG00000012075,ENSOARG00000020376,ENSOARG00000011075,ENSOARG00000009090,ENSOARG00000003437,ENSOARG00000018722,ENSOARG00000007493,ENSOARG00000014525,Novel00685	52	ENSOARG00000006908,ENSOARG00000017214,ENSOARG00000016334,ENSOARG00000001680,ENSOARG00000015970,ENSOARG00000008332,ENSOARG00000003620,ENSOARG00000000994,ENSOARG00000010358,ENSOARG00000011235,ENSOARG00000015379,ENSOARG00000011967,ENSOARG00000009999,ENSOARG00000003586,ENSOARG00000009653,ENSOARG00000020138,ENSOARG00000016331,ENSOARG00000010939,ENSOARG00000001158,ENSOARG00000019090,ENSOARG00000012131,…
GO:0007275	multicellular organismal development	biological_process	8.6762e-10	8.6771e-07	65	179	3258	19130	13	ENSOARG00000018722,ENSOARG00000007493,ENSOARG00000014525,ENSOARG00000020442,ENSOARG00000015708,ENSOARG00000002613,ENSOARG00000019395,ENSOARG00000020376,ENSOARG00000012075,ENSOARG00000006073,ENSOARG00000019884,ENSOARG00000003437,ENSOARG00000009090	52	ENSOARG00000015379,ENSOARG00000009999,ENSOARG00000003586,ENSOARG00000020138,ENSOARG00000003620,ENSOARG00000016290,ENSOARG00000019971,ENSOARG00000010358,ENSOARG00000011235,ENSOARG00000001680,ENSOARG00000006908,ENSOARG00000017214,ENSOARG00000000123,ENSOARG00000009599,ENSOARG00000016334,ENSOARG00000016296,ENSOARG00000016319,ENSOARG00000017562,ENSOARG00000005711,ENSOARG00000004356,ENSOARG00000002808,…
GO:0048856	anatomical structure development	biological_process	1.8102e-07	4.5897e-05	64	179	3635	19130	13	ENSOARG00000002613,ENSOARG00000015708,ENSOARG00000019395,ENSOARG00000012075,ENSOARG00000020376,ENSOARG00000009090,ENSOARG00000003437,ENSOARG00000019884,ENSOARG00000006073,ENSOARG00000018722,ENSOARG00000014525,ENSOARG00000007493,ENSOARG00000020442	51	ENSOARG00000004356,ENSOARG00000005711,ENSOARG00000017562,ENSOARG00000016319,ENSOARG00000016296,ENSOARG00000012131,ENSOARG00000002790,ENSOARG00000019090,ENSOARG00000010939,ENSOARG00000016331,ENSOARG00000020138,ENSOARG00000009999,ENSOARG00000015379,ENSOARG00000003586,ENSOARG00000011235,ENSOARG00000010358,ENSOARG00000016290,ENSOARG00000019971,ENSOARG00000003620,ENSOARG00000001680,ENSOARG00000016334,…
GO:0048731	system development	biological_process	2.2978e-10	2.5854e-07	63	179	3009	19130	13	ENSOARG00000015708,ENSOARG00000002613,ENSOARG00000019395,ENSOARG00000020376,ENSOARG00000012075,ENSOARG00000019884,ENSOARG00000003437,ENSOARG00000006073,ENSOARG00000009090,ENSOARG00000018722,ENSOARG00000014525,ENSOARG00000007493,ENSOARG00000020442	50	ENSOARG00000020138,ENSOARG00000003586,ENSOARG00000015379,ENSOARG00000009999,ENSOARG00000011235,ENSOARG00000010358,ENSOARG00000003620,ENSOARG00000019971,ENSOARG00000016290,ENSOARG00000001680,ENSOARG00000017214,ENSOARG00000000123,ENSOARG00000009599,ENSOARG00000016334,ENSOARG00000006908,ENSOARG00000017562,ENSOARG00000005711,ENSOARG00000004356,ENSOARG00000016296,ENSOARG00000016319,ENSOARG00000002790,…
GO:0080090	regulation of primary metabolic process	biological_process	4.2908e-06	0.00054787	63	179	3923	19130	13	Novel00685,ENSOARG00000007493,ENSOARG00000014525,ENSOARG00000018722,ENSOARG00000009090,ENSOARG00000003437,ENSOARG00000012452,ENSOARG00000012075,ENSOARG00000020376,ENSOARG00000019395,ENSOARG00000006063,ENSOARG00000013062,ENSOARG00000002613	50	ENSOARG00000001202,ENSOARG00000015718,ENSOARG00000012948,ENSOARG00000010493,ENSOARG00000009675,ENSOARG00000011437,ENSOARG00000020422,ENSOARG00000002811,ENSOARG00000014623,ENSOARG00000009172,ENSOARG00000016306,ENSOARG00000007840,ENSOARG00000004787,ENSOARG00000020968,ENSOARG00000018139,ENSOARG00000002740,ENSOARG00000004499,ENSOARG00000013482,ENSOARG00000015723,ENSOARG00000009758,ENSOARG00000008984,…
GO:0048518	positive regulation of biological process	biological_process	3.3257e-06	0.00046498	62	179	3792	19130	13	ENSOARG00000010969,ENSOARG00000020442,ENSOARG00000018722,ENSOARG00000014525,ENSOARG00000011075,ENSOARG00000012452,ENSOARG00000012075,ENSOARG00000006073,ENSOARG00000019884,ENSOARG00000003437,ENSOARG00000009090,ENSOARG00000009845,ENSOARG00000002613	49	ENSOARG00000004499,ENSOARG00000019876,ENSOARG00000020968,ENSOARG00000002740,ENSOARG00000012145,ENSOARG00000015006,ENSOARG00000013482,ENSOARG00000008127,ENSOARG00000013646,ENSOARG00000008984,ENSOARG00000013941,ENSOARG00000009401,ENSOARG00000014103,ENSOARG00000001202,ENSOARG00000009675,ENSOARG00000010493,ENSOARG00000015718,ENSOARG00000020422,ENSOARG00000004787,ENSOARG00000009172,ENSOARG00000020249,…
GO:0048522	positive regulation of cellular process	biological_process	3.6986e-07	7.6814e-05	59	179	3316	19130	13	ENSOARG00000010969,ENSOARG00000020442,ENSOARG00000018722,ENSOARG00000014525,ENSOARG00000011075,ENSOARG00000012075,ENSOARG00000012452,ENSOARG00000019884,ENSOARG00000003437,ENSOARG00000006073,ENSOARG00000009090,ENSOARG00000009845,ENSOARG00000002613	46	ENSOARG00000015006,ENSOARG00000002740,ENSOARG00000012145,ENSOARG00000020968,ENSOARG00000004499,ENSOARG00000013482,ENSOARG00000008984,ENSOARG00000013646,ENSOARG00000008127,ENSOARG00000009401,ENSOARG00000014103,ENSOARG00000013941,ENSOARG00000001202,ENSOARG00000010493,ENSOARG00000015718,ENSOARG00000009675,ENSOARG00000020422,ENSOARG00000020249,ENSOARG00000014623,ENSOARG00000009172,ENSOARG00000004787,…
GO:0010467	gene expression	biological_process	2.7517e-05	0.0028306	59	179	3812	19130	14	Novel00685,ENSOARG00000018722,ENSOARG00000007493,ENSOARG00000014525,ENSOARG00000020376,ENSOARG00000012452,ENSOARG00000012075,ENSOARG00000019884,ENSOARG00000003437,ENSOARG00000009090,ENSOARG00000013062,ENSOARG00000002613,ENSOARG00000006063,ENSOARG00000019395	45	ENSOARG00000001158,ENSOARG00000019090,ENSOARG00000016331,ENSOARG00000010939,ENSOARG00000002790,ENSOARG00000012131,ENSOARG00000004964,ENSOARG00000017562,ENSOARG00000004356,ENSOARG00000016296,ENSOARG00000016319,ENSOARG00000017214,ENSOARG00000016334,ENSOARG00000006908,ENSOARG00000015970,ENSOARG00000001680,ENSOARG00000011235,ENSOARG00000010358,ENSOARG00000003620,ENSOARG00000020138,ENSOARG00000003586,…
GO:0010468	regulation of gene expression	biological_process	2.9806e-08	1.2776e-05	56	179	2856	19130	12	Novel00685,ENSOARG00000014525,ENSOARG00000018722,ENSOARG00000009090,ENSOARG00000019884,ENSOARG00000003437,ENSOARG00000012075,ENSOARG00000020376,ENSOARG00000019395,ENSOARG00000006063,ENSOARG00000002613,ENSOARG00000013062	44	ENSOARG00000017214,ENSOARG00000016334,ENSOARG00000006908,ENSOARG00000015970,ENSOARG00000001680,ENSOARG00000011235,ENSOARG00000010358,ENSOARG00000003620,ENSOARG00000020138,ENSOARG00000009999,ENSOARG00000015379,ENSOARG00000011967,ENSOARG00000003586,ENSOARG00000019090,ENSOARG00000016331,ENSOARG00000010939,ENSOARG00000002790,ENSOARG00000012131,ENSOARG00000004964,ENSOARG00000017562,ENSOARG00000004356,…
GO:0048513	organ development	biological_process	3.4926e-11	4.1916e-08	55	179	2310	19130	12	ENSOARG00000020442,ENSOARG00000007493,ENSOARG00000014525,ENSOARG00000018722,ENSOARG00000019884,ENSOARG00000003437,ENSOARG00000006073,ENSOARG00000009090,ENSOARG00000020376,ENSOARG00000012075,ENSOARG00000019395,ENSOARG00000002613	43	ENSOARG00000008984,ENSOARG00000013646,ENSOARG00000013941,ENSOARG00000009680,ENSOARG00000009401,ENSOARG00000002740,ENSOARG00000020968,ENSOARG00000005579,ENSOARG00000004499,ENSOARG00000015006,ENSOARG00000009758,ENSOARG00000014123,ENSOARG00000008507,ENSOARG00000020422,ENSOARG00000009172,ENSOARG00000016306,ENSOARG00000004787,ENSOARG00000014623,ENSOARG00000015718,ENSOARG00000012948,ENSOARG00000010493,…
GO:0048519	negative regulation of biological process	biological_process	7.5893e-06	0.00088717	54	179	3203	19130	12	ENSOARG00000020442,ENSOARG00000018341,ENSOARG00000010969,ENSOARG00000014525,ENSOARG00000007493,ENSOARG00000018722,ENSOARG00000009090,ENSOARG00000003437,ENSOARG00000012452,ENSOARG00000020376,ENSOARG00000006063,ENSOARG00000002613	42	ENSOARG00000011235,ENSOARG00000010358,ENSOARG00000019971,ENSOARG00000009653,ENSOARG00000020138,ENSOARG00000015379,ENSOARG00000009999,ENSOARG00000000123,ENSOARG00000009791,ENSOARG00000017214,ENSOARG00000016334,ENSOARG00000015970,ENSOARG00000008332,ENSOARG00000001680,ENSOARG00000004964,ENSOARG00000017562,ENSOARG00000003963,ENSOARG00000005846,ENSOARG00000010939,ENSOARG00000002790,ENSOARG00000002307,…
GO:0048523	negative regulation of cellular process	biological_process	3.4522e-06	0.00046727	52	179	2955	19130	11	ENSOARG00000002613,ENSOARG00000006063,ENSOARG00000012452,ENSOARG00000020376,ENSOARG00000009090,ENSOARG00000003437,ENSOARG00000018722,ENSOARG00000007493,ENSOARG00000014525,ENSOARG00000010969,ENSOARG00000020442	41	ENSOARG00000010939,ENSOARG00000005846,ENSOARG00000002790,ENSOARG00000004964,ENSOARG00000003963,ENSOARG00000017562,ENSOARG00000009791,ENSOARG00000000123,ENSOARG00000017214,ENSOARG00000016334,ENSOARG00000001680,ENSOARG00000008332,ENSOARG00000015970,ENSOARG00000019971,ENSOARG00000011235,ENSOARG00000010358,ENSOARG00000015379,ENSOARG00000009999,ENSOARG00000020138,ENSOARG00000009653,ENSOARG00000007840,…
GO:0090304	nucleic acid metabolic process	biological_process	0.0010102	0.051985	51	179	3560	19130	11	ENSOARG00000014525,ENSOARG00000018722,Novel00685,ENSOARG00000019395,ENSOARG00000013062,ENSOARG00000002613,ENSOARG00000009090,ENSOARG00000003437,ENSOARG00000012452,ENSOARG00000012075,ENSOARG00000020376	40	ENSOARG00000013482,ENSOARG00000009758,ENSOARG00000002740,ENSOARG00000004499,ENSOARG00000009680,ENSOARG00000014103,ENSOARG00000013941,ENSOARG00000010493,ENSOARG00000012948,ENSOARG00000015718,ENSOARG00000009675,ENSOARG00000001202,ENSOARG00000002811,ENSOARG00000014623,ENSOARG00000009172,ENSOARG00000007840,ENSOARG00000016306,ENSOARG00000020422,Novel00812,ENSOARG00000010358,ENSOARG00000011235,ENSOARG0…
GO:0030154	cell differentiation	biological_process	3.5026e-07	7.5968e-05	49	179	2484	19130	7	ENSOARG00000020442,ENSOARG00000019884,ENSOARG00000012075,ENSOARG00000014525,ENSOARG00000002613,ENSOARG00000018722,ENSOARG00000015708	42	ENSOARG00000016306,ENSOARG00000004787,ENSOARG00000009172,ENSOARG00000014623,ENSOARG00000020422,ENSOARG00000015718,ENSOARG00000010493,ENSOARG00000012948,ENSOARG00000013941,ENSOARG00000012074,ENSOARG00000014103,ENSOARG00000009401,ENSOARG00000009680,ENSOARG00000013646,ENSOARG00000008984,ENSOARG00000013482,ENSOARG00000008507,ENSOARG00000014123,ENSOARG00000005579,ENSOARG00000004499,ENSOARG00000020968,…
GO:0010556	regulation of macromolecule biosynthetic process	biological_process	1.5045e-06	0.00023968	49	179	2638	19130	11	ENSOARG00000003437,ENSOARG00000009090,ENSOARG00000020376,ENSOARG00000012075,ENSOARG00000006063,ENSOARG00000019395,ENSOARG00000002613,ENSOARG00000013062,Novel00685,ENSOARG00000014525,ENSOARG00000018722	38	ENSOARG00000016296,ENSOARG00000016319,ENSOARG00000017562,ENSOARG00000004356,ENSOARG00000004964,ENSOARG00000012131,ENSOARG00000016331,ENSOARG00000010939,ENSOARG00000019090,ENSOARG00000009999,ENSOARG00000015379,ENSOARG00000003586,ENSOARG00000011967,ENSOARG00000003620,ENSOARG00000011235,ENSOARG00000010358,ENSOARG00000001680,ENSOARG00000015970,ENSOARG00000006908,ENSOARG00000017214,ENSOARG00000016334,…
GO:0031326	regulation of cellular biosynthetic process	biological_process	4.2623e-06	0.00054787	49	179	2737	19130	11	ENSOARG00000006063,ENSOARG00000019395,ENSOARG00000013062,ENSOARG00000002613,ENSOARG00000003437,ENSOARG00000009090,ENSOARG00000020376,ENSOARG00000012075,ENSOARG00000014525,ENSOARG00000018722,Novel00685	38	ENSOARG00000004964,ENSOARG00000016296,ENSOARG00000016319,ENSOARG00000017562,ENSOARG00000004356,ENSOARG00000016331,ENSOARG00000010939,ENSOARG00000019090,ENSOARG00000012131,ENSOARG00000003620,ENSOARG00000011235,ENSOARG00000010358,ENSOARG00000011967,ENSOARG00000015379,ENSOARG00000009999,ENSOARG00000003586,ENSOARG00000006908,ENSOARG00000017214,ENSOARG00000016334,ENSOARG00000001680,ENSOARG00000015970,…
GO:0048869	cellular developmental process	biological_process	4.9298e-06	0.0006206	49	179	2717	19130	7	ENSOARG00000019884,ENSOARG00000020442,ENSOARG00000012075,ENSOARG00000014525,ENSOARG00000015708,ENSOARG00000018722,ENSOARG00000002613	42	ENSOARG00000001680,ENSOARG00000017214,ENSOARG00000016334,ENSOARG00000006908,ENSOARG00000009653,ENSOARG00000020138,ENSOARG00000009999,ENSOARG00000015379,ENSOARG00000003586,ENSOARG00000010358,ENSOARG00000011235,ENSOARG00000003620,ENSOARG00000016290,ENSOARG00000002790,ENSOARG00000012131,ENSOARG00000019090,ENSOARG00000016331,ENSOARG00000010939,ENSOARG00000004356,ENSOARG00000008984,ENSOARG00000013646,…
GO:0009889	regulation of biosynthetic process	biological_process	5.7093e-06	0.00070396	49	179	2765	19130	11	ENSOARG00000018722,ENSOARG00000014525,Novel00685,ENSOARG00000002613,ENSOARG00000013062,ENSOARG00000019395,ENSOARG00000006063,ENSOARG00000012075,ENSOARG00000020376,ENSOARG00000009090,ENSOARG00000003437	38	ENSOARG00000008984,ENSOARG00000009680,ENSOARG00000013941,ENSOARG00000002740,ENSOARG00000004499,ENSOARG00000013482,ENSOARG00000009758,ENSOARG00000020422,ENSOARG00000002811,ENSOARG00000014623,ENSOARG00000009172,ENSOARG00000016306,ENSOARG00000007840,ENSOARG00000001202,ENSOARG00000012948,ENSOARG00000010493,ENSOARG00000009675,ENSOARG00000015970,ENSOARG00000001680,ENSOARG00000016334,ENSOARG00000017214,…
GO:0051171	regulation of nitrogen compound metabolic process	biological_process	1.1043e-05	0.0012424	49	179	2830	19130	11	Novel00685,ENSOARG00000018722,ENSOARG00000014525,ENSOARG00000012075,ENSOARG00000020376,ENSOARG00000009090,ENSOARG00000003437,ENSOARG00000013062,ENSOARG00000002613,ENSOARG00000019395,ENSOARG00000006063	38	ENSOARG00000015970,ENSOARG00000001680,ENSOARG00000017214,ENSOARG00000016334,ENSOARG00000006908,ENSOARG00000015379,ENSOARG00000003586,ENSOARG00000009999,ENSOARG00000011967,ENSOARG00000011235,ENSOARG00000010358,ENSOARG00000003620,ENSOARG00000012131,ENSOARG00000019090,ENSOARG00000016331,ENSOARG00000010939,ENSOARG00000017562,ENSOARG00000004356,ENSOARG00000016296,ENSOARG00000016319,ENSOARG00000004964,…
GO:0016070	RNA metabolic process	biological_process	6.592e-05	0.0057328	49	179	3029	19130	11	ENSOARG00000020376,ENSOARG00000012452,ENSOARG00000012075,ENSOARG00000003437,ENSOARG00000009090,ENSOARG00000013062,ENSOARG00000002613,ENSOARG00000019395,Novel00685,ENSOARG00000018722,ENSOARG00000014525	38	ENSOARG00000019090,ENSOARG00000010939,ENSOARG00000016331,ENSOARG00000012131,ENSOARG00000004964,ENSOARG00000004356,ENSOARG00000017562,ENSOARG00000016319,ENSOARG00000016296,ENSOARG00000017214,ENSOARG00000016334,ENSOARG00000006908,ENSOARG00000015970,ENSOARG00000001680,ENSOARG00000011235,ENSOARG00000010358,ENSOARG00000003620,ENSOARG00000015379,ENSOARG00000009999,ENSOARG00000003586,ENSOARG00000011967,…
GO:0019219	regulation of nucleobase-containing compound metabolic process	biological_process	5.505e-06	0.00068345	48	179	2678	19130	10	ENSOARG00000014525,ENSOARG00000018722,Novel00685,ENSOARG00000019395,ENSOARG00000002613,ENSOARG00000013062,ENSOARG00000009090,ENSOARG00000003437,ENSOARG00000012075,ENSOARG00000020376	38	ENSOARG00000007840,ENSOARG00000016306,ENSOARG00000009172,ENSOARG00000014623,ENSOARG00000002811,ENSOARG00000020422,ENSOARG00000009675,ENSOARG00000015718,ENSOARG00000010493,ENSOARG00000012948,ENSOARG00000001202,ENSOARG00000013941,ENSOARG00000009680,ENSOARG00000009758,ENSOARG00000013482,ENSOARG00000004499,ENSOARG00000002740,ENSOARG00000010939,ENSOARG00000016331,ENSOARG00000019090,ENSOARG00000012131,…
GO:2001141	regulation of RNA biosynthetic process	biological_process	4.5121e-07	8.9259e-05	47	179	2378	19130	10	ENSOARG00000019395,ENSOARG00000013062,ENSOARG00000002613,ENSOARG00000009090,ENSOARG00000003437,ENSOARG00000012075,ENSOARG00000020376,ENSOARG00000014525,ENSOARG00000018722,Novel00685	37	ENSOARG00000004499,ENSOARG00000002740,ENSOARG00000009758,ENSOARG00000013482,ENSOARG00000013941,ENSOARG00000009680,ENSOARG00000001202,ENSOARG00000009675,ENSOARG00000010493,ENSOARG00000012948,ENSOARG00000020422,ENSOARG00000007840,ENSOARG00000016306,ENSOARG00000009172,ENSOARG00000014623,ENSOARG00000002811,ENSOARG00000009999,ENSOARG00000015379,ENSOARG00000011967,ENSOARG00000003586,ENSOARG00000003620,…
GO:0048583	regulation of response to stimulus	biological_process	7.3841e-07	0.00013293	47	179	2409	19130	6	ENSOARG00000002613,ENSOARG00000018722,ENSOARG00000014525,ENSOARG00000012075,ENSOARG00000020442,ENSOARG00000009090	41	ENSOARG00000015718,ENSOARG00000010493,ENSOARG00000004787,ENSOARG00000014623,ENSOARG00000012461,ENSOARG00000020422,ENSOARG00000011437,ENSOARG00000014123,ENSOARG00000002307,ENSOARG00000004499,ENSOARG00000012145,ENSOARG00000020968,ENSOARG00000015006,ENSOARG00000013941,ENSOARG00000009401,ENSOARG00000008127,ENSOARG00000013646,ENSOARG00000008984,ENSOARG00000004964,ENSOARG00000015215,ENSOARG00000003963,…
GO:0051252	regulation of RNA metabolic process	biological_process	1.3427e-06	0.00021582	47	179	2469	19130	10	ENSOARG00000020376,ENSOARG00000012075,ENSOARG00000003437,ENSOARG00000009090,ENSOARG00000002613,ENSOARG00000013062,ENSOARG00000019395,Novel00685,ENSOARG00000018722,ENSOARG00000014525	37	ENSOARG00000004964,ENSOARG00000017562,ENSOARG00000004356,ENSOARG00000016296,ENSOARG00000016319,ENSOARG00000019090,ENSOARG00000016331,ENSOARG00000010939,ENSOARG00000012131,ENSOARG00000011235,ENSOARG00000010358,ENSOARG00000003620,ENSOARG00000015379,ENSOARG00000003586,ENSOARG00000009999,ENSOARG00000011967,ENSOARG00000017214,ENSOARG00000016334,ENSOARG00000006908,ENSOARG00000015970,ENSOARG00000001680,…
GO:0032774	RNA biosynthetic process	biological_process	1.8849e-06	0.00028585	47	179	2501	19130	10	Novel00685,ENSOARG00000014525,ENSOARG00000018722,ENSOARG00000003437,ENSOARG00000009090,ENSOARG00000020376,ENSOARG00000012075,ENSOARG00000019395,ENSOARG00000013062,ENSOARG00000002613	37	ENSOARG00000009999,ENSOARG00000015379,ENSOARG00000011967,ENSOARG00000003586,ENSOARG00000011235,ENSOARG00000010358,ENSOARG00000003620,ENSOARG00000015970,ENSOARG00000001680,ENSOARG00000016334,ENSOARG00000017214,ENSOARG00000006908,ENSOARG00000017562,ENSOARG00000004356,ENSOARG00000016296,ENSOARG00000016319,ENSOARG00000004964,ENSOARG00000012131,ENSOARG00000019090,ENSOARG00000016331,ENSOARG00000010939,…
GO:2000112	regulation of cellular macromolecule biosynthetic process	biological_process	3.8415e-06	0.00050849	47	179	2563	19130	11	ENSOARG00000014525,ENSOARG00000018722,Novel00685,ENSOARG00000006063,ENSOARG00000019395,ENSOARG00000013062,ENSOARG00000002613,ENSOARG00000003437,ENSOARG00000009090,ENSOARG00000020376,ENSOARG00000012075	36	ENSOARG00000009999,ENSOARG00000015379,ENSOARG00000003586,ENSOARG00000011967,ENSOARG00000003620,ENSOARG00000011235,ENSOARG00000010358,ENSOARG00000001680,ENSOARG00000015970,ENSOARG00000006908,ENSOARG00000017214,ENSOARG00000016334,ENSOARG00000016319,ENSOARG00000016296,ENSOARG00000004356,ENSOARG00000017562,ENSOARG00000012131,ENSOARG00000010939,ENSOARG00000016331,ENSOARG00000019090,ENSOARG00000004499,…
GO:0034654	nucleobase-containing compound biosynthetic process	biological_process	2.7304e-05	0.0028249	47	179	2763	19130	10	ENSOARG00000014525,ENSOARG00000018722,Novel00685,ENSOARG00000019395,ENSOARG00000013062,ENSOARG00000002613,ENSOARG00000009090,ENSOARG00000003437,ENSOARG00000012075,ENSOARG00000020376	37	ENSOARG00000015379,ENSOARG00000009999,ENSOARG00000003586,ENSOARG00000011967,ENSOARG00000003620,ENSOARG00000011235,ENSOARG00000010358,ENSOARG00000001680,ENSOARG00000015970,ENSOARG00000006908,ENSOARG00000017214,ENSOARG00000016334,ENSOARG00000016296,ENSOARG00000016319,ENSOARG00000017562,ENSOARG00000004356,ENSOARG00000004964,ENSOARG00000012131,ENSOARG00000016331,ENSOARG00000010939,ENSOARG00000019090,…
GO:0019438	aromatic compound biosynthetic process	biological_process	4.8916e-05	0.0045864	47	179	2827	19130	10	ENSOARG00000019395,ENSOARG00000002613,ENSOARG00000013062,ENSOARG00000009090,ENSOARG00000003437,ENSOARG00000012075,ENSOARG00000020376,ENSOARG00000014525,ENSOARG00000018722,Novel00685	37	ENSOARG00000019090,ENSOARG00000016331,ENSOARG00000010939,ENSOARG00000012131,ENSOARG00000004964,ENSOARG00000017562,ENSOARG00000004356,ENSOARG00000016296,ENSOARG00000016319,ENSOARG00000017214,ENSOARG00000016334,ENSOARG00000006908,ENSOARG00000015970,ENSOARG00000001680,ENSOARG00000010358,ENSOARG00000011235,ENSOARG00000003620,ENSOARG00000003586,ENSOARG00000015379,ENSOARG00000009999,ENSOARG00000011967,…
GO:0018130	heterocycle biosynthetic process	biological_process	5.0588e-05	0.0047186	47	179	2831	19130	10	ENSOARG00000014525,ENSOARG00000018722,Novel00685,ENSOARG00000019395,ENSOARG00000002613,ENSOARG00000013062,ENSOARG00000003437,ENSOARG00000009090,ENSOARG00000020376,ENSOARG00000012075	37	ENSOARG00000009680,ENSOARG00000013941,ENSOARG00000002740,ENSOARG00000004499,ENSOARG00000013482,ENSOARG00000009758,ENSOARG00000020422,ENSOARG00000002811,ENSOARG00000014623,ENSOARG00000009172,ENSOARG00000016306,ENSOARG00000007840,ENSOARG00000001202,ENSOARG00000010493,ENSOARG00000012948,ENSOARG00000009675,ENSOARG00000015970,ENSOARG00000001680,ENSOARG00000017214,ENSOARG00000016334,ENSOARG00000006908,…
GO:1901362	organic cyclic compound biosynthetic process	biological_process	8.6398e-05	0.0070698	47	179	2892	19130	10	Novel00685,ENSOARG00000018722,ENSOARG00000014525,ENSOARG00000020376,ENSOARG00000012075,ENSOARG00000003437,ENSOARG00000009090,ENSOARG00000013062,ENSOARG00000002613,ENSOARG00000019395	37	ENSOARG00000004964,ENSOARG00000016319,ENSOARG00000016296,ENSOARG00000004356,ENSOARG00000017562,ENSOARG00000010939,ENSOARG00000016331,ENSOARG00000019090,ENSOARG00000012131,ENSOARG00000003620,ENSOARG00000010358,ENSOARG00000011235,ENSOARG00000009999,ENSOARG00000015379,ENSOARG00000003586,ENSOARG00000011967,ENSOARG00000006908,ENSOARG00000017214,ENSOARG00000016334,ENSOARG00000001680,ENSOARG00000015970,…
GO:0007166	cell surface receptor signaling pathway	biological_process	7.038e-13	1.4175e-09	46	179	1526	19130	7	ENSOARG00000014525,ENSOARG00000006063,ENSOARG00000002613,ENSOARG00000009845,ENSOARG00000007533,ENSOARG00000017994,ENSOARG00000020442	39	ENSOARG00000016109,ENSOARG00000013941,ENSOARG00000008127,ENSOARG00000008984,ENSOARG00000013646,ENSOARG00000002307,ENSOARG00000018139,ENSOARG00000020968,ENSOARG00000005579,ENSOARG00000004499,ENSOARG00000019197,ENSOARG00000009172,ENSOARG00000004787,ENSOARG00000014631,ENSOARG00000018894,ENSOARG00000020422,ENSOARG00000010631,ENSOARG00000015718,ENSOARG00000010493,ENSOARG00000000123,ENSOARG00000001680,…
GO:0006355	regulation of transcription, DNA-templated	biological_process	8.7452e-07	0.00015138	46	179	2355	19130	10	ENSOARG00000019395,ENSOARG00000013062,ENSOARG00000002613,ENSOARG00000009090,ENSOARG00000003437,ENSOARG00000012075,ENSOARG00000020376,ENSOARG00000014525,ENSOARG00000018722,Novel00685	36	ENSOARG00000004356,ENSOARG00000017562,ENSOARG00000016319,ENSOARG00000016296,ENSOARG00000012131,ENSOARG00000019090,ENSOARG00000010939,ENSOARG00000016331,ENSOARG00000009999,ENSOARG00000015379,ENSOARG00000003586,ENSOARG00000011967,ENSOARG00000010358,ENSOARG00000011235,ENSOARG00000003620,ENSOARG00000015970,ENSOARG00000001680,ENSOARG00000017214,ENSOARG00000016334,ENSOARG00000006908,ENSOARG00000001202,…
GO:1903506	regulation of nucleic acid-templated transcription	biological_process	1.0832e-06	0.0001789	46	179	2373	19130	10	ENSOARG00000020376,ENSOARG00000012075,ENSOARG00000003437,ENSOARG00000009090,ENSOARG00000002613,ENSOARG00000013062,ENSOARG00000019395,Novel00685,ENSOARG00000018722,ENSOARG00000014525	36	ENSOARG00000013941,ENSOARG00000009680,ENSOARG00000004499,ENSOARG00000002740,ENSOARG00000009758,ENSOARG00000013482,ENSOARG00000020422,ENSOARG00000007840,ENSOARG00000016306,ENSOARG00000009172,ENSOARG00000014623,ENSOARG00000002811,ENSOARG00000001202,ENSOARG00000009675,ENSOARG00000010493,ENSOARG00000012948,ENSOARG00000001680,ENSOARG00000015970,ENSOARG00000006908,ENSOARG00000017214,ENSOARG00000016334,…
GO:0006351	transcription, DNA-templated	biological_process	3.2328e-06	0.00045824	46	179	2470	19130	10	ENSOARG00000019395,ENSOARG00000013062,ENSOARG00000002613,ENSOARG00000009090,ENSOARG00000003437,ENSOARG00000012075,ENSOARG00000020376,ENSOARG00000014525,ENSOARG00000018722,Novel00685	36	ENSOARG00000011967,ENSOARG00000015379,ENSOARG00000009999,ENSOARG00000003586,ENSOARG00000011235,ENSOARG00000010358,ENSOARG00000003620,ENSOARG00000015970,ENSOARG00000001680,ENSOARG00000016334,ENSOARG00000017214,ENSOARG00000006908,ENSOARG00000004356,ENSOARG00000017562,ENSOARG00000016319,ENSOARG00000016296,ENSOARG00000012131,ENSOARG00000019090,ENSOARG00000010939,ENSOARG00000016331,ENSOARG00000004499,…
GO:0097659	nucleic acid-templated transcription	biological_process	3.8946e-06	0.00051176	46	179	2487	19130	10	Novel00685,ENSOARG00000014525,ENSOARG00000018722,ENSOARG00000009090,ENSOARG00000003437,ENSOARG00000012075,ENSOARG00000020376,ENSOARG00000019395,ENSOARG00000002613,ENSOARG00000013062	36	ENSOARG00000004499,ENSOARG00000002740,ENSOARG00000009758,ENSOARG00000013482,ENSOARG00000009680,ENSOARG00000013941,ENSOARG00000001202,ENSOARG00000009675,ENSOARG00000010493,ENSOARG00000012948,ENSOARG00000020422,ENSOARG00000014623,ENSOARG00000002811,ENSOARG00000007840,ENSOARG00000016306,ENSOARG00000009172,ENSOARG00000011967,ENSOARG00000015379,ENSOARG00000009999,ENSOARG00000003586,ENSOARG00000010358,…
GO:0002376	immune system process	biological_process	1.2607e-12	1.8913e-09	45	179	1506	19130	2	ENSOARG00000010969,ENSOARG00000011075	43	ENSOARG00000013941,ENSOARG00000009551,ENSOARG00000009680,ENSOARG00000017249,ENSOARG00000009401,ENSOARG00000008984,ENSOARG00000013646,ENSOARG00000020968,ENSOARG00000012145,ENSOARG00000005579,ENSOARG00000015006,ENSOARG00000014069,ENSOARG00000009172,ENSOARG00000004787,ENSOARG00000014623,ENSOARG00000011437,ENSOARG00000020422,ENSOARG00000015718,ENSOARG00000009042,ENSOARG00000006908,ENSOARG00000000123,…
GO:0023051	regulation of signaling	biological_process	5.3939e-07	0.00010339	42	179	2001	19130	6	ENSOARG00000012075,ENSOARG00000020442,ENSOARG00000009090,ENSOARG00000002613,ENSOARG00000006063,ENSOARG00000014525	36	ENSOARG00000010358,ENSOARG00000003620,ENSOARG00000000994,ENSOARG00000009653,ENSOARG00000020138,ENSOARG00000003586,ENSOARG00000000123,ENSOARG00000009791,ENSOARG00000014085,ENSOARG00000008332,ENSOARG00000015970,ENSOARG00000001680,ENSOARG00000004964,ENSOARG00000005164,ENSOARG00000017562,ENSOARG00000004356,ENSOARG00000003963,ENSOARG00000015215,ENSOARG00000001158,ENSOARG00000019090,ENSOARG00000005846,…
GO:0010646	regulation of cell communication	biological_process	9.3504e-07	0.0001588	42	179	2042	19130	6	ENSOARG00000009090,ENSOARG00000020442,ENSOARG00000012075,ENSOARG00000014525,ENSOARG00000006063,ENSOARG00000002613	36	ENSOARG00000014085,ENSOARG00000008332,ENSOARG00000015970,ENSOARG00000001680,ENSOARG00000009791,ENSOARG00000000123,ENSOARG00000009653,ENSOARG00000020138,ENSOARG00000003586,ENSOARG00000010358,ENSOARG00000003620,ENSOARG00000000994,ENSOARG00000002790,ENSOARG00000001158,ENSOARG00000019090,ENSOARG00000005846,ENSOARG00000005164,ENSOARG00000017562,ENSOARG00000004356,ENSOARG00000015215,ENSOARG00000003963,…
GO:0009893	positive regulation of metabolic process	biological_process	0.00035656	0.021907	39	179	2369	19130	7	ENSOARG00000014525,ENSOARG00000002613,ENSOARG00000018722,ENSOARG00000019884,ENSOARG00000003437,ENSOARG00000011075,ENSOARG00000012075	32	ENSOARG00000020138,ENSOARG00000011967,ENSOARG00000015379,ENSOARG00000009999,ENSOARG00000003586,ENSOARG00000010358,ENSOARG00000000994,ENSOARG00000008332,ENSOARG00000001680,ENSOARG00000017214,ENSOARG00000016334,ENSOARG00000004356,ENSOARG00000017562,ENSOARG00000004964,ENSOARG00000012131,ENSOARG00000019090,ENSOARG00000001158,ENSOARG00000010939,ENSOARG00000019876,ENSOARG00000004499,ENSOARG00000020968,…
GO:0009966	regulation of signal transduction	biological_process	1.8895e-06	0.00028585	38	179	1800	19130	5	ENSOARG00000012075,ENSOARG00000020442,ENSOARG00000009090,ENSOARG00000002613,ENSOARG00000014525	33	ENSOARG00000000994,ENSOARG00000003620,ENSOARG00000010358,ENSOARG00000003586,ENSOARG00000009653,ENSOARG00000009791,ENSOARG00000000123,ENSOARG00000001680,ENSOARG00000015970,ENSOARG00000008332,ENSOARG00000014085,ENSOARG00000004964,ENSOARG00000003963,ENSOARG00000004356,ENSOARG00000017562,ENSOARG00000005164,ENSOARG00000005846,ENSOARG00000019090,ENSOARG00000001158,ENSOARG00000002790,ENSOARG00000002307,…
GO:0009892	negative regulation of metabolic process	biological_process	3.0832e-06	0.00044051	37	179	1773	19130	8	ENSOARG00000012452,ENSOARG00000020376,ENSOARG00000009090,ENSOARG00000003437,ENSOARG00000002613,ENSOARG00000006063,ENSOARG00000018722,ENSOARG00000007493	29	ENSOARG00000010358,ENSOARG00000011235,ENSOARG00000019971,ENSOARG00000009653,ENSOARG00000015379,ENSOARG00000009999,ENSOARG00000002740,ENSOARG00000017214,ENSOARG00000014103,ENSOARG00000012074,ENSOARG00000013941,ENSOARG00000008984,ENSOARG00000015970,ENSOARG00000008332,ENSOARG00000001680,ENSOARG00000015718,ENSOARG00000012948,ENSOARG00000010493,ENSOARG00000004964,ENSOARG00000001202,ENSOARG00000003963,…
GO:0035556	intracellular signal transduction	biological_process	5.4124e-06	0.00067662	37	179	1801	19130	6	ENSOARG00000018722,ENSOARG00000006063,ENSOARG00000014525,ENSOARG00000012075,ENSOARG00000020442,ENSOARG00000009090	31	ENSOARG00000015970,ENSOARG00000013646,ENSOARG00000008332,ENSOARG00000008984,ENSOARG00000001680,Novel01831,ENSOARG00000013941,ENSOARG00000020563,ENSOARG00000010462,ENSOARG00000020138,ENSOARG00000009653,ENSOARG00000020968,ENSOARG00000003586,ENSOARG00000011235,ENSOARG00000015723,ENSOARG00000019971,ENSOARG00000000994,ENSOARG00000010631,ENSOARG00000011437,ENSOARG00000020422,ENSOARG00000019090,ENSOARG0…
GO:0051239	regulation of multicellular organismal process	biological_process	6.0766e-06	0.00073913	37	179	1821	19130	8	ENSOARG00000018722,ENSOARG00000014525,ENSOARG00000010969,ENSOARG00000002613,ENSOARG00000015708,ENSOARG00000012075,ENSOARG00000009090,ENSOARG00000019884	29	ENSOARG00000017562,ENSOARG00000004356,ENSOARG00000015718,ENSOARG00000012131,ENSOARG00000020422,ENSOARG00000004787,ENSOARG00000010939,ENSOARG00000019090,ENSOARG00000020249,ENSOARG00000020968,ENSOARG00000015379,ENSOARG00000005579,ENSOARG00000009653,ENSOARG00000015006,ENSOARG00000020138,ENSOARG00000013482,ENSOARG00000019971,ENSOARG00000014123,ENSOARG00000010358,ENSOARG00000001680,ENSOARG00000008984,…
GO:0010604	positive regulation of macromolecule metabolic process	biological_process	3.45e-05	0.0034657	37	179	1972	19130	7	ENSOARG00000003437,ENSOARG00000019884,ENSOARG00000012075,ENSOARG00000011075,ENSOARG00000014525,ENSOARG00000018722,ENSOARG00000002613	30	ENSOARG00000012131,ENSOARG00000020422,ENSOARG00000009172,ENSOARG00000010939,ENSOARG00000001158,ENSOARG00000014623,ENSOARG00000019090,ENSOARG00000001202,ENSOARG00000017562,ENSOARG00000004356,ENSOARG00000010493,ENSOARG00000015718,ENSOARG00000004964,ENSOARG00000009675,ENSOARG00000001680,ENSOARG00000008984,ENSOARG00000008332,ENSOARG00000016334,ENSOARG00000017214,ENSOARG00000002740,ENSOARG00000015379,…
GO:0031325	positive regulation of cellular metabolic process	biological_process	3.4654e-05	0.0034657	37	179	1974	19130	6	ENSOARG00000003437,ENSOARG00000011075,ENSOARG00000012075,ENSOARG00000014525,ENSOARG00000018722,ENSOARG00000002613	31	ENSOARG00000004356,ENSOARG00000017562,ENSOARG00000001202,ENSOARG00000009675,ENSOARG00000004964,ENSOARG00000010493,ENSOARG00000015718,ENSOARG00000012131,ENSOARG00000020422,ENSOARG00000010939,ENSOARG00000009172,ENSOARG00000014623,ENSOARG00000019090,ENSOARG00000001158,ENSOARG00000004499,ENSOARG00000015379,ENSOARG00000009999,ENSOARG00000011967,ENSOARG00000003586,ENSOARG00000002740,ENSOARG00000020968,…
GO:0009653	anatomical structure morphogenesis	biological_process	4.3361e-05	0.0041521	37	179	1962	19130	8	ENSOARG00000020376,ENSOARG00000012075,ENSOARG00000003437,ENSOARG00000009090,ENSOARG00000002613,ENSOARG00000019395,ENSOARG00000020442,ENSOARG00000014525	29	ENSOARG00000017562,ENSOARG00000005711,ENSOARG00000016319,ENSOARG00000012948,ENSOARG00000009675,ENSOARG00000020422,ENSOARG00000002790,ENSOARG00000014623,ENSOARG00000016331,ENSOARG00000016306,ENSOARG00000004787,ENSOARG00000010939,ENSOARG00000020138,ENSOARG00000015379,ENSOARG00000003586,ENSOARG00000009999,ENSOARG00000004499,ENSOARG00000005579,ENSOARG00000010358,ENSOARG00000008507,ENSOARG00000009758,…
GO:0010033	response to organic substance	biological_process	4.0943e-08	1.5682e-05	36	179	1423	19130	8	ENSOARG00000009090,ENSOARG00000011075,ENSOARG00000006063,ENSOARG00000009845,ENSOARG00000010969,ENSOARG00000014525,ENSOARG00000018722,ENSOARG00000008114	28	ENSOARG00000010939,ENSOARG00000004787,ENSOARG00000018894,ENSOARG00000014631,ENSOARG00000002790,ENSOARG00000010445,ENSOARG00000020422,ENSOARG00000004964,ENSOARG00000012948,ENSOARG00000010493,ENSOARG00000017562,ENSOARG00000013941,ENSOARG00000016109,ENSOARG00000014103,ENSOARG00000009401,ENSOARG00000017214,ENSOARG00000000123,ENSOARG00000001680,ENSOARG00000003620,ENSOARG00000008507,ENSOARG00000010358,…
GO:0010605	negative regulation of macromolecule metabolic process	biological_process	2.1133e-06	0.00031703	35	179	1599	19130	8	ENSOARG00000007493,ENSOARG00000018722,ENSOARG00000003437,ENSOARG00000009090,ENSOARG00000020376,ENSOARG00000012452,ENSOARG00000006063,ENSOARG00000002613	27	ENSOARG00000015379,ENSOARG00000002740,ENSOARG00000009999,ENSOARG00000009653,ENSOARG00000011235,ENSOARG00000010358,ENSOARG00000001680,ENSOARG00000008984,ENSOARG00000015970,ENSOARG00000008332,ENSOARG00000013941,ENSOARG00000017214,ENSOARG00000014103,ENSOARG00000003963,ENSOARG00000001202,ENSOARG00000012948,ENSOARG00000010493,ENSOARG00000015718,ENSOARG00000004964,ENSOARG00000002790,ENSOARG00000020422,…
GO:0050793	regulation of developmental process	biological_process	4.5649e-06	0.00057871	34	179	1577	19130	9	ENSOARG00000010969,ENSOARG00000020442,ENSOARG00000018722,ENSOARG00000014525,ENSOARG00000012075,ENSOARG00000009090,ENSOARG00000019884,ENSOARG00000002613,ENSOARG00000015708	25	ENSOARG00000006908,ENSOARG00000013941,ENSOARG00000000123,ENSOARG00000016334,ENSOARG00000009680,ENSOARG00000014103,ENSOARG00000001680,ENSOARG00000008984,ENSOARG00000013646,ENSOARG00000013482,ENSOARG00000011235,ENSOARG00000010358,ENSOARG00000014123,ENSOARG00000015379,ENSOARG00000002740,ENSOARG00000020968,ENSOARG00000005579,ENSOARG00000015006,ENSOARG00000020138,ENSOARG00000004787,ENSOARG00000012131,…
GO:0008283	cell proliferation	biological_process	4.3186e-08	1.6196e-05	33	179	1233	19130	10	ENSOARG00000018722,ENSOARG00000014525,ENSOARG00000010969,ENSOARG00000020442,ENSOARG00000009845,ENSOARG00000002613,ENSOARG00000012452,ENSOARG00000012075,ENSOARG00000006073,ENSOARG00000009090	23	ENSOARG00000002790,ENSOARG00000012131,ENSOARG00000009250,ENSOARG00000010445,ENSOARG00000020422,ENSOARG00000004787,ENSOARG00000010939,ENSOARG00000019090,ENSOARG00000017562,ENSOARG00000004356,ENSOARG00000015718,ENSOARG00000004964,ENSOARG00000001680,ENSOARG00000008984,ENSOARG00000013646,ENSOARG00000013941,ENSOARG00000009999,ENSOARG00000002740,ENSOARG00000003586,ENSOARG00000004499,ENSOARG00000015006,…
GO:0048584	positive regulation of response to stimulus	biological_process	4.7277e-08	1.7369e-05	33	179	1237	19130	5	ENSOARG00000012075,ENSOARG00000020442,ENSOARG00000009090,ENSOARG00000002613,ENSOARG00000014525	28	ENSOARG00000000123,ENSOARG00000009401,ENSOARG00000013941,ENSOARG00000014085,ENSOARG00000008984,ENSOARG00000013646,ENSOARG00000015970,ENSOARG00000008332,ENSOARG00000008127,ENSOARG00000001680,ENSOARG00000003620,ENSOARG00000000994,ENSOARG00000015006,ENSOARG00000003586,ENSOARG00000020968,ENSOARG00000004499,ENSOARG00000001158,ENSOARG00000019090,ENSOARG00000010939,ENSOARG00000004787,ENSOARG00000020422,…
GO:0031324	negative regulation of cellular metabolic process	biological_process	1.4983e-05	0.0016347	33	179	1601	19130	8	ENSOARG00000006063,ENSOARG00000002613,ENSOARG00000009090,ENSOARG00000003437,ENSOARG00000012452,ENSOARG00000020376,ENSOARG00000007493,ENSOARG00000018722	25	ENSOARG00000001202,ENSOARG00000003963,ENSOARG00000012948,ENSOARG00000015718,ENSOARG00000010493,ENSOARG00000004964,ENSOARG00000011437,ENSOARG00000020422,ENSOARG00000014623,ENSOARG00000010939,ENSOARG00000007840,ENSOARG00000016306,ENSOARG00000004787,ENSOARG00000009653,ENSOARG00000009999,ENSOARG00000015379,ENSOARG00000002740,ENSOARG00000010358,ENSOARG00000011235,ENSOARG00000008332,ENSOARG00000015970,…
GO:0070887	cellular response to chemical stimulus	biological_process	4.2912e-06	0.00054787	32	179	1439	19130	5	ENSOARG00000014525,ENSOARG00000006063,ENSOARG00000009845,ENSOARG00000009090,ENSOARG00000018341	27	ENSOARG00000004787,ENSOARG00000010939,ENSOARG00000018894,ENSOARG00000012461,ENSOARG00000014631,ENSOARG00000002790,ENSOARG00000010445,ENSOARG00000020422,ENSOARG00000004964,ENSOARG00000010493,ENSOARG00000017562,ENSOARG00000001202,ENSOARG00000013941,ENSOARG00000016109,ENSOARG00000017214,ENSOARG00000000123,ENSOARG00000001680,ENSOARG00000003620,ENSOARG00000008507,ENSOARG00000010358,ENSOARG00000004499,…
GO:0065009	regulation of molecular function	biological_process	0.00026349	0.017063	32	179	1766	19130	7	ENSOARG00000018722,ENSOARG00000007493,ENSOARG00000014525,ENSOARG00000011075,ENSOARG00000012075,ENSOARG00000012452,ENSOARG00000009090	25	ENSOARG00000011235,ENSOARG00000000994,ENSOARG00000015723,ENSOARG00000019971,ENSOARG00000009653,ENSOARG00000009999,ENSOARG00000019876,ENSOARG00000017214,ENSOARG00000012074,ENSOARG00000013941,ENSOARG00000008332,ENSOARG00000008893,ENSOARG00000001680,ENSOARG00000015718,ENSOARG00000004964,ENSOARG00000004356,ENSOARG00000003963,ENSOARG00000001158,ENSOARG00000002811,ENSOARG00000003099,ENSOARG00000019090,…
GO:0008219	cell death	biological_process	1.3404e-07	3.7123e-05	31	179	1163	19130	4	ENSOARG00000009090,ENSOARG00000010969,ENSOARG00000019395,ENSOARG00000007493	27	ENSOARG00000009999,ENSOARG00000020138,ENSOARG00000019197,ENSOARG00000011235,ENSOARG00000001680,ENSOARG00000008127,ENSOARG00000008332,ENSOARG00000008984,ENSOARG00000013941,ENSOARG00000016334,ENSOARG00000009599,ENSOARG00000017214,ENSOARG00000000123,ENSOARG00000004356,ENSOARG00000017562,ENSOARG00000001202,ENSOARG00000004964,ENSOARG00000012948,ENSOARG00000015718,ENSOARG00000010493,ENSOARG00000012131,…
GO:0016265	death	biological_process	1.3404e-07	3.7123e-05	31	179	1163	19130	4	ENSOARG00000007493,ENSOARG00000019395,ENSOARG00000010969,ENSOARG00000009090	27	ENSOARG00000013941,ENSOARG00000009599,ENSOARG00000016334,ENSOARG00000017214,ENSOARG00000000123,ENSOARG00000001680,ENSOARG00000008127,ENSOARG00000008332,ENSOARG00000008984,ENSOARG00000011235,ENSOARG00000009999,ENSOARG00000020138,ENSOARG00000019197,ENSOARG00000004787,ENSOARG00000005846,ENSOARG00000010939,ENSOARG00000019090,ENSOARG00000012131,ENSOARG00000002790,ENSOARG00000008703,ENSOARG00000004964,…
GO:0006366	transcription from RNA polymerase II promoter	biological_process	2.5132e-06	0.00036782	31	179	1331	19130	6	ENSOARG00000003437,ENSOARG00000020376,ENSOARG00000012075,ENSOARG00000014525,ENSOARG00000002613,ENSOARG00000018722	25	ENSOARG00000015970,ENSOARG00000001680,ENSOARG00000017214,ENSOARG00000016334,ENSOARG00000013941,ENSOARG00000009999,ENSOARG00000015379,ENSOARG00000003586,ENSOARG00000011967,ENSOARG00000002740,ENSOARG00000004499,ENSOARG00000010358,ENSOARG00000003620,ENSOARG00000020422,ENSOARG00000012131,ENSOARG00000014623,ENSOARG00000009172,ENSOARG00000010939,ENSOARG00000016306,ENSOARG00000007840,ENSOARG00000001202,…
GO:0051246	regulation of protein metabolic process	biological_process	0.00038248	0.023183	31	179	1732	19130	7	ENSOARG00000013062,ENSOARG00000018722,ENSOARG00000007493,ENSOARG00000014525,ENSOARG00000006063,ENSOARG00000012075,ENSOARG00000012452	24	ENSOARG00000008984,ENSOARG00000008332,ENSOARG00000001680,ENSOARG00000017214,ENSOARG00000013941,ENSOARG00000009653,ENSOARG00000020138,ENSOARG00000003586,ENSOARG00000009999,ENSOARG00000020968,ENSOARG00000000994,ENSOARG00000015723,ENSOARG00000011437,ENSOARG00000020422,ENSOARG00000002811,ENSOARG00000001158,ENSOARG00000019090,ENSOARG00000004787,ENSOARG00000001202,ENSOARG00000004356,ENSOARG00000003963,…
GO:0001775	cell activation	biological_process	2.4335e-14	2.1904e-10	30	179	586	19130	1	ENSOARG00000010969	29	ENSOARG00000010358,ENSOARG00000015006,ENSOARG00000010462,ENSOARG00000005579,ENSOARG00000003586,ENSOARG00000009999,ENSOARG00000012145,ENSOARG00000020968,ENSOARG00000009401,ENSOARG00000009680,ENSOARG00000000123,ENSOARG00000013941,ENSOARG00000015970,ENSOARG00000008893,ENSOARG00000013646,ENSOARG00000008984,ENSOARG00000004964,ENSOARG00000015718,ENSOARG00000004356,ENSOARG00000006139,ENSOARG00000019090,…
GO:0042127	regulation of cell proliferation	biological_process	9.5374e-09	5.7231e-06	30	179	980	19130	10	ENSOARG00000002613,ENSOARG00000009845,ENSOARG00000012452,ENSOARG00000012075,ENSOARG00000009090,ENSOARG00000006073,ENSOARG00000018722,ENSOARG00000014525,ENSOARG00000010969,ENSOARG00000020442	20	ENSOARG00000001680,ENSOARG00000008984,ENSOARG00000013646,ENSOARG00000013941,ENSOARG00000003586,ENSOARG00000009999,ENSOARG00000002740,ENSOARG00000004499,ENSOARG00000015006,ENSOARG00000010358,ENSOARG00000002790,ENSOARG00000012131,ENSOARG00000020422,ENSOARG00000010939,ENSOARG00000004787,ENSOARG00000019090,ENSOARG00000017562,ENSOARG00000004356,ENSOARG00000015718,ENSOARG00000004964
GO:0006915	apoptotic process	biological_process	8.6441e-08	2.7788e-05	30	179	1078	19130	4	ENSOARG00000009090,ENSOARG00000010969,ENSOARG00000019395,ENSOARG00000007493	26	ENSOARG00000009999,ENSOARG00000019197,ENSOARG00000020138,ENSOARG00000011235,ENSOARG00000008127,ENSOARG00000001680,ENSOARG00000008984,ENSOARG00000008332,ENSOARG00000013941,ENSOARG00000009599,ENSOARG00000016334,ENSOARG00000000123,ENSOARG00000017214,ENSOARG00000001202,ENSOARG00000017562,ENSOARG00000004356,ENSOARG00000012948,ENSOARG00000015718,ENSOARG00000010493,ENSOARG00000004964,ENSOARG00000002790,…
GO:0012501	programmed cell death	biological_process	1.2441e-07	3.6122e-05	30	179	1096	19130	4	ENSOARG00000007493,ENSOARG00000019395,ENSOARG00000009090,ENSOARG00000010969	26	ENSOARG00000009999,ENSOARG00000020138,ENSOARG00000019197,ENSOARG00000011235,ENSOARG00000001680,ENSOARG00000008127,ENSOARG00000008332,ENSOARG00000008984,ENSOARG00000013941,ENSOARG00000016334,ENSOARG00000009599,ENSOARG00000017214,ENSOARG00000000123,ENSOARG00000004356,ENSOARG00000001202,ENSOARG00000017562,ENSOARG00000004964,ENSOARG00000012948,ENSOARG00000015718,ENSOARG00000010493,ENSOARG00000012131,…
GO:2000026	regulation of multicellular organismal development	biological_process	7.6651e-07	0.00013556	30	179	1186	19130	7	ENSOARG00000014525,ENSOARG00000002613,ENSOARG00000018722,ENSOARG00000015708,ENSOARG00000009090,ENSOARG00000019884,ENSOARG00000012075	23	ENSOARG00000014123,ENSOARG00000010358,ENSOARG00000013482,ENSOARG00000020138,ENSOARG00000015006,ENSOARG00000005579,ENSOARG00000020968,ENSOARG00000015379,ENSOARG00000014103,ENSOARG00000009680,ENSOARG00000000123,ENSOARG00000016334,ENSOARG00000006908,ENSOARG00000013941,ENSOARG00000013646,ENSOARG00000008984,ENSOARG00000001680,ENSOARG00000015718,ENSOARG00000004356,ENSOARG00000017562,ENSOARG00000004787,…
GO:0006357	regulation of transcription from RNA polymerase II promoter	biological_process	3.3439e-06	0.00046498	30	179	1280	19130	6	ENSOARG00000014525,ENSOARG00000018722,ENSOARG00000002613,ENSOARG00000003437,ENSOARG00000020376,ENSOARG00000012075	24	ENSOARG00000009675,ENSOARG00000012948,ENSOARG00000010493,ENSOARG00000001202,ENSOARG00000017562,ENSOARG00000016306,ENSOARG00000010939,ENSOARG00000007840,ENSOARG00000009172,ENSOARG00000014623,ENSOARG00000012131,ENSOARG00000020422,ENSOARG00000003620,ENSOARG00000010358,ENSOARG00000004499,ENSOARG00000009999,ENSOARG00000015379,ENSOARG00000002740,ENSOARG00000003586,ENSOARG00000011967,ENSOARG00000013941,…
GO:0032268	regulation of cellular protein metabolic process	biological_process	0.00019333	0.01349	30	179	1589	19130	7	ENSOARG00000012452,ENSOARG00000012075,ENSOARG00000014525,ENSOARG00000007493,ENSOARG00000006063,ENSOARG00000018722,ENSOARG00000013062	23	ENSOARG00000017214,ENSOARG00000013941,ENSOARG00000008984,ENSOARG00000008332,ENSOARG00000001680,ENSOARG00000000994,ENSOARG00000015723,ENSOARG00000009653,ENSOARG00000020138,ENSOARG00000009999,ENSOARG00000003586,ENSOARG00000020968,ENSOARG00000002811,ENSOARG00000001158,ENSOARG00000019090,ENSOARG00000004787,ENSOARG00000011437,ENSOARG00000020422,ENSOARG00000015718,ENSOARG00000010493,ENSOARG00000004964,…
GO:0016310	phosphorylation	biological_process	0.00022163	0.014981	30	179	1591	19130	4	ENSOARG00000012075,ENSOARG00000012452,ENSOARG00000014525,ENSOARG00000018722	26	ENSOARG00000001680,ENSOARG00000008984,ENSOARG00000008332,ENSOARG00000013646,ENSOARG00000008454,ENSOARG00000003586,ENSOARG00000009999,ENSOARG00000020968,ENSOARG00000009653,ENSOARG00000000994,ENSOARG00000015723,ENSOARG00000011235,ENSOARG00000020422,ENSOARG00000011437,ENSOARG00000004787,ENSOARG00000002811,ENSOARG00000014631,ENSOARG00000001158,ENSOARG00000019090,ENSOARG00000015215,ENSOARG00000003963,…
GO:0045321	leukocyte activation	biological_process	2.7642e-15	4.9762e-11	29	179	500	19130	1	ENSOARG00000010969	28	ENSOARG00000008984,ENSOARG00000015970,ENSOARG00000008893,ENSOARG00000013646,ENSOARG00000000123,ENSOARG00000009401,ENSOARG00000013941,ENSOARG00000010462,ENSOARG00000015006,ENSOARG00000009999,ENSOARG00000020968,ENSOARG00000003586,ENSOARG00000012145,ENSOARG00000005579,ENSOARG00000010358,ENSOARG00000011437,ENSOARG00000010445,ENSOARG00000020422,ENSOARG00000012131,ENSOARG00000009250,ENSOARG00000001158,…
GO:0071310	cellular response to organic substance	biological_process	8.2971e-07	0.00014501	29	179	1131	19130	4	ENSOARG00000009090,ENSOARG00000009845,ENSOARG00000014525,ENSOARG00000006063	25	ENSOARG00000002790,ENSOARG00000020422,ENSOARG00000010445,ENSOARG00000004787,ENSOARG00000010939,ENSOARG00000018894,ENSOARG00000014631,ENSOARG00000017562,ENSOARG00000004964,ENSOARG00000010493,ENSOARG00000001680,ENSOARG00000013941,ENSOARG00000016109,ENSOARG00000000123,ENSOARG00000017214,ENSOARG00000004499,ENSOARG00000009999,ENSOARG00000003586,ENSOARG00000018139,ENSOARG00000010462,ENSOARG00000020138,…
GO:0010628	positive regulation of gene expression	biological_process	1.2473e-05	0.0013861	29	179	1298	19130	5	ENSOARG00000003437,ENSOARG00000019884,ENSOARG00000012075,ENSOARG00000002613,ENSOARG00000018722	24	ENSOARG00000010493,ENSOARG00000009675,ENSOARG00000017562,ENSOARG00000004356,ENSOARG00000009172,ENSOARG00000010939,ENSOARG00000014623,ENSOARG00000019090,ENSOARG00000012131,ENSOARG00000020422,ENSOARG00000013482,ENSOARG00000010358,ENSOARG00000015379,ENSOARG00000002740,ENSOARG00000009999,ENSOARG00000003586,ENSOARG00000020968,ENSOARG00000011967,ENSOARG00000004499,ENSOARG00000020138,ENSOARG00000017214,…
GO:0006468	protein phosphorylation	biological_process	2.4449e-05	0.0025589	29	179	1334	19130	3	ENSOARG00000012075,ENSOARG00000012452,ENSOARG00000014525	26	ENSOARG00000001158,ENSOARG00000014631,ENSOARG00000002811,ENSOARG00000019090,ENSOARG00000004787,ENSOARG00000020422,ENSOARG00000011437,ENSOARG00000010493,ENSOARG00000015718,ENSOARG00000004964,ENSOARG00000001202,ENSOARG00000005164,ENSOARG00000015215,ENSOARG00000003963,ENSOARG00000008454,ENSOARG00000008984,ENSOARG00000008332,ENSOARG00000013646,ENSOARG00000001680,ENSOARG00000011235,ENSOARG00000000994,…
GO:0016337	single organismal cell-cell adhesion	biological_process	5.0738e-14	2.8473e-10	28	179	515	19130	3	ENSOARG00000009090,ENSOARG00000011075,ENSOARG00000010969	25	ENSOARG00000009250,ENSOARG00000020422,ENSOARG00000010445,ENSOARG00000009172,ENSOARG00000004787,ENSOARG00000010939,ENSOARG00000001158,ENSOARG00000020249,ENSOARG00000019090,ENSOARG00000005711,ENSOARG00000004356,ENSOARG00000015718,ENSOARG00000004964,ENSOARG00000008984,ENSOARG00000013646,ENSOARG00000015970,ENSOARG00000013941,ENSOARG00000000123,ENSOARG00000009401,ENSOARG00000020968,ENSOARG00000012145,…
GO:0098602	single organism cell adhesion	biological_process	3.4791e-13	8.9472e-10	28	179	556	19130	3	ENSOARG00000010969,ENSOARG00000011075,ENSOARG00000009090	25	ENSOARG00000003586,ENSOARG00000012145,ENSOARG00000020968,ENSOARG00000005579,ENSOARG00000015006,ENSOARG00000010358,ENSOARG00000008984,ENSOARG00000013646,ENSOARG00000015970,ENSOARG00000013941,ENSOARG00000000123,ENSOARG00000009401,ENSOARG00000004356,ENSOARG00000005711,ENSOARG00000015718,ENSOARG00000004964,ENSOARG00000009250,ENSOARG00000010445,ENSOARG00000020422,ENSOARG00000009172,ENSOARG00000010939,…
GO:0098609	cell-cell adhesion	biological_process	2.8712e-12	3.976e-09	28	179	603	19130	3	ENSOARG00000009090,ENSOARG00000010969,ENSOARG00000011075	25	ENSOARG00000012145,ENSOARG00000003586,ENSOARG00000020968,ENSOARG00000005579,ENSOARG00000015006,ENSOARG00000010358,ENSOARG00000008984,ENSOARG00000013646,ENSOARG00000015970,ENSOARG00000013941,ENSOARG00000000123,ENSOARG00000009401,ENSOARG00000005711,ENSOARG00000004356,ENSOARG00000015718,ENSOARG00000004964,ENSOARG00000009250,ENSOARG00000020422,ENSOARG00000010445,ENSOARG00000009172,ENSOARG00000004787,…
GO:0007155	cell adhesion	biological_process	5.3934e-08	1.9038e-05	28	179	922	19130	3	ENSOARG00000011075,ENSOARG00000010969,ENSOARG00000009090	25	ENSOARG00000009401,ENSOARG00000000123,ENSOARG00000013941,ENSOARG00000015970,ENSOARG00000013646,ENSOARG00000008984,ENSOARG00000010358,ENSOARG00000015006,ENSOARG00000005579,ENSOARG00000020968,ENSOARG00000012145,ENSOARG00000003586,ENSOARG00000020249,ENSOARG00000019090,ENSOARG00000001158,ENSOARG00000004787,ENSOARG00000010939,ENSOARG00000009172,ENSOARG00000020422,ENSOARG00000010445,ENSOARG00000009250,…
GO:0022610	biological adhesion	biological_process	6.191e-08	2.1433e-05	28	179	928	19130	3	ENSOARG00000009090,ENSOARG00000010969,ENSOARG00000011075	25	ENSOARG00000020968,ENSOARG00000012145,ENSOARG00000003586,ENSOARG00000005579,ENSOARG00000015006,ENSOARG00000010358,ENSOARG00000008984,ENSOARG00000013646,ENSOARG00000015970,ENSOARG00000013941,ENSOARG00000000123,ENSOARG00000009401,ENSOARG00000004356,ENSOARG00000005711,ENSOARG00000015718,ENSOARG00000004964,ENSOARG00000009250,ENSOARG00000010445,ENSOARG00000020422,ENSOARG00000009172,ENSOARG00000010939,…
GO:0023056	positive regulation of signaling	biological_process	2.6732e-07	6.0358e-05	28	179	1009	19130	5	ENSOARG00000014525,ENSOARG00000002613,ENSOARG00000009090,ENSOARG00000020442,ENSOARG00000012075	23	ENSOARG00000004964,ENSOARG00000010493,ENSOARG00000015718,ENSOARG00000004356,ENSOARG00000005164,ENSOARG00000017562,ENSOARG00000015215,ENSOARG00000019090,ENSOARG00000001158,ENSOARG00000020422,ENSOARG00000003620,ENSOARG00000000994,ENSOARG00000004499,ENSOARG00000003586,ENSOARG00000020968,ENSOARG00000013941,ENSOARG00000015970,ENSOARG00000008332,ENSOARG00000013646,ENSOARG00000014085,ENSOARG00000008984,…
GO:0010647	positive regulation of cell communication	biological_process	3.7362e-07	7.6814e-05	28	179	1025	19130	5	ENSOARG00000014525,ENSOARG00000002613,ENSOARG00000009090,ENSOARG00000020442,ENSOARG00000012075	23	ENSOARG00000020968,ENSOARG00000003586,ENSOARG00000004499,ENSOARG00000000994,ENSOARG00000003620,ENSOARG00000008127,ENSOARG00000001680,ENSOARG00000014085,ENSOARG00000008984,ENSOARG00000013646,ENSOARG00000015970,ENSOARG00000008332,ENSOARG00000013941,ENSOARG00000015215,ENSOARG00000005164,ENSOARG00000017562,ENSOARG00000004356,ENSOARG00000010493,ENSOARG00000015718,ENSOARG00000004964,ENSOARG00000020422,…
GO:0009887	organ morphogenesis	biological_process	7.8352e-09	4.8638e-06	27	179	783	19130	7	ENSOARG00000020442,ENSOARG00000003437,ENSOARG00000020376,ENSOARG00000012075,ENSOARG00000014525,ENSOARG00000019395,ENSOARG00000002613	20	ENSOARG00000009599,ENSOARG00000013941,ENSOARG00000006908,ENSOARG00000001680,ENSOARG00000010358,ENSOARG00000008507,ENSOARG00000009758,ENSOARG00000004499,ENSOARG00000003586,ENSOARG00000015379,ENSOARG00000009999,ENSOARG00000014623,ENSOARG00000004787,ENSOARG00000010939,ENSOARG00000016306,ENSOARG00000020422,ENSOARG00000002790,ENSOARG00000012948,ENSOARG00000005711,ENSOARG00000016319
GO:0042981	regulation of apoptotic process	biological_process	1.1964e-07	3.5308e-05	27	179	911	19130	4	ENSOARG00000009090,ENSOARG00000010969,ENSOARG00000007493,ENSOARG00000019395	23	ENSOARG00000009999,ENSOARG00000019197,ENSOARG00000020138,ENSOARG00000013941,ENSOARG00000017214,ENSOARG00000016334,ENSOARG00000000123,ENSOARG00000009599,ENSOARG00000008127,ENSOARG00000001680,ENSOARG00000008332,ENSOARG00000015718,ENSOARG00000012948,ENSOARG00000010493,ENSOARG00000004964,ENSOARG00000001202,ENSOARG00000017562,ENSOARG00000004356,ENSOARG00000010939,ENSOARG00000004787,ENSOARG00000005846,…
GO:0009967	positive regulation of signal transduction	biological_process	1.439e-07	3.8094e-05	27	179	919	19130	5	ENSOARG00000002613,ENSOARG00000014525,ENSOARG00000012075,ENSOARG00000020442,ENSOARG00000009090	22	ENSOARG00000020422,ENSOARG00000001158,ENSOARG00000019090,ENSOARG00000017562,ENSOARG00000005164,ENSOARG00000004356,ENSOARG00000015718,ENSOARG00000010493,ENSOARG00000004964,ENSOARG00000008127,ENSOARG00000001680,ENSOARG00000008984,ENSOARG00000014085,ENSOARG00000008332,ENSOARG00000015970,ENSOARG00000013646,ENSOARG00000013941,ENSOARG00000020968,ENSOARG00000003586,ENSOARG00000004499,ENSOARG00000003620,…
GO:0043067	regulation of programmed cell death	biological_process	1.49e-07	3.8875e-05	27	179	921	19130	4	ENSOARG00000019395,ENSOARG00000007493,ENSOARG00000009090,ENSOARG00000010969	23	ENSOARG00000009999,ENSOARG00000020138,ENSOARG00000019197,ENSOARG00000001680,ENSOARG00000008127,ENSOARG00000008332,ENSOARG00000013941,ENSOARG00000009599,ENSOARG00000016334,ENSOARG00000017214,ENSOARG00000000123,ENSOARG00000004356,ENSOARG00000017562,ENSOARG00000001202,ENSOARG00000004964,ENSOARG00000012948,ENSOARG00000010493,ENSOARG00000015718,ENSOARG00000012131,ENSOARG00000010939,ENSOARG00000005846,…
GO:0010941	regulation of cell death	biological_process	3.799e-07	7.6841e-05	27	179	966	19130	4	ENSOARG00000019395,ENSOARG00000007493,ENSOARG00000009090,ENSOARG00000010969	23	ENSOARG00000004964,ENSOARG00000012948,ENSOARG00000010493,ENSOARG00000015718,ENSOARG00000004356,ENSOARG00000017562,ENSOARG00000001202,ENSOARG00000019090,ENSOARG00000004787,ENSOARG00000010939,ENSOARG00000005846,ENSOARG00000012131,ENSOARG00000020138,ENSOARG00000019197,ENSOARG00000009999,ENSOARG00000016334,ENSOARG00000017214,ENSOARG00000009599,ENSOARG00000000123,ENSOARG00000013941,ENSOARG00000008332,…
GO:0010629	negative regulation of gene expression	biological_process	1.1584e-06	0.00018788	27	179	1020	19130	6	ENSOARG00000006063,ENSOARG00000018722,ENSOARG00000002613,ENSOARG00000009090,ENSOARG00000003437,ENSOARG00000020376	21	ENSOARG00000014103,ENSOARG00000013941,ENSOARG00000008984,ENSOARG00000015970,ENSOARG00000001680,ENSOARG00000010358,ENSOARG00000011235,ENSOARG00000002740,ENSOARG00000015379,ENSOARG00000009999,ENSOARG00000014623,ENSOARG00000007840,ENSOARG00000010939,ENSOARG00000004787,ENSOARG00000016306,ENSOARG00000020422,ENSOARG00000002790,ENSOARG00000010493,ENSOARG00000012948,ENSOARG00000004964,ENSOARG00000001202
GO:0031328	positive regulation of cellular biosynthetic process	biological_process	7.0282e-05	0.0059186	27	179	1283	19130	4	ENSOARG00000018722,ENSOARG00000002613,ENSOARG00000003437,ENSOARG00000012075	23	ENSOARG00000004356,ENSOARG00000017562,ENSOARG00000009675,ENSOARG00000004964,ENSOARG00000010493,ENSOARG00000020422,ENSOARG00000012131,ENSOARG00000014623,ENSOARG00000019090,ENSOARG00000010939,ENSOARG00000009172,ENSOARG00000004499,ENSOARG00000015379,ENSOARG00000009999,ENSOARG00000002740,ENSOARG00000003586,ENSOARG00000011967,ENSOARG00000010358,ENSOARG00000013482,ENSOARG00000008984,ENSOARG00000001680,…
GO:0051173	positive regulation of nitrogen compound metabolic process	biological_process	8.7689e-05	0.0071429	27	179	1299	19130	4	ENSOARG00000018722,ENSOARG00000002613,ENSOARG00000003437,ENSOARG00000012075	23	ENSOARG00000017214,ENSOARG00000016334,ENSOARG00000013941,ENSOARG00000001680,ENSOARG00000010358,ENSOARG00000013482,ENSOARG00000015379,ENSOARG00000002740,ENSOARG00000009999,ENSOARG00000011967,ENSOARG00000003586,ENSOARG00000004499,ENSOARG00000019090,ENSOARG00000014623,ENSOARG00000009172,ENSOARG00000010939,ENSOARG00000020422,ENSOARG00000012131,ENSOARG00000010493,ENSOARG00000015718,ENSOARG00000009675,…
GO:0009891	positive regulation of biosynthetic process	biological_process	9.3187e-05	0.0075227	27	179	1305	19130	4	ENSOARG00000003437,ENSOARG00000012075,ENSOARG00000002613,ENSOARG00000018722	23	ENSOARG00000004356,ENSOARG00000017562,ENSOARG00000009675,ENSOARG00000004964,ENSOARG00000010493,ENSOARG00000020422,ENSOARG00000012131,ENSOARG00000014623,ENSOARG00000019090,ENSOARG00000010939,ENSOARG00000009172,ENSOARG00000004499,ENSOARG00000003586,ENSOARG00000015379,ENSOARG00000009999,ENSOARG00000011967,ENSOARG00000002740,ENSOARG00000010358,ENSOARG00000013482,ENSOARG00000008984,ENSOARG00000001680,…
GO:0051240	positive regulation of multicellular organismal process	biological_process	1.775e-06	0.00027311	26	179	980	19130	6	ENSOARG00000012075,ENSOARG00000010969,ENSOARG00000009090,ENSOARG00000019884,ENSOARG00000002613,ENSOARG00000014525	20	ENSOARG00000020422,ENSOARG00000020249,ENSOARG00000010939,ENSOARG00000004356,ENSOARG00000017562,ENSOARG00000015718,ENSOARG00000013646,ENSOARG00000008984,ENSOARG00000001680,ENSOARG00000009401,ENSOARG00000000123,ENSOARG00000013941,ENSOARG00000006908,ENSOARG00000015006,ENSOARG00000020138,ENSOARG00000009653,ENSOARG00000015379,ENSOARG00000020968,ENSOARG00000010358,ENSOARG00000013482
GO:0031399	regulation of protein modification process	biological_process	3.8376e-05	0.0037751	26	179	1162	19130	5	ENSOARG00000014525,ENSOARG00000013062,ENSOARG00000018722,ENSOARG00000012452,ENSOARG00000012075	21	ENSOARG00000002811,ENSOARG00000001158,ENSOARG00000019090,ENSOARG00000004787,ENSOARG00000020422,ENSOARG00000011437,ENSOARG00000010493,ENSOARG00000015718,ENSOARG00000004964,ENSOARG00000003963,ENSOARG00000013941,ENSOARG00000008984,ENSOARG00000008332,ENSOARG00000001680,ENSOARG00000000994,ENSOARG00000015723,ENSOARG00000009653,ENSOARG00000020138,ENSOARG00000003586,ENSOARG00000009999,ENSOARG00000020968
GO:0010557	positive regulation of macromolecule biosynthetic process	biological_process	8.3746e-05	0.0069156	26	179	1223	19130	4	ENSOARG00000002613,ENSOARG00000018722,ENSOARG00000012075,ENSOARG00000003437	22	ENSOARG00000010493,ENSOARG00000009675,ENSOARG00000017562,ENSOARG00000004356,ENSOARG00000014623,ENSOARG00000019090,ENSOARG00000009172,ENSOARG00000010939,ENSOARG00000020422,ENSOARG00000012131,ENSOARG00000010358,ENSOARG00000013482,ENSOARG00000015379,ENSOARG00000009999,ENSOARG00000003586,ENSOARG00000011967,ENSOARG00000002740,ENSOARG00000004499,ENSOARG00000016334,ENSOARG00000017214,ENSOARG00000008984,…
GO:0045935	positive regulation of nucleobase-containing compound metabolic process	biological_process	0.00011878	0.0091378	26	179	1249	19130	4	ENSOARG00000018722,ENSOARG00000002613,ENSOARG00000012075,ENSOARG00000003437	22	ENSOARG00000015379,ENSOARG00000009999,ENSOARG00000002740,ENSOARG00000003586,ENSOARG00000011967,ENSOARG00000004499,ENSOARG00000013482,ENSOARG00000010358,ENSOARG00000001680,ENSOARG00000016334,ENSOARG00000017214,ENSOARG00000017562,ENSOARG00000004356,ENSOARG00000010493,ENSOARG00000015718,ENSOARG00000009675,ENSOARG00000012131,ENSOARG00000020422,ENSOARG00000009172,ENSOARG00000010939,ENSOARG00000014623,…
GO:0009888	tissue development	biological_process	0.00077001	0.041878	26	179	1397	19130	6	ENSOARG00000002613,ENSOARG00000018722,ENSOARG00000007493,ENSOARG00000014525,ENSOARG00000012075,ENSOARG00000009090	20	ENSOARG00000006908,ENSOARG00000013941,ENSOARG00000012074,ENSOARG00000016334,ENSOARG00000017214,ENSOARG00000009599,ENSOARG00000001680,ENSOARG00000019971,ENSOARG00000014123,ENSOARG00000010358,ENSOARG00000011235,ENSOARG00000004499,ENSOARG00000015379,ENSOARG00000009999,ENSOARG00000010939,ENSOARG00000004787,ENSOARG00000014623,ENSOARG00000020422,ENSOARG00000010493,ENSOARG00000012948
GO:0046649	lymphocyte activation	biological_process	2.6543e-13	7.9638e-10	25	179	430	19130	1	ENSOARG00000010969	24	ENSOARG00000009172,ENSOARG00000001158,ENSOARG00000019090,ENSOARG00000009250,ENSOARG00000012131,ENSOARG00000011437,ENSOARG00000010445,ENSOARG00000020422,ENSOARG00000015718,ENSOARG00000004964,ENSOARG00000006139,ENSOARG00000004356,ENSOARG00000013941,ENSOARG00000009401,ENSOARG00000008984,ENSOARG00000015970,ENSOARG00000008893,ENSOARG00000013646,ENSOARG00000010358,ENSOARG00000020968,ENSOARG00000012145,…
GO:1902531	regulation of intracellular signal transduction	biological_process	1.9266e-05	0.0020402	25	179	1043	19130	4	ENSOARG00000014525,ENSOARG00000012075,ENSOARG00000020442,ENSOARG00000009090	21	ENSOARG00000001680,ENSOARG00000008984,ENSOARG00000013646,ENSOARG00000015970,ENSOARG00000008332,ENSOARG00000013941,ENSOARG00000003586,ENSOARG00000020968,ENSOARG00000009653,ENSOARG00000000994,ENSOARG00000020422,ENSOARG00000011437,ENSOARG00000004787,ENSOARG00000019090,ENSOARG00000003963,ENSOARG00000005164,ENSOARG00000017562,ENSOARG00000004356,ENSOARG00000015718,ENSOARG00000010493,ENSOARG00000004964
GO:0045893	positive regulation of transcription, DNA-templated	biological_process	4.2506e-05	0.0040919	25	179	1103	19130	4	ENSOARG00000003437,ENSOARG00000012075,ENSOARG00000018722,ENSOARG00000002613	21	ENSOARG00000001680,ENSOARG00000017214,ENSOARG00000016334,ENSOARG00000004499,ENSOARG00000015379,ENSOARG00000009999,ENSOARG00000011967,ENSOARG00000003586,ENSOARG00000002740,ENSOARG00000010358,ENSOARG00000013482,ENSOARG00000020422,ENSOARG00000012131,ENSOARG00000019090,ENSOARG00000014623,ENSOARG00000010939,ENSOARG00000009172,ENSOARG00000004356,ENSOARG00000017562,ENSOARG00000009675,ENSOARG00000010493
GO:1903508	positive regulation of nucleic acid-templated transcription	biological_process	4.2506e-05	0.0040919	25	179	1103	19130	4	ENSOARG00000002613,ENSOARG00000018722,ENSOARG00000003437,ENSOARG00000012075	21	ENSOARG00000013482,ENSOARG00000010358,ENSOARG00000004499,ENSOARG00000009999,ENSOARG00000015379,ENSOARG00000011967,ENSOARG00000002740,ENSOARG00000003586,ENSOARG00000017214,ENSOARG00000016334,ENSOARG00000001680,ENSOARG00000009675,ENSOARG00000010493,ENSOARG00000004356,ENSOARG00000017562,ENSOARG00000010939,ENSOARG00000009172,ENSOARG00000019090,ENSOARG00000014623,ENSOARG00000012131,ENSOARG00000020422
GO:1902680	positive regulation of RNA biosynthetic process	biological_process	4.3828e-05	0.0041745	25	179	1105	19130	4	ENSOARG00000003437,ENSOARG00000012075,ENSOARG00000018722,ENSOARG00000002613	21	ENSOARG00000014623,ENSOARG00000019090,ENSOARG00000009172,ENSOARG00000010939,ENSOARG00000020422,ENSOARG00000012131,ENSOARG00000010493,ENSOARG00000009675,ENSOARG00000017562,ENSOARG00000004356,ENSOARG00000017214,ENSOARG00000016334,ENSOARG00000001680,ENSOARG00000010358,ENSOARG00000013482,ENSOARG00000015379,ENSOARG00000011967,ENSOARG00000009999,ENSOARG00000002740,ENSOARG00000003586,ENSOARG00000004499
GO:0051254	positive regulation of RNA metabolic process	biological_process	6.9929e-05	0.0059186	25	179	1137	19130	4	ENSOARG00000012075,ENSOARG00000003437,ENSOARG00000018722,ENSOARG00000002613	21	ENSOARG00000010493,ENSOARG00000009675,ENSOARG00000017562,ENSOARG00000004356,ENSOARG00000009172,ENSOARG00000010939,ENSOARG00000014623,ENSOARG00000019090,ENSOARG00000012131,ENSOARG00000020422,ENSOARG00000013482,ENSOARG00000010358,ENSOARG00000015379,ENSOARG00000003586,ENSOARG00000009999,ENSOARG00000011967,ENSOARG00000002740,ENSOARG00000004499,ENSOARG00000017214,ENSOARG00000016334,ENSOARG00000001680
GO:0002682	regulation of immune system process	biological_process	5.3989e-07	0.00010339	24	179	808	19130	2	ENSOARG00000011075,ENSOARG00000010969	22	ENSOARG00000011437,ENSOARG00000020422,ENSOARG00000012131,ENSOARG00000019090,ENSOARG00000001158,ENSOARG00000004787,ENSOARG00000010939,ENSOARG00000004356,ENSOARG00000017562,ENSOARG00000015215,ENSOARG00000004964,ENSOARG00000015718,ENSOARG00000013646,ENSOARG00000014085,ENSOARG00000008984,ENSOARG00000009401,ENSOARG00000009680,ENSOARG00000013941,ENSOARG00000015006,ENSOARG00000020968,ENSOARG00000012145,…
GO:0045595	regulation of cell differentiation	biological_process	6.8027e-05	0.0058768	24	179	1064	19130	6	ENSOARG00000014525,ENSOARG00000015708,ENSOARG00000018722,ENSOARG00000002613,ENSOARG00000019884,ENSOARG00000012075	18	ENSOARG00000013646,ENSOARG00000001680,ENSOARG00000009680,ENSOARG00000014103,ENSOARG00000013941,ENSOARG00000015006,ENSOARG00000020138,ENSOARG00000002740,ENSOARG00000015379,ENSOARG00000020968,ENSOARG00000011235,ENSOARG00000010358,ENSOARG00000014123,ENSOARG00000020422,ENSOARG00000012131,ENSOARG00000004787,ENSOARG00000004356,ENSOARG00000015718
GO:0019220	regulation of phosphate metabolic process	biological_process	0.0001433	0.01066	24	179	1119	19130	4	ENSOARG00000018722,ENSOARG00000014525,ENSOARG00000012075,ENSOARG00000012452	20	ENSOARG00000001680,ENSOARG00000008984,ENSOARG00000008332,ENSOARG00000020968,ENSOARG00000009999,ENSOARG00000003586,ENSOARG00000009653,ENSOARG00000000994,ENSOARG00000015723,ENSOARG00000020422,ENSOARG00000011437,ENSOARG00000004787,ENSOARG00000002811,ENSOARG00000001158,ENSOARG00000019090,ENSOARG00000003963,ENSOARG00000017562,ENSOARG00000015718,ENSOARG00000010493,ENSOARG00000004964
GO:0051174	regulation of phosphorus metabolic process	biological_process	0.00015297	0.011149	24	179	1124	19130	4	ENSOARG00000014525,ENSOARG00000018722,ENSOARG00000012075,ENSOARG00000012452	20	ENSOARG00000009653,ENSOARG00000009999,ENSOARG00000020968,ENSOARG00000003586,ENSOARG00000000994,ENSOARG00000015723,ENSOARG00000008984,ENSOARG00000008332,ENSOARG00000001680,ENSOARG00000017562,ENSOARG00000003963,ENSOARG00000015718,ENSOARG00000010493,ENSOARG00000004964,ENSOARG00000020422,ENSOARG00000011437,ENSOARG00000001158,ENSOARG00000002811,ENSOARG00000019090,ENSOARG00000004787
GO:0007159	leukocyte cell-cell adhesion	biological_process	6.3267e-14	2.8473e-10	23	179	332	19130	2	ENSOARG00000011075,ENSOARG00000010969	21	ENSOARG00000015006,ENSOARG00000005579,ENSOARG00000020968,ENSOARG00000003586,ENSOARG00000012145,ENSOARG00000010358,ENSOARG00000013646,ENSOARG00000015970,ENSOARG00000008984,ENSOARG00000009401,ENSOARG00000013941,ENSOARG00000004356,ENSOARG00000004964,ENSOARG00000015718,ENSOARG00000010445,ENSOARG00000020422,ENSOARG00000009250,ENSOARG00000019090,ENSOARG00000001158,ENSOARG00000010939,ENSOARG00000009172
GO:0006955	immune response	biological_process	3.7152e-07	7.6814e-05	23	179	735	19130	0		23	ENSOARG00000010939,ENSOARG00000001158,ENSOARG00000019090,ENSOARG00000015718,ENSOARG00000004964,ENSOARG00000015215,ENSOARG00000006139,ENSOARG00000009042,ENSOARG00000004356,ENSOARG00000013941,ENSOARG00000009551,ENSOARG00000000123,ENSOARG00000017249,ENSOARG00000009401,ENSOARG00000001701,ENSOARG00000014085,ENSOARG00000008984,ENSOARG00000013646,ENSOARG00000012145,ENSOARG00000020968,ENSOARG00000005579,…
GO:0051094	positive regulation of developmental process	biological_process	3.3837e-06	0.00046498	23	179	825	19130	6	ENSOARG00000014525,ENSOARG00000002613,ENSOARG00000009090,ENSOARG00000019884,ENSOARG00000012075,ENSOARG00000010969	17	ENSOARG00000013482,ENSOARG00000010358,ENSOARG00000002740,ENSOARG00000020968,ENSOARG00000015379,ENSOARG00000015006,ENSOARG00000020138,ENSOARG00000013941,ENSOARG00000006908,ENSOARG00000000123,ENSOARG00000014103,ENSOARG00000001680,ENSOARG00000008984,ENSOARG00000013646,ENSOARG00000015718,ENSOARG00000017562,ENSOARG00000020422
GO:0009790	embryo development	biological_process	1.0076e-05	0.0011408	23	179	863	19130	5	ENSOARG00000014525,ENSOARG00000019395,ENSOARG00000002613,ENSOARG00000012075,ENSOARG00000020376	18	ENSOARG00000016319,ENSOARG00000016296,ENSOARG00000009675,ENSOARG00000020422,ENSOARG00000010939,ENSOARG00000004787,ENSOARG00000016331,ENSOARG00000004499,ENSOARG00000015379,ENSOARG00000009758,ENSOARG00000010358,ENSOARG00000002307,ENSOARG00000001680,ENSOARG00000013941,ENSOARG00000006908,ENSOARG00000014103,ENSOARG00000009680,ENSOARG00000009599
GO:0042325	regulation of phosphorylation	biological_process	3.2369e-05	0.0032736	23	179	950	19130	4	ENSOARG00000012075,ENSOARG00000012452,ENSOARG00000014525,ENSOARG00000018722	19	ENSOARG00000000994,ENSOARG00000015723,ENSOARG00000009653,ENSOARG00000020968,ENSOARG00000009999,ENSOARG00000003586,ENSOARG00000008984,ENSOARG00000008332,ENSOARG00000001680,ENSOARG00000010493,ENSOARG00000015718,ENSOARG00000004964,ENSOARG00000003963,ENSOARG00000001158,ENSOARG00000002811,ENSOARG00000019090,ENSOARG00000004787,ENSOARG00000011437,ENSOARG00000020422
GO:0010558	negative regulation of macromolecule biosynthetic process	biological_process	3.9306e-05	0.0038248	23	179	962	19130	6	ENSOARG00000020376,ENSOARG00000003437,ENSOARG00000009090,ENSOARG00000002613,ENSOARG00000018722,ENSOARG00000006063	17	ENSOARG00000013941,ENSOARG00000001680,ENSOARG00000015970,ENSOARG00000011235,ENSOARG00000010358,ENSOARG00000002740,ENSOARG00000009999,ENSOARG00000015379,ENSOARG00000007840,ENSOARG00000010939,ENSOARG00000016306,ENSOARG00000014623,ENSOARG00000020422,ENSOARG00000010493,ENSOARG00000012948,ENSOARG00000004964,ENSOARG00000001202
GO:0031327	negative regulation of cellular biosynthetic process	biological_process	7.0129e-05	0.0059186	23	179	1000	19130	6	ENSOARG00000018722,ENSOARG00000002613,ENSOARG00000006063,ENSOARG00000020376,ENSOARG00000009090,ENSOARG00000003437	17	ENSOARG00000013941,ENSOARG00000001680,ENSOARG00000015970,ENSOARG00000011235,ENSOARG00000010358,ENSOARG00000015379,ENSOARG00000009999,ENSOARG00000002740,ENSOARG00000010939,ENSOARG00000007840,ENSOARG00000016306,ENSOARG00000014623,ENSOARG00000020422,ENSOARG00000012948,ENSOARG00000010493,ENSOARG00000004964,ENSOARG00000001202
GO:0009890	negative regulation of biosynthetic process	biological_process	7.8935e-05	0.0065787	23	179	1008	19130	6	ENSOARG00000006063,ENSOARG00000018722,ENSOARG00000002613,ENSOARG00000003437,ENSOARG00000009090,ENSOARG00000020376	17	ENSOARG00000014623,ENSOARG00000007840,ENSOARG00000016306,ENSOARG00000010939,ENSOARG00000020422,ENSOARG00000012948,ENSOARG00000010493,ENSOARG00000004964,ENSOARG00000001202,ENSOARG00000013941,ENSOARG00000015970,ENSOARG00000001680,ENSOARG00000010358,ENSOARG00000011235,ENSOARG00000002740,ENSOARG00000009999,ENSOARG00000015379
GO:0051172	negative regulation of nitrogen compound metabolic process	biological_process	9.4794e-05	0.0076182	23	179	1020	19130	6	ENSOARG00000020376,ENSOARG00000009090,ENSOARG00000003437,ENSOARG00000018722,ENSOARG00000002613,ENSOARG00000006063	17	ENSOARG00000020422,ENSOARG00000007840,ENSOARG00000016306,ENSOARG00000010939,ENSOARG00000014623,ENSOARG00000001202,ENSOARG00000012948,ENSOARG00000010493,ENSOARG00000004964,ENSOARG00000001680,ENSOARG00000015970,ENSOARG00000013941,ENSOARG00000002740,ENSOARG00000015379,ENSOARG00000009999,ENSOARG00000010358,ENSOARG00000011235
GO:0070486	leukocyte aggregation	biological_process	1.3849e-13	4.9862e-10	22	179	310	19130	1	ENSOARG00000010969	21	ENSOARG00000004356,ENSOARG00000004964,ENSOARG00000015718,ENSOARG00000010445,ENSOARG00000020422,ENSOARG00000009250,ENSOARG00000019090,ENSOARG00000001158,ENSOARG00000010939,ENSOARG00000009172,ENSOARG00000015006,ENSOARG00000005579,ENSOARG00000020968,ENSOARG00000012145,ENSOARG00000003586,ENSOARG00000010358,ENSOARG00000013646,ENSOARG00000015970,ENSOARG00000008984,ENSOARG00000009401,ENSOARG00000013941
GO:0034109	homotypic cell-cell adhesion	biological_process	3.6648e-12	4.7124e-09	22	179	364	19130	1	ENSOARG00000010969	21	ENSOARG00000010358,ENSOARG00000015006,ENSOARG00000012145,ENSOARG00000003586,ENSOARG00000020968,ENSOARG00000005579,ENSOARG00000009401,ENSOARG00000013941,ENSOARG00000008984,ENSOARG00000015970,ENSOARG00000013646,ENSOARG00000015718,ENSOARG00000004964,ENSOARG00000004356,ENSOARG00000001158,ENSOARG00000019090,ENSOARG00000009172,ENSOARG00000010939,ENSOARG00000020422,ENSOARG00000010445,ENSOARG00000009250
GO:1902679	negative regulation of RNA biosynthetic process	biological_process	1.8481e-05	0.0019687	22	179	853	19130	5	ENSOARG00000003437,ENSOARG00000009090,ENSOARG00000020376,ENSOARG00000002613,ENSOARG00000018722	17	ENSOARG00000001202,ENSOARG00000004964,ENSOARG00000012948,ENSOARG00000010493,ENSOARG00000020422,ENSOARG00000014623,ENSOARG00000016306,ENSOARG00000007840,ENSOARG00000010939,ENSOARG00000009999,ENSOARG00000002740,ENSOARG00000015379,ENSOARG00000010358,ENSOARG00000011235,ENSOARG00000015970,ENSOARG00000001680,ENSOARG00000013941
GO:0001932	regulation of protein phosphorylation	biological_process	2.7197e-05	0.0028249	22	179	874	19130	3	ENSOARG00000012075,ENSOARG00000012452,ENSOARG00000014525	19	ENSOARG00000015723,ENSOARG00000000994,ENSOARG00000009999,ENSOARG00000003586,ENSOARG00000020968,ENSOARG00000009653,ENSOARG00000001680,ENSOARG00000008332,ENSOARG00000008984,ENSOARG00000004964,ENSOARG00000010493,ENSOARG00000015718,ENSOARG00000003963,ENSOARG00000004787,ENSOARG00000019090,ENSOARG00000001158,ENSOARG00000002811,ENSOARG00000020422,ENSOARG00000011437
GO:0051253	negative regulation of RNA metabolic process	biological_process	2.8667e-05	0.0029156	22	179	878	19130	5	ENSOARG00000002613,ENSOARG00000018722,ENSOARG00000020376,ENSOARG00000009090,ENSOARG00000003437	17	ENSOARG00000014623,ENSOARG00000010939,ENSOARG00000016306,ENSOARG00000007840,ENSOARG00000020422,ENSOARG00000010493,ENSOARG00000012948,ENSOARG00000004964,ENSOARG00000001202,ENSOARG00000013941,ENSOARG00000015970,ENSOARG00000001680,ENSOARG00000011235,ENSOARG00000010358,ENSOARG00000009999,ENSOARG00000002740,ENSOARG00000015379
GO:2000113	negative regulation of cellular macromolecule biosynthetic process	biological_process	6.3654e-05	0.0056233	22	179	925	19130	6	ENSOARG00000003437,ENSOARG00000009090,ENSOARG00000020376,ENSOARG00000006063,ENSOARG00000018722,ENSOARG00000002613	16	ENSOARG00000020422,ENSOARG00000014623,ENSOARG00000007840,ENSOARG00000010939,ENSOARG00000016306,ENSOARG00000001202,ENSOARG00000012948,ENSOARG00000010493,ENSOARG00000015970,ENSOARG00000001680,ENSOARG00000013941,ENSOARG00000009999,ENSOARG00000002740,ENSOARG00000015379,ENSOARG00000011235,ENSOARG00000010358
GO:0045934	negative regulation of nucleobase-containing compound metabolic process	biological_process	0.0001016	0.0081293	22	179	956	19130	5	ENSOARG00000002613,ENSOARG00000018722,ENSOARG00000020376,ENSOARG00000009090,ENSOARG00000003437	17	ENSOARG00000020422,ENSOARG00000007840,ENSOARG00000010939,ENSOARG00000016306,ENSOARG00000014623,ENSOARG00000001202,ENSOARG00000004964,ENSOARG00000010493,ENSOARG00000012948,ENSOARG00000001680,ENSOARG00000015970,ENSOARG00000013941,ENSOARG00000009999,ENSOARG00000002740,ENSOARG00000015379,ENSOARG00000010358,ENSOARG00000011235
GO:0042110	T cell activation	biological_process	8.0925e-13	1.4175e-09	21	179	303	19130	1	ENSOARG00000010969	20	ENSOARG00000010445,ENSOARG00000020422,ENSOARG00000009250,ENSOARG00000001158,ENSOARG00000019090,ENSOARG00000009172,ENSOARG00000004356,ENSOARG00000015718,ENSOARG00000004964,ENSOARG00000008984,ENSOARG00000013646,ENSOARG00000015970,ENSOARG00000009401,ENSOARG00000013941,ENSOARG00000015006,ENSOARG00000020968,ENSOARG00000003586,ENSOARG00000012145,ENSOARG00000005579,ENSOARG00000010358
GO:0070489	T cell aggregation	biological_process	8.0925e-13	1.4175e-09	21	179	303	19130	1	ENSOARG00000010969	20	ENSOARG00000010358,ENSOARG00000015006,ENSOARG00000003586,ENSOARG00000012145,ENSOARG00000020968,ENSOARG00000005579,ENSOARG00000009401,ENSOARG00000013941,ENSOARG00000008984,ENSOARG00000015970,ENSOARG00000013646,ENSOARG00000015718,ENSOARG00000004964,ENSOARG00000004356,ENSOARG00000001158,ENSOARG00000019090,ENSOARG00000009172,ENSOARG00000020422,ENSOARG00000010445,ENSOARG00000009250
GO:0071593	lymphocyte aggregation	biological_process	8.6616e-13	1.4175e-09	21	179	304	19130	1	ENSOARG00000010969	20	ENSOARG00000019090,ENSOARG00000001158,ENSOARG00000009172,ENSOARG00000010445,ENSOARG00000020422,ENSOARG00000009250,ENSOARG00000004964,ENSOARG00000015718,ENSOARG00000004356,ENSOARG00000009401,ENSOARG00000013941,ENSOARG00000015970,ENSOARG00000013646,ENSOARG00000008984,ENSOARG00000010358,ENSOARG00000015006,ENSOARG00000005579,ENSOARG00000003586,ENSOARG00000012145,ENSOARG00000020968
GO:0008284	positive regulation of cell proliferation	biological_process	3.453e-08	1.3814e-05	21	179	539	19130	6	ENSOARG00000012075,ENSOARG00000010969,ENSOARG00000006073,ENSOARG00000002613,ENSOARG00000018722,ENSOARG00000009845	15	ENSOARG00000015718,ENSOARG00000004964,ENSOARG00000010358,ENSOARG00000017562,ENSOARG00000015006,ENSOARG00000004356,ENSOARG00000009999,ENSOARG00000002740,ENSOARG00000003586,ENSOARG00000004499,ENSOARG00000010939,ENSOARG00000020422,ENSOARG00000008984,ENSOARG00000013646,ENSOARG00000001680
GO:0048534	hematopoietic or lymphoid organ development	biological_process	3.9809e-07	7.9626e-05	21	179	617	19130	0		21	ENSOARG00000009401,ENSOARG00000009680,ENSOARG00000006908,ENSOARG00000013941,ENSOARG00000013646,ENSOARG00000008984,ENSOARG00000001680,ENSOARG00000010358,ENSOARG00000016290,ENSOARG00000003620,ENSOARG00000015006,ENSOARG00000005579,ENSOARG00000009999,ENSOARG00000020968,ENSOARG00000019090,ENSOARG00000014623,ENSOARG00000009172,ENSOARG00000020422,ENSOARG00000012131,ENSOARG00000015718,ENSOARG00000004356
GO:0002520	immune system development	biological_process	1.0075e-06	0.00016794	21	179	653	19130	0		21	ENSOARG00000015006,ENSOARG00000009999,ENSOARG00000020968,ENSOARG00000005579,ENSOARG00000010358,ENSOARG00000003620,ENSOARG00000016290,ENSOARG00000008984,ENSOARG00000013646,ENSOARG00000001680,ENSOARG00000009680,ENSOARG00000009401,ENSOARG00000006908,ENSOARG00000013941,ENSOARG00000004356,ENSOARG00000015718,ENSOARG00000020422,ENSOARG00000012131,ENSOARG00000019090,ENSOARG00000014623,ENSOARG00000009172
GO:0045892	negative regulation of transcription, DNA-templated	biological_process	3.8625e-05	0.0037789	21	179	830	19130	5	ENSOARG00000020376,ENSOARG00000009090,ENSOARG00000003437,ENSOARG00000018722,ENSOARG00000002613	16	ENSOARG00000002740,ENSOARG00000009999,ENSOARG00000015379,ENSOARG00000011235,ENSOARG00000010358,ENSOARG00000001680,ENSOARG00000015970,ENSOARG00000013941,ENSOARG00000001202,ENSOARG00000012948,ENSOARG00000010493,ENSOARG00000020422,ENSOARG00000007840,ENSOARG00000010939,ENSOARG00000016306,ENSOARG00000014623
GO:1903507	negative regulation of nucleic acid-templated transcription	biological_process	4.8365e-05	0.0045585	21	179	843	19130	5	ENSOARG00000020376,ENSOARG00000003437,ENSOARG00000009090,ENSOARG00000018722,ENSOARG00000002613	16	ENSOARG00000012948,ENSOARG00000010493,ENSOARG00000001202,ENSOARG00000014623,ENSOARG00000010939,ENSOARG00000007840,ENSOARG00000016306,ENSOARG00000020422,ENSOARG00000011235,ENSOARG00000010358,ENSOARG00000015379,ENSOARG00000009999,ENSOARG00000002740,ENSOARG00000013941,ENSOARG00000015970,ENSOARG00000001680
GO:0001501	skeletal system development	biological_process	9.2627e-10	8.7762e-07	20	179	387	19130	5	ENSOARG00000002613,ENSOARG00000018722,ENSOARG00000019395,ENSOARG00000020376,ENSOARG00000003437	15	ENSOARG00000016319,ENSOARG00000004499,ENSOARG00000016296,ENSOARG00000015379,ENSOARG00000005711,ENSOARG00000009758,ENSOARG00000010358,ENSOARG00000009675,ENSOARG00000008507,ENSOARG00000002307,ENSOARG00000001680,ENSOARG00000006908,ENSOARG00000016306,ENSOARG00000016331,ENSOARG00000009680
GO:0030097	hemopoiesis	biological_process	6.5029e-07	0.00012169	20	179	581	19130	0		20	ENSOARG00000009999,ENSOARG00000020968,ENSOARG00000005579,ENSOARG00000015006,ENSOARG00000003620,ENSOARG00000016290,ENSOARG00000010358,ENSOARG00000001680,ENSOARG00000008984,ENSOARG00000013646,ENSOARG00000006908,ENSOARG00000013941,ENSOARG00000009680,ENSOARG00000009401,ENSOARG00000004356,ENSOARG00000015718,ENSOARG00000012131,ENSOARG00000020422,ENSOARG00000009172,ENSOARG00000019090
GO:0048598	embryonic morphogenesis	biological_process	4.7647e-07	9.3232e-05	19	179	510	19130	5	ENSOARG00000002613,ENSOARG00000014525,ENSOARG00000019395,ENSOARG00000012075,ENSOARG00000020376	14	ENSOARG00000015379,ENSOARG00000004499,ENSOARG00000016319,ENSOARG00000009758,ENSOARG00000009675,ENSOARG00000010358,ENSOARG00000001680,ENSOARG00000020422,ENSOARG00000016331,ENSOARG00000006908,ENSOARG00000013941,ENSOARG00000010939,ENSOARG00000009680,ENSOARG00000009599
GO:0045944	positive regulation of transcription from RNA polymerase II promoter	biological_process	0.00014024	0.010475	19	179	777	19130	3	ENSOARG00000002613,ENSOARG00000003437,ENSOARG00000012075	16	ENSOARG00000016334,ENSOARG00000001680,ENSOARG00000010358,ENSOARG00000002740,ENSOARG00000011967,ENSOARG00000003586,ENSOARG00000015379,ENSOARG00000004499,ENSOARG00000014623,ENSOARG00000009172,ENSOARG00000010939,ENSOARG00000020422,ENSOARG00000012131,ENSOARG00000010493,ENSOARG00000009675,ENSOARG00000017562
GO:1902533	positive regulation of intracellular signal transduction	biological_process	1.6496e-05	0.0017677	18	179	603	19130	4	ENSOARG00000014525,ENSOARG00000009090,ENSOARG00000020442,ENSOARG00000012075	14	ENSOARG00000008332,ENSOARG00000013646,ENSOARG00000008984,ENSOARG00000020422,ENSOARG00000013941,ENSOARG00000019090,ENSOARG00000003586,ENSOARG00000020968,ENSOARG00000004356,ENSOARG00000005164,ENSOARG00000017562,ENSOARG00000000994,ENSOARG00000004964,ENSOARG00000015718
GO:0072358	cardiovascular system development	biological_process	0.00011804	0.0091204	18	179	686	19130	3	ENSOARG00000002613,ENSOARG00000020442,ENSOARG00000009090	15	ENSOARG00000017562,ENSOARG00000009999,ENSOARG00000005579,ENSOARG00000012948,ENSOARG00000014123,ENSOARG00000011235,ENSOARG00000019971,ENSOARG00000020422,ENSOARG00000001680,ENSOARG00000016334,ENSOARG00000000123,ENSOARG00000014623,ENSOARG00000012074,ENSOARG00000004787,ENSOARG00000013941
GO:0072359	circulatory system development	biological_process	0.00011804	0.0091204	18	179	686	19130	3	ENSOARG00000009090,ENSOARG00000020442,ENSOARG00000002613	15	ENSOARG00000019971,ENSOARG00000012948,ENSOARG00000014123,ENSOARG00000011235,ENSOARG00000009999,ENSOARG00000005579,ENSOARG00000017562,ENSOARG00000012074,ENSOARG00000004787,ENSOARG00000013941,ENSOARG00000000123,ENSOARG00000016334,ENSOARG00000014623,ENSOARG00000001680,ENSOARG00000020422
GO:0009719	response to endogenous stimulus	biological_process	0.00033541	0.02092	18	179	760	19130	2	ENSOARG00000014525,ENSOARG00000006063	16	ENSOARG00000009999,ENSOARG00000003586,ENSOARG00000018139,ENSOARG00000004499,ENSOARG00000020138,ENSOARG00000003620,ENSOARG00000010358,ENSOARG00000001680,ENSOARG00000013941,ENSOARG00000017214,ENSOARG00000012948,ENSOARG00000004964,ENSOARG00000002790,ENSOARG00000020422,ENSOARG00000004787,ENSOARG00000010939
GO:0000122	negative regulation of transcription from RNA polymerase II promoter	biological_process	1.3636e-05	0.0014968	17	179	536	19130	4	ENSOARG00000018722,ENSOARG00000002613,ENSOARG00000020376,ENSOARG00000003437	13	ENSOARG00000014623,ENSOARG00000007840,ENSOARG00000010939,ENSOARG00000016306,ENSOARG00000013941,ENSOARG00000020422,ENSOARG00000015970,ENSOARG00000012948,ENSOARG00000010493,ENSOARG00000001202,ENSOARG00000015379,ENSOARG00000009999,ENSOARG00000002740
GO:0071495	cellular response to endogenous stimulus	biological_process	0.00012487	0.0094845	17	179	637	19130	2	ENSOARG00000006063,ENSOARG00000014525	15	ENSOARG00000001680,ENSOARG00000002790,ENSOARG00000020422,ENSOARG00000013941,ENSOARG00000004787,ENSOARG00000010939,ENSOARG00000017214,ENSOARG00000004499,ENSOARG00000018139,ENSOARG00000009999,ENSOARG00000003586,ENSOARG00000020138,ENSOARG00000003620,ENSOARG00000010358,ENSOARG00000004964
GO:0002694	regulation of leukocyte activation	biological_process	2.2924e-08	1.0753e-05	16	179	301	19130	1	ENSOARG00000010969	15	ENSOARG00000004964,ENSOARG00000015718,ENSOARG00000020968,ENSOARG00000003586,ENSOARG00000004356,ENSOARG00000015006,ENSOARG00000013941,ENSOARG00000010939,ENSOARG00000019090,ENSOARG00000001158,ENSOARG00000012131,ENSOARG00000013646,ENSOARG00000011437,ENSOARG00000008984,ENSOARG00000020422
GO:0050865	regulation of cell activation	biological_process	6.4279e-08	2.1833e-05	16	179	324	19130	1	ENSOARG00000010969	15	ENSOARG00000013941,ENSOARG00000010939,ENSOARG00000019090,ENSOARG00000001158,ENSOARG00000012131,ENSOARG00000013646,ENSOARG00000008984,ENSOARG00000011437,ENSOARG00000020422,ENSOARG00000004964,ENSOARG00000015718,ENSOARG00000020968,ENSOARG00000003586,ENSOARG00000015006,ENSOARG00000004356
GO:0030155	regulation of cell adhesion	biological_process	6.5693e-06	0.00077803	16	179	452	19130	2	ENSOARG00000010969,ENSOARG00000009090	14	ENSOARG00000004964,ENSOARG00000015718,ENSOARG00000020968,ENSOARG00000003586,ENSOARG00000015006,ENSOARG00000004356,ENSOARG00000013941,ENSOARG00000010939,ENSOARG00000019090,ENSOARG00000000123,ENSOARG00000001158,ENSOARG00000013646,ENSOARG00000008984,ENSOARG00000020422
GO:0043066	negative regulation of apoptotic process	biological_process	8.5965e-05	0.0070664	16	179	561	19130	2	ENSOARG00000007493,ENSOARG00000010969	14	ENSOARG00000010939,ENSOARG00000013941,ENSOARG00000000123,ENSOARG00000017214,ENSOARG00000016334,ENSOARG00000001680,ENSOARG00000008332,ENSOARG00000004964,ENSOARG00000012948,ENSOARG00000009999,ENSOARG00000020138,ENSOARG00000001202,ENSOARG00000017562,ENSOARG00000019197
GO:0045597	positive regulation of cell differentiation	biological_process	9.2946e-05	0.0075227	16	179	563	19130	4	ENSOARG00000002613,ENSOARG00000014525,ENSOARG00000012075,ENSOARG00000019884	12	ENSOARG00000001680,ENSOARG00000020422,ENSOARG00000013646,ENSOARG00000013941,ENSOARG00000014103,ENSOARG00000015379,ENSOARG00000002740,ENSOARG00000020968,ENSOARG00000020138,ENSOARG00000015006,ENSOARG00000015718,ENSOARG00000010358
GO:0043069	negative regulation of programmed cell death	biological_process	0.0001101	0.008731	16	179	573	19130	2	ENSOARG00000007493,ENSOARG00000010969	14	ENSOARG00000012948,ENSOARG00000004964,ENSOARG00000001202,ENSOARG00000017562,ENSOARG00000019197,ENSOARG00000020138,ENSOARG00000009999,ENSOARG00000000123,ENSOARG00000016334,ENSOARG00000017214,ENSOARG00000010939,ENSOARG00000013941,ENSOARG00000008332,ENSOARG00000001680
GO:0043009	chordate embryonic development	biological_process	0.0001359	0.010236	16	179	570	19130	4	ENSOARG00000020376,ENSOARG00000014525,ENSOARG00000019395,ENSOARG00000002613	12	ENSOARG00000009680,ENSOARG00000013941,ENSOARG00000006908,ENSOARG00000004787,ENSOARG00000020422,ENSOARG00000001680,ENSOARG00000010358,ENSOARG00000002307,ENSOARG00000009758,ENSOARG00000016319,ENSOARG00000015379,ENSOARG00000016296
GO:0009792	embryo development ending in birth or egg hatching	biological_process	0.00014966	0.011042	16	179	575	19130	4	ENSOARG00000002613,ENSOARG00000019395,ENSOARG00000014525,ENSOARG00000020376	12	ENSOARG00000015379,ENSOARG00000016296,ENSOARG00000016319,ENSOARG00000002307,ENSOARG00000010358,ENSOARG00000009758,ENSOARG00000020422,ENSOARG00000001680,ENSOARG00000009680,ENSOARG00000006908,ENSOARG00000013941,ENSOARG00000004787
GO:0060548	negative regulation of cell death	biological_process	0.00019928	0.013798	16	179	604	19130	2	ENSOARG00000007493,ENSOARG00000010969	14	ENSOARG00000020138,ENSOARG00000001202,ENSOARG00000017562,ENSOARG00000019197,ENSOARG00000009999,ENSOARG00000004964,ENSOARG00000012948,ENSOARG00000008332,ENSOARG00000001680,ENSOARG00000016334,ENSOARG00000000123,ENSOARG00000017214,ENSOARG00000013941,ENSOARG00000010939
GO:0051249	regulation of lymphocyte activation	biological_process	2.1061e-08	1.0753e-05	15	179	259	19130	1	ENSOARG00000010969	14	ENSOARG00000015718,ENSOARG00000004964,ENSOARG00000015006,ENSOARG00000004356,ENSOARG00000003586,ENSOARG00000020968,ENSOARG00000001158,ENSOARG00000019090,ENSOARG00000013941,ENSOARG00000008984,ENSOARG00000011437,ENSOARG00000020422,ENSOARG00000013646,ENSOARG00000012131
GO:0022407	regulation of cell-cell adhesion	biological_process	2.739e-08	1.2026e-05	15	179	264	19130	1	ENSOARG00000010969	14	ENSOARG00000013646,ENSOARG00000020422,ENSOARG00000008984,ENSOARG00000013941,ENSOARG00000010939,ENSOARG00000019090,ENSOARG00000000123,ENSOARG00000001158,ENSOARG00000020968,ENSOARG00000003586,ENSOARG00000004356,ENSOARG00000015006,ENSOARG00000004964,ENSOARG00000015718
GO:0034097	response to cytokine	biological_process	7.2095e-07	0.00013243	15	179	338	19130	3	ENSOARG00000018722,ENSOARG00000009845,ENSOARG00000011075	12	ENSOARG00000016109,ENSOARG00000004787,ENSOARG00000013941,ENSOARG00000000123,ENSOARG00000014631,ENSOARG00000018894,ENSOARG00000002790,ENSOARG00000010445,ENSOARG00000004964,ENSOARG00000019197,ENSOARG00000017562,ENSOARG00000010462
GO:0002684	positive regulation of immune system process	biological_process	6.1487e-05	0.0055345	15	179	493	19130	2	ENSOARG00000011075,ENSOARG00000010969	13	ENSOARG00000004964,ENSOARG00000015718,ENSOARG00000015215,ENSOARG00000003586,ENSOARG00000020968,ENSOARG00000015006,ENSOARG00000004356,ENSOARG00000010939,ENSOARG00000013941,ENSOARG00000013646,ENSOARG00000014085,ENSOARG00000008984,ENSOARG00000020422
GO:1903037	regulation of leukocyte cell-cell adhesion	biological_process	3.1692e-09	2.4141e-06	14	179	192	19130	1	ENSOARG00000010969	13	ENSOARG00000004964,ENSOARG00000015718,ENSOARG00000015006,ENSOARG00000004356,ENSOARG00000020968,ENSOARG00000003586,ENSOARG00000019090,ENSOARG00000001158,ENSOARG00000013941,ENSOARG00000010939,ENSOARG00000013646,ENSOARG00000020422,ENSOARG00000008984
GO:0034110	regulation of homotypic cell-cell adhesion	biological_process	5.833e-09	3.7502e-06	14	179	201	19130	1	ENSOARG00000010969	13	ENSOARG00000015718,ENSOARG00000004964,ENSOARG00000015006,ENSOARG00000004356,ENSOARG00000003586,ENSOARG00000020968,ENSOARG00000001158,ENSOARG00000019090,ENSOARG00000010939,ENSOARG00000013941,ENSOARG00000008984,ENSOARG00000020422,ENSOARG00000013646
GO:0002521	leukocyte differentiation	biological_process	6.0209e-06	0.00073733	14	179	351	19130	0		14	ENSOARG00000010358,ENSOARG00000015718,ENSOARG00000004356,ENSOARG00000015006,ENSOARG00000005579,ENSOARG00000020968,ENSOARG00000009999,ENSOARG00000009401,ENSOARG00000019090,ENSOARG00000013941,ENSOARG00000009172,ENSOARG00000013646,ENSOARG00000008984,ENSOARG00000012131
GO:0007389	pattern specification process	biological_process	1.219e-05	0.0013631	14	179	370	19130	3	ENSOARG00000019395,ENSOARG00000014525,ENSOARG00000012075	11	ENSOARG00000016319,ENSOARG00000015379,ENSOARG00000016296,ENSOARG00000009758,ENSOARG00000009675,ENSOARG00000001680,ENSOARG00000020422,ENSOARG00000006908,ENSOARG00000016306,ENSOARG00000016331,ENSOARG00000009680
GO:0040012	regulation of locomotion	biological_process	0.00056157	0.03221	14	179	530	19130	3	ENSOARG00000009090,ENSOARG00000012452,ENSOARG00000011075	11	ENSOARG00000004964,ENSOARG00000013187,ENSOARG00000010462,ENSOARG00000017562,ENSOARG00000005579,ENSOARG00000012145,ENSOARG00000019090,ENSOARG00000009401,ENSOARG00000004787,ENSOARG00000013941,ENSOARG00000001680
GO:0051270	regulation of cellular component movement	biological_process	0.00064553	0.036315	14	179	536	19130	3	ENSOARG00000011075,ENSOARG00000012452,ENSOARG00000009090	11	ENSOARG00000019971,ENSOARG00000004964,ENSOARG00000013187,ENSOARG00000005579,ENSOARG00000012145,ENSOARG00000017562,ENSOARG00000004787,ENSOARG00000013941,ENSOARG00000009401,ENSOARG00000019090,ENSOARG00000001680
GO:0022409	positive regulation of cell-cell adhesion	biological_process	1.3559e-09	1.1095e-06	13	179	148	19130	1	ENSOARG00000010969	12	ENSOARG00000004356,ENSOARG00000015006,ENSOARG00000020968,ENSOARG00000003586,ENSOARG00000004964,ENSOARG00000015718,ENSOARG00000013646,ENSOARG00000020422,ENSOARG00000008984,ENSOARG00000000123,ENSOARG00000010939,ENSOARG00000013941
GO:0050863	regulation of T cell activation	biological_process	1.8439e-08	9.7627e-06	13	179	185	19130	1	ENSOARG00000010969	12	ENSOARG00000013941,ENSOARG00000019090,ENSOARG00000001158,ENSOARG00000013646,ENSOARG00000008984,ENSOARG00000020422,ENSOARG00000004964,ENSOARG00000015718,ENSOARG00000020968,ENSOARG00000003586,ENSOARG00000004356,ENSOARG00000015006
GO:0046651	lymphocyte proliferation	biological_process	2.2293e-08	1.0753e-05	13	179	187	19130	1	ENSOARG00000010969	12	ENSOARG00000004964,ENSOARG00000015718,ENSOARG00000003586,ENSOARG00000004356,ENSOARG00000015006,ENSOARG00000019090,ENSOARG00000012131,ENSOARG00000009250,ENSOARG00000013646,ENSOARG00000010445,ENSOARG00000008984,ENSOARG00000020422
GO:0032943	mononuclear cell proliferation	biological_process	2.374e-08	1.0753e-05	13	179	188	19130	1	ENSOARG00000010969	12	ENSOARG00000015006,ENSOARG00000004356,ENSOARG00000003586,ENSOARG00000004964,ENSOARG00000015718,ENSOARG00000013646,ENSOARG00000008984,ENSOARG00000010445,ENSOARG00000020422,ENSOARG00000009250,ENSOARG00000012131,ENSOARG00000019090
GO:0070661	leukocyte proliferation	biological_process	3.2104e-08	1.344e-05	13	179	193	19130	1	ENSOARG00000010969	12	ENSOARG00000019090,ENSOARG00000009250,ENSOARG00000012131,ENSOARG00000008984,ENSOARG00000020422,ENSOARG00000010445,ENSOARG00000013646,ENSOARG00000015718,ENSOARG00000004964,ENSOARG00000003586,ENSOARG00000004356,ENSOARG00000015006
GO:0048705	skeletal system morphogenesis	biological_process	4.9235e-08	1.7727e-05	13	179	196	19130	3	ENSOARG00000020376,ENSOARG00000019395,ENSOARG00000002613	10	ENSOARG00000009758,ENSOARG00000008507,ENSOARG00000010358,ENSOARG00000004499,ENSOARG00000016319,ENSOARG00000015379,ENSOARG00000005711,ENSOARG00000006908,ENSOARG00000016306,ENSOARG00000001680
GO:0030098	lymphocyte differentiation	biological_process	3.7549e-07	7.6814e-05	13	179	236	19130	0		13	ENSOARG00000015718,ENSOARG00000010358,ENSOARG00000015006,ENSOARG00000004356,ENSOARG00000020968,ENSOARG00000005579,ENSOARG00000019090,ENSOARG00000009401,ENSOARG00000009172,ENSOARG00000013941,ENSOARG00000008984,ENSOARG00000013646,ENSOARG00000012131
GO:0048562	embryonic organ morphogenesis	biological_process	9.4462e-07	0.00015893	13	179	252	19130	3	ENSOARG00000019395,ENSOARG00000002613,ENSOARG00000020376	10	ENSOARG00000010358,ENSOARG00000009758,ENSOARG00000016319,ENSOARG00000004499,ENSOARG00000015379,ENSOARG00000009599,ENSOARG00000013941,ENSOARG00000006908,ENSOARG00000010939,ENSOARG00000020422
GO:0045785	positive regulation of cell adhesion	biological_process	1.1005e-06	0.00018011	13	179	259	19130	1	ENSOARG00000010969	12	ENSOARG00000000123,ENSOARG00000010939,ENSOARG00000013941,ENSOARG00000020422,ENSOARG00000008984,ENSOARG00000013646,ENSOARG00000015718,ENSOARG00000004964,ENSOARG00000015006,ENSOARG00000004356,ENSOARG00000003586,ENSOARG00000020968
GO:0071345	cellular response to cytokine stimulus	biological_process	3.9961e-06	0.00052129	13	179	293	19130	1	ENSOARG00000009845	12	ENSOARG00000002790,ENSOARG00000010445,ENSOARG00000013941,ENSOARG00000004787,ENSOARG00000016109,ENSOARG00000018894,ENSOARG00000000123,ENSOARG00000014631,ENSOARG00000010462,ENSOARG00000017562,ENSOARG00000019197,ENSOARG00000004964
GO:0003002	regionalization	biological_process	6.5432e-06	0.00077803	13	179	303	19130	2	ENSOARG00000014525,ENSOARG00000012075	11	ENSOARG00000016319,ENSOARG00000016296,ENSOARG00000015379,ENSOARG00000009675,ENSOARG00000009758,ENSOARG00000020422,ENSOARG00000001680,ENSOARG00000009680,ENSOARG00000016306,ENSOARG00000006908,ENSOARG00000016331
GO:0048568	embryonic organ development	biological_process	5.8335e-05	0.0053307	13	179	370	19130	3	ENSOARG00000002613,ENSOARG00000019395,ENSOARG00000020376	10	ENSOARG00000004499,ENSOARG00000016319,ENSOARG00000015379,ENSOARG00000010358,ENSOARG00000009758,ENSOARG00000020422,ENSOARG00000009599,ENSOARG00000006908,ENSOARG00000010939,ENSOARG00000013941
GO:2000145	regulation of cell motility	biological_process	0.00067417	0.037343	13	179	478	19130	3	ENSOARG00000009090,ENSOARG00000012452,ENSOARG00000011075	10	ENSOARG00000004964,ENSOARG00000013187,ENSOARG00000017562,ENSOARG00000005579,ENSOARG00000012145,ENSOARG00000019090,ENSOARG00000009401,ENSOARG00000004787,ENSOARG00000013941,ENSOARG00000001680
GO:1903039	positive regulation of leukocyte cell-cell adhesion	biological_process	1.209e-09	1.0882e-06	12	179	120	19130	1	ENSOARG00000010969	11	ENSOARG00000015718,ENSOARG00000004964,ENSOARG00000015006,ENSOARG00000004356,ENSOARG00000003586,ENSOARG00000020968,ENSOARG00000010939,ENSOARG00000013941,ENSOARG00000020422,ENSOARG00000008984,ENSOARG00000013646
GO:0034112	positive regulation of homotypic cell-cell adhesion	biological_process	1.3293e-09	1.1095e-06	12	179	121	19130	1	ENSOARG00000010969	11	ENSOARG00000010939,ENSOARG00000013941,ENSOARG00000008984,ENSOARG00000020422,ENSOARG00000013646,ENSOARG00000015718,ENSOARG00000004964,ENSOARG00000015006,ENSOARG00000004356,ENSOARG00000020968,ENSOARG00000003586
GO:0042098	T cell proliferation	biological_process	4.967e-09	3.3117e-06	12	179	135	19130	1	ENSOARG00000010969	11	ENSOARG00000015718,ENSOARG00000004964,ENSOARG00000015006,ENSOARG00000004356,ENSOARG00000003586,ENSOARG00000019090,ENSOARG00000020422,ENSOARG00000008984,ENSOARG00000010445,ENSOARG00000013646,ENSOARG00000009250
GO:0030217	T cell differentiation	biological_process	7.1271e-08	2.3328e-05	12	179	170	19130	0		12	ENSOARG00000020968,ENSOARG00000005579,ENSOARG00000015006,ENSOARG00000004356,ENSOARG00000015718,ENSOARG00000010358,ENSOARG00000008984,ENSOARG00000013646,ENSOARG00000009172,ENSOARG00000013941,ENSOARG00000019090,ENSOARG00000009401
GO:0002696	positive regulation of leukocyte activation	biological_process	1.3898e-07	3.7832e-05	12	179	182	19130	1	ENSOARG00000010969	11	ENSOARG00000008984,ENSOARG00000020422,ENSOARG00000013646,ENSOARG00000013941,ENSOARG00000010939,ENSOARG00000015006,ENSOARG00000004356,ENSOARG00000003586,ENSOARG00000020968,ENSOARG00000015718,ENSOARG00000004964
GO:0050867	positive regulation of cell activation	biological_process	1.9958e-07	4.9216e-05	12	179	188	19130	1	ENSOARG00000010969	11	ENSOARG00000008984,ENSOARG00000020422,ENSOARG00000013646,ENSOARG00000013941,ENSOARG00000010939,ENSOARG00000015006,ENSOARG00000004356,ENSOARG00000003586,ENSOARG00000020968,ENSOARG00000015718,ENSOARG00000004964
GO:0009952	anterior/posterior pattern specification	biological_process	2.6823e-07	6.0358e-05	12	179	190	19130	1	ENSOARG00000012075	11	ENSOARG00000001680,ENSOARG00000020422,ENSOARG00000016306,ENSOARG00000006908,ENSOARG00000016331,ENSOARG00000009680,ENSOARG00000016319,ENSOARG00000016296,ENSOARG00000015379,ENSOARG00000009758,ENSOARG00000009675
GO:0019221	cytokine-mediated signaling pathway	biological_process	3.4558e-07	7.5868e-05	12	179	198	19130	1	ENSOARG00000009845	11	ENSOARG00000018894,ENSOARG00000014631,ENSOARG00000000123,ENSOARG00000004787,ENSOARG00000016109,ENSOARG00000010445,ENSOARG00000002790,ENSOARG00000004964,ENSOARG00000010462,ENSOARG00000019197,ENSOARG00000017562
GO:0043065	positive regulation of apoptotic process	biological_process	0.00016458	0.011899	12	179	362	19130	1	ENSOARG00000009090	11	ENSOARG00000017214,ENSOARG00000009599,ENSOARG00000019090,ENSOARG00000004787,ENSOARG00000010939,ENSOARG00000008127,ENSOARG00000001680,ENSOARG00000015718,ENSOARG00000010493,ENSOARG00000004964,ENSOARG00000017562
GO:0043068	positive regulation of programmed cell death	biological_process	0.00017879	0.012671	12	179	365	19130	1	ENSOARG00000009090	11	ENSOARG00000010493,ENSOARG00000015718,ENSOARG00000004964,ENSOARG00000017562,ENSOARG00000010939,ENSOARG00000004787,ENSOARG00000017214,ENSOARG00000009599,ENSOARG00000019090,ENSOARG00000008127,ENSOARG00000001680
GO:0010942	positive regulation of cell death	biological_process	0.00022303	0.014981	12	179	374	19130	1	ENSOARG00000009090	11	ENSOARG00000004787,ENSOARG00000010939,ENSOARG00000019090,ENSOARG00000017214,ENSOARG00000009599,ENSOARG00000001680,ENSOARG00000008127,ENSOARG00000004964,ENSOARG00000015718,ENSOARG00000010493,ENSOARG00000017562
GO:0050776	regulation of immune response	biological_process	0.00023947	0.015908	12	179	379	19130	0		12	ENSOARG00000014085,ENSOARG00000008984,ENSOARG00000013646,ENSOARG00000010939,ENSOARG00000013941,ENSOARG00000019090,ENSOARG00000012145,ENSOARG00000015215,ENSOARG00000020968,ENSOARG00000004356,ENSOARG00000015006,ENSOARG00000015718
GO:0008285	negative regulation of cell proliferation	biological_process	0.00065537	0.036754	12	179	422	19130	5	ENSOARG00000018722,ENSOARG00000014525,ENSOARG00000012452,ENSOARG00000009090,ENSOARG00000020442	7	ENSOARG00000013941,ENSOARG00000004787,ENSOARG00000020422,ENSOARG00000017562,ENSOARG00000002790,ENSOARG00000009999,ENSOARG00000001680
GO:0001816	cytokine production	biological_process	0.0007507	0.040952	12	179	429	19130	2	ENSOARG00000009090,ENSOARG00000010969	10	ENSOARG00000015006,ENSOARG00000004356,ENSOARG00000017562,ENSOARG00000020249,ENSOARG00000009401,ENSOARG00000019090,ENSOARG00000000123,ENSOARG00000010939,ENSOARG00000013941,ENSOARG00000008984
GO:0050870	positive regulation of T cell activation	biological_process	1.2761e-08	7.1788e-06	11	179	118	19130	1	ENSOARG00000010969	10	ENSOARG00000015718,ENSOARG00000004964,ENSOARG00000003586,ENSOARG00000020968,ENSOARG00000015006,ENSOARG00000004356,ENSOARG00000013941,ENSOARG00000020422,ENSOARG00000008984,ENSOARG00000013646
GO:0048706	embryonic skeletal system development	biological_process	1.4024e-08	7.6503e-06	11	179	117	19130	3	ENSOARG00000020376,ENSOARG00000002613,ENSOARG00000019395	8	ENSOARG00000009680,ENSOARG00000006908,ENSOARG00000002307,ENSOARG00000010358,ENSOARG00000009758,ENSOARG00000016296,ENSOARG00000015379,ENSOARG00000016319
GO:0050670	regulation of lymphocyte proliferation	biological_process	1.0449e-07	3.2433e-05	11	179	144	19130	1	ENSOARG00000010969	10	ENSOARG00000012131,ENSOARG00000013646,ENSOARG00000008984,ENSOARG00000020422,ENSOARG00000019090,ENSOARG00000003586,ENSOARG00000004356,ENSOARG00000015006,ENSOARG00000004964,ENSOARG00000015718
GO:0032944	regulation of mononuclear cell proliferation	biological_process	1.121e-07	3.3632e-05	11	179	145	19130	1	ENSOARG00000010969	10	ENSOARG00000015718,ENSOARG00000004964,ENSOARG00000003586,ENSOARG00000004356,ENSOARG00000015006,ENSOARG00000019090,ENSOARG00000012131,ENSOARG00000008984,ENSOARG00000020422,ENSOARG00000013646
GO:0070663	regulation of leukocyte proliferation	biological_process	1.2838e-07	3.6683e-05	11	179	147	19130	1	ENSOARG00000010969	10	ENSOARG00000019090,ENSOARG00000012131,ENSOARG00000013646,ENSOARG00000008984,ENSOARG00000020422,ENSOARG00000004964,ENSOARG00000015718,ENSOARG00000003586,ENSOARG00000004356,ENSOARG00000015006
GO:0051251	positive regulation of lymphocyte activation	biological_process	3.7466e-07	7.6814e-05	11	179	163	19130	1	ENSOARG00000010969	10	ENSOARG00000013941,ENSOARG00000020422,ENSOARG00000008984,ENSOARG00000013646,ENSOARG00000015718,ENSOARG00000004964,ENSOARG00000015006,ENSOARG00000004356,ENSOARG00000003586,ENSOARG00000020968
GO:0035239	tube morphogenesis	biological_process	0.00029544	0.018793	11	179	324	19130	2	ENSOARG00000014525,ENSOARG00000002613	9	ENSOARG00000004787,ENSOARG00000010939,ENSOARG00000006908,ENSOARG00000013941,ENSOARG00000012074,ENSOARG00000014623,ENSOARG00000001680,ENSOARG00000020422,ENSOARG00000015379
GO:0048608	reproductive structure development	biological_process	0.00030322	0.01922	11	179	326	19130	2	ENSOARG00000007493,ENSOARG00000014525	9	ENSOARG00000009675,ENSOARG00000016334,ENSOARG00000009680,ENSOARG00000014623,ENSOARG00000004787,ENSOARG00000013941,ENSOARG00000020422,ENSOARG00000002790,ENSOARG00000001680
GO:0061458	reproductive system development	biological_process	0.00033584	0.02092	11	179	330	19130	2	ENSOARG00000007493,ENSOARG00000014525	9	ENSOARG00000002790,ENSOARG00000001680,ENSOARG00000020422,ENSOARG00000004787,ENSOARG00000013941,ENSOARG00000016334,ENSOARG00000009680,ENSOARG00000014623,ENSOARG00000009675
GO:0048514	blood vessel morphogenesis	biological_process	0.00066808	0.037297	11	179	359	19130	1	ENSOARG00000009090	10	ENSOARG00000014623,ENSOARG00000000123,ENSOARG00000016334,ENSOARG00000004787,ENSOARG00000012074,ENSOARG00000020422,ENSOARG00000001680,ENSOARG00000017562,ENSOARG00000005579,ENSOARG00000009999
GO:0001817	regulation of cytokine production	biological_process	0.00088216	0.046462	11	179	378	19130	2	ENSOARG00000009090,ENSOARG00000010969	9	ENSOARG00000008984,ENSOARG00000000123,ENSOARG00000009401,ENSOARG00000019090,ENSOARG00000020249,ENSOARG00000013941,ENSOARG00000010939,ENSOARG00000015006,ENSOARG00000004356
GO:0042129	regulation of T cell proliferation	biological_process	7.1191e-08	2.3328e-05	10	179	109	19130	1	ENSOARG00000010969	9	ENSOARG00000019090,ENSOARG00000013646,ENSOARG00000008984,ENSOARG00000020422,ENSOARG00000004964,ENSOARG00000015718,ENSOARG00000015006,ENSOARG00000004356,ENSOARG00000003586
GO:0019932	second-messenger-mediated signaling	biological_process	6.5572e-07	0.00012169	10	179	135	19130	2	ENSOARG00000006063,ENSOARG00000018722	8	ENSOARG00000019971,ENSOARG00000010462,ENSOARG00000017562,ENSOARG00000009653,ENSOARG00000001158,ENSOARG00000013646,ENSOARG00000015970,ENSOARG00000008984
GO:0048736	appendage development	biological_process	2.6279e-06	0.00037845	10	179	155	19130	3	ENSOARG00000019395,ENSOARG00000002613,ENSOARG00000003437	7	ENSOARG00000001680,ENSOARG00000004499,ENSOARG00000015379,ENSOARG00000016331,ENSOARG00000010358,ENSOARG00000009675,ENSOARG00000009680
GO:0060173	limb development	biological_process	2.6279e-06	0.00037845	10	179	155	19130	3	ENSOARG00000002613,ENSOARG00000019395,ENSOARG00000003437	7	ENSOARG00000016331,ENSOARG00000009680,ENSOARG00000010358,ENSOARG00000009675,ENSOARG00000015379,ENSOARG00000004499,ENSOARG00000001680
GO:0007548	sex differentiation	biological_process	8.7997e-06	0.001009	10	179	179	19130	2	ENSOARG00000014525,ENSOARG00000007493	8	ENSOARG00000009675,ENSOARG00000013941,ENSOARG00000004787,ENSOARG00000016334,ENSOARG00000009680,ENSOARG00000014623,ENSOARG00000002790,ENSOARG00000001680
GO:0014706	striated muscle tissue development	biological_process	0.00022223	0.014981	10	179	263	19130	3	ENSOARG00000002613,ENSOARG00000018722,ENSOARG00000012075	7	ENSOARG00000017214,ENSOARG00000012948,ENSOARG00000010493,ENSOARG00000014123,ENSOARG00000014623,ENSOARG00000011235,ENSOARG00000019971
GO:0001503	ossification	biological_process	0.00034365	0.021332	10	179	278	19130	2	ENSOARG00000018722,ENSOARG00000002613	8	ENSOARG00000001680,ENSOARG00000014103,ENSOARG00000009401,ENSOARG00000005711,ENSOARG00000004499,ENSOARG00000010358,ENSOARG00000008507,ENSOARG00000012948
GO:0060537	muscle tissue development	biological_process	0.0003698	0.022643	10	179	280	19130	3	ENSOARG00000018722,ENSOARG00000002613,ENSOARG00000012075	7	ENSOARG00000014123,ENSOARG00000014623,ENSOARG00000011235,ENSOARG00000012948,ENSOARG00000010493,ENSOARG00000017214,ENSOARG00000019971
GO:0042326	negative regulation of phosphorylation	biological_process	0.00042978	0.025704	10	179	290	19130	2	ENSOARG00000012452,ENSOARG00000018722	8	ENSOARG00000011437,ENSOARG00000001680,ENSOARG00000004787,ENSOARG00000009653,ENSOARG00000009999,ENSOARG00000003963,ENSOARG00000015718,ENSOARG00000010493
GO:0097285	cell-type specific apoptotic process	biological_process	0.00071517	0.039372	10	179	309	19130	1	ENSOARG00000010969	9	ENSOARG00000004964,ENSOARG00000009999,ENSOARG00000020138,ENSOARG00000013941,ENSOARG00000010939,ENSOARG00000019090,ENSOARG00000016334,ENSOARG00000001680,ENSOARG00000008332
GO:0042102	positive regulation of T cell proliferation	biological_process	1.2366e-08	7.1788e-06	9	179	68	19130	1	ENSOARG00000010969	8	ENSOARG00000013646,ENSOARG00000020422,ENSOARG00000008984,ENSOARG00000004964,ENSOARG00000015718,ENSOARG00000003586,ENSOARG00000004356,ENSOARG00000015006
GO:0050671	positive regulation of lymphocyte proliferation	biological_process	1.7704e-07	4.5529e-05	9	179	92	19130	1	ENSOARG00000010969	8	ENSOARG00000004964,ENSOARG00000015718,ENSOARG00000003586,ENSOARG00000015006,ENSOARG00000004356,ENSOARG00000013646,ENSOARG00000020422,ENSOARG00000008984
GO:0032946	positive regulation of mononuclear cell proliferation	biological_process	1.9442e-07	4.8612e-05	9	179	93	19130	1	ENSOARG00000010969	8	ENSOARG00000013646,ENSOARG00000020422,ENSOARG00000008984,ENSOARG00000004964,ENSOARG00000015718,ENSOARG00000015006,ENSOARG00000004356,ENSOARG00000003586
GO:0070665	positive regulation of leukocyte proliferation	biological_process	2.547e-07	5.8784e-05	9	179	96	19130	1	ENSOARG00000010969	8	ENSOARG00000015006,ENSOARG00000004356,ENSOARG00000003586,ENSOARG00000015718,ENSOARG00000004964,ENSOARG00000020422,ENSOARG00000008984,ENSOARG00000013646
GO:0030326	embryonic limb morphogenesis	biological_process	1.5496e-06	0.00024257	9	179	114	19130	2	ENSOARG00000002613,ENSOARG00000019395	7	ENSOARG00000015379,ENSOARG00000001680,ENSOARG00000004499,ENSOARG00000009680,ENSOARG00000010358,ENSOARG00000009675,ENSOARG00000016331
GO:0035113	embryonic appendage morphogenesis	biological_process	1.5496e-06	0.00024257	9	179	114	19130	2	ENSOARG00000019395,ENSOARG00000002613	7	ENSOARG00000009675,ENSOARG00000010358,ENSOARG00000009680,ENSOARG00000016331,ENSOARG00000004499,ENSOARG00000001680,ENSOARG00000015379
GO:0035107	appendage morphogenesis	biological_process	6.513e-06	0.00077803	9	179	135	19130	2	ENSOARG00000019395,ENSOARG00000002613	7	ENSOARG00000015379,ENSOARG00000004499,ENSOARG00000001680,ENSOARG00000016331,ENSOARG00000009680,ENSOARG00000010358,ENSOARG00000009675
GO:0035108	limb morphogenesis	biological_process	6.513e-06	0.00077803	9	179	135	19130	2	ENSOARG00000002613,ENSOARG00000019395	7	ENSOARG00000015379,ENSOARG00000001680,ENSOARG00000004499,ENSOARG00000016331,ENSOARG00000009680,ENSOARG00000010358,ENSOARG00000009675
GO:1903706	regulation of hemopoiesis	biological_process	0.00044687	0.026638	9	179	240	19130	0		9	ENSOARG00000012131,ENSOARG00000013646,ENSOARG00000020422,ENSOARG00000013941,ENSOARG00000009680,ENSOARG00000020968,ENSOARG00000015006,ENSOARG00000004356,ENSOARG00000015718
GO:0001819	positive regulation of cytokine production	biological_process	0.00067127	0.037297	9	179	255	19130	1	ENSOARG00000009090	8	ENSOARG00000020249,ENSOARG00000009401,ENSOARG00000000123,ENSOARG00000013941,ENSOARG00000010939,ENSOARG00000008984,ENSOARG00000015006,ENSOARG00000004356
GO:0001933	negative regulation of protein phosphorylation	biological_process	0.00090798	0.047654	9	179	264	19130	1	ENSOARG00000012452	8	ENSOARG00000004787,ENSOARG00000001680,ENSOARG00000011437,ENSOARG00000010493,ENSOARG00000015718,ENSOARG00000009999,ENSOARG00000003963,ENSOARG00000009653
GO:0048704	embryonic skeletal system morphogenesis	biological_process	1.6471e-06	0.00025561	8	179	87	19130	3	ENSOARG00000019395,ENSOARG00000002613,ENSOARG00000020376	5	ENSOARG00000015379,ENSOARG00000016319,ENSOARG00000009758,ENSOARG00000006908,ENSOARG00000010358
GO:0008406	gonad development	biological_process	5.8239e-05	0.0053307	8	179	140	19130	1	ENSOARG00000014525	7	ENSOARG00000001680,ENSOARG00000002790,ENSOARG00000013941,ENSOARG00000004787,ENSOARG00000009675,ENSOARG00000016334,ENSOARG00000009680
GO:0045137	development of primary sexual characteristics	biological_process	6.4874e-05	0.0056969	8	179	142	19130	1	ENSOARG00000014525	7	ENSOARG00000016334,ENSOARG00000009680,ENSOARG00000009675,ENSOARG00000013941,ENSOARG00000004787,ENSOARG00000002790,ENSOARG00000001680
GO:0001649	osteoblast differentiation	biological_process	0.00014678	0.010873	8	179	160	19130	2	ENSOARG00000018722,ENSOARG00000002613	6	ENSOARG00000012948,ENSOARG00000008507,ENSOARG00000010358,ENSOARG00000014103,ENSOARG00000004499,ENSOARG00000001680
GO:0050900	leukocyte migration	biological_process	0.00034935	0.021612	8	179	185	19130	1	ENSOARG00000011075	7	ENSOARG00000017562,ENSOARG00000013941,ENSOARG00000004787,ENSOARG00000009401,ENSOARG00000004964,ENSOARG00000019090,ENSOARG00000000123
GO:0097191	extrinsic apoptotic signaling pathway	biological_process	0.00041284	0.024856	8	179	187	19130	0		8	ENSOARG00000015718,ENSOARG00000010493,ENSOARG00000020138,ENSOARG00000005846,ENSOARG00000000123,ENSOARG00000001680,ENSOARG00000008127,ENSOARG00000008332
GO:0001763	morphogenesis of a branching structure	biological_process	0.00050347	0.029567	8	179	191	19130	2	ENSOARG00000014525,ENSOARG00000002613	6	ENSOARG00000001680,ENSOARG00000005711,ENSOARG00000004787,ENSOARG00000006908,ENSOARG00000012074,ENSOARG00000014623
GO:0050678	regulation of epithelial cell proliferation	biological_process	0.00079322	0.043011	8	179	208	19130	1	ENSOARG00000014525	7	ENSOARG00000009999,ENSOARG00000004499,ENSOARG00000001680,ENSOARG00000017562,ENSOARG00000010939,ENSOARG00000013941,ENSOARG00000004964
GO:0033077	T cell differentiation in thymus	biological_process	3.8225e-06	0.00050849	7	179	69	19130	0		7	ENSOARG00000013646,ENSOARG00000004356,ENSOARG00000008984,ENSOARG00000019090,ENSOARG00000015718,ENSOARG00000013941,ENSOARG00000009172
GO:0071594	thymocyte aggregation	biological_process	3.8225e-06	0.00050849	7	179	69	19130	0		7	ENSOARG00000013646,ENSOARG00000004356,ENSOARG00000008984,ENSOARG00000013941,ENSOARG00000009172,ENSOARG00000019090,ENSOARG00000015718
GO:0046631	alpha-beta T cell activation	biological_process	1.5411e-05	0.0016712	7	179	86	19130	0		7	ENSOARG00000013941,ENSOARG00000015718,ENSOARG00000009401,ENSOARG00000005579,ENSOARG00000008984,ENSOARG00000015006,ENSOARG00000013646
GO:0019722	calcium-mediated signaling	biological_process	2.7975e-05	0.0028614	7	179	92	19130	1	ENSOARG00000018722	6	ENSOARG00000015970,ENSOARG00000010462,ENSOARG00000013646,ENSOARG00000008984,ENSOARG00000001158,ENSOARG00000019971
GO:0002429	immune response-activating cell surface receptor signaling pathway	biological_process	4.4918e-05	0.0042558	7	179	101	19130	0		7	ENSOARG00000020968,ENSOARG00000015215,ENSOARG00000013646,ENSOARG00000008984,ENSOARG00000013941,ENSOARG00000010939,ENSOARG00000015718
GO:0045619	regulation of lymphocyte differentiation	biological_process	6.0548e-05	0.0054774	7	179	106	19130	0		7	ENSOARG00000015718,ENSOARG00000013941,ENSOARG00000013646,ENSOARG00000015006,ENSOARG00000004356,ENSOARG00000012131,ENSOARG00000020968
GO:0046661	male sex differentiation	biological_process	6.1881e-05	0.0055422	7	179	105	19130	2	ENSOARG00000014525,ENSOARG00000007493	5	ENSOARG00000013941,ENSOARG00000016334,ENSOARG00000009680,ENSOARG00000009675,ENSOARG00000001680
GO:0002768	immune response-regulating cell surface receptor signaling pathway	biological_process	8.2019e-05	0.0068042	7	179	111	19130	0		7	ENSOARG00000015718,ENSOARG00000010939,ENSOARG00000013941,ENSOARG00000013646,ENSOARG00000008984,ENSOARG00000020968,ENSOARG00000015215
GO:2000146	negative regulation of cell motility	biological_process	0.00069383	0.038314	7	179	156	19130	2	ENSOARG00000012452,ENSOARG00000009090	5	ENSOARG00000009401,ENSOARG00000004787,ENSOARG00000013941,ENSOARG00000012145,ENSOARG00000001680
GO:0060348	bone development	biological_process	0.00080469	0.043371	7	179	155	19130	2	ENSOARG00000002613,ENSOARG00000003437	5	ENSOARG00000005711,ENSOARG00000004499,ENSOARG00000001680,ENSOARG00000008507,ENSOARG00000010358
GO:0045444	fat cell differentiation	biological_process	0.00095089	0.049617	7	179	165	19130	0		7	ENSOARG00000013941,ENSOARG00000010939,ENSOARG00000017214,ENSOARG00000014103,ENSOARG00000001680,ENSOARG00000009653,ENSOARG00000020422
GO:0051271	negative regulation of cellular component movement	biological_process	0.0010513	0.053764	7	179	167	19130	2	ENSOARG00000012452,ENSOARG00000009090	5	ENSOARG00000001680,ENSOARG00000012145,ENSOARG00000004787,ENSOARG00000013941,ENSOARG00000009401
GO:0045061	thymic T cell selection	biological_process	3.9321e-08	1.5388e-05	6	179	22	19130	0		6	ENSOARG00000009172,ENSOARG00000013941,ENSOARG00000015718,ENSOARG00000008984,ENSOARG00000013646,ENSOARG00000004356
GO:0045058	T cell selection	biological_process	9.0798e-07	0.00015567	6	179	36	19130	0		6	ENSOARG00000015718,ENSOARG00000009172,ENSOARG00000013941,ENSOARG00000008984,ENSOARG00000004356,ENSOARG00000013646
GO:0045580	regulation of T cell differentiation	biological_process	0.00011664	0.0091064	6	179	82	19130	0		6	ENSOARG00000020968,ENSOARG00000013646,ENSOARG00000015006,ENSOARG00000004356,ENSOARG00000013941,ENSOARG00000015718
GO:0060349	bone morphogenesis	biological_process	0.00013948	0.010462	6	179	82	19130	1	ENSOARG00000002613	5	ENSOARG00000004499,ENSOARG00000001680,ENSOARG00000005711,ENSOARG00000008507,ENSOARG00000010358
GO:0008584	male gonad development	biological_process	0.00015289	0.011149	6	179	85	19130	1	ENSOARG00000014525	5	ENSOARG00000009675,ENSOARG00000016334,ENSOARG00000009680,ENSOARG00000013941,ENSOARG00000001680
GO:0046546	development of primary male sexual characteristics	biological_process	0.00015289	0.011149	6	179	85	19130	1	ENSOARG00000014525	5	ENSOARG00000001680,ENSOARG00000009675,ENSOARG00000016334,ENSOARG00000009680,ENSOARG00000013941
GO:0050851	antigen receptor-mediated signaling pathway	biological_process	0.00017625	0.012541	6	179	88	19130	0		6	ENSOARG00000013646,ENSOARG00000008984,ENSOARG00000020968,ENSOARG00000015215,ENSOARG00000015718,ENSOARG00000013941
GO:0001823	mesonephros development	biological_process	0.00021234	0.014535	6	179	90	19130	0		6	ENSOARG00000020422,ENSOARG00000014623,ENSOARG00000016334,ENSOARG00000006908,ENSOARG00000013941,ENSOARG00000004787
GO:0003206	cardiac chamber morphogenesis	biological_process	0.00023586	0.015784	6	179	92	19130	2	ENSOARG00000020442,ENSOARG00000002613	4	ENSOARG00000001680,ENSOARG00000020422,ENSOARG00000013941,ENSOARG00000012948
GO:0002685	regulation of leukocyte migration	biological_process	0.00026919	0.017369	6	179	97	19130	1	ENSOARG00000011075	5	ENSOARG00000019090,ENSOARG00000009401,ENSOARG00000004964,ENSOARG00000004787,ENSOARG00000017562
GO:0003205	cardiac chamber development	biological_process	0.00056576	0.032332	6	179	107	19130	2	ENSOARG00000002613,ENSOARG00000020442	4	ENSOARG00000012948,ENSOARG00000013941,ENSOARG00000020422,ENSOARG00000001680
GO:0071772	response to BMP	biological_process	0.0010136	0.051985	6	179	120	19130	0		6	ENSOARG00000010358,ENSOARG00000003620,ENSOARG00000013941,ENSOARG00000020422,ENSOARG00000004499,ENSOARG00000001680
GO:0071773	cellular response to BMP stimulus	biological_process	0.0010136	0.051985	6	179	120	19130	0		6	ENSOARG00000010358,ENSOARG00000013941,ENSOARG00000003620,ENSOARG00000020422,ENSOARG00000004499,ENSOARG00000001680
GO:0070098	chemokine-mediated signaling pathway	biological_process	2.011e-05	0.002117	5	179	37	19130	0		5	ENSOARG00000004964,ENSOARG00000004787,ENSOARG00000010462,ENSOARG00000017562,ENSOARG00000002790
GO:0032623	interleukin-2 production	biological_process	6.5881e-05	0.0057328	5	179	45	19130	1	ENSOARG00000010969	4	ENSOARG00000013941,ENSOARG00000008984,ENSOARG00000015006,ENSOARG00000004356
GO:0046634	regulation of alpha-beta T cell activation	biological_process	0.00010405	0.0082882	5	179	51	19130	0		5	ENSOARG00000008984,ENSOARG00000015006,ENSOARG00000013646,ENSOARG00000015718,ENSOARG00000013941
GO:0060350	endochondral bone morphogenesis	biological_process	0.00011685	0.0091064	5	179	50	19130	1	ENSOARG00000002613	4	ENSOARG00000008507,ENSOARG00000010358,ENSOARG00000004499,ENSOARG00000005711
GO:0045582	positive regulation of T cell differentiation	biological_process	0.00013063	0.0098804	5	179	53	19130	0		5	ENSOARG00000013646,ENSOARG00000015006,ENSOARG00000020968,ENSOARG00000015718,ENSOARG00000013941
GO:2000106	regulation of leukocyte apoptotic process	biological_process	0.00017069	0.012193	5	179	56	19130	1	ENSOARG00000010969	4	ENSOARG00000008332,ENSOARG00000019090,ENSOARG00000004964,ENSOARG00000010939
GO:0050852	T cell receptor signaling pathway	biological_process	0.0002062	0.014168	5	179	58	19130	0		5	ENSOARG00000013941,ENSOARG00000015718,ENSOARG00000020968,ENSOARG00000013646,ENSOARG00000008984
GO:0008625	extrinsic apoptotic signaling pathway via death domain receptors	biological_process	0.00026123	0.017063	5	179	60	19130	0		5	ENSOARG00000010493,ENSOARG00000005846,ENSOARG00000020138,ENSOARG00000008127,ENSOARG00000001680
GO:0045621	positive regulation of lymphocyte differentiation	biological_process	0.00032417	0.020334	5	179	64	19130	0		5	ENSOARG00000013646,ENSOARG00000015006,ENSOARG00000020968,ENSOARG00000015718,ENSOARG00000013941
GO:0046632	alpha-beta T cell differentiation	biological_process	0.00035084	0.02163	5	179	65	19130	0		5	ENSOARG00000009401,ENSOARG00000013941,ENSOARG00000013646,ENSOARG00000015006,ENSOARG00000005579
GO:0032649	regulation of interferon-gamma production	biological_process	0.00050751	0.029567	5	179	71	19130	0		5	ENSOARG00000015006,ENSOARG00000008984,ENSOARG00000020249,ENSOARG00000019090,ENSOARG00000013941
GO:0071887	leukocyte apoptotic process	biological_process	0.00055645	0.03221	5	179	72	19130	1	ENSOARG00000010969	4	ENSOARG00000019090,ENSOARG00000004964,ENSOARG00000010939,ENSOARG00000008332
GO:0001656	metanephros development	biological_process	0.00081382	0.043646	5	179	76	19130	0		5	ENSOARG00000014623,ENSOARG00000016334,ENSOARG00000013941,ENSOARG00000004787,ENSOARG00000020422
GO:0032609	interferon-gamma production	biological_process	0.00088267	0.046462	5	179	80	19130	0		5	ENSOARG00000020249,ENSOARG00000019090,ENSOARG00000013941,ENSOARG00000015006,ENSOARG00000008984
GO:0002706	regulation of lymphocyte mediated immunity	biological_process	0.00098534	0.051118	5	179	82	19130	0		5	ENSOARG00000015718,ENSOARG00000019090,ENSOARG00000012145,ENSOARG00000014085,ENSOARG00000015006
GO:0070232	regulation of T cell apoptotic process	biological_process	7.0358e-05	0.0059186	4	179	24	19130	1	ENSOARG00000010969	3	ENSOARG00000019090,ENSOARG00000004964,ENSOARG00000008332
GO:0001958	endochondral ossification	biological_process	0.0001131	0.0088908	4	179	26	19130	0		4	ENSOARG00000008507,ENSOARG00000010358,ENSOARG00000004499,ENSOARG00000005711
GO:0036075	replacement ossification	biological_process	0.0001131	0.0088908	4	179	26	19130	0		4	ENSOARG00000008507,ENSOARG00000010358,ENSOARG00000005711,ENSOARG00000004499
GO:0010517	regulation of phospholipase activity	biological_process	0.0001672	0.01204	4	179	30	19130	1	ENSOARG00000011075	3	ENSOARG00000000994,ENSOARG00000004964,ENSOARG00000009653
GO:0035115	embryonic forelimb morphogenesis	biological_process	0.00018039	0.012685	4	179	31	19130	2	ENSOARG00000002613,ENSOARG00000019395	2	ENSOARG00000010358,ENSOARG00000009680
GO:0045123	cellular extravasation	biological_process	0.00019128	0.013398	4	179	31	19130	1	ENSOARG00000011075	3	ENSOARG00000000123,ENSOARG00000009401,ENSOARG00000019090
GO:0050798	activated T cell proliferation	biological_process	0.00023939	0.015908	4	179	33	19130	1	ENSOARG00000010969	3	ENSOARG00000019090,ENSOARG00000009250,ENSOARG00000003586
GO:0002709	regulation of T cell mediated immunity	biological_process	0.00026283	0.017063	4	179	34	19130	0		4	ENSOARG00000015718,ENSOARG00000019090,ENSOARG00000012145,ENSOARG00000015006
GO:0070231	T cell apoptotic process	biological_process	0.00037896	0.023126	4	179	37	19130	1	ENSOARG00000010969	3	ENSOARG00000019090,ENSOARG00000004964,ENSOARG00000008332
GO:0035136	forelimb morphogenesis	biological_process	0.00038141	0.023183	4	179	37	19130	2	ENSOARG00000019395,ENSOARG00000002613	2	ENSOARG00000009680,ENSOARG00000010358
GO:0046635	positive regulation of alpha-beta T cell activation	biological_process	0.00040463	0.024444	4	179	38	19130	0		4	ENSOARG00000008984,ENSOARG00000015006,ENSOARG00000013646,ENSOARG00000015718
GO:0072676	lymphocyte migration	biological_process	0.00047561	0.028164	4	179	40	19130	0		4	ENSOARG00000013941,ENSOARG00000000123,ENSOARG00000019090,ENSOARG00000004964
GO:0032663	regulation of interleukin-2 production	biological_process	0.00050469	0.029567	4	179	39	19130	0		4	ENSOARG00000013941,ENSOARG00000008984,ENSOARG00000004356,ENSOARG00000015006
GO:0070228	regulation of lymphocyte apoptotic process	biological_process	0.00056117	0.03221	4	179	41	19130	1	ENSOARG00000010969	3	ENSOARG00000008332,ENSOARG00000004964,ENSOARG00000019090
GO:0043367	CD4-positive, alpha-beta T cell differentiation	biological_process	0.00061254	0.034676	4	179	42	19130	0		4	ENSOARG00000015006,ENSOARG00000005579,ENSOARG00000009401,ENSOARG00000013941
GO:0060191	regulation of lipase activity	biological_process	0.0007243	0.039752	4	179	44	19130	1	ENSOARG00000011075	3	ENSOARG00000004964,ENSOARG00000000994,ENSOARG00000009653
GO:0035710	CD4-positive, alpha-beta T cell activation	biological_process	0.00086841	0.04598	4	179	46	19130	0		4	ENSOARG00000015006,ENSOARG00000005579,ENSOARG00000009401,ENSOARG00000013941
GO:0070100	negative regulation of chemokine-mediated signaling pathway	biological_process	3.452e-06	0.00046727	3	179	4	19130	0		3	ENSOARG00000004964,ENSOARG00000004787,ENSOARG00000002790
GO:0070099	regulation of chemokine-mediated signaling pathway	biological_process	8.1605e-06	0.0009417	3	179	5	19130	0		3	ENSOARG00000004964,ENSOARG00000004787,ENSOARG00000002790
GO:0045059	positive thymic T cell selection	biological_process	0.00016175	0.011741	3	179	12	19130	0		3	ENSOARG00000015718,ENSOARG00000009172,ENSOARG00000013646
GO:0045060	negative thymic T cell selection	biological_process	0.00016824	0.012067	3	179	12	19130	0		3	ENSOARG00000008984,ENSOARG00000013646,ENSOARG00000015718
GO:0046641	positive regulation of alpha-beta T cell proliferation	biological_process	0.00020256	0.013971	3	179	13	19130	0		3	ENSOARG00000015718,ENSOARG00000013646,ENSOARG00000008984
GO:0043383	negative T cell selection	biological_process	0.00021782	0.014797	3	179	13	19130	0		3	ENSOARG00000015718,ENSOARG00000013646,ENSOARG00000008984
GO:0032753	positive regulation of interleukin-4 production	biological_process	0.00025144	0.016581	3	179	14	19130	0		3	ENSOARG00000008984,ENSOARG00000015006,ENSOARG00000013941
GO:0070233	negative regulation of T cell apoptotic process	biological_process	0.00027487	0.017672	3	179	14	19130	1	ENSOARG00000010969	2	ENSOARG00000004964,ENSOARG00000008332
GO:0060065	uterus development	biological_process	0.00029022	0.018527	3	179	14	19130	0		3	ENSOARG00000013941,ENSOARG00000009675,ENSOARG00000009680
GO:0046640	regulation of alpha-beta T cell proliferation	biological_process	0.00056183	0.03221	3	179	18	19130	0		3	ENSOARG00000013646,ENSOARG00000008984,ENSOARG00000015718
GO:0032673	regulation of interleukin-4 production	biological_process	0.00063608	0.035896	3	179	19	19130	0		3	ENSOARG00000013941,ENSOARG00000008984,ENSOARG00000015006
GO:0045577	regulation of B cell differentiation	biological_process	0.00074808	0.040933	3	179	19	19130	0		3	ENSOARG00000015718,ENSOARG00000004356,ENSOARG00000012131
GO:0046633	alpha-beta T cell proliferation	biological_process	0.0009122	0.047737	3	179	21	19130	0		3	ENSOARG00000015718,ENSOARG00000013646,ENSOARG00000008984
GO:0070229	negative regulation of lymphocyte apoptotic process	biological_process	0.0010699	0.054559	3	179	22	19130	1	ENSOARG00000010969	2	ENSOARG00000004964,ENSOARG00000008332
GO:0060166	olfactory pit development	biological_process	0.00026249	0.017063	2	179	3	19130	0		2	ENSOARG00000004499,ENSOARG00000009599
GO:0051414	response to cortisol	biological_process	0.00027965	0.017915	2	179	3	19130	0		2	ENSOARG00000004787,ENSOARG00000002790
GO:0001554	luteolysis	biological_process	0.00030627	0.019278	2	179	3	19130	0		2	ENSOARG00000002790,ENSOARG00000004787
GO:0061364	apoptotic process involved in luteolysis	biological_process	0.00030627	0.019278	2	179	3	19130	0		2	ENSOARG00000004787,ENSOARG00000002790
GO:0071481	cellular response to X-ray	biological_process	0.00056086	0.03221	2	179	4	19130	0		2	ENSOARG00000013941,ENSOARG00000001680
GO:0070235	regulation of activation-induced cell death of T cells	biological_process	0.00081464	0.043646	2	179	5	19130	1	ENSOARG00000010969	1	ENSOARG00000019090
GO:0043435	response to corticotropin-releasing hormone	biological_process	0.00082212	0.043657	2	179	5	19130	0		2	ENSOARG00000010939,ENSOARG00000017214
GO:0071376	cellular response to corticotropin-releasing hormone stimulus	biological_process	0.00082212	0.043657	2	179	5	19130	0		2	ENSOARG00000017214,ENSOARG00000010939

## Sheet: SATvs.TAT
GO_accession	Description	Term_type	Over_represented_pValue	Corrected_pValue	DEG_item	DEG_list	Bg_item	Bg_list	Up	Up_Gene_names	Down	Down_Gene_names
GO:0065007	biological regulation	biological_process	3.2481e-05	0.012711	157	269	8700	19130	97	ENSOARG00000020233,ENSOARG00000019347,ENSOARG00000016271,ENSOARG00000005007,ENSOARG00000003437,ENSOARG00000016957,ENSOARG00000020761,ENSOARG00000018341,ENSOARG00000004497,ENSOARG00000016017,ENSOARG00000020838,ENSOARG00000005972,ENSOARG00000011005,ENSOARG00000015025,ENSOARG00000002053,ENSOARG00000003268,ENSOARG00000021090,ENSOARG00000005548,ENSOARG00000007344,ENSOARG00000008349,ENSOARG00000012075,…	60	ENSOARG00000002260,ENSOARG00000012375,ENSOARG00000004053,ENSOARG00000002740,ENSOARG00000013752,Novel01381,ENSOARG00000002535,ENSOARG00000021060,ENSOARG00000012499,ENSOARG00000012584,ENSOARG00000000119,ENSOARG00000000417,ENSOARG00000009333,ENSOARG00000006455,ENSOARG00000010653,ENSOARG00000016319,ENSOARG00000017769,ENSOARG00000019799,ENSOARG00000005188,ENSOARG00000006378,ENSOARG00000007297,ENSOARG0…
GO:0050789	regulation of biological process	biological_process	6.959e-05	0.023199	150	269	8309	19130	91	ENSOARG00000010088,ENSOARG00000009599,ENSOARG00000008246,ENSOARG00000011239,ENSOARG00000007814,ENSOARG00000009830,ENSOARG00000014260,ENSOARG00000010521,ENSOARG00000019840,ENSOARG00000002613,ENSOARG00000008262,ENSOARG00000016133,ENSOARG00000018337,ENSOARG00000011939,ENSOARG00000009627,ENSOARG00000009234,ENSOARG00000007525,ENSOARG00000017807,ENSOARG00000002587,ENSOARG00000018775,ENSOARG00000016570,…	59	ENSOARG00000018681,ENSOARG00000020186,ENSOARG00000014590,ENSOARG00000001016,ENSOARG00000019331,ENSOARG00000006240,ENSOARG00000016342,ENSOARG00000012608,ENSOARG00000011056,ENSOARG00000012314,ENSOARG00000020763,ENSOARG00000016282,ENSOARG00000000322,ENSOARG00000016764,ENSOARG00000019817,ENSOARG00000017964,ENSOARG00000016363,Novel01918,ENSOARG00000008521,ENSOARG00000016352,ENSOARG00000014433,ENSOARG0…
GO:0050794	regulation of cellular process	biological_process	0.0001103	0.034835	143	269	7893	19130	84	ENSOARG00000016133,ENSOARG00000008262,ENSOARG00000009627,ENSOARG00000018337,ENSOARG00000019840,ENSOARG00000002613,ENSOARG00000014260,ENSOARG00000010521,ENSOARG00000009830,ENSOARG00000009599,ENSOARG00000010088,ENSOARG00000011239,ENSOARG00000007814,ENSOARG00000008246,ENSOARG00000013144,ENSOARG00000020112,ENSOARG00000008480,ENSOARG00000020030,ENSOARG00000016570,ENSOARG00000014364,ENSOARG00000007525,…	59	ENSOARG00000012314,ENSOARG00000019817,ENSOARG00000016764,ENSOARG00000000322,ENSOARG00000016282,ENSOARG00000020763,ENSOARG00000014590,ENSOARG00000020186,ENSOARG00000018681,ENSOARG00000012608,ENSOARG00000011056,ENSOARG00000016342,ENSOARG00000006240,ENSOARG00000001016,ENSOARG00000019331,ENSOARG00000005766,ENSOARG00000009675,ENSOARG00000006626,ENSOARG00000001487,ENSOARG00000015581,ENSOARG00000011019,…
GO:0032501	multicellular organismal process	biological_process	5.8083e-05	0.020997	101	269	5011	19130	61	ENSOARG00000009830,ENSOARG00000014260,ENSOARG00000010521,ENSOARG00000011846,ENSOARG00000008246,ENSOARG00000013406,ENSOARG00000007814,ENSOARG00000011239,ENSOARG00000025180,ENSOARG00000009599,ENSOARG00000005581,ENSOARG00000009627,ENSOARG00000002475,ENSOARG00000011939,ENSOARG00000008262,ENSOARG00000016133,ENSOARG00000005117,ENSOARG00000002613,ENSOARG00000019840,ENSOARG00000005365,ENSOARG00000011340,…	40	ENSOARG00000020186,ENSOARG00000014590,ENSOARG00000018681,ENSOARG00000008637,ENSOARG00000011056,ENSOARG00000016342,ENSOARG00000010904,ENSOARG00000001016,ENSOARG00000012314,ENSOARG00000016764,ENSOARG00000003435,ENSOARG00000002849,ENSOARG00000016363,ENSOARG00000017964,ENSOARG00000016331,ENSOARG00000000945,ENSOARG00000014433,ENSOARG00000009675,ENSOARG00000006626,ENSOARG00000001487,ENSOARG00000011019,…
GO:0044707	single-multicellular organism process	biological_process	1.7648e-05	0.0082528	100	269	4817	19130	60	ENSOARG00000011846,ENSOARG00000009830,ENSOARG00000014260,ENSOARG00000010521,ENSOARG00000009599,ENSOARG00000005581,ENSOARG00000008246,ENSOARG00000007814,ENSOARG00000011239,ENSOARG00000025180,ENSOARG00000008262,ENSOARG00000016133,ENSOARG00000009627,ENSOARG00000011939,ENSOARG00000002475,ENSOARG00000019840,ENSOARG00000011340,ENSOARG00000005365,ENSOARG00000005117,ENSOARG00000002613,ENSOARG00000010473,…	40	ENSOARG00000008637,ENSOARG00000018681,ENSOARG00000014590,ENSOARG00000020186,ENSOARG00000001016,ENSOARG00000010904,ENSOARG00000016342,ENSOARG00000011056,ENSOARG00000012314,ENSOARG00000002849,ENSOARG00000016764,ENSOARG00000003435,ENSOARG00000017964,ENSOARG00000016363,ENSOARG00000014433,ENSOARG00000016331,ENSOARG00000000945,ENSOARG00000009675,ENSOARG00000011019,ENSOARG00000009680,ENSOARG00000001487,…
GO:0032502	developmental process	biological_process	8.6117e-06	0.0055367	88	269	3950	19130	52	ENSOARG00000008480,ENSOARG00000001750,ENSOARG00000010448,ENSOARG00000006073,ENSOARG00000018775,ENSOARG00000009234,ENSOARG00000017807,ENSOARG00000007525,ENSOARG00000005309,ENSOARG00000009957,ENSOARG00000003422,ENSOARG00000010473,ENSOARG00000020030,ENSOARG00000002613,ENSOARG00000011340,ENSOARG00000005365,ENSOARG00000002475,ENSOARG00000009627,ENSOARG00000016133,ENSOARG00000013406,ENSOARG00000008246,…	36	ENSOARG00000002260,ENSOARG00000002740,ENSOARG00000013752,ENSOARG00000012499,ENSOARG00000012584,ENSOARG00000017085,ENSOARG00000006455,ENSOARG00000016319,ENSOARG00000017769,ENSOARG00000019799,ENSOARG00000005188,ENSOARG00000006378,ENSOARG00000003530,ENSOARG00000004250,ENSOARG00000007297,ENSOARG00000013151,ENSOARG00000005434,ENSOARG00000009758,ENSOARG00000009675,ENSOARG00000001487,ENSOARG00000011019,…
GO:0044767	single-organism developmental process	biological_process	1.2397e-05	0.0071989	87	269	3921	19130	52	ENSOARG00000007034,ENSOARG00000005322,ENSOARG00000006614,ENSOARG00000003028,ENSOARG00000012355,ENSOARG00000012075,ENSOARG00000019936,ENSOARG00000007991,ENSOARG00000008349,ENSOARG00000012515,ENSOARG00000019463,ENSOARG00000011005,ENSOARG00000016153,ENSOARG00000002053,ENSOARG00000016017,ENSOARG00000020761,ENSOARG00000003437,ENSOARG00000005007,ENSOARG00000016271,ENSOARG00000009000,ENSOARG00000007977,…	35	ENSOARG00000002260,ENSOARG00000002740,ENSOARG00000013752,ENSOARG00000012499,ENSOARG00000012584,ENSOARG00000017085,ENSOARG00000006455,ENSOARG00000016319,ENSOARG00000017769,ENSOARG00000019799,ENSOARG00000005188,ENSOARG00000006378,ENSOARG00000007297,ENSOARG00000004250,ENSOARG00000003530,ENSOARG00000013151,ENSOARG00000005434,ENSOARG00000009758,ENSOARG00000009675,ENSOARG00000001487,ENSOARG00000011019,…
GO:0048856	anatomical structure development	biological_process	3.5021e-06	0.003079	84	269	3635	19130	51	ENSOARG00000016133,ENSOARG00000002475,ENSOARG00000009627,ENSOARG00000011340,ENSOARG00000005365,ENSOARG00000002613,ENSOARG00000011846,ENSOARG00000014260,ENSOARG00000009830,ENSOARG00000005581,ENSOARG00000009599,ENSOARG00000007814,ENSOARG00000011239,ENSOARG00000008246,ENSOARG00000013406,ENSOARG00000006073,ENSOARG00000010448,ENSOARG00000001750,ENSOARG00000008480,ENSOARG00000010473,ENSOARG00000003422,…	33	ENSOARG00000006455,ENSOARG00000012584,ENSOARG00000013752,ENSOARG00000012499,ENSOARG00000002260,ENSOARG00000002740,ENSOARG00000005434,ENSOARG00000009758,ENSOARG00000005188,ENSOARG00000006378,ENSOARG00000007297,ENSOARG00000003530,ENSOARG00000013151,ENSOARG00000017769,ENSOARG00000019799,ENSOARG00000016319,ENSOARG00000016331,ENSOARG00000000945,ENSOARG00000017964,ENSOARG00000016363,ENSOARG00000001487,…
GO:0048518	positive regulation of biological process	biological_process	1.7261e-05	0.0082528	84	269	3792	19130	52	ENSOARG00000020233,ENSOARG00000013346,ENSOARG00000020861,ENSOARG00000016547,ENSOARG00000003437,ENSOARG00000020761,ENSOARG00000018871,ENSOARG00000009845,ENSOARG00000016017,ENSOARG00000005972,ENSOARG00000009301,ENSOARG00000011005,ENSOARG00000015025,ENSOARG00000019463,ENSOARG00000007344,ENSOARG00000008349,ENSOARG00000019936,ENSOARG00000012075,ENSOARG00000006614,ENSOARG00000003028,ENSOARG00000016888,…	32	ENSOARG00000012314,ENSOARG00000000322,ENSOARG00000016764,ENSOARG00000019817,ENSOARG00000018681,ENSOARG00000016342,ENSOARG00000012608,ENSOARG00000006240,ENSOARG00000009675,ENSOARG00000006626,ENSOARG00000011019,ENSOARG00000008521,ENSOARG00000017964,ENSOARG00000016363,ENSOARG00000000945,ENSOARG00000017769,ENSOARG00000006378,ENSOARG00000005188,ENSOARG00000003530,ENSOARG00000011967,ENSOARG00000013151,…
GO:0007275	multicellular organismal development	biological_process	4.9198e-06	0.0036903	77	269	3258	19130	47	ENSOARG00000020030,ENSOARG00000010473,ENSOARG00000009957,ENSOARG00000003422,ENSOARG00000007525,ENSOARG00000017807,ENSOARG00000009234,ENSOARG00000018775,ENSOARG00000006073,ENSOARG00000010448,ENSOARG00000008480,ENSOARG00000011846,ENSOARG00000014260,ENSOARG00000009830,ENSOARG00000009599,ENSOARG00000005581,ENSOARG00000011239,ENSOARG00000007814,ENSOARG00000008246,ENSOARG00000016133,ENSOARG00000002475,…	30	ENSOARG00000016764,ENSOARG00000017769,ENSOARG00000002849,ENSOARG00000012314,ENSOARG00000016319,ENSOARG00000011056,ENSOARG00000016342,ENSOARG00000010904,ENSOARG00000009758,ENSOARG00000001016,ENSOARG00000005434,ENSOARG00000003530,ENSOARG00000007297,ENSOARG00000005188,ENSOARG00000006378,ENSOARG00000013151,ENSOARG00000013752,ENSOARG00000001487,ENSOARG00000012499,ENSOARG00000009680,ENSOARG00000011019,…
GO:0048522	positive regulation of cellular process	biological_process	7.3308e-06	0.0050757	77	269	3316	19130	46	ENSOARG00000010448,ENSOARG00000006073,ENSOARG00000008480,ENSOARG00000020112,ENSOARG00000007864,ENSOARG00000005309,ENSOARG00000013402,ENSOARG00000009957,ENSOARG00000020030,ENSOARG00000010418,ENSOARG00000009234,ENSOARG00000007525,ENSOARG00000009627,ENSOARG00000016133,ENSOARG00000019591,ENSOARG00000002613,ENSOARG00000009830,ENSOARG00000014260,ENSOARG00000008246,ENSOARG00000025180,ENSOARG00000007814,…	31	ENSOARG00000002260,ENSOARG00000012375,ENSOARG00000009675,ENSOARG00000002740,ENSOARG00000013752,ENSOARG00000006626,ENSOARG00000011019,ENSOARG00000012499,ENSOARG00000012584,ENSOARG00000008521,ENSOARG00000017964,ENSOARG00000016363,ENSOARG00000000417,ENSOARG00000000945,ENSOARG00000009333,ENSOARG00000010653,ENSOARG00000006455,ENSOARG00000012314,ENSOARG00000017769,ENSOARG00000000322,ENSOARG00000016764,…
GO:0048731	system development	biological_process	5.3028e-07	0.0013736	75	269	3009	19130	46	ENSOARG00000005322,ENSOARG00000007034,ENSOARG00000019936,ENSOARG00000012075,ENSOARG00000006614,ENSOARG00000003028,ENSOARG00000012355,ENSOARG00000008349,ENSOARG00000007991,ENSOARG00000012515,ENSOARG00000011005,ENSOARG00000016153,ENSOARG00000002053,ENSOARG00000003437,ENSOARG00000020761,ENSOARG00000007977,ENSOARG00000016547,ENSOARG00000005007,ENSOARG00000016271,ENSOARG00000009000,ENSOARG00000020233,…	29	ENSOARG00000016363,ENSOARG00000017964,ENSOARG00000012584,ENSOARG00000006455,ENSOARG00000000945,ENSOARG00000016331,ENSOARG00000002740,ENSOARG00000009675,ENSOARG00000002260,ENSOARG00000012499,ENSOARG00000011019,ENSOARG00000009680,ENSOARG00000001487,ENSOARG00000013752,ENSOARG00000013151,ENSOARG00000003530,ENSOARG00000007297,ENSOARG00000005188,ENSOARG00000006378,ENSOARG00000009758,ENSOARG00000005434,…
GO:0048513	organ development	biological_process	5.3413e-07	0.0013736	62	269	2310	19130	38	ENSOARG00000020233,ENSOARG00000007977,ENSOARG00000016547,ENSOARG00000005007,ENSOARG00000016271,ENSOARG00000009000,ENSOARG00000003437,ENSOARG00000016153,ENSOARG00000002053,ENSOARG00000012515,ENSOARG00000008349,ENSOARG00000007991,ENSOARG00000012075,ENSOARG00000019936,ENSOARG00000006614,ENSOARG00000003028,ENSOARG00000005322,ENSOARG00000007034,ENSOARG00000008480,ENSOARG00000006073,ENSOARG00000010448,…	24	ENSOARG00000002740,ENSOARG00000009675,ENSOARG00000002260,ENSOARG00000012499,ENSOARG00000009680,ENSOARG00000011019,ENSOARG00000001487,ENSOARG00000013752,ENSOARG00000016363,ENSOARG00000017964,ENSOARG00000016331,ENSOARG00000012314,ENSOARG00000016319,ENSOARG00000016764,ENSOARG00000017769,ENSOARG00000013151,ENSOARG00000007297,ENSOARG00000003530,ENSOARG00000006378,ENSOARG00000009758,ENSOARG00000005434,…
GO:0009893	positive regulation of metabolic process	biological_process	0.00014429	0.041513	56	269	2369	19130	32	ENSOARG00000010448,ENSOARG00000008480,ENSOARG00000005309,ENSOARG00000009957,ENSOARG00000013402,ENSOARG00000010418,ENSOARG00000018775,ENSOARG00000009234,ENSOARG00000009627,ENSOARG00000019591,ENSOARG00000016133,ENSOARG00000002613,ENSOARG00000009830,ENSOARG00000014260,ENSOARG00000018960,ENSOARG00000008246,ENSOARG00000011239,ENSOARG00000007814,ENSOARG00000005581,ENSOARG00000016547,ENSOARG00000013346,…	24	ENSOARG00000005434,ENSOARG00000012608,ENSOARG00000016342,ENSOARG00000018681,ENSOARG00000013151,ENSOARG00000011967,ENSOARG00000003530,ENSOARG00000006378,ENSOARG00000019817,ENSOARG00000017769,ENSOARG00000012314,ENSOARG00000010653,ENSOARG00000009333,ENSOARG00000000417,ENSOARG00000016363,ENSOARG00000008521,ENSOARG00000012499,ENSOARG00000011019,ENSOARG00000006626,ENSOARG00000013752,ENSOARG00000002740,…
GO:0009653	anatomical structure morphogenesis	biological_process	3.8708e-06	0.0031674	54	269	1962	19130	32	ENSOARG00000008349,ENSOARG00000012515,ENSOARG00000019463,ENSOARG00000007034,ENSOARG00000006614,ENSOARG00000012355,ENSOARG00000012075,ENSOARG00000019936,ENSOARG00000005007,ENSOARG00000016271,ENSOARG00000016547,ENSOARG00000020233,ENSOARG00000013346,ENSOARG00000011005,ENSOARG00000016153,ENSOARG00000002053,ENSOARG00000020761,ENSOARG00000003437,ENSOARG00000009627,ENSOARG00000002613,ENSOARG00000005365,…	22	ENSOARG00000016331,ENSOARG00000006455,ENSOARG00000012584,ENSOARG00000017964,ENSOARG00000016363,ENSOARG00000013752,ENSOARG00000001487,ENSOARG00000009680,ENSOARG00000012499,ENSOARG00000002260,ENSOARG00000009675,ENSOARG00000016342,ENSOARG00000011056,ENSOARG00000009758,ENSOARG00000005188,ENSOARG00000008637,ENSOARG00000013151,ENSOARG00000017769,ENSOARG00000000322,ENSOARG00000016764,ENSOARG00000016319,…
GO:0010604	positive regulation of macromolecule metabolic process	biological_process	0.0002254	0.052486	48	269	1972	19130	26	ENSOARG00000002613,ENSOARG00000009627,ENSOARG00000019591,ENSOARG00000016133,ENSOARG00000011239,ENSOARG00000007814,ENSOARG00000006614,ENSOARG00000008246,ENSOARG00000005581,ENSOARG00000012075,ENSOARG00000014260,ENSOARG00000007034,ENSOARG00000009830,ENSOARG00000008480,ENSOARG00000010448,ENSOARG00000020761,ENSOARG00000018775,ENSOARG00000003437,ENSOARG00000009234,ENSOARG00000009957,ENSOARG00000005972,…	22	ENSOARG00000017769,ENSOARG00000019817,ENSOARG00000012314,ENSOARG00000016342,ENSOARG00000012608,ENSOARG00000005434,ENSOARG00000006378,ENSOARG00000003530,ENSOARG00000011967,ENSOARG00000018681,ENSOARG00000013151,ENSOARG00000013752,ENSOARG00000006626,ENSOARG00000011019,ENSOARG00000012499,ENSOARG00000002260,ENSOARG00000012375,ENSOARG00000009675,ENSOARG00000002740,ENSOARG00000000417,ENSOARG00000008521,…
GO:0070887	cellular response to chemical stimulus	biological_process	5.4299e-08	0.0009249	47	269	1439	19130	36	ENSOARG00000013402,ENSOARG00000009957,ENSOARG00000018343,ENSOARG00000010418,ENSOARG00000016570,ENSOARG00000007525,ENSOARG00000006063,ENSOARG00000020112,ENSOARG00000008480,ENSOARG00000013144,ENSOARG00000014260,ENSOARG00000010521,ENSOARG00000009830,ENSOARG00000007814,ENSOARG00000025180,ENSOARG00000011239,ENSOARG00000008246,ENSOARG00000005581,ENSOARG00000009627,ENSOARG00000016133,ENSOARG00000019591,…	11	ENSOARG00000002519,ENSOARG00000021060,ENSOARG00000019817,ENSOARG00000006626,ENSOARG00000013752,ENSOARG00000017769,ENSOARG00000012375,ENSOARG00000000945,ENSOARG00000000417,ENSOARG00000013656,ENSOARG00000013151
GO:0051239	regulation of multicellular organismal process	biological_process	0.0001359	0.040107	46	269	1821	19130	29	ENSOARG00000005581,ENSOARG00000012075,ENSOARG00000007814,ENSOARG00000011239,ENSOARG00000025180,ENSOARG00000006614,ENSOARG00000008246,ENSOARG00000005322,ENSOARG00000011846,ENSOARG00000014260,ENSOARG00000010521,ENSOARG00000005117,ENSOARG00000002613,ENSOARG00000016133,ENSOARG00000008349,ENSOARG00000008262,ENSOARG00000007991,ENSOARG00000009627,ENSOARG00000011939,ENSOARG00000017807,ENSOARG00000007525,…	17	ENSOARG00000006455,ENSOARG00000000417,ENSOARG00000000945,ENSOARG00000017964,ENSOARG00000011019,ENSOARG00000009680,ENSOARG00000012499,ENSOARG00000013752,ENSOARG00000001487,ENSOARG00000006626,ENSOARG00000016342,ENSOARG00000011056,ENSOARG00000013151,ENSOARG00000006378,ENSOARG00000005188,ENSOARG00000017769,ENSOARG00000016764
GO:0002376	immune system process	biological_process	1.2622e-06	0.0018936	45	269	1506	19130	36	ENSOARG00000020861,ENSOARG00000013346,ENSOARG00000009000,ENSOARG00000005007,ENSOARG00000005236,ENSOARG00000020788,ENSOARG00000020761,ENSOARG00000018871,ENSOARG00000005972,ENSOARG00000009301,ENSOARG00000011005,ENSOARG00000016017,ENSOARG00000007991,ENSOARG00000007322,ENSOARG00000003028,ENSOARG00000008001,ENSOARG00000004721,ENSOARG00000020112,ENSOARG00000008480,ENSOARG00000016257,ENSOARG00000018775,…	9	ENSOARG00000004053,ENSOARG00000009680,ENSOARG00000011019,ENSOARG00000012499,ENSOARG00000017769,ENSOARG00000006626,ENSOARG00000013151,ENSOARG00000003530,ENSOARG00000000417
GO:0050793	regulation of developmental process	biological_process	8.7843e-05	0.028752	42	269	1577	19130	25	ENSOARG00000009627,ENSOARG00000007991,ENSOARG00000016133,ENSOARG00000008349,ENSOARG00000019463,ENSOARG00000002613,ENSOARG00000014260,ENSOARG00000005322,ENSOARG00000011846,ENSOARG00000006614,ENSOARG00000007814,ENSOARG00000011239,ENSOARG00000008246,ENSOARG00000005581,ENSOARG00000012075,ENSOARG00000013346,ENSOARG00000011005,ENSOARG00000005309,ENSOARG00000002053,ENSOARG00000016017,ENSOARG00000010473,…	17	ENSOARG00000016764,ENSOARG00000017769,ENSOARG00000000322,ENSOARG00000016342,ENSOARG00000004250,ENSOARG00000005188,ENSOARG00000006378,ENSOARG00000013151,ENSOARG00000013752,ENSOARG00000001487,ENSOARG00000012499,ENSOARG00000009680,ENSOARG00000011019,ENSOARG00000002740,ENSOARG00000000945,ENSOARG00000006455,ENSOARG00000017964
GO:0008283	cell proliferation	biological_process	6.2951e-06	0.004533	38	269	1233	19130	28	ENSOARG00000020112,ENSOARG00000013346,ENSOARG00000005236,ENSOARG00000009000,ENSOARG00000006073,ENSOARG00000010448,ENSOARG00000016547,ENSOARG00000002587,ENSOARG00000018775,ENSOARG00000018871,ENSOARG00000009234,ENSOARG00000011005,ENSOARG00000013402,ENSOARG00000009845,ENSOARG00000016017,ENSOARG00000002613,ENSOARG00000011340,ENSOARG00000008349,ENSOARG00000016133,ENSOARG00000007814,ENSOARG00000011239,…	10	ENSOARG00000015581,ENSOARG00000011019,ENSOARG00000020763,ENSOARG00000016764,ENSOARG00000013752,ENSOARG00000002740,ENSOARG00000012375,ENSOARG00000013151,ENSOARG00000012584,ENSOARG00000006378
GO:0042127	regulation of cell proliferation	biological_process	1.3937e-06	0.0019299	34	269	980	19130	24	ENSOARG00000009234,ENSOARG00000018871,ENSOARG00000002587,ENSOARG00000018775,ENSOARG00000016017,ENSOARG00000009845,ENSOARG00000013402,ENSOARG00000011005,ENSOARG00000013346,ENSOARG00000020112,ENSOARG00000010448,ENSOARG00000016547,ENSOARG00000006073,ENSOARG00000005236,ENSOARG00000019936,ENSOARG00000012075,ENSOARG00000007935,ENSOARG00000008246,ENSOARG00000007814,ENSOARG00000006614,ENSOARG00000009830,…	10	ENSOARG00000006378,ENSOARG00000012584,ENSOARG00000013151,ENSOARG00000002740,ENSOARG00000012375,ENSOARG00000016764,ENSOARG00000013752,ENSOARG00000015581,ENSOARG00000011019,ENSOARG00000020763
GO:0071310	cellular response to organic substance	biological_process	4.8651e-05	0.018246	34	269	1131	19130	25	ENSOARG00000007525,ENSOARG00000010418,ENSOARG00000009845,ENSOARG00000016570,ENSOARG00000009301,ENSOARG00000009957,ENSOARG00000013402,ENSOARG00000013144,ENSOARG00000020861,ENSOARG00000020112,ENSOARG00000008480,ENSOARG00000016547,ENSOARG00000006063,ENSOARG00000019936,ENSOARG00000007814,ENSOARG00000011239,ENSOARG00000025180,ENSOARG00000014260,ENSOARG00000003613,ENSOARG00000010521,ENSOARG00000015582,…	9	ENSOARG00000000945,ENSOARG00000013656,ENSOARG00000012375,ENSOARG00000002519,ENSOARG00000021060,ENSOARG00000006626,ENSOARG00000019817,ENSOARG00000017769,ENSOARG00000013752
GO:0051240	positive regulation of multicellular organismal process	biological_process	9.5745e-05	0.030779	30	269	980	19130	18	ENSOARG00000018775,ENSOARG00000017807,ENSOARG00000007525,ENSOARG00000011005,ENSOARG00000016017,ENSOARG00000013346,ENSOARG00000020233,ENSOARG00000008246,ENSOARG00000007814,ENSOARG00000025180,ENSOARG00000006614,ENSOARG00000011239,ENSOARG00000012075,ENSOARG00000005581,ENSOARG00000014260,ENSOARG00000010521,ENSOARG00000002613,ENSOARG00000016133	12	ENSOARG00000013151,ENSOARG00000017964,ENSOARG00000005188,ENSOARG00000006378,ENSOARG00000006455,ENSOARG00000000945,ENSOARG00000000417,ENSOARG00000016342,ENSOARG00000012499,ENSOARG00000011019,ENSOARG00000006626,ENSOARG00000013752
GO:0002682	regulation of immune system process	biological_process	4.6988e-06	0.0036777	29	269	808	19130	22	ENSOARG00000016017,ENSOARG00000009301,ENSOARG00000011005,ENSOARG00000009234,ENSOARG00000007525,ENSOARG00000018871,ENSOARG00000018775,ENSOARG00000020761,ENSOARG00000002587,ENSOARG00000005236,ENSOARG00000013346,ENSOARG00000008480,ENSOARG00000020112,ENSOARG00000008001,ENSOARG00000014260,ENSOARG00000010521,ENSOARG00000008246,ENSOARG00000007814,ENSOARG00000011239,ENSOARG00000016133,ENSOARG00000007991,…	7	ENSOARG00000004053,ENSOARG00000013151,ENSOARG00000003530,ENSOARG00000011019,ENSOARG00000009680,ENSOARG00000012499,ENSOARG00000006626
GO:0051094	positive regulation of developmental process	biological_process	1.0451e-05	0.0064163	29	269	825	19130	17	ENSOARG00000013346,ENSOARG00000016017,ENSOARG00000011005,ENSOARG00000007525,ENSOARG00000017807,ENSOARG00000018775,ENSOARG00000016133,ENSOARG00000008349,ENSOARG00000019463,ENSOARG00000002613,ENSOARG00000014260,ENSOARG00000012075,ENSOARG00000005581,ENSOARG00000008246,ENSOARG00000007814,ENSOARG00000011239,ENSOARG00000006614	12	ENSOARG00000013151,ENSOARG00000017964,ENSOARG00000006378,ENSOARG00000005188,ENSOARG00000006455,ENSOARG00000000945,ENSOARG00000016342,ENSOARG00000002740,ENSOARG00000011019,ENSOARG00000016764,ENSOARG00000013752,ENSOARG00000000322
GO:0006955	immune response	biological_process	1.671e-06	0.0021361	28	269	735	19130	23	ENSOARG00000014260,ENSOARG00000010521,ENSOARG00000008001,ENSOARG00000004721,ENSOARG00000007814,ENSOARG00000011239,ENSOARG00000003028,ENSOARG00000007991,ENSOARG00000009627,ENSOARG00000011939,ENSOARG00000007322,ENSOARG00000016133,ENSOARG00000009301,ENSOARG00000011005,ENSOARG00000005972,ENSOARG00000007864,ENSOARG00000018775,ENSOARG00000002587,ENSOARG00000016257,ENSOARG00000020112,ENSOARG00000008480,…	5	ENSOARG00000004053,ENSOARG00000011019,ENSOARG00000006626,ENSOARG00000000417,ENSOARG00000017769
GO:0009790	embryo development	biological_process	0.00017962	0.04544	27	269	863	19130	12	ENSOARG00000009830,ENSOARG00000002053,ENSOARG00000007034,ENSOARG00000006614,ENSOARG00000012075,ENSOARG00000019936,ENSOARG00000009599,ENSOARG00000016271,ENSOARG00000002613,ENSOARG00000012515,ENSOARG00000011340,ENSOARG00000020233	15	ENSOARG00000002260,ENSOARG00000012314,ENSOARG00000016319,ENSOARG00000009675,ENSOARG00000016764,ENSOARG00000013752,ENSOARG00000017769,ENSOARG00000012499,ENSOARG00000009680,ENSOARG00000017964,ENSOARG00000016331,ENSOARG00000011056,ENSOARG00000016342,ENSOARG00000009758,ENSOARG00000001016
GO:0009887	organ morphogenesis	biological_process	0.00021075	0.05088	25	269	783	19130	14	ENSOARG00000016271,ENSOARG00000008349,ENSOARG00000002613,ENSOARG00000011340,ENSOARG00000020233,ENSOARG00000007034,ENSOARG00000002053,ENSOARG00000016153,ENSOARG00000011846,ENSOARG00000006614,ENSOARG00000012075,ENSOARG00000019936,ENSOARG00000009599,ENSOARG00000003437	11	ENSOARG00000009758,ENSOARG00000016342,ENSOARG00000011056,ENSOARG00000017964,ENSOARG00000013151,ENSOARG00000016363,ENSOARG00000012499,ENSOARG00000013752,ENSOARG00000016764,ENSOARG00000016319,ENSOARG00000002260
GO:0048598	embryonic morphogenesis	biological_process	2.0981e-05	0.0087835	21	269	510	19130	9	ENSOARG00000016271,ENSOARG00000011340,ENSOARG00000002613,ENSOARG00000002053,ENSOARG00000007034,ENSOARG00000009599,ENSOARG00000019936,ENSOARG00000012075,ENSOARG00000006614	12	ENSOARG00000017964,ENSOARG00000016331,ENSOARG00000011056,ENSOARG00000016342,ENSOARG00000009758,ENSOARG00000002260,ENSOARG00000012314,ENSOARG00000009675,ENSOARG00000016319,ENSOARG00000016764,ENSOARG00000013752,ENSOARG00000009680
GO:0008284	positive regulation of cell proliferation	biological_process	2.7274e-05	0.010911	21	269	539	19130	14	ENSOARG00000019936,ENSOARG00000012075,ENSOARG00000018871,ENSOARG00000007814,ENSOARG00000006614,ENSOARG00000009845,ENSOARG00000013402,ENSOARG00000011005,ENSOARG00000013346,ENSOARG00000020112,ENSOARG00000002613,ENSOARG00000016547,ENSOARG00000016133,ENSOARG00000006073	7	ENSOARG00000006378,ENSOARG00000012584,ENSOARG00000013151,ENSOARG00000002740,ENSOARG00000012375,ENSOARG00000013752,ENSOARG00000011019
GO:0007389	pattern specification process	biological_process	4.3905e-07	0.0013736	20	269	370	19130	7	ENSOARG00000009830,ENSOARG00000016271,ENSOARG00000007034,ENSOARG00000006614,ENSOARG00000012515,ENSOARG00000019936,ENSOARG00000012075	13	ENSOARG00000013752,ENSOARG00000009680,ENSOARG00000002260,ENSOARG00000012314,ENSOARG00000016319,ENSOARG00000009675,ENSOARG00000016331,ENSOARG00000016342,ENSOARG00000009758,ENSOARG00000005434,ENSOARG00000006378,ENSOARG00000016363,ENSOARG00000017964
GO:0001501	skeletal system development	biological_process	1.0716e-06	0.0017537	20	269	387	19130	8	ENSOARG00000003437,ENSOARG00000002053,ENSOARG00000007034,ENSOARG00000009957,ENSOARG00000002613,ENSOARG00000012515,ENSOARG00000011340,ENSOARG00000016271	12	ENSOARG00000013752,ENSOARG00000016764,ENSOARG00000009680,ENSOARG00000012499,ENSOARG00000002260,ENSOARG00000009675,ENSOARG00000016319,ENSOARG00000016342,ENSOARG00000011056,ENSOARG00000016331,ENSOARG00000009758,ENSOARG00000006378
GO:0045597	positive regulation of cell differentiation	biological_process	0.00022741	0.052486	20	269	563	19130	12	ENSOARG00000019463,ENSOARG00000002613,ENSOARG00000016133,ENSOARG00000008349,ENSOARG00000008246,ENSOARG00000011239,ENSOARG00000007814,ENSOARG00000006614,ENSOARG00000012075,ENSOARG00000007525,ENSOARG00000014260,ENSOARG00000016017	8	ENSOARG00000017964,ENSOARG00000006378,ENSOARG00000005188,ENSOARG00000006455,ENSOARG00000000945,ENSOARG00000002740,ENSOARG00000011019,ENSOARG00000016764
GO:0048568	embryonic organ development	biological_process	2.204e-06	0.0022959	19	269	370	19130	9	ENSOARG00000009830,ENSOARG00000007034,ENSOARG00000002053,ENSOARG00000009599,ENSOARG00000019936,ENSOARG00000016271,ENSOARG00000011340,ENSOARG00000012515,ENSOARG00000002613	10	ENSOARG00000002260,ENSOARG00000016319,ENSOARG00000013752,ENSOARG00000017769,ENSOARG00000016764,ENSOARG00000012499,ENSOARG00000016342,ENSOARG00000011056,ENSOARG00000001016,ENSOARG00000009758
GO:0003002	regionalization	biological_process	1.8985e-06	0.0021361	17	269	303	19130	6	ENSOARG00000016271,ENSOARG00000007034,ENSOARG00000009830,ENSOARG00000012075,ENSOARG00000019936,ENSOARG00000012515	11	ENSOARG00000009680,ENSOARG00000013752,ENSOARG00000009675,ENSOARG00000016319,ENSOARG00000012314,ENSOARG00000002260,ENSOARG00000009758,ENSOARG00000016342,ENSOARG00000016331,ENSOARG00000017964,ENSOARG00000016363
GO:0046649	lymphocyte activation	biological_process	0.00014555	0.041513	17	269	430	19130	15	ENSOARG00000009627,ENSOARG00000009000,ENSOARG00000005236,ENSOARG00000016133,ENSOARG00000020112,ENSOARG00000007864,ENSOARG00000016017,ENSOARG00000007814,ENSOARG00000018775,ENSOARG00000011239,ENSOARG00000002587,ENSOARG00000003028,ENSOARG00000018871,ENSOARG00000007525,ENSOARG00000009234	2	ENSOARG00000011019,ENSOARG00000003530
GO:0009952	anterior/posterior pattern specification	biological_process	1.0276e-07	0.0009249	15	269	190	19130	6	ENSOARG00000009830,ENSOARG00000016271,ENSOARG00000007034,ENSOARG00000019936,ENSOARG00000012075,ENSOARG00000012515	9	ENSOARG00000016319,ENSOARG00000009675,ENSOARG00000012314,ENSOARG00000009680,ENSOARG00000013752,ENSOARG00000016363,ENSOARG00000009758,ENSOARG00000016342,ENSOARG00000016331
GO:0002694	regulation of leukocyte activation	biological_process	2.4236e-05	0.0099159	15	269	301	19130	12	ENSOARG00000016133,ENSOARG00000009627,ENSOARG00000005236,ENSOARG00000020112,ENSOARG00000016017,ENSOARG00000007525,ENSOARG00000009234,ENSOARG00000018775,ENSOARG00000007814,ENSOARG00000002587,ENSOARG00000011239,ENSOARG00000018871	3	ENSOARG00000004053,ENSOARG00000003530,ENSOARG00000011019
GO:0050865	regulation of cell activation	biological_process	5.8319e-05	0.020997	15	269	324	19130	12	ENSOARG00000018871,ENSOARG00000018775,ENSOARG00000007814,ENSOARG00000002587,ENSOARG00000011239,ENSOARG00000009234,ENSOARG00000007525,ENSOARG00000016017,ENSOARG00000020112,ENSOARG00000005236,ENSOARG00000009627,ENSOARG00000016133	3	ENSOARG00000011019,ENSOARG00000004053,ENSOARG00000003530
GO:0006935	chemotaxis	biological_process	0.00015389	0.041513	15	269	355	19130	11	ENSOARG00000004721,ENSOARG00000014260,ENSOARG00000010521,ENSOARG00000011005,ENSOARG00000003028,ENSOARG00000007814,ENSOARG00000016133,ENSOARG00000009000,ENSOARG00000009627,ENSOARG00000019840,ENSOARG00000013346	4	ENSOARG00000013151,ENSOARG00000000417,ENSOARG00000001487,ENSOARG00000013752
GO:0042330	taxis	biological_process	0.00015389	0.041513	15	269	355	19130	11	ENSOARG00000003028,ENSOARG00000007814,ENSOARG00000004721,ENSOARG00000011005,ENSOARG00000010521,ENSOARG00000014260,ENSOARG00000013346,ENSOARG00000019840,ENSOARG00000016133,ENSOARG00000009000,ENSOARG00000009627	4	ENSOARG00000013151,ENSOARG00000001487,ENSOARG00000000417,ENSOARG00000013752
GO:0051249	regulation of lymphocyte activation	biological_process	1.8338e-05	0.0082528	14	269	259	19130	12	ENSOARG00000020112,ENSOARG00000016133,ENSOARG00000005236,ENSOARG00000009627,ENSOARG00000009234,ENSOARG00000007525,ENSOARG00000018871,ENSOARG00000018775,ENSOARG00000007814,ENSOARG00000011239,ENSOARG00000002587,ENSOARG00000016017	2	ENSOARG00000011019,ENSOARG00000003530
GO:0048562	embryonic organ morphogenesis	biological_process	2.0472e-05	0.0087746	14	269	252	19130	7	ENSOARG00000019936,ENSOARG00000011340,ENSOARG00000009599,ENSOARG00000002613,ENSOARG00000016271,ENSOARG00000002053,ENSOARG00000007034	7	ENSOARG00000016319,ENSOARG00000002260,ENSOARG00000009758,ENSOARG00000016764,ENSOARG00000011056,ENSOARG00000013752,ENSOARG00000016342
GO:0070486	leukocyte aggregation	biological_process	0.00013373	0.040107	14	269	310	19130	13	ENSOARG00000020112,ENSOARG00000005236,ENSOARG00000009000,ENSOARG00000009627,ENSOARG00000016133,ENSOARG00000003028,ENSOARG00000018871,ENSOARG00000018775,ENSOARG00000011239,ENSOARG00000002587,ENSOARG00000007814,ENSOARG00000007864,ENSOARG00000016017	1	ENSOARG00000000417
GO:0009617	response to bacterium	biological_process	0.00013053	0.039827	13	269	283	19130	12	ENSOARG00000019840,ENSOARG00000007344,ENSOARG00000020112,ENSOARG00000020393,ENSOARG00000009627,ENSOARG00000007525,ENSOARG00000018871,ENSOARG00000025180,ENSOARG00000007814,ENSOARG00000013402,ENSOARG00000010521,ENSOARG00000011005	1	ENSOARG00000017769
GO:0046651	lymphocyte proliferation	biological_process	1.3299e-05	0.0074562	12	269	187	19130	11	ENSOARG00000009234,ENSOARG00000003028,ENSOARG00000011239,ENSOARG00000002587,ENSOARG00000007814,ENSOARG00000018775,ENSOARG00000016017,ENSOARG00000020112,ENSOARG00000016133,ENSOARG00000005236,ENSOARG00000009000	1	ENSOARG00000011019
GO:0032943	mononuclear cell proliferation	biological_process	1.4112e-05	0.0074719	12	269	188	19130	11	ENSOARG00000009234,ENSOARG00000003028,ENSOARG00000002587,ENSOARG00000011239,ENSOARG00000007814,ENSOARG00000018775,ENSOARG00000016017,ENSOARG00000020112,ENSOARG00000016133,ENSOARG00000005236,ENSOARG00000009000	1	ENSOARG00000011019
GO:0070661	leukocyte proliferation	biological_process	1.8214e-05	0.0082528	12	269	193	19130	11	ENSOARG00000020112,ENSOARG00000009000,ENSOARG00000005236,ENSOARG00000016133,ENSOARG00000003028,ENSOARG00000011239,ENSOARG00000002587,ENSOARG00000007814,ENSOARG00000018775,ENSOARG00000009234,ENSOARG00000016017	1	ENSOARG00000011019
GO:0048706	embryonic skeletal system development	biological_process	8.6909e-07	0.0017537	11	269	117	19130	4	ENSOARG00000011340,ENSOARG00000012515,ENSOARG00000002613,ENSOARG00000007034	7	ENSOARG00000009680,ENSOARG00000009758,ENSOARG00000013752,ENSOARG00000016342,ENSOARG00000011056,ENSOARG00000016319,ENSOARG00000002260
GO:0048736	appendage development	biological_process	1.7144e-05	0.0082528	11	269	155	19130	4	ENSOARG00000003437,ENSOARG00000002613,ENSOARG00000012515,ENSOARG00000006614	7	ENSOARG00000016342,ENSOARG00000013752,ENSOARG00000016331,ENSOARG00000009680,ENSOARG00000009675,ENSOARG00000012314,ENSOARG00000016363
GO:0060173	limb development	biological_process	1.7144e-05	0.0082528	11	269	155	19130	4	ENSOARG00000003437,ENSOARG00000012515,ENSOARG00000002613,ENSOARG00000006614	7	ENSOARG00000013752,ENSOARG00000016342,ENSOARG00000016331,ENSOARG00000009680,ENSOARG00000009675,ENSOARG00000012314,ENSOARG00000016363
GO:0060326	cell chemotaxis	biological_process	1.9857e-05	0.0087187	11	269	174	19130	9	ENSOARG00000004721,ENSOARG00000011005,ENSOARG00000014260,ENSOARG00000010521,ENSOARG00000007814,ENSOARG00000016133,ENSOARG00000009627,ENSOARG00000009000,ENSOARG00000013346	2	ENSOARG00000000417,ENSOARG00000013151
GO:0097529	myeloid leukocyte migration	biological_process	1.0307e-06	0.0017537	10	269	100	19130	8	ENSOARG00000013346,ENSOARG00000009627,ENSOARG00000009000,ENSOARG00000016133,ENSOARG00000007814,ENSOARG00000011005,ENSOARG00000010521,ENSOARG00000014260	2	ENSOARG00000013151,ENSOARG00000000417
GO:0030595	leukocyte chemotaxis	biological_process	3.1729e-06	0.0030063	10	269	114	19130	8	ENSOARG00000016133,ENSOARG00000009000,ENSOARG00000009627,ENSOARG00000013346,ENSOARG00000011005,ENSOARG00000010521,ENSOARG00000014260,ENSOARG00000007814	2	ENSOARG00000013151,ENSOARG00000000417
GO:0002237	response to molecule of bacterial origin	biological_process	6.1222e-05	0.02161	10	269	151	19130	9	ENSOARG00000013402,ENSOARG00000010521,ENSOARG00000011005,ENSOARG00000025180,ENSOARG00000007525,ENSOARG00000009627,ENSOARG00000007344,ENSOARG00000020112,ENSOARG00000019840	1	ENSOARG00000017769
GO:0048704	embryonic skeletal system morphogenesis	biological_process	3.5918e-06	0.003079	9	269	87	19130	3	ENSOARG00000002613,ENSOARG00000011340,ENSOARG00000007034	6	ENSOARG00000002260,ENSOARG00000016319,ENSOARG00000016342,ENSOARG00000013752,ENSOARG00000011056,ENSOARG00000009758
GO:0006909	phagocytosis	biological_process	8.1465e-06	0.0054316	9	269	92	19130	9	ENSOARG00000018871,ENSOARG00000003028,ENSOARG00000007814,ENSOARG00000007525,ENSOARG00000009301,ENSOARG00000007344,ENSOARG00000008480,ENSOARG00000009627,ENSOARG00000016133	0
GO:0042098	T cell proliferation	biological_process	0.00011397	0.035373	9	269	135	19130	9	ENSOARG00000003028,ENSOARG00000007814,ENSOARG00000002587,ENSOARG00000018775,ENSOARG00000016017,ENSOARG00000020112,ENSOARG00000005236,ENSOARG00000009000,ENSOARG00000016133	0
GO:0032496	response to lipopolysaccharide	biological_process	0.000152	0.041513	9	269	137	19130	8	ENSOARG00000025180,ENSOARG00000007525,ENSOARG00000013402,ENSOARG00000010521,ENSOARG00000020112,ENSOARG00000007344,ENSOARG00000019840,ENSOARG00000009627	1	ENSOARG00000017769
GO:0035107	appendage morphogenesis	biological_process	0.00015912	0.041513	9	269	135	19130	3	ENSOARG00000006614,ENSOARG00000002613,ENSOARG00000012515	6	ENSOARG00000009680,ENSOARG00000016342,ENSOARG00000013752,ENSOARG00000016331,ENSOARG00000009675,ENSOARG00000012314
GO:0035108	limb morphogenesis	biological_process	0.00015912	0.041513	9	269	135	19130	3	ENSOARG00000002613,ENSOARG00000006614,ENSOARG00000012515	6	ENSOARG00000012314,ENSOARG00000009675,ENSOARG00000009680,ENSOARG00000016331,ENSOARG00000016342,ENSOARG00000013752
GO:0050670	regulation of lymphocyte proliferation	biological_process	0.00018174	0.04544	9	269	144	19130	8	ENSOARG00000020112,ENSOARG00000005236,ENSOARG00000016133,ENSOARG00000007814,ENSOARG00000002587,ENSOARG00000018775,ENSOARG00000009234,ENSOARG00000016017	1	ENSOARG00000011019
GO:0032944	regulation of mononuclear cell proliferation	biological_process	0.00019264	0.047505	9	269	145	19130	8	ENSOARG00000016017,ENSOARG00000007814,ENSOARG00000018775,ENSOARG00000002587,ENSOARG00000009234,ENSOARG00000005236,ENSOARG00000016133,ENSOARG00000020112	1	ENSOARG00000011019
GO:0070663	regulation of leukocyte proliferation	biological_process	0.00021308	0.05088	9	269	147	19130	8	ENSOARG00000020112,ENSOARG00000005236,ENSOARG00000016133,ENSOARG00000002587,ENSOARG00000007814,ENSOARG00000018775,ENSOARG00000009234,ENSOARG00000016017	1	ENSOARG00000011019
GO:0071621	granulocyte chemotaxis	biological_process	9.7737e-07	0.0017537	8	269	58	19130	7	ENSOARG00000013346,ENSOARG00000007814,ENSOARG00000016133,ENSOARG00000009000,ENSOARG00000010521,ENSOARG00000009627,ENSOARG00000011005	1	ENSOARG00000000417
GO:0097530	granulocyte migration	biological_process	1.8674e-06	0.0021361	8	269	63	19130	7	ENSOARG00000007814,ENSOARG00000013346,ENSOARG00000009627,ENSOARG00000011005,ENSOARG00000010521,ENSOARG00000009000,ENSOARG00000016133	1	ENSOARG00000000417
GO:0071216	cellular response to biotic stimulus	biological_process	0.0002148	0.05088	8	269	112	19130	8	ENSOARG00000007814,ENSOARG00000025180,ENSOARG00000007525,ENSOARG00000010521,ENSOARG00000007344,ENSOARG00000020112,ENSOARG00000019840,ENSOARG00000009627	0
GO:0045807	positive regulation of endocytosis	biological_process	0.00015906	0.041513	7	269	79	19130	7	ENSOARG00000009627,ENSOARG00000016133,ENSOARG00000007814,ENSOARG00000025180,ENSOARG00000003028,ENSOARG00000018871,ENSOARG00000007525	0
GO:0009954	proximal/distal pattern formation	biological_process	2.2956e-06	0.0022959	6	269	29	19130	0		6	ENSOARG00000009680,ENSOARG00000016331,ENSOARG00000016342,ENSOARG00000012314,ENSOARG00000017964,ENSOARG00000009675
GO:0030593	neutrophil chemotaxis	biological_process	4.3572e-05	0.016689	6	269	47	19130	5	ENSOARG00000009000,ENSOARG00000011005,ENSOARG00000010521,ENSOARG00000016133,ENSOARG00000007814	1	ENSOARG00000000417
GO:0050764	regulation of phagocytosis	biological_process	6.5362e-05	0.022628	6	269	48	19130	6	ENSOARG00000008480,ENSOARG00000003028,ENSOARG00000018871,ENSOARG00000007814,ENSOARG00000009627,ENSOARG00000016133	0
GO:1990266	neutrophil migration	biological_process	6.7963e-05	0.023084	6	269	51	19130	5	ENSOARG00000007814,ENSOARG00000016133,ENSOARG00000009000,ENSOARG00000010521,ENSOARG00000011005	1	ENSOARG00000000417
GO:0070493	thrombin receptor signaling pathway	biological_process	0.00017022	0.043776	3	269	8	19130	2	ENSOARG00000016918,ENSOARG00000016888	1	ENSOARG00000016282

## Sheet: VATvs.TAT
GO_accession	Description	Term_type	Over_represented_pValue	Corrected_pValue	DEG_item	DEG_list	Bg_item	Bg_list	Up	Up_Gene_names	Down	Down_Gene_names
GO:0008150	biological_process	biological_process	5.2767e-05	0.0026313	582	677	15215	19130	442	ENSOARG00000012515,ENSOARG00000001968,ENSOARG00000007252,ENSOARG00000001060,ENSOARG00000005236,ENSOARG00000015592,ENSOARG00000001980,ENSOARG00000013079,ENSOARG00000006135,ENSOARG00000014898,ENSOARG00000025182,ENSOARG00000001783,ENSOARG00000020734,ENSOARG00000005007,ENSOARG00000009972,ENSOARG00000011944,ENSOARG00000014103,ENSOARG00000016505,ENSOARG00000016922,ENSOARG00000009779,ENSOARG00000010473,…	140	ENSOARG00000019817,ENSOARG00000020665,ENSOARG00000013010,ENSOARG00000002937,ENSOARG00000011352,ENSOARG00000016342,ENSOARG00000016766,ENSOARG00000019031,ENSOARG00000015118,ENSOARG00000012667,Novel01864,ENSOARG00000002449,ENSOARG00000017550,ENSOARG00000011464,ENSOARG00000017964,ENSOARG00000011056,ENSOARG00000004250,ENSOARG00000011565,ENSOARG00000001516,ENSOARG00000013752,Novel00975,Novel00685,ENSOA…
GO:0009987	cellular process	biological_process	0.00073821	0.022717	498	677	12835	19130	385	ENSOARG00000009401,ENSOARG00000015044,ENSOARG00000016334,ENSOARG00000004208,ENSOARG00000010318,ENSOARG00000005846,ENSOARG00000014750,ENSOARG00000012367,ENSOARG00000013529,ENSOARG00000019067,ENSOARG00000010939,ENSOARG00000003908,ENSOARG00000019670,ENSOARG00000010410,ENSOARG00000004010,ENSOARG00000005322,ENSOARG00000008984,ENSOARG00000003604,ENSOARG00000003422,ENSOARG00000000950,ENSOARG00000020676,…	113	ENSOARG00000020665,ENSOARG00000013010,ENSOARG00000019817,ENSOARG00000003149,ENSOARG00000016342,ENSOARG00000019235,ENSOARG00000004088,ENSOARG00000011352,ENSOARG00000015118,ENSOARG00000006117,ENSOARG00000016766,ENSOARG00000017474,ENSOARG00000015038,ENSOARG00000015282,ENSOARG00000019031,ENSOARG00000004502,Novel01864,ENSOARG00000017550,ENSOARG00000011464,ENSOARG00000002449,ENSOARG00000012667,Novel009…
GO:0044699	single-organism process	biological_process	6.9416e-15	2.4502e-12	497	677	11151	19130	385	ENSOARG00000015578,ENSOARG00000006139,ENSOARG00000002811,ENSOARG00000011171,ENSOARG00000015348,ENSOARG00000009399,ENSOARG00000008380,ENSOARG00000003798,ENSOARG00000000123,ENSOARG00000008161,ENSOARG00000005167,ENSOARG00000017892,ENSOARG00000019197,ENSOARG00000020959,ENSOARG00000000405,ENSOARG00000006421,ENSOARG00000011842,ENSOARG00000011239,ENSOARG00000008232,ENSOARG00000009172,ENSOARG00000013482,…	112	ENSOARG00000020186,ENSOARG00000001444,ENSOARG00000002555,ENSOARG00000006212,ENSOARG00000016363,ENSOARG00000001504,Novel01101,ENSOARG00000014198,ENSOARG00000000450,ENSOARG00000005781,ENSOARG00000004617,ENSOARG00000018548,ENSOARG00000019395,ENSOARG00000016285,ENSOARG00000013739,ENSOARG00000021001,ENSOARG00000005434,ENSOARG00000012314,ENSOARG00000011128,ENSOARG00000004312,ENSOARG00000007493,ENSOARG0…
GO:0044763	single-organism cellular process	biological_process	4.1515e-11	7.8668e-09	435	677	9757	19130	346	ENSOARG00000015727,ENSOARG00000013157,ENSOARG00000021005,ENSOARG00000003585,ENSOARG00000013367,ENSOARG00000013931,ENSOARG00000007991,ENSOARG00000004787,ENSOARG00000012400,ENSOARG00000008480,ENSOARG00000015215,ENSOARG00000009084,ENSOARG00000003963,ENSOARG00000019840,ENSOARG00000007758,ENSOARG00000010462,ENSOARG00000014277,ENSOARG00000019876,ENSOARG00000011235,ENSOARG00000005075,ENSOARG00000015703,…	89	ENSOARG00000001487,ENSOARG00000010184,ENSOARG00000014433,ENSOARG00000017769,ENSOARG00000014824,ENSOARG00000012178,ENSOARG00000002386,ENSOARG00000002554,ENSOARG00000019145,ENSOARG00000017168,ENSOARG00000001159,ENSOARG00000004871,ENSOARG00000014723,ENSOARG00000014425,ENSOARG00000002033,ENSOARG00000000431,ENSOARG00000008558,ENSOARG00000008554,ENSOARG00000008534,ENSOARG00000006378,ENSOARG00000019246,…
GO:0065007	biological regulation	biological_process	4.4836e-17	2.0178e-14	419	677	8700	19130	341	ENSOARG00000007932,ENSOARG00000012094,ENSOARG00000006813,ENSOARG00000014582,ENSOARG00000017739,ENSOARG00000018838,ENSOARG00000012064,ENSOARG00000015286,ENSOARG00000015379,ENSOARG00000011933,ENSOARG00000009800,ENSOARG00000009256,ENSOARG00000010521,ENSOARG00000002479,ENSOARG00000004086,ENSOARG00000003112,ENSOARG00000008526,ENSOARG00000014762,ENSOARG00000014288,ENSOARG00000013446,ENSOARG00000015236,…	78	ENSOARG00000005781,ENSOARG00000004617,ENSOARG00000001504,ENSOARG00000000450,ENSOARG00000019395,ENSOARG00000016285,ENSOARG00000001444,ENSOARG00000020186,ENSOARG00000002555,ENSOARG00000016363,ENSOARG00000006212,ENSOARG00000006378,ENSOARG00000009194,ENSOARG00000020287,ENSOARG00000006526,ENSOARG00000008521,ENSOARG00000004312,ENSOARG00000004314,ENSOARG00000007493,ENSOARG00000021001,ENSOARG00000012314,…
GO:0050789	regulation of biological process	biological_process	3.1573e-18	1.8335e-15	409	677	8309	19130	334	ENSOARG00000012362,ENSOARG00000012131,ENSOARG00000003844,ENSOARG00000009791,ENSOARG00000016622,ENSOARG00000011110,ENSOARG00000016138,ENSOARG00000010080,ENSOARG00000001397,ENSOARG00000020138,ENSOARG00000002263,ENSOARG00000004983,ENSOARG00000008908,ENSOARG00000012461,ENSOARG00000017265,ENSOARG00000018226,ENSOARG00000009921,ENSOARG00000001094,ENSOARG00000009827,ENSOARG00000008893,ENSOARG00000017214,…	75	ENSOARG00000016766,ENSOARG00000017474,ENSOARG00000015118,ENSOARG00000012667,Novel01864,ENSOARG00000011464,ENSOARG00000017550,ENSOARG00000019817,ENSOARG00000013010,ENSOARG00000011352,ENSOARG00000016342,ENSOARG00000019235,ENSOARG00000002366,ENSOARG00000016352,ENSOARG00000020763,ENSOARG00000001264,ENSOARG00000006034,ENSOARG00000016764,ENSOARG00000004414,ENSOARG00000020376,ENSOARG00000020519,ENSOARG0…
GO:0050794	regulation of cellular process	biological_process	1.6225e-19	1.0432e-16	398	677	7893	19130	325	ENSOARG00000007984,ENSOARG00000005006,ENSOARG00000008285,ENSOARG00000003254,ENSOARG00000007229,ENSOARG00000025194,ENSOARG00000021097,ENSOARG00000003782,ENSOARG00000016937,ENSOARG00000006760,ENSOARG00000016115,ENSOARG00000014774,ENSOARG00000015167,ENSOARG00000015180,ENSOARG00000008340,ENSOARG00000014123,ENSOARG00000006358,ENSOARG00000020437,ENSOARG00000004403,ENSOARG00000007774,ENSOARG00000020818,…	73	ENSOARG00000016342,ENSOARG00000019235,ENSOARG00000011352,ENSOARG00000013010,ENSOARG00000019817,ENSOARG00000017550,ENSOARG00000011464,Novel01864,ENSOARG00000012667,ENSOARG00000015118,ENSOARG00000016766,ENSOARG00000017474,ENSOARG00000018980,ENSOARG00000000322,ENSOARG00000012490,ENSOARG00000011865,Novel00685,ENSOARG00000000417,ENSOARG00000013752,ENSOARG00000013151,ENSOARG00000004250,ENSOARG000000110…
GO:0050896	response to stimulus	biological_process	6.0133e-25	1.0825e-21	349	677	6193	19130	286	ENSOARG00000011380,ENSOARG00000020351,ENSOARG00000002307,ENSOARG00000005579,ENSOARG00000009341,ENSOARG00000009234,ENSOARG00000020968,ENSOARG00000006591,ENSOARG00000008091,ENSOARG00000013173,ENSOARG00000018039,ENSOARG00000008208,ENSOARG00000015718,ENSOARG00000012299,ENSOARG00000005322,ENSOARG00000008984,ENSOARG00000003604,ENSOARG00000013529,ENSOARG00000012367,ENSOARG00000010939,ENSOARG00000019067,…	63	ENSOARG00000017168,ENSOARG00000020519,ENSOARG00000004871,Novel01912,ENSOARG00000014425,ENSOARG00000014723,ENSOARG00000001264,ENSOARG00000004414,ENSOARG00000016764,ENSOARG00000020763,Novel01381,ENSOARG00000000431,ENSOARG00000008554,ENSOARG00000002366,ENSOARG00000008534,ENSOARG00000018980,ENSOARG00000001487,ENSOARG00000017769,ENSOARG00000014433,Novel02176,ENSOARG00000011865,ENSOARG00000014824,ENSOA…
GO:0051716	cellular response to stimulus	biological_process	6.7902e-19	4.2151e-16	294	677	5241	19130	247	ENSOARG00000003963,ENSOARG00000015215,ENSOARG00000020030,ENSOARG00000019840,Novel02027,Novel00990,ENSOARG00000010462,ENSOARG00000010199,ENSOARG00000015723,ENSOARG00000019876,ENSOARG00000001574,ENSOARG00000014277,ENSOARG00000017093,ENSOARG00000003099,ENSOARG00000000085,ENSOARG00000000571,ENSOARG00000001980,ENSOARG00000013079,ENSOARG00000015592,ENSOARG00000001060,ENSOARG00000021005,ENSOARG000000131…	47	ENSOARG00000001504,ENSOARG00000002449,ENSOARG00000017550,ENSOARG00000000450,Novel01864,ENSOARG00000018548,ENSOARG00000004617,ENSOARG00000016285,ENSOARG00000020186,ENSOARG00000015118,ENSOARG00000016766,ENSOARG00000017474,ENSOARG00000002555,ENSOARG00000006378,ENSOARG00000020287,ENSOARG00000008521,ENSOARG00000006526,ENSOARG00000011352,ENSOARG00000021001,ENSOARG00000011128,ENSOARG00000005434,ENSOARG0…
GO:0044700	single organism signaling	biological_process	1.162e-23	1.9017e-20	278	677	4526	19130	235	ENSOARG00000017205,ENSOARG00000009653,ENSOARG00000014623,ENSOARG00000006353,ENSOARG00000014023,ENSOARG00000018510,ENSOARG00000019324,ENSOARG00000007525,ENSOARG00000016109,ENSOARG00000012784,ENSOARG00000017034,ENSOARG00000013918,ENSOARG00000003994,ENSOARG00000005792,ENSOARG00000014236,ENSOARG00000002223,ENSOARG00000016042,ENSOARG00000009000,ENSOARG00000000158,ENSOARG00000020741,ENSOARG00000020622,…	43	ENSOARG00000000431,ENSOARG00000020763,ENSOARG00000008534,ENSOARG00000002366,ENSOARG00000008554,ENSOARG00000004871,ENSOARG00000016764,ENSOARG00000004414,ENSOARG00000001264,ENSOARG00000014425,ENSOARG00000013752,ENSOARG00000013151,ENSOARG00000011019,ENSOARG00000014433,ENSOARG00000017769,ENSOARG00000002386,ENSOARG00000012490,ENSOARG00000000417,ENSOARG00000011865,ENSOARG00000020186,ENSOARG00000015118,…
GO:0023052	signaling	biological_process	1.4827e-23	2.2243e-20	278	677	4532	19130	235	ENSOARG00000015180,ENSOARG00000015286,ENSOARG00000014774,ENSOARG00000012064,ENSOARG00000010521,ENSOARG00000009256,ENSOARG00000004086,ENSOARG00000009800,ENSOARG00000016115,ENSOARG00000021097,ENSOARG00000006760,ENSOARG00000016937,ENSOARG00000025194,ENSOARG00000007932,ENSOARG00000008285,ENSOARG00000003254,ENSOARG00000006813,ENSOARG00000007229,ENSOARG00000007984,ENSOARG00000005006,ENSOARG00000014582,…	43	ENSOARG00000014433,ENSOARG00000017769,ENSOARG00000012490,ENSOARG00000002386,ENSOARG00000000417,ENSOARG00000011865,ENSOARG00000013752,ENSOARG00000011019,ENSOARG00000013151,ENSOARG00000004871,ENSOARG00000016764,ENSOARG00000004414,ENSOARG00000001264,ENSOARG00000014425,ENSOARG00000000431,ENSOARG00000020763,ENSOARG00000008534,ENSOARG00000002366,ENSOARG00000008554,ENSOARG00000020287,ENSOARG00000016342,…
GO:0007154	cell communication	biological_process	7.384e-21	5.5386e-18	278	677	4714	19130	235	ENSOARG00000008380,ENSOARG00000009921,ENSOARG00000009399,ENSOARG00000015348,ENSOARG00000011171,ENSOARG00000018226,ENSOARG00000000123,ENSOARG00000003798,ENSOARG00000004983,ENSOARG00000010080,ENSOARG00000011110,ENSOARG00000016138,ENSOARG00000001397,ENSOARG00000020138,ENSOARG00000009791,ENSOARG00000003844,ENSOARG00000016622,ENSOARG00000011842,ENSOARG00000006421,ENSOARG00000011239,ENSOARG00000009130,…	43	ENSOARG00000016764,ENSOARG00000004414,ENSOARG00000001264,ENSOARG00000014425,ENSOARG00000004871,ENSOARG00000008534,ENSOARG00000002366,ENSOARG00000008554,ENSOARG00000000431,ENSOARG00000020763,ENSOARG00000012490,ENSOARG00000002386,ENSOARG00000000417,ENSOARG00000011865,ENSOARG00000014433,ENSOARG00000017769,ENSOARG00000011019,ENSOARG00000013151,ENSOARG00000013752,ENSOARG00000016285,ENSOARG00000017550,…
GO:0007165	signal transduction	biological_process	5.1399e-25	1.0281e-21	271	677	4277	19130	230	ENSOARG00000021097,ENSOARG00000016937,ENSOARG00000006760,ENSOARG00000025194,ENSOARG00000007932,ENSOARG00000008285,ENSOARG00000003254,ENSOARG00000006813,ENSOARG00000007229,ENSOARG00000007984,ENSOARG00000014582,ENSOARG00000005006,ENSOARG00000015180,ENSOARG00000015286,ENSOARG00000014774,ENSOARG00000012064,ENSOARG00000009256,ENSOARG00000004086,ENSOARG00000010521,ENSOARG00000009800,ENSOARG00000009999,…	41	ENSOARG00000011019,ENSOARG00000013151,ENSOARG00000013752,ENSOARG00000000417,ENSOARG00000011865,ENSOARG00000002386,ENSOARG00000017769,ENSOARG00000014433,ENSOARG00000008554,ENSOARG00000008534,ENSOARG00000002366,ENSOARG00000020763,ENSOARG00000000431,ENSOARG00000001264,ENSOARG00000014425,ENSOARG00000016764,ENSOARG00000004414,ENSOARG00000004871,ENSOARG00000019817,ENSOARG00000002260,ENSOARG00000021060,…
GO:0032501	multicellular organismal process	biological_process	4.04e-14	1.3468e-11	269	677	5011	19130	213	ENSOARG00000006421,ENSOARG00000011239,ENSOARG00000000405,ENSOARG00000017214,ENSOARG00000013509,ENSOARG00000013482,ENSOARG00000009172,ENSOARG00000009827,ENSOARG00000008232,ENSOARG00000020959,ENSOARG00000017892,ENSOARG00000005167,ENSOARG00000001094,ENSOARG00000011171,ENSOARG00000018226,ENSOARG00000017265,ENSOARG00000000123,ENSOARG00000003798,ENSOARG00000008908,ENSOARG00000002263,ENSOARG00000020138,…	56	ENSOARG00000006034,ENSOARG00000014723,ENSOARG00000014425,ENSOARG00000004414,ENSOARG00000016764,ENSOARG00000017168,ENSOARG00000020376,ENSOARG00000001159,ENSOARG00000004871,ENSOARG00000020519,ENSOARG00000015715,ENSOARG00000002366,ENSOARG00000008534,ENSOARG00000011865,ENSOARG00000000417,ENSOARG00000002386,ENSOARG00000012490,ENSOARG00000001487,ENSOARG00000014433,ENSOARG00000017769,Novel02176,ENSOARG0…
GO:0044707	single-multicellular organism process	biological_process	9.3217e-16	3.648e-13	267	677	4817	19130	211	ENSOARG00000004787,ENSOARG00000014898,ENSOARG00000001783,ENSOARG00000020734,ENSOARG00000005007,ENSOARG00000008480,ENSOARG00000014103,ENSOARG00000016922,ENSOARG00000012360,ENSOARG00000015727,ENSOARG00000015592,ENSOARG00000001980,ENSOARG00000007991,ENSOARG00000012515,ENSOARG00000001060,ENSOARG00000021005,ENSOARG00000001968,ENSOARG00000013157,ENSOARG00000005236,ENSOARG00000016798,ENSOARG00000010199,…	56	ENSOARG00000009675,Novel00471,ENSOARG00000003149,ENSOARG00000002260,ENSOARG00000011128,ENSOARG00000012314,ENSOARG00000005434,ENSOARG00000021001,ENSOARG00000017394,ENSOARG00000004312,ENSOARG00000007493,ENSOARG00000006526,ENSOARG00000017973,ENSOARG00000006378,ENSOARG00000016342,ENSOARG00000016363,ENSOARG00000006212,ENSOARG00000017474,ENSOARG00000020186,ENSOARG00000015118,ENSOARG00000016285,ENSOARG0…
GO:0048518	positive regulation of biological process	biological_process	1.5367e-19	1.0246e-16	238	677	3792	19130	195	ENSOARG00000015215,ENSOARG00000020030,ENSOARG00000019876,ENSOARG00000001574,ENSOARG00000008715,ENSOARG00000017093,ENSOARG00000010199,ENSOARG00000021005,ENSOARG00000007252,ENSOARG00000001060,ENSOARG00000013157,ENSOARG00000015727,ENSOARG00000012360,ENSOARG00000015592,ENSOARG00000020734,ENSOARG00000014103,ENSOARG00000016922,ENSOARG00000008480,ENSOARG00000001783,ENSOARG00000004787,ENSOARG00000020233,…	43	ENSOARG00000014425,ENSOARG00000014723,ENSOARG00000006034,ENSOARG00000004414,ENSOARG00000016764,ENSOARG00000004871,ENSOARG00000008554,ENSOARG00000002366,ENSOARG00000008534,ENSOARG00000011865,ENSOARG00000000417,ENSOARG00000012178,ENSOARG00000012490,ENSOARG00000000322,ENSOARG00000017769,ENSOARG00000017964,ENSOARG00000013151,ENSOARG00000011019,ENSOARG00000013752,ENSOARG00000012667,ENSOARG00000016285,…
GO:0032502	developmental process	biological_process	1.089e-16	4.4555e-14	237	677	3950	19130	186	ENSOARG00000003844,ENSOARG00000016622,ENSOARG00000012131,ENSOARG00000002263,ENSOARG00000015578,ENSOARG00000010080,ENSOARG00000020138,ENSOARG00000003798,ENSOARG00000000123,ENSOARG00000018226,ENSOARG00000011171,ENSOARG00000020959,ENSOARG00000001094,ENSOARG00000005167,ENSOARG00000009827,ENSOARG00000009172,ENSOARG00000013482,ENSOARG00000011239,ENSOARG00000006421,ENSOARG00000017214,ENSOARG00000000405,…	51	ENSOARG00000012667,ENSOARG00000016285,ENSOARG00000019395,ENSOARG00000005781,ENSOARG00000011464,ENSOARG00000002449,ENSOARG00000006212,ENSOARG00000016363,ENSOARG00000002555,ENSOARG00000017474,ENSOARG00000015118,ENSOARG00000006526,ENSOARG00000016342,ENSOARG00000006378,ENSOARG00000003149,ENSOARG00000002260,ENSOARG00000009675,Novel00471,ENSOARG00000017394,ENSOARG00000004312,ENSOARG00000007493,ENSOARG0…
GO:0044767	single-organism developmental process	biological_process	9.5765e-17	4.0092e-14	236	677	3921	19130	186	ENSOARG00000019463,ENSOARG00000001138,ENSOARG00000009653,ENSOARG00000000058,ENSOARG00000006353,ENSOARG00000014623,ENSOARG00000020233,ENSOARG00000011756,ENSOARG00000007525,ENSOARG00000019324,ENSOARG00000017875,ENSOARG00000014361,ENSOARG00000016271,ENSOARG00000020622,ENSOARG00000002223,ENSOARG00000016042,ENSOARG00000009000,ENSOARG00000000158,ENSOARG00000011235,ENSOARG00000012392,ENSOARG00000010493,…	50	ENSOARG00000017964,ENSOARG00000011056,ENSOARG00000011019,ENSOARG00000000620,ENSOARG00000013151,ENSOARG00000004250,ENSOARG00000018650,ENSOARG00000019145,ENSOARG00000013752,ENSOARG00000011865,ENSOARG00000012490,ENSOARG00000001487,ENSOARG00000017769,ENSOARG00000015715,ENSOARG00000002366,ENSOARG00000008534,ENSOARG00000006034,ENSOARG00000014723,ENSOARG00000014425,ENSOARG00000004414,ENSOARG00000016764,…
GO:0019222	regulation of metabolic process	biological_process	3.1314e-10	4.7532e-08	236	677	4559	19130	185	ENSOARG00000002307,ENSOARG00000015144,ENSOARG00000017420,ENSOARG00000013317,ENSOARG00000011380,ENSOARG00000001568,ENSOARG00000010664,ENSOARG00000020968,ENSOARG00000019663,ENSOARG00000009234,ENSOARG00000009341,ENSOARG00000014926,ENSOARG00000012299,ENSOARG00000015718,ENSOARG00000001254,ENSOARG00000018039,ENSOARG00000020889,ENSOARG00000018337,ENSOARG00000006538,ENSOARG00000013173,ENSOARG00000003908,…	51	ENSOARG00000017964,ENSOARG00000011056,ENSOARG00000011019,ENSOARG00000013151,Novel00191,ENSOARG00000014590,ENSOARG00000013752,Novel00685,ENSOARG00000011865,ENSOARG00000000417,ENSOARG00000002386,ENSOARG00000001487,ENSOARG00000018980,ENSOARG00000017769,ENSOARG00000008554,Novel01871,ENSOARG00000002366,Novel01381,ENSOARG00000016352,ENSOARG00000006034,ENSOARG00000004414,ENSOARG00000020376,ENSOARG000000…
GO:0048856	anatomical structure development	biological_process	1.0893e-15	4.1722e-13	220	677	3635	19130	172	ENSOARG00000012360,ENSOARG00000015592,ENSOARG00000001968,ENSOARG00000001060,ENSOARG00000007991,ENSOARG00000012515,ENSOARG00000004787,ENSOARG00000005007,ENSOARG00000020734,ENSOARG00000016922,ENSOARG00000014103,ENSOARG00000016505,ENSOARG00000008480,ENSOARG00000009972,ENSOARG00000014898,ENSOARG00000001783,ENSOARG00000010473,ENSOARG00000010199,ENSOARG00000016798,ENSOARG00000001574,ENSOARG00000017093,…	48	ENSOARG00000017769,ENSOARG00000001487,ENSOARG00000000322,ENSOARG00000012490,ENSOARG00000011865,ENSOARG00000019145,ENSOARG00000013752,ENSOARG00000013151,ENSOARG00000000620,ENSOARG00000011019,ENSOARG00000018650,ENSOARG00000017964,ENSOARG00000011056,ENSOARG00000001159,ENSOARG00000004871,ENSOARG00000017168,ENSOARG00000020376,ENSOARG00000004414,ENSOARG00000016764,ENSOARG00000014723,ENSOARG00000014425,…
GO:0048522	positive regulation of cellular process	biological_process	3.4032e-18	1.9145e-15	212	677	3316	19130	169	ENSOARG00000004208,ENSOARG00000016334,ENSOARG00000008705,ENSOARG00000014750,ENSOARG00000009401,ENSOARG00000017631,ENSOARG00000011768,ENSOARG00000015044,ENSOARG00000010543,ENSOARG00000001158,ENSOARG00000014822,ENSOARG00000011146,ENSOARG00000020249,ENSOARG00000009599,ENSOARG00000006007,ENSOARG00000003028,ENSOARG00000013646,ENSOARG00000019067,ENSOARG00000010939,ENSOARG00000008984,ENSOARG00000003604,…	43	ENSOARG00000005434,ENSOARG00000012314,ENSOARG00000013010,ENSOARG00000021001,ENSOARG00000004314,ENSOARG00000009675,ENSOARG00000019817,ENSOARG00000002260,ENSOARG00000020287,ENSOARG00000019235,ENSOARG00000016342,ENSOARG00000006378,ENSOARG00000008521,ENSOARG00000011352,ENSOARG00000006526,ENSOARG00000015118,ENSOARG00000016363,ENSOARG00000006212,ENSOARG00000017474,ENSOARG00000000450,ENSOARG00000011464,…
GO:0007275	multicellular organismal development	biological_process	3.7499e-17	1.7309e-14	208	677	3258	19130	161	ENSOARG00000016271,ENSOARG00000014361,ENSOARG00000017875,ENSOARG00000009000,ENSOARG00000016042,ENSOARG00000000158,ENSOARG00000011235,ENSOARG00000005711,ENSOARG00000010493,ENSOARG00000000058,ENSOARG00000001138,ENSOARG00000014623,ENSOARG00000006353,ENSOARG00000019324,ENSOARG00000007525,ENSOARG00000020233,ENSOARG00000004787,ENSOARG00000014898,ENSOARG00000001783,ENSOARG00000020734,ENSOARG00000005007,…	47	ENSOARG00000013752,ENSOARG00000000620,ENSOARG00000013151,ENSOARG00000018650,ENSOARG00000011019,ENSOARG00000017964,ENSOARG00000011056,ENSOARG00000017769,ENSOARG00000001487,ENSOARG00000012490,ENSOARG00000011865,ENSOARG00000002366,ENSOARG00000008534,ENSOARG00000015715,ENSOARG00000001159,ENSOARG00000004871,ENSOARG00000017168,ENSOARG00000020376,ENSOARG00000004414,ENSOARG00000016764,ENSOARG00000014425,…
GO:0031323	regulation of cellular metabolic process	biological_process	1.0538e-07	1.0481e-05	200	677	3990	19130	154	ENSOARG00000001094,ENSOARG00000017892,ENSOARG00000017214,ENSOARG00000000405,ENSOARG00000012344,ENSOARG00000006421,ENSOARG00000009172,ENSOARG00000008232,ENSOARG00000013482,ENSOARG00000020138,ENSOARG00000002263,ENSOARG00000012131,ENSOARG00000003844,ENSOARG00000002811,ENSOARG00000016622,ENSOARG00000017265,ENSOARG00000012461,ENSOARG00000008908,ENSOARG00000003798,ENSOARG00000009957,ENSOARG00000010448,…	46	ENSOARG00000016363,ENSOARG00000017474,ENSOARG00000005781,ENSOARG00000000450,ENSOARG00000001504,ENSOARG00000012667,ENSOARG00000016285,ENSOARG00000019395,ENSOARG00000007493,ENSOARG00000012314,ENSOARG00000005434,ENSOARG00000011128,ENSOARG00000021001,ENSOARG00000019817,ENSOARG00000002260,ENSOARG00000021060,ENSOARG00000009675,ENSOARG00000020287,ENSOARG00000006378,ENSOARG00000016342,ENSOARG00000019235,…
GO:0080090	regulation of primary metabolic process	biological_process	8.0243e-08	8.1612e-06	198	677	3923	19130	151	ENSOARG00000001783,ENSOARG00000008480,ENSOARG00000016922,ENSOARG00000004787,ENSOARG00000001060,ENSOARG00000013157,ENSOARG00000012360,ENSOARG00000015727,ENSOARG00000015592,ENSOARG00000001980,ENSOARG00000001574,ENSOARG00000007134,ENSOARG00000017093,ENSOARG00000021090,ENSOARG00000015723,Novel02027,ENSOARG00000003963,ENSOARG00000009084,ENSOARG00000020030,ENSOARG00000005792,ENSOARG00000020741,ENSOARG0…	47	ENSOARG00000005781,ENSOARG00000001504,ENSOARG00000000450,ENSOARG00000012667,ENSOARG00000019395,ENSOARG00000016285,ENSOARG00000002555,ENSOARG00000017474,ENSOARG00000016363,ENSOARG00000016342,ENSOARG00000019235,ENSOARG00000006378,ENSOARG00000020287,ENSOARG00000006526,ENSOARG00000011352,ENSOARG00000008521,ENSOARG00000007493,ENSOARG00000021001,ENSOARG00000012314,ENSOARG00000011128,ENSOARG00000005434,…
GO:0048731	system development	biological_process	2.3732e-17	1.1546e-14	197	677	3009	19130	153	ENSOARG00000013317,ENSOARG00000011660,ENSOARG00000017420,ENSOARG00000002307,ENSOARG00000017807,ENSOARG00000005579,ENSOARG00000005365,ENSOARG00000020968,ENSOARG00000019663,ENSOARG00000009341,ENSOARG00000002475,ENSOARG00000009234,ENSOARG00000020889,ENSOARG00000018039,ENSOARG00000004015,ENSOARG00000008208,ENSOARG00000015718,ENSOARG00000008091,ENSOARG00000002960,ENSOARG00000008349,ENSOARG00000021018,…	44	ENSOARG00000021001,ENSOARG00000012314,ENSOARG00000011128,ENSOARG00000005434,ENSOARG00000007493,ENSOARG00000004312,ENSOARG00000009675,ENSOARG00000002260,ENSOARG00000003149,ENSOARG00000016342,ENSOARG00000006378,ENSOARG00000006526,ENSOARG00000015118,ENSOARG00000017474,ENSOARG00000006212,ENSOARG00000016363,ENSOARG00000002449,ENSOARG00000011464,ENSOARG00000005781,ENSOARG00000019395,ENSOARG00000016285,…
GO:0060255	regulation of macromolecule metabolic process	biological_process	3.1147e-07	2.8754e-05	197	677	3964	19130	152	ENSOARG00000012362,ENSOARG00000012131,ENSOARG00000003844,ENSOARG00000002811,ENSOARG00000016622,ENSOARG00000020138,ENSOARG00000008908,ENSOARG00000003798,ENSOARG00000017265,ENSOARG00000001094,ENSOARG00000017892,ENSOARG00000013482,ENSOARG00000009172,ENSOARG00000017214,ENSOARG00000000405,ENSOARG00000012344,ENSOARG00000011239,ENSOARG00000006421,ENSOARG00000009058,ENSOARG00000004484,ENSOARG00000014188,…	45	ENSOARG00000001504,ENSOARG00000000450,ENSOARG00000005781,ENSOARG00000019395,ENSOARG00000016285,ENSOARG00000012667,ENSOARG00000017474,ENSOARG00000016363,ENSOARG00000016342,ENSOARG00000006378,ENSOARG00000020287,ENSOARG00000008521,ENSOARG00000006526,ENSOARG00000011352,ENSOARG00000021001,ENSOARG00000011128,ENSOARG00000012314,ENSOARG00000005434,ENSOARG00000007493,ENSOARG00000009675,ENSOARG00000021060,…
GO:0048519	negative regulation of biological process	biological_process	1.3628e-12	3.5554e-10	188	677	3203	19130	156	ENSOARG00000005322,ENSOARG00000019670,ENSOARG00000008984,ENSOARG00000006737,ENSOARG00000003604,ENSOARG00000010939,ENSOARG00000000950,ENSOARG00000014822,ENSOARG00000011146,ENSOARG00000020676,ENSOARG00000006007,ENSOARG00000008473,ENSOARG00000015044,ENSOARG00000002790,ENSOARG00000017631,ENSOARG00000009401,ENSOARG00000011437,ENSOARG00000005846,ENSOARG00000016334,ENSOARG00000004208,ENSOARG00000001568,…	32	ENSOARG00000002366,ENSOARG00000008554,ENSOARG00000004871,ENSOARG00000020519,ENSOARG00000020376,ENSOARG00000016764,ENSOARG00000004414,ENSOARG00000006034,ENSOARG00000014723,ENSOARG00000014425,ENSOARG00000013752,ENSOARG00000014590,ENSOARG00000004250,ENSOARG00000013151,ENSOARG00000011019,ENSOARG00000017964,ENSOARG00000017769,ENSOARG00000001487,ENSOARG00000002386,ENSOARG00000014824,ENSOARG00000011865,…
GO:0048583	regulation of response to stimulus	biological_process	9.3022e-23	1.1961e-19	182	677	2409	19130	155	ENSOARG00000008984,ENSOARG00000008001,ENSOARG00000019067,ENSOARG00000013646,ENSOARG00000010939,ENSOARG00000008473,ENSOARG00000006007,ENSOARG00000000950,ENSOARG00000011146,ENSOARG00000001158,ENSOARG00000002790,ENSOARG00000010543,ENSOARG00000015044,ENSOARG00000016790,ENSOARG00000017631,ENSOARG00000009401,ENSOARG00000005846,ENSOARG00000011437,ENSOARG00000020214,ENSOARG00000004208,ENSOARG00000017420,…	27	ENSOARG00000020287,ENSOARG00000006378,Novel02176,ENSOARG00000000417,ENSOARG00000011352,ENSOARG00000011865,ENSOARG00000006526,ENSOARG00000014824,ENSOARG00000008521,ENSOARG00000002386,ENSOARG00000004314,ENSOARG00000004312,ENSOARG00000013752,ENSOARG00000011128,ENSOARG00000005434,ENSOARG00000021001,ENSOARG00000002260,ENSOARG00000013151,ENSOARG00000011019,ENSOARG00000020519,ENSOARG00000004871,ENSOARG0…
GO:0048523	negative regulation of cellular process	biological_process	3.2945e-11	6.3094e-09	172	677	2955	19130	141	ENSOARG00000010664,ENSOARG00000005365,ENSOARG00000017420,ENSOARG00000002307,ENSOARG00000001568,ENSOARG00000014214,ENSOARG00000007690,ENSOARG00000018337,ENSOARG00000020889,ENSOARG00000018039,ENSOARG00000012299,ENSOARG00000015718,ENSOARG00000008349,ENSOARG00000013173,ENSOARG00000007234,ENSOARG00000019663,ENSOARG00000020475,ENSOARG00000009341,ENSOARG00000009234,ENSOARG00000000950,ENSOARG00000011146,…	31	ENSOARG00000006526,ENSOARG00000011865,ENSOARG00000002386,ENSOARG00000001487,ENSOARG00000006378,ENSOARG00000019235,ENSOARG00000017769,ENSOARG00000019817,ENSOARG00000017964,ENSOARG00000002260,ENSOARG00000013151,ENSOARG00000011019,ENSOARG00000004250,ENSOARG00000007493,ENSOARG00000014590,ENSOARG00000013752,ENSOARG00000012314,ENSOARG00000012667,ENSOARG00000014723,ENSOARG00000006034,ENSOARG00000014425,…
GO:0048869	cellular developmental process	biological_process	6.5952e-12	1.4304e-09	166	677	2717	19130	137	ENSOARG00000016857,ENSOARG00000020968,ENSOARG00000007452,ENSOARG00000019663,ENSOARG00000002960,ENSOARG00000008349,ENSOARG00000008091,ENSOARG00000015718,ENSOARG00000008208,ENSOARG00000018039,ENSOARG00000020889,ENSOARG00000007690,ENSOARG00000011380,ENSOARG00000017420,ENSOARG00000013317,ENSOARG00000005365,ENSOARG00000005579,ENSOARG00000016642,ENSOARG00000002790,ENSOARG00000010543,ENSOARG00000016790,…	29	ENSOARG00000006212,ENSOARG00000002555,ENSOARG00000002366,ENSOARG00000015118,ENSOARG00000006034,ENSOARG00000014723,ENSOARG00000014425,ENSOARG00000016285,ENSOARG00000016764,ENSOARG00000004414,ENSOARG00000017168,ENSOARG00000004871,ENSOARG00000011464,ENSOARG00000001159,ENSOARG00000011056,ENSOARG00000003149,ENSOARG00000017964,ENSOARG00000002260,ENSOARG00000004250,ENSOARG00000011019,ENSOARG00000019145,…
GO:0048513	organ development	biological_process	5.5729e-18	3.0401e-15	165	677	2310	19130	126	ENSOARG00000005322,ENSOARG00000010080,ENSOARG00000008984,ENSOARG00000003844,ENSOARG00000016622,ENSOARG00000010939,ENSOARG00000012131,ENSOARG00000013646,ENSOARG00000019067,ENSOARG00000003028,ENSOARG00000011171,ENSOARG00000006007,ENSOARG00000009599,ENSOARG00000003798,ENSOARG00000003422,ENSOARG00000011146,ENSOARG00000014822,ENSOARG00000002790,ENSOARG00000010543,ENSOARG00000016790,ENSOARG00000020959,…	39	ENSOARG00000007493,ENSOARG00000004312,ENSOARG00000012314,ENSOARG00000011128,ENSOARG00000005434,ENSOARG00000021001,ENSOARG00000002260,ENSOARG00000009675,ENSOARG00000016342,ENSOARG00000006378,ENSOARG00000015118,ENSOARG00000016363,ENSOARG00000017474,ENSOARG00000005781,ENSOARG00000002449,ENSOARG00000012667,ENSOARG00000016285,ENSOARG00000019395,ENSOARG00000013752,ENSOARG00000011056,ENSOARG00000017964,…
GO:0030154	cell differentiation	biological_process	2.2352e-13	6.5963e-11	160	677	2484	19130	131	ENSOARG00000004797,ENSOARG00000006068,ENSOARG00000016193,ENSOARG00000004812,ENSOARG00000012355,ENSOARG00000002144,ENSOARG00000018189,ENSOARG00000016306,ENSOARG00000009999,ENSOARG00000008507,ENSOARG00000006358,ENSOARG00000016017,ENSOARG00000012532,ENSOARG00000015236,ENSOARG00000004403,ENSOARG00000015286,ENSOARG00000015379,ENSOARG00000014774,ENSOARG00000018838,ENSOARG00000008340,ENSOARG00000015180,…	29	ENSOARG00000015118,ENSOARG00000002555,ENSOARG00000006212,ENSOARG00000002366,ENSOARG00000017168,ENSOARG00000001159,ENSOARG00000011464,ENSOARG00000004871,ENSOARG00000014723,ENSOARG00000014425,ENSOARG00000006034,ENSOARG00000004414,ENSOARG00000016285,ENSOARG00000016764,ENSOARG00000013752,ENSOARG00000019145,ENSOARG00000012314,ENSOARG00000017964,ENSOARG00000002260,ENSOARG00000003149,ENSOARG00000011056,…
GO:0002376	immune system process	biological_process	2.8425e-37	5.117e-33	159	677	1506	19130	146	ENSOARG00000012064,ENSOARG00000008340,ENSOARG00000007906,ENSOARG00000009800,ENSOARG00000010521,ENSOARG00000007932,ENSOARG00000003782,ENSOARG00000014582,ENSOARG00000007229,ENSOARG00000006813,ENSOARG00000003254,ENSOARG00000008285,ENSOARG00000015177,ENSOARG00000006068,ENSOARG00000016193,ENSOARG00000015970,ENSOARG00000020667,ENSOARG00000018775,ENSOARG00000016610,ENSOARG00000008526,ENSOARG00000020861,…	13	ENSOARG00000013151,ENSOARG00000011019,ENSOARG00000021001,ENSOARG00000000417,ENSOARG00000011865,ENSOARG00000014723,Novel01912,ENSOARG00000014425,ENSOARG00000016285,ENSOARG00000004414,ENSOARG00000000450,ENSOARG00000017973,ENSOARG00000017769
GO:0007166	cell surface receptor signaling pathway	biological_process	8.764e-29	7.8885e-25	148	677	1526	19130	126	ENSOARG00000009921,ENSOARG00000011171,ENSOARG00000002808,ENSOARG00000000123,ENSOARG00000006007,ENSOARG00000011146,ENSOARG00000004983,ENSOARG00000003604,ENSOARG00000020138,ENSOARG00000008984,ENSOARG00000001397,ENSOARG00000010080,ENSOARG00000010631,ENSOARG00000003908,ENSOARG00000016622,ENSOARG00000010939,ENSOARG00000013646,ENSOARG00000019067,ENSOARG00000012367,ENSOARG00000013529,ENSOARG00000006421,…	22	ENSOARG00000004871,ENSOARG00000001504,ENSOARG00000004617,ENSOARG00000016285,ENSOARG00000016764,ENSOARG00000004414,ENSOARG00000020186,ENSOARG00000008534,ENSOARG00000016766,ENSOARG00000014433,ENSOARG00000017769,ENSOARG00000020287,ENSOARG00000006378,ENSOARG00000011352,ENSOARG00000011865,ENSOARG00000006526,ENSOARG00000005434,ENSOARG00000021001,ENSOARG00000013752,ENSOARG00000004314,ENSOARG00000011019,…
GO:0009893	positive regulation of metabolic process	biological_process	6.8628e-11	1.1832e-08	146	677	2369	19130	117	ENSOARG00000019067,ENSOARG00000012131,ENSOARG00000010939,ENSOARG00000003844,ENSOARG00000020138,ENSOARG00000008984,ENSOARG00000004983,ENSOARG00000011146,ENSOARG00000014822,ENSOARG00000008908,ENSOARG00000003798,ENSOARG00000017265,ENSOARG00000011171,ENSOARG00000003028,ENSOARG00000017631,ENSOARG00000001094,ENSOARG00000017892,ENSOARG00000011768,ENSOARG00000010543,ENSOARG00000008161,ENSOARG00000015044,…	29	ENSOARG00000002366,ENSOARG00000017474,ENSOARG00000016363,ENSOARG00000004414,ENSOARG00000016285,ENSOARG00000006034,ENSOARG00000012667,ENSOARG00000001504,ENSOARG00000000450,ENSOARG00000004871,ENSOARG00000013151,ENSOARG00000011019,ENSOARG00000009675,ENSOARG00000002260,ENSOARG00000019817,ENSOARG00000021001,ENSOARG00000012314,ENSOARG00000005434,ENSOARG00000013752,ENSOARG00000008521,ENSOARG00000006526,…
GO:0042221	response to chemical	biological_process	5.9833e-10	8.617e-08	146	677	2550	19130	112	ENSOARG00000006007,ENSOARG00000000123,ENSOARG00000020676,ENSOARG00000011146,ENSOARG00000003028,ENSOARG00000012461,ENSOARG00000017265,ENSOARG00000003844,ENSOARG00000003908,ENSOARG00000012367,ENSOARG00000010939,ENSOARG00000019067,ENSOARG00000004983,ENSOARG00000003604,ENSOARG00000010080,ENSOARG00000020138,ENSOARG00000013509,ENSOARG00000009932,ENSOARG00000006421,ENSOARG00000011239,ENSOARG00000017214,…	34	ENSOARG00000015118,ENSOARG00000017474,ENSOARG00000016766,ENSOARG00000017468,ENSOARG00000018548,ENSOARG00000000450,ENSOARG00000001504,ENSOARG00000002449,ENSOARG00000016285,ENSOARG00000011128,ENSOARG00000021001,ENSOARG00000003149,ENSOARG00000019817,ENSOARG00000021060,ENSOARG00000017973,ENSOARG00000004088,ENSOARG00000006526,ENSOARG00000020763,ENSOARG00000008554,ENSOARG00000002366,ENSOARG00000017168,…
GO:0051239	regulation of multicellular organismal process	biological_process	9.678e-19	5.8074e-16	142	677	1821	19130	115	ENSOARG00000011738,ENSOARG00000007991,ENSOARG00000013157,ENSOARG00000005236,ENSOARG00000021005,ENSOARG00000001060,ENSOARG00000002144,ENSOARG00000015592,ENSOARG00000015727,ENSOARG00000013669,ENSOARG00000018775,ENSOARG00000001980,ENSOARG00000001783,ENSOARG00000004797,ENSOARG00000014103,ENSOARG00000016193,ENSOARG00000016922,ENSOARG00000006068,ENSOARG00000004787,ENSOARG00000006358,ENSOARG00000016017,…	27	ENSOARG00000021001,ENSOARG00000004312,ENSOARG00000013752,ENSOARG00000013151,ENSOARG00000011019,ENSOARG00000011056,ENSOARG00000017964,ENSOARG00000017769,Novel02176,ENSOARG00000001487,ENSOARG00000016342,ENSOARG00000006378,ENSOARG00000002386,ENSOARG00000000417,ENSOARG00000011865,ENSOARG00000015118,ENSOARG00000002366,ENSOARG00000006212,ENSOARG00000017474,ENSOARG00000004871,ENSOARG00000020519,ENSOARG0…
GO:0023051	regulation of signaling	biological_process	8.8476e-14	2.7461e-11	138	677	2001	19130	116	ENSOARG00000012180,ENSOARG00000014188,ENSOARG00000004484,ENSOARG00000002307,ENSOARG00000008249,ENSOARG00000017420,ENSOARG00000002039,ENSOARG00000006301,ENSOARG00000020050,ENSOARG00000014463,ENSOARG00000017465,ENSOARG00000004499,ENSOARG00000020761,ENSOARG00000010664,ENSOARG00000015037,ENSOARG00000017562,ENSOARG00000009341,ENSOARG00000020968,ENSOARG00000010448,ENSOARG00000007234,ENSOARG00000019218,…	22	ENSOARG00000002260,ENSOARG00000011019,ENSOARG00000013151,ENSOARG00000004314,ENSOARG00000013752,ENSOARG00000011128,ENSOARG00000005434,ENSOARG00000011352,ENSOARG00000000417,ENSOARG00000011865,ENSOARG00000012490,ENSOARG00000002386,ENSOARG00000008521,ENSOARG00000020287,ENSOARG00000006378,ENSOARG00000008534,ENSOARG00000015118,ENSOARG00000016764,ENSOARG00000016285,ENSOARG00000000450,ENSOARG00000004871,…
GO:0010646	regulation of cell communication	biological_process	4.3497e-13	1.2235e-10	138	677	2042	19130	116	ENSOARG00000012180,ENSOARG00000004484,ENSOARG00000014188,ENSOARG00000002307,ENSOARG00000008249,ENSOARG00000017420,ENSOARG00000014463,ENSOARG00000017465,ENSOARG00000002039,ENSOARG00000020050,ENSOARG00000006301,ENSOARG00000015037,ENSOARG00000017562,ENSOARG00000004499,ENSOARG00000010664,ENSOARG00000020761,ENSOARG00000009341,ENSOARG00000020968,ENSOARG00000010448,ENSOARG00000007234,ENSOARG00000019218,…	22	ENSOARG00000011865,ENSOARG00000000417,ENSOARG00000011352,ENSOARG00000012490,ENSOARG00000002386,ENSOARG00000008521,ENSOARG00000006378,ENSOARG00000020287,ENSOARG00000002260,ENSOARG00000011019,ENSOARG00000013151,ENSOARG00000004314,ENSOARG00000013752,ENSOARG00000005434,ENSOARG00000011128,ENSOARG00000016285,ENSOARG00000016764,ENSOARG00000001504,ENSOARG00000004871,ENSOARG00000000450,ENSOARG00000008534,…
GO:0009889	regulation of biosynthetic process	biological_process	0.00018181	0.0071461	135	677	2765	19130	97	ENSOARG00000020050,ENSOARG00000021177,ENSOARG00000020885,ENSOARG00000014463,ENSOARG00000004499,ENSOARG00000007763,ENSOARG00000017562,ENSOARG00000015037,ENSOARG00000014188,ENSOARG00000004484,ENSOARG00000017420,ENSOARG00000009058,ENSOARG00000017199,ENSOARG00000013317,ENSOARG00000013176,ENSOARG00000018039,ENSOARG00000002053,ENSOARG00000012299,ENSOARG00000016047,ENSOARG00000006553,ENSOARG00000020889,…	38	ENSOARG00000017474,ENSOARG00000016363,ENSOARG00000019395,ENSOARG00000016285,ENSOARG00000012667,ENSOARG00000001504,ENSOARG00000005781,ENSOARG00000009675,ENSOARG00000021060,ENSOARG00000002260,ENSOARG00000019817,ENSOARG00000021001,ENSOARG00000005434,ENSOARG00000012314,ENSOARG00000006526,ENSOARG00000006378,ENSOARG00000016342,ENSOARG00000019235,Novel01871,ENSOARG00000002366,ENSOARG00000008554,ENSOARG0…
GO:0009653	anatomical structure morphogenesis	biological_process	2.7329e-12	6.5091e-10	133	677	1962	19130	101	ENSOARG00000006614,ENSOARG00000016857,ENSOARG00000019663,ENSOARG00000007452,ENSOARG00000002699,ENSOARG00000021018,ENSOARG00000008349,ENSOARG00000006538,ENSOARG00000013176,ENSOARG00000018039,ENSOARG00000004015,ENSOARG00000016047,ENSOARG00000002053,ENSOARG00000006553,ENSOARG00000020889,ENSOARG00000019503,ENSOARG00000012180,ENSOARG00000017420,ENSOARG00000008249,ENSOARG00000011660,ENSOARG00000013317,…	32	ENSOARG00000004871,ENSOARG00000001159,ENSOARG00000020376,ENSOARG00000016764,ENSOARG00000006034,ENSOARG00000014425,ENSOARG00000008534,ENSOARG00000002366,ENSOARG00000017769,ENSOARG00000000322,ENSOARG00000001487,ENSOARG00000011865,ENSOARG00000013752,ENSOARG00000013151,ENSOARG00000011056,ENSOARG00000017964,ENSOARG00000011464,ENSOARG00000002449,ENSOARG00000005781,ENSOARG00000019395,ENSOARG00000012667,…
GO:0031326	regulation of cellular biosynthetic process	biological_process	0.00025418	0.0095128	133	677	2737	19130	96	ENSOARG00000017199,ENSOARG00000013317,ENSOARG00000017420,ENSOARG00000009058,ENSOARG00000014188,ENSOARG00000004484,ENSOARG00000017562,ENSOARG00000007763,ENSOARG00000015037,ENSOARG00000004499,ENSOARG00000020885,ENSOARG00000014463,ENSOARG00000021177,ENSOARG00000020050,ENSOARG00000019663,ENSOARG00000006614,ENSOARG00000009341,ENSOARG00000014926,ENSOARG00000009234,ENSOARG00000009957,ENSOARG00000020889,…	37	ENSOARG00000005781,ENSOARG00000001504,ENSOARG00000012667,ENSOARG00000019395,ENSOARG00000016285,ENSOARG00000017474,ENSOARG00000016363,ENSOARG00000019235,ENSOARG00000016342,ENSOARG00000006378,ENSOARG00000006526,ENSOARG00000021001,ENSOARG00000012314,ENSOARG00000005434,ENSOARG00000002260,ENSOARG00000019817,ENSOARG00000009675,ENSOARG00000021060,ENSOARG00000020376,ENSOARG00000004871,ENSOARG00000006034,…
GO:0009966	regulation of signal transduction	biological_process	9.6659e-15	3.3463e-12	131	677	1800	19130	112	ENSOARG00000019347,ENSOARG00000004208,ENSOARG00000020214,ENSOARG00000011437,ENSOARG00000000405,ENSOARG00000005846,ENSOARG00000006421,ENSOARG00000001094,ENSOARG00000017631,ENSOARG00000010543,ENSOARG00000008161,ENSOARG00000015044,ENSOARG00000001158,ENSOARG00000002790,ENSOARG00000011146,ENSOARG00000006007,ENSOARG00000008473,ENSOARG00000000123,ENSOARG00000003798,ENSOARG00000019067,ENSOARG00000013646,…	19	ENSOARG00000006378,ENSOARG00000020287,ENSOARG00000011865,ENSOARG00000011352,ENSOARG00000000417,ENSOARG00000008521,ENSOARG00000002386,ENSOARG00000004314,ENSOARG00000013752,ENSOARG00000005434,ENSOARG00000011128,ENSOARG00000002260,ENSOARG00000011019,ENSOARG00000013151,ENSOARG00000000450,ENSOARG00000004871,ENSOARG00000016764,ENSOARG00000016285,ENSOARG00000008534
GO:0035556	intracellular signal transduction	biological_process	4.2666e-14	1.3965e-11	129	677	1801	19130	112	ENSOARG00000001158,ENSOARG00000010543,ENSOARG00000015044,ENSOARG00000008161,ENSOARG00000001094,ENSOARG00000017631,ENSOARG00000011842,ENSOARG00000014750,ENSOARG00000000405,ENSOARG00000016888,ENSOARG00000011437,ENSOARG00000020214,ENSOARG00000004208,ENSOARG00000008232,ENSOARG00000019347,ENSOARG00000004983,ENSOARG00000010631,ENSOARG00000020138,ENSOARG00000008984,ENSOARG00000003844,ENSOARG00000013646,…	17	ENSOARG00000008521,ENSOARG00000000417,ENSOARG00000011352,ENSOARG00000011865,ENSOARG00000020287,ENSOARG00000011019,ENSOARG00000013151,ENSOARG00000002260,ENSOARG00000011128,ENSOARG00000016285,ENSOARG00000014425,ENSOARG00000000450,Novel01864,ENSOARG00000002555,ENSOARG00000020186,ENSOARG00000000431,ENSOARG00000020763
GO:0034654	nucleobase-containing compound biosynthetic process	biological_process	0.0018994	0.048431	128	677	2763	19130	85	ENSOARG00000019067,ENSOARG00000012131,ENSOARG00000010939,ENSOARG00000003844,ENSOARG00000002811,ENSOARG00000003908,ENSOARG00000016622,ENSOARG00000010410,ENSOARG00000011146,ENSOARG00000014822,ENSOARG00000017265,ENSOARG00000001094,ENSOARG00000017631,ENSOARG00000015044,ENSOARG00000016334,ENSOARG00000009172,ENSOARG00000004208,ENSOARG00000013482,ENSOARG00000008232,ENSOARG00000017214,ENSOARG00000008705,…	43	ENSOARG00000011865,Novel00685,ENSOARG00000017769,ENSOARG00000010184,ENSOARG00000001487,ENSOARG00000011565,Novel00191,ENSOARG00000017964,ENSOARG00000011056,ENSOARG00000013752,ENSOARG00000014590,ENSOARG00000004414,ENSOARG00000006034,ENSOARG00000002033,ENSOARG00000004871,ENSOARG00000020376,ENSOARG00000002366,Novel01871,ENSOARG00000008554,ENSOARG00000000431,ENSOARG00000020763,ENSOARG00000016352,Novel…
GO:0006793	phosphorus metabolic process	biological_process	9.5249e-07	8.0125e-05	127	677	2295	19130	97	ENSOARG00000019663,ENSOARG00000020968,ENSOARG00000010448,ENSOARG00000007234,ENSOARG00000014926,ENSOARG00000003206,ENSOARG00000014631,ENSOARG00000019503,ENSOARG00000018039,ENSOARG00000015718,ENSOARG00000002053,ENSOARG00000016047,ENSOARG00000001254,ENSOARG00000016133,ENSOARG00000006538,ENSOARG00000017199,ENSOARG00000004484,ENSOARG00000014188,ENSOARG00000012180,ENSOARG00000014214,ENSOARG00000005746,…	30	ENSOARG00000000431,ENSOARG00000020186,ENSOARG00000020763,ENSOARG00000004502,ENSOARG00000008554,ENSOARG00000018548,ENSOARG00000016285,ENSOARG00000010787,ENSOARG00000014425,ENSOARG00000002033,ENSOARG00000013010,ENSOARG00000021001,ENSOARG00000011128,ENSOARG00000001516,ENSOARG00000013752,ENSOARG00000011019,ENSOARG00000002260,ENSOARG00000005646,ENSOARG00000004088,ENSOARG00000006378,ENSOARG00000017826,…
GO:0006796	phosphate-containing compound metabolic process	biological_process	9.4939e-07	8.0125e-05	126	677	2273	19130	97	ENSOARG00000003422,ENSOARG00000003798,ENSOARG00000011171,ENSOARG00000012367,ENSOARG00000013646,ENSOARG00000003844,ENSOARG00000002811,ENSOARG00000004010,ENSOARG00000019670,ENSOARG00000008984,ENSOARG00000002263,ENSOARG00000008232,ENSOARG00000020214,ENSOARG00000000405,ENSOARG00000012344,ENSOARG00000011437,ENSOARG00000014750,ENSOARG00000001094,ENSOARG00000012732,ENSOARG00000017631,ENSOARG00000015044,…	29	ENSOARG00000012490,ENSOARG00000008521,ENSOARG00000011352,ENSOARG00000006526,ENSOARG00000011865,ENSOARG00000014824,ENSOARG00000004088,ENSOARG00000005646,ENSOARG00000020287,ENSOARG00000018980,ENSOARG00000010184,ENSOARG00000017826,ENSOARG00000006378,ENSOARG00000011019,ENSOARG00000002260,ENSOARG00000011128,ENSOARG00000013010,ENSOARG00000021001,ENSOARG00000013752,ENSOARG00000001516,ENSOARG00000016285,…
GO:0019219	regulation of nucleobase-containing compound metabolic process	biological_process	0.0014382	0.03905	126	677	2678	19130	90	ENSOARG00000015044,ENSOARG00000017631,ENSOARG00000001094,ENSOARG00000008705,ENSOARG00000012344,ENSOARG00000017214,ENSOARG00000006421,ENSOARG00000009172,ENSOARG00000004208,ENSOARG00000013482,ENSOARG00000008232,ENSOARG00000016334,ENSOARG00000010410,ENSOARG00000019067,ENSOARG00000012131,ENSOARG00000010939,ENSOARG00000002811,ENSOARG00000003908,ENSOARG00000016622,ENSOARG00000003844,ENSOARG00000017265,…	36	ENSOARG00000016363,ENSOARG00000017474,ENSOARG00000001504,ENSOARG00000005781,ENSOARG00000016285,ENSOARG00000019395,ENSOARG00000012667,ENSOARG00000012314,ENSOARG00000005434,ENSOARG00000011128,ENSOARG00000021001,ENSOARG00000021060,ENSOARG00000009675,ENSOARG00000019817,ENSOARG00000002260,ENSOARG00000016342,ENSOARG00000006378,ENSOARG00000016352,Novel01381,ENSOARG00000002366,Novel01871,ENSOARG000000085…
GO:0031325	positive regulation of cellular metabolic process	biological_process	2.6501e-10	4.0775e-08	125	677	1974	19130	97	ENSOARG00000011738,ENSOARG00000001060,ENSOARG00000012360,ENSOARG00000015592,ENSOARG00000015727,ENSOARG00000008332,ENSOARG00000009682,ENSOARG00000001783,ENSOARG00000005926,ENSOARG00000004797,ENSOARG00000016193,ENSOARG00000008480,ENSOARG00000016922,ENSOARG00000006068,ENSOARG00000006358,ENSOARG00000016017,ENSOARG00000004403,ENSOARG00000014762,ENSOARG00000001574,ENSOARG00000009999,ENSOARG00000003112,…	28	ENSOARG00000002366,ENSOARG00000016363,ENSOARG00000017474,ENSOARG00000000450,ENSOARG00000004871,ENSOARG00000001504,ENSOARG00000016285,ENSOARG00000004414,ENSOARG00000012667,ENSOARG00000006034,ENSOARG00000005434,ENSOARG00000012314,ENSOARG00000021001,ENSOARG00000013752,ENSOARG00000009675,ENSOARG00000011019,ENSOARG00000019817,ENSOARG00000002260,ENSOARG00000017769,ENSOARG00000020287,ENSOARG00000016342,…
GO:0010556	regulation of macromolecule biosynthetic process	biological_process	0.0011376	0.03225	125	677	2638	19130	90	ENSOARG00000019663,ENSOARG00000006614,ENSOARG00000009341,ENSOARG00000009234,ENSOARG00000009957,ENSOARG00000006553,ENSOARG00000020889,ENSOARG00000019503,ENSOARG00000018039,ENSOARG00000016047,ENSOARG00000002053,ENSOARG00000012299,ENSOARG00000013176,ENSOARG00000013317,ENSOARG00000017420,ENSOARG00000009058,ENSOARG00000004484,ENSOARG00000014188,ENSOARG00000007763,ENSOARG00000017562,ENSOARG00000015037,…	35	ENSOARG00000001487,ENSOARG00000017769,Novel00685,ENSOARG00000011865,ENSOARG00000000417,ENSOARG00000014590,ENSOARG00000013752,ENSOARG00000017964,ENSOARG00000011056,Novel00191,ENSOARG00000020376,ENSOARG00000004871,ENSOARG00000006034,ENSOARG00000004414,Novel01381,ENSOARG00000016352,Novel01871,ENSOARG00000002366,ENSOARG00000006378,ENSOARG00000016342,ENSOARG00000006526,ENSOARG00000021001,ENSOARG000000…
GO:0009605	response to external stimulus	biological_process	8.9689e-22	8.4978e-19	124	677	1405	19130	102	ENSOARG00000005792,ENSOARG00000014236,ENSOARG00000015286,ENSOARG00000009000,ENSOARG00000012064,ENSOARG00000018838,ENSOARG00000021000,ENSOARG00000008340,ENSOARG00000014361,ENSOARG00000010493,ENSOARG00000013573,ENSOARG00000008057,ENSOARG00000010521,ENSOARG00000007944,ENSOARG00000009800,ENSOARG00000011235,ENSOARG00000007840,ENSOARG00000017205,ENSOARG00000007932,ENSOARG00000003782,ENSOARG00000006760,…	22	ENSOARG00000017474,ENSOARG00000015118,Novel01381,ENSOARG00000016285,ENSOARG00000014723,ENSOARG00000001504,ENSOARG00000004871,ENSOARG00000020519,ENSOARG00000000450,ENSOARG00000013151,ENSOARG00000003149,ENSOARG00000021001,ENSOARG00000011128,ENSOARG00000013752,ENSOARG00000002386,ENSOARG00000014824,ENSOARG00000011865,ENSOARG00000000417,ENSOARG00000011352,Novel02176,ENSOARG00000017769,ENSOARG000000014…
GO:0010604	positive regulation of macromolecule metabolic process	biological_process	1.0806e-09	1.485e-07	123	677	1972	19130	95	ENSOARG00000001060,ENSOARG00000011738,ENSOARG00000018775,ENSOARG00000012360,ENSOARG00000015592,ENSOARG00000015727,ENSOARG00000006068,ENSOARG00000008480,ENSOARG00000016193,ENSOARG00000016922,ENSOARG00000004797,ENSOARG00000005926,ENSOARG00000009682,ENSOARG00000001783,ENSOARG00000008332,ENSOARG00000016017,ENSOARG00000006358,ENSOARG00000004403,ENSOARG00000001574,ENSOARG00000014762,ENSOARG00000009999,…	28	ENSOARG00000012667,ENSOARG00000006034,ENSOARG00000016285,ENSOARG00000004414,ENSOARG00000000450,ENSOARG00000004871,ENSOARG00000001504,ENSOARG00000016363,ENSOARG00000017474,ENSOARG00000002366,ENSOARG00000011352,ENSOARG00000000417,ENSOARG00000011865,ENSOARG00000006526,ENSOARG00000008521,ENSOARG00000020287,ENSOARG00000016342,ENSOARG00000006378,ENSOARG00000017769,ENSOARG00000019817,ENSOARG00000002260,…
GO:2000112	regulation of cellular macromolecule biosynthetic process	biological_process	0.0016394	0.043431	121	677	2563	19130	86	ENSOARG00000017631,ENSOARG00000015044,ENSOARG00000016334,ENSOARG00000009172,ENSOARG00000004208,ENSOARG00000013482,ENSOARG00000017214,ENSOARG00000008705,ENSOARG00000012344,ENSOARG00000006421,ENSOARG00000010939,ENSOARG00000012131,ENSOARG00000019067,ENSOARG00000003844,ENSOARG00000003908,ENSOARG00000016622,ENSOARG00000002811,ENSOARG00000010410,ENSOARG00000014822,ENSOARG00000011146,ENSOARG00000017265,…	35	Novel00191,ENSOARG00000011056,ENSOARG00000017964,ENSOARG00000013752,ENSOARG00000014590,ENSOARG00000000417,ENSOARG00000011865,Novel00685,ENSOARG00000017769,ENSOARG00000001487,Novel01871,ENSOARG00000002366,Novel01381,ENSOARG00000016352,ENSOARG00000004414,ENSOARG00000006034,ENSOARG00000004871,ENSOARG00000020376,ENSOARG00000021060,ENSOARG00000009675,ENSOARG00000019817,ENSOARG00000002260,ENSOARG000000…
GO:0065009	regulation of molecular function	biological_process	3.2149e-11	6.2231e-09	118	677	1766	19130	102	ENSOARG00000012180,ENSOARG00000001568,ENSOARG00000004484,ENSOARG00000008262,ENSOARG00000015144,ENSOARG00000019971,ENSOARG00000007395,ENSOARG00000017465,ENSOARG00000016867,ENSOARG00000006301,ENSOARG00000020761,ENSOARG00000014926,ENSOARG00000019663,ENSOARG00000010448,ENSOARG00000016133,ENSOARG00000019218,ENSOARG00000013173,ENSOARG00000006538,ENSOARG00000002699,ENSOARG00000020889,ENSOARG00000019503,…	16	ENSOARG00000017474,ENSOARG00000000450,ENSOARG00000020519,ENSOARG00000016285,ENSOARG00000007493,ENSOARG00000013752,ENSOARG00000004312,ENSOARG00000011128,ENSOARG00000002260,ENSOARG00000019235,ENSOARG00000020287,ENSOARG00000011865,ENSOARG00000006526,ENSOARG00000000417,ENSOARG00000011352,ENSOARG00000008521
GO:0065008	regulation of biological quality	biological_process	1.2854e-05	0.00078906	118	677	2213	19130	96	ENSOARG00000015215,ENSOARG00000006358,ENSOARG00000010473,ENSOARG00000009999,ENSOARG00000005117,ENSOARG00000008715,ENSOARG00000015592,ENSOARG00000013669,ENSOARG00000012515,ENSOARG00000001060,ENSOARG00000003319,ENSOARG00000004787,ENSOARG00000021147,ENSOARG00000018528,ENSOARG00000009682,ENSOARG00000006068,ENSOARG00000015177,ENSOARG00000014103,ENSOARG00000008480,ENSOARG00000009972,ENSOARG00000006353,…	22	ENSOARG00000015118,ENSOARG00000002366,ENSOARG00000006212,ENSOARG00000017474,ENSOARG00000008554,ENSOARG00000020519,ENSOARG00000001504,ENSOARG00000016285,ENSOARG00000004414,ENSOARG00000014425,ENSOARG00000011128,ENSOARG00000020665,ENSOARG00000014590,ENSOARG00000004312,ENSOARG00000011056,Novel02176,ENSOARG00000017973,ENSOARG00000009194,ENSOARG00000006378,ENSOARG00000012490,ENSOARG00000002386,ENSOARG0…
GO:0006950	response to stress	biological_process	6.1257e-05	0.0029832	115	677	2238	19130	92	ENSOARG00000009999,ENSOARG00000010462,ENSOARG00000014085,ENSOARG00000005117,ENSOARG00000009686,ENSOARG00000014762,ENSOARG00000020861,ENSOARG00000008526,ENSOARG00000014277,ENSOARG00000008715,ENSOARG00000001574,Novel02027,ENSOARG00000019840,ENSOARG00000020030,ENSOARG00000003319,ENSOARG00000009682,ENSOARG00000008332,ENSOARG00000025182,ENSOARG00000001783,ENSOARG00000018943,ENSOARG00000008480,ENSOARG0…	23	ENSOARG00000016285,ENSOARG00000014425,ENSOARG00000001504,ENSOARG00000020519,ENSOARG00000000450,Novel02256,ENSOARG00000015118,Novel01381,ENSOARG00000002386,ENSOARG00000012490,ENSOARG00000011865,ENSOARG00000014824,ENSOARG00000000417,Novel02176,ENSOARG00000017769,ENSOARG00000018980,ENSOARG00000011565,ENSOARG00000004800,ENSOARG00000002260,ENSOARG00000021001,ENSOARG00000011128,ENSOARG00000013752,ENSOA…
GO:0006355	regulation of transcription, DNA-templated	biological_process	0.0019435	0.049208	112	677	2355	19130	79	ENSOARG00000010410,ENSOARG00000003908,ENSOARG00000016622,ENSOARG00000002811,ENSOARG00000010939,ENSOARG00000012131,ENSOARG00000019067,ENSOARG00000017265,ENSOARG00000014822,ENSOARG00000011146,ENSOARG00000015044,ENSOARG00000017631,ENSOARG00000006421,ENSOARG00000017214,ENSOARG00000008705,ENSOARG00000012344,ENSOARG00000016334,ENSOARG00000009172,ENSOARG00000004208,ENSOARG00000013482,ENSOARG00000004484,…	33	Novel01871,ENSOARG00000002366,Novel01381,ENSOARG00000016352,ENSOARG00000004414,ENSOARG00000006034,ENSOARG00000004871,ENSOARG00000020376,Novel00191,ENSOARG00000011056,ENSOARG00000017964,ENSOARG00000014590,ENSOARG00000013752,ENSOARG00000011865,Novel00685,ENSOARG00000017769,ENSOARG00000001487,ENSOARG00000016363,ENSOARG00000017474,ENSOARG00000016285,ENSOARG00000019395,ENSOARG00000012667,ENSOARG000000…
GO:0070887	cellular response to chemical stimulus	biological_process	2.5537e-14	8.6739e-12	110	677	1439	19130	90	ENSOARG00000020050,ENSOARG00000017562,ENSOARG00000009301,ENSOARG00000004499,ENSOARG00000014188,ENSOARG00000012180,ENSOARG00000004774,ENSOARG00000014214,ENSOARG00000017199,ENSOARG00000008249,ENSOARG00000016133,ENSOARG00000002699,ENSOARG00000006538,ENSOARG00000020889,ENSOARG00000014631,ENSOARG00000020112,ENSOARG00000018039,ENSOARG00000016047,ENSOARG00000009957,ENSOARG00000017265,ENSOARG00000012461,…	20	ENSOARG00000002366,ENSOARG00000017474,ENSOARG00000008554,ENSOARG00000002449,ENSOARG00000001504,ENSOARG00000000450,ENSOARG00000004871,ENSOARG00000017168,ENSOARG00000018548,ENSOARG00000004414,ENSOARG00000016285,ENSOARG00000014723,ENSOARG00000021001,ENSOARG00000013752,ENSOARG00000013151,ENSOARG00000021060,ENSOARG00000019817,ENSOARG00000017769,ENSOARG00000006526,ENSOARG00000000417
GO:0050793	regulation of developmental process	biological_process	1.8205e-11	3.6823e-09	110	677	1577	19130	87	ENSOARG00000007690,ENSOARG00000020889,ENSOARG00000019503,ENSOARG00000006553,ENSOARG00000018039,ENSOARG00000002053,ENSOARG00000015718,ENSOARG00000016133,ENSOARG00000008091,ENSOARG00000002699,ENSOARG00000008349,ENSOARG00000019663,ENSOARG00000020968,ENSOARG00000006614,ENSOARG00000017562,ENSOARG00000017807,ENSOARG00000020761,ENSOARG00000005579,ENSOARG00000017465,ENSOARG00000014463,ENSOARG00000020050,…	23	ENSOARG00000011464,ENSOARG00000004871,ENSOARG00000006034,ENSOARG00000014723,ENSOARG00000016285,ENSOARG00000016764,ENSOARG00000004414,ENSOARG00000015118,ENSOARG00000006212,ENSOARG00000002555,ENSOARG00000002366,ENSOARG00000001487,ENSOARG00000000322,ENSOARG00000006378,ENSOARG00000016342,ENSOARG00000017769,ENSOARG00000011865,ENSOARG00000013752,ENSOARG00000021001,ENSOARG00000017964,ENSOARG00000011019,…
GO:0048584	positive regulation of response to stimulus	biological_process	1.4806e-17	7.404e-15	107	677	1237	19130	93	ENSOARG00000008526,ENSOARG00000014762,ENSOARG00000020861,ENSOARG00000003112,ENSOARG00000014085,ENSOARG00000016017,ENSOARG00000006358,ENSOARG00000015215,ENSOARG00000020030,ENSOARG00000020734,ENSOARG00000008480,ENSOARG00000016193,ENSOARG00000016922,ENSOARG00000015970,ENSOARG00000009682,ENSOARG00000008332,ENSOARG00000004787,ENSOARG00000001060,ENSOARG00000021005,ENSOARG00000020667,ENSOARG00000019963,…	14	ENSOARG00000004871,ENSOARG00000000450,ENSOARG00000006378,ENSOARG00000020287,ENSOARG00000008521,ENSOARG00000011865,ENSOARG00000006526,ENSOARG00000014723,ENSOARG00000000417,ENSOARG00000011352,ENSOARG00000004314,ENSOARG00000011019,ENSOARG00000008534,ENSOARG00000002260
GO:0010033	response to organic substance	biological_process	2.2129e-12	5.5329e-10	105	677	1423	19130	85	ENSOARG00000015180,ENSOARG00000013918,ENSOARG00000008340,ENSOARG00000021000,ENSOARG00000020622,ENSOARG00000014236,ENSOARG00000002223,ENSOARG00000005792,ENSOARG00000005075,ENSOARG00000018210,ENSOARG00000010521,ENSOARG00000008057,ENSOARG00000010493,ENSOARG00000016937,ENSOARG00000025180,ENSOARG00000003782,ENSOARG00000017205,ENSOARG00000000058,ENSOARG00000007229,ENSOARG00000018510,ENSOARG00000006353,…	20	ENSOARG00000002366,ENSOARG00000016766,ENSOARG00000017474,ENSOARG00000017468,ENSOARG00000008554,ENSOARG00000004414,ENSOARG00000016285,ENSOARG00000002449,ENSOARG00000001504,ENSOARG00000004871,ENSOARG00000017168,ENSOARG00000018548,ENSOARG00000021060,ENSOARG00000019817,ENSOARG00000021001,ENSOARG00000011128,ENSOARG00000013752,ENSOARG00000002386,ENSOARG00000006526,ENSOARG00000017769
GO:0051246	regulation of protein metabolic process	biological_process	4.9121e-08	5.1412e-06	105	677	1732	19130	88	ENSOARG00000004484,ENSOARG00000001568,ENSOARG00000014188,ENSOARG00000012180,ENSOARG00000015037,ENSOARG00000003130,ENSOARG00000010664,ENSOARG00000020761,ENSOARG00000021177,ENSOARG00000014463,ENSOARG00000020050,ENSOARG00000006301,ENSOARG00000010448,ENSOARG00000020968,ENSOARG00000018615,ENSOARG00000018337,ENSOARG00000003206,ENSOARG00000020889,ENSOARG00000006553,ENSOARG00000019503,ENSOARG00000018039,…	17	ENSOARG00000020287,ENSOARG00000006378,ENSOARG00000008521,ENSOARG00000000417,ENSOARG00000011352,ENSOARG00000011865,ENSOARG00000006526,ENSOARG00000011128,ENSOARG00000021001,ENSOARG00000007493,ENSOARG00000013752,ENSOARG00000011019,ENSOARG00000002260,ENSOARG00000000450,ENSOARG00000020519,ENSOARG00000001504,ENSOARG00000002366
GO:0016310	phosphorylation	biological_process	4.885e-09	5.9419e-07	104	677	1591	19130	83	ENSOARG00000003844,ENSOARG00000002811,ENSOARG00000012367,ENSOARG00000013646,ENSOARG00000002263,ENSOARG00000004010,ENSOARG00000008984,ENSOARG00000003798,ENSOARG00000011171,ENSOARG00000001094,ENSOARG00000012732,ENSOARG00000017631,ENSOARG00000001158,ENSOARG00000015044,ENSOARG00000002820,ENSOARG00000020214,ENSOARG00000014750,ENSOARG00000011437,ENSOARG00000012344,ENSOARG00000005746,ENSOARG00000014214,…	21	ENSOARG00000011019,ENSOARG00000002260,ENSOARG00000021001,ENSOARG00000011128,ENSOARG00000013752,ENSOARG00000008521,ENSOARG00000006526,ENSOARG00000011865,ENSOARG00000014824,ENSOARG00000011352,ENSOARG00000005646,ENSOARG00000006378,ENSOARG00000017826,ENSOARG00000020287,ENSOARG00000010184,ENSOARG00000004502,ENSOARG00000008554,ENSOARG00000020763,ENSOARG00000016285,ENSOARG00000014425,ENSOARG00000002033
GO:0032268	regulation of cellular protein metabolic process	biological_process	5.6574e-08	5.887e-06	98	677	1589	19130	81	ENSOARG00000017205,ENSOARG00000009653,ENSOARG00000001202,ENSOARG00000021097,ENSOARG00000006760,ENSOARG00000016937,ENSOARG00000014582,ENSOARG00000008285,ENSOARG00000006353,ENSOARG00000018510,ENSOARG00000007229,ENSOARG00000006813,ENSOARG00000005792,ENSOARG00000020741,ENSOARG00000010493,ENSOARG00000008057,ENSOARG00000008189,ENSOARG00000018210,ENSOARG00000014762,ENSOARG00000001574,ENSOARG00000017093,…	17	ENSOARG00000002366,ENSOARG00000020519,ENSOARG00000000450,ENSOARG00000001504,ENSOARG00000007493,ENSOARG00000013752,ENSOARG00000011128,ENSOARG00000021001,ENSOARG00000002260,ENSOARG00000011019,ENSOARG00000020287,ENSOARG00000006378,ENSOARG00000000417,ENSOARG00000011352,ENSOARG00000011865,ENSOARG00000006526,ENSOARG00000008521
GO:0040011	locomotion	biological_process	4.4586e-16	1.7837e-13	96	677	1081	19130	82	ENSOARG00000007932,ENSOARG00000016937,ENSOARG00000006760,ENSOARG00000007525,ENSOARG00000007984,ENSOARG00000007229,ENSOARG00000006813,ENSOARG00000018510,ENSOARG00000014023,ENSOARG00000008285,ENSOARG00000018838,ENSOARG00000014774,ENSOARG00000020622,ENSOARG00000012064,ENSOARG00000009000,ENSOARG00000015286,ENSOARG00000000158,ENSOARG00000014236,ENSOARG00000014361,ENSOARG00000015180,ENSOARG00000008340,…	14	ENSOARG00000001487,ENSOARG00000000450,ENSOARG00000004871,ENSOARG00000011865,ENSOARG00000014723,ENSOARG00000006034,ENSOARG00000006526,ENSOARG00000000417,ENSOARG00000015118,ENSOARG00000013752,ENSOARG00000021001,ENSOARG00000017474,ENSOARG00000003149,ENSOARG00000013151
GO:0006928	movement of cell or subcellular component	biological_process	8.3323e-13	2.2388e-10	94	677	1179	19130	79	ENSOARG00000016334,ENSOARG00000006421,ENSOARG00000004721,ENSOARG00000009401,ENSOARG00000015044,ENSOARG00000010543,ENSOARG00000002790,ENSOARG00000011146,ENSOARG00000000123,ENSOARG00000008473,ENSOARG00000008908,ENSOARG00000006007,ENSOARG00000010939,ENSOARG00000012367,ENSOARG00000004983,ENSOARG00000003604,ENSOARG00000002263,ENSOARG00000016047,ENSOARG00000004015,ENSOARG00000018039,ENSOARG00000016133,…	15	ENSOARG00000021001,ENSOARG00000015118,ENSOARG00000013752,ENSOARG00000004312,ENSOARG00000013151,ENSOARG00000017474,ENSOARG00000003149,ENSOARG00000004871,ENSOARG00000000450,ENSOARG00000001487,ENSOARG00000006034,ENSOARG00000011865,ENSOARG00000014723,ENSOARG00000006526,ENSOARG00000000417
GO:0006468	protein phosphorylation	biological_process	1.0203e-09	1.4238e-07	94	677	1334	19130	79	ENSOARG00000014762,ENSOARG00000017093,ENSOARG00000015723,ENSOARG00000009999,ENSOARG00000006358,ENSOARG00000016017,ENSOARG00000003963,ENSOARG00000020030,ENSOARG00000015215,ENSOARG00000004797,ENSOARG00000009682,ENSOARG00000008332,ENSOARG00000008480,ENSOARG00000016193,ENSOARG00000012400,ENSOARG00000004787,ENSOARG00000012355,ENSOARG00000001060,ENSOARG00000002144,ENSOARG00000015592,ENSOARG00000009653,…	15	ENSOARG00000006378,ENSOARG00000017826,ENSOARG00000020287,ENSOARG00000005646,ENSOARG00000006526,ENSOARG00000011865,ENSOARG00000014425,ENSOARG00000011352,ENSOARG00000008521,ENSOARG00000020763,ENSOARG00000013752,ENSOARG00000021001,ENSOARG00000011128,ENSOARG00000002260,ENSOARG00000011019
GO:0009888	tissue development	biological_process	4.7099e-09	5.7678e-07	94	677	1397	19130	70	ENSOARG00000010080,ENSOARG00000005322,ENSOARG00000012367,ENSOARG00000019067,ENSOARG00000010939,ENSOARG00000003844,ENSOARG00000016622,ENSOARG00000014822,ENSOARG00000006007,ENSOARG00000009599,ENSOARG00000016790,ENSOARG00000017214,ENSOARG00000000405,ENSOARG00000006421,ENSOARG00000016334,ENSOARG00000013317,ENSOARG00000017420,ENSOARG00000019971,ENSOARG00000008249,ENSOARG00000021177,ENSOARG00000005365,…	24	ENSOARG00000005781,ENSOARG00000004871,ENSOARG00000001159,ENSOARG00000006034,ENSOARG00000014425,ENSOARG00000016764,ENSOARG00000016285,ENSOARG00000015118,ENSOARG00000016363,ENSOARG00000008534,ENSOARG00000002366,ENSOARG00000006378,ENSOARG00000017769,ENSOARG00000012490,ENSOARG00000004312,ENSOARG00000007493,ENSOARG00000019145,ENSOARG00000013752,ENSOARG00000011128,ENSOARG00000012314,ENSOARG00000021001,…
GO:0008283	cell proliferation	biological_process	5.0086e-12	1.1131e-09	93	677	1233	19130	76	ENSOARG00000015655,ENSOARG00000014774,ENSOARG00000012064,ENSOARG00000009000,ENSOARG00000005792,ENSOARG00000017875,ENSOARG00000015180,ENSOARG00000013918,ENSOARG00000019324,ENSOARG00000006813,ENSOARG00000007229,ENSOARG00000006353,ENSOARG00000008285,ENSOARG00000007932,ENSOARG00000016937,ENSOARG00000013157,ENSOARG00000005236,ENSOARG00000001060,ENSOARG00000007252,ENSOARG00000001497,ENSOARG00000018775,…	17	ENSOARG00000021001,ENSOARG00000013010,ENSOARG00000013752,ENSOARG00000013151,ENSOARG00000011019,ENSOARG00000006378,ENSOARG00000011865,ENSOARG00000012178,ENSOARG00000020763,ENSOARG00000015118,ENSOARG00000008534,ENSOARG00000015038,ENSOARG00000017474,ENSOARG00000008554,ENSOARG00000004414,ENSOARG00000016764,ENSOARG00000006034
GO:0032879	regulation of localization	biological_process	5.192e-06	0.00036227	93	677	1604	19130	77	ENSOARG00000020249,ENSOARG00000011146,ENSOARG00000008473,ENSOARG00000008908,ENSOARG00000017265,ENSOARG00000003028,ENSOARG00000010939,ENSOARG00000005322,ENSOARG00000019670,ENSOARG00000020138,ENSOARG00000006737,ENSOARG00000002263,ENSOARG00000003604,ENSOARG00000004208,ENSOARG00000013509,ENSOARG00000008893,ENSOARG00000011437,ENSOARG00000017631,ENSOARG00000017892,ENSOARG00000009401,ENSOARG00000015044,…	16	ENSOARG00000021001,ENSOARG00000005434,ENSOARG00000004312,ENSOARG00000013752,ENSOARG00000013151,ENSOARG00000000322,ENSOARG00000002386,ENSOARG00000006526,ENSOARG00000000417,ENSOARG00000001444,ENSOARG00000017474,ENSOARG00000001504,ENSOARG00000000450,ENSOARG00000004871,ENSOARG00000014723,ENSOARG00000014425
GO:0006955	immune response	biological_process	5.6673e-27	2.0404e-23	92	677	735	19130	85	ENSOARG00000014188,ENSOARG00000020351,ENSOARG00000016257,ENSOARG00000014214,ENSOARG00000004774,ENSOARG00000015037,ENSOARG00000009301,ENSOARG00000005579,ENSOARG00000012145,ENSOARG00000007864,ENSOARG00000006301,ENSOARG00000002039,ENSOARG00000020968,ENSOARG00000020889,ENSOARG00000020112,ENSOARG00000008208,ENSOARG00000015718,ENSOARG00000016047,ENSOARG00000008091,ENSOARG00000016133,ENSOARG00000002699,…	7	ENSOARG00000000450,ENSOARG00000017769,ENSOARG00000017973,ENSOARG00000011019,ENSOARG00000000417,ENSOARG00000014723,Novel01912
GO:0002682	regulation of immune system process	biological_process	7.7506e-23	1.0733e-19	91	677	808	19130	84	ENSOARG00000012064,ENSOARG00000021000,ENSOARG00000005792,ENSOARG00000014236,ENSOARG00000016042,ENSOARG00000008340,ENSOARG00000013918,ENSOARG00000008057,ENSOARG00000013573,ENSOARG00000009800,ENSOARG00000010521,ENSOARG00000007932,ENSOARG00000000058,ENSOARG00000003782,ENSOARG00000019324,ENSOARG00000007525,ENSOARG00000018510,ENSOARG00000006813,ENSOARG00000007229,ENSOARG00000003254,ENSOARG00000015177,…	7	ENSOARG00000011019,ENSOARG00000013151,ENSOARG00000016285,ENSOARG00000011865,ENSOARG00000014723,ENSOARG00000014425,ENSOARG00000021001
GO:0050790	regulation of catalytic activity	biological_process	1.5601e-08	1.7336e-06	91	677	1388	19130	77	ENSOARG00000015177,ENSOARG00000016922,ENSOARG00000005926,ENSOARG00000004797,ENSOARG00000009682,ENSOARG00000008332,ENSOARG00000004787,ENSOARG00000013157,ENSOARG00000015592,ENSOARG00000019876,ENSOARG00000017093,ENSOARG00000003099,ENSOARG00000014288,ENSOARG00000014762,ENSOARG00000020818,ENSOARG00000021090,ENSOARG00000009999,ENSOARG00000016017,ENSOARG00000006358,ENSOARG00000003963,ENSOARG00000020030,…	14	ENSOARG00000016285,ENSOARG00000008521,ENSOARG00000000417,ENSOARG00000011352,ENSOARG00000006526,ENSOARG00000011865,ENSOARG00000000450,ENSOARG00000020519,ENSOARG00000020287,ENSOARG00000019235,ENSOARG00000002260,ENSOARG00000011128,ENSOARG00000007493,ENSOARG00000004312
GO:0007155	cell adhesion	biological_process	3.1056e-17	1.4712e-14	90	677	922	19130	82	ENSOARG00000008285,ENSOARG00000006813,ENSOARG00000007229,ENSOARG00000007525,ENSOARG00000019286,ENSOARG00000003782,ENSOARG00000000058,ENSOARG00000007932,ENSOARG00000009800,ENSOARG00000005711,ENSOARG00000013573,ENSOARG00000013918,ENSOARG00000008340,ENSOARG00000017875,ENSOARG00000009000,ENSOARG00000007774,ENSOARG00000016017,ENSOARG00000010199,ENSOARG00000000571,ENSOARG00000015592,ENSOARG00000018775,…	8	ENSOARG00000017474,ENSOARG00000000450,ENSOARG00000020519,ENSOARG00000004871,Novel02176,ENSOARG00000000417,ENSOARG00000014425,ENSOARG00000011865
GO:0022610	biological adhesion	biological_process	4.7557e-17	2.0881e-14	90	677	928	19130	82	ENSOARG00000007932,ENSOARG00000000058,ENSOARG00000003782,ENSOARG00000019286,ENSOARG00000007525,ENSOARG00000006813,ENSOARG00000007229,ENSOARG00000008285,ENSOARG00000009000,ENSOARG00000017875,ENSOARG00000008340,ENSOARG00000013918,ENSOARG00000013573,ENSOARG00000005711,ENSOARG00000009800,ENSOARG00000000571,ENSOARG00000010199,ENSOARG00000016017,ENSOARG00000007774,ENSOARG00000020734,ENSOARG00000005007,…	8	ENSOARG00000017474,Novel02176,ENSOARG00000004871,ENSOARG00000000450,ENSOARG00000020519,ENSOARG00000014425,ENSOARG00000011865,ENSOARG00000000417
GO:2000026	regulation of multicellular organismal development	biological_process	5.9697e-11	1.0855e-08	89	677	1186	19130	72	ENSOARG00000000123,ENSOARG00000006007,ENSOARG00000014822,ENSOARG00000002263,ENSOARG00000020138,ENSOARG00000008984,ENSOARG00000005322,ENSOARG00000016622,ENSOARG00000012131,ENSOARG00000019067,ENSOARG00000013646,ENSOARG00000011239,ENSOARG00000000405,ENSOARG00000004208,ENSOARG00000013482,ENSOARG00000009827,ENSOARG00000016334,ENSOARG00000016790,ENSOARG00000005167,ENSOARG00000017631,ENSOARG00000020050,…	17	ENSOARG00000016285,ENSOARG00000016764,ENSOARG00000006034,ENSOARG00000011464,ENSOARG00000004871,ENSOARG00000002366,ENSOARG00000006212,ENSOARG00000015118,ENSOARG00000011865,ENSOARG00000006378,ENSOARG00000016342,ENSOARG00000001487,ENSOARG00000013151,ENSOARG00000011019,ENSOARG00000017964,ENSOARG00000021001,ENSOARG00000013752
GO:0071310	cellular response to organic substance	biological_process	2.924e-11	5.7215e-09	87	677	1131	19130	71	ENSOARG00000017265,ENSOARG00000000123,ENSOARG00000006007,ENSOARG00000011146,ENSOARG00000003604,ENSOARG00000020138,ENSOARG00000010080,ENSOARG00000003908,ENSOARG00000003844,ENSOARG00000010939,ENSOARG00000019067,ENSOARG00000011239,ENSOARG00000009932,ENSOARG00000012344,ENSOARG00000017214,ENSOARG00000002790,ENSOARG00000015044,ENSOARG00000019197,ENSOARG00000017631,ENSOARG00000020050,ENSOARG00000004499,…	16	ENSOARG00000002366,ENSOARG00000017474,ENSOARG00000008554,ENSOARG00000002449,ENSOARG00000001504,ENSOARG00000004871,ENSOARG00000017168,ENSOARG00000018548,ENSOARG00000004414,ENSOARG00000016285,ENSOARG00000021001,ENSOARG00000013752,ENSOARG00000021060,ENSOARG00000019817,ENSOARG00000017769,ENSOARG00000006526
GO:0051240	positive regulation of multicellular organismal process	biological_process	2.0697e-13	6.2099e-11	84	677	980	19130	71	ENSOARG00000013646,ENSOARG00000019067,ENSOARG00000010939,ENSOARG00000010080,ENSOARG00000020138,ENSOARG00000008984,ENSOARG00000002263,ENSOARG00000020249,ENSOARG00000014822,ENSOARG00000006007,ENSOARG00000008908,ENSOARG00000000123,ENSOARG00000017265,ENSOARG00000017631,ENSOARG00000009401,ENSOARG00000015044,ENSOARG00000009827,ENSOARG00000013482,ENSOARG00000013509,ENSOARG00000000405,ENSOARG00000011239,…	13	ENSOARG00000006212,ENSOARG00000017964,ENSOARG00000011019,ENSOARG00000013151,ENSOARG00000015118,ENSOARG00000013752,ENSOARG00000021001,ENSOARG00000000417,ENSOARG00000004414,ENSOARG00000006378,ENSOARG00000016342,ENSOARG00000011464,ENSOARG00000004871
GO:0048468	cell development	biological_process	1.7037e-05	0.00098935	83	677	1399	19130	65	ENSOARG00000016017,ENSOARG00000006358,ENSOARG00000010473,ENSOARG00000004403,ENSOARG00000012532,ENSOARG00000001574,ENSOARG00000009999,ENSOARG00000012355,ENSOARG00000001060,ENSOARG00000015592,ENSOARG00000002144,ENSOARG00000005007,ENSOARG00000004797,ENSOARG00000004787,ENSOARG00000004812,ENSOARG00000020233,ENSOARG00000014582,ENSOARG00000007525,ENSOARG00000007984,ENSOARG00000006760,ENSOARG00000015655,…	18	ENSOARG00000011865,ENSOARG00000006526,ENSOARG00000006378,ENSOARG00000001487,ENSOARG00000017964,ENSOARG00000003149,ENSOARG00000011056,ENSOARG00000011019,ENSOARG00000013752,ENSOARG00000012314,ENSOARG00000006034,ENSOARG00000014425,ENSOARG00000004414,ENSOARG00000016764,ENSOARG00000011464,ENSOARG00000004871,ENSOARG00000006212,ENSOARG00000015118
GO:0009891	positive regulation of biosynthetic process	biological_process	4.8689e-07	4.4046e-05	82	677	1305	19130	61	ENSOARG00000020050,ENSOARG00000016937,ENSOARG00000012094,ENSOARG00000017562,ENSOARG00000007763,ENSOARG00000015037,ENSOARG00000004499,ENSOARG00000014623,ENSOARG00000006353,ENSOARG00000018510,ENSOARG00000007984,ENSOARG00000017199,ENSOARG00000017420,ENSOARG00000009058,ENSOARG00000008340,ENSOARG00000013176,ENSOARG00000015180,ENSOARG00000005792,ENSOARG00000006553,ENSOARG00000019503,ENSOARG00000015379,…	21	ENSOARG00000002366,ENSOARG00000017474,ENSOARG00000016363,ENSOARG00000001504,ENSOARG00000004871,ENSOARG00000004414,ENSOARG00000016285,ENSOARG00000006034,ENSOARG00000012667,ENSOARG00000021001,ENSOARG00000005434,ENSOARG00000012314,ENSOARG00000013752,ENSOARG00000009675,ENSOARG00000019817,ENSOARG00000017769,ENSOARG00000019235,ENSOARG00000016342,ENSOARG00000006378,ENSOARG00000006526,ENSOARG00000011865
GO:0001775	cell activation	biological_process	2.9307e-26	8.7932e-23	81	677	586	19130	78	ENSOARG00000017420,ENSOARG00000009250,ENSOARG00000015037,ENSOARG00000005579,ENSOARG00000021177,ENSOARG00000012145,ENSOARG00000007864,ENSOARG00000006301,ENSOARG00000020968,ENSOARG00000004628,ENSOARG00000009234,ENSOARG00000020889,ENSOARG00000006553,ENSOARG00000020112,ENSOARG00000015718,ENSOARG00000008208,ENSOARG00000008091,ENSOARG00000016133,ENSOARG00000013173,ENSOARG00000002699,ENSOARG00000012131,…	3	ENSOARG00000011865,ENSOARG00000014425,ENSOARG00000011019
GO:0006915	apoptotic process	biological_process	2.1011e-10	3.3179e-08	81	677	1078	19130	68	ENSOARG00000001202,ENSOARG00000016937,ENSOARG00000014364,ENSOARG00000017205,ENSOARG00000006353,ENSOARG00000018510,ENSOARG00000007229,ENSOARG00000019324,ENSOARG00000007984,ENSOARG00000007525,ENSOARG00000014582,ENSOARG00000017034,ENSOARG00000003994,ENSOARG00000020741,ENSOARG00000015167,ENSOARG00000014774,ENSOARG00000009256,ENSOARG00000009800,ENSOARG00000011235,ENSOARG00000010493,ENSOARG00000008057,…	13	ENSOARG00000017769,ENSOARG00000000450,ENSOARG00000014425,ENSOARG00000000417,ENSOARG00000019395,ENSOARG00000016764,ENSOARG00000007493,ENSOARG00000013752,ENSOARG00000015118,ENSOARG00000004314,ENSOARG00000002555,ENSOARG00000011019,ENSOARG00000013151
GO:0012501	programmed cell death	biological_process	4.7283e-10	6.8644e-08	81	677	1096	19130	68	ENSOARG00000004787,ENSOARG00000008332,ENSOARG00000018528,ENSOARG00000016922,ENSOARG00000015592,ENSOARG00000018189,ENSOARG00000001060,ENSOARG00000009999,ENSOARG00000010199,ENSOARG00000012532,ENSOARG00000006358,ENSOARG00000017034,ENSOARG00000003994,ENSOARG00000020741,ENSOARG00000015167,ENSOARG00000014774,ENSOARG00000009256,ENSOARG00000009800,ENSOARG00000011235,ENSOARG00000010493,ENSOARG00000008057,…	13	ENSOARG00000015118,ENSOARG00000007493,ENSOARG00000004314,ENSOARG00000013752,ENSOARG00000002555,ENSOARG00000013151,ENSOARG00000011019,ENSOARG00000017769,ENSOARG00000000450,ENSOARG00000014425,ENSOARG00000000417,ENSOARG00000019395,ENSOARG00000016764
GO:0019220	regulation of phosphate metabolic process	biological_process	1.4145e-09	1.9146e-07	81	677	1119	19130	67	ENSOARG00000017199,ENSOARG00000012180,ENSOARG00000014188,ENSOARG00000004484,ENSOARG00000017562,ENSOARG00000010664,ENSOARG00000020761,ENSOARG00000014463,ENSOARG00000020050,ENSOARG00000006301,ENSOARG00000020968,ENSOARG00000010448,ENSOARG00000019663,ENSOARG00000014926,ENSOARG00000003206,ENSOARG00000019503,ENSOARG00000015718,ENSOARG00000001254,ENSOARG00000018039,ENSOARG00000016133,ENSOARG00000006538,…	14	ENSOARG00000013752,ENSOARG00000021001,ENSOARG00000011128,ENSOARG00000002260,ENSOARG00000008554,ENSOARG00000011019,ENSOARG00000006378,ENSOARG00000018980,ENSOARG00000020287,ENSOARG00000006526,ENSOARG00000011865,ENSOARG00000011352,ENSOARG00000008521,ENSOARG00000016285
GO:0051174	regulation of phosphorus metabolic process	biological_process	1.7383e-09	2.2676e-07	81	677	1124	19130	67	ENSOARG00000014762,ENSOARG00000000571,ENSOARG00000017093,ENSOARG00000015723,ENSOARG00000009999,ENSOARG00000003112,ENSOARG00000006358,ENSOARG00000016017,ENSOARG00000003963,ENSOARG00000020030,ENSOARG00000004797,ENSOARG00000009682,ENSOARG00000008332,ENSOARG00000008480,ENSOARG00000016193,ENSOARG00000004787,ENSOARG00000001060,ENSOARG00000015592,ENSOARG00000002144,ENSOARG00000009653,ENSOARG00000021097,…	14	ENSOARG00000008521,ENSOARG00000016285,ENSOARG00000011865,ENSOARG00000006526,ENSOARG00000011352,ENSOARG00000006378,ENSOARG00000018980,ENSOARG00000020287,ENSOARG00000011019,ENSOARG00000008554,ENSOARG00000002260,ENSOARG00000021001,ENSOARG00000011128,ENSOARG00000013752
GO:0008219	cell death	biological_process	6.8857e-09	8.155e-07	81	677	1163	19130	68	ENSOARG00000003994,ENSOARG00000017034,ENSOARG00000014774,ENSOARG00000015167,ENSOARG00000020741,ENSOARG00000011235,ENSOARG00000009800,ENSOARG00000009256,ENSOARG00000008057,ENSOARG00000010493,ENSOARG00000016937,ENSOARG00000014364,ENSOARG00000001202,ENSOARG00000017205,ENSOARG00000007229,ENSOARG00000018510,ENSOARG00000006353,ENSOARG00000014582,ENSOARG00000007525,ENSOARG00000007984,ENSOARG00000019324,…	13	ENSOARG00000002555,ENSOARG00000013151,ENSOARG00000011019,ENSOARG00000004314,ENSOARG00000007493,ENSOARG00000015118,ENSOARG00000013752,ENSOARG00000000417,ENSOARG00000014425,ENSOARG00000016764,ENSOARG00000019395,ENSOARG00000000450,ENSOARG00000017769
GO:0016265	death	biological_process	6.8857e-09	8.155e-07	81	677	1163	19130	68	ENSOARG00000009921,ENSOARG00000000123,ENSOARG00000009599,ENSOARG00000008908,ENSOARG00000006007,ENSOARG00000020138,ENSOARG00000008984,ENSOARG00000005322,ENSOARG00000016138,ENSOARG00000003604,ENSOARG00000010939,ENSOARG00000012131,ENSOARG00000017214,ENSOARG00000014750,ENSOARG00000006421,ENSOARG00000005846,ENSOARG00000016334,ENSOARG00000002790,ENSOARG00000017892,ENSOARG00000019197,ENSOARG00000011768,…	13	ENSOARG00000013151,ENSOARG00000011019,ENSOARG00000002555,ENSOARG00000007493,ENSOARG00000015118,ENSOARG00000013752,ENSOARG00000004314,ENSOARG00000019395,ENSOARG00000016764,ENSOARG00000014425,ENSOARG00000000417,ENSOARG00000017769,ENSOARG00000000450
GO:0031328	positive regulation of cellular biosynthetic process	biological_process	4.9486e-07	4.4321e-05	81	677	1283	19130	60	ENSOARG00000015180,ENSOARG00000013176,ENSOARG00000008340,ENSOARG00000018838,ENSOARG00000021000,ENSOARG00000018039,ENSOARG00000014774,ENSOARG00000006553,ENSOARG00000015379,ENSOARG00000019503,ENSOARG00000005792,ENSOARG00000009957,ENSOARG00000009234,ENSOARG00000014926,ENSOARG00000008057,ENSOARG00000006614,ENSOARG00000010493,ENSOARG00000019663,ENSOARG00000016937,ENSOARG00000020050,ENSOARG00000004499,…	21	ENSOARG00000006034,ENSOARG00000012667,ENSOARG00000004414,ENSOARG00000016285,ENSOARG00000001504,ENSOARG00000004871,ENSOARG00000017474,ENSOARG00000016363,ENSOARG00000002366,ENSOARG00000006526,ENSOARG00000011865,ENSOARG00000006378,ENSOARG00000016342,ENSOARG00000019235,ENSOARG00000017769,ENSOARG00000019817,ENSOARG00000009675,ENSOARG00000013752,ENSOARG00000021001,ENSOARG00000012314,ENSOARG00000005434
GO:1902531	regulation of intracellular signal transduction	biological_process	3.1421e-10	4.7532e-08	80	677	1043	19130	69	ENSOARG00000008984,ENSOARG00000004983,ENSOARG00000013646,ENSOARG00000003844,ENSOARG00000003798,ENSOARG00000010543,ENSOARG00000008161,ENSOARG00000015044,ENSOARG00000001094,ENSOARG00000017631,ENSOARG00000000405,ENSOARG00000011437,ENSOARG00000004208,ENSOARG00000019347,ENSOARG00000020214,ENSOARG00000004484,ENSOARG00000012180,ENSOARG00000017465,ENSOARG00000014463,ENSOARG00000020050,ENSOARG00000006301,…	11	ENSOARG00000008521,ENSOARG00000016285,ENSOARG00000011865,ENSOARG00000000417,ENSOARG00000011352,ENSOARG00000000450,ENSOARG00000020287,ENSOARG00000013151,ENSOARG00000011019,ENSOARG00000002260,ENSOARG00000011128
GO:0051173	positive regulation of nitrogen compound metabolic process	biological_process	5.8328e-06	0.00039623	79	677	1299	19130	59	ENSOARG00000003844,ENSOARG00000012131,ENSOARG00000010939,ENSOARG00000019067,ENSOARG00000004403,ENSOARG00000001574,ENSOARG00000014762,ENSOARG00000011146,ENSOARG00000014822,ENSOARG00000003112,ENSOARG00000017265,ENSOARG00000009999,ENSOARG00000001094,ENSOARG00000017631,ENSOARG00000012360,ENSOARG00000015592,ENSOARG00000015727,ENSOARG00000015044,ENSOARG00000006068,ENSOARG00000004797,ENSOARG00000016334,…	20	ENSOARG00000004414,ENSOARG00000016285,ENSOARG00000006034,ENSOARG00000012667,ENSOARG00000001504,ENSOARG00000004871,ENSOARG00000002366,ENSOARG00000017474,ENSOARG00000016363,ENSOARG00000011865,ENSOARG00000017769,ENSOARG00000016342,ENSOARG00000006378,ENSOARG00000009675,ENSOARG00000011019,ENSOARG00000019817,ENSOARG00000021001,ENSOARG00000012314,ENSOARG00000005434,ENSOARG00000013752
GO:0042127	regulation of cell proliferation	biological_process	1.5919e-11	3.294e-09	78	677	980	19130	62	ENSOARG00000015037,ENSOARG00000017562,ENSOARG00000007932,ENSOARG00000004499,ENSOARG00000016937,ENSOARG00000020050,ENSOARG00000013317,ENSOARG00000019324,ENSOARG00000017420,ENSOARG00000006353,ENSOARG00000008285,ENSOARG00000007229,ENSOARG00000006813,ENSOARG00000020112,ENSOARG00000005792,ENSOARG00000015718,ENSOARG00000018039,ENSOARG00000012064,ENSOARG00000014774,ENSOARG00000004015,ENSOARG00000015180,…	16	ENSOARG00000020763,ENSOARG00000015118,ENSOARG00000008534,ENSOARG00000008554,ENSOARG00000017474,ENSOARG00000016764,ENSOARG00000004414,ENSOARG00000006034,ENSOARG00000013010,ENSOARG00000021001,ENSOARG00000013752,ENSOARG00000013151,ENSOARG00000011019,ENSOARG00000006378,ENSOARG00000012178,ENSOARG00000011865
GO:0045935	positive regulation of nucleobase-containing compound metabolic process	biological_process	2.4326e-06	0.00018795	78	677	1249	19130	58	ENSOARG00000016334,ENSOARG00000004797,ENSOARG00000009172,ENSOARG00000008232,ENSOARG00000013482,ENSOARG00000001783,ENSOARG00000006068,ENSOARG00000017214,ENSOARG00000012344,ENSOARG00000008705,ENSOARG00000001094,ENSOARG00000017631,ENSOARG00000015592,ENSOARG00000012360,ENSOARG00000015727,ENSOARG00000015044,ENSOARG00000014762,ENSOARG00000014822,ENSOARG00000011146,ENSOARG00000001574,ENSOARG00000017265,…	20	ENSOARG00000002366,ENSOARG00000016363,ENSOARG00000017474,ENSOARG00000004871,ENSOARG00000001504,ENSOARG00000016285,ENSOARG00000004414,ENSOARG00000012667,ENSOARG00000006034,ENSOARG00000012314,ENSOARG00000005434,ENSOARG00000021001,ENSOARG00000013752,ENSOARG00000011019,ENSOARG00000009675,ENSOARG00000019817,ENSOARG00000017769,ENSOARG00000016342,ENSOARG00000006378,ENSOARG00000011865
GO:0051128	regulation of cellular component organization	biological_process	0.0014226	0.038743	77	677	1486	19130	65	ENSOARG00000016888,ENSOARG00000008893,ENSOARG00000005846,ENSOARG00000009401,ENSOARG00000016790,ENSOARG00000020959,ENSOARG00000010543,ENSOARG00000002790,ENSOARG00000020676,ENSOARG00000011146,ENSOARG00000008908,ENSOARG00000003028,ENSOARG00000020138,ENSOARG00000003604,ENSOARG00000002263,ENSOARG00000020889,ENSOARG00000006553,ENSOARG00000019503,ENSOARG00000003206,ENSOARG00000018039,ENSOARG00000016133,…	12	ENSOARG00000006212,ENSOARG00000016764,ENSOARG00000014425,ENSOARG00000011865,ENSOARG00000006526,ENSOARG00000000417,ENSOARG00000001504,ENSOARG00000011464,ENSOARG00000004871,ENSOARG00000006378,ENSOARG00000019235,ENSOARG00000000322
GO:0045321	leukocyte activation	biological_process	1.8425e-27	1.1056e-23	76	677	500	19130	73	ENSOARG00000003782,ENSOARG00000007932,ENSOARG00000000058,ENSOARG00000007229,ENSOARG00000018510,ENSOARG00000007525,ENSOARG00000019324,ENSOARG00000013918,ENSOARG00000008340,ENSOARG00000021000,ENSOARG00000009000,ENSOARG00000005792,ENSOARG00000009800,ENSOARG00000013573,ENSOARG00000010199,ENSOARG00000010462,ENSOARG00000009999,ENSOARG00000000571,ENSOARG00000016017,ENSOARG00000016193,ENSOARG00000011944,…	3	ENSOARG00000011865,ENSOARG00000014425,ENSOARG00000011019
GO:0023056	positive regulation of signaling	biological_process	7.652e-10	1.0847e-07	76	677	1009	19130	63	ENSOARG00000007234,ENSOARG00000020968,ENSOARG00000010493,ENSOARG00000010448,ENSOARG00000008057,ENSOARG00000015180,ENSOARG00000002699,ENSOARG00000003994,ENSOARG00000005792,ENSOARG00000020741,ENSOARG00000020889,ENSOARG00000019503,ENSOARG00000020622,ENSOARG00000015718,ENSOARG00000004484,ENSOARG00000006353,ENSOARG00000012180,ENSOARG00000018510,ENSOARG00000007229,ENSOARG00000007525,ENSOARG00000014582,…	13	ENSOARG00000011019,ENSOARG00000008534,ENSOARG00000002260,ENSOARG00000004314,ENSOARG00000012490,ENSOARG00000008521,ENSOARG00000011865,ENSOARG00000011352,ENSOARG00000000417,ENSOARG00000004871,ENSOARG00000000450,ENSOARG00000006378,ENSOARG00000020287
GO:0010647	positive regulation of cell communication	biological_process	1.6329e-09	2.1456e-07	76	677	1025	19130	63	ENSOARG00000003112,ENSOARG00000014085,ENSOARG00000014762,ENSOARG00000006007,ENSOARG00000003798,ENSOARG00000008526,ENSOARG00000010080,ENSOARG00000008984,ENSOARG00000020030,ENSOARG00000015215,ENSOARG00000013646,ENSOARG00000006358,ENSOARG00000019067,ENSOARG00000016017,ENSOARG00000003844,ENSOARG00000006421,ENSOARG00000004208,ENSOARG00000015970,ENSOARG00000008332,ENSOARG00000009682,ENSOARG00000020734,…	13	ENSOARG00000004871,ENSOARG00000000450,ENSOARG00000006378,ENSOARG00000020287,ENSOARG00000012490,ENSOARG00000008521,ENSOARG00000011865,ENSOARG00000000417,ENSOARG00000011352,ENSOARG00000004314,ENSOARG00000011019,ENSOARG00000008534,ENSOARG00000002260
GO:0048870	cell motility	biological_process	4.817e-11	8.9397e-09	75	677	922	19130	65	ENSOARG00000011146,ENSOARG00000008473,ENSOARG00000008908,ENSOARG00000000123,ENSOARG00000002263,ENSOARG00000004983,ENSOARG00000003604,ENSOARG00000012367,ENSOARG00000016334,ENSOARG00000010543,ENSOARG00000015044,ENSOARG00000004721,ENSOARG00000009401,ENSOARG00000007864,ENSOARG00000012145,ENSOARG00000017465,ENSOARG00000014463,ENSOARG00000016867,ENSOARG00000017562,ENSOARG00000016642,ENSOARG00000003130,…	10	ENSOARG00000000417,ENSOARG00000014723,ENSOARG00000006034,ENSOARG00000006526,ENSOARG00000000450,ENSOARG00000004871,ENSOARG00000017474,ENSOARG00000013151,ENSOARG00000013752,ENSOARG00000021001
GO:0051674	localization of cell	biological_process	4.817e-11	8.9397e-09	75	677	922	19130	65	ENSOARG00000016642,ENSOARG00000003130,ENSOARG00000017562,ENSOARG00000005579,ENSOARG00000014463,ENSOARG00000007864,ENSOARG00000017465,ENSOARG00000012145,ENSOARG00000016867,ENSOARG00000017560,ENSOARG00000017420,ENSOARG00000012180,ENSOARG00000004774,ENSOARG00000004015,ENSOARG00000016133,ENSOARG00000013173,ENSOARG00000006538,ENSOARG00000002699,ENSOARG00000008349,ENSOARG00000006614,ENSOARG00000011146,…	10	ENSOARG00000013752,ENSOARG00000021001,ENSOARG00000017474,ENSOARG00000013151,ENSOARG00000000450,ENSOARG00000004871,ENSOARG00000014723,ENSOARG00000006034,ENSOARG00000006526,ENSOARG00000000417
GO:0048585	negative regulation of response to stimulus	biological_process	1.582e-09	2.0965e-07	74	677	977	19130	66	ENSOARG00000009401,ENSOARG00000002790,ENSOARG00000004208,ENSOARG00000011239,ENSOARG00000012344,ENSOARG00000011437,ENSOARG00000016622,ENSOARG00000009791,ENSOARG00000010939,ENSOARG00000008984,ENSOARG00000011110,ENSOARG00000010080,ENSOARG00000000123,ENSOARG00000006007,ENSOARG00000008473,ENSOARG00000011146,ENSOARG00000000950,ENSOARG00000010448,ENSOARG00000009341,ENSOARG00000012299,ENSOARG00000018039,…	8	ENSOARG00000013752,ENSOARG00000002260,ENSOARG00000020519,ENSOARG00000006378,ENSOARG00000016764,ENSOARG00000016285,ENSOARG00000002386,ENSOARG00000014824
GO:0010628	positive regulation of gene expression	biological_process	0.00012034	0.0051312	74	677	1298	19130	54	ENSOARG00000008057,ENSOARG00000006614,ENSOARG00000010493,ENSOARG00000020968,ENSOARG00000009957,ENSOARG00000009234,ENSOARG00000018838,ENSOARG00000012299,ENSOARG00000018039,ENSOARG00000014774,ENSOARG00000019503,ENSOARG00000006553,ENSOARG00000015379,ENSOARG00000005792,ENSOARG00000015180,ENSOARG00000008340,ENSOARG00000013176,ENSOARG00000009058,ENSOARG00000017420,ENSOARG00000007984,ENSOARG00000006353,…	20	ENSOARG00000002366,ENSOARG00000016363,ENSOARG00000017474,ENSOARG00000016285,ENSOARG00000004414,ENSOARG00000012667,ENSOARG00000006034,ENSOARG00000004871,ENSOARG00000001504,ENSOARG00000009675,ENSOARG00000013151,ENSOARG00000019817,ENSOARG00000012314,ENSOARG00000005434,ENSOARG00000021001,ENSOARG00000013752,ENSOARG00000011865,ENSOARG00000017769,ENSOARG00000006378,ENSOARG00000016342
GO:0010557	positive regulation of macromolecule biosynthetic process	biological_process	2.7068e-05	0.0014856	73	677	1223	19130	53	ENSOARG00000009234,ENSOARG00000009957,ENSOARG00000006614,ENSOARG00000008057,ENSOARG00000010493,ENSOARG00000008340,ENSOARG00000013176,ENSOARG00000015180,ENSOARG00000014774,ENSOARG00000018039,ENSOARG00000018838,ENSOARG00000005792,ENSOARG00000019503,ENSOARG00000006553,ENSOARG00000015379,ENSOARG00000014623,ENSOARG00000006353,ENSOARG00000017420,ENSOARG00000009058,ENSOARG00000007984,ENSOARG00000020050,…	20	ENSOARG00000016285,ENSOARG00000004414,ENSOARG00000012667,ENSOARG00000006034,ENSOARG00000004871,ENSOARG00000001504,ENSOARG00000002366,ENSOARG00000016363,ENSOARG00000017474,ENSOARG00000006526,ENSOARG00000011865,ENSOARG00000017769,ENSOARG00000016342,ENSOARG00000006378,ENSOARG00000009675,ENSOARG00000019817,ENSOARG00000012314,ENSOARG00000005434,ENSOARG00000021001,ENSOARG00000013752
GO:0098602	single organism cell adhesion	biological_process	3.297e-21	2.5805e-18	72	677	556	19130	67	ENSOARG00000017420,ENSOARG00000013317,ENSOARG00000009250,ENSOARG00000005579,ENSOARG00000015037,ENSOARG00000016642,ENSOARG00000006301,ENSOARG00000016867,ENSOARG00000007864,ENSOARG00000012145,ENSOARG00000021177,ENSOARG00000020968,ENSOARG00000018039,ENSOARG00000015718,ENSOARG00000001254,ENSOARG00000020889,ENSOARG00000020112,ENSOARG00000008349,ENSOARG00000002699,ENSOARG00000013173,ENSOARG00000016133,…	5	ENSOARG00000000450,ENSOARG00000000417,ENSOARG00000017474,ENSOARG00000011865,ENSOARG00000014425
GO:0016477	cell migration	biological_process	1.8483e-11	3.6969e-09	72	677	849	19130	63	ENSOARG00000010521,ENSOARG00000009800,ENSOARG00000006614,ENSOARG00000015180,ENSOARG00000016133,ENSOARG00000008340,ENSOARG00000013173,ENSOARG00000006538,ENSOARG00000002699,ENSOARG00000008349,ENSOARG00000014236,ENSOARG00000015286,ENSOARG00000009000,ENSOARG00000000158,ENSOARG00000020622,ENSOARG00000014774,ENSOARG00000012064,ENSOARG00000004015,ENSOARG00000012180,ENSOARG00000008285,ENSOARG00000007229,…	9	ENSOARG00000017474,ENSOARG00000013151,ENSOARG00000013752,ENSOARG00000021001,ENSOARG00000006034,ENSOARG00000014723,ENSOARG00000000417,ENSOARG00000000450,ENSOARG00000004871
GO:0009967	positive regulation of signal transduction	biological_process	3.9225e-10	5.8358e-08	72	677	919	19130	60	ENSOARG00000010448,ENSOARG00000020968,ENSOARG00000007234,ENSOARG00000010493,ENSOARG00000008057,ENSOARG00000015180,ENSOARG00000003994,ENSOARG00000002699,ENSOARG00000020741,ENSOARG00000020889,ENSOARG00000019503,ENSOARG00000005792,ENSOARG00000015718,ENSOARG00000020622,ENSOARG00000006353,ENSOARG00000012180,ENSOARG00000007229,ENSOARG00000007525,ENSOARG00000014582,ENSOARG00000014463,ENSOARG00000021097,…	12	ENSOARG00000002260,ENSOARG00000011019,ENSOARG00000008534,ENSOARG00000004314,ENSOARG00000011865,ENSOARG00000011352,ENSOARG00000000417,ENSOARG00000008521,ENSOARG00000006378,ENSOARG00000020287,ENSOARG00000000450,ENSOARG00000004871
GO:0042325	regulation of phosphorylation	biological_process	1.9174e-09	2.4544e-07	72	677	950	19130	59	ENSOARG00000001094,ENSOARG00000001060,ENSOARG00000015592,ENSOARG00000002144,ENSOARG00000001158,ENSOARG00000004797,ENSOARG00000009682,ENSOARG00000008332,ENSOARG00000016193,ENSOARG00000008480,ENSOARG00000011437,ENSOARG00000012344,ENSOARG00000004787,ENSOARG00000012367,ENSOARG00000006358,ENSOARG00000016017,ENSOARG00000003844,ENSOARG00000002811,ENSOARG00000008984,ENSOARG00000003963,ENSOARG00000002263,…	13	ENSOARG00000002260,ENSOARG00000008554,ENSOARG00000011019,ENSOARG00000013752,ENSOARG00000021001,ENSOARG00000011128,ENSOARG00000006526,ENSOARG00000011865,ENSOARG00000011352,ENSOARG00000008521,ENSOARG00000016285,ENSOARG00000006378,ENSOARG00000020287
GO:0045595	regulation of cell differentiation	biological_process	1.586e-07	1.5351e-05	72	677	1064	19130	54	ENSOARG00000005167,ENSOARG00000007991,ENSOARG00000016790,ENSOARG00000001060,ENSOARG00000010543,ENSOARG00000015592,ENSOARG00000002144,ENSOARG00000001783,ENSOARG00000004797,ENSOARG00000014103,ENSOARG00000016193,ENSOARG00000016922,ENSOARG00000006068,ENSOARG00000011239,ENSOARG00000004787,ENSOARG00000013646,ENSOARG00000012131,ENSOARG00000019067,ENSOARG00000016017,ENSOARG00000015236,ENSOARG00000020138,…	18	ENSOARG00000017964,ENSOARG00000011019,ENSOARG00000004250,ENSOARG00000013752,ENSOARG00000011865,ENSOARG00000001487,ENSOARG00000006378,ENSOARG00000017769,ENSOARG00000006212,ENSOARG00000002555,ENSOARG00000015118,ENSOARG00000014723,ENSOARG00000006034,ENSOARG00000016764,ENSOARG00000016285,ENSOARG00000004414,ENSOARG00000011464,ENSOARG00000004871
GO:0031399	regulation of protein modification process	biological_process	9.233e-06	0.00057914	72	677	1162	19130	60	ENSOARG00000021097,ENSOARG00000014463,ENSOARG00000016937,ENSOARG00000006301,ENSOARG00000006760,ENSOARG00000020050,ENSOARG00000009653,ENSOARG00000010664,ENSOARG00000020761,ENSOARG00000012180,ENSOARG00000006353,ENSOARG00000014188,ENSOARG00000004484,ENSOARG00000008285,ENSOARG00000007229,ENSOARG00000006813,ENSOARG00000018510,ENSOARG00000016133,ENSOARG00000006538,ENSOARG00000019503,ENSOARG00000006553,…	12	ENSOARG00000001504,ENSOARG00000020287,ENSOARG00000006378,ENSOARG00000008521,ENSOARG00000011352,ENSOARG00000011865,ENSOARG00000006526,ENSOARG00000011128,ENSOARG00000021001,ENSOARG00000013752,ENSOARG00000011019,ENSOARG00000002260
GO:0046649	lymphocyte activation	biological_process	4.5557e-27	2.0404e-23	70	677	430	19130	67	ENSOARG00000016017,ENSOARG00000000571,ENSOARG00000010199,ENSOARG00000007252,ENSOARG00000021005,ENSOARG00000005236,ENSOARG00000018775,ENSOARG00000001980,ENSOARG00000020734,ENSOARG00000011944,ENSOARG00000016193,ENSOARG00000015970,ENSOARG00000019324,ENSOARG00000007525,ENSOARG00000007229,ENSOARG00000007932,ENSOARG00000000058,ENSOARG00000003782,ENSOARG00000013573,ENSOARG00000009800,ENSOARG00000021000,…	3	ENSOARG00000014425,ENSOARG00000011865,ENSOARG00000011019
GO:0098609	cell-cell adhesion	biological_process	9.8353e-18	5.2075e-15	70	677	603	19130	66	ENSOARG00000020889,ENSOARG00000020112,ENSOARG00000001254,ENSOARG00000015718,ENSOARG00000018039,ENSOARG00000008091,ENSOARG00000016133,ENSOARG00000013173,ENSOARG00000002699,ENSOARG00000020968,ENSOARG00000015037,ENSOARG00000016642,ENSOARG00000005579,ENSOARG00000021177,ENSOARG00000007864,ENSOARG00000012145,ENSOARG00000016867,ENSOARG00000006301,ENSOARG00000013317,ENSOARG00000017420,ENSOARG00000009250,…	4	ENSOARG00000017474,ENSOARG00000011865,ENSOARG00000000417,ENSOARG00000000450
GO:0016337	single organismal cell-cell adhesion	biological_process	2.7721e-21	2.2683e-18	69	677	515	19130	65	ENSOARG00000020734,ENSOARG00000016193,ENSOARG00000011944,ENSOARG00000015970,ENSOARG00000004787,ENSOARG00000004812,ENSOARG00000007252,ENSOARG00000005236,ENSOARG00000001980,ENSOARG00000018775,ENSOARG00000000571,ENSOARG00000010199,ENSOARG00000016017,ENSOARG00000009000,ENSOARG00000008340,ENSOARG00000013918,ENSOARG00000013573,ENSOARG00000005711,ENSOARG00000009800,ENSOARG00000007932,ENSOARG00000000058,…	4	ENSOARG00000000450,ENSOARG00000000417,ENSOARG00000011865,ENSOARG00000017474
GO:0006952	defense response	biological_process	5.0114e-13	1.3879e-10	69	677	782	19130	58	ENSOARG00000021005,ENSOARG00000009401,ENSOARG00000017892,ENSOARG00000020667,ENSOARG00000001158,ENSOARG00000015044,ENSOARG00000002820,ENSOARG00000016193,ENSOARG00000015177,ENSOARG00000020734,ENSOARG00000006068,ENSOARG00000025182,ENSOARG00000009682,ENSOARG00000018943,ENSOARG00000009130,ENSOARG00000003908,ENSOARG00000006139,ENSOARG00000004983,ENSOARG00000003604,Novel02027,ENSOARG00000019840,ENSOARG0…	11	ENSOARG00000000417,ENSOARG00000014824,ENSOARG00000016285,ENSOARG00000012490,ENSOARG00000000450,ENSOARG00000020519,ENSOARG00000017769,Novel02256,Novel01381,ENSOARG00000015118,ENSOARG00000021001
GO:0044093	positive regulation of molecular function	biological_process	1.9715e-07	1.8485e-05	69	677	987	19130	59	ENSOARG00000013173,ENSOARG00000006538,ENSOARG00000019218,ENSOARG00000015180,ENSOARG00000016133,ENSOARG00000015718,ENSOARG00000005792,ENSOARG00000020741,ENSOARG00000019503,ENSOARG00000011933,ENSOARG00000014926,ENSOARG00000008057,ENSOARG00000010448,ENSOARG00000006760,ENSOARG00000006301,ENSOARG00000016937,ENSOARG00000003782,ENSOARG00000020761,ENSOARG00000005443,ENSOARG00000018510,ENSOARG00000004484,…	10	ENSOARG00000002260,ENSOARG00000017474,ENSOARG00000020287,ENSOARG00000019235,ENSOARG00000000450,ENSOARG00000000417,ENSOARG00000011352,ENSOARG00000006526,ENSOARG00000011865,ENSOARG00000008521
GO:0051254	positive regulation of RNA metabolic process	biological_process	5.8287e-05	0.0028669	68	677	1137	19130	49	ENSOARG00000012344,ENSOARG00000008705,ENSOARG00000017214,ENSOARG00000006068,ENSOARG00000009172,ENSOARG00000001783,ENSOARG00000013482,ENSOARG00000004797,ENSOARG00000016334,ENSOARG00000015044,ENSOARG00000012360,ENSOARG00000015727,ENSOARG00000017631,ENSOARG00000009999,ENSOARG00000017265,ENSOARG00000001574,ENSOARG00000011146,ENSOARG00000014822,ENSOARG00000014762,ENSOARG00000004403,ENSOARG00000019067,…	19	ENSOARG00000004871,ENSOARG00000001504,ENSOARG00000012667,ENSOARG00000006034,ENSOARG00000016285,ENSOARG00000004414,ENSOARG00000016363,ENSOARG00000017474,ENSOARG00000002366,ENSOARG00000016342,ENSOARG00000006378,ENSOARG00000017769,ENSOARG00000011865,ENSOARG00000013752,ENSOARG00000005434,ENSOARG00000012314,ENSOARG00000021001,ENSOARG00000019817,ENSOARG00000009675
GO:0042981	regulation of apoptotic process	biological_process	1.9003e-08	2.0732e-06	67	677	911	19130	55	ENSOARG00000020050,ENSOARG00000014364,ENSOARG00000016937,ENSOARG00000001202,ENSOARG00000017562,ENSOARG00000018510,ENSOARG00000007229,ENSOARG00000006353,ENSOARG00000014582,ENSOARG00000017420,ENSOARG00000019324,ENSOARG00000007525,ENSOARG00000007984,ENSOARG00000002699,ENSOARG00000003994,ENSOARG00000013173,ENSOARG00000017034,ENSOARG00000016133,ENSOARG00000018039,ENSOARG00000004015,ENSOARG00000015167,…	12	ENSOARG00000000450,ENSOARG00000017769,ENSOARG00000000417,ENSOARG00000014425,ENSOARG00000016764,ENSOARG00000019395,ENSOARG00000013752,ENSOARG00000007493,ENSOARG00000015118,ENSOARG00000004314,ENSOARG00000013151,ENSOARG00000011019
GO:0043067	regulation of programmed cell death	biological_process	2.849e-08	3.0896e-06	67	677	921	19130	55	ENSOARG00000020138,ENSOARG00000003604,ENSOARG00000012131,ENSOARG00000010939,ENSOARG00000006358,ENSOARG00000009999,ENSOARG00000010199,ENSOARG00000008908,ENSOARG00000009599,ENSOARG00000006007,ENSOARG00000000123,ENSOARG00000015592,ENSOARG00000018189,ENSOARG00000019197,ENSOARG00000017892,ENSOARG00000001060,ENSOARG00000017214,ENSOARG00000005846,ENSOARG00000014750,ENSOARG00000006421,ENSOARG00000004787,…	12	ENSOARG00000011019,ENSOARG00000013151,ENSOARG00000013752,ENSOARG00000007493,ENSOARG00000015118,ENSOARG00000004314,ENSOARG00000016764,ENSOARG00000019395,ENSOARG00000000417,ENSOARG00000014425,ENSOARG00000000450,ENSOARG00000017769
GO:0051247	positive regulation of protein metabolic process	biological_process	8.0772e-08	8.1688e-06	67	677	945	19130	54	ENSOARG00000005792,ENSOARG00000019503,ENSOARG00000020889,ENSOARG00000020741,ENSOARG00000018039,ENSOARG00000015718,ENSOARG00000016133,ENSOARG00000006538,ENSOARG00000010448,ENSOARG00000020968,ENSOARG00000008057,ENSOARG00000015037,ENSOARG00000017205,ENSOARG00000020761,ENSOARG00000010664,ENSOARG00000001202,ENSOARG00000014463,ENSOARG00000021097,ENSOARG00000006760,ENSOARG00000006301,ENSOARG00000020050,…	13	ENSOARG00000011352,ENSOARG00000000417,ENSOARG00000011865,ENSOARG00000006526,ENSOARG00000008521,ENSOARG00000020287,ENSOARG00000006378,ENSOARG00000000450,ENSOARG00000001504,ENSOARG00000002260,ENSOARG00000011019,ENSOARG00000002366,ENSOARG00000021001
GO:0010941	regulation of cell death	biological_process	1.6105e-07	1.5504e-05	67	677	966	19130	55	ENSOARG00000009800,ENSOARG00000009256,ENSOARG00000010448,ENSOARG00000007234,ENSOARG00000010493,ENSOARG00000003994,ENSOARG00000013173,ENSOARG00000002699,ENSOARG00000016133,ENSOARG00000017034,ENSOARG00000012299,ENSOARG00000015718,ENSOARG00000014774,ENSOARG00000018039,ENSOARG00000004015,ENSOARG00000015167,ENSOARG00000020741,ENSOARG00000007229,ENSOARG00000018510,ENSOARG00000006353,ENSOARG00000014582,…	12	ENSOARG00000007493,ENSOARG00000015118,ENSOARG00000013752,ENSOARG00000004314,ENSOARG00000013151,ENSOARG00000011019,ENSOARG00000017769,ENSOARG00000000450,ENSOARG00000014425,ENSOARG00000000417,ENSOARG00000019395,ENSOARG00000016764
GO:0001932	regulation of protein phosphorylation	biological_process	1.0787e-08	1.2291e-06	66	677	874	19130	55	ENSOARG00000006813,ENSOARG00000007229,ENSOARG00000018510,ENSOARG00000006353,ENSOARG00000012180,ENSOARG00000014188,ENSOARG00000004484,ENSOARG00000016937,ENSOARG00000020050,ENSOARG00000006760,ENSOARG00000006301,ENSOARG00000014463,ENSOARG00000021097,ENSOARG00000009653,ENSOARG00000020761,ENSOARG00000010664,ENSOARG00000008189,ENSOARG00000008057,ENSOARG00000020968,ENSOARG00000010493,ENSOARG00000010448,…	11	ENSOARG00000020287,ENSOARG00000006378,ENSOARG00000011352,ENSOARG00000011865,ENSOARG00000006526,ENSOARG00000008521,ENSOARG00000013752,ENSOARG00000011128,ENSOARG00000021001,ENSOARG00000002260,ENSOARG00000011019
GO:0045893	positive regulation of transcription, DNA-templated	biological_process	7.4159e-05	0.0035132	66	677	1103	19130	47	ENSOARG00000018838,ENSOARG00000014774,ENSOARG00000018039,ENSOARG00000019503,ENSOARG00000015379,ENSOARG00000006553,ENSOARG00000005792,ENSOARG00000015180,ENSOARG00000013176,ENSOARG00000008340,ENSOARG00000008057,ENSOARG00000006614,ENSOARG00000010493,ENSOARG00000009957,ENSOARG00000009234,ENSOARG00000004499,ENSOARG00000007763,ENSOARG00000017562,ENSOARG00000012094,ENSOARG00000016937,ENSOARG00000020050,…	19	ENSOARG00000016285,ENSOARG00000004414,ENSOARG00000012667,ENSOARG00000006034,ENSOARG00000004871,ENSOARG00000001504,ENSOARG00000002366,ENSOARG00000016363,ENSOARG00000017474,ENSOARG00000011865,ENSOARG00000017769,ENSOARG00000016342,ENSOARG00000006378,ENSOARG00000009675,ENSOARG00000019817,ENSOARG00000012314,ENSOARG00000005434,ENSOARG00000021001,ENSOARG00000013752
GO:1903508	positive regulation of nucleic acid-templated transcription	biological_process	7.4159e-05	0.0035132	66	677	1103	19130	47	ENSOARG00000017631,ENSOARG00000015727,ENSOARG00000012360,ENSOARG00000015044,ENSOARG00000016334,ENSOARG00000004797,ENSOARG00000013482,ENSOARG00000009172,ENSOARG00000001783,ENSOARG00000017214,ENSOARG00000008705,ENSOARG00000012344,ENSOARG00000019067,ENSOARG00000012131,ENSOARG00000010939,ENSOARG00000004403,ENSOARG00000014762,ENSOARG00000011146,ENSOARG00000014822,ENSOARG00000017265,ENSOARG00000009999,…	19	ENSOARG00000011865,ENSOARG00000017769,ENSOARG00000016342,ENSOARG00000006378,ENSOARG00000009675,ENSOARG00000019817,ENSOARG00000012314,ENSOARG00000005434,ENSOARG00000021001,ENSOARG00000013752,ENSOARG00000016285,ENSOARG00000004414,ENSOARG00000012667,ENSOARG00000006034,ENSOARG00000004871,ENSOARG00000001504,ENSOARG00000002366,ENSOARG00000016363,ENSOARG00000017474
GO:1902680	positive regulation of RNA biosynthetic process	biological_process	7.8611e-05	0.0036757	66	677	1105	19130	47	ENSOARG00000015044,ENSOARG00000012360,ENSOARG00000015727,ENSOARG00000017631,ENSOARG00000012344,ENSOARG00000008705,ENSOARG00000017214,ENSOARG00000013482,ENSOARG00000009172,ENSOARG00000001783,ENSOARG00000004797,ENSOARG00000016334,ENSOARG00000004403,ENSOARG00000019067,ENSOARG00000012131,ENSOARG00000010939,ENSOARG00000009999,ENSOARG00000017265,ENSOARG00000014822,ENSOARG00000011146,ENSOARG00000014762,…	19	ENSOARG00000001504,ENSOARG00000004871,ENSOARG00000006034,ENSOARG00000012667,ENSOARG00000004414,ENSOARG00000016285,ENSOARG00000017474,ENSOARG00000016363,ENSOARG00000002366,ENSOARG00000016342,ENSOARG00000006378,ENSOARG00000017769,ENSOARG00000011865,ENSOARG00000013752,ENSOARG00000021001,ENSOARG00000012314,ENSOARG00000005434,ENSOARG00000019817,ENSOARG00000009675
GO:0051094	positive regulation of developmental process	biological_process	8.3708e-09	9.7851e-07	64	677	825	19130	50	ENSOARG00000018775,ENSOARG00000010543,ENSOARG00000015592,ENSOARG00000001060,ENSOARG00000017631,ENSOARG00000011239,ENSOARG00000000405,ENSOARG00000016922,ENSOARG00000014103,ENSOARG00000013482,ENSOARG00000009827,ENSOARG00000001783,ENSOARG00000004797,ENSOARG00000002263,ENSOARG00000020138,ENSOARG00000008984,ENSOARG00000016017,ENSOARG00000013646,ENSOARG00000019067,ENSOARG00000010199,ENSOARG00000017093,…	14	ENSOARG00000006378,ENSOARG00000016342,ENSOARG00000000322,ENSOARG00000004871,ENSOARG00000011464,ENSOARG00000004414,ENSOARG00000016764,ENSOARG00000015118,ENSOARG00000013752,ENSOARG00000021001,ENSOARG00000017964,ENSOARG00000006212,ENSOARG00000011019,ENSOARG00000013151
GO:0009887	organ morphogenesis	biological_process	3.5686e-09	4.4304e-07	63	677	783	19130	42	ENSOARG00000004403,ENSOARG00000016622,ENSOARG00000019067,ENSOARG00000010939,ENSOARG00000008507,ENSOARG00000009999,ENSOARG00000017093,ENSOARG00000007134,ENSOARG00000009599,ENSOARG00000006007,ENSOARG00000014822,ENSOARG00000002790,ENSOARG00000016306,ENSOARG00000013669,ENSOARG00000004787,ENSOARG00000018528,ENSOARG00000014898,ENSOARG00000004797,ENSOARG00000006813,ENSOARG00000014623,ENSOARG00000008249,…	21	ENSOARG00000016342,ENSOARG00000017964,ENSOARG00000002260,ENSOARG00000011056,ENSOARG00000013151,ENSOARG00000004312,ENSOARG00000013752,ENSOARG00000021001,ENSOARG00000011128,ENSOARG00000006034,ENSOARG00000012667,ENSOARG00000019395,ENSOARG00000016764,ENSOARG00000020376,ENSOARG00000005781,ENSOARG00000002449,ENSOARG00000004871,ENSOARG00000016363,ENSOARG00000002366,ENSOARG00000008534,ENSOARG00000015118
GO:0051049	regulation of transport	biological_process	0.00042553	0.014536	63	677	1125	19130	52	ENSOARG00000015044,ENSOARG00000017892,ENSOARG00000009401,ENSOARG00000017631,ENSOARG00000020667,ENSOARG00000011437,ENSOARG00000008893,ENSOARG00000004208,ENSOARG00000004797,ENSOARG00000008480,ENSOARG00000016193,ENSOARG00000013509,ENSOARG00000020138,ENSOARG00000006979,ENSOARG00000019670,ENSOARG00000005322,ENSOARG00000003604,ENSOARG00000015215,ENSOARG00000006737,ENSOARG00000006358,ENSOARG00000010939,…	11	ENSOARG00000017474,ENSOARG00000001444,ENSOARG00000005434,ENSOARG00000004312,ENSOARG00000002386,ENSOARG00000006526,ENSOARG00000014425,ENSOARG00000000417,ENSOARG00000001504,ENSOARG00000000450,ENSOARG00000000322
GO:0032270	positive regulation of cellular protein metabolic process	biological_process	1.6476e-07	1.561e-05	62	677	864	19130	49	ENSOARG00000016937,ENSOARG00000006301,ENSOARG00000020050,ENSOARG00000006760,ENSOARG00000021097,ENSOARG00000014463,ENSOARG00000001202,ENSOARG00000020761,ENSOARG00000010664,ENSOARG00000017205,ENSOARG00000007229,ENSOARG00000006813,ENSOARG00000018510,ENSOARG00000012180,ENSOARG00000006353,ENSOARG00000008285,ENSOARG00000014582,ENSOARG00000006538,ENSOARG00000016133,ENSOARG00000015718,ENSOARG00000018039,…	13	ENSOARG00000008521,ENSOARG00000006526,ENSOARG00000011865,ENSOARG00000000417,ENSOARG00000011352,ENSOARG00000001504,ENSOARG00000000450,ENSOARG00000006378,ENSOARG00000020287,ENSOARG00000011019,ENSOARG00000002366,ENSOARG00000002260,ENSOARG00000021001
GO:0002684	positive regulation of immune system process	biological_process	1.3054e-17	6.714e-15	61	677	493	19130	59	ENSOARG00000006813,ENSOARG00000007229,ENSOARG00000003254,ENSOARG00000017420,ENSOARG00000007525,ENSOARG00000019324,ENSOARG00000002039,ENSOARG00000020050,ENSOARG00000006301,ENSOARG00000003782,ENSOARG00000007932,ENSOARG00000009301,ENSOARG00000000058,ENSOARG00000015037,ENSOARG00000009800,ENSOARG00000010521,ENSOARG00000008057,ENSOARG00000020968,ENSOARG00000002699,ENSOARG00000016133,ENSOARG00000013918,…	2	ENSOARG00000011019,ENSOARG00000014723
GO:0023057	negative regulation of signaling	biological_process	1.1103e-07	1.0982e-05	61	677	824	19130	53	ENSOARG00000004086,ENSOARG00000009341,ENSOARG00000005075,ENSOARG00000010493,ENSOARG00000010448,ENSOARG00000015180,ENSOARG00000002699,ENSOARG00000005792,ENSOARG00000020889,ENSOARG00000016042,ENSOARG00000018039,ENSOARG00000014774,ENSOARG00000012299,ENSOARG00000008285,ENSOARG00000014188,ENSOARG00000004484,ENSOARG00000014623,ENSOARG00000006353,ENSOARG00000018510,ENSOARG00000007229,ENSOARG00000019324,…	8	ENSOARG00000006378,ENSOARG00000001504,ENSOARG00000002386,ENSOARG00000016764,ENSOARG00000016285,ENSOARG00000013752,ENSOARG00000015118,ENSOARG00000002260
GO:0010648	negative regulation of cell communication	biological_process	1.8004e-07	1.6969e-05	61	677	835	19130	53	ENSOARG00000002144,ENSOARG00000001980,ENSOARG00000018775,ENSOARG00000002790,ENSOARG00000018189,ENSOARG00000004797,ENSOARG00000015970,ENSOARG00000004208,ENSOARG00000005007,ENSOARG00000016922,ENSOARG00000011437,ENSOARG00000004787,ENSOARG00000009791,ENSOARG00000016622,ENSOARG00000011110,ENSOARG00000010080,ENSOARG00000008984,ENSOARG00000003963,ENSOARG00000020030,ENSOARG00000000571,ENSOARG00000011146,…	8	ENSOARG00000006378,ENSOARG00000001504,ENSOARG00000016285,ENSOARG00000016764,ENSOARG00000002386,ENSOARG00000015118,ENSOARG00000013752,ENSOARG00000002260
GO:0007159	leukocyte cell-cell adhesion	biological_process	7.7651e-26	1.997e-22	60	677	332	19130	57	ENSOARG00000016017,ENSOARG00000010939,ENSOARG00000013646,ENSOARG00000012367,ENSOARG00000004983,ENSOARG00000003604,ENSOARG00000008984,ENSOARG00000016138,ENSOARG00000008908,ENSOARG00000000571,ENSOARG00000014822,ENSOARG00000010199,ENSOARG00000003028,ENSOARG00000011171,ENSOARG00000005236,ENSOARG00000007252,ENSOARG00000009401,ENSOARG00000001158,ENSOARG00000001980,ENSOARG00000018775,ENSOARG00000010543,…	3	ENSOARG00000000450,ENSOARG00000000417,ENSOARG00000011865
GO:0051336	regulation of hydrolase activity	biological_process	4.2582e-08	4.5358e-06	59	677	767	19130	52	ENSOARG00000011933,ENSOARG00000018210,ENSOARG00000020741,ENSOARG00000018337,ENSOARG00000019218,ENSOARG00000006538,ENSOARG00000013173,ENSOARG00000002699,ENSOARG00000016133,ENSOARG00000019971,ENSOARG00000015144,ENSOARG00000014582,ENSOARG00000005443,ENSOARG00000018510,ENSOARG00000012180,ENSOARG00000008285,ENSOARG00000004484,ENSOARG00000001568,ENSOARG00000009653,ENSOARG00000016937,ENSOARG00000006760,…	7	ENSOARG00000000417,ENSOARG00000011865,ENSOARG00000006526,ENSOARG00000004312,ENSOARG00000007493,ENSOARG00000020519,ENSOARG00000000450
GO:0034109	homotypic cell-cell adhesion	biological_process	4.3709e-22	4.3714e-19	58	677	364	19130	54	ENSOARG00000015037,ENSOARG00000000058,ENSOARG00000007932,ENSOARG00000005579,ENSOARG00000003782,ENSOARG00000007864,ENSOARG00000012145,ENSOARG00000021177,ENSOARG00000006301,ENSOARG00000017420,ENSOARG00000009250,ENSOARG00000007229,ENSOARG00000009000,ENSOARG00000020889,ENSOARG00000020112,ENSOARG00000018039,ENSOARG00000015718,ENSOARG00000008340,ENSOARG00000013918,ENSOARG00000008091,ENSOARG00000016133,…	4	ENSOARG00000000450,ENSOARG00000017474,ENSOARG00000011865,ENSOARG00000000417
GO:0002520	immune system development	biological_process	2.3806e-10	3.7266e-08	58	677	653	19130	54	ENSOARG00000008208,ENSOARG00000015718,ENSOARG00000004015,ENSOARG00000006553,ENSOARG00000009000,ENSOARG00000002960,ENSOARG00000008091,ENSOARG00000016133,ENSOARG00000013176,ENSOARG00000008340,ENSOARG00000004628,ENSOARG00000020968,ENSOARG00000009800,ENSOARG00000018615,ENSOARG00000001138,ENSOARG00000005579,ENSOARG00000000058,ENSOARG00000006301,ENSOARG00000020050,ENSOARG00000021177,ENSOARG00000003782,…	4	ENSOARG00000011019,ENSOARG00000004414,ENSOARG00000014425,ENSOARG00000011865
GO:0009968	negative regulation of signal transduction	biological_process	1.3823e-07	1.3524e-05	58	677	770	19130	52	ENSOARG00000002699,ENSOARG00000015180,ENSOARG00000012299,ENSOARG00000018039,ENSOARG00000014774,ENSOARG00000020889,ENSOARG00000016042,ENSOARG00000005792,ENSOARG00000005075,ENSOARG00000009341,ENSOARG00000004086,ENSOARG00000010493,ENSOARG00000010448,ENSOARG00000014463,ENSOARG00000009653,ENSOARG00000015037,ENSOARG00000007229,ENSOARG00000018510,ENSOARG00000014623,ENSOARG00000014188,ENSOARG00000004484,…	6	ENSOARG00000002260,ENSOARG00000002386,ENSOARG00000016285,ENSOARG00000016764,ENSOARG00000006378,ENSOARG00000013752
GO:0032989	cellular component morphogenesis	biological_process	0.00023086	0.0086762	58	677	944	19130	48	ENSOARG00000001060,ENSOARG00000012355,ENSOARG00000002790,ENSOARG00000002144,ENSOARG00000010543,ENSOARG00000009972,ENSOARG00000005007,ENSOARG00000004797,ENSOARG00000011239,ENSOARG00000004787,ENSOARG00000006421,ENSOARG00000004812,ENSOARG00000003844,ENSOARG00000019067,ENSOARG00000010939,ENSOARG00000010473,ENSOARG00000006358,ENSOARG00000003604,ENSOARG00000020138,ENSOARG00000006007,ENSOARG00000018226,…	10	ENSOARG00000003149,ENSOARG00000006212,ENSOARG00000013752,ENSOARG00000015118,ENSOARG00000011865,ENSOARG00000006034,ENSOARG00000014425,ENSOARG00000001487,ENSOARG00000004871,ENSOARG00000011464
GO:0070486	leukocyte aggregation	biological_process	3.9662e-25	8.925e-22	57	677	310	19130	54	ENSOARG00000013573,ENSOARG00000020968,ENSOARG00000009800,ENSOARG00000018039,ENSOARG00000015718,ENSOARG00000020889,ENSOARG00000020112,ENSOARG00000009000,ENSOARG00000002699,ENSOARG00000013173,ENSOARG00000008340,ENSOARG00000013918,ENSOARG00000008091,ENSOARG00000016133,ENSOARG00000017420,ENSOARG00000009250,ENSOARG00000007229,ENSOARG00000007932,ENSOARG00000005579,ENSOARG00000000058,ENSOARG00000015037,…	3	ENSOARG00000000417,ENSOARG00000011865,ENSOARG00000000450
GO:0048534	hematopoietic or lymphoid organ development	biological_process	6.8487e-11	1.1832e-08	57	677	617	19130	53	ENSOARG00000010199,ENSOARG00000003028,ENSOARG00000009999,ENSOARG00000011171,ENSOARG00000000571,ENSOARG00000014822,ENSOARG00000003422,ENSOARG00000008984,ENSOARG00000006358,ENSOARG00000012131,ENSOARG00000013646,ENSOARG00000011239,ENSOARG00000016922,ENSOARG00000006068,ENSOARG00000005007,ENSOARG00000020734,ENSOARG00000004208,ENSOARG00000001783,ENSOARG00000009172,ENSOARG00000010543,ENSOARG00000015592,…	4	ENSOARG00000011019,ENSOARG00000004414,ENSOARG00000014425,ENSOARG00000011865
GO:0072358	cardiovascular system development	biological_process	8.9282e-09	1.0303e-06	57	677	686	19130	50	ENSOARG00000012373,ENSOARG00000001060,ENSOARG00000016790,ENSOARG00000012515,ENSOARG00000017631,ENSOARG00000019963,ENSOARG00000013669,ENSOARG00000012360,ENSOARG00000016922,ENSOARG00000016193,ENSOARG00000016334,ENSOARG00000014898,ENSOARG00000009827,ENSOARG00000004787,ENSOARG00000000405,ENSOARG00000003844,ENSOARG00000019067,ENSOARG00000002263,ENSOARG00000000123,ENSOARG00000010199,ENSOARG00000009999,…	7	ENSOARG00000011865,ENSOARG00000002366,ENSOARG00000008534,ENSOARG00000004312,ENSOARG00000013752,ENSOARG00000017769,ENSOARG00000004871
GO:0072359	circulatory system development	biological_process	8.9282e-09	1.0303e-06	57	677	686	19130	50	ENSOARG00000018039,ENSOARG00000016047,ENSOARG00000006553,ENSOARG00000020889,ENSOARG00000016042,ENSOARG00000021018,ENSOARG00000014361,ENSOARG00000014123,ENSOARG00000006614,ENSOARG00000010448,ENSOARG00000011235,ENSOARG00000011933,ENSOARG00000005579,ENSOARG00000017562,ENSOARG00000017807,ENSOARG00000005365,ENSOARG00000016867,ENSOARG00000017465,ENSOARG00000021177,ENSOARG00000017420,ENSOARG00000020233,…	7	ENSOARG00000011865,ENSOARG00000008534,ENSOARG00000002366,ENSOARG00000004312,ENSOARG00000013752,ENSOARG00000004871,ENSOARG00000017769
GO:0000902	cell morphogenesis	biological_process	7.3024e-05	0.0034821	57	677	880	19130	47	ENSOARG00000017560,ENSOARG00000007525,ENSOARG00000007984,ENSOARG00000020233,ENSOARG00000017420,ENSOARG00000011756,ENSOARG00000007763,ENSOARG00000016642,ENSOARG00000020761,ENSOARG00000005579,ENSOARG00000004499,ENSOARG00000006760,ENSOARG00000016867,ENSOARG00000007452,ENSOARG00000016857,ENSOARG00000020889,ENSOARG00000019503,ENSOARG00000015379,ENSOARG00000015286,ENSOARG00000020622,ENSOARG00000018039,…	10	ENSOARG00000001487,ENSOARG00000011464,ENSOARG00000004871,ENSOARG00000011865,ENSOARG00000014425,ENSOARG00000006034,ENSOARG00000013752,ENSOARG00000015118,ENSOARG00000006212,ENSOARG00000003149
GO:0006935	chemotaxis	biological_process	2.1281e-21	1.8243e-18	56	677	355	19130	46	ENSOARG00000006421,ENSOARG00000004787,ENSOARG00000004721,ENSOARG00000001060,ENSOARG00000010543,ENSOARG00000002790,ENSOARG00000011146,ENSOARG00000006007,ENSOARG00000000123,ENSOARG00000014277,ENSOARG00000003028,ENSOARG00000010199,ENSOARG00000010462,ENSOARG00000012367,ENSOARG00000010939,ENSOARG00000006358,ENSOARG00000019840,ENSOARG00000004983,ENSOARG00000003604,ENSOARG00000014236,ENSOARG00000015286,…	10	ENSOARG00000000450,ENSOARG00000001487,ENSOARG00000000417,ENSOARG00000011865,ENSOARG00000014723,ENSOARG00000021001,ENSOARG00000015118,ENSOARG00000013752,ENSOARG00000013151,ENSOARG00000003149
GO:0042330	taxis	biological_process	2.1281e-21	1.8243e-18	56	677	355	19130	46	ENSOARG00000004721,ENSOARG00000001060,ENSOARG00000010543,ENSOARG00000002790,ENSOARG00000004787,ENSOARG00000006421,ENSOARG00000006358,ENSOARG00000010939,ENSOARG00000012367,ENSOARG00000019840,ENSOARG00000003604,ENSOARG00000004983,ENSOARG00000011146,ENSOARG00000000123,ENSOARG00000014277,ENSOARG00000006007,ENSOARG00000010462,ENSOARG00000010199,ENSOARG00000003028,ENSOARG00000010521,ENSOARG00000009800,…	10	ENSOARG00000000417,ENSOARG00000014723,ENSOARG00000011865,ENSOARG00000000450,ENSOARG00000001487,ENSOARG00000013151,ENSOARG00000003149,ENSOARG00000021001,ENSOARG00000013752,ENSOARG00000015118
GO:0043085	positive regulation of catalytic activity	biological_process	2.7487e-06	0.00020878	56	677	786	19130	47	ENSOARG00000003028,ENSOARG00000009999,ENSOARG00000011171,ENSOARG00000003798,ENSOARG00000019876,ENSOARG00000008908,ENSOARG00000020818,ENSOARG00000014762,ENSOARG00000014288,ENSOARG00000004983,ENSOARG00000020437,ENSOARG00000016017,ENSOARG00000003844,ENSOARG00000006358,ENSOARG00000012344,ENSOARG00000016888,ENSOARG00000016922,ENSOARG00000020214,ENSOARG00000005926,ENSOARG00000001158,ENSOARG00000008161,…	9	ENSOARG00000002260,ENSOARG00000000450,ENSOARG00000020287,ENSOARG00000019235,ENSOARG00000008521,ENSOARG00000011352,ENSOARG00000000417,ENSOARG00000006526,ENSOARG00000011865
GO:0030097	hemopoiesis	biological_process	6.6148e-11	1.179e-08	55	677	581	19130	51	ENSOARG00000002960,ENSOARG00000008340,ENSOARG00000013176,ENSOARG00000016133,ENSOARG00000008091,ENSOARG00000015718,ENSOARG00000008208,ENSOARG00000006553,ENSOARG00000009000,ENSOARG00000018615,ENSOARG00000009800,ENSOARG00000004628,ENSOARG00000020968,ENSOARG00000020050,ENSOARG00000006301,ENSOARG00000003782,ENSOARG00000021177,ENSOARG00000005579,ENSOARG00000001138,ENSOARG00000000058,ENSOARG00000007229,…	4	ENSOARG00000011019,ENSOARG00000004414,ENSOARG00000014425,ENSOARG00000011865
GO:0051241	negative regulation of multicellular organismal process	biological_process	4.7876e-08	5.0401e-06	55	677	700	19130	45	ENSOARG00000017562,ENSOARG00000011939,ENSOARG00000009653,ENSOARG00000005579,ENSOARG00000017465,ENSOARG00000014463,ENSOARG00000006760,ENSOARG00000016937,ENSOARG00000019324,ENSOARG00000007525,ENSOARG00000014582,ENSOARG00000017420,ENSOARG00000019971,ENSOARG00000008249,ENSOARG00000014188,ENSOARG00000007229,ENSOARG00000005792,ENSOARG00000000158,ENSOARG00000015286,ENSOARG00000018039,ENSOARG00000002053,…	10	ENSOARG00000001487,ENSOARG00000017769,ENSOARG00000020519,ENSOARG00000011865,ENSOARG00000002386,ENSOARG00000016285,ENSOARG00000016764,ENSOARG00000013752,ENSOARG00000015118,ENSOARG00000017964
GO:0009790	embryo development	biological_process	8.0262e-05	0.0037239	55	677	863	19130	35	ENSOARG00000016622,ENSOARG00000010939,ENSOARG00000019067,ENSOARG00000012367,ENSOARG00000015236,ENSOARG00000010080,ENSOARG00000007134,ENSOARG00000008715,ENSOARG00000009599,ENSOARG00000012515,ENSOARG00000015592,ENSOARG00000016922,ENSOARG00000014103,ENSOARG00000009682,ENSOARG00000004787,ENSOARG00000002307,ENSOARG00000017420,ENSOARG00000020233,ENSOARG00000011660,ENSOARG00000013317,ENSOARG00000006813,…	20	ENSOARG00000011056,ENSOARG00000002260,ENSOARG00000017964,ENSOARG00000009675,ENSOARG00000017394,ENSOARG00000013752,ENSOARG00000012314,ENSOARG00000016342,ENSOARG00000017769,ENSOARG00000006212,ENSOARG00000008534,ENSOARG00000002366,ENSOARG00000006034,ENSOARG00000016764,ENSOARG00000019395,ENSOARG00000004414,ENSOARG00000005781,ENSOARG00000020376,ENSOARG00000004871,ENSOARG00000001159
GO:0048646	anatomical structure formation involved in morphogenesis	biological_process	0.00034747	0.012386	55	677	910	19130	48	ENSOARG00000019663,ENSOARG00000006614,ENSOARG00000016857,ENSOARG00000015379,ENSOARG00000002223,ENSOARG00000016042,ENSOARG00000006553,ENSOARG00000018039,ENSOARG00000002699,ENSOARG00000014361,ENSOARG00000017875,ENSOARG00000013317,ENSOARG00000017420,ENSOARG00000014582,ENSOARG00000014623,ENSOARG00000012180,ENSOARG00000006813,ENSOARG00000017562,ENSOARG00000017807,ENSOARG00000004499,ENSOARG00000005579,…	7	ENSOARG00000004871,ENSOARG00000001159,ENSOARG00000005781,ENSOARG00000013752,ENSOARG00000016342,ENSOARG00000006034,ENSOARG00000017964
GO:0010562	positive regulation of phosphorus metabolic process	biological_process	1.898e-08	2.0732e-06	54	677	663	19130	45	ENSOARG00000012180,ENSOARG00000006353,ENSOARG00000008285,ENSOARG00000007229,ENSOARG00000006813,ENSOARG00000018510,ENSOARG00000017199,ENSOARG00000021097,ENSOARG00000014463,ENSOARG00000016937,ENSOARG00000020050,ENSOARG00000006760,ENSOARG00000006301,ENSOARG00000017562,ENSOARG00000010664,ENSOARG00000020761,ENSOARG00000014926,ENSOARG00000020968,ENSOARG00000019663,ENSOARG00000010448,ENSOARG00000008057,…	9	ENSOARG00000021001,ENSOARG00000011019,ENSOARG00000002260,ENSOARG00000006378,ENSOARG00000020287,ENSOARG00000008521,ENSOARG00000006526,ENSOARG00000011865,ENSOARG00000011352
GO:0045937	positive regulation of phosphate metabolic process	biological_process	1.898e-08	2.0732e-06	54	677	663	19130	45	ENSOARG00000012344,ENSOARG00000000405,ENSOARG00000016193,ENSOARG00000008480,ENSOARG00000009682,ENSOARG00000008332,ENSOARG00000008232,ENSOARG00000001158,ENSOARG00000015592,ENSOARG00000001060,ENSOARG00000001094,ENSOARG00000003112,ENSOARG00000003798,ENSOARG00000014762,ENSOARG00000008984,ENSOARG00000003844,ENSOARG00000016017,ENSOARG00000006358,ENSOARG00000006538,ENSOARG00000016133,ENSOARG00000018039,…	9	ENSOARG00000002260,ENSOARG00000011019,ENSOARG00000021001,ENSOARG00000011352,ENSOARG00000006526,ENSOARG00000011865,ENSOARG00000008521,ENSOARG00000020287,ENSOARG00000006378
GO:0042110	T cell activation	biological_process	2.2413e-22	2.5217e-19	53	677	303	19130	52	ENSOARG00000017420,ENSOARG00000009250,ENSOARG00000007229,ENSOARG00000015037,ENSOARG00000000058,ENSOARG00000007932,ENSOARG00000005579,ENSOARG00000007864,ENSOARG00000012145,ENSOARG00000003782,ENSOARG00000021177,ENSOARG00000006301,ENSOARG00000020968,ENSOARG00000013573,ENSOARG00000009800,ENSOARG00000009000,ENSOARG00000020889,ENSOARG00000020112,ENSOARG00000015718,ENSOARG00000008340,ENSOARG00000016133,…	1	ENSOARG00000011865
GO:0070489	T cell aggregation	biological_process	2.2413e-22	2.5217e-19	53	677	303	19130	52	ENSOARG00000009800,ENSOARG00000013573,ENSOARG00000020968,ENSOARG00000002699,ENSOARG00000013173,ENSOARG00000008340,ENSOARG00000013918,ENSOARG00000008091,ENSOARG00000016133,ENSOARG00000015718,ENSOARG00000009000,ENSOARG00000020889,ENSOARG00000020112,ENSOARG00000009250,ENSOARG00000007229,ENSOARG00000017420,ENSOARG00000006301,ENSOARG00000003782,ENSOARG00000007864,ENSOARG00000012145,ENSOARG00000021177,…	1	ENSOARG00000011865
GO:0071593	lymphocyte aggregation	biological_process	2.713e-22	2.8729e-19	53	677	304	19130	52	ENSOARG00000020734,ENSOARG00000016193,ENSOARG00000011944,ENSOARG00000013509,ENSOARG00000009172,ENSOARG00000015970,ENSOARG00000011239,ENSOARG00000007252,ENSOARG00000005236,ENSOARG00000009401,ENSOARG00000001980,ENSOARG00000018775,ENSOARG00000001158,ENSOARG00000010543,ENSOARG00000008908,ENSOARG00000000571,ENSOARG00000014822,ENSOARG00000003028,ENSOARG00000010199,ENSOARG00000011171,ENSOARG00000016017,…	1	ENSOARG00000011865
GO:1902533	positive regulation of intracellular signal transduction	biological_process	1.9224e-09	2.4544e-07	53	677	603	19130	45	ENSOARG00000007525,ENSOARG00000014582,ENSOARG00000012180,ENSOARG00000006353,ENSOARG00000007229,ENSOARG00000017562,ENSOARG00000010664,ENSOARG00000020761,ENSOARG00000021097,ENSOARG00000014463,ENSOARG00000006301,ENSOARG00000006760,ENSOARG00000020050,ENSOARG00000016937,ENSOARG00000020968,ENSOARG00000010448,ENSOARG00000007234,ENSOARG00000008057,ENSOARG00000005792,ENSOARG00000020889,ENSOARG00000020741,…	8	ENSOARG00000008521,ENSOARG00000011865,ENSOARG00000011352,ENSOARG00000000417,ENSOARG00000000450,ENSOARG00000020287,ENSOARG00000011019,ENSOARG00000002260
GO:0060429	epithelium development	biological_process	0.0002232	0.0084237	53	677	868	19130	38	ENSOARG00000015236,ENSOARG00000016622,ENSOARG00000019067,ENSOARG00000009999,ENSOARG00000009599,ENSOARG00000006007,ENSOARG00000007134,ENSOARG00000017093,ENSOARG00000015592,ENSOARG00000001060,ENSOARG00000006421,ENSOARG00000004787,ENSOARG00000000405,ENSOARG00000005007,ENSOARG00000016505,ENSOARG00000016922,ENSOARG00000016334,ENSOARG00000018528,ENSOARG00000004797,ENSOARG00000006813,ENSOARG00000014623,…	15	ENSOARG00000017769,ENSOARG00000005781,ENSOARG00000006378,ENSOARG00000016764,ENSOARG00000012490,ENSOARG00000006034,ENSOARG00000012314,ENSOARG00000021001,ENSOARG00000013752,ENSOARG00000015118,ENSOARG00000019145,ENSOARG00000013151,ENSOARG00000002366,ENSOARG00000016363,ENSOARG00000017964
GO:0030155	regulation of cell adhesion	biological_process	2.748e-12	6.5091e-10	50	677	452	19130	47	ENSOARG00000013573,ENSOARG00000020968,ENSOARG00000010448,ENSOARG00000017875,ENSOARG00000002699,ENSOARG00000008349,ENSOARG00000013918,ENSOARG00000008091,ENSOARG00000016133,ENSOARG00000015718,ENSOARG00000018039,ENSOARG00000020112,ENSOARG00000007229,ENSOARG00000006813,ENSOARG00000017420,ENSOARG00000013317,ENSOARG00000006301,ENSOARG00000007932,ENSOARG00000000058,ENSOARG00000015037,ENSOARG00000001158,…	3	ENSOARG00000004871,ENSOARG00000020519,ENSOARG00000011865
GO:0022603	regulation of anatomical structure morphogenesis	biological_process	5.7168e-07	5.0696e-05	50	677	640	19130	40	ENSOARG00000006813,ENSOARG00000012180,ENSOARG00000008249,ENSOARG00000014582,ENSOARG00000019463,ENSOARG00000006760,ENSOARG00000017465,ENSOARG00000005579,ENSOARG00000020761,ENSOARG00000017807,ENSOARG00000017562,ENSOARG00000006614,ENSOARG00000002699,ENSOARG00000008349,ENSOARG00000015180,ENSOARG00000020622,ENSOARG00000018039,ENSOARG00000015286,ENSOARG00000020889,ENSOARG00000019503,ENSOARG00000015379,…	10	ENSOARG00000011464,ENSOARG00000004871,ENSOARG00000016342,ENSOARG00000000322,ENSOARG00000006034,ENSOARG00000021001,ENSOARG00000013752,ENSOARG00000015118,ENSOARG00000002366,ENSOARG00000006212
GO:0031401	positive regulation of protein modification process	biological_process	5.2969e-06	0.00036816	50	677	698	19130	40	ENSOARG00000021097,ENSOARG00000014463,ENSOARG00000006760,ENSOARG00000006301,ENSOARG00000020050,ENSOARG00000016937,ENSOARG00000010664,ENSOARG00000020761,ENSOARG00000008285,ENSOARG00000006353,ENSOARG00000012180,ENSOARG00000018510,ENSOARG00000006813,ENSOARG00000007229,ENSOARG00000016133,ENSOARG00000006538,ENSOARG00000005792,ENSOARG00000019503,ENSOARG00000018039,ENSOARG00000015718,ENSOARG00000020968,…	10	ENSOARG00000002260,ENSOARG00000011019,ENSOARG00000021001,ENSOARG00000011865,ENSOARG00000006526,ENSOARG00000011352,ENSOARG00000008521,ENSOARG00000006378,ENSOARG00000020287,ENSOARG00000001504
GO:0008284	positive regulation of cell proliferation	biological_process	1.0485e-09	1.4519e-07	49	677	539	19130	38	ENSOARG00000006353,ENSOARG00000007229,ENSOARG00000013317,ENSOARG00000017420,ENSOARG00000020050,ENSOARG00000017562,ENSOARG00000007932,ENSOARG00000004499,ENSOARG00000019663,ENSOARG00000006614,ENSOARG00000016133,ENSOARG00000013918,ENSOARG00000015180,ENSOARG00000006538,ENSOARG00000020112,ENSOARG00000005792,ENSOARG00000015718,ENSOARG00000004015,ENSOARG00000012064,ENSOARG00000014774,ENSOARG00000008984,…	11	ENSOARG00000012178,ENSOARG00000006034,ENSOARG00000011865,ENSOARG00000006378,ENSOARG00000008554,ENSOARG00000008534,ENSOARG00000013151,ENSOARG00000011019,ENSOARG00000013752,ENSOARG00000013010,ENSOARG00000021001
GO:0080134	regulation of response to stress	biological_process	0.00094992	0.027537	49	677	835	19130	39	ENSOARG00000012461,ENSOARG00000017265,ENSOARG00000005117,ENSOARG00000014085,ENSOARG00000000950,ENSOARG00000020861,ENSOARG00000008526,ENSOARG00000000123,ENSOARG00000008715,ENSOARG00000008473,ENSOARG00000008908,ENSOARG00000004983,ENSOARG00000020030,ENSOARG00000010939,ENSOARG00000012362,ENSOARG00000012344,ENSOARG00000008332,ENSOARG00000009682,ENSOARG00000015177,ENSOARG00000006068,ENSOARG00000015044,…	10	ENSOARG00000002260,ENSOARG00000011128,ENSOARG00000021001,ENSOARG00000016285,ENSOARG00000000417,ENSOARG00000014824,ENSOARG00000000450,ENSOARG00000020519,ENSOARG00000001504,Novel02176
GO:1901700	response to oxygen-containing compound	biological_process	2.7409e-05	0.0014997	47	677	681	19130	33	ENSOARG00000019840,ENSOARG00000008507,ENSOARG00000010939,ENSOARG00000003844,ENSOARG00000012461,ENSOARG00000015044,ENSOARG00000001980,ENSOARG00000002790,ENSOARG00000017631,ENSOARG00000009401,ENSOARG00000017892,ENSOARG00000017214,ENSOARG00000004787,ENSOARG00000001783,ENSOARG00000016193,ENSOARG00000014103,ENSOARG00000014188,ENSOARG00000014214,ENSOARG00000018510,ENSOARG00000012274,ENSOARG00000007525,…	14	ENSOARG00000004871,ENSOARG00000017769,ENSOARG00000001504,ENSOARG00000018548,ENSOARG00000016285,ENSOARG00000002386,ENSOARG00000006526,ENSOARG00000011128,ENSOARG00000021060,ENSOARG00000011565,ENSOARG00000002366,ENSOARG00000017474,ENSOARG00000016766,ENSOARG00000008554
GO:0018193	peptidyl-amino acid modification	biological_process	0.00016233	0.0065228	47	677	721	19130	40	ENSOARG00000020968,ENSOARG00000010448,ENSOARG00000020475,ENSOARG00000006553,ENSOARG00000019503,ENSOARG00000018039,ENSOARG00000002053,ENSOARG00000015718,ENSOARG00000013918,ENSOARG00000006538,ENSOARG00000007525,ENSOARG00000006353,ENSOARG00000012180,ENSOARG00000018510,ENSOARG00000005746,ENSOARG00000007229,ENSOARG00000006813,ENSOARG00000006301,ENSOARG00000020050,ENSOARG00000016937,ENSOARG00000017631,…	7	ENSOARG00000000450,ENSOARG00000021001,ENSOARG00000011352,ENSOARG00000000417,ENSOARG00000011865,ENSOARG00000014425,ENSOARG00000011019
GO:0051707	response to other organism	biological_process	6.4042e-09	7.7375e-07	46	677	531	19130	41	ENSOARG00000002820,ENSOARG00000015044,ENSOARG00000001980,ENSOARG00000020667,ENSOARG00000009401,ENSOARG00000009130,ENSOARG00000025182,ENSOARG00000008232,ENSOARG00000015177,ENSOARG00000020734,ENSOARG00000014103,ENSOARG00000016193,ENSOARG00000019840,Novel02027,ENSOARG00000006139,ENSOARG00000003908,ENSOARG00000017265,ENSOARG00000009686,ENSOARG00000008908,Novel00341,ENSOARG00000008715,ENSOARG000000105…	5	ENSOARG00000021001,ENSOARG00000017769,Novel01381,ENSOARG00000016285,ENSOARG00000011352
GO:0043207	response to external biotic stimulus	biological_process	6.6131e-09	7.9365e-07	46	677	532	19130	41	ENSOARG00000020112,ENSOARG00000005792,ENSOARG00000015718,ENSOARG00000021000,ENSOARG00000008340,ENSOARG00000008057,ENSOARG00000010521,ENSOARG00000009800,ENSOARG00000007944,ENSOARG00000017205,ENSOARG00000020761,ENSOARG00000003782,ENSOARG00000016937,ENSOARG00000025180,ENSOARG00000006301,ENSOARG00000007525,ENSOARG00000012274,ENSOARG00000000276,ENSOARG00000018510,ENSOARG00000014214,ENSOARG00000025182,…	5	ENSOARG00000011352,ENSOARG00000016285,Novel01381,ENSOARG00000017769,ENSOARG00000021001
GO:0009607	response to biotic stimulus	biological_process	4.1591e-08	4.4567e-06	46	677	569	19130	41	ENSOARG00000017265,ENSOARG00000009686,ENSOARG00000008715,Novel00341,ENSOARG00000008908,Novel02027,ENSOARG00000019840,ENSOARG00000006139,ENSOARG00000003908,ENSOARG00000009130,ENSOARG00000025182,ENSOARG00000008232,ENSOARG00000014103,ENSOARG00000016193,ENSOARG00000015177,ENSOARG00000020734,ENSOARG00000002820,ENSOARG00000015044,ENSOARG00000001980,ENSOARG00000009401,ENSOARG00000020667,ENSOARG000000037…	5	Novel01381,ENSOARG00000021001,ENSOARG00000017769,ENSOARG00000011352,ENSOARG00000016285
GO:0032101	regulation of response to external stimulus	biological_process	1.6243e-07	1.5554e-05	46	677	556	19130	36	ENSOARG00000015177,ENSOARG00000006068,ENSOARG00000009682,ENSOARG00000004787,ENSOARG00000001060,ENSOARG00000020667,ENSOARG00000009401,ENSOARG00000015044,ENSOARG00000008473,ENSOARG00000008908,ENSOARG00000008715,ENSOARG00000008526,ENSOARG00000000123,ENSOARG00000020861,ENSOARG00000000950,ENSOARG00000011146,ENSOARG00000005117,ENSOARG00000010462,ENSOARG00000017265,ENSOARG00000012362,ENSOARG00000012064,…	10	ENSOARG00000021001,ENSOARG00000013151,Novel02176,ENSOARG00000001504,ENSOARG00000020519,ENSOARG00000000450,ENSOARG00000016285,ENSOARG00000014723,ENSOARG00000014824,ENSOARG00000000417
GO:0042327	positive regulation of phosphorylation	biological_process	1.0538e-06	8.7831e-05	46	677	585	19130	37	ENSOARG00000020968,ENSOARG00000010448,ENSOARG00000008057,ENSOARG00000019503,ENSOARG00000005792,ENSOARG00000015718,ENSOARG00000018039,ENSOARG00000016133,ENSOARG00000006538,ENSOARG00000012180,ENSOARG00000006353,ENSOARG00000007229,ENSOARG00000006813,ENSOARG00000018510,ENSOARG00000020761,ENSOARG00000010664,ENSOARG00000014463,ENSOARG00000021097,ENSOARG00000016937,ENSOARG00000006301,ENSOARG00000020050,…	9	ENSOARG00000008521,ENSOARG00000011865,ENSOARG00000006526,ENSOARG00000011352,ENSOARG00000006378,ENSOARG00000020287,ENSOARG00000011019,ENSOARG00000002260,ENSOARG00000021001
GO:0045944	positive regulation of transcription from RNA polymerase II promoter	biological_process	0.0010314	0.029564	46	677	777	19130	33	ENSOARG00000017265,ENSOARG00000014822,ENSOARG00000012131,ENSOARG00000019067,ENSOARG00000010939,ENSOARG00000008705,ENSOARG00000004797,ENSOARG00000016334,ENSOARG00000001783,ENSOARG00000009172,ENSOARG00000012360,ENSOARG00000015727,ENSOARG00000020050,ENSOARG00000004499,ENSOARG00000012094,ENSOARG00000017562,ENSOARG00000007763,ENSOARG00000014623,ENSOARG00000006353,ENSOARG00000017420,ENSOARG00000007984,…	13	ENSOARG00000013752,ENSOARG00000012314,ENSOARG00000005434,ENSOARG00000019817,ENSOARG00000016363,ENSOARG00000009675,ENSOARG00000002366,ENSOARG00000006378,ENSOARG00000016342,ENSOARG00000001504,ENSOARG00000006034,ENSOARG00000012667,ENSOARG00000004414
GO:0001934	positive regulation of protein phosphorylation	biological_process	6.4972e-07	5.7055e-05	45	677	558	19130	36	ENSOARG00000001094,ENSOARG00000001060,ENSOARG00000015592,ENSOARG00000001158,ENSOARG00000008332,ENSOARG00000009682,ENSOARG00000016193,ENSOARG00000008480,ENSOARG00000012344,ENSOARG00000006358,ENSOARG00000016017,ENSOARG00000003844,ENSOARG00000008984,ENSOARG00000014762,ENSOARG00000003798,ENSOARG00000020968,ENSOARG00000010448,ENSOARG00000008057,ENSOARG00000019503,ENSOARG00000005792,ENSOARG00000015718,…	9	ENSOARG00000021001,ENSOARG00000011019,ENSOARG00000002260,ENSOARG00000020287,ENSOARG00000006378,ENSOARG00000008521,ENSOARG00000011352,ENSOARG00000011865,ENSOARG00000006526
GO:0002521	leukocyte differentiation	biological_process	4.0997e-13	1.1715e-10	44	677	351	19130	40	ENSOARG00000008091,ENSOARG00000016133,ENSOARG00000008340,ENSOARG00000008208,ENSOARG00000015718,ENSOARG00000006553,ENSOARG00000009000,ENSOARG00000009800,ENSOARG00000004628,ENSOARG00000020968,ENSOARG00000020050,ENSOARG00000006301,ENSOARG00000021177,ENSOARG00000003782,ENSOARG00000005579,ENSOARG00000000058,ENSOARG00000007229,ENSOARG00000017420,ENSOARG00000007525,ENSOARG00000019324,ENSOARG00000011239,…	4	ENSOARG00000011019,ENSOARG00000004414,ENSOARG00000011865,ENSOARG00000014425
GO:0051270	regulation of cellular component movement	biological_process	6.1923e-07	5.4644e-05	44	677	536	19130	36	ENSOARG00000021147,ENSOARG00000004787,ENSOARG00000015044,ENSOARG00000002144,ENSOARG00000015592,ENSOARG00000013157,ENSOARG00000001060,ENSOARG00000009401,ENSOARG00000008908,ENSOARG00000008473,ENSOARG00000011146,ENSOARG00000003604,ENSOARG00000002263,ENSOARG00000020437,ENSOARG00000006358,ENSOARG00000006538,ENSOARG00000008349,ENSOARG00000002699,ENSOARG00000016133,ENSOARG00000016047,ENSOARG00000012064,…	8	ENSOARG00000014723,ENSOARG00000006526,ENSOARG00000004871,ENSOARG00000013151,ENSOARG00000017474,ENSOARG00000021001,ENSOARG00000004312,ENSOARG00000013752
GO:0000904	cell morphogenesis involved in differentiation	biological_process	9.9214e-07	8.3072e-05	44	677	527	19130	35	ENSOARG00000018226,ENSOARG00000006007,ENSOARG00000020138,ENSOARG00000010939,ENSOARG00000019067,ENSOARG00000006358,ENSOARG00000004812,ENSOARG00000004787,ENSOARG00000006421,ENSOARG00000004797,ENSOARG00000005007,ENSOARG00000002144,ENSOARG00000010543,ENSOARG00000002790,ENSOARG00000016867,ENSOARG00000007763,ENSOARG00000016642,ENSOARG00000020761,ENSOARG00000005579,ENSOARG00000004499,ENSOARG00000017560,…	9	ENSOARG00000013752,ENSOARG00000015118,ENSOARG00000006212,ENSOARG00000003149,ENSOARG00000004871,ENSOARG00000001487,ENSOARG00000006034,ENSOARG00000011865,ENSOARG00000014425
GO:0007167	enzyme linked receptor protein signaling pathway	biological_process	3.9853e-06	0.00028583	44	677	564	19130	34	ENSOARG00000004499,ENSOARG00000003130,ENSOARG00000012784,ENSOARG00000008249,ENSOARG00000007525,ENSOARG00000018510,ENSOARG00000006813,ENSOARG00000014188,ENSOARG00000008285,ENSOARG00000012180,ENSOARG00000012064,ENSOARG00000018039,ENSOARG00000002053,ENSOARG00000016047,ENSOARG00000002223,ENSOARG00000020889,ENSOARG00000006538,ENSOARG00000015180,ENSOARG00000010448,ENSOARG00000006007,ENSOARG00000017093,…	10	ENSOARG00000021001,ENSOARG00000013752,ENSOARG00000001504,ENSOARG00000017769,ENSOARG00000006378,ENSOARG00000020287,ENSOARG00000016285,ENSOARG00000006526,ENSOARG00000011865,ENSOARG00000011352
GO:0002694	regulation of leukocyte activation	biological_process	3.6519e-15	1.3417e-12	43	677	301	19130	40	ENSOARG00000010199,ENSOARG00000008908,ENSOARG00000014822,ENSOARG00000003604,ENSOARG00000016138,ENSOARG00000008984,ENSOARG00000016017,ENSOARG00000010939,ENSOARG00000012131,ENSOARG00000013646,ENSOARG00000011239,ENSOARG00000011437,ENSOARG00000016193,ENSOARG00000013509,ENSOARG00000011944,ENSOARG00000018775,ENSOARG00000001158,ENSOARG00000007252,ENSOARG00000005236,ENSOARG00000006301,ENSOARG00000007932,…	3	ENSOARG00000014425,ENSOARG00000011865,ENSOARG00000011019
GO:0050865	regulation of cell activation	biological_process	5.6751e-14	1.7923e-11	43	677	324	19130	40	ENSOARG00000016193,ENSOARG00000011944,ENSOARG00000013509,ENSOARG00000011437,ENSOARG00000011239,ENSOARG00000005236,ENSOARG00000007252,ENSOARG00000001158,ENSOARG00000018775,ENSOARG00000014822,ENSOARG00000008908,ENSOARG00000010199,ENSOARG00000013646,ENSOARG00000012131,ENSOARG00000010939,ENSOARG00000016017,ENSOARG00000008984,ENSOARG00000016138,ENSOARG00000003604,ENSOARG00000020112,ENSOARG00000005792,…	3	ENSOARG00000011019,ENSOARG00000011865,ENSOARG00000014425
GO:0051093	negative regulation of developmental process	biological_process	1.4689e-05	0.00086414	43	677	597	19130	32	ENSOARG00000005579,ENSOARG00000017562,ENSOARG00000006760,ENSOARG00000014463,ENSOARG00000017465,ENSOARG00000008249,ENSOARG00000017420,ENSOARG00000014582,ENSOARG00000019324,ENSOARG00000007229,ENSOARG00000014188,ENSOARG00000002053,ENSOARG00000018039,ENSOARG00000015286,ENSOARG00000000158,ENSOARG00000007690,ENSOARG00000014123,ENSOARG00000008349,ENSOARG00000006614,ENSOARG00000019663,ENSOARG00000006007,…	11	ENSOARG00000017964,ENSOARG00000004250,ENSOARG00000013752,ENSOARG00000015118,ENSOARG00000011865,ENSOARG00000006034,ENSOARG00000014723,ENSOARG00000016285,ENSOARG00000016764,ENSOARG00000001487,ENSOARG00000017769
GO:0044092	negative regulation of molecular function	biological_process	0.00040108	0.013912	43	677	707	19130	38	ENSOARG00000013157,ENSOARG00000001980,ENSOARG00000004797,ENSOARG00000008332,ENSOARG00000015177,ENSOARG00000017214,ENSOARG00000012344,ENSOARG00000005846,ENSOARG00000004787,ENSOARG00000016622,ENSOARG00000019670,ENSOARG00000003963,ENSOARG00000006737,ENSOARG00000020030,ENSOARG00000000950,ENSOARG00000017093,ENSOARG00000021090,ENSOARG00000009999,ENSOARG00000019663,ENSOARG00000008189,ENSOARG00000018210,…	5	ENSOARG00000002260,ENSOARG00000016285,ENSOARG00000007493,ENSOARG00000013752,ENSOARG00000020519
GO:0002252	immune effector process	biological_process	9.711e-09	1.1135e-06	42	677	452	19130	39	ENSOARG00000025182,ENSOARG00000004208,ENSOARG00000015177,ENSOARG00000020734,ENSOARG00000011239,ENSOARG00000009130,ENSOARG00000009401,ENSOARG00000005167,ENSOARG00000020667,ENSOARG00000021005,ENSOARG00000015044,ENSOARG00000000950,ENSOARG00000008715,ENSOARG00000008908,ENSOARG00000017265,ENSOARG00000014085,ENSOARG00000003028,ENSOARG00000010939,ENSOARG00000006139,ENSOARG00000008001,ENSOARG00000003908,…	3	ENSOARG00000011019,ENSOARG00000016285,ENSOARG00000021001
GO:0050776	regulation of immune response	biological_process	3.7074e-10	5.5617e-08	41	677	379	19130	40	ENSOARG00000008984,ENSOARG00000004983,ENSOARG00000015215,ENSOARG00000010939,ENSOARG00000013646,ENSOARG00000008001,ENSOARG00000011171,ENSOARG00000017265,ENSOARG00000014085,ENSOARG00000000950,ENSOARG00000008526,ENSOARG00000015044,ENSOARG00000018775,ENSOARG00000020667,ENSOARG00000017631,ENSOARG00000021005,ENSOARG00000011842,ENSOARG00000011239,ENSOARG00000008480,ENSOARG00000003254,ENSOARG00000007229,…	1	ENSOARG00000011019
GO:0001816	cytokine production	biological_process	1.1769e-08	1.3325e-06	41	677	429	19130	41	ENSOARG00000010939,ENSOARG00000006358,ENSOARG00000008984,ENSOARG00000010080,ENSOARG00000019840,ENSOARG00000005322,ENSOARG00000020249,ENSOARG00000014762,ENSOARG00000000123,ENSOARG00000008908,ENSOARG00000011171,ENSOARG00000017265,ENSOARG00000009401,ENSOARG00000011738,ENSOARG00000012515,ENSOARG00000005236,ENSOARG00000021005,ENSOARG00000015044,ENSOARG00000015727,ENSOARG00000001980,ENSOARG00000013509,…	0
GO:0040012	regulation of locomotion	biological_process	7.0569e-06	0.00045698	41	677	530	19130	35	ENSOARG00000017560,ENSOARG00000012180,ENSOARG00000018510,ENSOARG00000006813,ENSOARG00000007229,ENSOARG00000017562,ENSOARG00000007932,ENSOARG00000005579,ENSOARG00000017465,ENSOARG00000012145,ENSOARG00000016937,ENSOARG00000006614,ENSOARG00000014236,ENSOARG00000015286,ENSOARG00000012064,ENSOARG00000016133,ENSOARG00000002699,ENSOARG00000008349,ENSOARG00000006538,ENSOARG00000006358,ENSOARG00000020437,…	6	ENSOARG00000021001,ENSOARG00000004871,ENSOARG00000013752,ENSOARG00000013151,ENSOARG00000014723,ENSOARG00000006526
GO:0043069	negative regulation of programmed cell death	biological_process	3.5166e-05	0.0018729	41	677	573	19130	34	ENSOARG00000020138,ENSOARG00000003604,ENSOARG00000010939,ENSOARG00000006358,ENSOARG00000009999,ENSOARG00000010199,ENSOARG00000000123,ENSOARG00000015592,ENSOARG00000018189,ENSOARG00000019197,ENSOARG00000001060,ENSOARG00000017214,ENSOARG00000016334,ENSOARG00000008332,ENSOARG00000016922,ENSOARG00000018510,ENSOARG00000007229,ENSOARG00000007984,ENSOARG00000007525,ENSOARG00000017420,ENSOARG00000001202,…	7	ENSOARG00000013151,ENSOARG00000011019,ENSOARG00000014425,ENSOARG00000017769,ENSOARG00000015118,ENSOARG00000007493,ENSOARG00000013752
GO:0060548	negative regulation of cell death	biological_process	0.00010969	0.0047467	41	677	604	19130	34	ENSOARG00000019197,ENSOARG00000001060,ENSOARG00000015592,ENSOARG00000018189,ENSOARG00000008332,ENSOARG00000016334,ENSOARG00000016922,ENSOARG00000017214,ENSOARG00000006358,ENSOARG00000010939,ENSOARG00000020138,ENSOARG00000003604,ENSOARG00000000123,ENSOARG00000009999,ENSOARG00000010199,ENSOARG00000007234,ENSOARG00000010448,ENSOARG00000009800,ENSOARG00000012299,ENSOARG00000014774,ENSOARG00000018039,…	7	ENSOARG00000013151,ENSOARG00000011019,ENSOARG00000014425,ENSOARG00000017769,ENSOARG00000013752,ENSOARG00000007493,ENSOARG00000015118
GO:0040007	growth	biological_process	0.00068988	0.021524	41	677	651	19130	29	ENSOARG00000016790,ENSOARG00000006614,ENSOARG00000019663,ENSOARG00000001094,ENSOARG00000002790,ENSOARG00000013669,ENSOARG00000015044,ENSOARG00000018039,ENSOARG00000014774,ENSOARG00000019503,ENSOARG00000015286,ENSOARG00000004797,ENSOARG00000011239,ENSOARG00000004787,ENSOARG00000014123,ENSOARG00000005846,ENSOARG00000020233,ENSOARG00000017420,ENSOARG00000019067,ENSOARG00000010473,ENSOARG00000004403,…	12	ENSOARG00000015118,ENSOARG00000013752,ENSOARG00000012314,ENSOARG00000021001,ENSOARG00000006212,ENSOARG00000013151,ENSOARG00000011019,ENSOARG00000006378,ENSOARG00000011464,ENSOARG00000011865,ENSOARG00000016285,ENSOARG00000016764
GO:0051249	regulation of lymphocyte activation	biological_process	2.3249e-15	8.7194e-13	40	677	259	19130	37	ENSOARG00000016017,ENSOARG00000013646,ENSOARG00000012131,ENSOARG00000003604,ENSOARG00000016138,ENSOARG00000008984,ENSOARG00000008908,ENSOARG00000014822,ENSOARG00000010199,ENSOARG00000007252,ENSOARG00000005236,ENSOARG00000018775,ENSOARG00000001158,ENSOARG00000011944,ENSOARG00000016193,ENSOARG00000013509,ENSOARG00000011239,ENSOARG00000011437,ENSOARG00000017420,ENSOARG00000019324,ENSOARG00000007525,…	3	ENSOARG00000011865,ENSOARG00000014425,ENSOARG00000011019
GO:0043066	negative regulation of apoptotic process	biological_process	4.6733e-05	0.0024106	40	677	561	19130	33	ENSOARG00000017214,ENSOARG00000016334,ENSOARG00000008332,ENSOARG00000018189,ENSOARG00000015592,ENSOARG00000001060,ENSOARG00000019197,ENSOARG00000010199,ENSOARG00000009999,ENSOARG00000000123,ENSOARG00000003604,ENSOARG00000020138,ENSOARG00000010939,ENSOARG00000006358,ENSOARG00000002699,ENSOARG00000013173,ENSOARG00000016133,ENSOARG00000015167,ENSOARG00000014774,ENSOARG00000018039,ENSOARG00000012299,…	7	ENSOARG00000014425,ENSOARG00000013151,ENSOARG00000011019,ENSOARG00000013752,ENSOARG00000007493,ENSOARG00000015118,ENSOARG00000017769
GO:0045597	positive regulation of cell differentiation	biological_process	6.0682e-05	0.0029766	40	677	563	19130	31	ENSOARG00000017420,ENSOARG00000016017,ENSOARG00000013646,ENSOARG00000007525,ENSOARG00000019067,ENSOARG00000019324,ENSOARG00000007229,ENSOARG00000020138,ENSOARG00000014822,ENSOARG00000010199,ENSOARG00000019463,ENSOARG00000020050,ENSOARG00000006614,ENSOARG00000020968,ENSOARG00000015592,ENSOARG00000010543,ENSOARG00000015718,ENSOARG00000016922,ENSOARG00000014103,ENSOARG00000018039,ENSOARG00000014774,…	9	ENSOARG00000011019,ENSOARG00000017964,ENSOARG00000006212,ENSOARG00000015118,ENSOARG00000004414,ENSOARG00000016764,ENSOARG00000004871,ENSOARG00000011464,ENSOARG00000006378
GO:2000145	regulation of cell motility	biological_process	3.1126e-06	0.00022964	39	677	478	19130	33	ENSOARG00000012180,ENSOARG00000006813,ENSOARG00000007229,ENSOARG00000017560,ENSOARG00000017465,ENSOARG00000012145,ENSOARG00000016937,ENSOARG00000017562,ENSOARG00000005579,ENSOARG00000007932,ENSOARG00000006614,ENSOARG00000016133,ENSOARG00000006538,ENSOARG00000008349,ENSOARG00000002699,ENSOARG00000015286,ENSOARG00000014236,ENSOARG00000012064,ENSOARG00000020437,ENSOARG00000003604,ENSOARG00000002263,…	6	ENSOARG00000006526,ENSOARG00000014723,ENSOARG00000013151,ENSOARG00000013752,ENSOARG00000004871,ENSOARG00000021001
GO:0023014	signal transduction by protein phosphorylation	biological_process	1.0391e-05	0.00064505	39	677	498	19130	33	ENSOARG00000008480,ENSOARG00000016193,ENSOARG00000008332,ENSOARG00000011437,ENSOARG00000001060,ENSOARG00000001094,ENSOARG00000015592,ENSOARG00000003798,ENSOARG00000017093,ENSOARG00000016017,ENSOARG00000003844,ENSOARG00000006358,ENSOARG00000020030,ENSOARG00000003963,ENSOARG00000001254,ENSOARG00000015718,ENSOARG00000018039,ENSOARG00000005792,ENSOARG00000008057,ENSOARG00000010493,ENSOARG00000010448,…	6	ENSOARG00000011128,ENSOARG00000020287,ENSOARG00000008521,ENSOARG00000011865,ENSOARG00000002260,ENSOARG00000011352
GO:0051050	positive regulation of transport	biological_process	0.00012035	0.0051312	39	677	574	19130	32	ENSOARG00000008057,ENSOARG00000009800,ENSOARG00000005792,ENSOARG00000020889,ENSOARG00000016133,ENSOARG00000015180,ENSOARG00000002699,ENSOARG00000007525,ENSOARG00000017420,ENSOARG00000007395,ENSOARG00000018510,ENSOARG00000017562,ENSOARG00000003782,ENSOARG00000001202,ENSOARG00000025180,ENSOARG00000020050,ENSOARG00000016937,ENSOARG00000020667,ENSOARG00000009401,ENSOARG00000017892,ENSOARG00000015044,…	7	ENSOARG00000005434,ENSOARG00000000450,ENSOARG00000000322,ENSOARG00000000417,ENSOARG00000017474,ENSOARG00000006526,ENSOARG00000014425
GO:0000165	MAPK cascade	biological_process	7.4906e-06	0.00047988	38	677	475	19130	32	ENSOARG00000010664,ENSOARG00000020761,ENSOARG00000009653,ENSOARG00000021097,ENSOARG00000014463,ENSOARG00000006760,ENSOARG00000016937,ENSOARG00000004484,ENSOARG00000006353,ENSOARG00000012180,ENSOARG00000014214,ENSOARG00000007229,ENSOARG00000005792,ENSOARG00000018039,ENSOARG00000015718,ENSOARG00000001254,ENSOARG00000010493,ENSOARG00000008057,ENSOARG00000017093,ENSOARG00000003798,ENSOARG00000006358,…	6	ENSOARG00000011128,ENSOARG00000020287,ENSOARG00000008521,ENSOARG00000011352,ENSOARG00000002260,ENSOARG00000011865
GO:0048729	tissue morphogenesis	biological_process	0.00013376	0.0056201	38	677	543	19130	28	ENSOARG00000019663,ENSOARG00000001060,ENSOARG00000006614,ENSOARG00000018528,ENSOARG00000015286,ENSOARG00000006553,ENSOARG00000015379,ENSOARG00000016042,ENSOARG00000014774,ENSOARG00000018039,ENSOARG00000016922,ENSOARG00000014361,ENSOARG00000008349,ENSOARG00000006421,ENSOARG00000004787,ENSOARG00000013317,ENSOARG00000019067,ENSOARG00000010939,ENSOARG00000017420,ENSOARG00000020233,ENSOARG00000016622,…	10	ENSOARG00000005781,ENSOARG00000016764,ENSOARG00000006034,ENSOARG00000021001,ENSOARG00000013752,ENSOARG00000004312,ENSOARG00000002366,ENSOARG00000013151,ENSOARG00000011056,ENSOARG00000017964
GO:0050778	positive regulation of immune response	biological_process	5.5692e-11	1.023e-08	37	677	299	19130	36	ENSOARG00000007229,ENSOARG00000003254,ENSOARG00000015037,ENSOARG00000009301,ENSOARG00000000058,ENSOARG00000002039,ENSOARG00000003782,ENSOARG00000008057,ENSOARG00000020968,ENSOARG00000009800,ENSOARG00000010521,ENSOARG00000015718,ENSOARG00000021000,ENSOARG00000008208,ENSOARG00000016042,ENSOARG00000020112,ENSOARG00000005792,ENSOARG00000016133,ENSOARG00000008340,ENSOARG00000010939,ENSOARG00000013646,…	1	ENSOARG00000011019
GO:0051345	positive regulation of hydrolase activity	biological_process	5.1669e-06	0.00036192	37	677	439	19130	33	ENSOARG00000011933,ENSOARG00000020741,ENSOARG00000016133,ENSOARG00000013173,ENSOARG00000019218,ENSOARG00000006538,ENSOARG00000014582,ENSOARG00000012180,ENSOARG00000004484,ENSOARG00000008285,ENSOARG00000018510,ENSOARG00000005443,ENSOARG00000016937,ENSOARG00000006760,ENSOARG00000017892,ENSOARG00000011768,ENSOARG00000008161,ENSOARG00000010543,ENSOARG00000005926,ENSOARG00000016922,ENSOARG00000020214,…	4	ENSOARG00000000450,ENSOARG00000000417,ENSOARG00000006526,ENSOARG00000011865
GO:0030029	actin filament-based process	biological_process	5.9439e-06	0.00040163	37	677	452	19130	33	ENSOARG00000008349,ENSOARG00000016133,ENSOARG00000020622,ENSOARG00000016857,ENSOARG00000014042,ENSOARG00000006760,ENSOARG00000005365,ENSOARG00000020050,ENSOARG00000012145,ENSOARG00000007864,ENSOARG00000017465,ENSOARG00000020761,ENSOARG00000007932,ENSOARG00000000276,ENSOARG00000008262,ENSOARG00000019286,ENSOARG00000019971,ENSOARG00000006029,ENSOARG00000004787,ENSOARG00000021147,ENSOARG00000008705,…	4	ENSOARG00000000417,ENSOARG00000017474,ENSOARG00000004312,ENSOARG00000021001
GO:0030334	regulation of cell migration	biological_process	6.6469e-06	0.00043512	37	677	457	19130	32	ENSOARG00000009401,ENSOARG00000013157,ENSOARG00000001060,ENSOARG00000015044,ENSOARG00000015592,ENSOARG00000002144,ENSOARG00000004787,ENSOARG00000021147,ENSOARG00000006358,ENSOARG00000020437,ENSOARG00000003604,ENSOARG00000002263,ENSOARG00000011146,ENSOARG00000008908,ENSOARG00000008473,ENSOARG00000006614,ENSOARG00000015286,ENSOARG00000014236,ENSOARG00000012064,ENSOARG00000016133,ENSOARG00000006538,…	5	ENSOARG00000014723,ENSOARG00000013151,ENSOARG00000013752,ENSOARG00000004871,ENSOARG00000021001
GO:0043549	regulation of kinase activity	biological_process	3.9179e-05	0.0020503	37	677	495	19130	30	ENSOARG00000010448,ENSOARG00000001158,ENSOARG00000007944,ENSOARG00000015592,ENSOARG00000002479,ENSOARG00000008189,ENSOARG00000001254,ENSOARG00000015718,ENSOARG00000018039,ENSOARG00000003206,ENSOARG00000005792,ENSOARG00000004797,ENSOARG00000006538,ENSOARG00000016133,ENSOARG00000002811,ENSOARG00000016017,ENSOARG00000003844,ENSOARG00000006358,ENSOARG00000020030,ENSOARG00000003963,ENSOARG00000018510,…	7	ENSOARG00000011352,ENSOARG00000011865,ENSOARG00000002260,ENSOARG00000016285,ENSOARG00000008521,ENSOARG00000020287,ENSOARG00000011128
GO:0048598	embryonic morphogenesis	biological_process	8.9422e-05	0.0040548	37	677	510	19130	22	ENSOARG00000006813,ENSOARG00000012367,ENSOARG00000011660,ENSOARG00000013317,ENSOARG00000010939,ENSOARG00000019067,ENSOARG00000017420,ENSOARG00000016622,ENSOARG00000017465,ENSOARG00000021177,ENSOARG00000016867,ENSOARG00000009599,ENSOARG00000007134,ENSOARG00000004499,ENSOARG00000006614,ENSOARG00000016271,ENSOARG00000021018,ENSOARG00000017875,ENSOARG00000015379,ENSOARG00000018039,ENSOARG00000016922,…	15	ENSOARG00000013752,ENSOARG00000012314,ENSOARG00000017964,ENSOARG00000002260,ENSOARG00000006212,ENSOARG00000011056,ENSOARG00000009675,ENSOARG00000008534,ENSOARG00000016342,ENSOARG00000020376,ENSOARG00000005781,ENSOARG00000001159,ENSOARG00000006034,ENSOARG00000019395,ENSOARG00000016764
GO:0051338	regulation of transferase activity	biological_process	0.00027442	0.010061	37	677	547	19130	30	ENSOARG00000001158,ENSOARG00000007944,ENSOARG00000015592,ENSOARG00000002479,ENSOARG00000008189,ENSOARG00000010448,ENSOARG00000006538,ENSOARG00000016133,ENSOARG00000001254,ENSOARG00000015718,ENSOARG00000018039,ENSOARG00000003206,ENSOARG00000005792,ENSOARG00000004797,ENSOARG00000020030,ENSOARG00000018510,ENSOARG00000003963,ENSOARG00000012180,ENSOARG00000004484,ENSOARG00000002811,ENSOARG00000016017,…	7	ENSOARG00000002260,ENSOARG00000011865,ENSOARG00000011352,ENSOARG00000008521,ENSOARG00000016285,ENSOARG00000020287,ENSOARG00000011128
GO:0022407	regulation of cell-cell adhesion	biological_process	3.1312e-12	7.1351e-10	36	677	264	19130	35	ENSOARG00000004812,ENSOARG00000011239,ENSOARG00000011944,ENSOARG00000016193,ENSOARG00000013509,ENSOARG00000018775,ENSOARG00000001158,ENSOARG00000007252,ENSOARG00000005236,ENSOARG00000010199,ENSOARG00000014822,ENSOARG00000008908,ENSOARG00000000123,ENSOARG00000016138,ENSOARG00000008984,ENSOARG00000003604,ENSOARG00000010939,ENSOARG00000013646,ENSOARG00000016017,ENSOARG00000008091,ENSOARG00000013918,…	1	ENSOARG00000011865
GO:0009611	response to wounding	biological_process	3.4272e-06	0.00024978	36	677	432	19130	28	ENSOARG00000012360,ENSOARG00000015044,ENSOARG00000009800,ENSOARG00000020667,ENSOARG00000017892,ENSOARG00000009401,ENSOARG00000018445,ENSOARG00000013573,ENSOARG00000008057,ENSOARG00000003319,ENSOARG00000005792,ENSOARG00000002223,ENSOARG00000009682,ENSOARG00000006068,ENSOARG00000008480,ENSOARG00000012362,ENSOARG00000007525,ENSOARG00000016622,ENSOARG00000009999,ENSOARG00000005117,ENSOARG00000016937,…	8	ENSOARG00000014425,ENSOARG00000011865,ENSOARG00000014824,ENSOARG00000000417,Novel02176,ENSOARG00000020519,ENSOARG00000000450,ENSOARG00000013752
GO:0043408	regulation of MAPK cascade	biological_process	4.3566e-06	0.00030877	36	677	428	19130	30	ENSOARG00000018039,ENSOARG00000015718,ENSOARG00000008480,ENSOARG00000001254,ENSOARG00000005792,ENSOARG00000008332,ENSOARG00000011437,ENSOARG00000001060,ENSOARG00000008057,ENSOARG00000001094,ENSOARG00000010493,ENSOARG00000015592,ENSOARG00000020761,ENSOARG00000010664,ENSOARG00000009653,ENSOARG00000003798,ENSOARG00000017093,ENSOARG00000006760,ENSOARG00000016937,ENSOARG00000014463,ENSOARG00000021097,…	6	ENSOARG00000011865,ENSOARG00000002260,ENSOARG00000011352,ENSOARG00000008521,ENSOARG00000020287,ENSOARG00000011128
GO:0001501	skeletal system development	biological_process	1.0913e-06	9.0116e-05	35	677	387	19130	21	ENSOARG00000010080,ENSOARG00000004403,ENSOARG00000008507,ENSOARG00000002307,ENSOARG00000017420,ENSOARG00000007134,ENSOARG00000004499,ENSOARG00000009957,ENSOARG00000016306,ENSOARG00000019663,ENSOARG00000005167,ENSOARG00000012515,ENSOARG00000005711,ENSOARG00000016271,ENSOARG00000013176,ENSOARG00000006538,ENSOARG00000006421,ENSOARG00000021018,ENSOARG00000015379,ENSOARG00000002053,ENSOARG00000018039	14	ENSOARG00000011128,ENSOARG00000013752,ENSOARG00000008534,ENSOARG00000009675,ENSOARG00000011056,ENSOARG00000002260,ENSOARG00000004871,ENSOARG00000002449,ENSOARG00000016342,ENSOARG00000020376,ENSOARG00000006378,ENSOARG00000016764,ENSOARG00000019395,ENSOARG00000006034
GO:0001568	blood vessel development	biological_process	8.19e-06	0.00052098	35	677	421	19130	32	ENSOARG00000014361,ENSOARG00000018039,ENSOARG00000016042,ENSOARG00000006553,ENSOARG00000020889,ENSOARG00000017465,ENSOARG00000021177,ENSOARG00000005579,ENSOARG00000017562,ENSOARG00000017807,ENSOARG00000006813,ENSOARG00000014623,ENSOARG00000012180,ENSOARG00000014582,ENSOARG00000020233,ENSOARG00000017420,ENSOARG00000011660,ENSOARG00000004787,ENSOARG00000000405,ENSOARG00000016193,ENSOARG00000016922,…	3	ENSOARG00000017769,ENSOARG00000004871,ENSOARG00000008534
GO:0001944	vasculature development	biological_process	2.2382e-05	0.0012751	35	677	443	19130	32	ENSOARG00000011660,ENSOARG00000020233,ENSOARG00000017420,ENSOARG00000014582,ENSOARG00000012180,ENSOARG00000014623,ENSOARG00000006813,ENSOARG00000017807,ENSOARG00000017562,ENSOARG00000005579,ENSOARG00000021177,ENSOARG00000017465,ENSOARG00000020889,ENSOARG00000006553,ENSOARG00000016042,ENSOARG00000018039,ENSOARG00000014361,ENSOARG00000019067,ENSOARG00000002263,ENSOARG00000000123,ENSOARG00000009999,…	3	ENSOARG00000008534,ENSOARG00000004871,ENSOARG00000017769
GO:0035295	tube development	biological_process	0.00047091	0.015699	35	677	518	19130	26	ENSOARG00000004787,ENSOARG00000014361,ENSOARG00000008349,ENSOARG00000016922,ENSOARG00000018039,ENSOARG00000005007,ENSOARG00000014774,ENSOARG00000015379,ENSOARG00000006553,ENSOARG00000000158,ENSOARG00000018528,ENSOARG00000004797,ENSOARG00000016334,ENSOARG00000006614,ENSOARG00000001060,ENSOARG00000019663,ENSOARG00000012515,ENSOARG00000021177,ENSOARG00000017093,ENSOARG00000014623,ENSOARG00000016622,…	9	ENSOARG00000013151,ENSOARG00000017964,ENSOARG00000021001,ENSOARG00000012314,ENSOARG00000013752,ENSOARG00000015118,ENSOARG00000004414,ENSOARG00000006034,ENSOARG00000005781
GO:0030098	lymphocyte differentiation	biological_process	3.9924e-12	8.9838e-10	34	677	236	19130	31	ENSOARG00000007229,ENSOARG00000008984,ENSOARG00000017420,ENSOARG00000012131,ENSOARG00000007525,ENSOARG00000013646,ENSOARG00000019324,ENSOARG00000010199,ENSOARG00000003028,ENSOARG00000006301,ENSOARG00000021177,ENSOARG00000011171,ENSOARG00000003782,ENSOARG00000005579,ENSOARG00000014822,ENSOARG00000000058,ENSOARG00000000571,ENSOARG00000009800,ENSOARG00000010543,ENSOARG00000004628,ENSOARG00000020968,…	3	ENSOARG00000011019,ENSOARG00000011865,ENSOARG00000014425
GO:0045785	positive regulation of cell adhesion	biological_process	6.8275e-11	1.1832e-08	34	677	259	19130	33	ENSOARG00000018039,ENSOARG00000015718,ENSOARG00000020112,ENSOARG00000002699,ENSOARG00000017875,ENSOARG00000016133,ENSOARG00000013918,ENSOARG00000020968,ENSOARG00000007932,ENSOARG00000000058,ENSOARG00000006301,ENSOARG00000017420,ENSOARG00000013317,ENSOARG00000007229,ENSOARG00000006813,ENSOARG00000008480,ENSOARG00000016193,ENSOARG00000013509,ENSOARG00000018528,ENSOARG00000011239,ENSOARG00000001060,…	1	ENSOARG00000011865
GO:0006954	inflammatory response	biological_process	7.5662e-10	1.081e-07	34	677	297	19130	31	ENSOARG00000016937,ENSOARG00000008908,ENSOARG00000000123,ENSOARG00000008526,ENSOARG00000014277,ENSOARG00000017562,ENSOARG00000000950,ENSOARG00000014762,ENSOARG00000020861,ENSOARG00000017205,ENSOARG00000014214,ENSOARG00000019840,ENSOARG00000020351,ENSOARG00000012274,ENSOARG00000007525,ENSOARG00000006068,ENSOARG00000016193,ENSOARG00000018943,ENSOARG00000005792,ENSOARG00000007690,ENSOARG00000009682,…	3	ENSOARG00000000450,ENSOARG00000000417,ENSOARG00000014824
GO:0001817	regulation of cytokine production	biological_process	1.117e-06	9.099e-05	34	677	378	19130	34	ENSOARG00000007690,ENSOARG00000005792,ENSOARG00000021000,ENSOARG00000016133,ENSOARG00000013918,ENSOARG00000008057,ENSOARG00000010521,ENSOARG00000009800,ENSOARG00000003782,ENSOARG00000025180,ENSOARG00000016937,ENSOARG00000019324,ENSOARG00000007525,ENSOARG00000020233,ENSOARG00000007229,ENSOARG00000016193,ENSOARG00000013509,ENSOARG00000009401,ENSOARG00000011738,ENSOARG00000021005,ENSOARG00000005236,…	0
GO:0031175	neuron projection development	biological_process	0.00094949	0.027537	34	677	500	19130	26	ENSOARG00000004787,ENSOARG00000006421,ENSOARG00000014361,ENSOARG00000018838,ENSOARG00000018039,ENSOARG00000020889,ENSOARG00000015286,ENSOARG00000019503,ENSOARG00000002790,ENSOARG00000012355,ENSOARG00000006760,ENSOARG00000018226,ENSOARG00000009999,ENSOARG00000004499,ENSOARG00000005579,ENSOARG00000020761,ENSOARG00000001574,ENSOARG00000006007,ENSOARG00000007763,ENSOARG00000020138,ENSOARG00000017420,…	8	ENSOARG00000006212,ENSOARG00000003149,ENSOARG00000015118,ENSOARG00000013752,ENSOARG00000011865,ENSOARG00000006378,ENSOARG00000001487,ENSOARG00000011464
GO:0050900	leukocyte migration	biological_process	5.2897e-15	1.9045e-12	33	677	185	19130	29	ENSOARG00000015044,ENSOARG00000015592,ENSOARG00000010521,ENSOARG00000010543,ENSOARG00000009800,ENSOARG00000009401,ENSOARG00000016133,ENSOARG00000008340,ENSOARG00000004787,ENSOARG00000013173,ENSOARG00000002699,ENSOARG00000009000,ENSOARG00000014236,ENSOARG00000020622,ENSOARG00000012064,ENSOARG00000012180,ENSOARG00000008285,ENSOARG00000006813,ENSOARG00000004983,ENSOARG00000003604,ENSOARG00000007229,…	4	ENSOARG00000000450,ENSOARG00000014723,ENSOARG00000000417,ENSOARG00000013151
GO:0018108	peptidyl-tyrosine phosphorylation	biological_process	1.5393e-10	2.4964e-08	33	677	247	19130	28	ENSOARG00000011171,ENSOARG00000016937,ENSOARG00000006301,ENSOARG00000020050,ENSOARG00000014762,ENSOARG00000012180,ENSOARG00000008984,ENSOARG00000006353,ENSOARG00000006813,ENSOARG00000015215,ENSOARG00000007229,ENSOARG00000013646,ENSOARG00000007525,ENSOARG00000006358,ENSOARG00000012367,ENSOARG00000013918,ENSOARG00000012400,ENSOARG00000006538,ENSOARG00000009682,ENSOARG00000016193,ENSOARG00000015718,…	5	ENSOARG00000011019,ENSOARG00000011352,ENSOARG00000014425,ENSOARG00000011865,ENSOARG00000021001
GO:0018212	peptidyl-tyrosine modification	biological_process	1.8887e-10	3.0089e-08	33	677	249	19130	28	ENSOARG00000009682,ENSOARG00000016193,ENSOARG00000015718,ENSOARG00000002053,ENSOARG00000012400,ENSOARG00000013918,ENSOARG00000006538,ENSOARG00000010448,ENSOARG00000020968,ENSOARG00000001060,ENSOARG00000012355,ENSOARG00000002820,ENSOARG00000015592,ENSOARG00000014762,ENSOARG00000011171,ENSOARG00000016937,ENSOARG00000006301,ENSOARG00000020050,ENSOARG00000013646,ENSOARG00000007525,ENSOARG00000006358,…	5	ENSOARG00000011019,ENSOARG00000011352,ENSOARG00000011865,ENSOARG00000014425,ENSOARG00000021001
GO:0034097	response to cytokine	biological_process	3.8215e-07	3.4921e-05	33	677	338	19130	31	ENSOARG00000014277,ENSOARG00000000123,ENSOARG00000017562,ENSOARG00000017205,ENSOARG00000000058,ENSOARG00000011146,ENSOARG00000020050,ENSOARG00000010462,ENSOARG00000017265,ENSOARG00000016109,ENSOARG00000003908,ENSOARG00000006358,ENSOARG00000007525,ENSOARG00000018510,ENSOARG00000014214,ENSOARG00000003604,ENSOARG00000007229,ENSOARG00000014023,ENSOARG00000006353,ENSOARG00000015177,ENSOARG00000008480,…	2	ENSOARG00000017168,ENSOARG00000017769
GO:0045859	regulation of protein kinase activity	biological_process	0.00014656	0.0060513	33	677	452	19130	27	ENSOARG00000015718,ENSOARG00000001254,ENSOARG00000018039,ENSOARG00000003206,ENSOARG00000004797,ENSOARG00000005792,ENSOARG00000016133,ENSOARG00000010448,ENSOARG00000001158,ENSOARG00000015592,ENSOARG00000008189,ENSOARG00000017093,ENSOARG00000009653,ENSOARG00000003798,ENSOARG00000020761,ENSOARG00000014762,ENSOARG00000006760,ENSOARG00000006301,ENSOARG00000002811,ENSOARG00000003844,ENSOARG00000016017,…	6	ENSOARG00000011865,ENSOARG00000002260,ENSOARG00000011352,ENSOARG00000008521,ENSOARG00000020287,ENSOARG00000011128
GO:1903037	regulation of leukocyte cell-cell adhesion	biological_process	1.1935e-13	3.6415e-11	32	677	192	19130	31	ENSOARG00000000058,ENSOARG00000014822,ENSOARG00000015037,ENSOARG00000007932,ENSOARG00000008908,ENSOARG00000010199,ENSOARG00000006301,ENSOARG00000013646,ENSOARG00000010939,ENSOARG00000017420,ENSOARG00000016017,ENSOARG00000008984,ENSOARG00000016138,ENSOARG00000003604,ENSOARG00000007229,ENSOARG00000020112,ENSOARG00000013509,ENSOARG00000015718,ENSOARG00000016193,ENSOARG00000011944,ENSOARG00000013918,…	1	ENSOARG00000011865
GO:0034110	regulation of homotypic cell-cell adhesion	biological_process	5.8001e-13	1.582e-10	32	677	201	19130	31	ENSOARG00000006301,ENSOARG00000010199,ENSOARG00000014822,ENSOARG00000000058,ENSOARG00000015037,ENSOARG00000008908,ENSOARG00000007932,ENSOARG00000016138,ENSOARG00000008984,ENSOARG00000003604,ENSOARG00000007229,ENSOARG00000010939,ENSOARG00000013646,ENSOARG00000016017,ENSOARG00000017420,ENSOARG00000008091,ENSOARG00000013918,ENSOARG00000016133,ENSOARG00000002699,ENSOARG00000011239,ENSOARG00000020112,…	1	ENSOARG00000011865
GO:0002009	morphogenesis of an epithelium	biological_process	0.00010147	0.0044993	32	677	420	19130	24	ENSOARG00000006007,ENSOARG00000009599,ENSOARG00000007134,ENSOARG00000017093,ENSOARG00000014623,ENSOARG00000006813,ENSOARG00000013317,ENSOARG00000019067,ENSOARG00000017420,ENSOARG00000016622,ENSOARG00000014361,ENSOARG00000008349,ENSOARG00000006421,ENSOARG00000004787,ENSOARG00000018528,ENSOARG00000006553,ENSOARG00000015379,ENSOARG00000015286,ENSOARG00000014774,ENSOARG00000018039,ENSOARG00000016922,…	8	ENSOARG00000006034,ENSOARG00000016764,ENSOARG00000005781,ENSOARG00000017964,ENSOARG00000013151,ENSOARG00000002366,ENSOARG00000013752,ENSOARG00000021001
GO:0007264	small GTPase mediated signal transduction	biological_process	0.00021353	0.0081266	32	677	449	19130	32	ENSOARG00000025194,ENSOARG00000007932,ENSOARG00000017465,ENSOARG00000016937,ENSOARG00000006760,Novel01831,ENSOARG00000019707,ENSOARG00000020622,ENSOARG00000013173,ENSOARG00000019218,Novel01889,ENSOARG00000000571,ENSOARG00000020818,ENSOARG00000020676,ENSOARG00000014288,ENSOARG00000003798,ENSOARG00000017093,ENSOARG00000003028,ENSOARG00000008380,Novel02027,ENSOARG00000010631,ENSOARG00000020437,ENSOA…	0
GO:0050863	regulation of T cell activation	biological_process	2.6477e-13	7.6877e-11	31	677	185	19130	30	ENSOARG00000018775,ENSOARG00000001158,ENSOARG00000007252,ENSOARG00000005236,ENSOARG00000013573,ENSOARG00000020968,ENSOARG00000002699,ENSOARG00000011239,ENSOARG00000016133,ENSOARG00000013918,ENSOARG00000008091,ENSOARG00000015718,ENSOARG00000016193,ENSOARG00000011944,ENSOARG00000013509,ENSOARG00000020112,ENSOARG00000003604,ENSOARG00000007229,ENSOARG00000016138,ENSOARG00000008984,ENSOARG00000017420,…	1	ENSOARG00000011865
GO:0070661	leukocyte proliferation	biological_process	1.078e-12	2.8538e-10	31	677	193	19130	29	ENSOARG00000009250,ENSOARG00000003604,ENSOARG00000007229,ENSOARG00000008984,ENSOARG00000016017,ENSOARG00000019324,ENSOARG00000012367,ENSOARG00000013646,ENSOARG00000012131,ENSOARG00000003028,ENSOARG00000008908,ENSOARG00000007932,ENSOARG00000015037,ENSOARG00000018775,ENSOARG00000009234,ENSOARG00000015592,ENSOARG00000007252,ENSOARG00000005236,ENSOARG00000011239,ENSOARG00000013173,ENSOARG00000016133,…	2	ENSOARG00000011865,ENSOARG00000011019
GO:0007169	transmembrane receptor protein tyrosine kinase signaling pathway	biological_process	5.9569e-06	0.00040163	31	677	341	19130	22	ENSOARG00000003130,ENSOARG00000014762,ENSOARG00000017093,ENSOARG00000006007,ENSOARG00000006358,ENSOARG00000012180,ENSOARG00000010631,ENSOARG00000008285,ENSOARG00000010080,ENSOARG00000014188,ENSOARG00000004403,ENSOARG00000006813,ENSOARG00000018510,ENSOARG00000020889,ENSOARG00000002223,ENSOARG00000002053,ENSOARG00000012064,ENSOARG00000012400,ENSOARG00000006538,ENSOARG00000010448,ENSOARG00000017631,…	9	ENSOARG00000013752,ENSOARG00000021001,ENSOARG00000006378,ENSOARG00000020287,ENSOARG00000001504,ENSOARG00000011865,ENSOARG00000006526,ENSOARG00000011352,ENSOARG00000016285
GO:0030036	actin cytoskeleton organization	biological_process	0.00016048	0.0064631	31	677	412	19130	29	ENSOARG00000009682,ENSOARG00000020622,ENSOARG00000009972,ENSOARG00000008480,ENSOARG00000016133,ENSOARG00000008705,ENSOARG00000016888,ENSOARG00000008349,ENSOARG00000004787,ENSOARG00000003585,ENSOARG00000009401,ENSOARG00000014042,ENSOARG00000020959,ENSOARG00000008908,ENSOARG00000020761,ENSOARG00000008715,ENSOARG00000007932,ENSOARG00000017465,ENSOARG00000007864,ENSOARG00000012145,ENSOARG00000020050,…	2	ENSOARG00000021001,ENSOARG00000000417
GO:0045596	negative regulation of cell differentiation	biological_process	0.00032567	0.011749	31	677	444	19130	20	ENSOARG00000019663,ENSOARG00000007991,ENSOARG00000002144,ENSOARG00000016193,ENSOARG00000002053,ENSOARG00000014103,ENSOARG00000006068,ENSOARG00000018039,ENSOARG00000000158,ENSOARG00000015286,ENSOARG00000004797,ENSOARG00000007690,ENSOARG00000004787,ENSOARG00000014123,ENSOARG00000008349,ENSOARG00000017420,ENSOARG00000019324,ENSOARG00000007229,ENSOARG00000014188,ENSOARG00000006760	11	ENSOARG00000013752,ENSOARG00000015118,ENSOARG00000017964,ENSOARG00000004250,ENSOARG00000001487,ENSOARG00000017769,ENSOARG00000011865,ENSOARG00000006034,ENSOARG00000014723,ENSOARG00000016764,ENSOARG00000016285
GO:0046651	lymphocyte proliferation	biological_process	2.5987e-12	6.3218e-10	30	677	187	19130	28	ENSOARG00000009000,ENSOARG00000020112,ENSOARG00000005792,ENSOARG00000013509,ENSOARG00000015718,ENSOARG00000016193,ENSOARG00000008208,ENSOARG00000013918,ENSOARG00000016133,ENSOARG00000013173,ENSOARG00000011239,ENSOARG00000005236,ENSOARG00000007252,ENSOARG00000009234,ENSOARG00000018775,ENSOARG00000015037,ENSOARG00000007932,ENSOARG00000008908,ENSOARG00000003028,ENSOARG00000013646,ENSOARG00000012131,…	2	ENSOARG00000011865,ENSOARG00000011019
GO:0032943	mononuclear cell proliferation	biological_process	3.036e-12	7.0069e-10	30	677	188	19130	28	ENSOARG00000005792,ENSOARG00000020112,ENSOARG00000009000,ENSOARG00000015718,ENSOARG00000016193,ENSOARG00000008208,ENSOARG00000013509,ENSOARG00000016133,ENSOARG00000013918,ENSOARG00000011239,ENSOARG00000013173,ENSOARG00000007252,ENSOARG00000005236,ENSOARG00000009234,ENSOARG00000018775,ENSOARG00000015037,ENSOARG00000008908,ENSOARG00000007932,ENSOARG00000003028,ENSOARG00000019324,ENSOARG00000012367,…	2	ENSOARG00000011019,ENSOARG00000011865
GO:0097285	cell-type specific apoptotic process	biological_process	9.0683e-07	7.7003e-05	30	677	309	19130	25	ENSOARG00000010448,ENSOARG00000001060,ENSOARG00000009256,ENSOARG00000015592,ENSOARG00000009800,ENSOARG00000018189,ENSOARG00000016334,ENSOARG00000008332,ENSOARG00000018039,ENSOARG00000004015,ENSOARG00000016922,ENSOARG00000017034,ENSOARG00000013173,ENSOARG00000014750,ENSOARG00000007984,ENSOARG00000007525,ENSOARG00000010939,ENSOARG00000014582,ENSOARG00000017420,ENSOARG00000020138,ENSOARG00000018510,…	5	ENSOARG00000017769,ENSOARG00000015118,ENSOARG00000011019,ENSOARG00000013151,ENSOARG00000014425
GO:0033993	response to lipid	biological_process	1.3988e-05	0.00083105	30	677	351	19130	25	ENSOARG00000009401,ENSOARG00000010521,ENSOARG00000002790,ENSOARG00000005075,ENSOARG00000001980,ENSOARG00000020112,ENSOARG00000005792,ENSOARG00000021000,ENSOARG00000016193,ENSOARG00000014103,ENSOARG00000016047,ENSOARG00000018039,ENSOARG00000017214,ENSOARG00000004787,ENSOARG00000010939,ENSOARG00000007525,ENSOARG00000007984,ENSOARG00000008507,ENSOARG00000012274,ENSOARG00000019840,ENSOARG00000018510,…	5	ENSOARG00000017769,ENSOARG00000002366,ENSOARG00000021060,ENSOARG00000016285,ENSOARG00000019817
GO:0048514	blood vessel morphogenesis	biological_process	3.0463e-05	0.001656	30	677	359	19130	28	ENSOARG00000000123,ENSOARG00000005579,ENSOARG00000017562,ENSOARG00000017807,ENSOARG00000010199,ENSOARG00000017465,ENSOARG00000021177,ENSOARG00000016798,ENSOARG00000009999,ENSOARG00000020233,ENSOARG00000014582,ENSOARG00000002263,ENSOARG00000006813,ENSOARG00000014623,ENSOARG00000012180,ENSOARG00000016193,ENSOARG00000016922,ENSOARG00000016334,ENSOARG00000020889,ENSOARG00000006553,ENSOARG00000009827,…	2	ENSOARG00000017769,ENSOARG00000008534
GO:0031347	regulation of defense response	biological_process	3.8336e-05	0.002012	30	677	373	19130	25	ENSOARG00000014085,ENSOARG00000017265,ENSOARG00000020761,ENSOARG00000008908,ENSOARG00000000123,ENSOARG00000008526,ENSOARG00000008715,ENSOARG00000020861,ENSOARG00000000950,ENSOARG00000009301,ENSOARG00000017205,ENSOARG00000004983,ENSOARG00000015177,ENSOARG00000006068,ENSOARG00000021000,ENSOARG00000005792,ENSOARG00000020112,ENSOARG00000009682,ENSOARG00000009800,ENSOARG00000015044,ENSOARG00000021005,…	5	ENSOARG00000014824,ENSOARG00000000417,ENSOARG00000016285,ENSOARG00000021001,ENSOARG00000000450
GO:0048812	neuron projection morphogenesis	biological_process	8.6291e-05	0.0039463	30	677	362	19130	23	ENSOARG00000018226,ENSOARG00000007763,ENSOARG00000006007,ENSOARG00000020761,ENSOARG00000004499,ENSOARG00000005579,ENSOARG00000020138,ENSOARG00000017560,ENSOARG00000010939,ENSOARG00000010473,ENSOARG00000006358,ENSOARG00000007984,ENSOARG00000017420,ENSOARG00000014361,ENSOARG00000004787,ENSOARG00000006421,ENSOARG00000019503,ENSOARG00000020889,ENSOARG00000015286,ENSOARG00000018039,ENSOARG00000018838,…	7	ENSOARG00000011464,ENSOARG00000001487,ENSOARG00000015118,ENSOARG00000013752,ENSOARG00000006212,ENSOARG00000003149,ENSOARG00000011865
GO:0002696	positive regulation of leukocyte activation	biological_process	5.8839e-12	1.2917e-09	29	677	182	19130	28	ENSOARG00000003604,ENSOARG00000007229,ENSOARG00000008984,ENSOARG00000016138,ENSOARG00000017420,ENSOARG00000007525,ENSOARG00000013646,ENSOARG00000010939,ENSOARG00000019324,ENSOARG00000010199,ENSOARG00000006301,ENSOARG00000007932,ENSOARG00000008908,ENSOARG00000000058,ENSOARG00000014822,ENSOARG00000009800,ENSOARG00000007252,ENSOARG00000020968,ENSOARG00000011239,ENSOARG00000002699,ENSOARG00000013918,…	1	ENSOARG00000011019
GO:0050867	positive regulation of cell activation	biological_process	1.4243e-11	2.9815e-09	29	677	188	19130	28	ENSOARG00000010939,ENSOARG00000013646,ENSOARG00000007525,ENSOARG00000019324,ENSOARG00000017420,ENSOARG00000008984,ENSOARG00000016138,ENSOARG00000007229,ENSOARG00000003604,ENSOARG00000000058,ENSOARG00000014822,ENSOARG00000007932,ENSOARG00000008908,ENSOARG00000010199,ENSOARG00000006301,ENSOARG00000020968,ENSOARG00000007252,ENSOARG00000009800,ENSOARG00000020112,ENSOARG00000005792,ENSOARG00000016193,…	1	ENSOARG00000011019
GO:0002253	activation of immune response	biological_process	4.099e-10	6.0484e-08	29	677	203	19130	29	ENSOARG00000016042,ENSOARG00000020112,ENSOARG00000005792,ENSOARG00000015718,ENSOARG00000021000,ENSOARG00000008208,ENSOARG00000016133,ENSOARG00000011842,ENSOARG00000020968,ENSOARG00000017631,ENSOARG00000008057,ENSOARG00000021005,ENSOARG00000015044,ENSOARG00000010521,ENSOARG00000018775,ENSOARG00000009800,ENSOARG00000009301,ENSOARG00000015037,ENSOARG00000000950,ENSOARG00000008526,ENSOARG00000011171,…	0
GO:0071345	cellular response to cytokine stimulus	biological_process	1.334e-06	0.00010769	29	677	293	19130	28	ENSOARG00000002790,ENSOARG00000019197,ENSOARG00000011239,ENSOARG00000004787,ENSOARG00000009932,ENSOARG00000013918,ENSOARG00000008480,ENSOARG00000015177,ENSOARG00000014236,ENSOARG00000014631,ENSOARG00000007229,ENSOARG00000003604,ENSOARG00000014214,ENSOARG00000014023,ENSOARG00000006353,ENSOARG00000003908,ENSOARG00000016109,ENSOARG00000007525,ENSOARG00000006358,ENSOARG00000010462,ENSOARG00000020050,…	1	ENSOARG00000017168
GO:0007507	heart development	biological_process	0.00011896	0.0050989	29	677	358	19130	25	ENSOARG00000003844,ENSOARG00000017420,ENSOARG00000020233,ENSOARG00000019971,ENSOARG00000013317,ENSOARG00000019067,ENSOARG00000005365,ENSOARG00000016867,ENSOARG00000009999,ENSOARG00000021177,ENSOARG00000006614,ENSOARG00000012373,ENSOARG00000016790,ENSOARG00000012515,ENSOARG00000010448,ENSOARG00000019963,ENSOARG00000011235,ENSOARG00000013669,ENSOARG00000011933,ENSOARG00000016922,ENSOARG00000016047,…	4	ENSOARG00000011865,ENSOARG00000002366,ENSOARG00000013752,ENSOARG00000004312
GO:0008285	negative regulation of cell proliferation	biological_process	0.00070509	0.02196	29	677	422	19130	24	ENSOARG00000008285,ENSOARG00000006813,ENSOARG00000019324,ENSOARG00000006358,ENSOARG00000016017,ENSOARG00000017420,ENSOARG00000003844,ENSOARG00000009999,ENSOARG00000016937,ENSOARG00000017562,ENSOARG00000015037,ENSOARG00000020676,ENSOARG00000001574,ENSOARG00000017093,ENSOARG00000007932,ENSOARG00000001497,ENSOARG00000018775,ENSOARG00000002790,ENSOARG00000006614,ENSOARG00000005236,ENSOARG00000020475,…	5	ENSOARG00000011865,ENSOARG00000016764,ENSOARG00000013752,ENSOARG00000015118,ENSOARG00000006378
GO:0097190	apoptotic signaling pathway	biological_process	0.0016931	0.04443	29	677	448	19130	24	ENSOARG00000006421,ENSOARG00000003994,ENSOARG00000005846,ENSOARG00000008332,ENSOARG00000020741,ENSOARG00000016922,ENSOARG00000015718,ENSOARG00000015592,ENSOARG00000018189,ENSOARG00000010448,ENSOARG00000010493,ENSOARG00000008057,ENSOARG00000009921,ENSOARG00000015037,ENSOARG00000017205,ENSOARG00000000123,ENSOARG00000006007,ENSOARG00000020138,ENSOARG00000006353,ENSOARG00000008984,ENSOARG00000016138,…	5	ENSOARG00000004314,ENSOARG00000013752,ENSOARG00000000450,ENSOARG00000002555,ENSOARG00000000417
GO:0060326	cell chemotaxis	biological_process	2.2892e-12	5.6453e-10	28	677	174	19130	24	ENSOARG00000006813,ENSOARG00000004983,ENSOARG00000007229,ENSOARG00000003604,ENSOARG00000004774,ENSOARG00000012180,ENSOARG00000008285,ENSOARG00000012367,ENSOARG00000010199,ENSOARG00000006760,ENSOARG00000007932,ENSOARG00000000123,ENSOARG00000011146,ENSOARG00000009800,ENSOARG00000010543,ENSOARG00000010521,ENSOARG00000004721,ENSOARG00000006538,ENSOARG00000004787,ENSOARG00000002699,ENSOARG00000016133,…	4	ENSOARG00000000450,ENSOARG00000014723,ENSOARG00000000417,ENSOARG00000013151
GO:0009617	response to bacterium	biological_process	3.6464e-07	3.3491e-05	28	677	283	19130	27	ENSOARG00000016193,ENSOARG00000021000,ENSOARG00000014103,ENSOARG00000005792,ENSOARG00000020112,ENSOARG00000020667,ENSOARG00000009401,ENSOARG00000001980,ENSOARG00000007944,ENSOARG00000009800,ENSOARG00000010521,ENSOARG00000002820,ENSOARG00000015044,Novel00341,ENSOARG00000008908,ENSOARG00000009686,ENSOARG00000017205,ENSOARG00000006301,ENSOARG00000025180,ENSOARG00000016937,ENSOARG00000003782,ENSOARG0…	1	ENSOARG00000017769
GO:0043065	positive regulation of apoptotic process	biological_process	0.0001246	0.0052652	28	677	362	19130	24	ENSOARG00000018528,ENSOARG00000020741,ENSOARG00000018039,ENSOARG00000004015,ENSOARG00000016922,ENSOARG00000015718,ENSOARG00000017214,ENSOARG00000017034,ENSOARG00000014750,ENSOARG00000003994,ENSOARG00000004787,ENSOARG00000006421,ENSOARG00000010493,ENSOARG00000017892,ENSOARG00000017562,ENSOARG00000008908,ENSOARG00000009599,ENSOARG00000006007,ENSOARG00000016937,ENSOARG00000019324,ENSOARG00000010939,…	4	ENSOARG00000000417,ENSOARG00000016764,ENSOARG00000004314,ENSOARG00000000450
GO:0043068	positive regulation of programmed cell death	biological_process	0.00014356	0.0059546	28	677	365	19130	24	ENSOARG00000019324,ENSOARG00000010939,ENSOARG00000014582,ENSOARG00000006353,ENSOARG00000018510,ENSOARG00000017562,ENSOARG00000009599,ENSOARG00000006007,ENSOARG00000008908,ENSOARG00000016937,ENSOARG00000010493,ENSOARG00000017892,ENSOARG00000018528,ENSOARG00000020741,ENSOARG00000018039,ENSOARG00000004015,ENSOARG00000015718,ENSOARG00000016922,ENSOARG00000017214,ENSOARG00000017034,ENSOARG00000014750,…	4	ENSOARG00000004314,ENSOARG00000000450,ENSOARG00000000417,ENSOARG00000016764
GO:0010942	positive regulation of cell death	biological_process	0.00021292	0.0081207	28	677	374	19130	24	ENSOARG00000014750,ENSOARG00000003994,ENSOARG00000006421,ENSOARG00000004787,ENSOARG00000017034,ENSOARG00000017214,ENSOARG00000016922,ENSOARG00000015718,ENSOARG00000018039,ENSOARG00000004015,ENSOARG00000020741,ENSOARG00000018528,ENSOARG00000010493,ENSOARG00000017892,ENSOARG00000016937,ENSOARG00000009599,ENSOARG00000008908,ENSOARG00000006007,ENSOARG00000017562,ENSOARG00000018510,ENSOARG00000006353,…	4	ENSOARG00000016764,ENSOARG00000000417,ENSOARG00000000450,ENSOARG00000004314
GO:0048568	embryonic organ development	biological_process	0.00028925	0.010526	28	677	370	19130	17	ENSOARG00000015592,ENSOARG00000012515,ENSOARG00000016271,ENSOARG00000021018,ENSOARG00000015379,ENSOARG00000018039,ENSOARG00000002053,ENSOARG00000013317,ENSOARG00000019067,ENSOARG00000010939,ENSOARG00000017420,ENSOARG00000016622,ENSOARG00000021177,ENSOARG00000016867,ENSOARG00000009599,ENSOARG00000004499,ENSOARG00000007134	11	ENSOARG00000006034,ENSOARG00000019395,ENSOARG00000004414,ENSOARG00000016764,ENSOARG00000020376,ENSOARG00000016342,ENSOARG00000017769,ENSOARG00000002260,ENSOARG00000011056,ENSOARG00000008534,ENSOARG00000013752
GO:0032386	regulation of intracellular transport	biological_process	0.00067622	0.021208	28	677	401	19130	22	ENSOARG00000017420,ENSOARG00000019971,ENSOARG00000018510,ENSOARG00000003604,ENSOARG00000020138,ENSOARG00000017562,ENSOARG00000020050,ENSOARG00000016937,ENSOARG00000007864,ENSOARG00000017265,ENSOARG00000001202,ENSOARG00000008057,ENSOARG00000009800,ENSOARG00000015044,ENSOARG00000016193,ENSOARG00000004797,ENSOARG00000005792,ENSOARG00000004208,ENSOARG00000020889,ENSOARG00000002699,ENSOARG00000011437,…	6	ENSOARG00000000322,ENSOARG00000004312,ENSOARG00000005434,ENSOARG00000001504,ENSOARG00000017474,ENSOARG00000006526
GO:0051251	positive regulation of lymphocyte activation	biological_process	1.2829e-11	2.7171e-09	27	677	163	19130	26	ENSOARG00000020112,ENSOARG00000005792,ENSOARG00000015718,ENSOARG00000013509,ENSOARG00000016193,ENSOARG00000016133,ENSOARG00000013918,ENSOARG00000008340,ENSOARG00000011239,ENSOARG00000002699,ENSOARG00000020968,ENSOARG00000007252,ENSOARG00000014822,ENSOARG00000000058,ENSOARG00000007932,ENSOARG00000008908,ENSOARG00000010199,ENSOARG00000006301,ENSOARG00000007525,ENSOARG00000013646,ENSOARG00000019324,…	1	ENSOARG00000011019
GO:0002764	immune response-regulating signaling pathway	biological_process	1.7974e-09	2.3278e-07	27	677	189	19130	27	ENSOARG00000008057,ENSOARG00000021005,ENSOARG00000020968,ENSOARG00000020667,ENSOARG00000017631,ENSOARG00000018775,ENSOARG00000009800,ENSOARG00000015044,ENSOARG00000010521,ENSOARG00000015718,ENSOARG00000021000,ENSOARG00000008208,ENSOARG00000020112,ENSOARG00000016042,ENSOARG00000005792,ENSOARG00000011842,ENSOARG00000016133,ENSOARG00000013646,ENSOARG00000010939,ENSOARG00000015215,ENSOARG00000008984,…	0
GO:0001819	positive regulation of cytokine production	biological_process	5.0063e-07	4.4616e-05	27	677	255	19130	27	ENSOARG00000025180,ENSOARG00000016937,ENSOARG00000003782,ENSOARG00000017265,ENSOARG00000008908,ENSOARG00000000123,ENSOARG00000020249,ENSOARG00000014762,ENSOARG00000007229,ENSOARG00000010080,ENSOARG00000008984,ENSOARG00000020233,ENSOARG00000006358,ENSOARG00000010939,ENSOARG00000013918,ENSOARG00000021000,ENSOARG00000016193,ENSOARG00000013509,ENSOARG00000005792,ENSOARG00000009800,ENSOARG00000010521,…	0
GO:0002683	negative regulation of immune system process	biological_process	1.5248e-06	0.00012199	27	677	272	19130	25	ENSOARG00000007991,ENSOARG00000009401,ENSOARG00000013573,ENSOARG00000005236,ENSOARG00000015592,ENSOARG00000018775,ENSOARG00000009800,ENSOARG00000016042,ENSOARG00000006068,ENSOARG00000015177,ENSOARG00000008480,ENSOARG00000013509,ENSOARG00000011437,ENSOARG00000008091,ENSOARG00000004787,ENSOARG00000011239,ENSOARG00000019324,ENSOARG00000007525,ENSOARG00000016017,ENSOARG00000017420,ENSOARG00000007229,…	2	ENSOARG00000014425,ENSOARG00000011865
GO:0098542	defense response to other organism	biological_process	4.5298e-05	0.0023433	27	677	346	19130	24	Novel02027,ENSOARG00000003908,ENSOARG00000006139,ENSOARG00000006301,ENSOARG00000017265,ENSOARG00000020761,ENSOARG00000008908,Novel00341,ENSOARG00000008715,ENSOARG00000009686,ENSOARG00000007944,ENSOARG00000009800,ENSOARG00000002820,ENSOARG00000015044,ENSOARG00000008057,ENSOARG00000020667,ENSOARG00000009130,ENSOARG00000020734,ENSOARG00000015177,ENSOARG00000021000,ENSOARG00000015718,ENSOARG000000057…	3	Novel01381,ENSOARG00000021001,ENSOARG00000016285
GO:0014070	response to organic cyclic compound	biological_process	0.00016944	0.0067336	27	677	337	19130	15	ENSOARG00000015177,ENSOARG00000018039,ENSOARG00000016193,ENSOARG00000009301,ENSOARG00000004787,ENSOARG00000017265,ENSOARG00000017214,ENSOARG00000008057,ENSOARG00000008507,ENSOARG00000017892,ENSOARG00000010939,ENSOARG00000007984,ENSOARG00000014214,ENSOARG00000005075,ENSOARG00000002790	12	ENSOARG00000017474,ENSOARG00000017468,ENSOARG00000016766,ENSOARG00000019817,ENSOARG00000002366,ENSOARG00000021060,ENSOARG00000011128,ENSOARG00000004414,ENSOARG00000016285,ENSOARG00000018548,ENSOARG00000002449,ENSOARG00000017769
GO:0048667	cell morphogenesis involved in neuron differentiation	biological_process	0.00035763	0.012687	27	677	340	19130	21	ENSOARG00000005579,ENSOARG00000004499,ENSOARG00000006007,ENSOARG00000020761,ENSOARG00000007763,ENSOARG00000018226,ENSOARG00000017420,ENSOARG00000017560,ENSOARG00000007984,ENSOARG00000006358,ENSOARG00000010939,ENSOARG00000020138,ENSOARG00000018838,ENSOARG00000018039,ENSOARG00000020889,ENSOARG00000019503,ENSOARG00000015286,ENSOARG00000006421,ENSOARG00000004787,ENSOARG00000014361,ENSOARG00000002790	6	ENSOARG00000006212,ENSOARG00000003149,ENSOARG00000011865,ENSOARG00000001487,ENSOARG00000013752,ENSOARG00000015118
GO:0007389	pattern specification process	biological_process	0.0005132	0.016951	27	677	370	19130	15	ENSOARG00000016271,ENSOARG00000014361,ENSOARG00000015379,ENSOARG00000006553,ENSOARG00000015286,ENSOARG00000018039,ENSOARG00000001574,ENSOARG00000007134,ENSOARG00000017093,ENSOARG00000016306,ENSOARG00000012515,ENSOARG00000013317,ENSOARG00000019067,ENSOARG00000017420,ENSOARG00000006614	12	ENSOARG00000019395,ENSOARG00000006034,ENSOARG00000005781,ENSOARG00000006378,ENSOARG00000016342,ENSOARG00000009675,ENSOARG00000016363,ENSOARG00000002260,ENSOARG00000017964,ENSOARG00000012314,ENSOARG00000005434,ENSOARG00000013752
GO:0071363	cellular response to growth factor stimulus	biological_process	0.00065986	0.020825	27	677	371	19130	23	ENSOARG00000018039,ENSOARG00000016047,ENSOARG00000001783,ENSOARG00000020889,ENSOARG00000002223,ENSOARG00000006538,ENSOARG00000004787,ENSOARG00000015180,ENSOARG00000001060,ENSOARG00000017631,ENSOARG00000002144,ENSOARG00000006007,ENSOARG00000004499,ENSOARG00000017093,ENSOARG00000010199,ENSOARG00000009999,ENSOARG00000012784,ENSOARG00000008249,ENSOARG00000019067,ENSOARG00000003604,ENSOARG00000010080,…	4	ENSOARG00000016285,ENSOARG00000017769,ENSOARG00000021001,ENSOARG00000013752
GO:0070848	response to growth factor	biological_process	0.00084017	0.025208	27	677	377	19130	23	ENSOARG00000017631,ENSOARG00000001060,ENSOARG00000002144,ENSOARG00000001783,ENSOARG00000020889,ENSOARG00000002223,ENSOARG00000016047,ENSOARG00000018039,ENSOARG00000015180,ENSOARG00000006538,ENSOARG00000004787,ENSOARG00000019067,ENSOARG00000008249,ENSOARG00000012784,ENSOARG00000012180,ENSOARG00000020138,ENSOARG00000010080,ENSOARG00000003604,ENSOARG00000004499,ENSOARG00000017093,ENSOARG00000006007,…	4	ENSOARG00000016285,ENSOARG00000017769,ENSOARG00000021001,ENSOARG00000013752
GO:0022409	positive regulation of cell-cell adhesion	biological_process	1.0283e-11	2.2037e-09	26	677	148	19130	26	ENSOARG00000020112,ENSOARG00000015718,ENSOARG00000016193,ENSOARG00000013509,ENSOARG00000018039,ENSOARG00000016133,ENSOARG00000013918,ENSOARG00000011239,ENSOARG00000002699,ENSOARG00000020968,ENSOARG00000007252,ENSOARG00000000058,ENSOARG00000014822,ENSOARG00000000123,ENSOARG00000007932,ENSOARG00000008908,ENSOARG00000010199,ENSOARG00000006301,ENSOARG00000013646,ENSOARG00000013317,ENSOARG00000010939,…	0
GO:0002757	immune response-activating signal transduction	biological_process	2.1183e-09	2.6855e-07	26	677	177	19130	26	ENSOARG00000005792,ENSOARG00000020112,ENSOARG00000016042,ENSOARG00000015718,ENSOARG00000008208,ENSOARG00000021000,ENSOARG00000016133,ENSOARG00000011842,ENSOARG00000017631,ENSOARG00000020968,ENSOARG00000021005,ENSOARG00000008057,ENSOARG00000010521,ENSOARG00000015044,ENSOARG00000009800,ENSOARG00000018775,ENSOARG00000015037,ENSOARG00000009301,ENSOARG00000008526,ENSOARG00000011171,ENSOARG00000002039,…	0
GO:0040017	positive regulation of locomotion	biological_process	6.7567e-06	0.00044069	26	677	272	19130	22	ENSOARG00000015286,ENSOARG00000014236,ENSOARG00000012064,ENSOARG00000016133,ENSOARG00000021147,ENSOARG00000006538,ENSOARG00000004787,ENSOARG00000002699,ENSOARG00000001060,ENSOARG00000015044,ENSOARG00000015592,ENSOARG00000017562,ENSOARG00000007932,ENSOARG00000008908,ENSOARG00000017465,ENSOARG00000016937,ENSOARG00000006358,ENSOARG00000012180,ENSOARG00000007229,ENSOARG00000006813,ENSOARG00000003604,…	4	ENSOARG00000004871,ENSOARG00000021001,ENSOARG00000006526,ENSOARG00000014723
GO:0071900	regulation of protein serine/threonine kinase activity	biological_process	2.3796e-05	0.0013441	26	677	287	19130	20	ENSOARG00000006358,ENSOARG00000002811,ENSOARG00000003844,ENSOARG00000016017,ENSOARG00000012180,ENSOARG00000004484,ENSOARG00000020030,ENSOARG00000003963,ENSOARG00000018510,ENSOARG00000003798,ENSOARG00000017093,ENSOARG00000009653,ENSOARG00000006760,ENSOARG00000015592,ENSOARG00000008189,ENSOARG00000003206,ENSOARG00000005792,ENSOARG00000001254,ENSOARG00000015718,ENSOARG00000018039	6	ENSOARG00000020287,ENSOARG00000011128,ENSOARG00000011865,ENSOARG00000002260,ENSOARG00000011352,ENSOARG00000008521
GO:0043410	positive regulation of MAPK cascade	biological_process	3.1539e-05	0.001705	26	677	290	19130	21	ENSOARG00000005792,ENSOARG00000008332,ENSOARG00000008480,ENSOARG00000015718,ENSOARG00000001094,ENSOARG00000001060,ENSOARG00000008057,ENSOARG00000015592,ENSOARG00000010664,ENSOARG00000020761,ENSOARG00000003798,ENSOARG00000021097,ENSOARG00000014463,ENSOARG00000006760,ENSOARG00000016937,ENSOARG00000006358,ENSOARG00000016017,ENSOARG00000003844,ENSOARG00000012180,ENSOARG00000006353,ENSOARG00000007229	5	ENSOARG00000011865,ENSOARG00000002260,ENSOARG00000011352,ENSOARG00000008521,ENSOARG00000020287
GO:0090066	regulation of anatomical structure size	biological_process	5.0031e-05	0.0025299	26	677	304	19130	24	ENSOARG00000008232,ENSOARG00000009682,ENSOARG00000000158,ENSOARG00000015286,ENSOARG00000008480,ENSOARG00000020622,ENSOARG00000016888,ENSOARG00000016133,ENSOARG00000011239,ENSOARG00000004787,ENSOARG00000017892,ENSOARG00000001094,ENSOARG00000020959,ENSOARG00000009653,ENSOARG00000008908,ENSOARG00000012145,ENSOARG00000016937,ENSOARG00000020050,ENSOARG00000005365,ENSOARG00000012274,ENSOARG00000006029,…	2	ENSOARG00000006212,ENSOARG00000011128
GO:0048608	reproductive structure development	biological_process	0.00019038	0.0073703	26	677	326	19130	16	ENSOARG00000002790,ENSOARG00000009234,ENSOARG00000002475,ENSOARG00000015592,ENSOARG00000001060,ENSOARG00000004787,ENSOARG00000018039,ENSOARG00000015286,ENSOARG00000016334,ENSOARG00000014898,ENSOARG00000004403,ENSOARG00000014623,ENSOARG00000019067,ENSOARG00000007525,ENSOARG00000016867,ENSOARG00000021177	10	ENSOARG00000002260,ENSOARG00000011056,ENSOARG00000009675,ENSOARG00000002366,ENSOARG00000013752,ENSOARG00000007493,ENSOARG00000014425,ENSOARG00000004414,ENSOARG00000006378,ENSOARG00000017769
GO:0061458	reproductive system development	biological_process	0.00022861	0.0086096	26	677	330	19130	16	ENSOARG00000021177,ENSOARG00000016867,ENSOARG00000014623,ENSOARG00000004403,ENSOARG00000007525,ENSOARG00000019067,ENSOARG00000004787,ENSOARG00000014898,ENSOARG00000016334,ENSOARG00000015286,ENSOARG00000018039,ENSOARG00000015592,ENSOARG00000002475,ENSOARG00000009234,ENSOARG00000002790,ENSOARG00000001060	10	ENSOARG00000006378,ENSOARG00000017769,ENSOARG00000014425,ENSOARG00000004414,ENSOARG00000013752,ENSOARG00000007493,ENSOARG00000011056,ENSOARG00000002260,ENSOARG00000009675,ENSOARG00000002366
GO:0006897	endocytosis	biological_process	0.00052023	0.017152	26	677	339	19130	25	ENSOARG00000007525,ENSOARG00000016138,ENSOARG00000014188,ENSOARG00000003604,ENSOARG00000004983,ENSOARG00000018510,ENSOARG00000009301,ENSOARG00000007932,ENSOARG00000008908,ENSOARG00000001650,ENSOARG00000015172,ENSOARG00000003782,ENSOARG00000025180,ENSOARG00000003028,ENSOARG00000003585,ENSOARG00000020667,ENSOARG00000016857,ENSOARG00000002820,ENSOARG00000009800,ENSOARG00000020889,ENSOARG00000018528,…	1	ENSOARG00000014425
GO:0030217	T cell differentiation	biological_process	2.3249e-09	2.9268e-07	25	677	170	19130	24	ENSOARG00000014822,ENSOARG00000000571,ENSOARG00000005579,ENSOARG00000011171,ENSOARG00000021177,ENSOARG00000003782,ENSOARG00000010199,ENSOARG00000006301,ENSOARG00000003028,ENSOARG00000013646,ENSOARG00000017420,ENSOARG00000008984,ENSOARG00000007229,ENSOARG00000009172,ENSOARG00000015718,ENSOARG00000020734,ENSOARG00000008091,ENSOARG00000016133,ENSOARG00000008340,ENSOARG00000011239,ENSOARG00000020968,…	1	ENSOARG00000011865
GO:0001655	urogenital system development	biological_process	1.3333e-05	0.00081086	25	677	254	19130	18	ENSOARG00000012515,ENSOARG00000009234,ENSOARG00000018039,ENSOARG00000005007,ENSOARG00000014898,ENSOARG00000016334,ENSOARG00000004797,ENSOARG00000006538,ENSOARG00000004787,ENSOARG00000008349,ENSOARG00000017420,ENSOARG00000013317,ENSOARG00000004403,ENSOARG00000010080,ENSOARG00000014623,ENSOARG00000003798,ENSOARG00000008715,ENSOARG00000017093	7	ENSOARG00000006034,ENSOARG00000017964,ENSOARG00000002366,ENSOARG00000005781,ENSOARG00000016342,ENSOARG00000015118,ENSOARG00000013752
GO:0002697	regulation of immune effector process	biological_process	1.8616e-05	0.0010776	25	677	272	19130	22	ENSOARG00000000950,ENSOARG00000008715,ENSOARG00000020761,ENSOARG00000008908,ENSOARG00000017265,ENSOARG00000003782,ENSOARG00000012145,ENSOARG00000014085,ENSOARG00000010939,ENSOARG00000007229,ENSOARG00000004983,ENSOARG00000005792,ENSOARG00000015718,ENSOARG00000021000,ENSOARG00000015177,ENSOARG00000008340,ENSOARG00000011239,ENSOARG00000020667,ENSOARG00000008057,ENSOARG00000021005,ENSOARG00000015044,…	3	ENSOARG00000011019,ENSOARG00000016285,ENSOARG00000021001
GO:0061564	axon development	biological_process	0.00010627	0.0046433	25	677	282	19130	19	ENSOARG00000006007,ENSOARG00000004499,ENSOARG00000005579,ENSOARG00000007763,ENSOARG00000009999,ENSOARG00000018226,ENSOARG00000017420,ENSOARG00000007984,ENSOARG00000017560,ENSOARG00000010939,ENSOARG00000006358,ENSOARG00000020138,ENSOARG00000018039,ENSOARG00000018838,ENSOARG00000015286,ENSOARG00000014361,ENSOARG00000006421,ENSOARG00000004787,ENSOARG00000002790	6	ENSOARG00000015118,ENSOARG00000013752,ENSOARG00000001487,ENSOARG00000011865,ENSOARG00000006212,ENSOARG00000003149
GO:0043087	regulation of GTPase activity	biological_process	0.00066846	0.021038	25	677	311	19130	23	ENSOARG00000010543,ENSOARG00000008161,ENSOARG00000011933,ENSOARG00000016133,ENSOARG00000016888,ENSOARG00000013173,ENSOARG00000004787,ENSOARG00000019218,ENSOARG00000009682,ENSOARG00000020214,ENSOARG00000020437,ENSOARG00000004484,ENSOARG00000004983,ENSOARG00000017465,ENSOARG00000009999,ENSOARG00000003028,ENSOARG00000014288,ENSOARG00000003099,ENSOARG00000020818,ENSOARG00000019876,ENSOARG00000008908,…	2	ENSOARG00000006526,ENSOARG00000011865
GO:0070663	regulation of leukocyte proliferation	biological_process	2.4874e-10	3.8602e-08	24	677	147	19130	22	ENSOARG00000007252,ENSOARG00000005236,ENSOARG00000015592,ENSOARG00000018775,ENSOARG00000009234,ENSOARG00000005792,ENSOARG00000020112,ENSOARG00000015718,ENSOARG00000016193,ENSOARG00000013509,ENSOARG00000016133,ENSOARG00000013918,ENSOARG00000019324,ENSOARG00000013646,ENSOARG00000012131,ENSOARG00000016017,ENSOARG00000008984,ENSOARG00000003604,ENSOARG00000007229,ENSOARG00000015037,ENSOARG00000008908,…	2	ENSOARG00000011019,ENSOARG00000011865
GO:1903706	regulation of hemopoiesis	biological_process	6.13e-06	0.00040871	24	677	240	19130	23	ENSOARG00000020050,ENSOARG00000010199,ENSOARG00000014822,ENSOARG00000007229,ENSOARG00000017420,ENSOARG00000019324,ENSOARG00000013646,ENSOARG00000012131,ENSOARG00000007525,ENSOARG00000011239,ENSOARG00000016133,ENSOARG00000008091,ENSOARG00000006068,ENSOARG00000016922,ENSOARG00000015718,ENSOARG00000004208,ENSOARG00000001783,ENSOARG00000006553,ENSOARG00000015592,ENSOARG00000001060,ENSOARG00000007991,…	1	ENSOARG00000011865
GO:1903034	regulation of response to wounding	biological_process	1.2155e-05	0.00075193	24	677	249	19130	19	ENSOARG00000009682,ENSOARG00000005792,ENSOARG00000006068,ENSOARG00000009401,ENSOARG00000020667,ENSOARG00000013573,ENSOARG00000008057,ENSOARG00000015044,ENSOARG00000009800,ENSOARG00000017205,ENSOARG00000020861,ENSOARG00000000950,ENSOARG00000008526,ENSOARG00000000123,ENSOARG00000008908,ENSOARG00000008473,ENSOARG00000016937,ENSOARG00000005117,ENSOARG00000012362	5	ENSOARG00000000417,ENSOARG00000014824,ENSOARG00000000450,ENSOARG00000020519,Novel02176
GO:2000147	positive regulation of cell motility	biological_process	2.0025e-05	0.0011517	24	677	256	19130	20	ENSOARG00000008908,ENSOARG00000007932,ENSOARG00000017465,ENSOARG00000016937,ENSOARG00000006358,ENSOARG00000012180,ENSOARG00000002263,ENSOARG00000003604,ENSOARG00000007229,ENSOARG00000006813,ENSOARG00000015286,ENSOARG00000014236,ENSOARG00000012064,ENSOARG00000016133,ENSOARG00000002699,ENSOARG00000021147,ENSOARG00000006538,ENSOARG00000001060,ENSOARG00000015592,ENSOARG00000015044	4	ENSOARG00000014723,ENSOARG00000006526,ENSOARG00000021001,ENSOARG00000004871
GO:0051272	positive regulation of cellular component movement	biological_process	3.2836e-05	0.0017645	24	677	263	19130	20	ENSOARG00000001060,ENSOARG00000015592,ENSOARG00000015044,ENSOARG00000012064,ENSOARG00000014236,ENSOARG00000015286,ENSOARG00000002699,ENSOARG00000021147,ENSOARG00000006538,ENSOARG00000016133,ENSOARG00000006358,ENSOARG00000002263,ENSOARG00000006813,ENSOARG00000007229,ENSOARG00000003604,ENSOARG00000012180,ENSOARG00000008908,ENSOARG00000007932,ENSOARG00000016937,ENSOARG00000017465	4	ENSOARG00000014723,ENSOARG00000006526,ENSOARG00000021001,ENSOARG00000004871
GO:0007409	axonogenesis	biological_process	0.00014537	0.006016	24	677	270	19130	18	ENSOARG00000020138,ENSOARG00000017420,ENSOARG00000017560,ENSOARG00000006358,ENSOARG00000010939,ENSOARG00000007984,ENSOARG00000018226,ENSOARG00000004499,ENSOARG00000005579,ENSOARG00000006007,ENSOARG00000007763,ENSOARG00000002790,ENSOARG00000006421,ENSOARG00000004787,ENSOARG00000014361,ENSOARG00000018838,ENSOARG00000018039,ENSOARG00000015286	6	ENSOARG00000006212,ENSOARG00000003149,ENSOARG00000011865,ENSOARG00000001487,ENSOARG00000015118,ENSOARG00000013752
GO:0001525	angiogenesis	biological_process	0.0001572	0.0063735	24	677	285	19130	24	ENSOARG00000017807,ENSOARG00000017562,ENSOARG00000005579,ENSOARG00000000123,ENSOARG00000009999,ENSOARG00000016798,ENSOARG00000017465,ENSOARG00000010199,ENSOARG00000014582,ENSOARG00000012180,ENSOARG00000014623,ENSOARG00000006813,ENSOARG00000002263,ENSOARG00000016042,ENSOARG00000006553,ENSOARG00000009827,ENSOARG00000016922,ENSOARG00000016193,ENSOARG00000000405,ENSOARG00000004787,ENSOARG00000014361,…	0
GO:0051493	regulation of cytoskeleton organization	biological_process	0.00033245	0.011922	24	677	303	19130	23	ENSOARG00000010664,ENSOARG00000008908,ENSOARG00000008715,ENSOARG00000020050,ENSOARG00000006760,ENSOARG00000005365,ENSOARG00000012145,ENSOARG00000006029,ENSOARG00000006358,ENSOARG00000018510,ENSOARG00000003604,ENSOARG00000020622,ENSOARG00000008480,ENSOARG00000009682,ENSOARG00000003206,ENSOARG00000017739,ENSOARG00000008349,ENSOARG00000004787,ENSOARG00000016888,ENSOARG00000016133,ENSOARG00000020959,…	1	ENSOARG00000019235
GO:0030595	leukocyte chemotaxis	biological_process	2.847e-12	6.656e-10	23	677	114	19130	19	ENSOARG00000011146,ENSOARG00000000123,ENSOARG00000007932,ENSOARG00000012180,ENSOARG00000008285,ENSOARG00000004983,ENSOARG00000007229,ENSOARG00000003604,ENSOARG00000006813,ENSOARG00000012367,ENSOARG00000016133,ENSOARG00000004787,ENSOARG00000002699,ENSOARG00000014236,ENSOARG00000009000,ENSOARG00000012064,ENSOARG00000010521,ENSOARG00000010543,ENSOARG00000009800	4	ENSOARG00000000450,ENSOARG00000013151,ENSOARG00000014723,ENSOARG00000000417
GO:1903039	positive regulation of leukocyte cell-cell adhesion	biological_process	1.7806e-11	3.6426e-09	23	677	120	19130	23	ENSOARG00000020968,ENSOARG00000007252,ENSOARG00000013918,ENSOARG00000016133,ENSOARG00000002699,ENSOARG00000011239,ENSOARG00000020112,ENSOARG00000016193,ENSOARG00000015718,ENSOARG00000013509,ENSOARG00000016138,ENSOARG00000008984,ENSOARG00000003604,ENSOARG00000007229,ENSOARG00000010939,ENSOARG00000013646,ENSOARG00000017420,ENSOARG00000006301,ENSOARG00000010199,ENSOARG00000014822,ENSOARG00000000058,…	0
GO:0034112	positive regulation of homotypic cell-cell adhesion	biological_process	2.1585e-11	4.2701e-09	23	677	121	19130	23	ENSOARG00000007252,ENSOARG00000020968,ENSOARG00000011239,ENSOARG00000002699,ENSOARG00000016133,ENSOARG00000013918,ENSOARG00000016193,ENSOARG00000015718,ENSOARG00000013509,ENSOARG00000020112,ENSOARG00000007229,ENSOARG00000003604,ENSOARG00000008984,ENSOARG00000016138,ENSOARG00000017420,ENSOARG00000013646,ENSOARG00000010939,ENSOARG00000010199,ENSOARG00000006301,ENSOARG00000007932,ENSOARG00000008908,…	0
GO:0050670	regulation of lymphocyte proliferation	biological_process	9.3005e-10	1.308e-07	23	677	144	19130	21	ENSOARG00000016133,ENSOARG00000013918,ENSOARG00000016193,ENSOARG00000015718,ENSOARG00000013509,ENSOARG00000005792,ENSOARG00000020112,ENSOARG00000009234,ENSOARG00000018775,ENSOARG00000007252,ENSOARG00000005236,ENSOARG00000008908,ENSOARG00000007932,ENSOARG00000015037,ENSOARG00000007229,ENSOARG00000003604,ENSOARG00000008984,ENSOARG00000016017,ENSOARG00000019324,ENSOARG00000013646,ENSOARG00000012131	2	ENSOARG00000011019,ENSOARG00000011865
GO:0032944	regulation of mononuclear cell proliferation	biological_process	1.0894e-09	1.4857e-07	23	677	145	19130	21	ENSOARG00000013918,ENSOARG00000016133,ENSOARG00000020112,ENSOARG00000005792,ENSOARG00000013509,ENSOARG00000015718,ENSOARG00000016193,ENSOARG00000009234,ENSOARG00000018775,ENSOARG00000005236,ENSOARG00000007252,ENSOARG00000015037,ENSOARG00000007932,ENSOARG00000008908,ENSOARG00000008984,ENSOARG00000003604,ENSOARG00000007229,ENSOARG00000013646,ENSOARG00000012131,ENSOARG00000019324,ENSOARG00000016017	2	ENSOARG00000011019,ENSOARG00000011865
GO:0002443	leukocyte mediated immunity	biological_process	4.0066e-08	4.319e-06	23	677	171	19130	22	ENSOARG00000015044,ENSOARG00000009800,ENSOARG00000020667,ENSOARG00000008057,ENSOARG00000021005,ENSOARG00000008340,ENSOARG00000003994,ENSOARG00000011239,ENSOARG00000005792,ENSOARG00000015718,ENSOARG00000021000,ENSOARG00000020734,ENSOARG00000004983,ENSOARG00000007229,ENSOARG00000003604,ENSOARG00000010939,ENSOARG00000008001,ENSOARG00000019324,ENSOARG00000012145,ENSOARG00000003782,ENSOARG00000014085,…	1	ENSOARG00000011019
GO:0072001	renal system development	biological_process	1.3125e-05	0.00080093	23	677	222	19130	17	ENSOARG00000014898,ENSOARG00000016334,ENSOARG00000004797,ENSOARG00000018039,ENSOARG00000005007,ENSOARG00000008349,ENSOARG00000004787,ENSOARG00000006538,ENSOARG00000012515,ENSOARG00000017093,ENSOARG00000003798,ENSOARG00000008715,ENSOARG00000013317,ENSOARG00000017420,ENSOARG00000014623,ENSOARG00000010080,ENSOARG00000004403	6	ENSOARG00000017964,ENSOARG00000006034,ENSOARG00000016342,ENSOARG00000013752,ENSOARG00000015118,ENSOARG00000005781
GO:0030335	positive regulation of cell migration	biological_process	4.4334e-05	0.0023	23	677	251	19130	20	ENSOARG00000012064,ENSOARG00000015286,ENSOARG00000014236,ENSOARG00000002699,ENSOARG00000006538,ENSOARG00000021147,ENSOARG00000016133,ENSOARG00000001060,ENSOARG00000015592,ENSOARG00000015044,ENSOARG00000008908,ENSOARG00000007932,ENSOARG00000016937,ENSOARG00000017465,ENSOARG00000006358,ENSOARG00000002263,ENSOARG00000003604,ENSOARG00000007229,ENSOARG00000006813,ENSOARG00000012180	3	ENSOARG00000014723,ENSOARG00000021001,ENSOARG00000004871
GO:0003013	circulatory system process	biological_process	6.4964e-05	0.0031353	23	677	255	19130	18	ENSOARG00000001094,ENSOARG00000012515,ENSOARG00000017892,ENSOARG00000013669,ENSOARG00000008232,ENSOARG00000000158,ENSOARG00000015286,ENSOARG00000004787,ENSOARG00000013176,ENSOARG00000020233,ENSOARG00000016017,ENSOARG00000019971,ENSOARG00000012274,ENSOARG00000008262,ENSOARG00000010410,ENSOARG00000009653,ENSOARG00000016937,ENSOARG00000017465	5	ENSOARG00000011056,ENSOARG00000017474,ENSOARG00000004312,ENSOARG00000011128,ENSOARG00000001504
GO:0002768	immune response-regulating cell surface receptor signaling pathway	biological_process	6.2109e-11	1.1181e-08	22	677	111	19130	22	ENSOARG00000018775,ENSOARG00000009800,ENSOARG00000015044,ENSOARG00000010521,ENSOARG00000021005,ENSOARG00000020968,ENSOARG00000020667,ENSOARG00000017631,ENSOARG00000011842,ENSOARG00000016133,ENSOARG00000008208,ENSOARG00000015718,ENSOARG00000021000,ENSOARG00000016042,ENSOARG00000015215,ENSOARG00000008984,ENSOARG00000003254,ENSOARG00000010939,ENSOARG00000013646,ENSOARG00000002039,ENSOARG00000011171,…	0
GO:0050870	positive regulation of T cell activation	biological_process	8.0858e-11	1.3604e-08	22	677	118	19130	22	ENSOARG00000007252,ENSOARG00000020968,ENSOARG00000011239,ENSOARG00000002699,ENSOARG00000013918,ENSOARG00000016133,ENSOARG00000013509,ENSOARG00000015718,ENSOARG00000016193,ENSOARG00000020112,ENSOARG00000003604,ENSOARG00000007229,ENSOARG00000008984,ENSOARG00000016138,ENSOARG00000017420,ENSOARG00000013646,ENSOARG00000010199,ENSOARG00000006301,ENSOARG00000007932,ENSOARG00000008908,ENSOARG00000000058,…	0
GO:0042098	T cell proliferation	biological_process	1.5838e-09	2.0965e-07	22	677	135	19130	21	ENSOARG00000013173,ENSOARG00000016133,ENSOARG00000013918,ENSOARG00000013509,ENSOARG00000015718,ENSOARG00000016193,ENSOARG00000009000,ENSOARG00000020112,ENSOARG00000018775,ENSOARG00000005236,ENSOARG00000007252,ENSOARG00000003028,ENSOARG00000007932,ENSOARG00000008908,ENSOARG00000015037,ENSOARG00000003604,ENSOARG00000009250,ENSOARG00000008984,ENSOARG00000016017,ENSOARG00000013646,ENSOARG00000012367	1	ENSOARG00000011865
GO:0048705	skeletal system morphogenesis	biological_process	2.8136e-06	0.00021192	22	677	196	19130	11	ENSOARG00000006538,ENSOARG00000015379,ENSOARG00000007134,ENSOARG00000004499,ENSOARG00000018039,ENSOARG00000004403,ENSOARG00000016306,ENSOARG00000019663,ENSOARG00000005711,ENSOARG00000008507,ENSOARG00000017420	11	ENSOARG00000019395,ENSOARG00000006034,ENSOARG00000002449,ENSOARG00000004871,ENSOARG00000016342,ENSOARG00000020376,ENSOARG00000008534,ENSOARG00000002260,ENSOARG00000011056,ENSOARG00000011128,ENSOARG00000013752
GO:0019221	cytokine-mediated signaling pathway	biological_process	3.0699e-06	0.00022743	22	677	198	19130	22	ENSOARG00000010462,ENSOARG00000000123,ENSOARG00000014277,ENSOARG00000017562,ENSOARG00000011146,ENSOARG00000017205,ENSOARG00000014214,ENSOARG00000007229,ENSOARG00000014023,ENSOARG00000006353,ENSOARG00000016109,ENSOARG00000003908,ENSOARG00000007525,ENSOARG00000006358,ENSOARG00000009932,ENSOARG00000011239,ENSOARG00000004787,ENSOARG00000013918,ENSOARG00000014236,ENSOARG00000014631,ENSOARG00000002790,…	0
GO:0032970	regulation of actin filament-based process	biological_process	4.7025e-05	0.0024108	22	677	236	19130	20	ENSOARG00000016888,ENSOARG00000016133,ENSOARG00000004787,ENSOARG00000008349,ENSOARG00000009682,ENSOARG00000008480,ENSOARG00000020622,ENSOARG00000009401,ENSOARG00000020959,ENSOARG00000012145,ENSOARG00000020050,ENSOARG00000005365,ENSOARG00000006760,ENSOARG00000008715,ENSOARG00000008908,ENSOARG00000003604,ENSOARG00000008262,ENSOARG00000006358,ENSOARG00000006029,ENSOARG00000019971	2	ENSOARG00000017474,ENSOARG00000004312
GO:0007015	actin filament organization	biological_process	9.5898e-05	0.0043267	22	677	246	19130	22	ENSOARG00000007932,ENSOARG00000008715,ENSOARG00000008908,ENSOARG00000020050,ENSOARG00000005365,ENSOARG00000006760,ENSOARG00000012145,ENSOARG00000007864,ENSOARG00000006029,ENSOARG00000003604,ENSOARG00000000276,ENSOARG00000008480,ENSOARG00000020622,ENSOARG00000009682,ENSOARG00000004787,ENSOARG00000008349,ENSOARG00000008705,ENSOARG00000016888,ENSOARG00000016133,ENSOARG00000020959,ENSOARG00000009401,…	0
GO:0052547	regulation of peptidase activity	biological_process	0.00010749	0.0046818	22	677	266	19130	18	ENSOARG00000008332,ENSOARG00000020741,ENSOARG00000018337,ENSOARG00000005926,ENSOARG00000016922,ENSOARG00000017214,ENSOARG00000002699,ENSOARG00000017892,ENSOARG00000013157,ENSOARG00000011768,ENSOARG00000018210,ENSOARG00000000950,ENSOARG00000008908,ENSOARG00000021090,ENSOARG00000016937,ENSOARG00000014582,ENSOARG00000001568,ENSOARG00000018510	4	ENSOARG00000020519,ENSOARG00000000450,ENSOARG00000007493,ENSOARG00000000417
GO:0008015	blood circulation	biological_process	0.0001512	0.0062001	22	677	252	19130	17	ENSOARG00000013176,ENSOARG00000004787,ENSOARG00000000158,ENSOARG00000008232,ENSOARG00000015286,ENSOARG00000013669,ENSOARG00000017892,ENSOARG00000012515,ENSOARG00000001094,ENSOARG00000017465,ENSOARG00000016937,ENSOARG00000009653,ENSOARG00000010410,ENSOARG00000008262,ENSOARG00000012274,ENSOARG00000019971,ENSOARG00000016017	5	ENSOARG00000004312,ENSOARG00000011128,ENSOARG00000001504,ENSOARG00000011056,ENSOARG00000017474
GO:0051346	negative regulation of hydrolase activity	biological_process	0.00040446	0.014002	22	677	283	19130	20	ENSOARG00000018210,ENSOARG00000013157,ENSOARG00000017214,ENSOARG00000016133,ENSOARG00000012344,ENSOARG00000002699,ENSOARG00000004787,ENSOARG00000018337,ENSOARG00000008332,ENSOARG00000015177,ENSOARG00000001568,ENSOARG00000018510,ENSOARG00000020030,ENSOARG00000015144,ENSOARG00000019971,ENSOARG00000021090,ENSOARG00000017465,ENSOARG00000000950,ENSOARG00000009653,ENSOARG00000017093	2	ENSOARG00000007493,ENSOARG00000020519
GO:0001503	ossification	biological_process	0.00071435	0.022134	22	677	278	19130	15	ENSOARG00000004797,ENSOARG00000018039,ENSOARG00000008715,ENSOARG00000014103,ENSOARG00000008480,ENSOARG00000004499,ENSOARG00000014188,ENSOARG00000005322,ENSOARG00000008507,ENSOARG00000005711,ENSOARG00000019663,ENSOARG00000012392,ENSOARG00000009401,ENSOARG00000017420,ENSOARG00000008249	7	ENSOARG00000006034,ENSOARG00000004414,ENSOARG00000017168,ENSOARG00000013752,ENSOARG00000004871,ENSOARG00000011128,ENSOARG00000017769
GO:0033674	positive regulation of kinase activity	biological_process	0.0020059	0.050574	22	677	297	19130	17	ENSOARG00000006358,ENSOARG00000003844,ENSOARG00000016017,ENSOARG00000012180,ENSOARG00000018510,ENSOARG00000014762,ENSOARG00000020761,ENSOARG00000003798,ENSOARG00000006301,ENSOARG00000006760,ENSOARG00000010448,ENSOARG00000015592,ENSOARG00000001158,ENSOARG00000005792,ENSOARG00000015718,ENSOARG00000016133,ENSOARG00000006538	5	ENSOARG00000008521,ENSOARG00000011865,ENSOARG00000002260,ENSOARG00000011352,ENSOARG00000020287
GO:0002429	immune response-activating cell surface receptor signaling pathway	biological_process	6.9014e-11	1.1832e-08	21	677	101	19130	21	ENSOARG00000016042,ENSOARG00000008208,ENSOARG00000015718,ENSOARG00000021000,ENSOARG00000016133,ENSOARG00000011842,ENSOARG00000017631,ENSOARG00000020968,ENSOARG00000021005,ENSOARG00000010521,ENSOARG00000015044,ENSOARG00000018775,ENSOARG00000009800,ENSOARG00000015037,ENSOARG00000011171,ENSOARG00000002039,ENSOARG00000010939,ENSOARG00000013646,ENSOARG00000003254,ENSOARG00000008984,ENSOARG00000015215	0
GO:0043405	regulation of MAP kinase activity	biological_process	1.917e-06	0.00015202	21	677	173	19130	15	ENSOARG00000016017,ENSOARG00000003844,ENSOARG00000020030,ENSOARG00000003963,ENSOARG00000012180,ENSOARG00000015592,ENSOARG00000004484,ENSOARG00000015718,ENSOARG00000003798,ENSOARG00000009653,ENSOARG00000017093,ENSOARG00000001254,ENSOARG00000018039,ENSOARG00000005792,ENSOARG00000006760	6	ENSOARG00000008521,ENSOARG00000011352,ENSOARG00000011865,ENSOARG00000002260,ENSOARG00000011128,ENSOARG00000020287
GO:0001822	kidney development	biological_process	3.3441e-05	0.0017917	21	677	205	19130	15	ENSOARG00000016334,ENSOARG00000004797,ENSOARG00000014898,ENSOARG00000017093,ENSOARG00000003798,ENSOARG00000005007,ENSOARG00000018039,ENSOARG00000006538,ENSOARG00000004787,ENSOARG00000008349,ENSOARG00000012515,ENSOARG00000017420,ENSOARG00000010080,ENSOARG00000014623,ENSOARG00000004403	6	ENSOARG00000017964,ENSOARG00000006034,ENSOARG00000016342,ENSOARG00000013752,ENSOARG00000015118,ENSOARG00000005781
GO:0052548	regulation of endopeptidase activity	biological_process	8.3271e-05	0.0038241	21	677	240	19130	17	ENSOARG00000018210,ENSOARG00000017892,ENSOARG00000011768,ENSOARG00000013157,ENSOARG00000017214,ENSOARG00000002699,ENSOARG00000008332,ENSOARG00000020741,ENSOARG00000018337,ENSOARG00000016922,ENSOARG00000001568,ENSOARG00000018510,ENSOARG00000014582,ENSOARG00000021090,ENSOARG00000016937,ENSOARG00000000950,ENSOARG00000008908	4	ENSOARG00000007493,ENSOARG00000020519,ENSOARG00000000450,ENSOARG00000000417
GO:0043254	regulation of protein complex assembly	biological_process	0.00011801	0.00507	21	677	238	19130	20	ENSOARG00000009234,ENSOARG00000002144,ENSOARG00000020959,ENSOARG00000009401,ENSOARG00000005846,ENSOARG00000004787,ENSOARG00000016888,ENSOARG00000016133,ENSOARG00000020622,ENSOARG00000008480,ENSOARG00000009682,ENSOARG00000018510,ENSOARG00000003604,ENSOARG00000006029,ENSOARG00000020050,ENSOARG00000005365,ENSOARG00000012145,ENSOARG00000007864,ENSOARG00000009999,ENSOARG00000008908	1	ENSOARG00000000322
GO:0045087	innate immune response	biological_process	0.00017682	0.0069806	21	677	237	19130	18	ENSOARG00000015177,ENSOARG00000021000,ENSOARG00000005792,ENSOARG00000020112,ENSOARG00000013918,ENSOARG00000021005,ENSOARG00000008057,ENSOARG00000009800,ENSOARG00000015044,ENSOARG00000008526,ENSOARG00000000950,ENSOARG00000009301,ENSOARG00000000058,ENSOARG00000014085,ENSOARG00000017265,ENSOARG00000018510,ENSOARG00000004983,ENSOARG00000003604	3	ENSOARG00000000417,ENSOARG00000017769,ENSOARG00000000450
GO:0034504	protein localization to nucleus	biological_process	0.00020756	0.007967	21	677	236	19130	16	ENSOARG00000020050,ENSOARG00000016937,ENSOARG00000017265,ENSOARG00000009999,ENSOARG00000017420,ENSOARG00000018039,ENSOARG00000016193,ENSOARG00000004797,ENSOARG00000005792,ENSOARG00000004208,ENSOARG00000002699,ENSOARG00000021147,ENSOARG00000015180,ENSOARG00000011437,ENSOARG00000008057,ENSOARG00000015044	5	ENSOARG00000017474,ENSOARG00000006034,ENSOARG00000002386,ENSOARG00000005434,ENSOARG00000004871
GO:0042060	wound healing	biological_process	0.00039691	0.013794	21	677	249	19130	15	ENSOARG00000005792,ENSOARG00000002223,ENSOARG00000008473,ENSOARG00000008480,ENSOARG00000000123,ENSOARG00000003319,ENSOARG00000005117,ENSOARG00000016937,ENSOARG00000012362,ENSOARG00000007525,ENSOARG00000017892,ENSOARG00000018445,ENSOARG00000016622,ENSOARG00000012360,ENSOARG00000009800	6	ENSOARG00000000417,ENSOARG00000014425,ENSOARG00000011865,ENSOARG00000013752,ENSOARG00000020519,Novel02176
GO:0048562	embryonic organ morphogenesis	biological_process	0.00046283	0.015515	21	677	252	19130	12	ENSOARG00000021018,ENSOARG00000016271,ENSOARG00000018039,ENSOARG00000009599,ENSOARG00000002053,ENSOARG00000007134,ENSOARG00000004499,ENSOARG00000015379,ENSOARG00000017420,ENSOARG00000016622,ENSOARG00000010939,ENSOARG00000013317	9	ENSOARG00000006034,ENSOARG00000019395,ENSOARG00000016764,ENSOARG00000020376,ENSOARG00000016342,ENSOARG00000002260,ENSOARG00000011056,ENSOARG00000008534,ENSOARG00000013752
GO:0051051	negative regulation of transport	biological_process	0.0012491	0.034944	21	677	287	19130	18	ENSOARG00000016937,ENSOARG00000019971,ENSOARG00000014188,ENSOARG00000005322,ENSOARG00000019670,ENSOARG00000006979,ENSOARG00000006353,ENSOARG00000006737,ENSOARG00000018510,ENSOARG00000003604,ENSOARG00000007229,ENSOARG00000004797,ENSOARG00000020889,ENSOARG00000011437,ENSOARG00000002699,ENSOARG00000017631,ENSOARG00000010448,ENSOARG00000009401	3	ENSOARG00000001504,ENSOARG00000002386,ENSOARG00000006526
GO:0045860	positive regulation of protein kinase activity	biological_process	0.0014046	0.038428	21	677	271	19130	16	ENSOARG00000016133,ENSOARG00000015718,ENSOARG00000005792,ENSOARG00000001158,ENSOARG00000015592,ENSOARG00000010448,ENSOARG00000006301,ENSOARG00000006760,ENSOARG00000020761,ENSOARG00000003798,ENSOARG00000014762,ENSOARG00000018510,ENSOARG00000012180,ENSOARG00000003844,ENSOARG00000016017,ENSOARG00000006358	5	ENSOARG00000020287,ENSOARG00000008521,ENSOARG00000011352,ENSOARG00000011865,ENSOARG00000002260
GO:0060537	muscle tissue development	biological_process	0.0017861	0.046197	21	677	280	19130	17	ENSOARG00000011235,ENSOARG00000010493,ENSOARG00000006614,ENSOARG00000016790,ENSOARG00000017214,ENSOARG00000006538,ENSOARG00000014123,ENSOARG00000001783,ENSOARG00000014623,ENSOARG00000015236,ENSOARG00000019067,ENSOARG00000013317,ENSOARG00000003844,ENSOARG00000020233,ENSOARG00000019971,ENSOARG00000005365,ENSOARG00000001574	4	ENSOARG00000016285,ENSOARG00000002366,ENSOARG00000004312,ENSOARG00000013752
GO:0042326	negative regulation of phosphorylation	biological_process	0.0020595	0.05178	21	677	290	19130	19	ENSOARG00000002144,ENSOARG00000008189,ENSOARG00000010493,ENSOARG00000011437,ENSOARG00000012344,ENSOARG00000004787,ENSOARG00000005792,ENSOARG00000004797,ENSOARG00000003206,ENSOARG00000018039,ENSOARG00000015718,ENSOARG00000014188,ENSOARG00000004484,ENSOARG00000003963,ENSOARG00000020030,ENSOARG00000009999,ENSOARG00000000571,ENSOARG00000017093,ENSOARG00000009653	2	ENSOARG00000016285,ENSOARG00000013752
GO:0097529	myeloid leukocyte migration	biological_process	1.1872e-10	1.943e-08	20	677	100	19130	17	ENSOARG00000012180,ENSOARG00000008285,ENSOARG00000004983,ENSOARG00000007229,ENSOARG00000006813,ENSOARG00000012367,ENSOARG00000007932,ENSOARG00000000123,ENSOARG00000010543,ENSOARG00000010521,ENSOARG00000009800,ENSOARG00000009401,ENSOARG00000016133,ENSOARG00000004787,ENSOARG00000009000,ENSOARG00000014236,ENSOARG00000012064	3	ENSOARG00000000450,ENSOARG00000013151,ENSOARG00000000417
GO:0002250	adaptive immune response	biological_process	4.9e-07	4.4105e-05	20	677	151	19130	19	ENSOARG00000020667,ENSOARG00000009800,ENSOARG00000016193,ENSOARG00000015718,ENSOARG00000008480,ENSOARG00000020734,ENSOARG00000020889,ENSOARG00000003994,ENSOARG00000011239,ENSOARG00000008340,ENSOARG00000008001,ENSOARG00000019324,ENSOARG00000007229,ENSOARG00000005579,ENSOARG00000000058,ENSOARG00000020861,ENSOARG00000011171,ENSOARG00000012145,ENSOARG00000003782	1	ENSOARG00000011019
GO:0032103	positive regulation of response to external stimulus	biological_process	1.1865e-06	9.6214e-05	20	677	164	19130	17	ENSOARG00000014236,ENSOARG00000012064,ENSOARG00000016133,ENSOARG00000004787,ENSOARG00000002699,ENSOARG00000009401,ENSOARG00000020667,ENSOARG00000008057,ENSOARG00000001060,ENSOARG00000015044,ENSOARG00000009800,ENSOARG00000017562,ENSOARG00000020861,ENSOARG00000000123,ENSOARG00000007932,ENSOARG00000006813,ENSOARG00000007229	3	ENSOARG00000000417,ENSOARG00000014723,ENSOARG00000000450
GO:0060485	mesenchyme development	biological_process	1.9522e-06	0.00015347	20	677	162	19130	16	ENSOARG00000014623,ENSOARG00000019067,ENSOARG00000021177,ENSOARG00000002144,ENSOARG00000015592,ENSOARG00000010448,ENSOARG00000006614,ENSOARG00000015180,ENSOARG00000015286,ENSOARG00000020889,ENSOARG00000000158,ENSOARG00000015379,ENSOARG00000004797,ENSOARG00000016047,ENSOARG00000014774,ENSOARG00000018039	4	ENSOARG00000004871,ENSOARG00000013752,ENSOARG00000016764,ENSOARG00000006034
GO:1902105	regulation of leukocyte differentiation	biological_process	6.781e-06	0.00044069	20	677	177	19130	19	ENSOARG00000020050,ENSOARG00000010199,ENSOARG00000014822,ENSOARG00000007229,ENSOARG00000017420,ENSOARG00000019324,ENSOARG00000007525,ENSOARG00000012131,ENSOARG00000013646,ENSOARG00000011239,ENSOARG00000016133,ENSOARG00000008091,ENSOARG00000016922,ENSOARG00000015718,ENSOARG00000001783,ENSOARG00000015592,ENSOARG00000007991,ENSOARG00000020968,ENSOARG00000005167	1	ENSOARG00000011865
GO:0090596	sensory organ morphogenesis	biological_process	0.00034714	0.012386	20	677	227	19130	13	ENSOARG00000017420,ENSOARG00000014582,ENSOARG00000016622,ENSOARG00000013317,ENSOARG00000010939,ENSOARG00000009599,ENSOARG00000018039,ENSOARG00000002053,ENSOARG00000004499,ENSOARG00000014822,ENSOARG00000016042,ENSOARG00000021018,ENSOARG00000017875	7	ENSOARG00000013752,ENSOARG00000015118,ENSOARG00000016764,ENSOARG00000008534,ENSOARG00000006034,ENSOARG00000016363,ENSOARG00000011056
GO:0032388	positive regulation of intracellular transport	biological_process	0.00039529	0.013764	20	677	238	19130	16	ENSOARG00000017265,ENSOARG00000001202,ENSOARG00000020050,ENSOARG00000016937,ENSOARG00000017562,ENSOARG00000018510,ENSOARG00000017420,ENSOARG00000015180,ENSOARG00000002699,ENSOARG00000005792,ENSOARG00000020889,ENSOARG00000004208,ENSOARG00000016193,ENSOARG00000015044,ENSOARG00000009800,ENSOARG00000008057	4	ENSOARG00000000322,ENSOARG00000005434,ENSOARG00000017474,ENSOARG00000006526
GO:0014706	striated muscle tissue development	biological_process	0.0018033	0.046473	20	677	263	19130	16	ENSOARG00000001574,ENSOARG00000005365,ENSOARG00000013317,ENSOARG00000019067,ENSOARG00000020233,ENSOARG00000003844,ENSOARG00000019971,ENSOARG00000014623,ENSOARG00000015236,ENSOARG00000001783,ENSOARG00000017214,ENSOARG00000014123,ENSOARG00000010493,ENSOARG00000006614,ENSOARG00000016790,ENSOARG00000011235	4	ENSOARG00000016285,ENSOARG00000002366,ENSOARG00000013752,ENSOARG00000004312
GO:0019882	antigen processing and presentation	biological_process	6.9815e-09	8.2145e-07	19	677	111	19130	18	ENSOARG00000008091,ENSOARG00000007322,ENSOARG00000015646,ENSOARG00000009800,ENSOARG00000016610,ENSOARG00000007252,ENSOARG00000007906,ENSOARG00000020667,ENSOARG00000003782,ENSOARG00000012145,ENSOARG00000008908,ENSOARG00000011939,ENSOARG00000020861,ENSOARG00000000058,ENSOARG00000014069,ENSOARG00000007229,ENSOARG00000009042,ENSOARG00000016257	1	ENSOARG00000017973
[truncated: 292 more rows]
