# Supplementary material for: Comparative transcriptome analysis reveals potentially novel roles of Homeobox genes in adipose deposition in fat-tailed sheep
Source: Sci Rep. 2017 Nov 3;7:14491. doi: 10.1038/s41598-017-14967-9 (PMC5670210; doi:10.1038/s41598-017-14967-9)
Supplement: Supplementary file 6 — Dataset 5 [file 41598_2017_14967_MOESM6_ESM.xlsx]

## Sheet: SATvs.VAT
Supplementary Table S5. Cellular components and molecular function GO terms of DEGs from three comparison groups among different adipose depots.
GO_accession	Description	Term_type	Over_represented_pValue	Corrected_pValue	DEG_item	DEG_list	Bg_item	Bg_list	Up	Up_Gene_names	Down	Down_Gene_names
GO:0044459	plasma membrane part	cellular_component	7.6915e-05	0.0064401	26	179	1203	19130	4	ENSOARG00000020442,ENSOARG00000011075,ENSOARG00000010512,ENSOARG00000009845	22	ENSOARG00000009042,ENSOARG00000004356,ENSOARG00000017562,ENSOARG00000017838,ENSOARG00000015718,ENSOARG00000009250,ENSOARG00000011437,ENSOARG00000009172,ENSOARG00000020249,ENSOARG00000001158,ENSOARG00000020968,ENSOARG00000018139,ENSOARG00000014069,ENSOARG00000009653,ENSOARG00000019197,ENSOARG00000002307,ENSOARG00000001701,ENSOARG00000008893,ENSOARG00000013646,ENSOARG00000008332,ENSOARG00000008984,…
GO:0009986	cell surface	cellular_component	0.00026267	0.017063	14	179	493	19130	1	ENSOARG00000020442	13	ENSOARG00000000994,ENSOARG00000002307,ENSOARG00000015718,ENSOARG00000019197,ENSOARG00000005164,ENSOARG00000017562,ENSOARG00000010462,ENSOARG00000004787,ENSOARG00000000123,ENSOARG00000020249,ENSOARG00000008984,ENSOARG00000008893,ENSOARG00000008332
GO:0009897	external side of plasma membrane	cellular_component	0.00050595	0.029567	8	179	193	19130	0		8	ENSOARG00000020249,ENSOARG00000008984,ENSOARG00000008332,ENSOARG00000008893,ENSOARG00000015718,ENSOARG00000002307,ENSOARG00000017562,ENSOARG00000019197
GO:0001772	immunological synapse	cellular_component	6.9666e-06	0.0008197	5	179	29	19130	0		5	ENSOARG00000001158,ENSOARG00000020968,ENSOARG00000013646,ENSOARG00000004356,ENSOARG00000008984
GO:0042101	T cell receptor complex	cellular_component	3.3649e-06	0.00046498	4	179	12	19130	0		4	ENSOARG00000009172,ENSOARG00000013646,ENSOARG00000004356,ENSOARG00000008984
GO:0019031	viral envelope	cellular_component	6.8554e-05	0.0058768	4	179	24	19130	1	Novel02382	3	ENSOARG00000009174,ENSOARG00000001672,Novel01890
GO:0036338	viral membrane	cellular_component	6.8554e-05	0.0058768	4	179	24	19130	1	Novel02382	3	Novel01890,ENSOARG00000009174,ENSOARG00000001672
GO:0042612	MHC class I protein complex	cellular_component	0.00099243	0.051339	3	179	22	19130	0		3	ENSOARG00000001701,ENSOARG00000009042,ENSOARG00000014069
GO:0042105	alpha-beta T cell receptor complex	cellular_component	0.00045228	0.026871	2	179	4	19130	0		2	ENSOARG00000009172,ENSOARG00000008984
GO:0005488	binding	molecular_function	0.00018025	0.012685	152	179	13962	19130	35	ENSOARG00000012378,ENSOARG00000005770,Novel00685,Novel01101,ENSOARG00000006063,ENSOARG00000006073,ENSOARG00000007533,ENSOARG00000001862,ENSOARG00000011916,ENSOARG00000014195,ENSOARG00000019395,ENSOARG00000009845,ENSOARG00000013062,Novel02382,ENSOARG00000020856,ENSOARG00000017489,ENSOARG00000011683,ENSOARG00000002613,ENSOARG00000019884,ENSOARG00000009090,ENSOARG00000012452,ENSOARG00000012075,ENSOA…	117	ENSOARG00000016334,ENSOARG00000017214,ENSOARG00000006135,ENSOARG00000008893,ENSOARG00000016290,ENSOARG00000010358,ENSOARG00000001589,ENSOARG00000015379,ENSOARG00000009999,ENSOARG00000011967,ENSOARG00000012346,ENSOARG00000009653,ENSOARG00000017398,ENSOARG00000020563,ENSOARG00000001158,ENSOARG00000002790,ENSOARG00000012131,ENSOARG00000003349,ENSOARG00000010445,ENSOARG00000002808,ENSOARG00000015215,…
GO:0005515	protein binding	molecular_function	3.6331e-05	0.0036135	128	179	10794	19130	28	ENSOARG00000018722,ENSOARG00000016951,ENSOARG00000008114,ENSOARG00000014525,ENSOARG00000007493,ENSOARG00000014195,ENSOARG00000020442,ENSOARG00000013062,ENSOARG00000009845,ENSOARG00000017240,ENSOARG00000010512,Novel02382,ENSOARG00000011075,ENSOARG00000020376,ENSOARG00000017994,ENSOARG00000003437,ENSOARG00000020856,ENSOARG00000005770,ENSOARG00000012378,ENSOARG00000011683,ENSOARG00000017489,ENSOARG0…	100	ENSOARG00000006400,ENSOARG00000019971,ENSOARG00000003620,ENSOARG00000011235,ENSOARG00000003586,ENSOARG00000010462,ENSOARG00000020138,ENSOARG00000008861,ENSOARG00000006908,ENSOARG00000006591,ENSOARG00000000123,ENSOARG00000009599,ENSOARG00000010959,ENSOARG00000001680,ENSOARG00000001701,ENSOARG00000008332,ENSOARG00000015970,ENSOARG00000014085,ENSOARG00000004964,ENSOARG00000006139,ENSOARG00000003963,…
GO:0003677	DNA binding	molecular_function	1.5853e-05	0.0017089	33	179	1604	19130	8	ENSOARG00000020376,ENSOARG00000003437,ENSOARG00000002613,ENSOARG00000019395,ENSOARG00000011916,Novel00685,ENSOARG00000018722,ENSOARG00000014525	25	ENSOARG00000012131,ENSOARG00000020422,ENSOARG00000010939,ENSOARG00000007840,ENSOARG00000016306,ENSOARG00000016331,ENSOARG00000014623,ENSOARG00000016319,ENSOARG00000016296,ENSOARG00000009675,ENSOARG00000010493,ENSOARG00000006908,ENSOARG00000013941,ENSOARG00000017214,ENSOARG00000010959,ENSOARG00000009680,ENSOARG00000016334,ENSOARG00000004499,ENSOARG00000011967,ENSOARG00000015379,ENSOARG00000009999,…
GO:0043565	sequence-specific DNA binding	molecular_function	1.0438e-07	3.2433e-05	25	179	795	19130	6	ENSOARG00000019395,ENSOARG00000014525,ENSOARG00000018722,ENSOARG00000002613,ENSOARG00000003437,ENSOARG00000020376	19	ENSOARG00000016319,ENSOARG00000016296,ENSOARG00000009675,ENSOARG00000010493,ENSOARG00000012131,ENSOARG00000010939,ENSOARG00000016306,ENSOARG00000016331,ENSOARG00000004499,ENSOARG00000015379,ENSOARG00000009999,ENSOARG00000011967,ENSOARG00000002740,ENSOARG00000010358,ENSOARG00000009758,ENSOARG00000009680,ENSOARG00000017214,ENSOARG00000013941,ENSOARG00000006908
GO:0001071	nucleic acid binding transcription factor activity	molecular_function	2.3835e-07	5.6459e-05	24	179	773	19130	4	ENSOARG00000003437,Novel00685,ENSOARG00000020376,ENSOARG00000014525	20	ENSOARG00000017214,ENSOARG00000006908,ENSOARG00000013941,ENSOARG00000010358,ENSOARG00000013482,ENSOARG00000009758,ENSOARG00000015379,ENSOARG00000011967,ENSOARG00000009999,ENSOARG00000002740,ENSOARG00000004499,ENSOARG00000014623,ENSOARG00000010939,ENSOARG00000016306,ENSOARG00000007840,ENSOARG00000020422,ENSOARG00000012131,ENSOARG00000010493,ENSOARG00000009675,ENSOARG00000016296
GO:0003700	transcription factor activity, sequence-specific DNA binding	molecular_function	2.3835e-07	5.6459e-05	24	179	773	19130	4	ENSOARG00000003437,ENSOARG00000020376,Novel00685,ENSOARG00000014525	20	ENSOARG00000004499,ENSOARG00000002740,ENSOARG00000015379,ENSOARG00000009999,ENSOARG00000011967,ENSOARG00000010358,ENSOARG00000009758,ENSOARG00000013482,ENSOARG00000017214,ENSOARG00000006908,ENSOARG00000013941,ENSOARG00000016296,ENSOARG00000009675,ENSOARG00000010493,ENSOARG00000020422,ENSOARG00000012131,ENSOARG00000014623,ENSOARG00000010939,ENSOARG00000016306,ENSOARG00000007840
GO:0005102	receptor binding	molecular_function	0.00081958	0.043657	20	179	978	19130	1	Novel02382	19	ENSOARG00000005164,ENSOARG00000002808,ENSOARG00000004964,ENSOARG00000010445,ENSOARG00000010631,ENSOARG00000002790,Novel01918,ENSOARG00000012461,ENSOARG00000014623,ENSOARG00000020249,ENSOARG00000005846,ENSOARG00000004787,ENSOARG00000020138,ENSOARG00000020968,ENSOARG00000003586,ENSOARG00000015723,ENSOARG00000001680,ENSOARG00000000123,ENSOARG00000013941
GO:0046983	protein dimerization activity	molecular_function	0.00098199	0.051092	18	179	843	19130	2	ENSOARG00000003437,ENSOARG00000020376	16	ENSOARG00000010493,ENSOARG00000004964,ENSOARG00000012131,ENSOARG00000020422,ENSOARG00000009172,ENSOARG00000004787,ENSOARG00000007840,ENSOARG00000012461,ENSOARG00000020249,ENSOARG00000014623,ENSOARG00000015379,ENSOARG00000019168,ENSOARG00000008984,ENSOARG00000013941,ENSOARG00000009599,ENSOARG00000017214
GO:0000981	RNA polymerase II transcription factor activity, sequence-specific DNA binding	molecular_function	2.4375e-06	0.00035968	16	179	425	19130	3	ENSOARG00000020376,ENSOARG00000003437,ENSOARG00000014525	13	ENSOARG00000004499,ENSOARG00000011967,ENSOARG00000015379,ENSOARG00000010358,ENSOARG00000009675,ENSOARG00000010493,ENSOARG00000020422,ENSOARG00000012131,ENSOARG00000014623,ENSOARG00000017214,ENSOARG00000007840,ENSOARG00000010939,ENSOARG00000013941
GO:0044212	transcription regulatory region DNA binding	molecular_function	5.6139e-05	0.0051827	16	179	542	19130	3	ENSOARG00000018722,ENSOARG00000003437,ENSOARG00000020376	13	ENSOARG00000011967,ENSOARG00000015379,ENSOARG00000009999,ENSOARG00000004499,ENSOARG00000010493,ENSOARG00000009675,ENSOARG00000010358,ENSOARG00000012131,ENSOARG00000020422,ENSOARG00000010939,ENSOARG00000007840,ENSOARG00000013941,ENSOARG00000014623
GO:0000975	regulatory region DNA binding	molecular_function	6.3723e-05	0.0056233	16	179	548	19130	3	ENSOARG00000020376,ENSOARG00000003437,ENSOARG00000018722	13	ENSOARG00000012131,ENSOARG00000020422,ENSOARG00000007840,ENSOARG00000013941,ENSOARG00000010939,ENSOARG00000014623,ENSOARG00000015379,ENSOARG00000011967,ENSOARG00000009999,ENSOARG00000004499,ENSOARG00000010493,ENSOARG00000009675,ENSOARG00000010358
GO:0001067	regulatory region nucleic acid binding	molecular_function	6.3723e-05	0.0056233	16	179	548	19130	3	ENSOARG00000020376,ENSOARG00000003437,ENSOARG00000018722	13	ENSOARG00000012131,ENSOARG00000020422,ENSOARG00000013941,ENSOARG00000007840,ENSOARG00000010939,ENSOARG00000014623,ENSOARG00000015379,ENSOARG00000009999,ENSOARG00000011967,ENSOARG00000004499,ENSOARG00000010493,ENSOARG00000010358,ENSOARG00000009675
GO:0000982	transcription factor activity, RNA polymerase II core promoter proximal region sequence-specific binding	molecular_function	7.6807e-07	0.00013556	13	179	254	19130	2	ENSOARG00000020376,ENSOARG00000003437	11	ENSOARG00000020422,ENSOARG00000013941,ENSOARG00000007840,ENSOARG00000010939,ENSOARG00000014623,ENSOARG00000017214,ENSOARG00000004499,ENSOARG00000011967,ENSOARG00000009675,ENSOARG00000010358,ENSOARG00000010493
GO:0000976	transcription regulatory region sequence-specific DNA binding	molecular_function	0.00080315	0.043371	12	179	432	19130	2	ENSOARG00000020376,ENSOARG00000003437	10	ENSOARG00000010493,ENSOARG00000010358,ENSOARG00000009675,ENSOARG00000015379,ENSOARG00000009999,ENSOARG00000011967,ENSOARG00000004499,ENSOARG00000013941,ENSOARG00000010939,ENSOARG00000012131
GO:0001228	transcriptional activator activity, RNA polymerase II transcription regulatory region sequence-specific binding	molecular_function	0.00012471	0.0094845	10	179	251	19130			10	ENSOARG00000013941,ENSOARG00000010939,ENSOARG00000017214,ENSOARG00000014623,ENSOARG00000012131,ENSOARG00000009675,ENSOARG00000010358,ENSOARG00000011967,ENSOARG00000015379,ENSOARG00000004499
GO:0001077	transcriptional activator activity, RNA polymerase II core promoter proximal region sequence-specific binding	molecular_function	0.00024273	0.016064	8	179	176	19130			8	ENSOARG00000004499,ENSOARG00000011967,ENSOARG00000010358,ENSOARG00000009675,ENSOARG00000013941,ENSOARG00000010939,ENSOARG00000014623,ENSOARG00000017214
GO:0004896	cytokine receptor activity	molecular_function	2.2776e-06	0.00033886	7	179	65	19130	1	ENSOARG00000009845	6	ENSOARG00000018894,ENSOARG00000016109,ENSOARG00000010462,ENSOARG00000010445,ENSOARG00000019197,ENSOARG00000017562
GO:0001078	transcriptional repressor activity, RNA polymerase II core promoter proximal region sequence-specific binding	molecular_function	1.3469e-05	0.0014876	7	179	84	19130	2	ENSOARG00000003437,ENSOARG00000020376	5	ENSOARG00000014623,ENSOARG00000010493,ENSOARG00000013941,ENSOARG00000007840,ENSOARG00000020422
GO:0001227	transcriptional repressor activity, RNA polymerase II transcription regulatory region sequence-specific binding	molecular_function	0.00021349	0.014557	7	179	129	19130	2	ENSOARG00000020376,ENSOARG00000003437	5	ENSOARG00000020422,ENSOARG00000007840,ENSOARG00000013941,ENSOARG00000010493,ENSOARG00000014623
GO:0042826	histone deacetylase binding	molecular_function	0.00049357	0.029132	5	179	68	19130	1	ENSOARG00000018722	4	ENSOARG00000009675,ENSOARG00000014623,ENSOARG00000011235,ENSOARG00000020422
GO:0042605	peptide antigen binding	molecular_function	5.9519e-05	0.0054114	4	179	24	19130	1	ENSOARG00000007493	3	ENSOARG00000014069,ENSOARG00000001701,ENSOARG00000009042
GO:0035591	signaling adaptor activity	molecular_function	0.00012141	0.0093007	4	179	28	19130			4	ENSOARG00000001158,ENSOARG00000010631,ENSOARG00000015970,ENSOARG00000014085
GO:0004715	non-membrane spanning protein tyrosine kinase activity	molecular_function	0.00042847	0.025704	4	179	37	19130			4	ENSOARG00000014631,ENSOARG00000013646,ENSOARG00000015215,ENSOARG00000020968
GO:0003823	antigen binding	molecular_function	0.00057122	0.032542	4	179	42	19130	1	ENSOARG00000007493	3	ENSOARG00000009042,ENSOARG00000001701,ENSOARG00000014069
GO:0005070	SH3/SH2 adaptor activity	molecular_function	0.00019625	0.013641	3	179	13	19130			3	ENSOARG00000001158,ENSOARG00000014085,ENSOARG00000015970
GO:0043425	bHLH transcription factor binding	molecular_function	0.00067038	0.037297	3	179	19	19130			3	ENSOARG00000007840,ENSOARG00000010358,ENSOARG00000014623
GO:0048495	Roundabout binding	molecular_function	0.00058631	0.033296	2	179	4	19130			2	ENSOARG00000004787,ENSOARG00000002790

## Sheet: SATvs.TAT
GO_accession	Description	Term_type	Over_represented_pValue	Corrected_pValue	DEG_item	DEG_list	Bg_item	Bg_list	Up	Up_Gene_names	Down	Down_Gene_names
GO:0005576	extracellular region	cellular_component	1.0693e-05	0.0064163	72	269	3171	19130	55	ENSOARG00000010448,ENSOARG00000020112,ENSOARG00000015936,ENSOARG00000007864,ENSOARG00000013402,ENSOARG00000018445,ENSOARG00000001878,ENSOARG00000017807,ENSOARG00000007525,ENSOARG00000018337,ENSOARG00000009627,ENSOARG00000011939,ENSOARG00000008878,ENSOARG00000014330,ENSOARG00000017397,ENSOARG00000016133,ENSOARG00000008550,ENSOARG00000015582,ENSOARG00000011846,ENSOARG00000015646,ENSOARG00000025180,…	17	ENSOARG00000012584,ENSOARG00000006455,ENSOARG00000000417,ENSOARG00000013634,ENSOARG00000001516,ENSOARG00000011019,ENSOARG00000013752,ENSOARG00000019756,Novel01381,ENSOARG00000011320,ENSOARG00000006378,ENSOARG00000014590,ENSOARG00000019031,ENSOARG00000013193,ENSOARG00000020262,ENSOARG00000016764,ENSOARG00000003435
GO:0044421	extracellular region part	cellular_component	1.3668e-05	0.0074562	66	269	2799	19130	51	ENSOARG00000020788,ENSOARG00000020761,ENSOARG00000018871,ENSOARG00000020838,ENSOARG00000009301,ENSOARG00000016153,ENSOARG00000005972,ENSOARG00000002053,ENSOARG00000004497,ENSOARG00000002722,ENSOARG00000020861,ENSOARG00000001568,ENSOARG00000005236,ENSOARG00000009000,ENSOARG00000012417,ENSOARG00000010615,ENSOARG00000007977,ENSOARG00000003028,ENSOARG00000001755,ENSOARG00000008001,ENSOARG00000004721,…	15	ENSOARG00000013193,ENSOARG00000000417,ENSOARG00000006455,ENSOARG00000019031,ENSOARG00000014590,ENSOARG00000012584,ENSOARG00000011320,ENSOARG00000003435,ENSOARG00000016764,ENSOARG00000019756,ENSOARG00000020262,ENSOARG00000013752,ENSOARG00000011019,ENSOARG00000001516,ENSOARG00000013634
GO:0005615	extracellular space	cellular_component	3.6506e-07	0.0013736	31	269	812	19130	24	ENSOARG00000007525,ENSOARG00000017807,ENSOARG00000001878,ENSOARG00000005972,ENSOARG00000018445,ENSOARG00000002053,ENSOARG00000007864,ENSOARG00000002722,ENSOARG00000020861,ENSOARG00000001568,ENSOARG00000009000,ENSOARG00000007977,ENSOARG00000010448,ENSOARG00000025180,ENSOARG00000001755,ENSOARG00000005322,ENSOARG00000004721,ENSOARG00000021090,ENSOARG00000012515,ENSOARG00000008550,ENSOARG00000009627,…	7	ENSOARG00000011019,ENSOARG00000006455,ENSOARG00000013752,ENSOARG00000000417,ENSOARG00000003435,ENSOARG00000016764,ENSOARG00000012584
GO:0043565	sequence-specific DNA binding	molecular_function	3.4917e-07	0.0013736	31	269	795	19130	11	ENSOARG00000002613,ENSOARG00000019591,ENSOARG00000016271,ENSOARG00000003437,ENSOARG00000005581,ENSOARG00000009234,ENSOARG00000006614,ENSOARG00000010418,ENSOARG00000009957,ENSOARG00000009830,ENSOARG00000007034	20	ENSOARG00000019817,ENSOARG00000020262,ENSOARG00000012314,ENSOARG00000016319,ENSOARG00000009758,Novel01871,ENSOARG00000005434,ENSOARG00000016342,ENSOARG00000011967,ENSOARG00000021060,ENSOARG00000009680,ENSOARG00000006626,ENSOARG00000001487,ENSOARG00000002740,ENSOARG00000012375,ENSOARG00000009675,ENSOARG00000016331,ENSOARG00000016363,ENSOARG00000017964,ENSOARG00000016352

## Sheet: VATvs.TAT
GO_accession	Description	Term_type	Over_represented_pValue	Corrected_pValue	DEG_item	DEG_list	Bg_item	Bg_list	Up	Up_Gene_names	Down	Down_Gene_names
GO:0016020	membrane	cellular_component	1.9527e-05	0.0011267	292	677	6655	19130	242	ENSOARG00000005792,ENSOARG00000002223,ENSOARG00000014236,ENSOARG00000020741,ENSOARG00000016042,ENSOARG00000009000,ENSOARG00000000158,ENSOARG00000020622,ENSOARG00000021000,ENSOARG00000013918,ENSOARG00000014361,ENSOARG00000003994,Novel00399,ENSOARG00000003059,Novel01889,ENSOARG00000012392,ENSOARG00000011217,ENSOARG00000008057,ENSOARG00000015703,ENSOARG00000007944,ENSOARG00000000058,ENSOARG000000172…	50	ENSOARG00000011865,ENSOARG00000012178,ENSOARG00000016870,ENSOARG00000002554,ENSOARG00000000033,ENSOARG00000000322,ENSOARG00000014789,ENSOARG00000014433,Novel02431,ENSOARG00000004250,ENSOARG00000018650,ENSOARG00000019145,ENSOARG00000001516,ENSOARG00000013022,ENSOARG00000014939,ENSOARG00000014425,ENSOARG00000006034,ENSOARG00000001264,ENSOARG00000015250,ENSOARG00000017168,ENSOARG00000001159,ENSOARG0…
GO:0044425	membrane part	cellular_component	8.2023e-05	0.0037764	195	677	4290	19130	164	ENSOARG00000005117,ENSOARG00000018260,ENSOARG00000009042,ENSOARG00000014069,ENSOARG00000006979,ENSOARG00000008878,ENSOARG00000006358,ENSOARG00000021147,ENSOARG00000000890,ENSOARG00000008332,ENSOARG00000018528,ENSOARG00000013669,ENSOARG00000018189,ENSOARG00000016610,ENSOARG00000011738,ENSOARG00000019963,ENSOARG00000020667,ENSOARG00000016937,ENSOARG00000006760,ENSOARG00000003782,ENSOARG00000015172,…	31	ENSOARG00000011352,ENSOARG00000011865,ENSOARG00000006526,ENSOARG00000016870,ENSOARG00000002554,ENSOARG00000000033,ENSOARG00000009194,ENSOARG00000014789,ENSOARG00000020287,Novel02431,ENSOARG00000017973,ENSOARG00000006817,ENSOARG00000004088,ENSOARG00000014433,ENSOARG00000004250,ENSOARG00000018650,ENSOARG00000020665,ENSOARG00000013022,ENSOARG00000014939,ENSOARG00000001264,ENSOARG00000014425,ENSOARG0…
GO:0005576	extracellular region	cellular_component	1.897e-12	4.8785e-10	181	677	3171	19130	143	Novel02027,ENSOARG00000001574,ENSOARG00000003099,ENSOARG00000010462,ENSOARG00000020215,ENSOARG00000021090,ENSOARG00000007656,ENSOARG00000005236,ENSOARG00000013157,ENSOARG00000001968,ENSOARG00000013367,ENSOARG00000012515,ENSOARG00000007991,ENSOARG00000017513,ENSOARG00000015727,ENSOARG00000015592,ENSOARG00000011944,ENSOARG00000009972,ENSOARG00000015646,ENSOARG00000014898,ENSOARG00000009779,ENSOARG0…	38	ENSOARG00000012490,ENSOARG00000000417,ENSOARG00000012178,ENSOARG00000013959,ENSOARG00000014824,Novel02176,ENSOARG00000018980,ENSOARG00000010184,ENSOARG00000011019,ENSOARG00000014590,ENSOARG00000001516,ENSOARG00000013752,ENSOARG00000019145,ENSOARG00000016764,Novel01912,ENSOARG00000014723,ENSOARG00000014425,ENSOARG00000004871,ENSOARG00000020519,ENSOARG00000017168,ENSOARG00000016103,ENSOARG000000169…
GO:0071944	cell periphery	cellular_component	9.483e-11	1.5662e-08	163	677	2753	19130	143	ENSOARG00000005117,ENSOARG00000003112,ENSOARG00000008526,ENSOARG00000014762,ENSOARG00000014069,ENSOARG00000007774,ENSOARG00000009042,ENSOARG00000009551,ENSOARG00000006979,ENSOARG00000008507,ENSOARG00000006358,ENSOARG00000021147,ENSOARG00000018528,ENSOARG00000008332,ENSOARG00000015970,ENSOARG00000001497,ENSOARG00000016610,ENSOARG00000020667,ENSOARG00000019963,ENSOARG00000011738,ENSOARG00000006760,…	20	ENSOARG00000011865,ENSOARG00000006526,ENSOARG00000011352,ENSOARG00000002554,ENSOARG00000020287,ENSOARG00000014433,ENSOARG00000017973,Novel00471,ENSOARG00000018650,ENSOARG00000014939,ENSOARG00000006034,ENSOARG00000017168,ENSOARG00000016771,ENSOARG00000001159,ENSOARG00000017474,ENSOARG00000016766,ENSOARG00000013018,ENSOARG00000004502,ENSOARG00000006117,ENSOARG00000020186
GO:0044421	extracellular region part	cellular_component	1.7377e-10	2.7931e-08	160	677	2799	19130	130	ENSOARG00000004721,ENSOARG00000013509,ENSOARG00000016888,ENSOARG00000008893,ENSOARG00000011842,ENSOARG00000010344,ENSOARG00000002263,ENSOARG00000012461,ENSOARG00000010448,ENSOARG00000009914,ENSOARG00000002053,ENSOARG00000016047,ENSOARG00000016133,ENSOARG00000002699,ENSOARG00000017560,ENSOARG00000008249,ENSOARG00000009058,ENSOARG00000014188,ENSOARG00000003130,ENSOARG00000009301,ENSOARG00000020761,…	30	ENSOARG00000019031,ENSOARG00000016951,ENSOARG00000004502,ENSOARG00000016103,ENSOARG00000006212,ENSOARG00000013193,ENSOARG00000017474,ENSOARG00000004871,ENSOARG00000000450,ENSOARG00000020519,ENSOARG00000018548,ENSOARG00000017168,ENSOARG00000016764,ENSOARG00000016285,ENSOARG00000014425,ENSOARG00000001516,ENSOARG00000013752,ENSOARG00000019145,ENSOARG00000014590,ENSOARG00000011019,ENSOARG00000008361,…
GO:0005886	plasma membrane	cellular_component	4.4855e-10	6.5648e-08	156	677	2653	19130	137	ENSOARG00000019218,ENSOARG00000016047,ENSOARG00000010448,ENSOARG00000014463,ENSOARG00000017465,ENSOARG00000007864,ENSOARG00000016867,ENSOARG00000006301,ENSOARG00000015037,ENSOARG00000017562,ENSOARG00000020761,ENSOARG00000012180,ENSOARG00000004484,ENSOARG00000014188,ENSOARG00000008262,ENSOARG00000009250,ENSOARG00000017199,ENSOARG00000007395,ENSOARG00000000405,ENSOARG00000008893,ENSOARG00000009130,…	19	ENSOARG00000017474,ENSOARG00000013018,ENSOARG00000016766,ENSOARG00000004502,ENSOARG00000006117,ENSOARG00000020186,ENSOARG00000006034,ENSOARG00000017168,ENSOARG00000016771,ENSOARG00000001159,ENSOARG00000018650,ENSOARG00000014939,ENSOARG00000011865,ENSOARG00000006526,ENSOARG00000011352,ENSOARG00000002554,ENSOARG00000020287,ENSOARG00000017973,ENSOARG00000014433
GO:0031982	vesicle	cellular_component	2.9926e-07	2.777e-05	139	677	2595	19130	112	ENSOARG00000011380,ENSOARG00000009058,ENSOARG00000015144,ENSOARG00000017560,ENSOARG00000016867,ENSOARG00000007864,ENSOARG00000017465,ENSOARG00000012145,ENSOARG00000016754,ENSOARG00000020761,ENSOARG00000000344,ENSOARG00000016642,ENSOARG00000003130,ENSOARG00000017807,ENSOARG00000009301,ENSOARG00000001170,ENSOARG00000016857,ENSOARG00000020968,ENSOARG00000002960,ENSOARG00000021018,ENSOARG00000008349,…	27	ENSOARG00000001516,ENSOARG00000019145,ENSOARG00000014590,ENSOARG00000013634,ENSOARG00000008361,ENSOARG00000011019,ENSOARG00000018980,ENSOARG00000010184,ENSOARG00000017973,ENSOARG00000014824,ENSOARG00000011865,ENSOARG00000000417,ENSOARG00000013959,ENSOARG00000012490,ENSOARG00000015118,ENSOARG00000001444,ENSOARG00000017474,ENSOARG00000013193,ENSOARG00000006212,ENSOARG00000016103,ENSOARG00000016951,…
GO:0031988	membrane-bounded vesicle	cellular_component	1.6444e-07	1.561e-05	136	677	2503	19130	110	ENSOARG00000003604,ENSOARG00000012367,ENSOARG00000008001,ENSOARG00000006139,ENSOARG00000003028,ENSOARG00000020657,ENSOARG00000012461,ENSOARG00000008473,ENSOARG00000009599,ENSOARG00000000950,ENSOARG00000011146,ENSOARG00000011768,ENSOARG00000016790,ENSOARG00000017631,ENSOARG00000005846,ENSOARG00000011842,ENSOARG00000008893,ENSOARG00000016888,ENSOARG00000020214,ENSOARG00000013509,ENSOARG00000015144,…	26	ENSOARG00000006212,ENSOARG00000013193,ENSOARG00000017474,ENSOARG00000019031,ENSOARG00000004502,ENSOARG00000016951,ENSOARG00000016103,ENSOARG00000015118,ENSOARG00000001444,ENSOARG00000018548,ENSOARG00000017168,ENSOARG00000020519,ENSOARG00000000450,ENSOARG00000008361,ENSOARG00000013634,ENSOARG00000011019,ENSOARG00000001516,ENSOARG00000019145,ENSOARG00000014590,ENSOARG00000000417,ENSOARG00000013959,…
GO:0070062	extracellular exosome	cellular_component	7.2562e-08	7.5072e-06	122	677	2151	19130	98	ENSOARG00000003604,ENSOARG00000012367,ENSOARG00000008001,ENSOARG00000003028,ENSOARG00000012461,ENSOARG00000008473,ENSOARG00000009599,ENSOARG00000000950,ENSOARG00000011146,ENSOARG00000011768,ENSOARG00000016790,ENSOARG00000017631,ENSOARG00000005846,ENSOARG00000011842,ENSOARG00000008893,ENSOARG00000016888,ENSOARG00000020214,ENSOARG00000013509,ENSOARG00000015144,ENSOARG00000009058,ENSOARG00000017560,…	24	ENSOARG00000012490,ENSOARG00000014824,ENSOARG00000000417,ENSOARG00000013959,ENSOARG00000017973,ENSOARG00000010184,ENSOARG00000018980,ENSOARG00000011019,ENSOARG00000013634,ENSOARG00000008361,ENSOARG00000014590,ENSOARG00000001516,ENSOARG00000019145,ENSOARG00000020519,ENSOARG00000000450,ENSOARG00000017168,ENSOARG00000018548,ENSOARG00000016951,ENSOARG00000004502,ENSOARG00000016103,ENSOARG00000019031,…
GO:0065010	extracellular membrane-bounded organelle	cellular_component	7.4187e-08	7.6316e-06	122	677	2152	19130	98	ENSOARG00000000344,ENSOARG00000020761,ENSOARG00000016754,ENSOARG00000003130,ENSOARG00000016642,ENSOARG00000017807,ENSOARG00000009301,ENSOARG00000016867,ENSOARG00000012145,ENSOARG00000007864,ENSOARG00000009058,ENSOARG00000015144,ENSOARG00000017560,ENSOARG00000001254,ENSOARG00000002053,ENSOARG00000008208,ENSOARG00000016047,ENSOARG00000004015,ENSOARG00000020112,ENSOARG00000020889,ENSOARG00000006538,…	24	ENSOARG00000020519,ENSOARG00000000450,ENSOARG00000018548,ENSOARG00000017168,ENSOARG00000019031,ENSOARG00000016951,ENSOARG00000016103,ENSOARG00000004502,ENSOARG00000006212,ENSOARG00000017474,ENSOARG00000013193,ENSOARG00000017973,ENSOARG00000018980,ENSOARG00000010184,ENSOARG00000012490,ENSOARG00000013959,ENSOARG00000000417,ENSOARG00000014824,ENSOARG00000014590,ENSOARG00000001516,ENSOARG00000019145,…
GO:1903561	extracellular vesicle	cellular_component	1.0025e-07	1.0082e-05	122	677	2163	19130	98	ENSOARG00000007977,ENSOARG00000020622,ENSOARG00000002223,ENSOARG00000016042,ENSOARG00000009000,ENSOARG00000020741,ENSOARG00000003994,ENSOARG00000001660,ENSOARG00000014123,ENSOARG00000017875,ENSOARG00000014361,ENSOARG00000005151,ENSOARG00000013374,ENSOARG00000014042,ENSOARG00000011217,ENSOARG00000018210,ENSOARG00000011939,ENSOARG00000019463,ENSOARG00000025180,ENSOARG00000000155,ENSOARG00000003782,…	24	ENSOARG00000019145,ENSOARG00000001516,ENSOARG00000014590,ENSOARG00000013634,ENSOARG00000008361,ENSOARG00000011019,ENSOARG00000018980,ENSOARG00000010184,ENSOARG00000017973,ENSOARG00000000417,ENSOARG00000013959,ENSOARG00000014824,ENSOARG00000012490,ENSOARG00000006212,ENSOARG00000017474,ENSOARG00000013193,ENSOARG00000019031,ENSOARG00000016951,ENSOARG00000016103,ENSOARG00000004502,ENSOARG00000018548,…
GO:0043230	extracellular organelle	cellular_component	1.0246e-07	1.0247e-05	122	677	2164	19130	98	ENSOARG00000007525,ENSOARG00000005006,ENSOARG00000014582,ENSOARG00000011756,ENSOARG00000008285,ENSOARG00000007229,ENSOARG00000005443,ENSOARG00000011939,ENSOARG00000003782,ENSOARG00000019463,ENSOARG00000025180,ENSOARG00000000155,ENSOARG00000011217,ENSOARG00000014042,ENSOARG00000018210,ENSOARG00000002223,ENSOARG00000016042,ENSOARG00000020741,ENSOARG00000009000,ENSOARG00000007977,ENSOARG00000020622,…	24	ENSOARG00000006212,ENSOARG00000013193,ENSOARG00000017474,ENSOARG00000019031,ENSOARG00000016951,ENSOARG00000016103,ENSOARG00000004502,ENSOARG00000018548,ENSOARG00000017168,ENSOARG00000000450,ENSOARG00000020519,ENSOARG00000014590,ENSOARG00000001516,ENSOARG00000019145,ENSOARG00000008361,ENSOARG00000013634,ENSOARG00000011019,ENSOARG00000018980,ENSOARG00000010184,ENSOARG00000017973,ENSOARG00000000417,…
GO:0044459	plasma membrane part	cellular_component	4.5328e-14	1.4571e-11	99	677	1203	19130	88	ENSOARG00000000058,ENSOARG00000009653,ENSOARG00000007932,ENSOARG00000003782,ENSOARG00000016937,ENSOARG00000019463,ENSOARG00000006760,ENSOARG00000025180,ENSOARG00000020233,ENSOARG00000002094,ENSOARG00000014582,ENSOARG00000008285,ENSOARG00000007229,ENSOARG00000002223,ENSOARG00000016042,ENSOARG00000009000,ENSOARG00000005792,ENSOARG00000021000,ENSOARG00000020622,ENSOARG00000013918,ENSOARG00000007906,…	11	ENSOARG00000001159,ENSOARG00000017973,ENSOARG00000020287,ENSOARG00000002554,ENSOARG00000011865,ENSOARG00000006526,ENSOARG00000014939,ENSOARG00000018650,ENSOARG00000017474,ENSOARG00000016766,ENSOARG00000013018
GO:0009986	cell surface	cellular_component	5.0542e-20	3.4994e-17	66	677	493	19130	64	ENSOARG00000014214,ENSOARG00000011380,ENSOARG00000014188,ENSOARG00000002307,ENSOARG00000015144,ENSOARG00000016867,ENSOARG00000006301,ENSOARG00000017465,ENSOARG00000016642,ENSOARG00000003130,ENSOARG00000017562,ENSOARG00000006538,ENSOARG00000015718,ENSOARG00000008208,ENSOARG00000016047,ENSOARG00000020112,ENSOARG00000008984,ENSOARG00000016138,ENSOARG00000012367,ENSOARG00000020747,ENSOARG00000000123,…	2	ENSOARG00000011352,ENSOARG00000014433
GO:0005615	extracellular space	cellular_component	9.1955e-11	1.5328e-08	66	677	812	19130	54	ENSOARG00000014582,ENSOARG00000005006,ENSOARG00000002307,ENSOARG00000015144,ENSOARG00000007525,ENSOARG00000017560,ENSOARG00000018510,ENSOARG00000006813,ENSOARG00000014188,ENSOARG00000001568,ENSOARG00000017807,ENSOARG00000003130,ENSOARG00000025180,ENSOARG00000007864,ENSOARG00000003782,ENSOARG00000018445,ENSOARG00000010448,ENSOARG00000001170,ENSOARG00000018039,ENSOARG00000012064,ENSOARG00000001254,…	12	ENSOARG00000020519,ENSOARG00000004871,ENSOARG00000000450,ENSOARG00000017973,ENSOARG00000013959,ENSOARG00000000417,ENSOARG00000014425,ENSOARG00000016285,ENSOARG00000016764,ENSOARG00000013752,ENSOARG00000019145,ENSOARG00000011019
GO:0098552	side of membrane	cellular_component	7.3933e-17	3.1689e-14	44	677	276	19130	44	ENSOARG00000025180,ENSOARG00000006301,ENSOARG00000016867,ENSOARG00000003782,ENSOARG00000017465,ENSOARG00000009653,ENSOARG00000017562,ENSOARG00000000058,ENSOARG00000014214,ENSOARG00000007229,ENSOARG00000008285,ENSOARG00000014582,ENSOARG00000020233,ENSOARG00000002307,ENSOARG00000015144,ENSOARG00000013918,ENSOARG00000015718,ENSOARG00000016047,ENSOARG00000021000,ENSOARG00000008208,ENSOARG00000005792,…	0
GO:0009897	external side of plasma membrane	cellular_component	3.4882e-20	2.5118e-17	41	677	193	19130	41	ENSOARG00000021005,ENSOARG00000001060,ENSOARG00000009009,ENSOARG00000011738,ENSOARG00000019197,ENSOARG00000020667,ENSOARG00000015044,ENSOARG00000013509,ENSOARG00000020734,ENSOARG00000008332,ENSOARG00000009130,ENSOARG00000011239,ENSOARG00000008893,ENSOARG00000008984,ENSOARG00000016138,ENSOARG00000020249,ENSOARG00000020747,ENSOARG00000009800,ENSOARG00000016047,ENSOARG00000015718,ENSOARG00000008208,…	0
GO:0098797	plasma membrane protein complex	cellular_component	5.5365e-06	0.00038041	33	677	382	19130	30	ENSOARG00000019963,ENSOARG00000007906,ENSOARG00000016610,ENSOARG00000009256,ENSOARG00000015044,ENSOARG00000009800,ENSOARG00000015646,ENSOARG00000009000,ENSOARG00000009172,ENSOARG00000020622,ENSOARG00000016922,ENSOARG00000016047,ENSOARG00000008091,ENSOARG00000013918,ENSOARG00000009130,ENSOARG00000012367,ENSOARG00000013646,ENSOARG00000008285,ENSOARG00000008984,ENSOARG00000016257,ENSOARG00000009250,…	3	ENSOARG00000017474,ENSOARG00000018650,ENSOARG00000017973
GO:0031012	extracellular matrix	cellular_component	8.3929e-07	7.1606e-05	31	677	305	19130	28	ENSOARG00000012461,ENSOARG00000007656,ENSOARG00000002808,ENSOARG00000009686,ENSOARG00000018510,ENSOARG00000008249,ENSOARG00000005006,ENSOARG00000019067,ENSOARG00000013298,ENSOARG00000010344,ENSOARG00000008507,ENSOARG00000017875,ENSOARG00000004368,ENSOARG00000001660,ENSOARG00000021018,ENSOARG00000005151,ENSOARG00000009973,ENSOARG00000002053,ENSOARG00000001254,ENSOARG00000014898,ENSOARG00000018210,…	3	ENSOARG00000001159,ENSOARG00000004871,ENSOARG00000012178
GO:0043235	receptor complex	cellular_component	3.9916e-07	3.6291e-05	27	677	232	19130	23	ENSOARG00000009250,ENSOARG00000007229,ENSOARG00000008285,ENSOARG00000008984,ENSOARG00000012180,ENSOARG00000012367,ENSOARG00000013646,ENSOARG00000025180,ENSOARG00000016867,ENSOARG00000016642,ENSOARG00000009256,ENSOARG00000015044,ENSOARG00000001094,ENSOARG00000010448,ENSOARG00000009130,ENSOARG00000013918,ENSOARG00000020622,ENSOARG00000008208,ENSOARG00000016047,ENSOARG00000005792,ENSOARG00000009172,…	4	ENSOARG00000011865,ENSOARG00000018650,ENSOARG00000002366,ENSOARG00000014433
GO:0005578	proteinaceous extracellular matrix	cellular_component	5.6059e-06	0.00038372	24	677	219	19130	22	ENSOARG00000014898,ENSOARG00000001254,ENSOARG00000001660,ENSOARG00000005151,ENSOARG00000021018,ENSOARG00000014330,ENSOARG00000016790,ENSOARG00000020475,ENSOARG00000013157,ENSOARG00000001968,ENSOARG00000018210,ENSOARG00000015727,ENSOARG00000009686,ENSOARG00000002808,ENSOARG00000007656,ENSOARG00000013298,ENSOARG00000019067,ENSOARG00000010344,ENSOARG00000008507,ENSOARG00000008249,ENSOARG00000005006,…	2	ENSOARG00000012178,ENSOARG00000004871
GO:0098802	plasma membrane receptor complex	cellular_component	0.00012185	0.0051733	15	677	127	19130	14	ENSOARG00000012367,ENSOARG00000013646,ENSOARG00000009250,ENSOARG00000009256,ENSOARG00000008285,ENSOARG00000015044,ENSOARG00000008984,ENSOARG00000020622,ENSOARG00000009172,ENSOARG00000016642,ENSOARG00000009000,ENSOARG00000016867,ENSOARG00000009130,ENSOARG00000013918	1	ENSOARG00000018650
GO:0044420	extracellular matrix component	cellular_component	8.6703e-05	0.0039515	13	677	91	19130	12	ENSOARG00000014898,ENSOARG00000001254,ENSOARG00000012461,ENSOARG00000005151,ENSOARG00000021018,ENSOARG00000010344,ENSOARG00000001968,ENSOARG00000013157,ENSOARG00000020475,ENSOARG00000015727,ENSOARG00000018210,ENSOARG00000018510	1	ENSOARG00000004871
GO:0042611	MHC protein complex	cellular_component	7.5091e-08	7.6806e-06	11	677	41	19130	10	ENSOARG00000007906,ENSOARG00000014069,ENSOARG00000009042,ENSOARG00000007229,ENSOARG00000016610,ENSOARG00000016257,ENSOARG00000015646,ENSOARG00000000058,ENSOARG00000003782,ENSOARG00000008091	1	ENSOARG00000017973
GO:0005581	collagen trimer	cellular_component	0.0019297	0.048928	8	677	58	19130	7	ENSOARG00000017875,ENSOARG00000015727,ENSOARG00000001254,ENSOARG00000007977,ENSOARG00000008001,ENSOARG00000007991,ENSOARG00000009301	1	ENSOARG00000004871
GO:0001772	immunological synapse	cellular_component	5.1898e-05	0.0026024	7	677	29	19130	7	ENSOARG00000013646,ENSOARG00000000571,ENSOARG00000020968,ENSOARG00000003604,ENSOARG00000001158,ENSOARG00000019463,ENSOARG00000008984	0
GO:0008305	integrin complex	cellular_component	0.00015413	0.0062917	7	677	29	19130	7	ENSOARG00000012367,ENSOARG00000009000,ENSOARG00000016642,ENSOARG00000009250,ENSOARG00000009130,ENSOARG00000016867,ENSOARG00000008285	0
GO:0098636	protein complex involved in cell adhesion	cellular_component	0.00015413	0.0062917	7	677	29	19130	7	ENSOARG00000008285,ENSOARG00000009130,ENSOARG00000016867,ENSOARG00000009250,ENSOARG00000009000,ENSOARG00000016642,ENSOARG00000012367	0
GO:0042613	MHC class II protein complex	cellular_component	3.1688e-05	0.0017079	6	677	19	19130	6	ENSOARG00000007229,ENSOARG00000016610,ENSOARG00000016257,ENSOARG00000008091,ENSOARG00000007906,ENSOARG00000000058	0
GO:0042612	MHC class I protein complex	cellular_component	0.00062833	0.020055	5	677	22	19130	4	ENSOARG00000015646,ENSOARG00000003782,ENSOARG00000014069,ENSOARG00000009042	1	ENSOARG00000017973
GO:0043205	fibril	cellular_component	0.00027072	0.0099459	4	677	9	19130	4	ENSOARG00000021018,ENSOARG00000018510,ENSOARG00000001968,ENSOARG00000010344	0
GO:0042101	T cell receptor complex	cellular_component	0.00050482	0.016736	4	677	12	19130	4	ENSOARG00000013646,ENSOARG00000009172,ENSOARG00000009256,ENSOARG00000008984	0
GO:0042105	alpha-beta T cell receptor complex	cellular_component	5.3435e-05	0.002651	3	677	4	19130	3	ENSOARG00000009172,ENSOARG00000008984,ENSOARG00000009256	0
GO:0001527	microfibril	cellular_component	0.000717	0.02214	3	677	5	19130	3	ENSOARG00000021018,ENSOARG00000001968,ENSOARG00000010344	0
GO:0034669	integrin alpha4-beta7 complex	cellular_component	0.0017114	0.044714	2	677	2	19130	2	ENSOARG00000016867,ENSOARG00000016642	0
GO:0005488	binding	molecular_function	3.3086e-09	4.1362e-07	566	677	13962	19130	446	ENSOARG00000006538,ENSOARG00000008349,ENSOARG00000002960,ENSOARG00000021018,ENSOARG00000017877,ENSOARG00000001254,ENSOARG00000020889,ENSOARG00000020112,ENSOARG00000007690,ENSOARG00000019564,ENSOARG00000016857,ENSOARG00000007234,ENSOARG00000019663,ENSOARG00000017006,ENSOARG00000000344,ENSOARG00000010664,ENSOARG00000017807,ENSOARG00000016642,ENSOARG00000014214,ENSOARG00000016257,ENSOARG00000019707,…	120	ENSOARG00000012667,ENSOARG00000002449,ENSOARG00000011464,ENSOARG00000017474,ENSOARG00000016766,ENSOARG00000017489,ENSOARG00000004502,ENSOARG00000019031,ENSOARG00000015282,ENSOARG00000006117,ENSOARG00000015118,ENSOARG00000011352,ENSOARG00000019235,ENSOARG00000016342,ENSOARG00000017973,ENSOARG00000004088,ENSOARG00000019817,ENSOARG00000003149,ENSOARG00000020665,ENSOARG00000013010,ENSOARG00000006034,…
GO:0005515	protein binding	molecular_function	7.6923e-11	1.3064e-08	470	677	10794	19130	386	ENSOARG00000008340,ENSOARG00000005795,ENSOARG00000015180,ENSOARG00000014774,ENSOARG00000015167,ENSOARG00000007977,ENSOARG00000016115,ENSOARG00000014042,ENSOARG00000007906,ENSOARG00000000042,ENSOARG00000003782,ENSOARG00000021097,ENSOARG00000006760,ENSOARG00000016937,ENSOARG00000025194,ENSOARG00000008285,ENSOARG00000003254,ENSOARG00000000276,ENSOARG00000007229,ENSOARG00000007984,ENSOARG00000005006,…	84	ENSOARG00000016363,ENSOARG00000006212,ENSOARG00000018110,ENSOARG00000020186,ENSOARG00000016285,ENSOARG00000000450,ENSOARG00000001504,ENSOARG00000016771,ENSOARG00000018548,ENSOARG00000011683,ENSOARG00000021060,ENSOARG00000009675,ENSOARG00000002260,ENSOARG00000005434,ENSOARG00000012314,ENSOARG00000021001,ENSOARG00000017394,ENSOARG00000007493,ENSOARG00000004312,ENSOARG00000004314,ENSOARG00000016636,…
GO:0060089	molecular transducer activity	molecular_function	5.4017e-06	0.00037257	95	677	1717	19130	83	ENSOARG00000010448,ENSOARG00000007234,ENSOARG00000014926,ENSOARG00000009234,ENSOARG00000007690,ENSOARG00000008208,ENSOARG00000002053,ENSOARG00000016047,ENSOARG00000006538,ENSOARG00000012274,ENSOARG00000011380,ENSOARG00000012180,ENSOARG00000004484,ENSOARG00000014188,ENSOARG00000014214,ENSOARG00000005746,ENSOARG00000009301,ENSOARG00000016642,ENSOARG00000008967,ENSOARG00000017562,ENSOARG00000017465,…	12	ENSOARG00000011865,ENSOARG00000014425,ENSOARG00000001264,ENSOARG00000011352,ENSOARG00000014433,ENSOARG00000017550,ENSOARG00000004617,ENSOARG00000002366,ENSOARG00000021060,ENSOARG00000017474,ENSOARG00000016766,ENSOARG00000019817
GO:0004872	receptor activity	molecular_function	1.3686e-05	0.00082642	84	677	1507	19130	73	ENSOARG00000007690,ENSOARG00000002053,ENSOARG00000016047,ENSOARG00000008208,ENSOARG00000006538,ENSOARG00000010448,ENSOARG00000014926,ENSOARG00000017562,ENSOARG00000016642,ENSOARG00000009301,ENSOARG00000008967,ENSOARG00000017465,ENSOARG00000006301,ENSOARG00000012274,ENSOARG00000014188,ENSOARG00000011380,ENSOARG00000012180,ENSOARG00000014214,ENSOARG00000009172,ENSOARG00000008893,ENSOARG00000017214,…	11	ENSOARG00000019817,ENSOARG00000016766,ENSOARG00000021060,ENSOARG00000002366,ENSOARG00000011352,ENSOARG00000001264,ENSOARG00000011865,ENSOARG00000014425,ENSOARG00000004617,ENSOARG00000017550,ENSOARG00000014433
GO:0004871	signal transducer activity	molecular_function	8.1625e-05	0.0037677	83	677	1568	19130	71	ENSOARG00000016109,ENSOARG00000007984,ENSOARG00000007229,ENSOARG00000014023,ENSOARG00000017205,ENSOARG00000016937,ENSOARG00000006760,ENSOARG00000008057,ENSOARG00000009800,ENSOARG00000015703,ENSOARG00000009256,ENSOARG00000021000,ENSOARG00000014236,ENSOARG00000000158,ENSOARG00000005792,ENSOARG00000014361,ENSOARG00000015180,ENSOARG00000013918,Novel00990,ENSOARG00000006358,ENSOARG00000019840,ENSOARG0…	12	ENSOARG00000004617,ENSOARG00000014433,ENSOARG00000017550,ENSOARG00000014425,ENSOARG00000011865,ENSOARG00000011352,ENSOARG00000001264,ENSOARG00000017474,ENSOARG00000016766,ENSOARG00000019817,ENSOARG00000002366,ENSOARG00000021060
GO:0005102	receptor binding	molecular_function	2.051e-12	5.2003e-10	78	677	978	19130	61	ENSOARG00000016193,ENSOARG00000004208,ENSOARG00000004787,ENSOARG00000005846,ENSOARG00000004812,ENSOARG00000013157,ENSOARG00000001060,ENSOARG00000004721,ENSOARG00000005167,ENSOARG00000013367,ENSOARG00000001094,ENSOARG00000017631,ENSOARG00000007991,ENSOARG00000002790,ENSOARG00000015592,ENSOARG00000000123,ENSOARG00000008715,ENSOARG00000002808,ENSOARG00000011146,ENSOARG00000000950,ENSOARG00000020249,…	17	Novel02021,ENSOARG00000002366,ENSOARG00000015118,ENSOARG00000016285,Novel01912,ENSOARG00000014723,ENSOARG00000020519,ENSOARG00000000450,ENSOARG00000016771,ENSOARG00000011019,ENSOARG00000021001,ENSOARG00000017394,ENSOARG00000008521,ENSOARG00000002386,ENSOARG00000000417,ENSOARG00000018980,ENSOARG00000006378
GO:0038023	signaling receptor activity	molecular_function	0.00019292	0.0074527	72	677	1357	19130	61	ENSOARG00000002053,ENSOARG00000021000,ENSOARG00000016047,ENSOARG00000008208,ENSOARG00000000158,ENSOARG00000014236,ENSOARG00000005792,ENSOARG00000007690,ENSOARG00000006538,ENSOARG00000014361,ENSOARG00000015180,ENSOARG00000013918,ENSOARG00000008057,ENSOARG00000010448,ENSOARG00000009800,ENSOARG00000015703,ENSOARG00000014926,ENSOARG00000009256,ENSOARG00000017205,ENSOARG00000009301,ENSOARG00000017562,…	11	ENSOARG00000021060,ENSOARG00000002366,ENSOARG00000019817,ENSOARG00000016766,ENSOARG00000017550,ENSOARG00000014433,ENSOARG00000004617,ENSOARG00000011352,ENSOARG00000001264,ENSOARG00000011865,ENSOARG00000014425
GO:0004888	transmembrane signaling receptor activity	molecular_function	0.0014951	0.040291	64	677	1274	19130	56	ENSOARG00000015044,ENSOARG00000013669,ENSOARG00000020667,ENSOARG00000019197,ENSOARG00000001094,ENSOARG00000017892,ENSOARG00000009401,ENSOARG00000001060,ENSOARG00000021005,ENSOARG00000012400,ENSOARG00000009932,ENSOARG00000011239,ENSOARG00000009172,ENSOARG00000019840,ENSOARG00000008984,ENSOARG00000001397,ENSOARG00000012367,ENSOARG00000013529,ENSOARG00000006358,Novel00990,ENSOARG00000016622,ENSOARG0…	8	ENSOARG00000016766,ENSOARG00000011352,ENSOARG00000001264,ENSOARG00000011865,ENSOARG00000014425,ENSOARG00000017550,ENSOARG00000014433,ENSOARG00000004617
GO:0046983	protein dimerization activity	molecular_function	2.5899e-06	0.0001984	56	677	843	19130	41	ENSOARG00000014623,ENSOARG00000014188,ENSOARG00000007984,ENSOARG00000007525,ENSOARG00000013298,ENSOARG00000006301,ENSOARG00000010664,ENSOARG00000009256,ENSOARG00000007840,ENSOARG00000009234,ENSOARG00000010448,ENSOARG00000010493,ENSOARG00000015379,ENSOARG00000008208,ENSOARG00000021000,ENSOARG00000007977,ENSOARG00000012064,ENSOARG00000008984,ENSOARG00000009084,ENSOARG00000003604,ENSOARG00000006358,…	15	ENSOARG00000004414,ENSOARG00000012490,ENSOARG00000011865,ENSOARG00000001504,ENSOARG00000017769,ENSOARG00000018980,ENSOARG00000018548,ENSOARG00000020376,ENSOARG00000011019,ENSOARG00000002366,ENSOARG00000020186,ENSOARG00000013010,ENSOARG00000013752,ENSOARG00000014590,ENSOARG00000004312
GO:0042802	identical protein binding	molecular_function	4.7062e-05	0.0024108	54	677	838	19130	39	ENSOARG00000010493,ENSOARG00000020968,ENSOARG00000010448,ENSOARG00000008057,ENSOARG00000016115,ENSOARG00000007840,ENSOARG00000012299,ENSOARG00000008208,ENSOARG00000007977,ENSOARG00000021000,ENSOARG00000014774,ENSOARG00000012064,ENSOARG00000013298,ENSOARG00000014188,ENSOARG00000018510,ENSOARG00000010664,ENSOARG00000007864,ENSOARG00000012145,ENSOARG00000003782,ENSOARG00000006301,ENSOARG00000013367,…	15	ENSOARG00000013752,ENSOARG00000014590,ENSOARG00000004312,ENSOARG00000013010,ENSOARG00000016766,ENSOARG00000020376,ENSOARG00000018548,ENSOARG00000018980,ENSOARG00000017769,ENSOARG00000014433,ENSOARG00000004871,ENSOARG00000014824,ENSOARG00000011865,ENSOARG00000004414,ENSOARG00000016285
GO:0001071	nucleic acid binding transcription factor activity	molecular_function	6.1314e-05	0.0029832	50	677	773	19130	34	ENSOARG00000009999,ENSOARG00000014822,ENSOARG00000004403,ENSOARG00000009084,ENSOARG00000010410,ENSOARG00000015236,ENSOARG00000003908,ENSOARG00000010939,ENSOARG00000012131,ENSOARG00000006421,ENSOARG00000017214,ENSOARG00000013482,ENSOARG00000001783,ENSOARG00000016306,ENSOARG00000012360,ENSOARG00000004499,ENSOARG00000007763,ENSOARG00000014623,ENSOARG00000017420,ENSOARG00000009058,ENSOARG00000013317,…	16	Novel00685,ENSOARG00000016342,ENSOARG00000019817,ENSOARG00000021060,ENSOARG00000009675,Novel00191,ENSOARG00000012314,ENSOARG00000005434,ENSOARG00000012667,ENSOARG00000006034,ENSOARG00000004414,ENSOARG00000020376,ENSOARG00000001504,ENSOARG00000016363,Novel01871,ENSOARG00000002366
GO:0003700	transcription factor activity, sequence-specific DNA binding	molecular_function	6.1314e-05	0.0029832	50	677	773	19130	34	ENSOARG00000009999,ENSOARG00000014822,ENSOARG00000010410,ENSOARG00000015236,ENSOARG00000009084,ENSOARG00000004403,ENSOARG00000012131,ENSOARG00000010939,ENSOARG00000003908,ENSOARG00000017214,ENSOARG00000006421,ENSOARG00000013482,ENSOARG00000001783,ENSOARG00000012360,ENSOARG00000016306,ENSOARG00000007763,ENSOARG00000004499,ENSOARG00000014623,ENSOARG00000013317,ENSOARG00000007984,ENSOARG00000017420,…	16	ENSOARG00000005434,ENSOARG00000012314,ENSOARG00000019817,ENSOARG00000021060,Novel00191,ENSOARG00000009675,ENSOARG00000016342,Novel00685,ENSOARG00000016363,ENSOARG00000002366,Novel01871,ENSOARG00000020376,ENSOARG00000001504,ENSOARG00000012667,ENSOARG00000006034,ENSOARG00000004414
GO:0098772	molecular function regulator	molecular_function	0.00011166	0.0048089	50	677	792	19130	49	ENSOARG00000005599,ENSOARG00000020437,ENSOARG00000020138,ENSOARG00000020030,ENSOARG00000004983,ENSOARG00000000950,ENSOARG00000014762,ENSOARG00000014288,ENSOARG00000000571,ENSOARG00000020818,ENSOARG00000019876,ENSOARG00000003798,ENSOARG00000021090,ENSOARG00000009999,ENSOARG00000003028,ENSOARG00000017631,ENSOARG00000013157,ENSOARG00000010543,ENSOARG00000008161,ENSOARG00000005926,ENSOARG00000008332,…	1	ENSOARG00000020519
GO:0043565	sequence-specific DNA binding	molecular_function	0.0005059	0.016741	47	677	795	19130	27	ENSOARG00000006614,ENSOARG00000010493,ENSOARG00000009234,ENSOARG00000016306,ENSOARG00000009957,ENSOARG00000012360,ENSOARG00000014774,ENSOARG00000006553,ENSOARG00000015379,ENSOARG00000001783,ENSOARG00000017214,ENSOARG00000013176,ENSOARG00000016271,ENSOARG00000017420,ENSOARG00000009058,ENSOARG00000007984,ENSOARG00000012131,ENSOARG00000010939,ENSOARG00000004403,Novel02027,ENSOARG00000013446,ENSOARG0…	20	ENSOARG00000001487,ENSOARG00000016342,ENSOARG00000002386,ENSOARG00000012314,ENSOARG00000005434,ENSOARG00000019817,ENSOARG00000017964,ENSOARG00000021060,ENSOARG00000009675,ENSOARG00000020376,ENSOARG00000001504,ENSOARG00000002449,ENSOARG00000012667,ENSOARG00000006034,ENSOARG00000019395,ENSOARG00000004414,ENSOARG00000016352,ENSOARG00000016363,ENSOARG00000002366,Novel01871
GO:0032403	protein complex binding	molecular_function	0.00030369	0.011	42	677	637	19130	36	ENSOARG00000009800,ENSOARG00000007175,ENSOARG00000012392,ENSOARG00000014042,ENSOARG00000021018,ENSOARG00000017739,ENSOARG00000016133,ENSOARG00000008091,ENSOARG00000001254,ENSOARG00000007690,ENSOARG00000016042,ENSOARG00000007229,ENSOARG00000008285,ENSOARG00000004484,ENSOARG00000014188,ENSOARG00000006029,ENSOARG00000008249,ENSOARG00000020050,ENSOARG00000007864,ENSOARG00000010664,ENSOARG00000007932,…	6	ENSOARG00000000450,ENSOARG00000016771,ENSOARG00000004312,Novel02021,ENSOARG00000000417,ENSOARG00000006034
GO:0000975	regulatory region DNA binding	molecular_function	0.0007457	0.022869	36	677	548	19130	22	ENSOARG00000014774,ENSOARG00000006553,ENSOARG00000015379,ENSOARG00000001783,ENSOARG00000013176,ENSOARG00000008340,ENSOARG00000006614,ENSOARG00000010493,ENSOARG00000007840,ENSOARG00000009234,ENSOARG00000009957,ENSOARG00000012360,ENSOARG00000004499,ENSOARG00000007763,ENSOARG00000009999,ENSOARG00000017420,ENSOARG00000003908,ENSOARG00000012131,ENSOARG00000007984,ENSOARG00000010939,ENSOARG00000004403,…	14	ENSOARG00000001504,ENSOARG00000002449,ENSOARG00000017769,ENSOARG00000016342,ENSOARG00000020376,ENSOARG00000004414,ENSOARG00000002386,ENSOARG00000012667,ENSOARG00000006034,ENSOARG00000012314,ENSOARG00000005434,ENSOARG00000009675,ENSOARG00000002366,ENSOARG00000019817
GO:0001067	regulatory region nucleic acid binding	molecular_function	0.0007457	0.022869	36	677	548	19130	22	ENSOARG00000012131,ENSOARG00000007984,ENSOARG00000010939,ENSOARG00000003908,ENSOARG00000017420,ENSOARG00000014623,ENSOARG00000004403,ENSOARG00000007763,ENSOARG00000004499,ENSOARG00000009999,ENSOARG00000010493,ENSOARG00000006614,ENSOARG00000012360,ENSOARG00000009957,ENSOARG00000007840,ENSOARG00000009234,ENSOARG00000015379,ENSOARG00000006553,ENSOARG00000001783,ENSOARG00000014774,ENSOARG00000013176,…	14	ENSOARG00000005434,ENSOARG00000012314,ENSOARG00000009675,ENSOARG00000002366,ENSOARG00000019817,ENSOARG00000002449,ENSOARG00000001504,ENSOARG00000017769,ENSOARG00000016342,ENSOARG00000020376,ENSOARG00000002386,ENSOARG00000004414,ENSOARG00000006034,ENSOARG00000012667
GO:0030234	enzyme regulator activity	molecular_function	0.00075841	0.023101	35	677	557	19130	34	ENSOARG00000013157,ENSOARG00000008332,ENSOARG00000005926,ENSOARG00000000405,ENSOARG00000012344,ENSOARG00000016888,ENSOARG00000004787,ENSOARG00000020138,ENSOARG00000020030,ENSOARG00000000571,ENSOARG00000014762,ENSOARG00000000950,ENSOARG00000019876,ENSOARG00000009999,ENSOARG00000021090,ENSOARG00000003028,ENSOARG00000010448,ENSOARG00000006591,ENSOARG00000018210,ENSOARG00000008189,ENSOARG00000002479,…	1	ENSOARG00000020519
GO:0044212	transcription regulatory region DNA binding	molecular_function	0.0011794	0.033226	35	677	542	19130	21	ENSOARG00000012131,ENSOARG00000010939,ENSOARG00000007984,ENSOARG00000017420,ENSOARG00000014623,ENSOARG00000004403,ENSOARG00000007763,ENSOARG00000004499,ENSOARG00000009999,ENSOARG00000010493,ENSOARG00000006614,ENSOARG00000012360,ENSOARG00000009957,ENSOARG00000009234,ENSOARG00000007840,ENSOARG00000006553,ENSOARG00000001783,ENSOARG00000015379,ENSOARG00000014774,ENSOARG00000008340,ENSOARG00000013176	14	ENSOARG00000006034,ENSOARG00000012667,ENSOARG00000004414,ENSOARG00000002386,ENSOARG00000016342,ENSOARG00000020376,ENSOARG00000017769,ENSOARG00000002449,ENSOARG00000001504,ENSOARG00000019817,ENSOARG00000009675,ENSOARG00000002366,ENSOARG00000012314,ENSOARG00000005434
GO:0042803	protein homodimerization activity	molecular_function	0.00015024	0.0061891	34	677	473	19130	25	ENSOARG00000014188,ENSOARG00000009084,ENSOARG00000003604,ENSOARG00000012131,ENSOARG00000013298,ENSOARG00000006358,ENSOARG00000012461,ENSOARG00000017265,ENSOARG00000006301,ENSOARG00000020249,ENSOARG00000009599,ENSOARG00000010664,ENSOARG00000007849,ENSOARG00000007840,ENSOARG00000013367,ENSOARG00000010493,ENSOARG00000001094,ENSOARG00000017214,ENSOARG00000004787,ENSOARG00000004797,ENSOARG00000007977,…	9	ENSOARG00000004414,ENSOARG00000017769,ENSOARG00000020376,ENSOARG00000018548,ENSOARG00000018980,ENSOARG00000013010,ENSOARG00000014590,ENSOARG00000013752,ENSOARG00000004312
GO:0004713	protein tyrosine kinase activity	molecular_function	0.00095632	0.027678	33	677	460	19130	27	ENSOARG00000001060,ENSOARG00000012355,ENSOARG00000007234,ENSOARG00000020968,ENSOARG00000010448,ENSOARG00000017631,ENSOARG00000012732,ENSOARG00000011235,ENSOARG00000002820,ENSOARG00000002053,ENSOARG00000020214,ENSOARG00000014631,ENSOARG00000006538,ENSOARG00000014750,ENSOARG00000017034,ENSOARG00000012400,ENSOARG00000013646,ENSOARG00000006358,ENSOARG00000007525,ENSOARG00000015215,ENSOARG00000005746,…	6	ENSOARG00000020763,ENSOARG00000017826,ENSOARG00000011352,ENSOARG00000011865,ENSOARG00000006526,ENSOARG00000014425
GO:0000981	RNA polymerase II transcription factor activity, sequence-specific DNA binding	molecular_function	0.00022186	0.0083905	31	677	425	19130	19	ENSOARG00000017214,ENSOARG00000013176,ENSOARG00000014774,ENSOARG00000015379,ENSOARG00000006553,ENSOARG00000001783,ENSOARG00000007840,ENSOARG00000009234,ENSOARG00000009957,ENSOARG00000012360,ENSOARG00000006614,ENSOARG00000010493,ENSOARG00000004499,ENSOARG00000007763,ENSOARG00000004403,ENSOARG00000014623,ENSOARG00000012131,ENSOARG00000010939,ENSOARG00000007984	12	ENSOARG00000005434,ENSOARG00000012314,ENSOARG00000021060,ENSOARG00000009675,ENSOARG00000002366,ENSOARG00000019817,ENSOARG00000016363,ENSOARG00000020376,ENSOARG00000016342,ENSOARG00000004414,ENSOARG00000012667,ENSOARG00000006034
GO:0000976	transcription regulatory region sequence-specific DNA binding	molecular_function	0.0016093	0.042749	29	677	432	19130	17	ENSOARG00000006553,ENSOARG00000015379,ENSOARG00000001783,ENSOARG00000014774,ENSOARG00000013176,ENSOARG00000010493,ENSOARG00000006614,ENSOARG00000012360,ENSOARG00000009957,ENSOARG00000007763,ENSOARG00000004499,ENSOARG00000009999,ENSOARG00000012131,ENSOARG00000007984,ENSOARG00000010939,ENSOARG00000017420,ENSOARG00000004403	12	ENSOARG00000002386,ENSOARG00000004414,ENSOARG00000006034,ENSOARG00000012667,ENSOARG00000002449,ENSOARG00000020376,ENSOARG00000016342,ENSOARG00000009675,ENSOARG00000002366,ENSOARG00000019817,ENSOARG00000005434,ENSOARG00000012314
GO:0000977	RNA polymerase II regulatory region sequence-specific DNA binding	molecular_function	0.00072732	0.02242	28	677	393	19130	17	ENSOARG00000006614,ENSOARG00000010493,ENSOARG00000009957,ENSOARG00000012360,ENSOARG00000014774,ENSOARG00000015379,ENSOARG00000006553,ENSOARG00000001783,ENSOARG00000013176,ENSOARG00000017420,ENSOARG00000007984,ENSOARG00000012131,ENSOARG00000010939,ENSOARG00000004403,ENSOARG00000004499,ENSOARG00000007763,ENSOARG00000009999	11	ENSOARG00000006034,ENSOARG00000012667,ENSOARG00000004414,ENSOARG00000020376,ENSOARG00000016342,ENSOARG00000002449,ENSOARG00000019817,ENSOARG00000009675,ENSOARG00000002366,ENSOARG00000012314,ENSOARG00000005434
GO:0001012	RNA polymerase II regulatory region DNA binding	molecular_function	0.00075772	0.023101	28	677	394	19130	17	ENSOARG00000004403,ENSOARG00000017420,ENSOARG00000012131,ENSOARG00000010939,ENSOARG00000007984,ENSOARG00000009999,ENSOARG00000004499,ENSOARG00000007763,ENSOARG00000009957,ENSOARG00000012360,ENSOARG00000006614,ENSOARG00000010493,ENSOARG00000013176,ENSOARG00000014774,ENSOARG00000006553,ENSOARG00000015379,ENSOARG00000001783	11	ENSOARG00000004414,ENSOARG00000012667,ENSOARG00000006034,ENSOARG00000002449,ENSOARG00000020376,ENSOARG00000016342,ENSOARG00000002366,ENSOARG00000009675,ENSOARG00000019817,ENSOARG00000012314,ENSOARG00000005434
GO:0003779	actin binding	molecular_function	0.00066976	0.021042	23	677	291	19130	21	ENSOARG00000016888,ENSOARG00000008705,ENSOARG00000021147,ENSOARG00000009972,ENSOARG00000020622,ENSOARG00000001634,ENSOARG00000007175,ENSOARG00000014042,Novel01927,ENSOARG00000007864,ENSOARG00000012145,ENSOARG00000010462,ENSOARG00000020050,ENSOARG00000008715,ENSOARG00000007932,ENSOARG00000003604,ENSOARG00000014214,ENSOARG00000000276,ENSOARG00000010473,ENSOARG00000006029,ENSOARG00000019286	2	ENSOARG00000011188,ENSOARG00000004312
GO:0001228	transcriptional activator activity, RNA polymerase II transcription regulatory region sequence-specific binding	molecular_function	0.00013664	0.0057072	22	677	251	19130	14	ENSOARG00000017214,ENSOARG00000013176,ENSOARG00000004499,ENSOARG00000007763,ENSOARG00000001783,ENSOARG00000006553,ENSOARG00000015379,ENSOARG00000009957,ENSOARG00000012360,ENSOARG00000014623,ENSOARG00000006614,ENSOARG00000012131,ENSOARG00000007984,ENSOARG00000010939	8	ENSOARG00000016342,ENSOARG00000004414,ENSOARG00000012667,ENSOARG00000006034,ENSOARG00000005434,ENSOARG00000009675,ENSOARG00000016363,ENSOARG00000019817
GO:0000982	transcription factor activity, RNA polymerase II core promoter proximal region sequence-specific binding	molecular_function	0.00015488	0.006308	22	677	254	19130	13	ENSOARG00000007840,ENSOARG00000009957,ENSOARG00000014623,ENSOARG00000012360,ENSOARG00000010493,ENSOARG00000010939,ENSOARG00000007984,ENSOARG00000017214,ENSOARG00000013176,ENSOARG00000004499,ENSOARG00000007763,ENSOARG00000006553,ENSOARG00000001783	9	ENSOARG00000009675,ENSOARG00000016363,ENSOARG00000005434,ENSOARG00000012314,ENSOARG00000004414,ENSOARG00000006034,ENSOARG00000012667,ENSOARG00000020376,ENSOARG00000016342
GO:0005126	cytokine receptor binding	molecular_function	1.0654e-06	8.8385e-05	20	677	190	19130	18	ENSOARG00000020138,ENSOARG00000006353,ENSOARG00000020030,ENSOARG00000006813,ENSOARG00000004774,ENSOARG00000014582,ENSOARG00000009921,ENSOARG00000017807,ENSOARG00000000123,ENSOARG00000015592,ENSOARG00000004721,ENSOARG00000007991,ENSOARG00000013918,ENSOARG00000002699,ENSOARG00000014236,ENSOARG00000020741,ENSOARG00000016047,ENSOARG00000012064	2	ENSOARG00000014723,ENSOARG00000011019
GO:0000978	RNA polymerase II core promoter proximal region sequence-specific DNA binding	molecular_function	0.0010447	0.029899	19	677	233	19130	11	ENSOARG00000006553,ENSOARG00000001783,ENSOARG00000007763,ENSOARG00000004499,ENSOARG00000014774,ENSOARG00000013176,ENSOARG00000010939,ENSOARG00000010493,ENSOARG00000017420,ENSOARG00000012360,ENSOARG00000009957	8	ENSOARG00000020376,ENSOARG00000016342,ENSOARG00000012667,ENSOARG00000006034,ENSOARG00000004414,ENSOARG00000005434,ENSOARG00000012314,ENSOARG00000009675
GO:0000987	core promoter proximal region sequence-specific DNA binding	molecular_function	0.0017483	0.045548	19	677	243	19130	11	ENSOARG00000007763,ENSOARG00000006553,ENSOARG00000001783,ENSOARG00000014774,ENSOARG00000004499,ENSOARG00000013176,ENSOARG00000010493,ENSOARG00000010939,ENSOARG00000017420,ENSOARG00000012360,ENSOARG00000009957	8	ENSOARG00000004414,ENSOARG00000012667,ENSOARG00000006034,ENSOARG00000016342,ENSOARG00000020376,ENSOARG00000009675,ENSOARG00000012314,ENSOARG00000005434
GO:0001159	core promoter proximal region DNA binding	molecular_function	0.0018152	0.046681	19	677	244	19130	11	ENSOARG00000017420,ENSOARG00000010493,ENSOARG00000010939,ENSOARG00000009957,ENSOARG00000012360,ENSOARG00000004499,ENSOARG00000014774,ENSOARG00000001783,ENSOARG00000006553,ENSOARG00000007763,ENSOARG00000013176	8	ENSOARG00000009675,ENSOARG00000012314,ENSOARG00000005434,ENSOARG00000012667,ENSOARG00000006034,ENSOARG00000004414,ENSOARG00000020376,ENSOARG00000016342
GO:0001077	transcriptional activator activity, RNA polymerase II core promoter proximal region sequence-specific binding	molecular_function	7.3115e-05	0.0034821	18	677	176	19130	11	ENSOARG00000007984,ENSOARG00000010939,ENSOARG00000009957,ENSOARG00000014623,ENSOARG00000012360,ENSOARG00000004499,ENSOARG00000007763,ENSOARG00000006553,ENSOARG00000001783,ENSOARG00000013176,ENSOARG00000017214	7	ENSOARG00000004414,ENSOARG00000009675,ENSOARG00000006034,ENSOARG00000012667,ENSOARG00000016363,ENSOARG00000005434,ENSOARG00000016342
GO:0004857	enzyme inhibitor activity	molecular_function	0.00081311	0.02456	18	677	239	19130	17	ENSOARG00000013157,ENSOARG00000008189,ENSOARG00000018210,ENSOARG00000018337,ENSOARG00000008332,ENSOARG00000002699,ENSOARG00000004787,ENSOARG00000019971,ENSOARG00000015144,ENSOARG00000011660,ENSOARG00000018510,ENSOARG00000020030,ENSOARG00000001568,ENSOARG00000020138,ENSOARG00000000950,ENSOARG00000000571,ENSOARG00000021090	1	ENSOARG00000020519
GO:0005125	cytokine activity	molecular_function	3.022e-06	0.0002248	15	677	134	19130	11	ENSOARG00000020741,ENSOARG00000016193,ENSOARG00000000123,ENSOARG00000002699,ENSOARG00000004721,ENSOARG00000019067,ENSOARG00000014582,ENSOARG00000013157,ENSOARG00000015592,ENSOARG00000006353,ENSOARG00000004774	4	Novel01912,ENSOARG00000014723,ENSOARG00000016285,ENSOARG00000011019
GO:0061134	peptidase regulator activity	molecular_function	0.00041	0.014167	15	677	166	19130	14	ENSOARG00000011660,ENSOARG00000013157,ENSOARG00000015144,ENSOARG00000001568,ENSOARG00000020138,ENSOARG00000018210,ENSOARG00000018510,ENSOARG00000018337,ENSOARG00000005926,ENSOARG00000000950,ENSOARG00000008332,ENSOARG00000021090,ENSOARG00000002699,ENSOARG00000003994	1	ENSOARG00000020519
GO:0004866	endopeptidase inhibitor activity	molecular_function	0.00032859	0.011807	13	677	127	19130	12	ENSOARG00000020138,ENSOARG00000018210,ENSOARG00000001568,ENSOARG00000018510,ENSOARG00000011660,ENSOARG00000013157,ENSOARG00000015144,ENSOARG00000021090,ENSOARG00000002699,ENSOARG00000008332,ENSOARG00000018337,ENSOARG00000000950	1	ENSOARG00000020519
GO:0061135	endopeptidase regulator activity	molecular_function	0.00049197	0.01634	13	677	132	19130	12	ENSOARG00000021090,ENSOARG00000002699,ENSOARG00000000950,ENSOARG00000018337,ENSOARG00000008332,ENSOARG00000001568,ENSOARG00000020138,ENSOARG00000018210,ENSOARG00000018510,ENSOARG00000011660,ENSOARG00000013157,ENSOARG00000015144	1	ENSOARG00000020519
GO:0030414	peptidase inhibitor activity	molecular_function	0.00083483	0.025131	13	677	144	19130	12	ENSOARG00000008332,ENSOARG00000000950,ENSOARG00000018337,ENSOARG00000021090,ENSOARG00000002699,ENSOARG00000011660,ENSOARG00000015144,ENSOARG00000013157,ENSOARG00000020138,ENSOARG00000018210,ENSOARG00000001568,ENSOARG00000018510	1	ENSOARG00000020519
GO:0019955	cytokine binding	molecular_function	1.943e-06	0.00015341	12	677	62	19130	11	ENSOARG00000019197,ENSOARG00000010344,ENSOARG00000006358,ENSOARG00000014214,ENSOARG00000007229,ENSOARG00000000950,ENSOARG00000017562,ENSOARG00000014277,ENSOARG00000016047,ENSOARG00000013918,ENSOARG00000010462	1	ENSOARG00000013752
GO:0004896	cytokine receptor activity	molecular_function	4.2323e-06	0.0003022	12	677	65	19130	12	ENSOARG00000007229,ENSOARG00000014214,ENSOARG00000014023,ENSOARG00000016109,ENSOARG00000019197,ENSOARG00000011239,ENSOARG00000010462,ENSOARG00000009932,ENSOARG00000013918,ENSOARG00000014277,ENSOARG00000014236,ENSOARG00000017562	0
GO:0019199	transmembrane receptor protein kinase activity	molecular_function	3.732e-05	0.0019702	12	677	74	19130	9	ENSOARG00000012180,ENSOARG00000010448,ENSOARG00000006358,ENSOARG00000001060,ENSOARG00000015180,ENSOARG00000012400,ENSOARG00000006538,ENSOARG00000016047,ENSOARG00000002053	3	ENSOARG00000011352,ENSOARG00000014425,ENSOARG00000011865
GO:0019838	growth factor binding	molecular_function	8.1593e-05	0.0037677	12	677	87	19130	10	ENSOARG00000006538,ENSOARG00000000950,ENSOARG00000016047,ENSOARG00000006007,ENSOARG00000012180,ENSOARG00000002263,ENSOARG00000010448,ENSOARG00000010344,ENSOARG00000019197,ENSOARG00000001060	2	ENSOARG00000011865,ENSOARG00000004871
GO:0001948	glycoprotein binding	molecular_function	0.00012057	0.0051312	11	677	76	19130	9	ENSOARG00000020968,ENSOARG00000013367,ENSOARG00000012367,ENSOARG00000003782,ENSOARG00000004787,ENSOARG00000006301,ENSOARG00000009000,ENSOARG00000020861,ENSOARG00000015718	2	ENSOARG00000012178,ENSOARG00000017973
GO:0004714	transmembrane receptor protein tyrosine kinase activity	molecular_function	9.9003e-05	0.0044225	10	677	57	19130	7	ENSOARG00000006538,ENSOARG00000012180,ENSOARG00000012400,ENSOARG00000002053,ENSOARG00000001060,ENSOARG00000006358,ENSOARG00000010448	3	ENSOARG00000011352,ENSOARG00000011865,ENSOARG00000014425
GO:0008083	growth factor activity	molecular_function	0.0015571	0.041588	10	677	103	19130	6	ENSOARG00000012064,ENSOARG00000018039,ENSOARG00000006813,ENSOARG00000020138,ENSOARG00000006353,ENSOARG00000015592	4	ENSOARG00000015118,ENSOARG00000006378,ENSOARG00000021001,ENSOARG00000016285
GO:0003823	antigen binding	molecular_function	8.9852e-06	0.00056556	9	677	42	19130	7	ENSOARG00000007252,ENSOARG00000000058,ENSOARG00000014069,ENSOARG00000009042,ENSOARG00000007229,ENSOARG00000016610,ENSOARG00000008091	2	ENSOARG00000007493,ENSOARG00000017973
GO:0004879	RNA polymerase II transcription factor activity, ligand-activated sequence-specific DNA binding	molecular_function	0.00038424	0.01351	7	677	36	19130	4	ENSOARG00000007984,ENSOARG00000010939,ENSOARG00000017214,ENSOARG00000009234	3	ENSOARG00000019817,ENSOARG00000021060,ENSOARG00000002366
GO:0098531	transcription factor activity, direct ligand regulated sequence-specific DNA binding	molecular_function	0.00038424	0.01351	7	677	36	19130	4	ENSOARG00000010939,ENSOARG00000007984,ENSOARG00000009234,ENSOARG00000017214	3	ENSOARG00000002366,ENSOARG00000021060,ENSOARG00000019817
GO:0004715	non-membrane spanning protein tyrosine kinase activity	molecular_function	0.00066055	0.020825	7	677	37	19130	7	ENSOARG00000015215,ENSOARG00000002820,ENSOARG00000011171,ENSOARG00000012355,ENSOARG00000020968,ENSOARG00000013646,ENSOARG00000014631	0
GO:0017124	SH3 domain binding	molecular_function	0.00075147	0.023007	7	677	40	19130	7	ENSOARG00000014762,ENSOARG00000019324,ENSOARG00000003585,ENSOARG00000019707,ENSOARG00000012145,ENSOARG00000008984,ENSOARG00000020050	0
GO:0001637	G-protein coupled chemoattractant receptor activity	molecular_function	9.7169e-05	0.0043622	6	677	23	19130	6	ENSOARG00000010462,ENSOARG00000014214,ENSOARG00000014023,ENSOARG00000014277,ENSOARG00000014236,ENSOARG00000017562	0
GO:0004950	chemokine receptor activity	molecular_function	9.7169e-05	0.0043622	6	677	23	19130	6	ENSOARG00000014277,ENSOARG00000017562,ENSOARG00000014236,ENSOARG00000014214,ENSOARG00000010462,ENSOARG00000014023	0
GO:0042605	peptide antigen binding	molecular_function	0.00010078	0.0044907	6	677	24	19130	4	ENSOARG00000016610,ENSOARG00000009042,ENSOARG00000014069,ENSOARG00000000058	2	ENSOARG00000017973,ENSOARG00000007493
GO:0043394	proteoglycan binding	molecular_function	0.00017663	0.0069806	6	677	24	19130	5	ENSOARG00000004787,ENSOARG00000015718,ENSOARG00000013367,ENSOARG00000009000,ENSOARG00000020861	1	ENSOARG00000012178
GO:0035591	signaling adaptor activity	molecular_function	0.00041125	0.014183	6	677	28	19130	6	ENSOARG00000020622,ENSOARG00000015970,ENSOARG00000014762,ENSOARG00000001158,ENSOARG00000014085,ENSOARG00000010631	0
GO:0033293	monocarboxylic acid binding	molecular_function	0.00041535	0.014297	6	677	28	19130	3	ENSOARG00000018510,ENSOARG00000006760,ENSOARG00000015144	3	ENSOARG00000000450,ENSOARG00000000417,ENSOARG00000006212
GO:0032813	tumor necrosis factor receptor superfamily binding	molecular_function	0.00065079	0.020626	6	677	34	19130	6	ENSOARG00000002699,ENSOARG00000020138,ENSOARG00000009921,ENSOARG00000014582,ENSOARG00000020741,ENSOARG00000007991	0
GO:0036041	long-chain fatty acid binding	molecular_function	7.6021e-05	0.0035825	4	677	8	19130	2	ENSOARG00000006760,ENSOARG00000018510	2	ENSOARG00000000450,ENSOARG00000000417
GO:0008329	signaling pattern recognition receptor activity	molecular_function	0.00026241	0.0097199	4	677	10	19130	4	ENSOARG00000019840,ENSOARG00000015044,ENSOARG00000005792,ENSOARG00000009301	0
GO:0038187	pattern recognition receptor activity	molecular_function	0.00026241	0.0097199	4	677	10	19130	4	ENSOARG00000015044,ENSOARG00000019840,ENSOARG00000009301,ENSOARG00000005792	0
GO:0019956	chemokine binding	molecular_function	0.00043242	0.014743	4	677	11	19130	4	ENSOARG00000017562,ENSOARG00000000950,ENSOARG00000014277,ENSOARG00000014214	0
GO:0005504	fatty acid binding	molecular_function	0.00099426	0.02873	4	677	14	19130	2	ENSOARG00000006760,ENSOARG00000018510	2	ENSOARG00000000417,ENSOARG00000000450
GO:0050542	icosanoid binding	molecular_function	1.3864e-05	0.00082642	3	677	3	19130	1	ENSOARG00000018510	2	ENSOARG00000000417,ENSOARG00000000450
GO:0050543	icosatetraenoic acid binding	molecular_function	1.3864e-05	0.00082642	3	677	3	19130	1	ENSOARG00000018510	2	ENSOARG00000000450,ENSOARG00000000417
GO:0050544	arachidonic acid binding	molecular_function	1.3864e-05	0.00082642	3	677	3	19130	1	ENSOARG00000018510	2	ENSOARG00000000450,ENSOARG00000000417
GO:1901567	fatty acid derivative binding	molecular_function	1.3864e-05	0.00082642	3	677	3	19130	1	ENSOARG00000018510	2	ENSOARG00000000417,ENSOARG00000000450
GO:0019958	C-X-C chemokine binding	molecular_function	0.00084938	0.025442	3	677	6	19130	3	ENSOARG00000014277,ENSOARG00000000950,ENSOARG00000017562	0
GO:0016494	C-X-C chemokine receptor activity	molecular_function	0.0012727	0.03552	3	677	7	19130	3	ENSOARG00000010462,ENSOARG00000017562,ENSOARG00000014277	0
GO:0008191	metalloendopeptidase inhibitor activity	molecular_function	0.0018643	0.047739	3	677	8	19130	3	ENSOARG00000020138,ENSOARG00000018210,ENSOARG00000013157	0
GO:0048551	metalloenzyme inhibitor activity	molecular_function	0.0018643	0.047739	3	677	8	19130	3	ENSOARG00000018210,ENSOARG00000020138,ENSOARG00000013157	0
GO:0043185	vascular endothelial growth factor receptor 3 binding	molecular_function	0.0011541	0.032667	2	677	2	19130	2	ENSOARG00000006813,ENSOARG00000012064	0
GO:0035662	Toll-like receptor 4 binding	molecular_function	0.0014367	0.03905	2	677	3	19130	0		2	ENSOARG00000000417,ENSOARG00000000450
