# Supplementary material for: Comparative transcriptome analysis reveals potentially novel roles of Homeobox genes in adipose deposition in fat-tailed sheep
Source: Sci Rep. 2017 Nov 3;7:14491. doi: 10.1038/s41598-017-14967-9 (PMC5670210; doi:10.1038/s41598-017-14967-9)
Supplement: Supplementary file 7 — Dataset 6 [file 41598_2017_14967_MOESM7_ESM.xlsx]

## Sheet: SAT vs. VAT
Supplementary Table S6. List of KEGG pathways for DEGs between any two of three adipose types.
Pathways	Pathway ID	Input number	Background number	p-value	Corrected p-value
HTLV-I infection	oas05166	13	275	0.000594283	0.0143618
Cytokine-cytokine receptor interaction	oas04060	10	235	0.0050468	0.0609821
Cell adhesion molecules (CAMs)	oas04514	9	156	0.00111195	0.0230333
Natural killer cell mediated cytotoxicity	oas04650	8	105	0.000379386	0.0134849
T cell receptor signaling pathway	oas04660	8	108	0.000452544	0.0134849
Epstein-Barr virus infection	oas05169	8	196	0.014426	0.139451
Metabolic pathways	oas01100	8	1256	0.999208	0.999998
Viral myocarditis	oas05416	7	75	0.000281341	0.0134849
Antigen processing and presentation	oas04612	7	82	0.000464995	0.0134849
Measles	oas05162	7	136	0.00696307	0.077665
Chemokine signaling pathway	oas04062	7	182	0.0281191	0.226515
Viral carcinogenesis	oas05203	7	220	0.0637012	0.401595
Endocytosis	oas04144	7	226	0.0710549	0.428881
PI3K-Akt signaling pathway	oas04151	7	356	0.330888	0.860219
Primary immunodeficiency	oas05340	6	33	2.78802e-05	0.00404263
Axon guidance	oas04360	6	127	0.0175088	0.14934
Jak-STAT signaling pathway	oas04630	6	167	0.0527095	0.351757
Herpes simplex infection	oas05168	6	213	0.125279	0.567672
Ras signaling pathway	oas04014	6	233	0.166949	0.711988
Graft-versus-host disease	oas05332	5	49	0.00146336	0.0265235
Allograft rejection	oas05330	5	54	0.00217547	0.0350493
Type I diabetes mellitus	oas04940	5	59	0.00311175	0.0451204
Autoimmune thyroid disease	oas05320	5	63	0.00404654	0.0533407
Fc gamma R-mediated phagocytosis	oas04666	5	87	0.0141606	0.139451
NF-kappa B signaling pathway	oas04064	5	89	0.0154195	0.139739
TNF signaling pathway	oas04668	5	110	0.0332917	0.247863
MAPK signaling pathway	oas04010	5	255	0.375201	0.860219
Neuroactive ligand-receptor interaction	oas04080	5	286	0.469151	0.860219
Pathways in cancer	oas05200	5	336	0.609115	0.87819
Inflammatory bowel disease (IBD)	oas05321	4	75	0.0341879	0.247863
Chagas disease (American trypanosomiasis)	oas05142	4	115	0.113289	0.531044
Wnt signaling pathway	oas04310	4	141	0.187373	0.754699
Transcriptional misregulation in cancer	oas05202	4	168	0.276189	0.860219
Phagosome	oas04145	4	169	0.27962	0.860219
Rap1 signaling pathway	oas04015	4	212	0.429399	0.860219
cAMP signaling pathway	oas04024	4	216	0.443131	0.860219
Regulation of actin cytoskeleton	oas04810	4	220	0.456763	0.860219
Notch signaling pathway	oas04330	3	52	0.0533701	0.351757
Drug metabolism - cytochrome P450	oas00982	3	60	0.0739449	0.428881
Metabolism of xenobiotics by cytochrome P450	oas00980	3	62	0.0795645	0.443725
B cell receptor signaling pathway	oas04662	3	69	0.100612	0.531044
Colorectal cancer	oas05210	3	70	0.103784	0.531044
Chemical carcinogenesis	oas05204	3	73	0.113534	0.531044
Hematopoietic cell lineage	oas04640	3	90	0.174435	0.72266
Neurotrophin signaling pathway	oas04722	3	123	0.309199	0.860219
Osteoclast differentiation	oas04380	3	127	0.326112	0.860219
Signaling pathways regulating pluripotency of stem cells	oas04550	3	141	0.385081	0.860219
MicroRNAs in cancer	oas05206	3	184	0.554485	0.87819
Focal adhesion	oas04510	3	210	0.642444	0.87819
Proteoglycans in cancer	oas05205	3	214	0.654836	0.87819
Linoleic acid metabolism	oas00591	2	35	0.111621	0.531044
Nucleotide excision repair	oas03420	2	43	0.153431	0.674166
Cytosolic DNA-sensing pathway	oas04623	2	58	0.237454	0.860219
Glycerolipid metabolism	oas00561	2	59	0.243181	0.860219
VEGF signaling pathway	oas04370	2	61	0.25465	0.860219
Steroid hormone biosynthesis	oas00140	2	66	0.283344	0.860219
Fc epsilon RI signaling pathway	oas04664	2	66	0.283344	0.860219
Adherens junction	oas04520	2	73	0.323311	0.860219
Arachidonic acid metabolism	oas00590	2	77	0.345907	0.860219
Bacterial invasion of epithelial cells	oas05100	2	80	0.362692	0.860219
Dilated cardiomyopathy	oas05414	2	83	0.379312	0.860219
Insulin secretion	oas04911	2	86	0.395748	0.860219
Prostate cancer	oas05215	2	87	0.401182	0.860219
Apoptosis	oas04210	2	88	0.406594	0.860219
Salmonella infection	oas05132	2	90	0.417345	0.860219
Pancreatic secretion	oas04972	2	100	0.469538	0.860219
Inflammatory mediator regulation of TRP channels	oas04750	2	100	0.469538	0.860219
Rheumatoid arthritis	oas05323	2	100	0.469538	0.860219
Glycerophospholipid metabolism	oas00564	2	101	0.474604	0.860219
Toll-like receptor signaling pathway	oas04620	2	104	0.489624	0.876487
Thyroid hormone signaling pathway	oas04919	2	118	0.556029	0.87819
Leukocyte transendothelial migration	oas04670	2	123	0.578217	0.87819
FoxO signaling pathway	oas04068	2	132	0.616082	0.87819
Hepatitis B	oas05161	2	148	0.676862	0.87819
Adrenergic signaling in cardiomyocytes	oas04261	2	151	0.687346	0.87819
Oxytocin signaling pathway	oas04921	2	157	0.707477	0.87819
cGMP-PKG signaling pathway	oas04022	2	171	0.750263	0.892331
Non-alcoholic fatty liver disease (NAFLD)	oas04932	2	177	0.766892	0.897737
Influenza A	oas05164	2	180	0.77484	0.897737
Tuberculosis	oas05152	2	193	0.806605	0.906649
Folate biosynthesis	oas00790	1	14	0.208504	0.81711
Renin-angiotensin system	oas04614	1	20	0.279206	0.860219
Phenylalanine metabolism	oas00360	1	21	0.290361	0.860219
Maturity onset diabetes of the young	oas04950	1	21	0.290361	0.860219
Steroid biosynthesis	oas00100	1	22	0.301344	0.860219
Proximal tubule bicarbonate reclamation	oas04964	1	22	0.301344	0.860219
Histidine metabolism	oas00340	1	24	0.322805	0.860219
Dorso-ventral axis formation	oas04320	1	25	0.333287	0.860219
Butanoate metabolism	oas00650	1	28	0.363772	0.860219
alpha-Linolenic acid metabolism	oas00592	1	29	0.373622	0.860219
beta-Alanine metabolism	oas00410	1	32	0.402268	0.860219
Circadian rhythm	oas04710	1	32	0.402268	0.860219
Prion diseases	oas05020	1	33	0.411523	0.860219
Tyrosine metabolism	oas00350	1	34	0.420635	0.860219
African trypanosomiasis	oas05143	1	35	0.429607	0.860219
Base excision repair	oas03410	1	36	0.43844	0.860219
Tryptophan metabolism	oas00380	1	44	0.504364	0.87819
Type II diabetes mellitus	oas04930	1	45	0.512042	0.87819
Cocaine addiction	oas05030	1	49	0.541586	0.87819
Ether lipid metabolism	oas00565	1	49	0.541586	0.87819
Fat digestion and absorption	oas04975	1	51	0.555681	0.87819
Fanconi anemia pathway	oas03460	1	51	0.555681	0.87819
NOD-like receptor signaling pathway	oas04621	1	52	0.562566	0.87819
Malaria	oas05144	1	53	0.569345	0.87819
Hedgehog signaling pathway	oas04340	1	53	0.569345	0.87819
Lysine degradation	oas00310	1	54	0.576019	0.87819
ABC transporters	oas02010	1	55	0.582589	0.87819
Basal cell carcinoma	oas05217	1	56	0.589058	0.87819
Ovarian steroidogenesis	oas04913	1	56	0.589058	0.87819
Intestinal immune network for IgA production	oas04672	1	58	0.601698	0.87819
Amyotrophic lateral sclerosis (ALS)	oas05014	1	58	0.601698	0.87819
Glycolysis / Gluconeogenesis	oas00010	1	63	0.631626	0.87819
Pancreatic cancer	oas05212	1	64	0.637337	0.87819
Amphetamine addiction	oas05031	1	67	0.653945	0.87819
Renal cell carcinoma	oas05211	1	68	0.659311	0.87819
PPAR signaling pathway	oas03320	1	70	0.669795	0.87819
Arrhythmogenic right ventricular cardiomyopathy (ARVC)	oas05412	1	70	0.669795	0.87819
Complement and coagulation cascades	oas04610	1	73	0.68492	0.87819
Hypertrophic cardiomyopathy (HCM)	oas05410	1	77	0.704018	0.87819
Pertussis	oas05133	1	77	0.704018	0.87819
Leishmaniasis	oas05140	1	78	0.708609	0.87819
TGF-beta signaling pathway	oas04350	1	78	0.708609	0.87819
Bile secretion	oas04976	1	83	0.730521	0.892331
GnRH signaling pathway	oas04912	1	87	0.746861	0.892331
ErbB signaling pathway	oas04012	1	87	0.746861	0.892331
GABAergic synapse	oas04727	1	88	0.750789	0.892331
Small cell lung cancer	oas05222	1	94	0.773113	0.897737
Circadian entrainment	oas04713	1	96	0.780102	0.897737
Melanogenesis	oas04916	1	101	0.79665	0.906031
Estrogen signaling pathway	oas04915	1	102	0.799807	0.906031
HIF-1 signaling pathway	oas04066	1	109	0.820581	0.912155
Cholinergic synapse	oas04725	1	114	0.834089	0.912155
Oocyte meiosis	oas04114	1	115	0.836666	0.912155
Protein digestion and absorption	oas04974	1	115	0.836666	0.912155
Lysosome	oas04142	1	119	0.846582	0.916078
Vascular smooth muscle contraction	oas04270	1	126	0.862512	0.926402
Toxoplasmosis	oas05145	1	134	0.878707	0.936857
Hippo signaling pathway	oas04390	1	153	0.909948	0.959581
Oxidative phosphorylation	oas00190	1	159	0.918035	0.959581
Parkinson's disease	oas05012	1	166	0.926559	0.959581
RNA transport	oas03013	1	167	0.927702	0.959581
Protein processing in endoplasmic reticulum	oas04141	1	176	0.937225	0.959581
Alcoholism	oas05034	1	181	0.941963	0.959581
Calcium signaling pathway	oas04020	1	186	0.946345	0.959581
Olfactory transduction	oas04740	1	832	0.999998	0.999998

## Sheet: SAT vs TAT
Pathways	Pathway ID	Input number	Background number	p-value	Corrected p-value
Metabolic pathways	oas01100	18	1256	0.963253	0.985091
Staphylococcus aureus infection	oas05150	16	65	6.93273e-12	1.21323e-09
Systemic lupus erythematosus	oas05322	12	145	9.46321e-05	0.00414015
Tuberculosis	oas05152	12	193	0.00107429	0.0376001
Complement and coagulation cascades	oas04610	11	73	1.09476e-06	9.57918e-05
Pertussis	oas05133	10	77	1.1083e-05	0.00064651
Phagosome	oas04145	10	169	0.00381173	0.111175
Jak-STAT signaling pathway	oas04630	9	167	0.0102816	0.257039
Cytokine-cytokine receptor interaction	oas04060	9	235	0.0632457	0.696555
Osteoclast differentiation	oas04380	6	127	0.055085	0.696555
Chemokine signaling pathway	oas04062	6	182	0.186361	0.932393
Endocytosis	oas04144	6	226	0.335325	0.932393
Chronic myeloid leukemia	oas05220	5	75	0.023747	0.519466
Leishmaniasis	oas05140	5	78	0.0273139	0.531103
Hematopoietic cell lineage	oas04640	5	90	0.0448793	0.654489
Inflammatory mediator regulation of TRP channels	oas04750	5	100	0.063685	0.696555
Protein digestion and absorption	oas04974	5	115	0.0989648	0.824707
Chagas disease (American trypanosomiasis)	oas05142	5	115	0.0989648	0.824707
Platelet activation	oas04611	5	134	0.154826	0.932393
Cell adhesion molecules (CAMs)	oas04514	5	156	0.231908	0.932393
Transcriptional misregulation in cancer	oas05202	5	168	0.277836	0.932393
cGMP-PKG signaling pathway	oas04022	5	171	0.289605	0.932393
Purine metabolism	oas00230	5	175	0.305431	0.932393
Influenza A	oas05164	5	180	0.325384	0.932393
Alcoholism	oas05034	5	181	0.329392	0.932393
Calcium signaling pathway	oas04020	5	186	0.349497	0.932393
Proteoglycans in cancer	oas05205	5	214	0.461765	0.932393
Viral carcinogenesis	oas05203	5	220	0.485236	0.932393
HTLV-I infection	oas05166	5	275	0.677292	0.932393
Neuroactive ligand-receptor interaction	oas04080	5	286	0.709398	0.932393
PI3K-Akt signaling pathway	oas04151	5	356	0.861441	0.94575
Type I diabetes mellitus	oas04940	4	59	0.0395191	0.628714
Arachidonic acid metabolism	oas00590	4	77	0.0835311	0.824707
Fc gamma R-mediated phagocytosis	oas04666	4	87	0.115162	0.832321
ErbB signaling pathway	oas04012	4	87	0.115162	0.832321
Rheumatoid arthritis	oas05323	4	100	0.162768	0.932393
Toll-like receptor signaling pathway	oas04620	4	104	0.178662	0.932393
Amoebiasis	oas05146	4	113	0.216151	0.932393
Toxoplasmosis	oas05145	4	134	0.309958	0.932393
Measles	oas05162	4	136	0.319157	0.932393
Insulin signaling pathway	oas04910	4	144	0.356104	0.932393
Epstein-Barr virus infection	oas05169	4	196	0.583791	0.932393
Herpes simplex infection	oas05168	4	213	0.647673	0.932393
Regulation of actin cytoskeleton	oas04810	4	220	0.672011	0.932393
MAPK signaling pathway	oas04010	4	255	0.775974	0.932393
Pathways in cancer	oas05200	4	336	0.917888	0.973518
Prion diseases	oas05020	3	33	0.0365162	0.628714
Graft-versus-host disease	oas05332	3	49	0.0894251	0.824707
Mineral absorption	oas04978	3	50	0.0934272	0.824707
Allograft rejection	oas05330	3	54	0.110144	0.832321
Ovarian steroidogenesis	oas04913	3	56	0.118903	0.832321
Intestinal immune network for IgA production	oas04672	3	58	0.127911	0.860937
VEGF signaling pathway	oas04370	3	61	0.141856	0.919439
Autoimmune thyroid disease	oas05320	3	63	0.151422	0.932393
Fc epsilon RI signaling pathway	oas04664	3	66	0.166139	0.932393
Viral myocarditis	oas05416	3	75	0.212491	0.932393
Inflammatory bowel disease (IBD)	oas05321	3	75	0.212491	0.932393
TGF-beta signaling pathway	oas04350	3	78	0.228522	0.932393
Bacterial invasion of epithelial cells	oas05100	3	80	0.239333	0.932393
Antigen processing and presentation	oas04612	3	82	0.250228	0.932393
GnRH signaling pathway	oas04912	3	87	0.277753	0.932393
NF-kappa B signaling pathway	oas04064	3	89	0.288848	0.932393
Glycerophospholipid metabolism	oas00564	3	101	0.355739	0.932393
Estrogen signaling pathway	oas04915	3	102	0.361299	0.932393
Natural killer cell mediated cytotoxicity	oas04650	3	105	0.377932	0.932393
T cell receptor signaling pathway	oas04660	3	108	0.394472	0.932393
Serotonergic synapse	oas04726	3	109	0.399961	0.932393
TNF signaling pathway	oas04668	3	110	0.405436	0.932393
Leukocyte transendothelial migration	oas04670	3	123	0.474989	0.932393
Vascular smooth muscle contraction	oas04270	3	126	0.490519	0.932393
AMPK signaling pathway	oas04152	3	126	0.490519	0.932393
Dopaminergic synapse	oas04728	3	131	0.515889	0.932393
Hepatitis C	oas05160	3	132	0.520882	0.932393
Hepatitis B	oas05161	3	148	0.596714	0.932393
Ubiquitin mediated proteolysis	oas04120	3	149	0.601186	0.932393
Adrenergic signaling in cardiomyocytes	oas04261	3	151	0.610033	0.932393
Hippo signaling pathway	oas04390	3	153	0.618747	0.932393
MicroRNAs in cancer	oas05206	3	184	0.736656	0.932393
Rap1 signaling pathway	oas04015	3	212	0.816565	0.940356
cAMP signaling pathway	oas04024	3	216	0.826118	0.940356
Glycosaminoglycan biosynthesis - chondroitin sulfate / dermatan sulfate	oas00532	2	18	0.0618014	0.696555
Asthma	oas05310	2	39	0.203217	0.932393
Cocaine addiction	oas05030	2	49	0.278683	0.932393
NOD-like receptor signaling pathway	oas04621	2	52	0.301366	0.932393
Malaria	oas05144	2	53	0.308903	0.932393
Acute myeloid leukemia	oas05221	2	58	0.34629	0.932393
Drug metabolism - cytochrome P450	oas00982	2	60	0.361066	0.932393
Retinol metabolism	oas00830	2	61	0.368407	0.932393
Metabolism of xenobiotics by cytochrome P450	oas00980	2	62	0.375715	0.932393
Glioma	oas05214	2	63	0.382988	0.932393
Amphetamine addiction	oas05031	2	67	0.411699	0.932393
Thyroid hormone synthesis	oas04918	2	70	0.432794	0.932393
Chemical carcinogenesis	oas05204	2	73	0.453477	0.932393
Legionellosis	oas05134	2	75	0.467024	0.932393
RIG-I-like receptor signaling pathway	oas04622	2	76	0.473722	0.932393
Prolactin signaling pathway	oas04917	2	82	0.512815	0.932393
Insulin secretion	oas04911	2	86	0.537793	0.932393
Prostate cancer	oas05215	2	87	0.543898	0.932393
ECM-receptor interaction	oas04512	2	89	0.555939	0.932393
Salivary secretion	oas04970	2	90	0.561875	0.932393
Salmonella infection	oas05132	2	90	0.561875	0.932393
Progesterone-mediated oocyte maturation	oas04914	2	93	0.579338	0.932393
Morphine addiction	oas05032	2	93	0.579338	0.932393
Melanogenesis	oas04916	2	101	0.623385	0.932393
Retrograde endocannabinoid signaling	oas04723	2	104	0.638958	0.932393
Glutamatergic synapse	oas04724	2	113	0.682636	0.932393
Cholinergic synapse	oas04725	2	114	0.687213	0.932393
Lysosome	oas04142	2	119	0.709288	0.932393
Neurotrophin signaling pathway	oas04722	2	123	0.725998	0.932393
Axon guidance	oas04360	2	127	0.741889	0.932393
FoxO signaling pathway	oas04068	2	132	0.760638	0.932393
Cell cycle	oas04110	2	134	0.767801	0.932393
Tight junction	oas04530	2	135	0.771313	0.932393
Oxytocin signaling pathway	oas04921	2	157	0.837602	0.940356
Protein processing in endoplasmic reticulum	oas04141	2	176	0.880312	0.950954
Huntington's disease	oas05016	2	208	0.929557	0.976534
Focal adhesion	oas04510	2	210	0.931892	0.976534
Ras signaling pathway	oas04014	2	233	0.953978	0.984754
Glycosphingolipid biosynthesis - globo series	oas00603	1	15	0.280636	0.932393
Pantothenate and CoA biosynthesis	oas00770	1	18	0.323736	0.932393
Phenylalanine metabolism	oas00360	1	21	0.364258	0.932393
Ascorbate and aldarate metabolism	oas00053	1	23	0.389917	0.932393
Histidine metabolism	oas00340	1	24	0.402357	0.932393
Nicotinate and nicotinamide metabolism	oas00760	1	25	0.414543	0.932393
alpha-Linolenic acid metabolism	oas00592	1	29	0.460857	0.932393
beta-Alanine metabolism	oas00410	1	32	0.493177	0.932393
Circadian rhythm	oas04710	1	32	0.493177	0.932393
Primary immunodeficiency	oas05340	1	33	0.503514	0.932393
Tyrosine metabolism	oas00350	1	34	0.513642	0.932393
Linoleic acid metabolism	oas00591	1	35	0.523563	0.932393
African trypanosomiasis	oas05143	1	35	0.523563	0.932393
Alanine, aspartate and glutamate metabolism	oas00250	1	36	0.533281	0.932393
Bladder cancer	oas05219	1	36	0.533281	0.932393
Pyruvate metabolism	oas00620	1	41	0.578987	0.932393
Glycine, serine and threonine metabolism	oas00260	1	42	0.587578	0.932393
Nucleotide excision repair	oas03420	1	43	0.595993	0.932393
Vasopressin-regulated water reabsorption	oas04962	1	47	0.627976	0.932393
Sphingolipid metabolism	oas00600	1	47	0.627976	0.932393
Amino sugar and nucleotide sugar metabolism	oas00520	1	48	0.635568	0.932393
Ether lipid metabolism	oas00565	1	49	0.643006	0.932393
Fat digestion and absorption	oas04975	1	51	0.657431	0.932393
Non-small cell lung cancer	oas05223	1	54	0.677984	0.932393
Lysine degradation	oas00310	1	54	0.677984	0.932393
ABC transporters	oas02010	1	55	0.684558	0.932393
Cytosolic DNA-sensing pathway	oas04623	1	58	0.703486	0.932393
Amyotrophic lateral sclerosis (ALS)	oas05014	1	58	0.703486	0.932393
Long-term depression	oas04730	1	59	0.709541	0.932393
Glycerolipid metabolism	oas00561	1	59	0.709541	0.932393
Glycolysis / Gluconeogenesis	oas00010	1	63	0.732548	0.932393
Pancreatic cancer	oas05212	1	64	0.73801	0.932393
Arginine and proline metabolism	oas00330	1	64	0.73801	0.932393
Steroid hormone biosynthesis	oas00140	1	66	0.748602	0.932393
mTOR signaling pathway	oas04150	1	66	0.748602	0.932393
B cell receptor signaling pathway	oas04662	1	69	0.763694	0.932393
Melanoma	oas05218	1	69	0.763694	0.932393
Gastric acid secretion	oas04971	1	72	0.777882	0.932393
Adipocytokine signaling pathway	oas04920	1	74	0.786865	0.936744
Ribosome biogenesis in eukaryotes	oas03008	1	80	0.811696	0.940356
Phosphatidylinositol signaling system	oas04070	1	80	0.811696	0.940356
Bile secretion	oas04976	1	83	0.823006	0.940356
Dilated cardiomyopathy	oas05414	1	83	0.823006	0.940356
Apoptosis	oas04210	1	88	0.84037	0.940356
GABAergic synapse	oas04727	1	88	0.84037	0.940356
Gap junction	oas04540	1	89	0.843633	0.940356
Small cell lung cancer	oas05222	1	94	0.858977	0.94575
Circadian entrainment	oas04713	1	96	0.864685	0.94575
Pancreatic secretion	oas04972	1	100	0.875419	0.950954
Oocyte meiosis	oas04114	1	115	0.908631	0.973518
Thyroid hormone signaling pathway	oas04919	1	118	0.914126	0.973518
Signaling pathways regulating pluripotency of stem cells	oas04550	1	141	0.946641	0.984754
Spliceosome	oas03040	1	151	0.956618	0.984754
Parkinson's disease	oas05012	1	166	0.968204	0.985091
Non-alcoholic fatty liver disease (NAFLD)	oas04932	1	177	0.974685	0.985953
Alzheimer's disease	oas05010	1	192	0.981451	0.987092
Ribosome	oas03010	1	240	0.993152	0.993152

## Sheet: VAT vs. TAT
Pathways	Pathway ID	Input number	Background number	p-value	Corrected p-value
Metabolic pathways	oas01100	46	1256	0.999999	0.999999
Cytokine-cytokine receptor interaction	oas04060	34	235	0.000136886	0.00615988
PI3K-Akt signaling pathway	oas04151	33	356	0.0657211	0.434919
HTLV-I infection	oas05166	31	275	0.00868785	0.0849899
Rap1 signaling pathway	oas04015	27	212	0.00331319	0.0438511
Pathways in cancer	oas05200	27	336	0.247345	0.818423
Chemokine signaling pathway	oas04062	26	182	0.00093543	0.0210472
Tuberculosis	oas05152	25	193	0.00377441	0.0471802
Phagosome	oas04145	24	169	0.00154521	0.0243581
Cell adhesion molecules (CAMs)	oas04514	23	156	0.00123617	0.0231782
Hematopoietic cell lineage	oas04640	22	90	2.39697e-06	0.000269659
Transcriptional misregulation in cancer	oas05202	22	168	0.00563771	0.0604041
Ras signaling pathway	oas04014	22	233	0.100932	0.540705
Antigen processing and presentation	oas04612	21	82	2.1568e-06	0.000269659
Natural killer cell mediated cytotoxicity	oas04650	21	105	5.46607e-05	0.00307467
cAMP signaling pathway	oas04024	21	216	0.0871625	0.540421
Proteoglycans in cancer	oas05205	20	214	0.121274	0.580569
Regulation of actin cytoskeleton	oas04810	20	220	0.144462	0.625075
Focal adhesion	oas04510	19	210	0.156082	0.637965
Endocytosis	oas04144	19	226	0.234128	0.810444
T cell receptor signaling pathway	oas04660	18	108	0.00121361	0.0231782
cGMP-PKG signaling pathway	oas04022	18	171	0.0631398	0.434919
Calcium signaling pathway	oas04020	18	186	0.109921	0.549605
Staphylococcus aureus infection	oas05150	17	65	1.55525e-05	0.00116644
Influenza A	oas05164	17	180	0.135613	0.61026
Herpes simplex infection	oas05168	17	213	0.31533	0.955829
Complement and coagulation cascades	oas04610	16	73	0.000165362	0.00620108
Inflammatory bowel disease (IBD)	oas05321	16	75	0.000216057	0.00694467
Measles	oas05162	16	136	0.0364269	0.283838
Jak-STAT signaling pathway	oas04630	16	167	0.133282	0.61026
Leishmaniasis	oas05140	15	78	0.000864373	0.0210472
MAPK signaling pathway	oas04010	15	255	0.760413	0.999999
Viral myocarditis	oas05416	14	75	0.00162388	0.0243581
Rheumatoid arthritis	oas05323	14	100	0.0150016	0.135015
Chagas disease (American trypanosomiasis)	oas05142	14	115	0.0387095	0.290321
Toxoplasmosis	oas05145	14	134	0.0966882	0.540705
Fc gamma R-mediated phagocytosis	oas04666	13	87	0.0119771	0.112286
Leukocyte transendothelial migration	oas04670	13	123	0.100269	0.540705
Axon guidance	oas04360	13	127	0.118291	0.578597
Platelet activation	oas04611	13	134	0.153997	0.637965
Systemic lupus erythematosus	oas05322	13	145	0.219939	0.785498
Hepatitis B	oas05161	13	148	0.239739	0.812193
Estrogen signaling pathway	oas04915	12	102	0.0638064	0.434919
Toll-like receptor signaling pathway	oas04620	12	104	0.0708395	0.455397
Osteoclast differentiation	oas04380	12	127	0.186188	0.710038
Graft-versus-host disease	oas05332	11	49	0.00141823	0.0243581
Allograft rejection	oas05330	11	54	0.00275884	0.0387962
Intestinal immune network for IgA production	oas04672	11	58	0.00444423	0.0526291
Type I diabetes mellitus	oas04940	11	59	0.0049725	0.0559406
Autoimmune thyroid disease	oas05320	11	63	0.00760013	0.0777286
Pertussis	oas05133	11	77	0.0257916	0.223196
Melanogenesis	oas04916	11	101	0.107297	0.548678
Hippo signaling pathway	oas04390	11	153	0.491001	0.999999
Oxytocin signaling pathway	oas04921	11	157	0.523628	0.999999
Purine metabolism	oas00230	11	175	0.659778	0.999999
Epstein-Barr virus infection	oas05169	11	196	0.78675	0.999999
Viral carcinogenesis	oas05203	11	220	0.885466	0.999999
Neuroactive ligand-receptor interaction	oas04080	11	286	0.985985	0.999999
Primary immunodeficiency	oas05340	10	33	0.000325713	0.00916068
Gap junction	oas04540	10	89	0.105238	0.548678
Inflammatory mediator regulation of TRP channels	oas04750	10	100	0.171864	0.666714
Cholinergic synapse	oas04725	10	114	0.278208	0.894239
Adrenergic signaling in cardiomyocytes	oas04261	10	151	0.59478	0.999999
B cell receptor signaling pathway	oas04662	9	69	0.0631923	0.434919
Legionellosis	oas05134	9	75	0.0912711	0.540421
Dilated cardiomyopathy	oas05414	9	83	0.138402	0.610595
Insulin secretion	oas04911	9	86	0.158782	0.637965
ErbB signaling pathway	oas04012	9	87	0.165882	0.654796
TNF signaling pathway	oas04668	9	110	0.360184	0.999999
Neurotrophin signaling pathway	oas04722	9	123	0.480916	0.999999
AMPK signaling pathway	oas04152	9	126	0.508252	0.999999
Non-alcoholic fatty liver disease (NAFLD)	oas04932	9	177	0.854076	0.999999
MicroRNAs in cancer	oas05206	9	184	0.881087	0.999999
Bacterial invasion of epithelial cells	oas05100	8	80	0.206364	0.758258
NF-kappa B signaling pathway	oas04064	8	89	0.287843	0.912178
Salivary secretion	oas04970	8	90	0.297383	0.929322
HIF-1 signaling pathway	oas04066	8	109	0.484592	0.999999
Amoebiasis	oas05146	8	113	0.523134	0.999999
Signaling pathways regulating pluripotency of stem cells	oas04550	8	141	0.7518	0.999999
Asthma	oas05310	7	39	0.0268975	0.224146
Glycine, serine and threonine metabolism	oas00260	7	42	0.0365836	0.283838
Malaria	oas05144	7	53	0.0902507	0.540421
Acute myeloid leukemia	oas05221	7	58	0.124295	0.582632
VEGF signaling pathway	oas04370	7	61	0.147437	0.625911
Fc epsilon RI signaling pathway	oas04664	7	66	0.190064	0.712739
Thyroid hormone synthesis	oas04918	7	70	0.227311	0.799139
Salmonella infection	oas05132	7	90	0.435866	0.999999
Morphine addiction	oas05032	7	93	0.467707	0.999999
Circadian entrainment	oas04713	7	96	0.499098	0.999999
Protein digestion and absorption	oas04974	7	115	0.678446	0.999999
FoxO signaling pathway	oas04068	7	132	0.799559	0.999999
Wnt signaling pathway	oas04310	7	141	0.847825	0.999999
Nucleotide excision repair	oas03420	6	43	0.0937399	0.540705
Basal cell carcinoma	oas05217	6	56	0.208942	0.758258
Amphetamine addiction	oas05031	6	67	0.33088	0.968824
Arrhythmogenic right ventricular cardiomyopathy (ARVC)	oas05412	6	70	0.36586	0.999999
Adipocytokine signaling pathway	oas04920	6	74	0.412689	0.999999
Arachidonic acid metabolism	oas00590	6	77	0.447593	0.999999
Bile secretion	oas04976	6	83	0.515783	0.999999
Prostate cancer	oas05215	6	87	0.559386	0.999999
Apoptosis	oas04210	6	88	0.569997	0.999999
GABAergic synapse	oas04727	6	88	0.569997	0.999999
ECM-receptor interaction	oas04512	6	89	0.580481	0.999999
Progesterone-mediated oocyte maturation	oas04914	6	93	0.621066	0.999999
Pancreatic secretion	oas04972	6	100	0.686367	0.999999
Carbon metabolism	oas01200	6	109	0.75876	0.999999
Thyroid hormone signaling pathway	oas04919	6	118	0.818069	0.999999
Vascular smooth muscle contraction	oas04270	6	126	0.860541	0.999999
Dopaminergic synapse	oas04728	6	131	0.882671	0.999999
Hepatitis C	oas05160	6	132	0.886722	0.999999
Tight junction	oas04530	6	135	0.898171	0.999999
Insulin signaling pathway	oas04910	6	144	0.926745	0.999999
Alcoholism	oas05034	6	181	0.983395	0.999999
Cocaine addiction	oas05030	5	49	0.267629	0.872702
Hedgehog signaling pathway	oas04340	5	53	0.31861	0.955829
Non-small cell lung cancer	oas05223	5	54	0.331553	0.968824
Ovarian steroidogenesis	oas04913	5	56	0.357565	0.999999
Glycerolipid metabolism	oas00561	5	59	0.396665	0.999999
Glioma	oas05214	5	63	0.448364	0.999999
PPAR signaling pathway	oas03320	5	70	0.535509	0.999999
Colorectal cancer	oas05210	5	70	0.535509	0.999999
Gastric acid secretion	oas04971	5	72	0.559254	0.999999
Chemical carcinogenesis	oas05204	5	73	0.570896	0.999999
Biosynthesis of amino acids	oas01230	5	75	0.593688	0.999999
GnRH signaling pathway	oas04912	5	87	0.715012	0.999999
Glycerophospholipid metabolism	oas00564	5	101	0.821104	0.999999
Retrograde endocannabinoid signaling	oas04723	5	104	0.839119	0.999999
Glutamatergic synapse	oas04724	5	113	0.884387	0.999999
Lysosome	oas04142	5	119	0.908099	0.999999
Parkinson's disease	oas05012	5	166	0.987565	0.999999
Huntington's disease	oas05016	5	208	0.998328	0.999999
African trypanosomiasis	oas05143	4	35	0.241853	0.812193
Vasopressin-regulated water reabsorption	oas04962	4	47	0.419231	0.999999
Amino sugar and nucleotide sugar metabolism	oas00520	4	48	0.43393	0.999999
NOD-like receptor signaling pathway	oas04621	4	52	0.491514	0.999999
Metabolism of xenobiotics by cytochrome P450	oas00980	4	62	0.622728	0.999999
Pancreatic cancer	oas05212	4	64	0.646254	0.999999
mTOR signaling pathway	oas04150	4	66	0.668789	0.999999
Melanoma	oas05218	4	69	0.7007	0.999999
Chronic myeloid leukemia	oas05220	4	75	0.757709	0.999999
Hypertrophic cardiomyopathy (HCM)	oas05410	4	77	0.774732	0.999999
TGF-beta signaling pathway	oas04350	4	78	0.782883	0.999999
Phosphatidylinositol signaling system	oas04070	4	80	0.798479	0.999999
Prolactin signaling pathway	oas04917	4	82	0.813156	0.999999
Serotonergic synapse	oas04726	4	109	0.938486	0.999999
Oocyte meiosis	oas04114	4	115	0.952853	0.999999
Ubiquitin mediated proteolysis	oas04120	4	149	0.990519	0.999999
Protein processing in endoplasmic reticulum	oas04141	4	176	0.997576	0.999999
Glyoxylate and dicarboxylate metabolism	oas00630	3	27	0.304835	0.93956
Circadian rhythm	oas04710	3	32	0.394724	0.999999
Prion diseases	oas05020	3	33	0.412419	0.999999
Linoleic acid metabolism	oas00591	3	35	0.447282	0.999999
Cysteine and methionine metabolism	oas00270	3	40	0.530318	0.999999
Carbohydrate digestion and absorption	oas04973	3	43	0.576642	0.999999
Endocrine and other factor-regulated calcium reabsorption	oas04961	3	44	0.591431	0.999999
Starch and sucrose metabolism	oas00500	3	49	0.660207	0.999999
Endometrial cancer	oas05213	3	52	0.697251	0.999999
Cytosolic DNA-sensing pathway	oas04623	3	58	0.761983	0.999999
Retinol metabolism	oas00830	3	61	0.789883	0.999999
Glycolysis / Gluconeogenesis	oas00010	3	63	0.806931	0.999999
Steroid hormone biosynthesis	oas00140	3	66	0.830304	0.999999
Renal cell carcinoma	oas05211	3	68	0.8445	0.999999
Adherens junction	oas04520	3	73	0.875555	0.999999
Small cell lung cancer	oas05222	3	94	0.953881	0.999999
Alzheimer's disease	oas05010	3	192	0.999772	0.999999
2-Oxocarboxylic acid metabolism	oas01210	2	17	0.349075	0.999999
Terpenoid backbone biosynthesis	oas00900	2	21	0.441934	0.999999
Steroid biosynthesis	oas00100	2	22	0.464012	0.999999
Nicotinate and nicotinamide metabolism	oas00760	2	25	0.527005	0.999999
Butanoate metabolism	oas00650	2	28	0.584783	0.999999
Alanine, aspartate and glutamate metabolism	oas00250	2	36	0.712714	0.999999
Taste transduction	oas04742	2	36	0.712714	0.999999
Aldosterone-regulated sodium reabsorption	oas04960	2	39	0.751388	0.999999
Type II diabetes mellitus	oas04930	2	45	0.815404	0.999999
Sphingolipid metabolism	oas00600	2	47	0.833217	0.999999
Valine, leucine and isoleucine degradation	oas00280	2	47	0.833217	0.999999
Fatty acid metabolism	oas01212	2	48	0.841528	0.999999
Long-term depression	oas04730	2	59	0.910993	0.999999
Drug metabolism - cytochrome P450	oas00982	2	60	0.91564	0.999999
Inositol phosphate metabolism	oas00562	2	61	0.920057	0.999999
RIG-I-like receptor signaling pathway	oas04622	2	76	0.964967	0.999999
Peroxisome	oas04146	2	84	0.977699	0.999999
RNA transport	oas03013	2	167	0.999843	0.999999
Sulfur relay system	oas04122	1	9	0.486563	0.999999
Synthesis and degradation of ketone bodies	oas00072	1	11	0.550664	0.999999
Riboflavin metabolism	oas00740	1	12	0.579649	0.999999
Fatty acid biosynthesis	oas00061	1	13	0.606766	0.999999
Folate biosynthesis	oas00790	1	14	0.632135	0.999999
Glycosphingolipid biosynthesis - globo series	oas00603	1	15	0.655867	0.999999
Sulfur metabolism	oas00920	1	17	0.698841	0.999999
Pantothenate and CoA biosynthesis	oas00770	1	18	0.718272	0.999999
One carbon pool by folate	oas00670	1	19	0.736451	0.999999
Phenylalanine metabolism	oas00360	1	21	0.769366	0.999999
Glycosaminoglycan degradation	oas00531	1	22	0.784249	0.999999
Mismatch repair	oas03430	1	22	0.784249	0.999999
Glycosaminoglycan biosynthesis - heparan sulfate / heparin	oas00534	1	24	0.811198	0.999999
Histidine metabolism	oas00340	1	24	0.811198	0.999999
Propanoate metabolism	oas00640	1	28	0.855422	0.999999
alpha-Linolenic acid metabolism	oas00592	1	29	0.864754	0.999999
Pentose phosphate pathway	oas00030	1	30	0.873485	0.999999
Thyroid cancer	oas05216	1	31	0.881652	0.999999
beta-Alanine metabolism	oas00410	1	32	0.889292	0.999999
Citrate cycle (TCA cycle)	oas00020	1	33	0.896439	0.999999
Tyrosine metabolism	oas00350	1	34	0.903125	0.999999
DNA replication	oas03030	1	36	0.915231	0.999999
Base excision repair	oas03410	1	36	0.915231	0.999999
Bladder cancer	oas05219	1	36	0.915231	0.999999
Drug metabolism - other enzymes	oas00983	1	38	0.925824	0.999999
Pyruvate metabolism	oas00620	1	41	0.939286	0.999999
Fatty acid degradation	oas00071	1	43	0.946875	0.999999
Ether lipid metabolism	oas00565	1	49	0.964412	0.999999
Mineral absorption	oas04978	1	50	0.966711	0.999999
Fat digestion and absorption	oas04975	1	51	0.968861	0.999999
Notch signaling pathway	oas04330	1	52	0.970873	0.999999
Glutathione metabolism	oas00480	1	53	0.972755	0.999999
ABC transporters	oas02010	1	55	0.976162	0.999999
Amyotrophic lateral sclerosis (ALS)	oas05014	1	58	0.980491	0.999999
Arginine and proline metabolism	oas00330	1	64	0.986934	0.999999
Long-term potentiation	oas04720	1	67	0.989307	0.999999
RNA degradation	oas03018	1	76	0.994141	0.999999
p53 signaling pathway	oas04115	1	78	0.994874	0.999999
Cardiac muscle contraction	oas04260	1	84	0.996568	0.999999
Cell cycle	oas04110	1	134	0.999879	0.999999
Spliceosome	oas03040	1	151	0.999961	0.999999
Oxidative phosphorylation	oas00190	1	159	0.999977	0.999999
