# Supplementary material for: Comparative transcriptome analysis reveals potentially novel roles of Homeobox genes in adipose deposition in fat-tailed sheep
Source: Sci Rep. 2017 Nov 3;7:14491. doi: 10.1038/s41598-017-14967-9 (PMC5670210; doi:10.1038/s41598-017-14967-9)
Supplement: Supplementary file 8 — Dataset 7 [file 41598_2017_14967_MOESM8_ESM.xlsx]

## Sheet: subcluster1
Supplementary Table S7. List of genes with different expressions in six subclusters.
Gene_ID	SAT	VAT	TAT	Gene_Symbol	Description
ENSOARG00000017168	3212.45	1839.77	3873.7	FASN	fatty acid synthase [Source:HGNC Symbol;Acc:HGNC:3594]
ENSOARG00000002937	2875.47	1243.26	2793.17	-	Uncharacterized protein [Source:UniProtKB/TrEMBL;Acc:W5NY70]
ENSOARG00000010787	1984.81	1237.01	2451.27	ACSS2	acyl-CoA synthetase short-chain family member 2 [Source:HGNC Symbol;Acc:HGNC:15814]
ENSOARG00000018232	1941.17	1332.35	2394.7	-	Carboxylic ester hydrolase [Source:UniProtKB/TrEMBL;Acc:W5QA37]
ENSOARG00000000033	1744.73	710.314	2223.65	ND6	NADH-ubiquinone oxidoreductase chain 6 [Source:UniProtKB/Swiss-Prot;Acc:O78757]
ENSOARG00000012490	1294.62	808.037	1827.39	DBI	diazepam binding inhibitor (GABA receptor modulator, acyl-CoA binding protein) [Source:HGNC Symbol;Acc:HGNC:2690]
ENSOARG00000004502	1305.37	905.792	1726.69	GPI	glucose-6-phosphate isomerase [Source:HGNC Symbol;Acc:HGNC:4458]
ENSOARG00000019235	560.687	320.359	950.53	MID1IP1	MID1 interacting protein 1 [Source:HGNC Symbol;Acc:HGNC:20715]
ENSOARG00000014939	321.803	340.151	783.489	CLDN15	claudin 15 [Source:HGNC Symbol;Acc:HGNC:2036]
ENSOARG00000004871	479.479	344.554	772.944	COL1A1	collagen, type I, alpha 1 [Source:HGNC Symbol;Acc:HGNC:2197]
ENSOARG00000016771	158.027	145.391	389.234	-	Uncharacterized protein [Source:UniProtKB/TrEMBL;Acc:W5Q5L8]
ENSOARG00000017468	244.811	173.933	386.928	EPHX1	epoxide hydrolase 1, microsomal (xenobiotic) [Source:HGNC Symbol;Acc:HGNC:3401]
ENSOARG00000004414	201.442	133.416	347.259	CEBPA	CCAAT/enhancer binding protein (C/EBP), alpha [Source:HGNC Symbol;Acc:HGNC:1833]
ENSOARG00000019145	170.955	162.846	301.995	TST	thiosulfate sulfurtransferase (rhodanese) [Source:HGNC Symbol;Acc:HGNC:12388]
ENSOARG00000014198	154.212	127.29	247.633	GCAT	glycine C-acetyltransferase [Source:HGNC Symbol;Acc:HGNC:4188]
ENSOARG00000004800	146.14	79.6661	245.654	EEPD1	endonuclease/exonuclease/phosphatase family domain containing 1 [Source:HGNC Symbol;Acc:HGNC:22223]
ENSOARG00000008341	336.852	107.757	242.821	MTURN	maturin, neural progenitor differentiation regulator homolog (Xenopus) [Source:HGNC Symbol;Acc:HGNC:25457]
Novel01869	235.354	110.668	240.229
ENSOARG00000009969	145.516	103.461	197.013	UBE2L6	ubiquitin-conjugating enzyme E2L 6 [Source:HGNC Symbol;Acc:HGNC:12490]
ENSOARG00000015250	150.919	88.2928	175.405	FDFT1	farnesyl-diphosphate farnesyltransferase 1 [Source:HGNC Symbol;Acc:HGNC:3629]
ENSOARG00000013010	107.411	61.4963	174.939	MVD	mevalonate (diphospho) decarboxylase [Source:HGNC Symbol;Acc:HGNC:7529]
ENSOARG00000013647	81.5724	81.6695	160.323	ACAD8	acyl-CoA dehydrogenase family, member 8 [Source:HGNC Symbol;Acc:HGNC:87]
ENSOARG00000020204	142.457	69.1103	157.49	CMAS	cytidine monophosphate N-acetylneuraminic acid synthetase [Source:HGNC Symbol;Acc:HGNC:18290]
ENSOARG00000018980	149.332	72.3409	147.306	IDH1	isocitrate dehydrogenase 1 (NADP+), soluble [Source:HGNC Symbol;Acc:HGNC:5382]
ENSOARG00000002033	108.704	75.0983	146.832	NADK	NAD kinase [Source:HGNC Symbol;Acc:HGNC:29831]
ENSOARG00000017489	96.3999	25.0244	143.16	AACS	acetoacetyl-CoA synthetase [Source:HGNC Symbol;Acc:HGNC:21298]
ENSOARG00000006526	111.075	76.5564	142.164	AKT2	v-akt murine thymoma viral oncogene homolog 2 [Source:HGNC Symbol;Acc:HGNC:392]
ENSOARG00000001504	94.8869	56.9886	130.733	SREBF1	sterol regulatory element binding transcription factor 1 [Source:HGNC Symbol;Acc:HGNC:11289]
ENSOARG00000002555	110.521	65.9402	125.155	LGALS12	lectin, galactoside-binding, soluble, 12 [Source:HGNC Symbol;Acc:HGNC:15788]
ENSOARG00000007493	60.7524	20.9255	111.413	DHCR24	24-dehydrocholesterol reductase [Source:HGNC Symbol;Acc:HGNC:2859]
ENSOARG00000001159	65.9234	58.9666	107.937	MMP15	matrix metallopeptidase 15 (membrane-inserted) [Source:HGNC Symbol;Acc:HGNC:7161]
Novel02278	39.7758	8.85755	104.346
Novel00880	78.8098	54.8096	100.842
ENSOARG00000017474	43.3144	39.7661	86.204	JUP	junction plakoglobin [Source:HGNC Symbol;Acc:HGNC:6207]
Novel02018	40.8601	36.4094	81.7078
ENSOARG00000017906	33.869	31.9527	80.6126	PCYT2	phosphate cytidylyltransferase 2, ethanolamine [Source:HGNC Symbol;Acc:HGNC:8756]
ENSOARG00000017707	56.6144	31.5145	79.8569	BRI3BP	BRI3 binding protein [Source:HGNC Symbol;Acc:HGNC:14251]
ENSOARG00000001264	49.5676	31.503	76.816	-	Uncharacterized protein [Source:UniProtKB/TrEMBL;Acc:W5NT28]
ENSOARG00000011865	46.5238	28.7137	73.5316	ERBB2	erb-b2 receptor tyrosine kinase 2 [Source:HGNC Symbol;Acc:HGNC:3430]
ENSOARG00000013744	32.6755	22.1304	72.8205	-	Uncharacterized protein [Source:UniProtKB/TrEMBL;Acc:W5PWA6]
ENSOARG00000005646	39.2619	30.372	67.5103	GLYCTK	glycerate kinase [Source:HGNC Symbol;Acc:HGNC:24247]
ENSOARG00000017973	58.5298	34.1172	64.1592	AZGP1	alpha-2-glycoprotein 1, zinc-binding [Source:HGNC Symbol;Acc:HGNC:910]
Novel00784	30.1633	23.6154	59.8774
ENSOARG00000012667	31.4464	25.7857	56.9234	NFIC	nuclear factor I/C (CCAAT-binding transcription factor) [Source:HGNC Symbol;Acc:HGNC:7786]
ENSOARG00000013151	20.1709	16.1555	55.1024	MST1	macrophage stimulating 1 [Source:HGNC Symbol;Acc:HGNC:7380]
ENSOARG00000019246	48.1986	29.4027	54.5515	PNPLA3	patatin-like phospholipase domain containing 3 [Source:HGNC Symbol;Acc:HGNC:18590]
ENSOARG00000008534	25.2896	21.0723	52.218	PRRX2	paired related homeobox 2 [Source:HGNC Symbol;Acc:HGNC:21338]
ENSOARG00000017550	39.6248	22.461	52.1391	-	Uncharacterized protein [Source:UniProtKB/TrEMBL;Acc:W5Q7Z1]
ENSOARG00000010184	56.9459	26.4078	49.5001	AK4	adenylate kinase 4 [Source:HGNC Symbol;Acc:HGNC:363]
Novel01974	44.2483	23.2692	48.0577
Novel02021	26.9653	18.3477	47.2509
ENSOARG00000004464	28.113	19.1	43.5541	KCTD15	potassium channel tetramerization domain containing 15 [Source:HGNC Symbol;Acc:HGNC:23297]
ENSOARG00000002386	29.9727	16.8148	42.5557	CRY2	cryptochrome circadian clock 2 [Source:HGNC Symbol;Acc:HGNC:2385]
ENSOARG00000013022	31.4032	15.662	42.2228	TMEM182	transmembrane protein 182 [Source:HGNC Symbol;Acc:HGNC:26391]
ENSOARG00000008361	26.8782	21.1934	42.0743	ARSD	arylsulfatase D [Source:HGNC Symbol;Acc:HGNC:717]
Novel00191	39.8537	19.7768	38.7743
ENSOARG00000011056	12.7454	5.60427	37.8369	IRX5	iroquois homeobox 5 [Source:HGNC Symbol;Acc:HGNC:14361]
ENSOARG00000014824	19.3317	19.5671	37.7665	MVK	mevalonate kinase [Source:HGNC Symbol;Acc:HGNC:7530]
ENSOARG00000006108	30.0333	18.7228	34.2678	PALD1	phosphatase domain containing, paladin 1 [Source:HGNC Symbol;Acc:HGNC:23530]
ENSOARG00000025903	23.7757	15.9075	33.8107
ENSOARG00000015775	28.311	6.77834	32.1783	GPT2	glutamic pyruvate transaminase (alanine aminotransferase) 2 [Source:HGNC Symbol;Acc:HGNC:18062]
ENSOARG00000025707	14.6881	13.5738	28.9708
ENSOARG00000021001	23.3493	8.6408	28.9177	FGF7	fibroblast growth factor 7 [Source:HGNC Symbol;Acc:HGNC:3685]
ENSOARG00000018110	25.1136	13.3115	28.8424	DBT	dihydrolipoamide branched chain transacylase E2 [Source:HGNC Symbol;Acc:HGNC:2698]
ENSOARG00000002366	23.7103	13.23	28.251	RXRA	retinoid X receptor, alpha [Source:HGNC Symbol;Acc:HGNC:10477]
ENSOARG00000011565	17.6655	11.4739	25.9234	LIG1	ligase I, DNA, ATP-dependent [Source:HGNC Symbol;Acc:HGNC:6598]
ENSOARG00000018548	16.0539	9.85199	25.698	SHMT1	serine hydroxymethyltransferase 1 (soluble) [Source:HGNC Symbol;Acc:HGNC:10850]
ENSOARG00000006817	29.3589	10.0702	23.4201	-	Uncharacterized protein [Source:UniProtKB/TrEMBL;Acc:W5PA44]
ENSOARG00000020186	8.74925	8.02465	22.8695	ADCY5	adenylate cyclase 5 [Source:HGNC Symbol;Acc:HGNC:236]
ENSOARG00000026213	10.514	10.9784	22.3698
ENSOARG00000011128	12.7879	7.4501	20.5919	-	Cystathionine beta-synthase [Source:UniProtKB/TrEMBL;Acc:W5PNA9]
Novel00829	4.33184	0.202448	20.5687
ENSOARG00000011352	14.7111	10.2559	20.311	MST1R	macrophage stimulating 1 receptor [Source:HGNC Symbol;Acc:HGNC:7381]
ENSOARG00000005781	4.23565	0.280195	20.2176	IRX1	iroquois homeobox 1 [Source:HGNC Symbol;Acc:HGNC:14358]
ENSOARG00000000322	9.07047	8.21981	20.0723	MIEF2	mitochondrial elongation factor 2 [Source:HGNC Symbol;Acc:HGNC:17920]
ENSOARG00000016636	8.56313	8.12498	19.3911	FBXO24	F-box protein 24 [Source:HGNC Symbol;Acc:HGNC:13595]
ENSOARG00000020376	23.2312	0.19082	18.6034	TBX15	T-box 15 [Source:HGNC Symbol;Acc:HGNC:11594]
ENSOARG00000006043	14.4769	8.82161	17.61	LRRC20	leucine rich repeat containing 20 [Source:HGNC Symbol;Acc:HGNC:23421]
ENSOARG00000001394	9.78304	7.21664	16.4541	GCSH	glycine cleavage system protein H (aminomethyl carrier) [Source:HGNC Symbol;Acc:HGNC:4208]
ENSOARG00000008554	13.7378	7.70875	15.6792	SLC25A33	solute carrier family 25 member 33 [Source:RefSeq peptide;Acc:NP_001120743]
ENSOARG00000016951	15.0488	2.45219	15.1126	KRT13	keratin 13, type I [Source:HGNC Symbol;Acc:HGNC:6415]
ENSOARG00000020519	12.7572	6.80762	14.8966	KNG1	kininogen 1 [Source:HGNC Symbol;Acc:HGNC:6383]
ENSOARG00000017826	9.82396	4.34541	14.6181	CAMKK1	calcium/calmodulin-dependent protein kinase kinase 1, alpha [Source:HGNC Symbol;Acc:HGNC:1469]
ENSOARG00000020287	8.44631	3.80942	14.5348	MUC20	mucin 20, cell surface associated [Source:HGNC Symbol;Acc:HGNC:23282]
ENSOARG00000001656	5.48328	6.63303	13.5769	TMEM52	transmembrane protein 52 [Source:HGNC Symbol;Acc:HGNC:27916]
ENSOARG00000014723	20.741	0.830854	13.4454	CXCL14	chemokine (C-X-C motif) ligand 14 [Source:HGNC Symbol;Acc:HGNC:10640]
ENSOARG00000018733	7.68478	5.37992	13.0514	-	Alpha-amylase [Source:UniProtKB/TrEMBL;Acc:W5QBM0]
ENSOARG00000020665	11.5124	6.28645	12.9362	ATP11B	ATPase, class VI, type 11B [Source:HGNC Symbol;Acc:HGNC:13553]
ENSOARG00000006212	7.12872	5.05085	12.7394	CRABP2	cellular retinoic acid binding protein 2 [Source:HGNC Symbol;Acc:HGNC:2339]
ENSOARG00000012314	5.50221	1.89036	12.5822	EN1	engrailed homeobox 1 [Source:HGNC Symbol;Acc:HGNC:3342]
ENSOARG00000015038	6.27832	1.69669	12.1982	SDR16C5	short chain dehydrogenase/reductase family 16C, member 5 [Source:HGNC Symbol;Acc:HGNC:30311]
ENSOARG00000004617	9.69265	5.55042	12.1906	-	Uncharacterized protein [Source:UniProtKB/TrEMBL;Acc:W5P3D9]
ENSOARG00000019036	5.95177	5.41253	11.747	C15orf59	chromosome 15 open reading frame 59 [Source:HGNC Symbol;Acc:HGNC:33753]
ENSOARG00000002554	3.21751	3.94265	10.171	SLC22A18	solute carrier family 22, member 18 [Source:HGNC Symbol;Acc:HGNC:10964]
ENSOARG00000018722	9.42709	3.71231	9.72963	HDAC4	histone deacetylase 4 [Source:HGNC Symbol;Acc:HGNC:14063]
ENSOARG00000014425	7.93739	4.55374	9.68723	MERTK	MER proto-oncogene, tyrosine kinase [Source:HGNC Symbol;Acc:HGNC:7027]
Novel00685	7.65225	0.621004	9.63012
ENSOARG00000000644	3.50583	3.67133	9.62866	FAM83D	family with sequence similarity 83, member D [Source:HGNC Symbol;Acc:HGNC:16122]
ENSOARG00000010512	13.5875	5.22885	9.46483	SGCD	sarcoglycan, delta (35kDa dystrophin-associated glycoprotein) [Source:HGNC Symbol;Acc:HGNC:10807]
ENSOARG00000016145	6.83971	3.56493	9.32921	NPTXR	neuronal pentraxin receptor [Source:HGNC Symbol;Acc:HGNC:7954]
Novel00003	5.00242	1.83237	9.29663
Novel00956	2.7871	3.62456	8.68024
ENSOARG00000014789	3.4876	1.91114	8.56856	MBOAT2	membrane bound O-acyltransferase domain containing 2 [Source:HGNC Symbol;Acc:HGNC:25193]
ENSOARG00000004088	8.0321	4.50115	8.53689	SLC25A13	solute carrier family 25 (aspartate/glutamate carrier), member 13 [Source:HGNC Symbol;Acc:HGNC:10983]
Novel02009	5.39084	3.08537	8.47187
ENSOARG00000011683	9.34417	2.57286	8.20968	DTX4	deltex 4, E3 ubiquitin ligase [Source:HGNC Symbol;Acc:HGNC:29151]
ENSOARG00000019031	3.08043	2.50343	8.06234	A4GALT	alpha 1,4-galactosyltransferase [Source:HGNC Symbol;Acc:HGNC:18149]
ENSOARG00000011464	4.8488	1.47703	7.89341	SYT17	synaptotagmin XVII [Source:HGNC Symbol;Acc:HGNC:24119]
Novel00033	8.71786	1.05879	7.88603
ENSOARG00000019395	5.89874	0.836405	7.15422	ALX3	ALX homeobox 3 [Source:HGNC Symbol;Acc:HGNC:449]
ENSOARG00000001444	3.13918	2.90006	7.05788	-	Uncharacterized protein [Source:UniProtKB/TrEMBL;Acc:W5NTL2]
ENSOARG00000021060	2.49145	1.79286	6.73102	RORC	RAR-related orphan receptor C [Source:HGNC Symbol;Acc:HGNC:10260]
Novel01719	4.15819	2.43469	6.72823
Novel02487	4.79522	2.50672	6.66032
Novel00090	3.66343	3.26599	6.58902
ENSOARG00000004396	3.43044	2.7488	6.38128	LRP3	low density lipoprotein receptor-related protein 3 [Source:HGNC Symbol;Acc:HGNC:6695]
ENSOARG00000015282	3.51251	2.23014	6.23053	KCTD14	potassium channel tetramerization domain containing 14 [Source:HGNC Symbol;Acc:HGNC:23295]
ENSOARG00000004250	2.19349	2.61495	6.1425	FAM57B	family with sequence similarity 57, member B [Source:HGNC Symbol;Acc:HGNC:25295]
ENSOARG00000022530	1.9681	0.350316	6.07064	oar-let-7d	oar-let-7d [Source:miRBase;Acc:MI0025244]
ENSOARG00000013739	4.48426	2.72559	5.91526	TUBA8	tubulin, alpha 8 [Source:HGNC Symbol;Acc:HGNC:12410]
ENSOARG00000013959	1.88897	1.05402	5.59503	CTBS	chitobiase, di-N-acetyl- [Source:HGNC Symbol;Acc:HGNC:2496]
ENSOARG00000018650	3.11345	0.700428	5.3947	NRN1	neuritin 1 [Source:HGNC Symbol;Acc:HGNC:17972]
ENSOARG00000000620	3.1277	2.26092	5.36555	CCDC85C	coiled-coil domain containing 85C [Source:HGNC Symbol;Acc:HGNC:35459]
ENSOARG00000019413	1.94288	2.03355	5.27595	FAM84A	family with sequence similarity 84, member A [Source:HGNC Symbol;Acc:HGNC:20743]
ENSOARG00000006034	3.86012	2.14772	5.11559	SIX2	SIX homeobox 2 [Source:HGNC Symbol;Acc:HGNC:10888]
Novel02457	2.35044	1.96471	4.90566
Novel01381	1.53075	0.733775	4.63856
ENSOARG00000002967	1.35719	1.60795	4.5486	SARDH	sarcosine dehydrogenase [Source:HGNC Symbol;Acc:HGNC:10536]
Novel00813	4.27023	1.13337	4.49148
Novel00214	1.93677	0.240203	4.25828
ENSOARG00000007640	1.90608	1.0198	4.24485	PLEKHA6	pleckstrin homology domain containing, family A member 6 [Source:HGNC Symbol;Acc:HGNC:17053]
ENSOARG00000015118	2.61723	1.38283	4.14394	BDNF	brain-derived neurotrophic factor [Source:HGNC Symbol;Acc:HGNC:1033]
Novel02176	3.5814	0.48496	4.03259
ENSOARG00000020677	0.963842	0.928633	4.02826	C2orf72	chromosome 2 open reading frame 72 [Source:HGNC Symbol;Acc:HGNC:27418]
Novel02437	1.37353	1.6234	3.97051
ENSOARG00000017394	1.35124	0.942246	3.95977	NRG2	neuregulin 2 [Source:HGNC Symbol;Acc:HGNC:7998]
ENSOARG00000004312	1.64123	0.583626	3.78108	TNNC1	troponin C type 1 (slow) [Source:HGNC Symbol;Acc:HGNC:11943]
ENSOARG00000026502	2.2952	1.49975	3.71719
Novel00755	1.90696	1.62245	3.70304
Novel01879	1.13032	0.884714	3.27098
ENSOARG00000007278	3.81664	0.892991	3.17772	ANGPTL5	angiopoietin-like 5 [Source:HGNC Symbol;Acc:HGNC:19705]
ENSOARG00000001219	1.97257	1.27224	3.09632	TXLNB	taxilin beta [Source:HGNC Symbol;Acc:HGNC:21617]
Novel00471	1.56489	0.955571	3.06986
ENSOARG00000016870	0.679924	0.536193	2.98518	SLC7A4	solute carrier family 7, member 4 [Source:HGNC Symbol;Acc:HGNC:11062]
ENSOARG00000026132	1.20545	0.816173	2.94189
Novel01741	1.35806	0.773827	2.89272
ENSOARG00000017049	0.432626	0.185571	2.81525	-	Uncharacterized protein [Source:UniProtKB/TrEMBL;Acc:W5Q6G0]
Novel01864	1.70321	0.748708	2.79522
ENSOARG00000011432	1.24972	1.02862	2.65547	GINS2	GINS complex subunit 2 (Psf2 homolog) [Source:HGNC Symbol;Acc:HGNC:24575]
Novel00450	0.722985	0.730991	2.58082
ENSOARG00000014433	0.704269	0.413732	2.51222	PKD2L1	polycystic kidney disease 2-like 1 [Source:HGNC Symbol;Acc:HGNC:9011]
ENSOARG00000004874	1.2964	1.12855	2.44331	FAM160A1	family with sequence similarity 160, member A1 [Source:HGNC Symbol;Acc:HGNC:34237]
ENSOARG00000009194	1.98555	0.681384	2.3885	ATP10A	ATPase, class V, type 10A [Source:HGNC Symbol;Acc:HGNC:13542]
ENSOARG00000004672	0.523215	0.596538	2.19667	FAM69C	family with sequence similarity 69, member C [Source:HGNC Symbol;Acc:HGNC:31729]
ENSOARG00000007510	0.542795	0.120597	2.18729	TMEM61	transmembrane protein 61 [Source:HGNC Symbol;Acc:HGNC:27296]
ENSOARG00000017050	3.8325	1.11717	2.07326	SLC27A6	solute carrier family 27 (fatty acid transporter), member 6 [Source:HGNC Symbol;Acc:HGNC:11000]
ENSOARG00000026988	0.370604	0.0260152	1.98832
ENSOARG00000016103	0.800041	0.572812	1.92851	GREB1	growth regulation by estrogen in breast cancer 1 [Source:HGNC Symbol;Acc:HGNC:24885]
ENSOARG00000001806	0.609968	0.655242	1.88733	THEM6	thioesterase superfamily member 6 [Source:HGNC Symbol;Acc:HGNC:29656]
ENSOARG00000011188	1.0167	0.882513	1.85608	MYH7B	myosin, heavy chain 7B, cardiac muscle, beta [Source:HGNC Symbol;Acc:HGNC:15906]
Novel01101	1.36459	0.0518401	1.84063
ENSOARG00000003149	0.703341	0.556282	1.74819	UNC5A	unc-5 netrin receptor A [Source:HGNC Symbol;Acc:HGNC:12567]
Novel00830	0.0669217	0	1.7177
ENSOARG00000001862	1.99181	0.637651	1.64716	PITPNM3	PITPNM family member 3 [Source:HGNC Symbol;Acc:HGNC:21043]
ENSOARG00000015708	1.49428	0.165903	1.6219	CHODL	chondrolectin [Source:HGNC Symbol;Acc:HGNC:17807]
Novel00684	1.41846	0.302416	1.59579
ENSOARG00000021056	0.641587	0.227665	1.56668
Novel02078	0.608405	0.0667298	1.52542
ENSOARG00000004394	1.37832	0.435825	1.51222	FAM169A	family with sequence similarity 169, member A [Source:HGNC Symbol;Acc:HGNC:29138]
Novel01513	0.630379	0.465966	1.49414
Novel01364	0.413227	0.083671	1.47799
Novel01871	0	0.0172367	1.4379	--	FAER314Wp [Ashbya gossypii FDAG1]
Novel02331	0.978774	0.320502	1.41109
Novel00975	0.551999	0.61008	1.25759
Novel00905	0.402509	0.160817	1.15421
Novel00187	0.00653976	0.0181557	1.12574
Novel00605	0.358796	0.121311	1.10553
ENSOARG00000016363	0.0355396	0.0342059	1.09751	HOXC13	homeobox C13 [Source:HGNC Symbol;Acc:HGNC:5125]
ENSOARG00000011075	0.681268	0.0209101	1.08704	SELE	E-selectin [Source:RefSeq peptide;Acc:NP_001009749]
ENSOARG00000012178	0.215254	0.0783927	1.0634	HPSE2	heparanase 2 (inactive) [Source:HGNC Symbol;Acc:HGNC:18374]
Novel01142	0.374353	0.155173	0.992234
ENSOARG00000000431	0.5101	0.316993	0.955727	-	Uncharacterized protein [Source:UniProtKB/TrEMBL;Acc:W5NQI8]
ENSOARG00000002449	0.216389	0.0623574	0.914803	SP5	Sp5 transcription factor [Source:HGNC Symbol;Acc:HGNC:14529]
Novel02431	0.977838	0.253665	0.863748
ENSOARG00000025715	0.133068	0.140796	0.824429
ENSOARG00000016285	0.260494	0.1438	0.81119	GDF-8	Growth/differentiation factor 8 [Source:UniProtKB/Swiss-Prot;Acc:O18830]
Novel01912	0.525199	0.315586	0.796861
ENSOARG00000019817	0.0751538	0.0723851	0.68396	NR1I2	nuclear receptor subfamily 1, group I, member 2 [Source:HGNC Symbol;Acc:HGNC:7968]
ENSOARG00000005467	0.0113076	0.00303196	0.683732	ZIC4	Zic family member 4 [Source:HGNC Symbol;Acc:HGNC:20393]

## Sheet: subcluster2
Gene_ID	SAT	VAT	TAT	Gene_Symbol	Description
ENSOARG00000009999	261.267	1007.5	249.664	JUN	jun proto-oncogene [Source:HGNC Symbol;Acc:HGNC:6204]
ENSOARG00000003963	303.834	978.031	202.39	DUSP1	dual specificity phosphatase 1 [Source:HGNC Symbol;Acc:HGNC:3064]
ENSOARG00000005443	107.807	631.907	68.2712	DNAJB1	DnaJ (Hsp40) homolog, subfamily B, member 1 [Source:HGNC Symbol;Acc:HGNC:5270]
ENSOARG00000016798	280.959	580.246	178.531	SAT1	spermidine/spermine N1-acetyltransferase 1 [Source:HGNC Symbol;Acc:HGNC:10540]
Novel00116	160.251	504.114	96.3469	-
ENSOARG00000010748	101.436	449.876	153.246	C11orf96	chromosome 11 open reading frame 96 [Source:HGNC Symbol;Acc:HGNC:38675]
ENSOARG00000004208	122.501	422.708	93.6037	C8orf4	chromosome 8 open reading frame 4 [Source:HGNC Symbol;Acc:HGNC:1357]
ENSOARG00000007452	14.9276	326.903	1.76862	-	Uncharacterized protein [Source:UniProtKB/TrEMBL;Acc:W5PC31]
ENSOARG00000007656	93.0484	265.316	83.8729	BGN	biglycan [Source:HGNC Symbol;Acc:HGNC:1044]
ENSOARG00000006068	110.128	262.713	84.3728	ZFP36	ZFP36 ring finger protein [Source:HGNC Symbol;Acc:HGNC:12862]
ENSOARG00000017214	61.5153	228.872	41.0525	NR4A1	nuclear receptor subfamily 4, group A, member 1 [Source:HGNC Symbol;Acc:HGNC:7980]
ENSOARG00000004174	28.9211	228.808	64.9899	TAGLN	transgelin [Source:HGNC Symbol;Acc:HGNC:11553]
ENSOARG00000009779	92.4192	210.727	63.0144	CFD	complement factor D (adipsin) [Source:HGNC Symbol;Acc:HGNC:2771]
ENSOARG00000018248	55.9762	153.878	49.9883	MFAP4	microfibrillar-associated protein 4 [Source:HGNC Symbol;Acc:HGNC:7035]
ENSOARG00000010493	17.2623	152.389	11.9529	ATF3	activating transcription factor 3 [Source:HGNC Symbol;Acc:HGNC:785]
ENSOARG00000014123	8.86387	151.946	7.95438	PI16	peptidase inhibitor 16 [Source:HGNC Symbol;Acc:HGNC:21245]
ENSOARG00000007234	49.384	132.979	31.923	PLK2	polo-like kinase 2 [Source:HGNC Symbol;Acc:HGNC:19699]
ENSOARG00000012344	34.143	99.4361	20.6305	PPP1R15A	protein phosphatase 1, regulatory subunit 15A [Source:HGNC Symbol;Acc:HGNC:14375]
ENSOARG00000011235	23.5595	84.419	15.6785	-	Uncharacterized protein [Source:UniProtKB/TrEMBL;Acc:W5PNM3]
ENSOARG00000007191	36.3495	82.3508	26.2275	-	Uncharacterized protein [Source:UniProtKB/TrEMBL;Acc:W5PB95]
ENSOARG00000002811	26.4302	81.2082	18.8456	CCNL1	cyclin L1 [Source:HGNC Symbol;Acc:HGNC:20569]
ENSOARG00000000950	30.5734	81.049	17.5491	A2M	alpha-2-macroglobulin [Source:HGNC Symbol;Acc:HGNC:7]
ENSOARG00000001680	26.2975	76.8483	29.2178	SFRP2	secreted frizzled-related protein 2 [Source:HGNC Symbol;Acc:HGNC:10777]
ENSOARG00000012074	24.949	71.8317	36.0464	RASIP1	Ras interacting protein 1 [Source:HGNC Symbol;Acc:HGNC:24716]
ENSOARG00000018528	22.1371	67.6494	12.9464	TGM2	transglutaminase 2 [Source:HGNC Symbol;Acc:HGNC:11778]
ENSOARG00000013187	23.1475	62.4651	34.7806	NEXN	nexilin (F actin binding protein) [Source:HGNC Symbol;Acc:HGNC:29557]
ENSOARG00000020422	19.6627	59.0772	21.7337	HES1	hes family bHLH transcription factor 1 [Source:HGNC Symbol;Acc:HGNC:5192]
ENSOARG00000007840	11.9275	55.1154	15.0072	BHLHE40	basic helix-loop-helix family, member e40 [Source:HGNC Symbol;Acc:HGNC:1046]
ENSOARG00000020769	18.3279	52.6986	25.7888	PLEKHO1	pleckstrin homology domain containing, family O member 1 [Source:HGNC Symbol;Acc:HGNC:24310]
ENSOARG00000019971	15.5928	52.5119	11.8293	PLN	phospholamban [Source:HGNC Symbol;Acc:HGNC:9080]
ENSOARG00000001701	16.7495	50.5404	19.5234	-	Uncharacterized protein [Source:UniProtKB/TrEMBL;Acc:W5NUE9]
ENSOARG00000001202	12.782	48.6626	11.2021	PLK3	polo-like kinase 3 [Source:HGNC Symbol;Acc:HGNC:2154]
ENSOARG00000009401	11.4325	45.9386	6.61229	PTGER4	prostaglandin E receptor 4 (subtype EP4) [Source:HGNC Symbol;Acc:HGNC:9596]
ENSOARG00000010462	7.20678	45.6989	3.12415	CXCR4	C-X-C chemokine receptor type 4 [Source:RefSeq peptide;Acc:NP_001264097]
ENSOARG00000013176	19.9647	42.3912	15.009	FLI1	Fli-1 proto-oncogene, ETS transcription factor [Source:HGNC Symbol;Acc:HGNC:3749]
ENSOARG00000005916	15.3247	41.6692	25.2774	CHRNE	cholinergic receptor, nicotinic, epsilon (muscle) [Source:HGNC Symbol;Acc:HGNC:1966]
ENSOARG00000017093	17.1958	35.4168	11.7893	SPRY1	sprouty RTK signaling antagonist 1 [Source:HGNC Symbol;Acc:HGNC:11269]
ENSOARG00000026747	13.9472	33.8906	9.60692	-
ENSOARG00000003604	14.7622	33.1142	9.98808	CORO1A	coronin, actin binding protein, 1A [Source:HGNC Symbol;Acc:HGNC:2252]
ENSOARG00000018487	7.73328	32.6767	7.35265	CTSW	cathepsin W [Source:HGNC Symbol;Acc:HGNC:2546]
ENSOARG00000014069	10.5898	32.1404	9.85632	-	Uncharacterized protein [Source:UniProtKB/TrEMBL;Acc:W5PXC6]
Novel02441	9.60617	31.4661	12.7856	-
ENSOARG00000011933	12.6716	30.0891	8.22916	ADAP2	ArfGAP with dual PH domains 2 [Source:HGNC Symbol;Acc:HGNC:16487]
ENSOARG00000008127	10.5438	29.537	14.7816	DEDD2	death effector domain containing 2 [Source:HGNC Symbol;Acc:HGNC:24450]
ENSOARG00000008984	6.56205	27.971	4.09393	CD3E	CD3e molecule, epsilon (CD3-TCR complex) [Source:HGNC Symbol;Acc:HGNC:1674]
ENSOARG00000017006	10.2611	27.0013	6.03063	-	Uncharacterized protein [Source:UniProtKB/TrEMBL;Acc:W5Q6B6]
ENSOARG00000004964	5.12943	26.6956	6.54608	CCL5	chemokine (C-C motif) ligand 5 [Source:HGNC Symbol;Acc:HGNC:10632]
ENSOARG00000009653	5.4035	25.6621	7.69081	RGS2	regulator of G-protein signaling 2 [Source:HGNC Symbol;Acc:HGNC:9998]
ENSOARG00000019648	7.95258	25.4643	11.6412	FAM212B	family with sequence similarity 212, member B [Source:HGNC Symbol;Acc:HGNC:28045]
ENSOARG00000016296	8.41493	24.7773	12.454	HOXC6	homeobox C6 [Source:HGNC Symbol;Acc:HGNC:5128]
ENSOARG00000014623	0.0799062	24.4499	0.0929981	TCF21	transcription factor 21 [Source:HGNC Symbol;Acc:HGNC:11632]
ENSOARG00000000123	5.94876	22.9223	7.34213	CX3CL1	chemokine (C-X3-C motif) ligand 1 [Source:HGNC Symbol;Acc:HGNC:10647]
Novel02539	7.51115	22.281	8.09439	-
ENSOARG00000025779	0.792235	21.468	4.53444	-
ENSOARG00000024490	1.32218	19.3833	2.21485	U3	Small nucleolar RNA U3 [Source:RFAM;Acc:RF00012]
ENSOARG00000012400	8.50166	19.3109	6.09143	-
ENSOARG00000002307	1.38783	18.739	0.0606166	DLK1	delta-like 1 homolog (Drosophila) [Source:HGNC Symbol;Acc:HGNC:2907]
Novel00917	6.60362	18.0972	6.58393	-
ENSOARG00000014103	3.39156	16.206	2.94151	NOCT	nocturnin [Source:HGNC Symbol;Acc:HGNC:14254]
ENSOARG00000005164	4.42206	16.0132	4.98764	HCST	hematopoietic cell signal transducer [Source:HGNC Symbol;Acc:HGNC:16977]
ENSOARG00000009791	2.81278	15.7554	1.13287	RGS1	regulator of G-protein signaling 1 [Source:HGNC Symbol;Acc:HGNC:9991]
ENSOARG00000002790	3.30705	15.7385	2.92991	SLIT3	slit guidance ligand 3 [Source:HGNC Symbol;Acc:HGNC:11087]
ENSOARG00000001158	3.06193	14.9647	2.82865	LAT	linker for activation of T cells [Source:HGNC Symbol;Acc:HGNC:18874]
ENSOARG00000006374	3.32836	14.7309	2.50571	-	Uncharacterized protein [Source:UniProtKB/TrEMBL;Acc:W5P8R9]
ENSOARG00000006813	6.24833	14.4879	3.51351	VEGFC	vascular endothelial growth factor C [Source:HGNC Symbol;Acc:HGNC:12682]
ENSOARG00000020563	4.33995	14.3322	5.55488	RERGL	RERG/RAS-like [Source:HGNC Symbol;Acc:HGNC:26213]
ENSOARG00000017249	4.19724	13.3337	3.6836	-	Uncharacterized protein [Source:UniProtKB/TrEMBL;Acc:W5Q721]
ENSOARG00000009758	1.09399	12.8395	5.09058	HOXA6	homeobox A6 [Source:HGNC Symbol;Acc:HGNC:5107]
ENSOARG00000016306	1.78004	12.0133	3.57383	HOXC8	homeobox C8 [Source:HGNC Symbol;Acc:HGNC:5129]
ENSOARG00000006139	2.56436	11.815	2.69886	PRF1	perforin 1 (pore forming protein) [Source:HGNC Symbol;Acc:HGNC:9360]
ENSOARG00000019168	0.363689	11.7546	0.746054	TCF23	transcription factor 23 [Source:HGNC Symbol;Acc:HGNC:18602]
ENSOARG00000009172	3.21786	11.5067	1.48221	CD3D	CD3d molecule, delta (CD3-TCR complex) [Source:HGNC Symbol;Acc:HGNC:1673]
ENSOARG00000004802	3.29776	11.2646	2.70319	-	Uncharacterized protein [Source:UniProtKB/TrEMBL;Acc:W5P3Z3]
ENSOARG00000022822	0	10.5794	0.245999	SNORD14	Small nucleolar RNA SNORD14 [Source:RFAM;Acc:RF00016]
Novel01831	3.78539	10.5465	1.86624	-	Cdc42p [Rhizophagus irregularis DAOM 197198w]
ENSOARG00000016109	3.63739	10.1103	2.03708	IL2RG	interleukin 2 receptor, gamma [Source:HGNC Symbol;Acc:HGNC:6010]
ENSOARG00000019754	1.31415	10.0045	0.584648	GPR1	G protein-coupled receptor 1 [Source:HGNC Symbol;Acc:HGNC:4463]
ENSOARG00000019197	3.14044	9.72784	1.52738	IL2RB	interleukin 2 receptor, beta [Source:HGNC Symbol;Acc:HGNC:6009]
ENSOARG00000010939	1.11844	9.60733	0.264042	NR4A3	nuclear receptor subfamily 4, group A, member 3 [Source:HGNC Symbol;Acc:HGNC:7982]
ENSOARG00000010445	3.10114	9.45903	4.1021	EBI3	Epstein-Barr virus induced 3 [Source:HGNC Symbol;Acc:HGNC:3129]
ENSOARG00000019876	3.63416	9.44953	2.97236	ARHGAP25	Rho GTPase activating protein 25 [Source:HGNC Symbol;Acc:HGNC:28951]
ENSOARG00000009972	4.47775	9.41601	2.8364	FMNL1	formin-like 1 [Source:HGNC Symbol;Acc:HGNC:1212]
ENSOARG00000017877	2.39343	9.37953	0.972973	-	Uncharacterized protein [Source:UniProtKB/TrEMBL;Acc:W5Q8Z2]
ENSOARG00000012408	3.77611	9.31615	3.13938	PARP12	poly (ADP-ribose) polymerase family, member 12 [Source:HGNC Symbol;Acc:HGNC:21919]
ENSOARG00000012145	2.92607	9.28836	2.26068	WAS	Wiskott-Aldrich syndrome [Source:HGNC Symbol;Acc:HGNC:12731]
ENSOARG00000009084	3.8126	9.15254	2.4395	RUNX1T1	runt-related transcription factor 1; translocated to, 1 (cyclin D-related) [Source:HGNC Symbol;Acc:HGNC:1535]
ENSOARG00000008091	3.40032	8.64723	1.87299	HLA-DOA	major histocompatibility complex, class II, DO alpha [Source:HGNC Symbol;Acc:HGNC:4936]
ENSOARG00000020138	1.78828	8.42209	1.36774	NGF	nerve growth factor (beta polypeptide) [Source:HGNC Symbol;Acc:HGNC:7808]
ENSOARG00000019445	1.63486	8.40451	1.25518	TRAC	T cell receptor alpha constant [Source:HGNC Symbol;Acc:HGNC:12029]
ENSOARG00000006135	2.55291	8.27538	1.71123	SEPT1	septin 1 [Source:HGNC Symbol;Acc:HGNC:2879]
ENSOARG00000001589	1.86994	8.22801	1.15049	-	Uncharacterized protein [Source:UniProtKB/TrEMBL;Acc:W5NU18]
ENSOARG00000008507	2.69066	8.03432	1.76576	ALPL	alkaline phosphatase, liver/bone/kidney [Source:HGNC Symbol;Acc:HGNC:438]
ENSOARG00000011437	1.62719	7.87462	1.82233	TBC1D10C	TBC1 domain family, member 10C [Source:HGNC Symbol;Acc:HGNC:24702]
ENSOARG00000008136	2.83248	7.53686	1.5635	SUSD3	sushi domain containing 3 [Source:HGNC Symbol;Acc:HGNC:28391]
ENSOARG00000016334	0.0108321	7.52312	0.0427522	WT1	Wilms tumor 1 [Source:HGNC Symbol;Acc:HGNC:12796]
ENSOARG00000013931	1.66144	7.52263	1.88886	SH3BP1	SH3-domain binding protein 1 [Source:HGNC Symbol;Acc:HGNC:10824]
ENSOARG00000006979	3.40981	7.06641	2.40574	RHBDF2	rhomboid 5 homolog 2 (Drosophila) [Source:HGNC Symbol;Acc:HGNC:20788]
ENSOARG00000010834	2.82814	7.02097	1.62289	HMHA1	histocompatibility (minor) HA-1 [Source:HGNC Symbol;Acc:HGNC:17102]
ENSOARG00000002970	2.09575	6.99012	2.03834	-	Uncharacterized protein [Source:UniProtKB/TrEMBL;Acc:W5NYB0]
ENSOARG00000020968	2.0382	6.83508	1.65591	LCK	LCK proto-oncogene, Src family tyrosine kinase [Source:HGNC Symbol;Acc:HGNC:6524]
ENSOARG00000009724	1.34659	6.68357	2.09617	-	Uncharacterized protein [Source:UniProtKB/TrEMBL;Acc:W5PJ07]
ENSOARG00000002632	0.300602	6.61487	0.225947	-	Uncharacterized protein [Source:UniProtKB/TrEMBL;Acc:W5NX98]
ENSOARG00000008703	1.60068	6.46645	2.13313	GZMM	granzyme M (lymphocyte met-ase 1) [Source:HGNC Symbol;Acc:HGNC:4712]
ENSOARG00000003586	1.82746	6.41445	2.09888	IGF2	insulin-like growth factor 2 [Source:HGNC Symbol;Acc:HGNC:5466]
ENSOARG00000009551	1.69375	6.25165	1.1689	FYB	FYN binding protein [Source:HGNC Symbol;Acc:HGNC:4036]
ENSOARG00000016560	1.94914	6.20772	3.85776	IGFALS	insulin-like growth factor binding protein, acid labile subunit [Source:HGNC Symbol;Acc:HGNC:5468]
ENSOARG00000017076	1.26046	6.20718	1.48885	PVRIG	poliovirus receptor related immunoglobulin domain containing [Source:HGNC Symbol;Acc:HGNC:32190]
ENSOARG00000004186	2.46234	6.14975	1.37334	FAM13C	family with sequence similarity 13, member C [Source:HGNC Symbol;Acc:HGNC:19371]
ENSOARG00000020475	2.37379	6.10357	1.17897	P3H2	prolyl 3-hydroxylase 2 [Source:HGNC Symbol;Acc:HGNC:19317]
ENSOARG00000013646	1.25194	6.06925	0.833823	ZAP70	zeta-chain (TCR) associated protein kinase 70kDa [Source:HGNC Symbol;Acc:HGNC:12858]
ENSOARG00000002108	1.95205	6.06429	1.11527	-	Uncharacterized protein [Source:UniProtKB/TrEMBL;Acc:W5NVM4]
Novel00812	1.15143	6.0456	0.447721	-
ENSOARG00000020734	2.14646	6.00879	1.27208	CD8A	CD8a molecule [Source:HGNC Symbol;Acc:HGNC:1706]
ENSOARG00000004484	1.82985	5.8987	1.12159	RGS14	regulator of G-protein signaling 14 [Source:HGNC Symbol;Acc:HGNC:9996]
ENSOARG00000015180	1.83399	5.83965	1.28263	BAMBI	BMP and activin membrane-bound inhibitor homolog precursor [Source:RefSeq peptide;Acc:NP_001009761]
ENSOARG00000001645	1.1527	5.79419	0.742508	-	Uncharacterized protein [Source:UniProtKB/TrEMBL;Acc:W5NU82]
ENSOARG00000009009	2.13353	5.76335	1.15708	CD244	CD244 molecule, natural killer cell receptor 2B4 [Source:HGNC Symbol;Acc:HGNC:18171]
ENSOARG00000008903	1.77226	5.74228	1.1632	CHN2	chimerin 2 [Source:HGNC Symbol;Acc:HGNC:1944]
ENSOARG00000005599	1.32089	5.66453	1.35706	DENND1C	DENN/MADD domain containing 1C [Source:HGNC Symbol;Acc:HGNC:26225]
ENSOARG00000012918	2.4719	5.64724	1.43776	TRAF3IP3	TRAF3 interacting protein 3 [Source:HGNC Symbol;Acc:HGNC:30766]
ENSOARG00000010080	2.07812	5.60121	1.0269	SULF2	sulfatase 2 [Source:HGNC Symbol;Acc:HGNC:20392]
ENSOARG00000013941	1.36035	5.5264	2.00675	GATA3	GATA binding protein 3 [Source:HGNC Symbol;Acc:HGNC:4172]
ENSOARG00000020747	1.89788	5.42483	0.912091	CD8B	CD8b molecule [Source:HGNC Symbol;Acc:HGNC:1707]
Novel00713	1.33356	5.25446	2.18801	-
ENSOARG00000016062	1.27305	4.99575	0.649856	CD6	CD6 molecule [Source:HGNC Symbol;Acc:HGNC:1691]
ENSOARG00000004356	1.77076	4.93174	1.88594	CARD11	caspase recruitment domain family, member 11 [Source:HGNC Symbol;Acc:HGNC:16393]
ENSOARG00000004628	1.51875	4.90648	1.26031	ZNF683	zinc finger protein 683 [Source:HGNC Symbol;Acc:HGNC:28495]
ENSOARG00000023987	0.526492	4.86368	0.844139	U3	Small nucleolar RNA U3 [Source:RFAM;Acc:RF00012]
ENSOARG00000012094	1.52877	4.77105	0.791683	FHL5	four and a half LIM domains 5 [Source:HGNC Symbol;Acc:HGNC:17371]
ENSOARG00000014361	1.61889	4.74963	0.597567	SEMA5A	sema domain, seven thrombospondin repeats (type 1 and type 1-like), transmembrane domain (TM) and short cytoplasmic domain, (semaphorin) 5A [Source:HGNC Symbol;Acc:HGNC:10736]
ENSOARG00000015723	1.5324	4.64027	1.0063	PLCL1	phospholipase C-like 1 [Source:HGNC Symbol;Acc:HGNC:9063]
ENSOARG00000016138	1.36776	4.57164	0.929129	CD5	CD5 molecule [Source:HGNC Symbol;Acc:HGNC:1685]
ENSOARG00000000571	1.55688	4.54954	0.656786	RHOH	ras homolog family member H [Source:HGNC Symbol;Acc:HGNC:686]
ENSOARG00000015006	1.50107	4.52983	2.45536	SASH3	SAM and SH3 domain containing 3 [Source:HGNC Symbol;Acc:HGNC:15975]
ENSOARG00000017344	1.75017	4.48832	1.13208	BIN2	bridging integrator 2 [Source:HGNC Symbol;Acc:HGNC:1053]
ENSOARG00000015970	0.902171	4.3576	0.530357	SLA2	Src-like-adaptor 2 [Source:HGNC Symbol;Acc:HGNC:17329]
ENSOARG00000017037	1.32032	4.30497	0.598563	SHISA2	shisa family member 2 [Source:HGNC Symbol;Acc:HGNC:20366]
ENSOARG00000009042	1.25241	4.2839	1.48577	-	Uncharacterized protein [Source:UniProtKB/TrEMBL;Acc:W5PGZ6]
ENSOARG00000005846	1.24062	4.25731	1.03441	TMC8	transmembrane channel-like 8 [Source:HGNC Symbol;Acc:HGNC:20474]
ENSOARG00000010358	0.944566	4.1461	1.43783	RUNX2	runt-related transcription factor 2 [Source:HGNC Symbol;Acc:HGNC:10472]
ENSOARG00000010199	1.28681	4.02761	0.619662	EGR3	early growth response 3 [Source:HGNC Symbol;Acc:HGNC:3240]
ENSOARG00000014631	1.40103	4.02538	0.843979	JAK3	Janus kinase 3 [Source:HGNC Symbol;Acc:HGNC:6193]
ENSOARG00000006400	0.827752	4.0102	0.822961	SH2D2A	SH2 domain containing 2A [Source:HGNC Symbol;Acc:HGNC:10821]
ENSOARG00000005746	1.25118	4.00517	0.841438	MAP4K1	mitogen-activated protein kinase kinase kinase kinase 1 [Source:HGNC Symbol;Acc:HGNC:6863]
ENSOARG00000008340	1.62373	3.88653	1.11767	TBX21	T-box 21 [Source:HGNC Symbol;Acc:HGNC:11599]
ENSOARG00000001672	0.645169	3.84531	1.49747	-	Uncharacterized protein [Source:UniProtKB/TrEMBL;Acc:W5NUA7]
ENSOARG00000021002	0.716868	3.81925	0.509304	-	Uncharacterized protein [Source:UniProtKB/TrEMBL;Acc:W5QIL8]
ENSOARG00000021000	0.893575	3.59313	0.684592	-	Uncharacterized protein [Source:UniProtKB/TrEMBL;Acc:W5QIL5]
ENSOARG00000015379	0.0660609	3.56166	0.0215657	ALX1	ALX homeobox 1 [Source:HGNC Symbol;Acc:HGNC:1494]
ENSOARG00000007774	1.16123	3.53294	0.373941	CYTIP	cytohesin 1 interacting protein [Source:HGNC Symbol;Acc:HGNC:9506]
ENSOARG00000008332	0.941187	3.49757	0.471206	CD27	CD27 molecule [Source:HGNC Symbol;Acc:HGNC:11922]
ENSOARG00000006353	0.737312	3.41839	0.132057	OSM	oncostatin M [Source:HGNC Symbol;Acc:HGNC:8506]
ENSOARG00000012346	0.935592	3.37537	1.81987	ARMC12	armadillo repeat containing 12 [Source:HGNC Symbol;Acc:HGNC:21099]
ENSOARG00000017970	0.93193	3.33777	0.318872	-	Uncharacterized protein [Source:UniProtKB/TrEMBL;Acc:W5Q999]
ENSOARG00000013631	1.09313	3.28053	0.620986	FAM65C	family with sequence similarity 65, member C [Source:HGNC Symbol;Acc:HGNC:16168]
ENSOARG00000006809	1.10094	3.24856	0.661174	-	Uncharacterized protein [Source:UniProtKB/TrEMBL;Acc:W5PA32]
Novel00292	0.319249	2.9955	1.00896	-
ENSOARG00000020249	0.612484	2.9709	0.447241	CD2	CD2 molecule [Source:HGNC Symbol;Acc:HGNC:1639]
ENSOARG00000003349	0.689486	2.96459	1.18456	-	Uncharacterized protein [Source:UniProtKB/TrEMBL;Acc:W5NZH2]
ENSOARG00000001465	0.802156	2.9439	0.359491	-	Uncharacterized protein [Source:UniProtKB/TrEMBL;Acc:W5NTM9]
ENSOARG00000019179	0.755045	2.8835	0.381657	CD96	CD96 molecule [Source:HGNC Symbol;Acc:HGNC:16892]
ENSOARG00000017562	0.550375	2.81168	0.52866	CXCR3	chemokine (C-X-C motif) receptor 3 [Source:HGNC Symbol;Acc:HGNC:4540]
ENSOARG00000010959	0.60383	2.70665	0.380358	SCML4	sex comb on midleg-like 4 (Drosophila) [Source:HGNC Symbol;Acc:HGNC:21397]
ENSOARG00000004787	0.431228	2.45726	0.185429	SLIT2	slit guidance ligand 2 [Source:HGNC Symbol;Acc:HGNC:11086]
ENSOARG00000016754	0.630309	2.43734	0.157922	CD7	CD7 molecule [Source:HGNC Symbol;Acc:HGNC:1695]
ENSOARG00000001579	0.681094	2.38089	0.435941	-	Uncharacterized protein [Source:UniProtKB/TrEMBL;Acc:W5NU09]
ENSOARG00000003099	0.527894	2.26434	0.600008	RASAL3	RAS protein activator like 3 [Source:HGNC Symbol;Acc:HGNC:26129]
ENSOARG00000005579	0.65499	2.14636	0.381706	SEMA4A	sema domain, immunoglobulin domain (Ig), transmembrane domain (TM) and short cytoplasmic domain, (semaphorin) 4A [Source:HGNC Symbol;Acc:HGNC:10729]
ENSOARG00000017362	0.589224	2.04816	0.263645	SNX20	sorting nexin 20 [Source:HGNC Symbol;Acc:HGNC:30390]
ENSOARG00000000042	0	2.02267	0	CYP2E1	cytochrome P450, family 2, subfamily E, polypeptide 1 [Source:HGNC Symbol;Acc:HGNC:2631]
ENSOARG00000008893	0.502336	2.01508	0.0876409	SLAMF1	signaling lymphocytic activation molecule family member 1 [Source:HGNC Symbol;Acc:HGNC:10903]
Novel01362	0.294372	1.95609	0.216827	-
Novel00337	0.483441	1.92865	0.262672	-
ENSOARG00000005151	0.356473	1.90245	0.144085	HMCN1	hemicentin 1 [Source:HGNC Symbol;Acc:HGNC:19194]
ENSOARG00000017928	0.269372	1.89227	0.0914036	-	Uncharacterized protein [Source:UniProtKB/TrEMBL;Acc:W5Q947]
ENSOARG00000004499	0.176363	1.76157	0.274348	DLX5	distal-less homeobox 5 [Source:HGNC Symbol;Acc:HGNC:2918]
Novel01321	0.299871	1.75095	0.145457	-
ENSOARG00000014277	0.499191	1.67573	0.169232	CXCR6	chemokine (C-X-C motif) receptor 6 [Source:HGNC Symbol;Acc:HGNC:16647]
ENSOARG00000002316	0.366673	1.64148	0.124698	-	Uncharacterized protein [Source:UniProtKB/TrEMBL;Acc:W5NWA6]
ENSOARG00000015215	0.248159	1.58676	0.122856	BLK	BLK proto-oncogene, Src family tyrosine kinase [Source:HGNC Symbol;Acc:HGNC:1057]
ENSOARG00000011171	0.358064	1.49547	0.0911626	ITK	IL2-inducible T-cell kinase [Source:HGNC Symbol;Acc:HGNC:6171]
Novel01890	0.153989	1.41862	0.554959	-
Novel01807	0.0720964	1.28841	0.35393	-

## Sheet: subcluster3
Gene_ID	SAT	VAT	TAT	Gene_Symbol	Description
ENSOARG00000016042	332.756	375.21	102.809	THY1	Thy-1 cell surface antigen [Source:HGNC Symbol;Acc:HGNC:11801]
ENSOARG00000007977	189.936	229.76	57.8685	C1QB	complement component 1, q subcomponent, B chain [Source:HGNC Symbol;Acc:HGNC:1242]
ENSOARG00000007991	137.676	183.889	43.7373	C1QC	complement component 1, q subcomponent, C chain [Source:HGNC Symbol;Acc:HGNC:1245]
ENSOARG00000004721	132.886	111.781	18.3613	-	regakine 1-like protein precursor [Source:RefSeq peptide;Acc:NP_001093099]
ENSOARG00000002053	121.219	187.425	12.6378	EFEMP1	EGF containing fibulin-like extracellular matrix protein 1 [Source:HGNC Symbol;Acc:HGNC:3218]
ENSOARG00000015646	106.615	162.097	33.7815	-	Beta-2-microglobulin [Source:UniProtKB/TrEMBL;Acc:W5Q244]
ENSOARG00000001456	87.1782	88.3706	16.2013	GFPT2	glutamine-fructose-6-phosphate transaminase 2 [Source:HGNC Symbol;Acc:HGNC:4242]
ENSOARG00000021018	78.0613	91.9269	20.4414	FBN1	fibrillin 1 [Source:HGNC Symbol;Acc:HGNC:3603]
ENSOARG00000005167	78.022	86.4638	27.7682	TYROBP	TYRO protein tyrosine kinase binding protein [Source:HGNC Symbol;Acc:HGNC:12449]
ENSOARG00000009627	71.9906	64.9946	10.4878	CCL2	chemokine (C-C motif) ligand 2 [Source:HGNC Symbol;Acc:HGNC:10618]
ENSOARG00000025180	62.3793	63.7457	16.238	CD14	monocyte differentiation antigen CD14 precursor [Source:RefSeq peptide;Acc:NP_001070677]
ENSOARG00000004778	59.7892	40.2887	16.998	-	Uncharacterized protein [Source:UniProtKB/TrEMBL;Acc:W5P3W3]
ENSOARG00000004774	59.0177	57.1499	17.4962	-	Uncharacterized protein [Source:UniProtKB/TrEMBL;Acc:W5P3V8]
ENSOARG00000005322	56.9651	56.4841	12.4732	SRGN	serglycin [Source:HGNC Symbol;Acc:HGNC:9361]
ENSOARG00000017397	56.7882	50.2781	17.1351	RHOBTB3	Rho-related BTB domain containing 3 [Source:HGNC Symbol;Acc:HGNC:18757]
ENSOARG00000005117	48.8114	43.4599	8.6388	THBD	thrombomodulin [Source:HGNC Symbol;Acc:HGNC:11784]
ENSOARG00000001878	47.1502	42.1026	9.67737	-	Uncharacterized protein [Source:UniProtKB/TrEMBL;Acc:W5NUX8]
ENSOARG00000016570	44.3291	33.2364	14.3126	IL13RA1	interleukin 13 receptor, alpha 1 [Source:HGNC Symbol;Acc:HGNC:5974]
ENSOARG00000000058	41.9253	54.6739	15.1594	-	Uncharacterized protein [Source:UniProtKB/TrEMBL;Acc:W5NPE8]
ENSOARG00000009973	35.1222	37.8049	12.8871	EMILIN2	elastin microfibril interfacer 2 [Source:HGNC Symbol;Acc:HGNC:19881]
ENSOARG00000001755	31.3072	29.2888	6.33368	-	Uncharacterized protein [Source:UniProtKB/TrEMBL;Acc:W5NUJ7]
ENSOARG00000020233	30.6031	25.2956	7.28413	HEG1	heart development protein with EGF-like domains 1 [Source:HGNC Symbol;Acc:HGNC:29227]
ENSOARG00000013144	27.0784	22.7062	8.4043	IL1R1	interleukin 1 receptor, type I [Source:HGNC Symbol;Acc:HGNC:5993]
ENSOARG00000016047	25.4747	29.205	6.94327	TGFBR3	transforming growth factor, beta receptor III [Source:HGNC Symbol;Acc:HGNC:11774]
Novel00118	24.1168	34.3259	6.11169
ENSOARG00000007525	23.9432	29.6904	7.9356	AXL	AXL receptor tyrosine kinase [Source:HGNC Symbol;Acc:HGNC:905]
ENSOARG00000007932	21.7951	28.0562	6.6049	AIF1	allograft inflammatory factor 1 [Source:HGNC Symbol;Acc:HGNC:352]
ENSOARG00000004298	20.5848	30.4289	6.07748	-	Uncharacterized protein [Source:UniProtKB/TrEMBL;Acc:W5P2F1]
ENSOARG00000020788	20.1085	13.1773	5.71231	RAB8B	RAB8B, member RAS oncogene family [Source:HGNC Symbol;Acc:HGNC:30273]
ENSOARG00000005548	19.7484	15.5248	6.31648	SLC39A6	solute carrier family 39 (zinc transporter), member 6 [Source:HGNC Symbol;Acc:HGNC:18607]
ENSOARG00000006358	19.6839	27.5695	6.13038	CSF1R	colony stimulating factor 1 receptor [Source:HGNC Symbol;Acc:HGNC:2433]
ENSOARG00000008001	18.7566	22.6201	5.55907	C1QA	complement component 1, q subcomponent, A chain [Source:HGNC Symbol;Acc:HGNC:1241]
ENSOARG00000006737	17.7364	19.8954	3.75562	KCNE3	potassium channel, voltage gated subfamily E regulatory beta subunit 3 [Source:HGNC Symbol;Acc:HGNC:6243]
ENSOARG00000020622	17.5372	24.9097	6.03145	EPS8	epidermal growth factor receptor pathway substrate 8 [Source:HGNC Symbol;Acc:HGNC:3420]
Novel00805	16.8785	13.218	3.94826
ENSOARG00000009301	16.7342	22.9656	4.0314	COLEC12	collectin sub-family member 12 [Source:HGNC Symbol;Acc:HGNC:16016]
ENSOARG00000002862	16.4123	13.7177	2.76115	CD163	CD163 molecule [Source:HGNC Symbol;Acc:HGNC:1631]
ENSOARG00000002378	15.2425	19.7678	5.15679	SGCE	sarcoglycan, epsilon [Source:HGNC Symbol;Acc:HGNC:10808]
ENSOARG00000020861	15.1447	18.0827	4.39815	CTSS	cathepsin S [Source:HGNC Symbol;Acc:HGNC:2545]
ENSOARG00000009347	14.9865	11.3155	5.1372	DSE	dermatan sulfate epimerase [Source:HGNC Symbol;Acc:HGNC:21144]
ENSOARG00000002637	13.9369	14.0608	3.12278	-	Uncharacterized protein [Source:UniProtKB/TrEMBL;Acc:W5NXA8]
ENSOARG00000006760	13.2525	15.2701	4.01661	LPAR1	lysophosphatidic acid receptor 1 [Source:HGNC Symbol;Acc:HGNC:3166]
ENSOARG00000011005	13.197	14.6751	3.54857	C5AR1	complement component 5a receptor 1 [Source:HGNC Symbol;Acc:HGNC:1338]
ENSOARG00000011846	13.14	9.35239	2.8128	NTN4	netrin 4 [Source:HGNC Symbol;Acc:HGNC:13658]
ENSOARG00000017560	12.5749	17.9416	3.58179	FLRT2	fibronectin leucine rich transmembrane protein 2 [Source:HGNC Symbol;Acc:HGNC:3761]
ENSOARG00000006058	11.9315	11.9268	2.65427	-	Uncharacterized protein [Source:UniProtKB/TrEMBL;Acc:W5P7T2]
ENSOARG00000009341	11.5734	14.6833	2.1646	DKK3	dickkopf WNT signaling pathway inhibitor 3 [Source:HGNC Symbol;Acc:HGNC:2893]
ENSOARG00000010490	11.4644	9.56765	3.65281	-	Uncharacterized protein [Source:UniProtKB/TrEMBL;Acc:W5PLE0]
ENSOARG00000014364	11.0909	8.50017	1.7143
ENSOARG00000005007	10.9084	14.9639	2.34124	DACT2	dishevelled-binding antagonist of beta-catenin 2 [Source:HGNC Symbol;Acc:HGNC:21231]
ENSOARG00000007864	10.805	13.1296	3.30325	LCP1	lymphocyte cytosolic protein 1 (L-plastin) [Source:HGNC Symbol;Acc:HGNC:6528]
ENSOARG00000016153	10.6466	14.5795	2.92937	CPE	carboxypeptidase E [Source:HGNC Symbol;Acc:HGNC:2303]
ENSOARG00000018039	10.6327	9.71527	1.0777	BMP7	bone morphogenetic protein 7 [Source:HGNC Symbol;Acc:HGNC:1074]
ENSOARG00000026371	10.5729	9.71257	2.76167
ENSOARG00000005309	10.5038	8.48084	3.15669	SH3D19	SH3 domain containing 19 [Source:HGNC Symbol;Acc:HGNC:30418]
ENSOARG00000019936	10.4754	8.20925	3.25162	HIPK1	homeodomain interacting protein kinase 1 [Source:HGNC Symbol;Acc:HGNC:19006]
ENSOARG00000016547	9.67503	6.1888	2.22642	CALCRL	calcitonin receptor-like [Source:HGNC Symbol;Acc:HGNC:16709]
ENSOARG00000001094	9.60166	8.97	0.947296	ADRB3	beta-3 adrenergic receptor [Source:RefSeq peptide;Acc:NP_001153229]
ENSOARG00000016790	9.43443	8.59646	2.44533	COL14A1	collagen, type XIV, alpha 1 [Source:HGNC Symbol;Acc:HGNC:2191]
ENSOARG00000015582	9.38672	7.04387	2.7727	TBC1D4	TBC1 domain family, member 4 [Source:HGNC Symbol;Acc:HGNC:19165]
ENSOARG00000016017	9.27287	9.15519	2.8147	PDE5A	phosphodiesterase 5A, cGMP-specific [Source:HGNC Symbol;Acc:HGNC:8784]
ENSOARG00000010344	9.24861	12.8986	1.8381	LTBP1	latent transforming growth factor beta binding protein 1 [Source:HGNC Symbol;Acc:HGNC:6714]
ENSOARG00000015985	9.24132	7.41228	2.43285	AMMECR1L	AMMECR1-like [Source:HGNC Symbol;Acc:HGNC:28658]
ENSOARG00000009957	9.00266	8.14222	2.49268	CREB3L2	cAMP responsive element binding protein 3-like 2 [Source:HGNC Symbol;Acc:HGNC:23720]
ENSOARG00000010418	8.86088	4.58403	2.83512	ATF6	activating transcription factor 6 [Source:HGNC Symbol;Acc:HGNC:791]
ENSOARG00000003613	8.83448	6.46933	2.95204	UBR2	ubiquitin protein ligase E3 component n-recognin 2 [Source:HGNC Symbol;Acc:HGNC:21289]
ENSOARG00000008216	8.77396	6.42321	2.42683	PDP1	pyruvate dehyrogenase phosphatase catalytic subunit 1 [Source:HGNC Symbol;Acc:HGNC:9279]
ENSOARG00000010070	8.66529	10.1207	2.18768	-	Uncharacterized protein [Source:UniProtKB/TrEMBL;Acc:W5PK31]
ENSOARG00000004869	8.65106	4.72371	2.65039	UTP15	UTP15, U3 small nucleolar ribonucleoprotein, homolog (S. cerevisiae) [Source:HGNC Symbol;Acc:HGNC:25758]
ENSOARG00000012355	8.59173	7.63883	2.51517	WEE1	WEE1 G2 checkpoint kinase [Source:HGNC Symbol;Acc:HGNC:12761]
ENSOARG00000011857	8.42983	9.50832	2.21014	-	Uncharacterized protein [Source:UniProtKB/TrEMBL;Acc:W5PQJ2]
ENSOARG00000011660	8.39836	7.94528	1.78178	RECK	reversion-inducing-cysteine-rich protein with kazal motifs [Source:HGNC Symbol;Acc:HGNC:11345]
ENSOARG00000002263	8.2221	11.122	2.00171	SRPX2	sushi-repeat containing protein, X-linked 2 [Source:HGNC Symbol;Acc:HGNC:30668]
ENSOARG00000016193	8.10311	10.4586	1.64885	IL18	interleukin 18 [Source:HGNC Symbol;Acc:HGNC:5986]
ENSOARG00000013406	8.10007	6.16491	2.28114	AFF4	AF4/FMR2 family, member 4 [Source:HGNC Symbol;Acc:HGNC:17869]
ENSOARG00000015936	8.03745	4.59664	2.49795	UGGT1	UDP-glucose glycoprotein glucosyltransferase 1 [Source:HGNC Symbol;Acc:HGNC:15663]
ENSOARG00000019591	7.7588	4.41465	2.24034	AGO1	argonaute RISC catalytic component 1 [Source:HGNC Symbol;Acc:HGNC:3262]
ENSOARG00000007263	7.28389	9.41584	1.70284	SDSL	serine dehydratase-like [Source:HGNC Symbol;Acc:HGNC:30404]
ENSOARG00000019564	7.06759	10.0866	1.89131	TMTC1	transmembrane and tetratricopeptide repeat containing 1 [Source:HGNC Symbol;Acc:HGNC:24099]
ENSOARG00000010473	7.05959	7.1004	1.64518	EPB41L3	erythrocyte membrane protein band 4.1-like 3 [Source:HGNC Symbol;Acc:HGNC:3380]
ENSOARG00000018923	7.03049	11.4465	1.55458	PAMR1	peptidase domain containing associated with muscle regeneration 1 [Source:HGNC Symbol;Acc:HGNC:24554]
ENSOARG00000008246	6.91053	4.97663	1.99273	RB1	retinoblastoma 1 [Source:HGNC Symbol;Acc:HGNC:9884]
ENSOARG00000014486	6.71186	4.80186	1.56866	-	Uncharacterized protein [Source:UniProtKB/TrEMBL;Acc:W5PYK8]
ENSOARG00000009932	6.55073	7.31144	1.45552
ENSOARG00000020030	6.48566	5.97074	1.63817	SPRED1	sprouty-related, EVH1 domain containing 1 [Source:HGNC Symbol;Acc:HGNC:20249]
ENSOARG00000010094	6.44615	5.04229	0.78329	FCGR2B	low affinity immunoglobulin gamma Fc region receptor II-b precursor [Source:RefSeq peptide;Acc:NP_001132925]
ENSOARG00000016957	6.42054	3.89349	1.83907	N4BP1	NEDD4 binding protein 1 [Source:HGNC Symbol;Acc:HGNC:29850]
ENSOARG00000001750	6.36477	5.61252	1.84168	PEAK1	pseudopodium-enriched atypical kinase 1 [Source:HGNC Symbol;Acc:HGNC:29431]
ENSOARG00000018057	6.35354	5.9978	1.85658	RLIM	ring finger protein, LIM domain interacting [Source:HGNC Symbol;Acc:HGNC:13429]
ENSOARG00000018862	6.22832	6.61397	1.49173	FAM102B	family with sequence similarity 102, member B [Source:HGNC Symbol;Acc:HGNC:27637]
ENSOARG00000017439	6.04699	3.58646	1.13761	-	Uncharacterized protein [Source:UniProtKB/TrEMBL;Acc:W5Q7N0]
ENSOARG00000019067	5.93419	5.57443	1.35564	WNT2	wingless-type MMTV integration site family member 2 [Source:HGNC Symbol;Acc:HGNC:12780]
ENSOARG00000004497	5.80921	3.25894	1.78593	ZNF445	zinc finger protein 445 [Source:HGNC Symbol;Acc:HGNC:21018]
ENSOARG00000007814	5.68877	3.51038	1.19827	SYK	spleen tyrosine kinase [Source:HGNC Symbol;Acc:HGNC:11491]
ENSOARG00000016271	5.49363	8.11897	1.0203	HOXC4	homeobox C4 [Source:HGNC Symbol;Acc:HGNC:5126]
ENSOARG00000008550	5.33524	3.45466	1.33512	CFH	complement factor H [Source:HGNC Symbol;Acc:HGNC:4883]
ENSOARG00000017807	5.15478	6.68506	1.40138	ERAP1	endoplasmic reticulum aminopeptidase 1 [Source:HGNC Symbol;Acc:HGNC:18173]
ENSOARG00000017529	4.95033	3.52918	1.51949	CRYBG3	beta-gamma crystallin domain containing 3 [Source:HGNC Symbol;Acc:HGNC:34427]
ENSOARG00000015025	4.83372	2.65627	1.44471	CBL	Cbl proto-oncogene, E3 ubiquitin protein ligase [Source:HGNC Symbol;Acc:HGNC:1541]
ENSOARG00000011340	4.69536	3.21149	1.49779	MMP16	matrix metallopeptidase 16 (membrane-inserted) [Source:HGNC Symbol;Acc:HGNC:7162]
ENSOARG00000007758	4.57534	4.0444	1.10416	-	Uncharacterized protein [Source:UniProtKB/TrEMBL;Acc:W5PD11]
ENSOARG00000002587	4.52984	3.34937	0.937227	CLEC4G	C-type lectin domain family 4, member G [Source:HGNC Symbol;Acc:HGNC:24591]
ENSOARG00000013031	4.38331	6.45353	0.932549	TMEM255A	transmembrane protein 255A [Source:HGNC Symbol;Acc:HGNC:26086]
ENSOARG00000016893	4.23503	3.37447	1.27283	QSER1	glutamine and serine rich 1 [Source:HGNC Symbol;Acc:HGNC:26154]
ENSOARG00000010545	4.20382	3.7778	0.439846	ENPP5	ectonucleotide pyrophosphatase/phosphodiesterase 5 (putative) [Source:HGNC Symbol;Acc:HGNC:13717]
ENSOARG00000018943	4.15848	3.95931	0.919747	CYBB	cytochrome b-245, beta polypeptide [Source:HGNC Symbol;Acc:HGNC:2578]
ENSOARG00000009827	4.11245	6.38493	0.654293	VASH2	vasohibin 2 [Source:HGNC Symbol;Acc:HGNC:25723]
ENSOARG00000014330	3.98892	5.66225	0.967786	ADAMTSL3	ADAMTS-like 3 [Source:HGNC Symbol;Acc:HGNC:14633]
ENSOARG00000007679	3.8004	2.4947	0.652142	-	Uncharacterized protein [Source:UniProtKB/TrEMBL;Acc:W5PCS4]
Novel01058	3.7316	5.54311	0.830111
ENSOARG00000015276	3.69662	2.35183	0.376561	-	Uncharacterized protein [Source:UniProtKB/TrEMBL;Acc:W5Q103]
ENSOARG00000009830	3.67255	2.92153	1.21895	KMT2A	lysine (K)-specific methyltransferase 2A [Source:HGNC Symbol;Acc:HGNC:7132]
ENSOARG00000010643	3.6435	5.19096	0.811725	TIMD4	T-cell immunoglobulin and mucin domain containing 4 [Source:HGNC Symbol;Acc:HGNC:25132]
ENSOARG00000015564	3.61011	4.04911	0.688998	LRRC8B	leucine rich repeat containing 8 family, member B [Source:HGNC Symbol;Acc:HGNC:30692]
ENSOARG00000017540	3.60971	2.57946	1.11839	DIP2B	disco-interacting protein 2 homolog B [Source:HGNC Symbol;Acc:HGNC:29284]
ENSOARG00000016888	3.46455	3.68522	0.617793	IQGAP2	IQ motif containing GTPase activating protein 2 [Source:HGNC Symbol;Acc:HGNC:6111]
ENSOARG00000012515	3.38274	3.85375	0.676494	PCSK5	proprotein convertase subtilisin/kexin type 5 [Source:HGNC Symbol;Acc:HGNC:8747]
ENSOARG00000007322	3.30712	3.06775	0.518814	-	Uncharacterized protein [Source:UniProtKB/TrEMBL;Acc:W5PBN8]
ENSOARG00000007935	3.08113	2.56699	0.813683	PLA2G4A	phospholipase A2, group IVA (cytosolic, calcium-dependent) [Source:HGNC Symbol;Acc:HGNC:9035]
ENSOARG00000016899	2.851	4.37181	0.273852	TMEM132C	transmembrane protein 132C [Source:HGNC Symbol;Acc:HGNC:25436]
ENSOARG00000019840	2.58488	2.41777	0.334795	PTAFR	platelet-activating factor receptor [Source:HGNC Symbol;Acc:HGNC:9582]
ENSOARG00000012964	2.51405	2.10495	0.563806	PTAR1	protein prenyltransferase alpha subunit repeat containing 1 [Source:HGNC Symbol;Acc:HGNC:30449]
ENSOARG00000008878	2.37519	1.54744	0.162832	CD84	CD84 molecule [Source:HGNC Symbol;Acc:HGNC:1704]
ENSOARG00000020112	2.28499	2.05423	0.326571	CD86	CD86 molecule [Source:HGNC Symbol;Acc:HGNC:1705]
ENSOARG00000017511	2.23554	1.34076	0.392158	-	Uncharacterized protein [Source:UniProtKB/TrEMBL;Acc:W5Q7V3]
ENSOARG00000016115	2.03407	1.66855	0.325703	SYT9	synaptotagmin IX [Source:HGNC Symbol;Acc:HGNC:19265]
ENSOARG00000005972	2.00843	0.94287	0.198811	TNFSF15	tumor necrosis factor (ligand) superfamily, member 15 [Source:HGNC Symbol;Acc:HGNC:11931]
ENSOARG00000014260	1.99506	1.69029	0.251851	CCR1	chemokine (C-C motif) receptor 1 [Source:HGNC Symbol;Acc:HGNC:1602]
ENSOARG00000008208	1.95172	1.72715	0.153837	CR2	complement component (3d/Epstein Barr virus) receptor 2 [Source:HGNC Symbol;Acc:HGNC:2336]
ENSOARG00000021090	1.90472	0.940807	0.198298	-	Uncharacterized protein [Source:UniProtKB/TrEMBL;Acc:W5QIW3]
ENSOARG00000020393	1.77494	0.903055	0.439114	-	Lysozyme [Source:UniProtKB/TrEMBL;Acc:W5QGQ0]
ENSOARG00000010051	1.76911	1.10612	0.178604	-	Uncharacterized protein [Source:UniProtKB/TrEMBL;Acc:W5PK06]
ENSOARG00000010097	1.63242	0.696273	0.386654	CLCN5	chloride channel, voltage-sensitive 5 [Source:HGNC Symbol;Acc:HGNC:2023]
ENSOARG00000012417	1.62616	0.852568	0.160244	CD300E	CD300e molecule [Source:HGNC Symbol;Acc:HGNC:28874]
ENSOARG00000018337	1.62582	0.825622	0.0613119	CPAMD8	C3 and PZP-like, alpha-2-macroglobulin domain containing 8 [Source:HGNC Symbol;Acc:HGNC:23228]
ENSOARG00000019468	1.52059	1.02272	0.36805	KIAA2018	KIAA2018 [Source:HGNC Symbol;Acc:HGNC:30494]
ENSOARG00000020856	1.48822	0.282362	0.714434	LIPC	lipase, hepatic [Source:HGNC Symbol;Acc:HGNC:6619]
Novel00793	1.09562	0.556231	0.165989
ENSOARG00000003872	0.963559	0.384681	0.0906629	DHRS9	dehydrogenase/reductase (SDR family) member 9 [Source:HGNC Symbol;Acc:HGNC:16888]
ENSOARG00000017240	0.886275	0.284819	0.311532	HECW1	HECT, C2 and WW domain containing E3 ubiquitin protein ligase 1 [Source:HGNC Symbol;Acc:HGNC:22195]
Novel00089	0.85336	0.531231	0.144257
Novel02144	0.817745	0.0311621	0.395722
Novel02382	0.673968	0.0118867	0.28187
ENSOARG00000003437	0.620503	0.053026	0.0223576	PITX2	paired-like homeodomain 2 [Source:HGNC Symbol;Acc:HGNC:9005]

## Sheet: subcluster4
Gene_ID	SAT	VAT	TAT	Gene_Symbol	Description
ENSOARG00000003782	1761.79	3095.96	941.46	B2M	beta-2-microglobulin [Source:HGNC Symbol;Acc:HGNC:914]
ENSOARG00000018210	216.805	422.028	103.057	TIMP3	TIMP metallopeptidase inhibitor 3 [Source:HGNC Symbol;Acc:HGNC:11822]
ENSOARG00000007229	218.694	374.029	77.4859	CD74	CD74 molecule, major histocompatibility complex, class II invariant chain [Source:HGNC Symbol;Acc:HGNC:1697]
ENSOARG00000001783	219.766	365.833	116.295	FOS	FBJ murine osteosarcoma viral oncogene homolog [Source:HGNC Symbol;Acc:HGNC:3796]
ENSOARG00000000890	220.887	272.751	92.453	-
ENSOARG00000015727	160.046	253.184	90.7875	LUM	lumican [Source:HGNC Symbol;Acc:HGNC:6724]
ENSOARG00000005006	106.723	175.425	56.4705	SPARCL1	SPARC-like 1 (hevin) [Source:HGNC Symbol;Acc:HGNC:11220]
ENSOARG00000021177	66.2483	155.924	37.175	ZFP36L1	ZFP36 ring finger protein-like 1 [Source:HGNC Symbol;Acc:HGNC:1107]
ENSOARG00000005926	138.427	153.868	54.8848	PCOLCE2	procollagen C-endopeptidase enhancer 2 [Source:HGNC Symbol;Acc:HGNC:8739]
ENSOARG00000003112	76.4716	151.85	27.2036	AKAP12	A kinase (PRKA) anchor protein 12 [Source:HGNC Symbol;Acc:HGNC:370]
ENSOARG00000024209	45.1182	138.742	14.3346	H19_1	H19 conserved region 1 [Source:RFAM;Acc:RF01972]
ENSOARG00000010944	43.055	121.524	7.71972	-	Uncharacterized protein [Source:UniProtKB/TrEMBL;Acc:W5PMR1]
ENSOARG00000016610	70.0714	111.345	26.4113	HLA-DRA	major histocompatibility complex, class II, DR alpha [Source:HGNC Symbol;Acc:HGNC:4947]
ENSOARG00000011380	53.3127	106.608	32.7517	ADGRF5	adhesion G protein-coupled receptor F5 [Source:HGNC Symbol;Acc:HGNC:19030]
ENSOARG00000001968	65.7339	106.068	27.8091	MFAP5	microfibrillar associated protein 5 [Source:HGNC Symbol;Acc:HGNC:29673]
ENSOARG00000017513	67.7033	105.164	28.7155	ISLR	immunoglobulin superfamily containing leucine-rich repeat [Source:HGNC Symbol;Acc:HGNC:6133]
ENSOARG00000012784	62.6466	101.099	35.2607	HTRA3	HtrA serine peptidase 3 [Source:HGNC Symbol;Acc:HGNC:30406]
ENSOARG00000004015	53.4076	99.2154	32.5714	CD248	CD248 molecule, endosialin [Source:HGNC Symbol;Acc:HGNC:18219]
ENSOARG00000011110	43.1064	95.1373	13.8242	RGS5	regulator of G-protein signaling 5 [Source:HGNC Symbol;Acc:HGNC:10001]
ENSOARG00000002094	49.1144	80.8064	21.6325	LAPTM5	lysosomal protein transmembrane 5 [Source:HGNC Symbol;Acc:HGNC:29612]
ENSOARG00000014986	38.1261	77.9187	20.6193	CYYR1	cysteine/tyrosine-rich 1 [Source:HGNC Symbol;Acc:HGNC:16274]
ENSOARG00000004368	28.9202	72.5456	12.7686	LOXL1	lysyl oxidase-like 1 [Source:HGNC Symbol;Acc:HGNC:6665]
ENSOARG00000026131	29.2841	71.4977	6.73708
ENSOARG00000001254	45.9753	69.6986	22.431	TNXB	tenascin XB [Source:HGNC Symbol;Acc:HGNC:11976]
ENSOARG00000019963	34.1747	63.8871	17.6121	GJA1	gap junction protein, alpha 1, 43kDa [Source:HGNC Symbol;Acc:HGNC:4274]
ENSOARG00000015236	36.748	63.706	15.2498	MAFF	v-maf avian musculoaponeurotic fibrosarcoma oncogene homolog F [Source:HGNC Symbol;Acc:HGNC:6780]
ENSOARG00000012360	34.2469	63.6499	16.6552	ELK3	ELK3, ETS-domain protein (SRF accessory protein 2) [Source:HGNC Symbol;Acc:HGNC:3325]
ENSOARG00000009800	36.7914	61.5977	20.8885	FCER1G	Fc fragment of IgE, high affinity I, receptor for; gamma polypeptide [Source:HGNC Symbol;Acc:HGNC:3611]
ENSOARG00000002744	29.8309	61.1737	14.4636	-	Uncharacterized protein [Source:UniProtKB/TrEMBL;Acc:W5NXL3]
ENSOARG00000001660	31.8837	60.9027	13.8875	PRELP	proline/arginine-rich end leucine-rich repeat protein [Source:HGNC Symbol;Acc:HGNC:9357]
ENSOARG00000013157	33.1952	59.4577	20.0748	TIMP1	TIMP metallopeptidase inhibitor 1 [Source:HGNC Symbol;Acc:HGNC:11820]
ENSOARG00000012461	19.447	58.8543	7.47947	FBLN5	fibulin 5 [Source:HGNC Symbol;Acc:HGNC:3602]
ENSOARG00000008249	27.4062	58.1376	9.62697	ASPN	asporin [Source:HGNC Symbol;Acc:HGNC:14872]
ENSOARG00000009921	36.8136	53.2981	15.8156	NGFRAP1	nerve growth factor receptor (TNFRSF16) associated protein 1 [Source:HGNC Symbol;Acc:HGNC:13388]
ENSOARG00000011756	21.1131	52.6258	10.5223	HSPH1	heat shock 105kDa/110kDa protein 1 [Source:HGNC Symbol;Acc:HGNC:16969]
ENSOARG00000007175	28.8302	50.643	10.9328	-	Uncharacterized protein [Source:UniProtKB/TrEMBL;Acc:W5PB75]
ENSOARG00000014898	30.7436	49.0926	11.3902	ADAMTS1	ADAM metallopeptidase with thrombospondin type 1 motif, 1 [Source:HGNC Symbol;Acc:HGNC:217]
ENSOARG00000023986	20.1091	47.8481	4.99595	MEG3_2	Maternally expressed 3 conserved region 2 [Source:RFAM;Acc:RF01872]
ENSOARG00000006538	27.6145	44.7069	16.2179	PDGFRB	platelet-derived growth factor receptor, beta polypeptide [Source:HGNC Symbol;Acc:HGNC:8804]
ENSOARG00000003059	23.8667	44.5551	10.4452	AGPAT9	1-acylglycerol-3-phosphate O-acyltransferase 9 [Source:HGNC Symbol;Acc:HGNC:28157]
ENSOARG00000004803	26.2627	43.5354	12.7122	-	Uncharacterized protein [Source:UniProtKB/TrEMBL;Acc:W5P3Z8]
ENSOARG00000002039	27.6249	43.2341	12.4844	CMTM3	CKLF-like MARVEL transmembrane domain containing 3 [Source:HGNC Symbol;Acc:HGNC:19174]
ENSOARG00000007615	22.6928	41.6966	13.6708	-	Uncharacterized protein [Source:UniProtKB/TrEMBL;Acc:W5PCL0]
ENSOARG00000001060	27.9555	38.973	12.927	KDR	kinase insert domain receptor [Source:HGNC Symbol;Acc:HGNC:6307]
ENSOARG00000013694	24.011	37.5626	10.8164	EMCN	endomucin [Source:HGNC Symbol;Acc:HGNC:16041]
ENSOARG00000007252	17.2734	34.7741	10.6636	CD1D	CD1d molecule [Source:HGNC Symbol;Acc:HGNC:1637]
ENSOARG00000004010	19.0806	33.5107	10.4873	SNRK	SNF related kinase [Source:HGNC Symbol;Acc:HGNC:30598]
ENSOARG00000004797	20.55	32.8367	9.99768	WWTR1	WW domain containing transcription regulator 1 [Source:HGNC Symbol;Acc:HGNC:24042]
ENSOARG00000008480	7.15407	31.9013	0.326182	ALOX15	arachidonate 15-lipoxygenase [Source:HGNC Symbol;Acc:HGNC:433]
ENSOARG00000012064	15.2498	30.7727	6.37273	FIGF	c-fos induced growth factor (vascular endothelial growth factor D) [Source:HGNC Symbol;Acc:HGNC:3708]
ENSOARG00000012392	18.5825	29.1182	10.3744	MRC2	mannose receptor, C type 2 [Source:HGNC Symbol;Acc:HGNC:16875]
ENSOARG00000001650	17.6909	27.6313	9.03117	PSTPIP1	proline-serine-threonine phosphatase interacting protein 1 [Source:HGNC Symbol;Acc:HGNC:9580]
ENSOARG00000009599	9.28832	26.591	1.89983	ALDH1A3	aldehyde dehydrogenase 1 family, member A3 [Source:HGNC Symbol;Acc:HGNC:409]
ENSOARG00000001574	11.1111	25.9173	4.11715	BTG2	protein BTG2 [Source:RefSeq peptide;Acc:NP_001233139]
ENSOARG00000003130	17.1018	24.8543	6.75172	PLAT	plasminogen activator, tissue [Source:HGNC Symbol;Acc:HGNC:9051]
ENSOARG00000015412	10.8361	24.6708	4.43956	C17orf58	chromosome 17 open reading frame 58 [Source:HGNC Symbol;Acc:HGNC:27568]
ENSOARG00000002725	14.2615	23.0773	6.97807	HRASLS2	HRAS-like suppressor 2 [Source:HGNC Symbol;Acc:HGNC:17824]
ENSOARG00000019448	5.80862	22.8518	1.83641	TRDC	T cell receptor delta constant [Source:HGNC Symbol;Acc:HGNC:12253]
ENSOARG00000017205	15.132	22.6813	6.00106	TNFRSF1B	tumor necrosis factor receptor superfamily, member 1B [Source:HGNC Symbol;Acc:HGNC:11917]
Novel02348	11.5981	22.582	6.53273
ENSOARG00000009686	9.73628	22.3727	4.05639	ADAMTS4	ADAM metallopeptidase with thrombospondin type 1 motif, 4 [Source:HGNC Symbol;Acc:HGNC:220]
Novel00461	11.7451	21.6945	5.04466
ENSOARG00000008908	16.4979	20.4842	6.31044	-	Uncharacterized protein [Source:UniProtKB/TrEMBL;Acc:W5PGJ7]
ENSOARG00000012180	10.9971	19.0433	4.41622	FLT1	fms-related tyrosine kinase 1 [Source:HGNC Symbol;Acc:HGNC:3763]
ENSOARG00000007134	10.2305	18.8626	3.44176	HOXB2	homeobox B2 [Source:HGNC Symbol;Acc:HGNC:5113]
ENSOARG00000006553	10.247	18.0929	5.64442	SPI1	Spi-1 proto-oncogene [Source:HGNC Symbol;Acc:HGNC:11241]
ENSOARG00000003206	13.2982	18.0448	5.6931	CHORDC1	cysteine and histidine-rich domain (CHORD) containing 1 [Source:HGNC Symbol;Acc:HGNC:14525]
ENSOARG00000025182	10.5356	17.9353	5.18059	-	Uncharacterized protein [Source:UniProtKB/TrEMBL;Acc:W5QJA4]
ENSOARG00000020959	15.3003	17.4081	5.71694	TMOD3	tropomodulin 3 (ubiquitous) [Source:HGNC Symbol;Acc:HGNC:11873]
ENSOARG00000001634	8.8767	16.9402	2.68763	PHACTR2	phosphatase and actin regulator 2 [Source:HGNC Symbol;Acc:HGNC:20956]
ENSOARG00000002851	7.94229	16.6533	1.93035	CYP4B1	cytochrome P450, family 4, subfamily B, polypeptide 1 [Source:HGNC Symbol;Acc:HGNC:2644]
ENSOARG00000003994	12.4391	16.4149	5.02923	CTSC	cathepsin C [Source:HGNC Symbol;Acc:HGNC:2528]
ENSOARG00000020741	8.4074	16.0877	4.23061	TNFSF10	tumor necrosis factor (ligand) superfamily, member 10 [Source:HGNC Symbol;Acc:HGNC:11925]
ENSOARG00000001170	9.87452	15.9714	4.92929	LTBP2	latent transforming growth factor beta binding protein 2 [Source:HGNC Symbol;Acc:HGNC:6715]
ENSOARG00000019707	12.3491	15.8304	5.04176	ARHGAP31	Rho GTPase activating protein 31 [Source:HGNC Symbol;Acc:HGNC:29216]
ENSOARG00000000276	10.4833	15.6206	4.62502	WIPF1	WAS/WASL interacting protein family, member 1 [Source:HGNC Symbol;Acc:HGNC:12736]
ENSOARG00000011743	6.33739	14.9456	3.06401	MPEG1	macrophage expressed 1 [Source:HGNC Symbol;Acc:HGNC:29619]
ENSOARG00000012367	9.21094	14.8355	4.2826	ITGB2	integrin, beta 2 (complement component 3 receptor 3 and 4 subunit) [Source:HGNC Symbol;Acc:HGNC:6155]
ENSOARG00000015167	6.30361	14.7407	3.167	BCL2A1	BCL2-related protein A1 [Source:HGNC Symbol;Acc:HGNC:991]
ENSOARG00000010118	8.56591	14.7404	3.37786	VWA5A	von Willebrand factor A domain containing 5A [Source:HGNC Symbol;Acc:HGNC:6658]
ENSOARG00000008715	8.07487	14.6218	3.85294	MTSS1	metastasis suppressor 1 [Source:HGNC Symbol;Acc:HGNC:20443]
ENSOARG00000008285	8.18421	14.5593	2.6783	ITGA1	integrin, alpha 1 [Source:HGNC Symbol;Acc:HGNC:6134]
Novel01322	4.52709	14.3906	0.0643832
ENSOARG00000000158	7.25186	13.952	3.46705	EDNRB	endothelin receptor type B [Source:HGNC Symbol;Acc:HGNC:3180]
ENSOARG00000009058	7.44172	13.8027	3.41758	CREB5	cAMP responsive element binding protein 5 [Source:HGNC Symbol;Acc:HGNC:16844]
ENSOARG00000011842	8.1849	13.3203	3.10241	LAT2	linker for activation of T cells family, member 2 [Source:HGNC Symbol;Acc:HGNC:12749]
ENSOARG00000004506	7.04586	12.9844	3.5889	OTUD1	OTU deubiquitinase 1 [Source:HGNC Symbol;Acc:HGNC:27346]
ENSOARG00000023772	6.00364	12.9422	0.489855	SNORD75	Small nucleolar RNA SNORD75 [Source:RFAM;Acc:RF00612]
ENSOARG00000014042	7.42519	12.7472	4.28231	MYO1B	myosin IB [Source:HGNC Symbol;Acc:HGNC:7596]
ENSOARG00000016857	8.93096	12.7163	3.46234	FNBP1L	formin binding protein 1-like [Source:HGNC Symbol;Acc:HGNC:20851]
ENSOARG00000016123	7.3703	12.5843	3.54217	2017-09-06	septin 6 [Source:HGNC Symbol;Acc:HGNC:15848]
ENSOARG00000015718	4.77955	12.4541	1.73557	PTPRC	protein tyrosine phosphatase, receptor type, C [Source:HGNC Symbol;Acc:HGNC:9666]
ENSOARG00000017875	4.61922	11.5945	2.00342	COL8A1	collagen, type VIII, alpha 1 [Source:HGNC Symbol;Acc:HGNC:2215]
ENSOARG00000016937	7.33652	11.5102	2.85223	F2R	coagulation factor II (thrombin) receptor [Source:HGNC Symbol;Acc:HGNC:3537]
ENSOARG00000003319	6.71815	11.4879	3.84828	F8	coagulation factor VIII, procoagulant component [Source:HGNC Symbol;Acc:HGNC:3546]
ENSOARG00000019670	8.48796	11.217	3.45047	CTTNBP2NL	CTTNBP2 N-terminal like [Source:HGNC Symbol;Acc:HGNC:25330]
Novel02362	7.16751	11.2019	3.37187
ENSOARG00000012732	6.16877	10.6558	3.21834	CDK8	cyclin-dependent kinase 8 [Source:HGNC Symbol;Acc:HGNC:1779]
ENSOARG00000005075	7.00928	10.58	3.06749	ZNF366	zinc finger protein 366 [Source:HGNC Symbol;Acc:HGNC:18316]
ENSOARG00000020050	5.55455	10.5382	3.26332	HCLS1	hematopoietic cell-specific Lyn substrate 1 [Source:HGNC Symbol;Acc:HGNC:4844]
ENSOARG00000016257	5.77612	10.2683	1.91094	-	MHC class II DQA; Uncharacterized protein [Source:UniProtKB/TrEMBL;Acc:W1IAM8]
ENSOARG00000013573	5.84318	10.0878	2.73822	TNFAIP8L2	tumor necrosis factor, alpha-induced protein 8-like 2 [Source:HGNC Symbol;Acc:HGNC:26277]
ENSOARG00000018838	6.3068	10.0189	2.92363	KLF7	Kruppel-like factor 7 (ubiquitous) [Source:HGNC Symbol;Acc:HGNC:6350]
ENSOARG00000003585	6.6105	9.95884	3.19422	ELMO1	engulfment and cell motility 1 [Source:HGNC Symbol;Acc:HGNC:16286]
ENSOARG00000015703	1.58319	9.88517	0	-	Uncharacterized protein [Source:UniProtKB/TrEMBL;Acc:W5Q2B5]
ENSOARG00000008473	4.68727	9.82244	2.62225	PLAU	urokinase-type plasminogen activator precursor [Source:RefSeq peptide;Acc:NP_001157065]
ENSOARG00000008232	5.06238	9.67866	3.19718	GUCY1A3	guanylate cyclase 1, soluble, alpha 3 [Source:HGNC Symbol;Acc:HGNC:4685]
ENSOARG00000009256	3.56702	9.65472	0.963104	CD3G	CD3g molecule, gamma (CD3-TCR complex) [Source:HGNC Symbol;Acc:HGNC:1675]
ENSOARG00000007427	4.03424	9.36282	1.87935	EPSTI1	epithelial stromal interaction 1 (breast) [Source:HGNC Symbol;Acc:HGNC:16465]
ENSOARG00000019663	3.73757	9.36229	0.70319	PTHLH	parathyroid hormone-like hormone [Source:HGNC Symbol;Acc:HGNC:9607]
ENSOARG00000015037	4.06654	9.05706	1.95274	PAWR	PRKC, apoptosis, WT1, regulator [Source:HGNC Symbol;Acc:HGNC:8614]
ENSOARG00000015592	6.69495	8.98155	2.4089	KITLG	KIT ligand [Source:HGNC Symbol;Acc:HGNC:6343]
ENSOARG00000005792	7.67143	8.86535	2.69426	TLR4	toll-like receptor 4 [Source:HGNC Symbol;Acc:HGNC:11850]
ENSOARG00000016622	6.35805	8.85243	2.32727	FZD6	frizzled class receptor 6 [Source:HGNC Symbol;Acc:HGNC:4044]
ENSOARG00000020676	3.28032	8.75435	1.48998	RERG	RAS-like, estrogen-regulated, growth inhibitor [Source:HGNC Symbol;Acc:HGNC:15980]
ENSOARG00000002144	4.86564	8.69821	2.90186	LDLRAD4	low density lipoprotein receptor class A domain containing 4 [Source:HGNC Symbol;Acc:HGNC:1224]
ENSOARG00000020351	4.56755	8.66868	2.52722	NRROS	negative regulator of reactive oxygen species [Source:HGNC Symbol;Acc:HGNC:24613]
ENSOARG00000015432	6.28205	8.66791	2.0508	-	Uncharacterized protein [Source:UniProtKB/TrEMBL;Acc:W5Q1G8]
ENSOARG00000017265	4.66995	8.65399	2.83232	TMEM173	transmembrane protein 173 [Source:HGNC Symbol;Acc:HGNC:27962]
ENSOARG00000016510	5.08445	8.63797	2.71887	-	Uncharacterized protein [Source:UniProtKB/TrEMBL;Acc:W5Q4T7]
ENSOARG00000007603	4.65098	8.50722	2.09827	-	Uncharacterized protein [Source:UniProtKB/TrEMBL;Acc:W5PCJ3]
ENSOARG00000010631	2.91577	8.35283	1.23845	DOK2	docking protein 2, 56kDa [Source:HGNC Symbol;Acc:HGNC:2991]
Novel00365	5.22969	8.01617	1.58478
ENSOARG00000014188	6.70355	8.00003	2.39276	ENPP1	ectonucleotide pyrophosphatase/phosphodiesterase 1 [Source:HGNC Symbol;Acc:HGNC:3356]
ENSOARG00000019324	4.31462	7.94858	2.60792	INPP5D	inositol polyphosphate-5-phosphatase, 145kDa [Source:HGNC Symbol;Acc:HGNC:6079]
ENSOARG00000011738	5.61939	7.36571	2.0274	-	Uncharacterized protein [Source:UniProtKB/TrEMBL;Acc:W5PQ53]
ENSOARG00000004812	5.71755	7.36067	2.14817	FERMT3	fermitin family member 3 [Source:HGNC Symbol;Acc:HGNC:23151]
ENSOARG00000014085	1.5526	7.22258	0.119354	SH2D1A	SH2 domain containing 1A [Source:HGNC Symbol;Acc:HGNC:10820]
ENSOARG00000014762	3.50201	7.20436	1.95251	AFAP1L2	actin filament associated protein 1-like 2 [Source:HGNC Symbol;Acc:HGNC:25901]
ENSOARG00000013298	4.05365	7.18774	1.98642	OLFML2A	olfactomedin-like 2A [Source:HGNC Symbol;Acc:HGNC:27270]
ENSOARG00000007984	3.08401	7.11675	1.17059	NR4A2	nuclear receptor subfamily 4, group A, member 2 [Source:HGNC Symbol;Acc:HGNC:7981]
ENSOARG00000002223	6.92392	7.11139	2.51997	MYOF	myoferlin [Source:HGNC Symbol;Acc:HGNC:3656]
ENSOARG00000013529	3.89611	7.07669	2.35343	ADGRL4	adhesion G protein-coupled receptor L4 [Source:HGNC Symbol;Acc:HGNC:20822]
ENSOARG00000001509	5.24426	6.94186	1.8564	ARHGAP4	Rho GTPase activating protein 4 [Source:HGNC Symbol;Acc:HGNC:674]
ENSOARG00000017034	4.59303	6.93357	1.9827	STK17A	serine/threonine kinase 17a [Source:HGNC Symbol;Acc:HGNC:11395]
ENSOARG00000011944	3.32021	6.89332	1.55055	SIT1	signaling threshold regulating transmembrane adaptor 1 [Source:HGNC Symbol;Acc:HGNC:17710]
ENSOARG00000016642	3.2204	6.69804	1.83425	ITGB7	integrin, beta 7 [Source:HGNC Symbol;Acc:HGNC:6162]
ENSOARG00000008802	6.09628	6.59451	2.16002	SSH2	slingshot protein phosphatase 2 [Source:HGNC Symbol;Acc:HGNC:30580]
ENSOARG00000015974	3.73815	6.50714	1.61081	SLC15A3	solute carrier family 15 (oligopeptide transporter), member 3 [Source:HGNC Symbol;Acc:HGNC:18068]
ENSOARG00000012299	3.95385	6.47129	2.10562	TLE1	transducin-like enhancer of split 1 (E(sp1) homolog, Drosophila) [Source:HGNC Symbol;Acc:HGNC:11837]
ENSOARG00000018775	3.65881	6.38444	1.01139	CBLB	Cbl proto-oncogene B, E3 ubiquitin protein ligase [Source:HGNC Symbol;Acc:HGNC:1542]
ENSOARG00000000344	3.1199	6.38062	1.2416	PLXDC2	plexin domain containing 2 [Source:HGNC Symbol;Acc:HGNC:21013]
ENSOARG00000009399	4.54585	6.25997	1.83287	ARHGAP30	Rho GTPase activating protein 30 [Source:HGNC Symbol;Acc:HGNC:27414]
ENSOARG00000001497	4.27667	6.2494	1.60395	TES	testin LIM domain protein [Source:HGNC Symbol;Acc:HGNC:14620]
ENSOARG00000012274	2.9352	6.13253	1.44164	TBXA2R	thromboxane A2 receptor [Source:HGNC Symbol;Acc:HGNC:11608]
ENSOARG00000006995	4.68425	6.11505	1.85294	FCHSD2	FCH and double SH3 domains 2 [Source:HGNC Symbol;Acc:HGNC:29114]
ENSOARG00000020889	4.96674	6.06768	1.74835	NEDD4	neural precursor cell expressed, developmentally down-regulated 4, E3 ubiquitin protein ligase [Source:HGNC Symbol;Acc:HGNC:7727]
ENSOARG00000019286	2.77853	6.04166	1.27583	PARVG	parvin, gamma [Source:HGNC Symbol;Acc:HGNC:14654]
ENSOARG00000018260	3.10868	6.02116	1.47133	ST8SIA4	ST8 alpha-N-acetyl-neuraminide alpha-2,8-sialyltransferase 4 [Source:HGNC Symbol;Acc:HGNC:10871]
ENSOARG00000016505	3.60267	5.98535	2.02779	CPT1A	carnitine O-palmitoyltransferase 1, liver isoform [Source:RefSeq peptide;Acc:NP_001009414]
ENSOARG00000014926	3.42098	5.88219	1.11993	ADGRD1	adhesion G protein-coupled receptor D1 [Source:HGNC Symbol;Acc:HGNC:19893]
ENSOARG00000021147	3.39458	5.83102	1.97194	SYNE2	spectrin repeat containing, nuclear envelope 2 [Source:HGNC Symbol;Acc:HGNC:17084]
ENSOARG00000003908	5.13718	5.8303	1.85022	IRF5	interferon regulatory factor 5 [Source:HGNC Symbol;Acc:HGNC:6120]
ENSOARG00000007849	2.691	5.75217	0.709193	PLEKHB1	pleckstrin homology domain containing, family B (evectins) member 1 [Source:HGNC Symbol;Acc:HGNC:19079]
ENSOARG00000007971	2.70191	5.60748	0.480645	CD55	CD55 molecule, decay accelerating factor for complement (Cromer blood group) [Source:HGNC Symbol;Acc:HGNC:2665]
ENSOARG00000010543	3.85195	5.55052	1.63106	PREX1	phosphatidylinositol-3,4,5-trisphosphate-dependent Rac exchange factor 1 [Source:HGNC Symbol;Acc:HGNC:32594]
ENSOARG00000005795	2.75945	5.48179	1.61525	DTNA	dystrobrevin, alpha [Source:HGNC Symbol;Acc:HGNC:3057]
ENSOARG00000003991	2.51544	5.47289	0.811324	EVI2B	ecotropic viral integration site 2B [Source:HGNC Symbol;Acc:HGNC:3500]
ENSOARG00000011217	3.83168	5.29139	1.2484	SLC37A2	solute carrier family 37 (glucose-6-phosphate transporter), member 2 [Source:HGNC Symbol;Acc:HGNC:20644]
ENSOARG00000004086	3.34675	5.24861	1.00081	BICC1	BicC family RNA binding protein 1 [Source:HGNC Symbol;Acc:HGNC:19351]
ENSOARG00000000155	3.07752	5.21938	0.988483	CPM	carboxypeptidase M [Source:HGNC Symbol;Acc:HGNC:2311]
ENSOARG00000014750	2.00705	5.20075	0.632983	STK17B	serine/threonine kinase 17b [Source:HGNC Symbol;Acc:HGNC:11396]
ENSOARG00000007906	3.42731	5.19456	1.50609	-	Uncharacterized protein [Source:UniProtKB/TrEMBL;Acc:W5PDG9]
ENSOARG00000025194	3.22446	5.19034	1.22723	ARL4C	ADP-ribosylation factor-like protein 4C [Source:RefSeq peptide;Acc:NP_001156026]
ENSOARG00000021097	5.1603	5.17311	1.42105	PELI2	pellino E3 ubiquitin protein ligase family member 2 [Source:HGNC Symbol;Acc:HGNC:8828]
ENSOARG00000015035	2.46032	4.99356	1.2026	PDE7B	phosphodiesterase 7B [Source:HGNC Symbol;Acc:HGNC:8792]
ENSOARG00000017976	3.06866	4.9189	1.56952	ATP2A3	ATPase, Ca++ transporting, ubiquitous [Source:HGNC Symbol;Acc:HGNC:813]
ENSOARG00000013374	3.94037	4.8025	1.69143	CAPN5	calpain 5 [Source:HGNC Symbol;Acc:HGNC:1482]
ENSOARG00000003254	3.16692	4.77971	1.28717	THEMIS2	thymocyte selection associated family member 2 [Source:HGNC Symbol;Acc:HGNC:16839]
ENSOARG00000002832	2.50596	4.76915	1.28945	-	Uncharacterized protein [Source:UniProtKB/TrEMBL;Acc:W5NXV9]
ENSOARG00000018510	2.80116	4.67541	0.971878	SNCA	synuclein, alpha (non A4 component of amyloid precursor) [Source:HGNC Symbol;Acc:HGNC:11138]
ENSOARG00000003148	2.63608	4.66982	1.2562	ZBTB2	zinc finger and BTB domain containing 2 [Source:HGNC Symbol;Acc:HGNC:20868]
ENSOARG00000015177	2.26151	4.56101	1.33253	IFIT1	interferon-induced protein with tetratricopeptide repeats 1 [Source:HGNC Symbol;Acc:HGNC:5407]
ENSOARG00000015578	1.92479	4.52847	0.649685	LRRC8C	leucine rich repeat containing 8 family, member C [Source:HGNC Symbol;Acc:HGNC:25075]
ENSOARG00000010664	1.78959	4.51348	0.789326	MID1	midline 1 [Source:HGNC Symbol;Acc:HGNC:7095]
ENSOARG00000004403	3.2535	4.11316	1.32093	ARID5B	AT rich interactive domain 5B (MRF1-like) [Source:HGNC Symbol;Acc:HGNC:17362]
ENSOARG00000017020	2.61048	4.03258	0.529575	-	Uncharacterized protein [Source:UniProtKB/TrEMBL;Acc:W5Q6C9]
ENSOARG00000016480	3.56548	3.99728	0.857452	LVRN	laeverin [Source:HGNC Symbol;Acc:HGNC:26904]
ENSOARG00000020214	1.74374	3.99358	1.32436	KALRN	kalirin, RhoGEF kinase [Source:HGNC Symbol;Acc:HGNC:4814]
ENSOARG00000002973	1.63848	3.97748	0.576395	KCNN3	potassium channel, calcium activated intermediate/small conductance subfamily N alpha, member 3 [Source:HGNC Symbol;Acc:HGNC:6292]
ENSOARG00000002699	1.98467	3.95185	0.693023	TNFSF14	tumor necrosis factor (ligand) superfamily, member 14 [Source:HGNC Symbol;Acc:HGNC:11930]
ENSOARG00000016922	2.78767	3.94126	1.28124	CASP8	caspase 8, apoptosis-related cysteine peptidase [Source:HGNC Symbol;Acc:HGNC:1509]
ENSOARG00000007625	3.00048	3.93874	0.681397	IL10RA	interleukin 10 receptor, alpha [Source:HGNC Symbol;Acc:HGNC:5964]
ENSOARG00000005721	2.45138	3.92946	0.883584	SLA	Src-like-adaptor [Source:HGNC Symbol;Acc:HGNC:10902]
ENSOARG00000008057	2.53431	3.92507	1.21958	TLR3	toll-like receptor 3 [Source:HGNC Symbol;Acc:HGNC:11849]
ENSOARG00000014288	2.17896	3.88562	1.07294	FGD2	FYVE, RhoGEF and PH domain containing 2 [Source:HGNC Symbol;Acc:HGNC:3664]
ENSOARG00000017199	2.59704	3.87414	1.08417	ADCY7	adenylate cyclase 7 [Source:HGNC Symbol;Acc:HGNC:238]
ENSOARG00000016548	3.26433	3.83649	0.860767	KCNK5	potassium channel, two pore domain subfamily K, member 5 [Source:HGNC Symbol;Acc:HGNC:6280]
Novel00341	1.9021	3.83077	0.981077
ENSOARG00000006029	2.37605	3.82993	0.965757	GMFG	glia maturation factor, gamma [Source:HGNC Symbol;Acc:HGNC:4374]
ENSOARG00000000810	2.87882	3.81314	0.831094	NHSL1	NHS-like 1 [Source:HGNC Symbol;Acc:HGNC:21021]
ENSOARG00000015285	2.44006	3.681	0.789401	TMTC2	transmembrane and tetratricopeptide repeat containing 2 [Source:HGNC Symbol;Acc:HGNC:25440]
ENSOARG00000004983	2.1851	3.66599	1.00588	VAV1	vav 1 guanine nucleotide exchange factor [Source:HGNC Symbol;Acc:HGNC:12657]
ENSOARG00000007830	2.66396	3.66464	1.1125	ANKRD29	ankyrin repeat domain 29 [Source:HGNC Symbol;Acc:HGNC:27110]
ENSOARG00000018615	2.76101	3.61578	1.02927	SAMD9	sterile alpha motif domain containing 9 [Source:HGNC Symbol;Acc:HGNC:1348]
ENSOARG00000007395	1.87085	3.58097	0.90469	TRPC6	transient receptor potential cation channel, subfamily C, member 6 [Source:HGNC Symbol;Acc:HGNC:12338]
ENSOARG00000018226	2.98825	3.47577	0.96477	RAPH1	Ras association (RalGDS/AF-6) and pleckstrin homology domains 1 [Source:HGNC Symbol;Acc:HGNC:14436]
ENSOARG00000008189	2.41748	3.46628	0.701916	PKIB	protein kinase (cAMP-dependent, catalytic) inhibitor beta [Source:HGNC Symbol;Acc:HGNC:9018]
ENSOARG00000020215	3.2085	3.40987	0.733172	-	Uncharacterized protein [Source:UniProtKB/TrEMBL;Acc:W5QG57]
ENSOARG00000021005	1.45018	3.37565	0.610516	-	Uncharacterized protein [Source:UniProtKB/TrEMBL;Acc:W5QIM1]
ENSOARG00000019218	2.12751	3.32735	0.953073	CYTH4	cytohesin 4 [Source:HGNC Symbol;Acc:HGNC:9505]
ENSOARG00000009045	1.79653	3.08939	0.799168	FRMD3	FERM domain containing 3 [Source:HGNC Symbol;Acc:HGNC:24125]
ENSOARG00000009234	2.67501	3.08556	0.711557	AHR	aryl hydrocarbon receptor [Source:HGNC Symbol;Acc:HGNC:348]
ENSOARG00000010448	1.68222	3.0743	0.370234	ERBB3	erb-b2 receptor tyrosine kinase 3 [Source:HGNC Symbol;Acc:HGNC:3431]
ENSOARG00000011239	1.57719	3.06423	0.100707	IL7R	interleukin 7 receptor [Source:HGNC Symbol;Acc:HGNC:6024]
ENSOARG00000009905	3.19733	3.00372	0.806517	MBOAT1	membrane bound O-acyltransferase domain containing 1 [Source:HGNC Symbol;Acc:HGNC:21579]
ENSOARG00000002475	1.54	2.91739	0.198515	PEG10	retrotransposon-derived protein PEG10 [Source:RefSeq peptide;Acc:NP_001277722]
Novel01927	1.29337	2.91314	0.803516
ENSOARG00000015246	1.83518	2.89674	0.734415	ANKRD44	ankyrin repeat domain 44 [Source:HGNC Symbol;Acc:HGNC:25259]
ENSOARG00000001535	1.62446	2.86633	0.643891	-	Uncharacterized protein [Source:UniProtKB/TrEMBL;Acc:W5NTV9]
ENSOARG00000019463	2.88909	2.86424	0.63896	CD53	CD53 molecule [Source:RefSeq peptide;Acc:NP_001269176]
ENSOARG00000016290	0.97239	2.85454	1.08121
ENSOARG00000000085	2.12039	2.8138	0.468327	ARHGAP28	Rho GTPase activating protein 28 [Source:HGNC Symbol;Acc:HGNC:25509]
ENSOARG00000016338	1.71815	2.81317	0.369207	HS3ST2	heparan sulfate (glucosamine) 3-O-sulfotransferase 2 [Source:HGNC Symbol;Acc:HGNC:5195]
ENSOARG00000016739	1.19594	2.77544	0.617247	-	Uncharacterized protein [Source:UniProtKB/TrEMBL;Acc:W5Q5J3]
ENSOARG00000009000	2.73377	2.68895	0.634583	ITGAM	integrin alpha-M precursor [Source:RefSeq peptide;Acc:NP_001076062]
ENSOARG00000002479	2.01007	2.68427	0.766197	PIK3R5	phosphoinositide-3-kinase, regulatory subunit 5 [Source:HGNC Symbol;Acc:HGNC:30035]
ENSOARG00000002700	1.22971	2.67983	0.773453	-	Uncharacterized protein [Source:UniProtKB/TrEMBL;Acc:W5NXH3]
ENSOARG00000015044	2.82984	2.67049	0.592732	TLR2	toll-like receptor 2 [Source:HGNC Symbol;Acc:HGNC:11848]
ENSOARG00000014822	1.25859	2.66238	0.352792	IKZF1	IKAROS family zinc finger 1 (Ikaros) [Source:HGNC Symbol;Acc:HGNC:13176]
ENSOARG00000012362	1.9087	2.64408	0.398694	TC2N	tandem C2 domains, nuclear [Source:HGNC Symbol;Acc:HGNC:19859]
ENSOARG00000003358	1.11717	2.63473	0.703046	TRERF1	transcriptional regulating factor 1 [Source:HGNC Symbol;Acc:HGNC:18273]
ENSOARG00000020761	1.43295	2.62235	0.350119	TNIK	TRAF2 and NCK interacting kinase [Source:HGNC Symbol;Acc:HGNC:30765]
ENSOARG00000006591	0.852803	2.61675	0.797707	ARHGAP9	Rho GTPase activating protein 9 [Source:HGNC Symbol;Acc:HGNC:14130]
ENSOARG00000026090	1.12233	2.60675	0.442093
ENSOARG00000020818	1.39485	2.57749	0.516573	PSD4	pleckstrin and Sec7 domain containing 4 [Source:HGNC Symbol;Acc:HGNC:19096]
ENSOARG00000000405	1.38281	2.57436	0.698151	PPP1R16B	protein phosphatase 1, regulatory subunit 16B [Source:HGNC Symbol;Acc:HGNC:15850]
ENSOARG00000002099	2.09171	2.56276	0.552538	-	Uncharacterized protein [Source:UniProtKB/TrEMBL;Acc:W5NVL4]
ENSOARG00000007690	2.27943	2.56221	0.625529	S1PR3	sphingosine-1-phosphate receptor 3 [Source:HGNC Symbol;Acc:HGNC:3167]
ENSOARG00000017465	1.88383	2.55298	0.647982	AMOT	angiomotin [Source:HGNC Symbol;Acc:HGNC:17810]
ENSOARG00000012373	1.67589	2.50207	0.717232	ADAM19	ADAM metallopeptidase domain 19 [Source:HGNC Symbol;Acc:HGNC:197]
ENSOARG00000013446	1.63618	2.49109	0.71762	SFMBT2	Scm-like with four mbt domains 2 [Source:HGNC Symbol;Acc:HGNC:20256]
ENSOARG00000008161	1.17296	2.4905	0.655055	FGD3	FYVE, RhoGEF and PH domain containing 3 [Source:HGNC Symbol;Acc:HGNC:16027]
ENSOARG00000002714	1.86622	2.48257	0.380211	-	Uncharacterized protein [Source:UniProtKB/TrEMBL;Acc:W5NXI2]
ENSOARG00000020160	1.61464	2.46171	0.737177	PARP14	poly (ADP-ribose) polymerase family, member 14 [Source:HGNC Symbol;Acc:HGNC:29232]
ENSOARG00000013317	1.62279	2.4597	0.462913	TBX18	T-box 18 [Source:HGNC Symbol;Acc:HGNC:11595]
ENSOARG00000002422	1.27283	2.4475	0.486001	-	Uncharacterized protein [Source:UniProtKB/TrEMBL;Acc:W5NWL9]
ENSOARG00000014774	1.10504	2.42494	0.416971	SOX10	SRY (sex determining region Y)-box 10 [Source:HGNC Symbol;Acc:HGNC:11190]
ENSOARG00000003707	0.738922	2.42309	0.783456	-	Uncharacterized protein [Source:UniProtKB/TrEMBL;Acc:W5P0K9]
ENSOARG00000025464	0.921041	2.41884	0.294555
ENSOARG00000012532	1.01075	2.36459	0.473038	DNASE1L3	deoxyribonuclease I-like 3 [Source:HGNC Symbol;Acc:HGNC:2959]
ENSOARG00000014023	0.887136	2.36089	0.303302	CCR8	chemokine (C-C motif) receptor 8 [Source:HGNC Symbol;Acc:HGNC:1609]
Novel00399	1.28515	2.34785	0.57007
ENSOARG00000009914	2.42651	2.34549	0.586305	FRMD4B	FERM domain containing 4B [Source:HGNC Symbol;Acc:HGNC:24886]
ENSOARG00000014875	1.38691	2.30834	0.497091	-	Uncharacterized protein [Source:UniProtKB/TrEMBL;Acc:W5PZS1]
ENSOARG00000016133	1.63292	2.29189	0.416534	NCKAP1L	NCK-associated protein 1-like [Source:HGNC Symbol;Acc:HGNC:4862]
ENSOARG00000008262	2.06699	2.15886	0.501308	SCN2B	sodium channel, voltage gated, type II beta subunit [Source:HGNC Symbol;Acc:HGNC:10589]
ENSOARG00000003028	1.20717	2.12228	0.301093	DOCK2	dedicator of cytokinesis 2 [Source:HGNC Symbol;Acc:HGNC:2988]
ENSOARG00000019503	1.28599	2.11812	0.404348	CAPRIN2	caprin family member 2 [Source:HGNC Symbol;Acc:HGNC:21259]
ENSOARG00000003268	1.9367	2.11468	0.285588	NAALAD2	N-acetylated alpha-linked acidic dipeptidase 2 [Source:HGNC Symbol;Acc:HGNC:14526]
ENSOARG00000001397	1.52529	2.10986	0.278213	ADGRG6	adhesion G protein-coupled receptor G6 [Source:HGNC Symbol;Acc:HGNC:13841]
ENSOARG00000007944	0.72422	2.09901	0.244505	SLAMF8	SLAM family member 8 [Source:HGNC Symbol;Acc:HGNC:21391]
Novel01889	0.718916	2.08307	0.266166	--	hypothetical protein GLOINDRAFT_338796 [Rhizophagus irregularis DAOM 181602]>gi|595443885|gb|EXX55266.1| hypothetical protein RirG_226910 [Rhizophagus irregularis DAOM 197198w]
ENSOARG00000008526	1.7468	2.06727	0.509638	PIK3AP1	phosphoinositide-3-kinase adaptor protein 1 [Source:HGNC Symbol;Acc:HGNC:30034]
ENSOARG00000008349	1.65816	2.0484	0.291763	TACSTD2	tumor-associated calcium signal transducer 2 [Source:HGNC Symbol;Acc:HGNC:11530]
ENSOARG00000007763	1.23484	2.00581	0.516171	ETV1	ets variant 1 [Source:HGNC Symbol;Acc:HGNC:3490]
ENSOARG00000017420	1.2806	1.99939	0.499942	GLI3	GLI family zinc finger 3 [Source:HGNC Symbol;Acc:HGNC:4319]
Novel01784	1.27385	1.98091	0.570592
ENSOARG00000017631	1.04439	1.9793	0.225742	PRKCB	protein kinase C, beta [Source:HGNC Symbol;Acc:HGNC:9395]
ENSOARG00000020885	1.52828	1.9646	0.530375	RFX7	regulatory factor X, 7 [Source:HGNC Symbol;Acc:HGNC:25777]
ENSOARG00000017108	0.934228	1.91173	0.246763	GRAP2	GRB2-related adaptor protein 2 [Source:HGNC Symbol;Acc:HGNC:4563]
Novel00840	1.12369	1.89896	0.0529804
ENSOARG00000016867	1.01971	1.88781	0.286344	ITGA4	integrin, alpha 4 (antigen CD49D, alpha 4 subunit of VLA-4 receptor) [Source:HGNC Symbol;Acc:HGNC:6140]
ENSOARG00000008967	0.698114	1.86053	0.325386	SLAMF7	SLAM family member 7 [Source:HGNC Symbol;Acc:HGNC:21394]
ENSOARG00000017892	0.411192	1.847	0.354697	P2RX1	purinergic receptor P2X, ligand gated ion channel, 1 [Source:HGNC Symbol;Acc:HGNC:8533]
ENSOARG00000006007	0.792852	1.83713	0.276966	NGFR	nerve growth factor receptor [Source:HGNC Symbol;Acc:HGNC:7809]
ENSOARG00000005365	0.953912	1.7847	0.255145	FHOD3	formin homology 2 domain containing 3 [Source:HGNC Symbol;Acc:HGNC:26178]
Novel01168	1.29856	1.76212	0.517654
ENSOARG00000015144	1.74305	1.7571	0.183938	SERPINA5	serpin peptidase inhibitor, clade A (alpha-1 antiproteinase, antitrypsin), member 5 [Source:HGNC Symbol;Acc:HGNC:8723]
ENSOARG00000004469	1.12548	1.74231	0.432928	TAGAP	T-cell activation RhoGTPase activating protein [Source:HGNC Symbol;Acc:HGNC:15669]
ENSOARG00000015348	0.558683	1.70024	0.142334	GPR171	G protein-coupled receptor 171 [Source:HGNC Symbol;Acc:HGNC:30057]
ENSOARG00000020964	0.556728	1.6853	0.116565	-	Uncharacterized protein [Source:UniProtKB/TrEMBL;Acc:W5QIH7]
ENSOARG00000019142	0.710125	1.67848	0.289782	SHCBP1L	SHC SH2-domain binding protein 1-like [Source:HGNC Symbol;Acc:HGNC:16788]
ENSOARG00000013509	0.714306	1.67727	0.285145	CD274	CD274 molecule [Source:HGNC Symbol;Acc:HGNC:17635]
ENSOARG00000005056	1.26496	1.64884	0.193278	CDH19	cadherin 19, type 2 [Source:HGNC Symbol;Acc:HGNC:1758]
Novel00990	0.667126	1.63331	0.381393
ENSOARG00000013367	0.825939	1.62778	0.296902	CECR1	cat eye syndrome chromosome region, candidate 1 [Source:HGNC Symbol;Acc:HGNC:1839]
ENSOARG00000020657	0.734982	1.62431	0.224013	LAMP3	lysosomal-associated membrane protein 3 [Source:HGNC Symbol;Acc:HGNC:14582]
ENSOARG00000013173	0.823878	1.59712	0.22217	DOCK8	dedicator of cytokinesis 8 [Source:HGNC Symbol;Acc:HGNC:19191]
ENSOARG00000001138	1.00706	1.56368	0.403233	HERC6	HECT and RLD domain containing E3 ubiquitin protein ligase family member 6 [Source:HGNC Symbol;Acc:HGNC:26072]
ENSOARG00000020437	0.90543	1.56227	0.369168	DOCK10	dedicator of cytokinesis 10 [Source:HGNC Symbol;Acc:HGNC:23479]
ENSOARG00000002820	1.31389	1.55647	0.46586	HCK	HCK proto-oncogene, Src family tyrosine kinase [Source:HGNC Symbol;Acc:HGNC:4840]
ENSOARG00000009108	1.04834	1.53023	0.381929	KANK4	KN motif and ankyrin repeat domains 4 [Source:HGNC Symbol;Acc:HGNC:27263]
ENSOARG00000014214	0.851164	1.50099	0.126996	CCR5	chemokine (C-C motif) receptor 5 (gene/pseudogene) [Source:HGNC Symbol;Acc:HGNC:1606]
ENSOARG00000002143	0.680537	1.49814	0.231485	-	Uncharacterized protein [Source:UniProtKB/TrEMBL;Acc:W5NVR0]
ENSOARG00000006301	0.602425	1.49704	0.207637	CD4	T-cell surface glycoprotein CD4 precursor [Source:RefSeq peptide;Acc:NP_001123374]
ENSOARG00000017838	0.363601	1.48668	0.43997	AMPH	amphiphysin [Source:HGNC Symbol;Acc:HGNC:471]
ENSOARG00000000070	0.476031	1.4843	0.0947478	-	Uncharacterized protein [Source:UniProtKB/TrEMBL;Acc:W5NPF8]
ENSOARG00000010318	0.510503	1.47147	0.171663	SVOPL	SVOP-like [Source:HGNC Symbol;Acc:HGNC:27034]
ENSOARG00000003844	1.32656	1.47035	0.302968	NOX4	NADPH oxidase 4 [Source:HGNC Symbol;Acc:HGNC:7891]
ENSOARG00000020966	0.84381	1.45054	0.207053	SCG3	secretogranin III [Source:HGNC Symbol;Acc:HGNC:13707]
ENSOARG00000005236	1.05802	1.44626	0.159493	VSIG4	V-set and immunoglobulin domain containing 4 [Source:HGNC Symbol;Acc:HGNC:17032]
ENSOARG00000009174	0.345069	1.4361	0.680847	-	Uncharacterized protein [Source:UniProtKB/TrEMBL;Acc:W5PHC7]
ENSOARG00000001964	0.43094	1.39322	0.194344	NUP210	nucleoporin 210kDa [Source:HGNC Symbol;Acc:HGNC:30052]
ENSOARG00000007256	0.588793	1.38429	0.37524	CCDC88B	coiled-coil domain containing 88B [Source:HGNC Symbol;Acc:HGNC:26757]
ENSOARG00000008380	0.596019	1.37312	0.031737	RAB6B	RAB6B, member RAS oncogene family [Source:HGNC Symbol;Acc:HGNC:14902]
ENSOARG00000014582	0.358416	1.35184	0.144128	FASLG	Fas ligand (TNF superfamily, member 6) [Source:HGNC Symbol;Acc:HGNC:11936]
ENSOARG00000005711	0.171913	1.3415	0.169244	COL13A1	collagen, type XIII, alpha 1 [Source:HGNC Symbol;Acc:HGNC:2190]
ENSOARG00000003587	0.588374	1.33452	0.233085	CERS4	ceramide synthase 4 [Source:HGNC Symbol;Acc:HGNC:23747]
ENSOARG00000010521	0.853919	1.33446	0.159166	PDE4B	phosphodiesterase 4B, cAMP-specific [Source:HGNC Symbol;Acc:HGNC:8781]
ENSOARG00000011768	0.486351	1.2991	0.136151	CYFIP2	cytoplasmic FMR1 interacting protein 2 [Source:HGNC Symbol;Acc:HGNC:13760]
ENSOARG00000008468	0.300544	1.28984	0.10968	EMB	embigin [Source:HGNC Symbol;Acc:HGNC:30465]
ENSOARG00000009682	1.37625	1.27601	0.318765	RICTOR	RPTOR independent companion of MTOR, complex 2 [Source:HGNC Symbol;Acc:HGNC:28611]
ENSOARG00000002450	0.231816	1.27038	0.222192	-	Uncharacterized protein [Source:UniProtKB/TrEMBL;Acc:W5NWQ3]
ENSOARG00000018227	1.1713	1.25187	0.302017	WSCD2	WSC domain containing 2 [Source:HGNC Symbol;Acc:HGNC:29117]
ENSOARG00000008861	0.174111	1.24823	0.175312	SLAMF6	SLAM family member 6 [Source:HGNC Symbol;Acc:HGNC:21392]
Novel00044	0.69825	1.22677	0.154764
ENSOARG00000010410	0.927236	1.2209	0.167262	SP4	Sp4 transcription factor [Source:HGNC Symbol;Acc:HGNC:11209]
ENSOARG00000013669	0.309924	1.20105	0.177671	NPY1R	neuropeptide Y receptor Y1 [Source:HGNC Symbol;Acc:HGNC:7956]
ENSOARG00000001980	0.641908	1.19654	0.269067	NLRC3	NLR family, CARD domain containing 3 [Source:HGNC Symbol;Acc:HGNC:29889]
ENSOARG00000015701	0.147677	1.18532	0.187661	-	Uncharacterized protein [Source:UniProtKB/TrEMBL;Acc:W5Q2B4]
ENSOARG00000011146	0.468649	1.18331	0.155001	PADI2	peptidyl arginine deiminase, type II [Source:HGNC Symbol;Acc:HGNC:18341]
Novel01876	0.206007	1.18144	0.110335
ENSOARG00000013918	0.343696	1.17101	0.272877	IL12RB1	interleukin 12 receptor, beta 1 [Source:HGNC Symbol;Acc:HGNC:5971]
ENSOARG00000018894	0.135847	1.15704	0.282907	IL21R	interleukin 21 receptor [Source:HGNC Symbol;Acc:HGNC:6006]
ENSOARG00000013482	0.160989	1.14981	0.0515884	MYRF	myelin regulatory factor [Source:HGNC Symbol;Acc:HGNC:1181]
ENSOARG00000015172	0.364754	1.14132	0.231652	FCHO1	FCH domain only 1 [Source:HGNC Symbol;Acc:HGNC:29002]
ENSOARG00000009130	0.451926	1.11774	0.238361	ITGAX	integrin, alpha X (complement component 3 receptor 4 subunit) [Source:HGNC Symbol;Acc:HGNC:6152]
ENSOARG00000014236	0.581671	1.11774	0.0275453	CCR2	chemokine (C-C motif) receptor 2 [Source:HGNC Symbol;Acc:HGNC:1603]
ENSOARG00000014463	0.813009	1.11641	0.300322	WWC1	WW and C2 domain containing 1 [Source:HGNC Symbol;Acc:HGNC:29435]
ENSOARG00000001659	0.686583	1.10065	0.232313	WDFY4	WDFY family member 4 [Source:HGNC Symbol;Acc:HGNC:29323]
ENSOARG00000012131	0.200091	1.07685	0.100852	IKZF3	IKAROS family zinc finger 3 (Aiolos) [Source:HGNC Symbol;Acc:HGNC:13178]
ENSOARG00000002960	1.11556	1.055	0.266393	STON2	stonin 2 [Source:HGNC Symbol;Acc:HGNC:30652]
ENSOARG00000008705	0.546112	1.0486	0.277628	MICAL2	microtubule associated monooxygenase, calponin and LIM domain containing 2 [Source:HGNC Symbol;Acc:HGNC:24693]
ENSOARG00000018189	0.320597	1.04572	0.0960309	FAIM2	Fas apoptotic inhibitory molecule 2 [Source:HGNC Symbol;Acc:HGNC:17067]
ENSOARG00000013079	0.337504	1.02885	0.0912428	IL18RAP	interleukin 18 receptor accessory protein [Source:HGNC Symbol;Acc:HGNC:5989]
ENSOARG00000006614	0.782063	1.01436	0.0472476	TBX5	T-box 5 [Source:HGNC Symbol;Acc:HGNC:11604]
ENSOARG00000003798	1.0879	1.01397	0.171519	PLCE1	phospholipase C, epsilon 1 [Source:HGNC Symbol;Acc:HGNC:17175]
ENSOARG00000020667	1.14407	1.01154	0.200297	-	high affinity immunoglobulin gamma Fc receptor I precursor [Source:RefSeq peptide;Acc:NP_001132924]
ENSOARG00000025564	0.276305	1.00619	0.594405
ENSOARG00000002808	0.231155	0.973209	0.0477801	-	Protein Wnt [Source:UniProtKB/TrEMBL;Acc:W5NXT3]
Novel01920	0.882818	0.963809	0.209442
Novel02027	0.454789	0.94684	0.153274
ENSOARG00000006421	0.408918	0.944318	0.174018	RUNX3	runt-related transcription factor 3 [Source:HGNC Symbol;Acc:HGNC:10473]
ENSOARG00000015286	0.402853	0.944131	0.122248	SEMA3A	sema domain, immunoglobulin domain (Ig), short basic domain, secreted, (semaphorin) 3A [Source:HGNC Symbol;Acc:HGNC:10723]
ENSOARG00000018139	0.0690624	0.941693	0.300693	GCGR	glucagon receptor [Source:HGNC Symbol;Acc:HGNC:4192]
ENSOARG00000015655	0.310724	0.928754	0.141275	OCA2	oculocutaneous albinism II [Source:HGNC Symbol;Acc:HGNC:8101]
ENSOARG00000009250	0.224634	0.922151	0.129333	ITGAD	integrin, alpha D [Source:HGNC Symbol;Acc:HGNC:6146]
ENSOARG00000005450	0.0285733	0.910389	0.0417406	-	Uncharacterized protein [Source:UniProtKB/TrEMBL;Acc:W5P608]
ENSOARG00000019347	0.913778	0.897844	0.0967773	NGEF	neuronal guanine nucleotide exchange factor [Source:HGNC Symbol;Acc:HGNC:7807]
Novel01327	0.905023	0.881355	0.171298
Novel01059	0.0909418	0.85364	0.183021
ENSOARG00000000994	0.0259621	0.805913	0.365533	PLA2G5	phospholipase A2, group V [Source:HGNC Symbol;Acc:HGNC:9038]
ENSOARG00000002371	0.0901192	0.756193	0.0533896	-	Uncharacterized protein [Source:UniProtKB/TrEMBL;Acc:W5NWG8]
ENSOARG00000015895	0.652235	0.716733	0.0894962	PLXNC1	plexin C1 [Source:HGNC Symbol;Acc:HGNC:9106]
Novel00796	0.0331579	0.715924	0.199791
ENSOARG00000002157	0.219615	0.68873	0.06309	NCR1	natural cytotoxicity triggering receptor 1 [Source:HGNC Symbol;Acc:HGNC:6731]
ENSOARG00000005581	0.557238	0.618645	0.0631877	PPARGC1A	peroxisome proliferator-activated receptor gamma, coactivator 1 alpha [Source:HGNC Symbol;Acc:HGNC:9237]

## Sheet: subcluster5
Gene_ID	SAT	VAT	TAT	Gene_Symbol	Description
ENSOARG00000004314	1041.54	981.552	3205.27	G0S2	G0/G1 switch 2 [Source:HGNC Symbol;Acc:HGNC:30229]
ENSOARG00000023715	343.912	906.084	1393.58	7SK	7SK RNA [Source:RFAM;Acc:RF00100]
ENSOARG00000002226	180.752	279.492	429.376	-	Uncharacterized protein [Source:UniProtKB/TrEMBL;Acc:W5NW00]
ENSOARG00000018681	175.378	288.118	396.306	PRKCDBP	protein kinase C, delta binding protein [Source:HGNC Symbol;Acc:HGNC:9400]
ENSOARG00000018872	126.665	176.287	311.736	-	Uncharacterized protein [Source:UniProtKB/TrEMBL;Acc:W5QC24]
ENSOARG00000001059	89.1565	178.041	242.017	-	Uncharacterized protein [Source:UniProtKB/TrEMBL;Acc:W5NSF7]
ENSOARG00000017964	63.8835	65.6086	234.917	IRX3	iroquois homeobox 3 [Source:HGNC Symbol;Acc:HGNC:14360]
ENSOARG00000001016	101.302	136.056	223.752	EPN1	epsin 1 [Source:HGNC Symbol;Acc:HGNC:21604]
ENSOARG00000012608	89.3658	193.443	217.069	SNRNP70	small nuclear ribonucleoprotein 70kDa (U1) [Source:HGNC Symbol;Acc:HGNC:11150]
ENSOARG00000000865	91.5075	173.687	210.123	HCFC1R1	host cell factor C1 regulator 1 (XPO1 dependent) [Source:HGNC Symbol;Acc:HGNC:21198]
ENSOARG00000020262	80.6387	122.546	196.88	H2AFJ	H2A histone family, member J [Source:HGNC Symbol;Acc:HGNC:14456]
ENSOARG00000016862	81.3976	106.404	188.236	COX14	COX14 cytochrome c oxidase assembly factor [Source:HGNC Symbol;Acc:HGNC:28216]
ENSOARG00000013634	53.5555	69.9939	131.513	DDTL	D-dopachrome tautomerase-like [Source:HGNC Symbol;Acc:HGNC:33446]
ENSOARG00000022840	46.5559	143.573	131.102	RNase_MRP	RNase MRP [Source:RFAM;Acc:RF00030]
ENSOARG00000000780	53.0084	69.5343	130.331	SLC2A4RG	SLC2A4 regulator [Source:HGNC Symbol;Acc:HGNC:15930]
ENSOARG00000013656	57.7039	84.814	120.331	AKT1S1	AKT1 substrate 1 (proline-rich) [Source:HGNC Symbol;Acc:HGNC:28426]
ENSOARG00000001516	40.8078	49.9764	119.649	SERINC2	serine incorporator 2 [Source:HGNC Symbol;Acc:HGNC:23231]
ENSOARG00000012584	42.9385	75.212	119.325	COL18A1	collagen, type XVIII, alpha 1 [Source:HGNC Symbol;Acc:HGNC:2195]
ENSOARG00000000450	5.61513	3.11367	113.266	S100A8	S100 calcium binding protein A8 [Source:HGNC Symbol;Acc:HGNC:10498]
ENSOARG00000012375	53.7594	72.0485	111.191	MLXIPL	MLX interacting protein-like [Source:HGNC Symbol;Acc:HGNC:12744]
ENSOARG00000016764	12.2661	5.08062	97.2741	FRZB	frizzled-related protein [Source:HGNC Symbol;Acc:HGNC:3959]
ENSOARG00000000196	39.1568	64.49	95.3068	-	Uncharacterized protein [Source:UniProtKB/TrEMBL;Acc:W5NPU0]
ENSOARG00000011967	37.0844	92.2342	93.9163	DBP	D site-binding protein [Source:RefSeq peptide;Acc:NP_001132921]
ENSOARG00000003435	35.4069	57.3731	89.1027	VWA1	von Willebrand factor A domain containing 1 [Source:HGNC Symbol;Acc:HGNC:30910]
ENSOARG00000002260	23.8475	32.4863	82.8349	MDFI	MyoD family inhibitor [Source:HGNC Symbol;Acc:HGNC:6967]
ENSOARG00000000965	28.7711	41.3319	66.1294	ZNF511	zinc finger protein 511 [Source:HGNC Symbol;Acc:HGNC:28445]
ENSOARG00000006259	30.2868	52.6548	65.1403	GUK1	guanylate kinase 1 [Source:HGNC Symbol;Acc:HGNC:4693]
ENSOARG00000005766	25.6235	37.4263	63.9561	GPR146	G protein-coupled receptor 146 [Source:HGNC Symbol;Acc:HGNC:21718]
ENSOARG00000009333	28.2311	57.0249	58.4065	PLIN5	perilipin 5 [Source:HGNC Symbol;Acc:HGNC:33196]
Novel02490	16.1648	32.016	55.3794
ENSOARG00000019752	20.6178	36.5409	48.6413	-	Uncharacterized protein [Source:UniProtKB/TrEMBL;Acc:W5QER6]
ENSOARG00000014590	0.696586	3.98158	48.4584	CRYM	crystallin, mu [Source:HGNC Symbol;Acc:HGNC:2418]
ENSOARG00000007118	20.7896	35.1576	47.1479	TP53I13	tumor protein p53 inducible protein 13 [Source:HGNC Symbol;Acc:HGNC:25102]
ENSOARG00000020383	4.16545	3.17397	42.9591	BDH1	3-hydroxybutyrate dehydrogenase, type 1 [Source:HGNC Symbol;Acc:HGNC:1027]
ENSOARG00000007297	13.7475	23.2193	41.1614	ZBTB42	zinc finger and BTB domain containing 42 [Source:HGNC Symbol;Acc:HGNC:32550]
Novel02112	17.2476	41.5587	39.2183
Novel02083	16.4726	25.9894	38.3642
ENSOARG00000013325	16.0095	26.1552	38.1447	-	Uncharacterized protein [Source:UniProtKB/TrEMBL;Acc:W5PV02]
ENSOARG00000002740	10.9276	28.0364	37.3923	HSF4	heat shock transcription factor 4 [Source:HGNC Symbol;Acc:HGNC:5227]
ENSOARG00000008873	16.8368	34.1054	35.828	SH3GLB2	SH3-domain GRB2-like endophilin B2 [Source:HGNC Symbol;Acc:HGNC:10834]
ENSOARG00000019780	16.3778	21.9937	35.5631	HDAC10	histone deacetylase 10 [Source:HGNC Symbol;Acc:HGNC:18128]
ENSOARG00000000945	14.2389	22.05	35.4598	NSMF	NMDA receptor synaptonuclear signaling and neuronal migration factor [Source:HGNC Symbol;Acc:HGNC:29843]
ENSOARG00000017769	8.73102	8.91031	34.6143	CITED1	Cbp/p300-interacting transactivator, with Glu/Asp-rich carboxy-terminal domain, 1 [Source:HGNC Symbol;Acc:HGNC:1986]
ENSOARG00000000417	6.9889	4.34284	33.5685	S100A9	S100 calcium binding protein A9 [Source:HGNC Symbol;Acc:HGNC:10499]
ENSOARG00000016319	1.25265	38.7171	31.8632	HOXC9	homeobox C9 [Source:HGNC Symbol;Acc:HGNC:5130]
ENSOARG00000002519	13.2837	27.3131	31.6717	NDOR1	NADPH dependent diflavin oxidoreductase 1 [Source:HGNC Symbol;Acc:HGNC:29838]
ENSOARG00000024340	8.69458	29.558	28.1203	Metazoa_SRP	Metazoan signal recognition particle RNA [Source:RFAM;Acc:RF00017]
ENSOARG00000025928	11.3221	28.7446	27.9838
ENSOARG00000019799	12.4377	25.2319	27.7959	MAPK12	mitogen-activated protein kinase 12 [Source:HGNC Symbol;Acc:HGNC:6874]
ENSOARG00000014577	8.55856	13.8102	26.7592	IZUMO4	IZUMO family member 4 [Source:HGNC Symbol;Acc:HGNC:26950]
ENSOARG00000002849	11.6308	18.457	26.6269	-	Uncharacterized protein [Source:UniProtKB/TrEMBL;Acc:W5NXX8]
ENSOARG00000000971	12.7123	34.5241	26.0621	ANKRD12	ankyrin repeat domain 12 [Source:HGNC Symbol;Acc:HGNC:29135]
ENSOARG00000008637	12.0531	16.7437	26.0123	TPGS1	tubulin polyglutamylase complex subunit 1 [Source:HGNC Symbol;Acc:HGNC:25058]
ENSOARG00000013018	3.33392	3.6029	25.4935	S100G	S100 calcium binding protein G [Source:HGNC Symbol;Acc:HGNC:1436]
ENSOARG00000016282	9.02107	16.1718	25.3136	DGKQ	diacylglycerol kinase, theta 110kDa [Source:HGNC Symbol;Acc:HGNC:2856]
ENSOARG00000011019	7.70363	7.47591	23.5868	CLCF1	cardiotrophin-like cytokine factor 1 [Source:HGNC Symbol;Acc:HGNC:17412]
ENSOARG00000007886	8.72798	11.8568	22.2574	-	Uncharacterized protein [Source:UniProtKB/TrEMBL;Acc:W5PDE6]
ENSOARG00000000119	8.39928	24.1385	21.9276	LMOD1	leiomodin 1 (smooth muscle) [Source:HGNC Symbol;Acc:HGNC:6647]
ENSOARG00000026619	8.72831	12.73	21.0175
ENSOARG00000021254	0	0.956683	20.9161	HOTAIR_2	HOTAIR conserved region 2 [Source:RFAM;Acc:RF01905]
ENSOARG00000019090	10.6855	32.3522	20.1351	RIPK3	receptor-interacting serine-threonine kinase 3 [Source:HGNC Symbol;Acc:HGNC:10021]
ENSOARG00000019756	9.12015	14.2891	20.1297	TUBGCP6	tubulin, gamma complex associated protein 6 [Source:HGNC Symbol;Acc:HGNC:18127]
Novel00766	1.64864	0.637177	19.8009
ENSOARG00000009680	0.426678	19.5475	19.567	HOXA9	homeobox A9 [Source:HGNC Symbol;Acc:HGNC:5109]
Novel00114	3.30827	1.02294	19.4988
ENSOARG00000006117	6.71195	9.49736	19.3967	SLC41A3	solute carrier family 41, member 3 [Source:HGNC Symbol;Acc:HGNC:31046]
ENSOARG00000010653	4.59994	8.66417	18.9192	ELMOD1	ELMO/CED-12 domain containing 1 [Source:HGNC Symbol;Acc:HGNC:25334]
ENSOARG00000013741	7.25446	10.7487	18.5699	HAGHL	hydroxyacylglutathione hydrolase-like [Source:HGNC Symbol;Acc:HGNC:14177]
ENSOARG00000005188	6.1068	10.8801	18.1293	MAP1B	microtubule-associated protein 1B [Source:HGNC Symbol;Acc:HGNC:6836]
ENSOARG00000026826	7.59542	12.7952	17.5944
Novel00277	6.66768	10.8664	15.9766
ENSOARG00000022982	5.61468	18.0806	15.4987	snoU85	Small nucleolar RNA U85 [Source:RFAM;Acc:RF01296]
ENSOARG00000016766	2.71729	1.68863	15.3512	P2RX6	purinergic receptor P2X, ligand gated ion channel, 6 [Source:HGNC Symbol;Acc:HGNC:8538]
ENSOARG00000011624	4.22934	3.70961	15.2573	FAM78B	family with sequence similarity 78, member B [Source:HGNC Symbol;Acc:HGNC:13495]
ENSOARG00000017398	0.978949	3.60804	14.787	-	Uncharacterized protein [Source:UniProtKB/TrEMBL;Acc:W5Q7I2]
ENSOARG00000016134	6.83531	9.33929	14.7699	KCNK7	potassium channel, two pore domain subfamily K, member 7 [Source:HGNC Symbol;Acc:HGNC:6282]
ENSOARG00000013059	3.37013	10.9963	14.3239	KIFC2	kinesin family member C2 [Source:HGNC Symbol;Acc:HGNC:29530]
ENSOARG00000003530	4.48503	9.11366	13.8843	RHBDD3	rhomboid domain containing 3 [Source:HGNC Symbol;Acc:HGNC:1308]
ENSOARG00000011320	3.16034	9.91269	12.8477	RPL12	ribosomal protein L12 [Source:HGNC Symbol;Acc:HGNC:10302]
ENSOARG00000001401	5.85164	11.8112	12.8341	EXD3	exonuclease 3'-5' domain containing 3 [Source:HGNC Symbol;Acc:HGNC:26023]
ENSOARG00000011251	0.747798	0.397113	11.5131	TPBGL	trophoblast glycoprotein-like [Source:HGNC Symbol;Acc:HGNC:44159]
ENSOARG00000006378	1.27068	2.56484	11.3428	BMP5	bone morphogenetic protein 5 [Source:HGNC Symbol;Acc:HGNC:1072]
ENSOARG00000008521	2.71166	2.62161	11.2503	SHC2	SHC (Src homology 2 domain containing) transforming protein 2 [Source:HGNC Symbol;Acc:HGNC:29869]
ENSOARG00000021214	0	0.961258	11.2152	HOTAIR_3	HOTAIR conserved region 3 [Source:RFAM;Acc:RF01906]
ENSOARG00000016331	0.0318147	6.71183	10.9546	HOXC10	homeobox C10 [Source:HGNC Symbol;Acc:HGNC:5122]
ENSOARG00000006240	4.02239	8.77337	10.6796	XRCC3	X-ray repair complementing defective repair in Chinese hamster cells 3 [Source:HGNC Symbol;Acc:HGNC:12830]
ENSOARG00000013979	3.05896	6.78416	10.3519	TMEM249	transmembrane protein 249 [Source:HGNC Symbol;Acc:HGNC:44155]
Novel01039	4.28772	7.4065	9.74052
ENSOARG00000009675	0.0861703	4.45395	9.49764	HOXA10	homeobox A10 [Source:HGNC Symbol;Acc:HGNC:5100]
ENSOARG00000015581	3.97726	8.62228	8.74906	PARP10	poly (ADP-ribose) polymerase family, member 10 [Source:HGNC Symbol;Acc:HGNC:25895]
ENSOARG00000019331	3.4645	8.126	8.74446	SLC22A17	solute carrier family 22, member 17 [Source:HGNC Symbol;Acc:HGNC:23095]
ENSOARG00000008558	1.55175	1.60289	8.17292	BCO1	beta-carotene oxygenase 1 [Source:HGNC Symbol;Acc:HGNC:13815]
ENSOARG00000008661	3.2921	4.91764	8.11886	CCDC37	coiled-coil domain containing 37 [Source:HGNC Symbol;Acc:HGNC:26842]
ENSOARG00000006626	2.48429	3.57787	7.02495	IRF7	interferon regulatory factor 7 [Source:HGNC Symbol;Acc:HGNC:6122]
ENSOARG00000017085	2.83033	7.07447	6.92846	MED15	mediator complex subunit 15 [Source:HGNC Symbol;Acc:HGNC:14248]
ENSOARG00000006455	2.94435	6.7385	6.66459	CPNE9	copine family member IX [Source:HGNC Symbol;Acc:HGNC:24336]
Novel02254	0.414219	1.55191	6.6517
ENSOARG00000025450	2.26413	4.87924	6.57667
ENSOARG00000013193	1.22479	1.56082	6.32106	CPZ	carboxypeptidase Z [Source:HGNC Symbol;Acc:HGNC:2333]
ENSOARG00000013494	2.32393	5.4987	6.24525	HGFAC	HGF activator [Source:HGNC Symbol;Acc:HGNC:4894]
ENSOARG00000012499	1.79278	3.56769	5.70078	ZFPM1	zinc finger protein, FOG family member 1 [Source:HGNC Symbol;Acc:HGNC:19762]
ENSOARG00000013752	1.1066	1.81096	5.39007	NOG	noggin [Source:HGNC Symbol;Acc:HGNC:7866]
ENSOARG00000014765	1.54346	5.59163	5.38784	KIAA1875	KIAA1875 [Source:HGNC Symbol;Acc:HGNC:26959]
ENSOARG00000020763	1.53897	2.4212	5.34473	GUCY2C	guanylate cyclase 2C [Source:HGNC Symbol;Acc:HGNC:4688]
ENSOARG00000016425	1.31182	5.82212	5.29881	NPFF	neuropeptide FF-amide peptide precursor [Source:HGNC Symbol;Acc:HGNC:7901]
ENSOARG00000014344	2.32626	3.32724	5.1188	SPATA2L	spermatogenesis associated 2-like [Source:HGNC Symbol;Acc:HGNC:28393]
ENSOARG00000003620	1.18661	5.63115	5.08446	KCP	kielin/chordin-like protein [Source:HGNC Symbol;Acc:HGNC:17585]
ENSOARG00000018488	1.7074	3.85091	4.98735	C16orf59	chromosome 16 open reading frame 59 [Source:HGNC Symbol;Acc:HGNC:25849]
ENSOARG00000011329	1.98537	9.77085	4.96477	TMEM59L	transmembrane protein 59-like [Source:HGNC Symbol;Acc:HGNC:13237]
ENSOARG00000012948	2.23941	9.36505	4.91742	FHL2	four and a half LIM domains 2 [Source:HGNC Symbol;Acc:HGNC:3703]
ENSOARG00000004980	1.19191	3.35435	4.82196	MATN4	matrilin 4 [Source:HGNC Symbol;Acc:HGNC:6910]
ENSOARG00000006908	1.96858	8.16058	4.47443	HOXB7	homeobox B7 [Source:HGNC Symbol;Acc:HGNC:5118]
Novel02255	0.25778	1.38782	4.4517
Novel01686	0.0114723	0.48439	4.38038
ENSOARG00000010904	1.32769	4.00404	4.25668	CCDC64	coiled-coil domain containing 64 [Source:HGNC Symbol;Acc:HGNC:28095]
ENSOARG00000012971	1.56587	3.68261	4.23884	WDR90	WD repeat domain 90 [Source:HGNC Symbol;Acc:HGNC:26960]
ENSOARG00000002310	0.363466	1.26191	3.68113	FRMD1	FERM domain containing 1 [Source:HGNC Symbol;Acc:HGNC:21240]
ENSOARG00000003936	0.0138856	0.146678	3.60289	CALB2	calbindin 2 [Source:HGNC Symbol;Acc:HGNC:1435]
ENSOARG00000008454	1.28615	3.44567	3.18068	-	Uncharacterized protein [Source:UniProtKB/TrEMBL;Acc:W5PF54]
ENSOARG00000005434	0.0277149	0.0274779	3.04517	ZIC1	Zic family member 1 [Source:HGNC Symbol;Acc:HGNC:12872]
Novel02225	0.464016	1.23666	2.88414
ENSOARG00000000427	0	0	2.83614
ENSOARG00000008335	0.816166	2.1489	2.72293	COL11A2	collagen, type XI, alpha 2 [Source:HGNC Symbol;Acc:HGNC:2187]
ENSOARG00000013352	0.950139	1.47187	2.64181	SLC28A1	solute carrier family 28 (concentrative nucleoside transporter), member 1 [Source:HGNC Symbol;Acc:HGNC:11001]
ENSOARG00000026129	0.791984	1.72157	2.60925
ENSOARG00000000429	0.777819	3.80374	2.56609	MROH6	maestro heat-like repeat family member 6 [Source:HGNC Symbol;Acc:HGNC:27814]
ENSOARG00000004053	0.749922	2.10389	2.46842	PRAM1	PML-RARA regulated adaptor molecule 1 [Source:HGNC Symbol;Acc:HGNC:30091]
ENSOARG00000016352	0.0197672	0	2.42499	HOXC12	homeobox C12 [Source:HGNC Symbol;Acc:HGNC:5124]
ENSOARG00000001487	0	0.101335	2.24944	ISL2	ISL LIM homeobox 2 [Source:HGNC Symbol;Acc:HGNC:18524]
ENSOARG00000016342	0	0.254678	2.15453	HOXC11	homeobox C11 [Source:HGNC Symbol;Acc:HGNC:5123]
ENSOARG00000009639	0.472049	0.980327	2.09521	-	Uncharacterized protein [Source:UniProtKB/TrEMBL;Acc:W5PIS0]
Novel01182	0	0	2.08519
ENSOARG00000014900	0.498998	1.18896	2.07895	CCDC154	coiled-coil domain containing 154 [Source:HGNC Symbol;Acc:HGNC:34454]
ENSOARG00000025492	0.590345	1.25847	2.02093
ENSOARG00000000705	0.45485	2.31025	1.97871	-	Uncharacterized protein [Source:UniProtKB/TrEMBL;Acc:W5NRD6]
ENSOARG00000023214	0	0	1.89824	HOXA11-AS1_2	HOXA11 antisense RNA 1 conserved region 2 [Source:RFAM;Acc:RF02138]
Novel02256	0.259993	0.643733	1.86658
ENSOARG00000026498	0.293211	2.01256	1.45655
ENSOARG00000002535	0.39006	1.34318	1.3478	SLC34A3	solute carrier family 34 (type II sodium/phosphate cotransporter), member 3 [Source:HGNC Symbol;Acc:HGNC:20305]
Novel01918	0.0341035	0.996142	1.28259
Novel02257	0.205101	0.600876	1.00862
Novel02141	0.166926	0.511622	0.867177

## Sheet: subcluster6
Gene_ID	SAT	VAT	TAT	Gene_Symbol	Description
ENSOARG00000018343	985.071	356.059	202.512	-	Metallothionein-2 [Source:UniProtKB/Swiss-Prot;Acc:P68302]
ENSOARG00000006063	404.231	101.653	91.8473	EIF4EBP2	eukaryotic translation initiation factor 4E binding protein 2 [Source:HGNC Symbol;Acc:HGNC:3289]
ENSOARG00000018341	377.236	107.927	38.714	-	Metallothionein-1A [Source:UniProtKB/Swiss-Prot;Acc:P67982]
ENSOARG00000010969	217.656	86.4353	119.259	GPAM	glycerol-3-phosphate acyltransferase, mitochondrial [Source:HGNC Symbol;Acc:HGNC:24865]
ENSOARG00000012259	186.617	91.0795	61.8919	FMO3	flavin containing monooxygenase 3 [Source:HGNC Symbol;Acc:HGNC:3771]
ENSOARG00000013062	102.204	40.8111	38.2475	SETD7	SET domain containing (lysine methyltransferase) 7 [Source:HGNC Symbol;Acc:HGNC:30412]
ENSOARG00000011939	71.6984	33.636	9.33309	PROCR	protein C receptor, endothelial [Source:HGNC Symbol;Acc:HGNC:9452]
ENSOARG00000016918	63.8797	38.1948	10.4383	F2RL2	coagulation factor II (thrombin) receptor-like 2 [Source:HGNC Symbol;Acc:HGNC:3539]
ENSOARG00000018871	61.7481	33.5114	16.7412	CD47	CD47 molecule [Source:HGNC Symbol;Acc:HGNC:1682]
ENSOARG00000011916	56.3668	22.8825	27.9459	-	Uncharacterized protein [Source:UniProtKB/TrEMBL;Acc:W5PQP5]
ENSOARG00000012452	44.279	16.1773	25.7224	ADARB1	adenosine deaminase, RNA-specific, B1 [Source:HGNC Symbol;Acc:HGNC:226]
ENSOARG00000000573	41.6006	22.3049	12.2952	-	Uncharacterized protein [Source:UniProtKB/TrEMBL;Acc:W5NQZ2]
ENSOARG00000023536	41.4278	16.621	5.54675	HOTAIRM1_4	HOX antisense intergenic RNA myeloid 1 conserved region 4 [Source:RFAM;Acc:RF01978]
ENSOARG00000002722	41.1627	21.8639	3.97962	-	Uncharacterized protein [Source:UniProtKB/TrEMBL;Acc:W5NXJ3]
ENSOARG00000018445	39.8986	19.0709	6.5013	F13A1	coagulation factor XIII, A1 polypeptide [Source:HGNC Symbol;Acc:HGNC:3531]
ENSOARG00000010615	38.8562	17.493	10.7607	CPD	carboxypeptidase D [Source:HGNC Symbol;Acc:HGNC:2301]
ENSOARG00000009949	31.9677	21.7649	2.67015	SKAP2	src kinase associated phosphoprotein 2 [Source:HGNC Symbol;Acc:HGNC:15687]
ENSOARG00000009845	31.9428	9.33524	6.08207	OSMR	oncostatin M receptor [Source:HGNC Symbol;Acc:HGNC:8507]
ENSOARG00000013346	30.0879	9.85084	3.16135	CCL24	chemokine (C-C motif) ligand 24 [Source:HGNC Symbol;Acc:HGNC:10623]
ENSOARG00000010088	26.0251	10.0649	4.28995	VIT	vitrin [Source:HGNC Symbol;Acc:HGNC:12697]
ENSOARG00000001568	24.7376	14.1329	2.32345	-	Uncharacterized protein [Source:UniProtKB/TrEMBL;Acc:W5NU00]
ENSOARG00000007344	23.7847	12.2442	4.34252	ABCA1	ATP-binding cassette, sub-family A (ABC1), member 1 [Source:HGNC Symbol;Acc:HGNC:29]
ENSOARG00000005770	23.1919	8.74155	10.743	KIF1B	kinesin family member 1B [Source:HGNC Symbol;Acc:HGNC:16636]
ENSOARG00000004809	22.6891	3.00989	3.61275	-	Uncharacterized protein [Source:UniProtKB/TrEMBL;Acc:W5P401]
ENSOARG00000012075	22.5971	7.74222	5.96632	CDON	cell adhesion associated, oncogene regulated [Source:HGNC Symbol;Acc:HGNC:17104]
ENSOARG00000020442	21.9898	9.71335	9.47304	NOTCH2	notch 2 [Source:HGNC Symbol;Acc:HGNC:7882]
Novel01436	16.792	6.99102	5.83063
ENSOARG00000015715	15.0854	1.05193	4.57006	KERA	keratocan [Source:HGNC Symbol;Acc:HGNC:6309]
ENSOARG00000012378	15.0082	5.80588	5.02665	SLC4A4	solute carrier family 4 (sodium bicarbonate cotransporter), member 4 [Source:HGNC Symbol;Acc:HGNC:11030]
ENSOARG00000015346	14.8234	6.149	3.54096	UBXN2B	UBX domain protein 2B [Source:HGNC Symbol;Acc:HGNC:27035]
ENSOARG00000019884	14.5427	4.16151	6.01233	CNTN1	contactin 1 [Source:HGNC Symbol;Acc:HGNC:2171]
ENSOARG00000009090	13.2712	2.61224	3.9548	CYP1B1	cytochrome P450, family 1, subfamily B, polypeptide 1 [Source:HGNC Symbol;Acc:HGNC:2597]
ENSOARG00000008114	12.7456	5.2854	5.91993	GPR107	G protein-coupled receptor 107 [Source:HGNC Symbol;Acc:HGNC:17830]
ENSOARG00000005515	11.5092	4.11862	5.56887	PDPR	pyruvate dehydrogenase phosphatase regulatory subunit [Source:HGNC Symbol;Acc:HGNC:30264]
ENSOARG00000012805	10.9995	4.726	3.50697	TMEM2	transmembrane protein 2 [Source:HGNC Symbol;Acc:HGNC:11869]
ENSOARG00000002548	9.328	5.07225	2.30781	UST	uronyl-2-sulfotransferase [Source:HGNC Symbol;Acc:HGNC:17223]
ENSOARG00000020838	9.09428	3.8321	0.418384	GPRC5A	G protein-coupled receptor, class C, group 5, member A [Source:HGNC Symbol;Acc:HGNC:9836]
ENSOARG00000018960	9.07946	4.18373	2.67323	RALGAPB	Ral GTPase activating protein, beta subunit (non-catalytic) [Source:HGNC Symbol;Acc:HGNC:29221]
ENSOARG00000017994	8.33658	2.75189	2.84193	LNPEP	leucyl/cystinyl aminopeptidase [Source:HGNC Symbol;Acc:HGNC:6656]
ENSOARG00000007034	8.16113	2.49191	1.02774	HOXB5	homeobox B5 [Source:HGNC Symbol;Acc:HGNC:5116]
ENSOARG00000002613	7.7111	1.42918	2.06105	SHOX2	short stature homeobox 2 [Source:HGNC Symbol;Acc:HGNC:10854]
ENSOARG00000017739	7.42668	4.41945	0.110249	CAPN6	calpain 6 [Source:HGNC Symbol;Acc:HGNC:1483]
ENSOARG00000009871	6.36109	2.51221	2.75562	-	Uncharacterized protein [Source:UniProtKB/TrEMBL;Acc:W5PJG3]
ENSOARG00000014525	5.7138	1.70927	2.02252	AR	androgen receptor [Source:HGNC Symbol;Acc:HGNC:644]
ENSOARG00000003422	5.51825	2.92999	0.498015	SMPD3	sphingomyelin phosphodiesterase 3, neutral membrane (neutral sphingomyelinase II) [Source:HGNC Symbol;Acc:HGNC:14240]
ENSOARG00000000956	5.51757	2.6135	0.970959	-	Uncharacterized protein [Source:UniProtKB/TrEMBL;Acc:W5NS48]
ENSOARG00000006073	4.33543	0.0604005	0.15671	MAB21L1	mab-21-like 1 (C. elegans) [Source:HGNC Symbol;Acc:HGNC:6757]
ENSOARG00000020045	4.10534	1.62781	0.781091	-	Uncharacterized protein [Source:UniProtKB/TrEMBL;Acc:W5QFM3]
Novel00803	3.66051	1.25597	1.41532
ENSOARG00000013402	2.83216	0.168641	0.0629593	PTGFR	prostaglandin F receptor (FP) [Source:HGNC Symbol;Acc:HGNC:9600]
ENSOARG00000007533	2.56972	0.428013	0.466917	ADCYAP1R1	adenylate cyclase activating polypeptide 1 (pituitary) receptor type I [Source:HGNC Symbol;Acc:HGNC:242]
ENSOARG00000014195	2.2226	0.559017	0.0736851	TMEFF2	transmembrane protein with EGF-like and two follistatin-like domains 2 [Source:HGNC Symbol;Acc:HGNC:11867]
