# Supplementary material for: Comparative transcriptome analysis reveals potentially novel roles of Homeobox genes in adipose deposition in fat-tailed sheep
Source: Sci Rep. 2017 Nov 3;7:14491. doi: 10.1038/s41598-017-14967-9 (PMC5670210; doi:10.1038/s41598-017-14967-9)
Supplement: Supplementary file 9 — Dataset 8 [file 41598_2017_14967_MOESM9_ESM.xlsx]

## Sheet: Supplementary Table S8
Supplementary Table S8. The percentage of the DEGs from six subclusters in 237 KEGG pathways.
Terms	All subs(1058)	sub1(189)	sub2(183)	sub3(144)	sub4(348)	sub5(142)	sub6(52)
Metabolic pathways	57(0.05%)	28(0.15%)	3(0.02%)	7(0.05%)	10(0.03%)	7(0.05%)	2(0.04%)
Cytokine-cytokine receptor interaction	41(0.04%)	1(0.15%)	10(0.05%)	9(0.06%)	19(0.05%)	1(0.01%)	1(0.02%)
PI3K-Akt signaling pathway	37(0.03%)	4(0.15%)	8(0.04%)	4(0.03%)	18(0.05%)	1(0.01%)	2(0.04%)
HTLV-I infection	35(0.03%)	4(0.15%)	14(0.08%)	5(0.03%)	12(0.03%)	0(0.00%)	0(0.00%)
Pathways in cancer	32(0.03%)	8(0.15%)	4(0.02%)	5(0.03%)	13(0.04%)	0(0.00%)	2(0.04%)
Chemokine signaling pathway	30(0.03%)	5(0.15%)	9(0.05%)	3(0.02%)	11(0.03%)	1(0.01%)	1(0.02%)
Tuberculosis	30(0.03%)	1(0.15%)	3(0.02%)	10(0.07%)	14(0.04%)	1(0.01%)	1(0.02%)
Rap1 signaling pathway	28(0.03%)	5(0.15%)	7(0.04%)	2(0.01%)	13(0.04%)	1(0.01%)	0(0.00%)
Phagosome	27(0.03%)	1(0.15%)	6(0.03%)	10(0.07%)	10(0.03%)	0(0.00%)	0(0.00%)
Cell adhesion molecules (CAMs)	26(0.02%)	2(0.15%)	9(0.05%)	3(0.02%)	11(0.03%)	0(0.00%)	1(0.02%)
Proteoglycans in cancer	25(0.02%)	4(0.15%)	1(0.01%)	2(0.01%)	16(0.05%)	2(0.01%)	0(0.00%)
Transcriptional misregulation in cancer	25(0.02%)	3(0.15%)	6(0.03%)	5(0.03%)	11(0.03%)	0(0.00%)	0(0.00%)
Ras signaling pathway	24(0.02%)	2(0.15%)	7(0.04%)	2(0.01%)	12(0.03%)	1(0.01%)	0(0.00%)
Antigen processing and presentation	23(0.02%)	0(0.15%)	10(0.05%)	3(0.02%)	10(0.03%)	0(0.00%)	0(0.00%)
Natural killer cell mediated cytotoxicity	23(0.02%)	0(0.15%)	9(0.05%)	3(0.02%)	10(0.03%)	1(0.01%)	0(0.00%)
Endocytosis	23(0.02%)	0(0.15%)	8(0.04%)	4(0.03%)	9(0.03%)	2(0.01%)	0(0.00%)
Hematopoietic cell lineage	23(0.02%)	0(0.15%)	7(0.04%)	5(0.03%)	11(0.03%)	0(0.00%)	0(0.00%)
Staphylococcus aureus infection	23(0.02%)	0(0.15%)	2(0.01%)	13(0.09%)	6(0.02%)	0(0.00%)	2(0.04%)
cAMP signaling pathway	22(0.02%)	7(0.15%)	3(0.02%)	1(0.01%)	10(0.03%)	0(0.00%)	1(0.02%)
Herpes simplex infection	22(0.02%)	0(0.15%)	7(0.04%)	3(0.02%)	11(0.03%)	1(0.01%)	0(0.00%)
Focal adhesion	21(0.02%)	3(0.15%)	3(0.02%)	0(0.00%)	12(0.03%)	2(0.01%)	1(0.02%)
Complement and coagulation cascades	21(0.02%)	1(0.15%)	2(0.01%)	9(0.06%)	6(0.02%)	0(0.00%)	3(0.06%)
T cell receptor signaling pathway	21(0.02%)	1(0.15%)	10(0.05%)	1(0.01%)	8(0.02%)	1(0.01%)	0(0.00%)
Influenza A	21(0.02%)	1(0.15%)	5(0.03%)	4(0.03%)	9(0.03%)	2(0.01%)	0(0.00%)
Regulation of actin cytoskeleton	20(0.02%)	1(0.15%)	2(0.01%)	2(0.01%)	15(0.04%)	0(0.00%)	0(0.00%)
Calcium signaling pathway	19(0.02%)	2(0.15%)	1(0.01%)	4(0.03%)	10(0.03%)	1(0.01%)	1(0.02%)
Measles	19(0.02%)	1(0.15%)	7(0.04%)	3(0.02%)	7(0.02%)	1(0.01%)	0(0.00%)
Jak-STAT signaling pathway	19(0.02%)	1(0.15%)	5(0.03%)	5(0.03%)	6(0.02%)	1(0.01%)	1(0.02%)
cGMP-PKG signaling pathway	18(0.02%)	4(0.15%)	2(0.01%)	5(0.03%)	7(0.02%)	0(0.00%)	0(0.00%)
MAPK signaling pathway	18(0.02%)	3(0.15%)	7(0.04%)	3(0.02%)	4(0.01%)	1(0.01%)	0(0.00%)
Epstein-Barr virus infection	18(0.02%)	2(0.15%)	7(0.04%)	3(0.02%)	4(0.01%)	1(0.01%)	1(0.02%)
Viral carcinogenesis	18(0.02%)	1(0.15%)	7(0.04%)	3(0.02%)	5(0.01%)	2(0.01%)	0(0.00%)
Neuroactive ligand-receptor interaction	18(0.02%)	0(0.15%)	2(0.01%)	5(0.03%)	7(0.02%)	1(0.01%)	3(0.06%)
Platelet activation	17(0.02%)	5(0.15%)	0(0.00%)	2(0.01%)	8(0.02%)	2(0.01%)	0(0.00%)
Viral myocarditis	17(0.02%)	1(0.15%)	7(0.04%)	3(0.02%)	6(0.02%)	0(0.00%)	0(0.00%)
Chagas disease (American trypanosomiasis)	17(0.02%)	1(0.15%)	4(0.02%)	4(0.03%)	7(0.02%)	1(0.01%)	0(0.00%)
Osteoclast differentiation	17(0.02%)	1(0.15%)	2(0.01%)	8(0.06%)	4(0.01%)	2(0.01%)	0(0.00%)
Systemic lupus erythematosus	17(0.02%)	0(0.15%)	1(0.01%)	9(0.06%)	4(0.01%)	1(0.01%)	2(0.04%)
Inflammatory bowel disease (IBD)	16(0.02%)	1(0.15%)	4(0.02%)	3(0.02%)	8(0.02%)	0(0.00%)	0(0.00%)
Fc gamma R-mediated phagocytosis	16(0.02%)	1(0.15%)	3(0.02%)	3(0.02%)	9(0.03%)	0(0.00%)	0(0.00%)
Toxoplasmosis	16(0.02%)	1(0.15%)	2(0.01%)	2(0.01%)	9(0.03%)	1(0.01%)	1(0.02%)
Hepatitis B	16(0.02%)	1(0.15%)	2(0.01%)	2(0.01%)	9(0.03%)	1(0.01%)	1(0.02%)
Rheumatoid arthritis	16(0.02%)	0(0.15%)	3(0.02%)	5(0.03%)	8(0.02%)	0(0.00%)	0(0.00%)
Leishmaniasis	16(0.02%)	0(0.15%)	2(0.01%)	3(0.02%)	10(0.03%)	1(0.01%)	0(0.00%)
Pertussis	15(0.01%)	0(0.15%)	1(0.01%)	6(0.04%)	5(0.01%)	1(0.01%)	2(0.04%)
TNF signaling pathway	14(0.01%)	2(0.15%)	3(0.02%)	2(0.01%)	5(0.01%)	2(0.01%)	0(0.00%)
Toll-like receptor signaling pathway	14(0.01%)	1(0.15%)	2(0.01%)	2(0.01%)	7(0.02%)	2(0.01%)	0(0.00%)
Leukocyte transendothelial migration	14(0.01%)	1(0.15%)	4(0.02%)	2(0.01%)	6(0.02%)	1(0.01%)	0(0.00%)
Axon guidance	14(0.01%)	1(0.15%)	8(0.04%)	1(0.01%)	4(0.01%)	0(0.00%)	0(0.00%)
Type I diabetes mellitus	14(0.01%)	0(0.15%)	6(0.03%)	4(0.03%)	4(0.01%)	0(0.00%)	0(0.00%)
Inflammatory mediator regulation of TRP channels	13(0.01%)	3(0.15%)	2(0.01%)	2(0.01%)	5(0.01%)	1(0.01%)	0(0.00%)
MicroRNAs in cancer	13(0.01%)	1(0.15%)	0(0.00%)	3(0.02%)	6(0.02%)	0(0.00%)	3(0.06%)
Graft-versus-host disease	13(0.01%)	0(0.15%)	6(0.03%)	3(0.02%)	4(0.01%)	0(0.00%)	0(0.00%)
Allograft rejection	13(0.01%)	0(0.15%)	6(0.03%)	3(0.02%)	4(0.01%)	0(0.00%)	0(0.00%)
Autoimmune thyroid disease	13(0.01%)	0(0.15%)	6(0.03%)	3(0.02%)	4(0.01%)	0(0.00%)	0(0.00%)
Adrenergic signaling in cardiomyocytes	12(0.01%)	5(0.15%)	1(0.01%)	1(0.01%)	3(0.01%)	1(0.01%)	1(0.02%)
Estrogen signaling pathway	12(0.01%)	4(0.15%)	2(0.01%)	1(0.01%)	4(0.01%)	1(0.01%)	0(0.00%)
Oxytocin signaling pathway	12(0.01%)	4(0.15%)	2(0.01%)	1(0.01%)	5(0.01%)	0(0.00%)	0(0.00%)
Purine metabolism	12(0.01%)	4(0.15%)	0(0.00%)	1(0.01%)	5(0.01%)	2(0.01%)	0(0.00%)
NF-kappa B signaling pathway	12(0.01%)	0(0.15%)	4(0.02%)	3(0.02%)	4(0.01%)	0(0.00%)	1(0.02%)
Cholinergic synapse	11(0.01%)	4(0.15%)	0(0.00%)	1(0.01%)	5(0.01%)	0(0.00%)	1(0.02%)
AMPK signaling pathway	11(0.01%)	4(0.15%)	0(0.00%)	1(0.01%)	5(0.01%)	1(0.01%)	0(0.00%)
Melanogenesis	11(0.01%)	3(0.15%)	0(0.00%)	2(0.01%)	6(0.02%)	0(0.00%)	0(0.00%)
Neurotrophin signaling pathway	11(0.01%)	2(0.15%)	2(0.01%)	0(0.00%)	4(0.01%)	2(0.01%)	1(0.02%)
B cell receptor signaling pathway	11(0.01%)	1(0.15%)	3(0.02%)	2(0.01%)	5(0.01%)	0(0.00%)	0(0.00%)
Intestinal immune network for IgA production	11(0.01%)	0(0.15%)	2(0.01%)	3(0.02%)	6(0.02%)	0(0.00%)	0(0.00%)
Hippo signaling pathway	11(0.01%)	0(0.15%)	0(0.00%)	2(0.01%)	6(0.02%)	3(0.02%)	0(0.00%)
Dilated cardiomyopathy	10(0.01%)	5(0.15%)	1(0.01%)	0(0.00%)	4(0.01%)	0(0.00%)	0(0.00%)
Gap junction	10(0.01%)	4(0.15%)	0(0.00%)	1(0.01%)	5(0.01%)	0(0.00%)	0(0.00%)
Non-alcoholic fatty liver disease (NAFLD)	10(0.01%)	4(0.15%)	2(0.01%)	0(0.00%)	3(0.01%)	1(0.01%)	0(0.00%)
ErbB signaling pathway	10(0.01%)	3(0.15%)	1(0.01%)	1(0.01%)	4(0.01%)	1(0.01%)	0(0.00%)
Fc epsilon RI signaling pathway	10(0.01%)	1(0.15%)	2(0.01%)	2(0.01%)	4(0.01%)	1(0.01%)	0(0.00%)
Amoebiasis	10(0.01%)	1(0.15%)	0(0.00%)	2(0.01%)	6(0.02%)	1(0.01%)	0(0.00%)
Primary immunodeficiency	10(0.01%)	0(0.15%)	7(0.04%)	0(0.00%)	3(0.01%)	0(0.00%)	0(0.00%)
Alcoholism	9(0.01%)	4(0.15%)	0(0.00%)	1(0.01%)	1(0.00%)	3(0.02%)	0(0.00%)
Insulin secretion	9(0.01%)	3(0.15%)	0(0.00%)	1(0.01%)	4(0.01%)	0(0.00%)	1(0.02%)
Vascular smooth muscle contraction	9(0.01%)	3(0.15%)	0(0.00%)	2(0.01%)	4(0.01%)	0(0.00%)	0(0.00%)
Prostate cancer	9(0.01%)	2(0.15%)	0(0.00%)	2(0.01%)	3(0.01%)	0(0.00%)	2(0.04%)
Glycerophospholipid metabolism	9(0.01%)	2(0.15%)	0(0.00%)	1(0.01%)	4(0.01%)	1(0.01%)	1(0.02%)
HIF-1 signaling pathway	9(0.01%)	2(0.15%)	0(0.00%)	1(0.01%)	5(0.01%)	0(0.00%)	1(0.02%)
Malaria	9(0.01%)	1(0.15%)	1(0.01%)	2(0.01%)	5(0.01%)	0(0.00%)	0(0.00%)
VEGF signaling pathway	9(0.01%)	1(0.15%)	2(0.01%)	1(0.01%)	3(0.01%)	2(0.01%)	0(0.00%)
Protein digestion and absorption	9(0.01%)	1(0.15%)	0(0.00%)	4(0.03%)	2(0.01%)	2(0.01%)	0(0.00%)
FoxO signaling pathway	9(0.01%)	1(0.15%)	2(0.01%)	0(0.00%)	4(0.01%)	1(0.01%)	1(0.02%)
Signaling pathways regulating pluripotency of stem cells	9(0.01%)	1(0.15%)	2(0.01%)	2(0.01%)	3(0.01%)	1(0.01%)	0(0.00%)
Bacterial invasion of epithelial cells	9(0.01%)	0(0.15%)	2(0.01%)	1(0.01%)	5(0.01%)	1(0.01%)	0(0.00%)
Legionellosis	9(0.01%)	0(0.15%)	1(0.01%)	2(0.01%)	6(0.02%)	0(0.00%)	0(0.00%)
Acute myeloid leukemia	8(0.01%)	3(0.15%)	1(0.01%)	2(0.01%)	2(0.01%)	0(0.00%)	0(0.00%)
Glycerolipid metabolism	8(0.01%)	3(0.15%)	0(0.00%)	1(0.01%)	2(0.01%)	1(0.01%)	1(0.02%)
Salivary secretion	8(0.01%)	3(0.15%)	0(0.00%)	2(0.01%)	3(0.01%)	0(0.00%)	0(0.00%)
Circadian entrainment	8(0.01%)	3(0.15%)	0(0.00%)	0(0.00%)	4(0.01%)	0(0.00%)	1(0.02%)
Pancreatic secretion	8(0.01%)	3(0.15%)	0(0.00%)	0(0.00%)	4(0.01%)	0(0.00%)	1(0.02%)
Hepatitis C	8(0.01%)	3(0.15%)	0(0.00%)	0(0.00%)	3(0.01%)	2(0.01%)	0(0.00%)
Insulin signaling pathway	8(0.01%)	3(0.15%)	0(0.00%)	1(0.01%)	3(0.01%)	1(0.01%)	0(0.00%)
Thyroid hormone signaling pathway	8(0.01%)	2(0.15%)	1(0.01%)	1(0.01%)	3(0.01%)	0(0.00%)	1(0.02%)
Arachidonic acid metabolism	8(0.01%)	1(0.15%)	1(0.01%)	2(0.01%)	4(0.01%)	0(0.00%)	0(0.00%)
Apoptosis	8(0.01%)	1(0.15%)	1(0.01%)	1(0.01%)	4(0.01%)	0(0.00%)	1(0.02%)
ECM-receptor interaction	8(0.01%)	1(0.15%)	0(0.00%)	0(0.00%)	5(0.01%)	1(0.01%)	1(0.02%)
Wnt signaling pathway	8(0.01%)	0(0.15%)	4(0.02%)	1(0.01%)	3(0.01%)	0(0.00%)	0(0.00%)
Salmonella infection	8(0.01%)	0(0.15%)	2(0.01%)	2(0.01%)	3(0.01%)	1(0.01%)	0(0.00%)
Glycine, serine and threonine metabolism	7(0.01%)	6(0.15%)	0(0.00%)	1(0.01%)	0(0.00%)	0(0.00%)	0(0.00%)
Bile secretion	7(0.01%)	5(0.15%)	0(0.00%)	0(0.00%)	1(0.00%)	0(0.00%)	1(0.02%)
Progesterone-mediated oocyte maturation	7(0.01%)	4(0.15%)	0(0.00%)	0(0.00%)	2(0.01%)	1(0.01%)	0(0.00%)
Ovarian steroidogenesis	7(0.01%)	3(0.15%)	0(0.00%)	2(0.01%)	1(0.00%)	0(0.00%)	1(0.02%)
Thyroid hormone synthesis	7(0.01%)	3(0.15%)	0(0.00%)	1(0.01%)	3(0.01%)	0(0.00%)	0(0.00%)
Adipocytokine signaling pathway	7(0.01%)	3(0.15%)	0(0.00%)	0(0.00%)	4(0.01%)	0(0.00%)	0(0.00%)
GnRH signaling pathway	7(0.01%)	3(0.15%)	1(0.01%)	1(0.01%)	1(0.00%)	1(0.01%)	0(0.00%)
Morphine addiction	7(0.01%)	3(0.15%)	0(0.00%)	0(0.00%)	4(0.01%)	0(0.00%)	0(0.00%)
Nucleotide excision repair	7(0.01%)	2(0.15%)	0(0.00%)	1(0.01%)	3(0.01%)	1(0.01%)	0(0.00%)
Dopaminergic synapse	7(0.01%)	2(0.15%)	0(0.00%)	1(0.01%)	3(0.01%)	1(0.01%)	0(0.00%)
Chronic myeloid leukemia	7(0.01%)	1(0.15%)	0(0.00%)	3(0.02%)	2(0.01%)	1(0.01%)	0(0.00%)
Protein processing in endoplasmic reticulum	7(0.01%)	0(0.15%)	3(0.02%)	2(0.01%)	1(0.00%)	0(0.00%)	1(0.02%)
Asthma	7(0.01%)	0(0.15%)	1(0.01%)	2(0.01%)	4(0.01%)	0(0.00%)	0(0.00%)
NOD-like receptor signaling pathway	7(0.01%)	0(0.15%)	1(0.01%)	2(0.01%)	3(0.01%)	1(0.01%)	0(0.00%)
Carbon metabolism	6(0.01%)	5(0.15%)	0(0.00%)	1(0.01%)	0(0.00%)	0(0.00%)	0(0.00%)
Non-small cell lung cancer	6(0.01%)	3(0.15%)	0(0.00%)	1(0.01%)	2(0.01%)	0(0.00%)	0(0.00%)
GABAergic synapse	6(0.01%)	3(0.15%)	1(0.01%)	0(0.00%)	2(0.01%)	0(0.00%)	0(0.00%)
Retrograde endocannabinoid signaling	6(0.01%)	3(0.15%)	0(0.00%)	0(0.00%)	2(0.01%)	1(0.01%)	0(0.00%)
Glutamatergic synapse	6(0.01%)	3(0.15%)	0(0.00%)	1(0.01%)	2(0.01%)	0(0.00%)	0(0.00%)
Tight junction	6(0.01%)	3(0.15%)	0(0.00%)	1(0.01%)	2(0.01%)	0(0.00%)	0(0.00%)
Basal cell carcinoma	6(0.01%)	2(0.15%)	0(0.00%)	1(0.01%)	3(0.01%)	0(0.00%)	0(0.00%)
Arrhythmogenic right ventricular cardiomyopathy (ARVC)	6(0.01%)	2(0.15%)	0(0.00%)	0(0.00%)	4(0.01%)	0(0.00%)	0(0.00%)
Chemical carcinogenesis	6(0.01%)	2(0.15%)	1(0.01%)	0(0.00%)	2(0.01%)	0(0.00%)	1(0.02%)
Glioma	6(0.01%)	1(0.15%)	0(0.00%)	1(0.01%)	3(0.01%)	1(0.01%)	0(0.00%)
Amphetamine addiction	6(0.01%)	1(0.15%)	1(0.01%)	1(0.01%)	3(0.01%)	0(0.00%)	0(0.00%)
Colorectal cancer	6(0.01%)	1(0.15%)	2(0.01%)	0(0.00%)	2(0.01%)	0(0.00%)	1(0.02%)
Ubiquitin mediated proteolysis	6(0.01%)	1(0.15%)	0(0.00%)	2(0.01%)	3(0.01%)	0(0.00%)	0(0.00%)
Huntington's disease	6(0.01%)	1(0.15%)	1(0.01%)	1(0.01%)	3(0.01%)	0(0.00%)	0(0.00%)
Cytosolic DNA-sensing pathway	6(0.01%)	0(0.15%)	1(0.01%)	1(0.01%)	2(0.01%)	2(0.01%)	0(0.00%)
Lysosome	6(0.01%)	0(0.15%)	1(0.01%)	2(0.01%)	3(0.01%)	0(0.00%)	0(0.00%)
Biosynthesis of amino acids	5(0.00%)	4(0.15%)	0(0.00%)	1(0.01%)	0(0.00%)	0(0.00%)	0(0.00%)
Parkinson's disease	5(0.00%)	4(0.15%)	0(0.00%)	0(0.00%)	1(0.00%)	0(0.00%)	0(0.00%)
PPAR signaling pathway	5(0.00%)	3(0.15%)	0(0.00%)	0(0.00%)	2(0.01%)	0(0.00%)	0(0.00%)
Gastric acid secretion	5(0.00%)	3(0.15%)	0(0.00%)	0(0.00%)	2(0.01%)	0(0.00%)	0(0.00%)
Oocyte meiosis	5(0.00%)	3(0.15%)	0(0.00%)	0(0.00%)	1(0.00%)	0(0.00%)	1(0.02%)
Cocaine addiction	5(0.00%)	2(0.15%)	1(0.01%)	1(0.01%)	1(0.00%)	0(0.00%)	0(0.00%)
Hedgehog signaling pathway	5(0.00%)	2(0.15%)	0(0.00%)	1(0.01%)	2(0.01%)	0(0.00%)	0(0.00%)
Metabolism of xenobiotics by cytochrome P450	5(0.00%)	2(0.15%)	1(0.01%)	0(0.00%)	1(0.00%)	0(0.00%)	1(0.02%)
Pancreatic cancer	5(0.00%)	2(0.15%)	1(0.01%)	1(0.01%)	1(0.00%)	0(0.00%)	0(0.00%)
Melanoma	5(0.00%)	2(0.15%)	0(0.00%)	1(0.01%)	2(0.01%)	0(0.00%)	0(0.00%)
Hypertrophic cardiomyopathy (HCM)	5(0.00%)	2(0.15%)	0(0.00%)	0(0.00%)	3(0.01%)	0(0.00%)	0(0.00%)
Small cell lung cancer	5(0.00%)	2(0.15%)	0(0.00%)	1(0.01%)	1(0.00%)	0(0.00%)	1(0.02%)
African trypanosomiasis	5(0.00%)	1(0.15%)	0(0.00%)	1(0.01%)	3(0.01%)	0(0.00%)	0(0.00%)
mTOR signaling pathway	5(0.00%)	1(0.15%)	0(0.00%)	0(0.00%)	3(0.01%)	1(0.01%)	0(0.00%)
Prolactin signaling pathway	5(0.00%)	1(0.15%)	0(0.00%)	0(0.00%)	2(0.01%)	2(0.01%)	0(0.00%)
Serotonergic synapse	5(0.00%)	1(0.15%)	0(0.00%)	1(0.01%)	3(0.01%)	0(0.00%)	0(0.00%)
Linoleic acid metabolism	5(0.00%)	0(0.15%)	1(0.01%)	1(0.01%)	3(0.01%)	0(0.00%)	0(0.00%)
TGF-beta signaling pathway	5(0.00%)	0(0.15%)	1(0.01%)	2(0.01%)	0(0.00%)	2(0.01%)	0(0.00%)
Phosphatidylinositol signaling system	5(0.00%)	0(0.15%)	0(0.00%)	0(0.00%)	4(0.01%)	1(0.01%)	0(0.00%)
Amino sugar and nucleotide sugar metabolism	4(0.00%)	3(0.15%)	0(0.00%)	1(0.01%)	0(0.00%)	0(0.00%)	0(0.00%)
Vasopressin-regulated water reabsorption	4(0.00%)	2(0.15%)	0(0.00%)	1(0.01%)	1(0.00%)	0(0.00%)	0(0.00%)
Retinol metabolism	4(0.00%)	1(0.15%)	0(0.00%)	1(0.01%)	1(0.00%)	1(0.01%)	0(0.00%)
Drug metabolism - cytochrome P450	4(0.00%)	0(0.15%)	2(0.01%)	0(0.00%)	1(0.00%)	0(0.00%)	1(0.02%)
Prion diseases	4(0.00%)	0(0.15%)	1(0.01%)	3(0.02%)	0(0.00%)	0(0.00%)	0(0.00%)
Steroid hormone biosynthesis	4(0.00%)	0(0.15%)	1(0.01%)	1(0.01%)	1(0.00%)	0(0.00%)	1(0.02%)
Alzheimer's disease	4(0.00%)	0(0.15%)	0(0.00%)	1(0.01%)	3(0.01%)	0(0.00%)	0(0.00%)
RIG-I-like receptor signaling pathway	4(0.00%)	0(0.15%)	0(0.00%)	0(0.00%)	2(0.01%)	2(0.01%)	0(0.00%)
Glyoxylate and dicarboxylate metabolism	3(0.00%)	3(0.15%)	0(0.00%)	0(0.00%)	0(0.00%)	0(0.00%)	0(0.00%)
Circadian rhythm	3(0.00%)	2(0.15%)	1(0.01%)	0(0.00%)	0(0.00%)	0(0.00%)	0(0.00%)
Cysteine and methionine metabolism	3(0.00%)	2(0.15%)	0(0.00%)	1(0.01%)	0(0.00%)	0(0.00%)	0(0.00%)
Carbohydrate digestion and absorption	3(0.00%)	2(0.15%)	0(0.00%)	0(0.00%)	1(0.00%)	0(0.00%)	0(0.00%)
Endocrine and other factor-regulated calcium reabsorption	3(0.00%)	2(0.15%)	0(0.00%)	0(0.00%)	1(0.00%)	0(0.00%)	0(0.00%)
Starch and sucrose metabolism	3(0.00%)	2(0.15%)	0(0.00%)	0(0.00%)	1(0.00%)	0(0.00%)	0(0.00%)
Endometrial cancer	3(0.00%)	2(0.15%)	0(0.00%)	0(0.00%)	1(0.00%)	0(0.00%)	0(0.00%)
Glycolysis / Gluconeogenesis	3(0.00%)	2(0.15%)	0(0.00%)	0(0.00%)	1(0.00%)	0(0.00%)	0(0.00%)
Nicotinate and nicotinamide metabolism	3(0.00%)	1(0.15%)	0(0.00%)	0(0.00%)	1(0.00%)	1(0.01%)	0(0.00%)
Notch signaling pathway	3(0.00%)	1(0.15%)	1(0.01%)	0(0.00%)	0(0.00%)	0(0.00%)	1(0.02%)
Renal cell carcinoma	3(0.00%)	1(0.15%)	1(0.01%)	0(0.00%)	1(0.00%)	0(0.00%)	0(0.00%)
Adherens junction	3(0.00%)	1(0.15%)	2(0.01%)	0(0.00%)	0(0.00%)	0(0.00%)	0(0.00%)
alpha-Linolenic acid metabolism	3(0.00%)	0(0.15%)	0(0.00%)	1(0.01%)	2(0.01%)	0(0.00%)	0(0.00%)
Ether lipid metabolism	3(0.00%)	0(0.15%)	0(0.00%)	1(0.01%)	2(0.01%)	0(0.00%)	0(0.00%)
Mineral absorption	3(0.00%)	0(0.15%)	0(0.00%)	1(0.01%)	0(0.00%)	1(0.01%)	1(0.02%)
Long-term depression	3(0.00%)	0(0.15%)	0(0.00%)	1(0.01%)	2(0.01%)	0(0.00%)	0(0.00%)
Fat digestion and absorption	3(0.00%)	0(0.15%)	0(0.00%)	0(0.00%)	2(0.01%)	0(0.00%)	1(0.02%)
Amyotrophic lateral sclerosis (ALS)	3(0.00%)	0(0.15%)	0(0.00%)	0(0.00%)	1(0.00%)	1(0.01%)	1(0.02%)
2-Oxocarboxylic acid metabolism	2(0.00%)	2(0.15%)	0(0.00%)	0(0.00%)	0(0.00%)	0(0.00%)	0(0.00%)
Terpenoid backbone biosynthesis	2(0.00%)	2(0.15%)	0(0.00%)	0(0.00%)	0(0.00%)	0(0.00%)	0(0.00%)
Steroid biosynthesis	2(0.00%)	2(0.15%)	0(0.00%)	0(0.00%)	0(0.00%)	0(0.00%)	0(0.00%)
Taste transduction	2(0.00%)	2(0.15%)	0(0.00%)	0(0.00%)	0(0.00%)	0(0.00%)	0(0.00%)
Valine, leucine and isoleucine degradation	2(0.00%)	2(0.15%)	0(0.00%)	0(0.00%)	0(0.00%)	0(0.00%)	0(0.00%)
Peroxisome	2(0.00%)	2(0.15%)	0(0.00%)	0(0.00%)	0(0.00%)	0(0.00%)	0(0.00%)
Butanoate metabolism	2(0.00%)	1(0.15%)	0(0.00%)	0(0.00%)	0(0.00%)	1(0.01%)	0(0.00%)
Alanine, aspartate and glutamate metabolism	2(0.00%)	1(0.15%)	0(0.00%)	1(0.01%)	0(0.00%)	0(0.00%)	0(0.00%)
Base excision repair	2(0.00%)	1(0.15%)	0(0.00%)	0(0.00%)	0(0.00%)	0(0.00%)	1(0.02%)
Bladder cancer	2(0.00%)	1(0.15%)	0(0.00%)	1(0.01%)	0(0.00%)	0(0.00%)	0(0.00%)
Pyruvate metabolism	2(0.00%)	1(0.15%)	0(0.00%)	0(0.00%)	0(0.00%)	1(0.01%)	0(0.00%)
Fatty acid metabolism	2(0.00%)	1(0.15%)	0(0.00%)	0(0.00%)	1(0.00%)	0(0.00%)	0(0.00%)
Arginine and proline metabolism	2(0.00%)	0(0.15%)	1(0.01%)	0(0.00%)	0(0.00%)	1(0.01%)	0(0.00%)
Spliceosome	2(0.00%)	0(0.15%)	1(0.01%)	0(0.00%)	0(0.00%)	1(0.01%)	0(0.00%)
Cell cycle	2(0.00%)	0(0.15%)	0(0.00%)	2(0.01%)	0(0.00%)	0(0.00%)	0(0.00%)
Glycosaminoglycan biosynthesis - chondroitin sulfate / dermatan sulfate	2(0.00%)	0(0.15%)	0(0.00%)	1(0.01%)	0(0.00%)	0(0.00%)	1(0.02%)
Pantothenate and CoA biosynthesis	2(0.00%)	0(0.15%)	0(0.00%)	1(0.01%)	1(0.00%)	0(0.00%)	0(0.00%)
Lysine degradation	2(0.00%)	0(0.15%)	0(0.00%)	1(0.01%)	0(0.00%)	0(0.00%)	1(0.02%)
Aldosterone-regulated sodium reabsorption	2(0.00%)	0(0.15%)	0(0.00%)	0(0.00%)	2(0.01%)	0(0.00%)	0(0.00%)
Inositol phosphate metabolism	2(0.00%)	0(0.15%)	0(0.00%)	0(0.00%)	2(0.01%)	0(0.00%)	0(0.00%)
RNA transport	2(0.00%)	0(0.15%)	0(0.00%)	0(0.00%)	2(0.01%)	0(0.00%)	0(0.00%)
Sphingolipid metabolism	2(0.00%)	0(0.15%)	0(0.00%)	0(0.00%)	1(0.00%)	0(0.00%)	1(0.02%)
Sulfur relay system	1(0.00%)	1(0.15%)	0(0.00%)	0(0.00%)	0(0.00%)	0(0.00%)	0(0.00%)
Fatty acid biosynthesis	1(0.00%)	1(0.15%)	0(0.00%)	0(0.00%)	0(0.00%)	0(0.00%)	0(0.00%)
Glycosphingolipid biosynthesis - globo series	1(0.00%)	1(0.15%)	0(0.00%)	0(0.00%)	0(0.00%)	0(0.00%)	0(0.00%)
Sulfur metabolism	1(0.00%)	1(0.15%)	0(0.00%)	0(0.00%)	0(0.00%)	0(0.00%)	0(0.00%)
One carbon pool by folate	1(0.00%)	1(0.15%)	0(0.00%)	0(0.00%)	0(0.00%)	0(0.00%)	0(0.00%)
Mismatch repair	1(0.00%)	1(0.15%)	0(0.00%)	0(0.00%)	0(0.00%)	0(0.00%)	0(0.00%)
Glycosaminoglycan degradation	1(0.00%)	1(0.15%)	0(0.00%)	0(0.00%)	0(0.00%)	0(0.00%)	0(0.00%)
Propanoate metabolism	1(0.00%)	1(0.15%)	0(0.00%)	0(0.00%)	0(0.00%)	0(0.00%)	0(0.00%)
Pentose phosphate pathway	1(0.00%)	1(0.15%)	0(0.00%)	0(0.00%)	0(0.00%)	0(0.00%)	0(0.00%)
Thyroid cancer	1(0.00%)	1(0.15%)	0(0.00%)	0(0.00%)	0(0.00%)	0(0.00%)	0(0.00%)
Citrate cycle (TCA cycle)	1(0.00%)	1(0.15%)	0(0.00%)	0(0.00%)	0(0.00%)	0(0.00%)	0(0.00%)
DNA replication	1(0.00%)	1(0.15%)	0(0.00%)	0(0.00%)	0(0.00%)	0(0.00%)	0(0.00%)
Drug metabolism - other enzymes	1(0.00%)	1(0.15%)	0(0.00%)	0(0.00%)	0(0.00%)	0(0.00%)	0(0.00%)
Glutathione metabolism	1(0.00%)	1(0.15%)	0(0.00%)	0(0.00%)	0(0.00%)	0(0.00%)	0(0.00%)
Cardiac muscle contraction	1(0.00%)	1(0.15%)	0(0.00%)	0(0.00%)	0(0.00%)	0(0.00%)	0(0.00%)
Oxidative phosphorylation	1(0.00%)	1(0.15%)	0(0.00%)	0(0.00%)	0(0.00%)	0(0.00%)	0(0.00%)
Folate biosynthesis	1(0.00%)	0(0.15%)	1(0.01%)	0(0.00%)	0(0.00%)	0(0.00%)	0(0.00%)
Maturity onset diabetes of the young	1(0.00%)	0(0.15%)	1(0.01%)	0(0.00%)	0(0.00%)	0(0.00%)	0(0.00%)
Fanconi anemia pathway	1(0.00%)	0(0.15%)	1(0.01%)	0(0.00%)	0(0.00%)	0(0.00%)	0(0.00%)
Ribosome biogenesis in eukaryotes	1(0.00%)	0(0.15%)	0(0.00%)	1(0.01%)	0(0.00%)	0(0.00%)	0(0.00%)
Olfactory transduction	1(0.00%)	0(0.15%)	0(0.00%)	1(0.01%)	0(0.00%)	0(0.00%)	0(0.00%)
Riboflavin metabolism	1(0.00%)	0(0.15%)	0(0.00%)	0(0.00%)	1(0.00%)	0(0.00%)	0(0.00%)
Phenylalanine metabolism	1(0.00%)	0(0.15%)	0(0.00%)	0(0.00%)	1(0.00%)	0(0.00%)	0(0.00%)
Glycosaminoglycan biosynthesis - heparan sulfate / heparin	1(0.00%)	0(0.15%)	0(0.00%)	0(0.00%)	1(0.00%)	0(0.00%)	0(0.00%)
Histidine metabolism	1(0.00%)	0(0.15%)	0(0.00%)	0(0.00%)	1(0.00%)	0(0.00%)	0(0.00%)
beta-Alanine metabolism	1(0.00%)	0(0.15%)	0(0.00%)	0(0.00%)	1(0.00%)	0(0.00%)	0(0.00%)
Tyrosine metabolism	1(0.00%)	0(0.15%)	0(0.00%)	0(0.00%)	1(0.00%)	0(0.00%)	0(0.00%)
Fatty acid degradation	1(0.00%)	0(0.15%)	0(0.00%)	0(0.00%)	1(0.00%)	0(0.00%)	0(0.00%)
Type II diabetes mellitus	1(0.00%)	0(0.15%)	0(0.00%)	0(0.00%)	1(0.00%)	0(0.00%)	0(0.00%)
Long-term potentiation	1(0.00%)	0(0.15%)	0(0.00%)	0(0.00%)	1(0.00%)	0(0.00%)	0(0.00%)
RNA degradation	1(0.00%)	0(0.15%)	0(0.00%)	0(0.00%)	1(0.00%)	0(0.00%)	0(0.00%)
p53 signaling pathway	1(0.00%)	0(0.15%)	0(0.00%)	0(0.00%)	1(0.00%)	0(0.00%)	0(0.00%)
Synthesis and degradation of ketone bodies	1(0.00%)	0(0.15%)	0(0.00%)	0(0.00%)	0(0.00%)	1(0.01%)	0(0.00%)
Ascorbate and aldarate metabolism	1(0.00%)	0(0.15%)	0(0.00%)	0(0.00%)	0(0.00%)	1(0.01%)	0(0.00%)
Ribosome	1(0.00%)	0(0.15%)	0(0.00%)	0(0.00%)	0(0.00%)	1(0.01%)	0(0.00%)
Renin-angiotensin system	1(0.00%)	0(0.15%)	0(0.00%)	0(0.00%)	0(0.00%)	0(0.00%)	1(0.02%)
Proximal tubule bicarbonate reclamation	1(0.00%)	0(0.15%)	0(0.00%)	0(0.00%)	0(0.00%)	0(0.00%)	1(0.02%)
Dorso-ventral axis formation	1(0.00%)	0(0.15%)	0(0.00%)	0(0.00%)	0(0.00%)	0(0.00%)	1(0.02%)
Tryptophan metabolism	1(0.00%)	0(0.15%)	0(0.00%)	0(0.00%)	0(0.00%)	0(0.00%)	1(0.02%)
ABC transporters	1(0.00%)	0(0.15%)	0(0.00%)	0(0.00%)	0(0.00%)	0(0.00%)	1(0.02%)
