# Supplementary material for: Comparative transcriptome analysis reveals potentially novel roles of Homeobox genes in adipose deposition in fat-tailed sheep
Source: Sci Rep. 2017 Nov 3;7:14491. doi: 10.1038/s41598-017-14967-9 (PMC5670210; doi:10.1038/s41598-017-14967-9)
Supplement: Supplementary file 10 — Dataset 9 [file 41598_2017_14967_MOESM10_ESM.xlsx]

## Sheet: Supplementary Table S9
Supplementary Table S9. Differentially expressed genes that were involved in the signaling molecules and interaction pathways.
Pathway	Gene Symbol	Gene Name	FPKM			log2FoldChange			FDR
			SAT	VAT	TAT	SAT/VAT	SAT/TAT	VAT/TAT	SAT/VAT	SAT/TAT	VAT/TAT
Cytokine-cytokine receptor interaction
	CX3CL1	Chemokine (C-X3-C motif) ligand 1	5.949	22.922	7.342	-1.843	-	1.334	0	-	0.025
	KDR	Kinase insert domain receptor	27.956	38.973	12.927	-	-	1.317	-	-	0.015
	TNFSF14	Tumor necrosis factor (ligand) superfamily, member 14	1.985	3.952	0.693	-	-	2.175	-	-	0.025
	CCL5	Chemokine (C-C motif) ligand 5	5.129	26.696	6.546	-2.274	-	-	0.002	-	-
	TNFSF15	Tumor necrosis factor (ligand) superfamily, member 15	2.008	0.943	0.199	-	3.082	-	-	0.009	-
	NGFR	Nerve growth factor receptor	0.793	1.837	0.277	-	-	2.498	-	-	0.006
	OSM	Oncostatin M	0.737	3.418	0.132	-	-	4.279	-	-	0.008
	CSF1R	Colony stimulating factor 1 receptor	19.684	27.569	6.13	-	-	1.919	-	-	0
	PDGFRB	Platelet-derived growth factor receptor, beta polypeptide	27.615	44.707	16.218	-	-	1.212	-	-	0.044
	VEGFC	Vascular endothelial growth factor C	6.248	14.488	3.514	-	-	1.711	-	-	0.003
	IL10RA	Interleukin 10 receptor, alpha	3	3.939	0.681	-	1.905	2.256	-	0.019	0
	CD27	CD27 molecule	0.941	3.498	0.471	-1.88	-	2.596	0.05	-	0.002
	CCL2	Chemokine (C-C motif) ligand 2	71.991	64.995	10.488	-	2.61	-	-	0	-
	OSMR	Oncostatin M receptor	31.943	9.335	6.082	1.82	2.122	-	0	0	-
	LIFR	Leukemia inhibitory factor receptor alpha	6.551	7.311	1.456	-	-	2.041	-	-	0.002
	CXCR4	C-X-C chemokine receptor type 4	7.207	45.699	3.124	-2.594	-	3.519	0	-	0
	CLCF1	Cardiotrophin-like cytokine factor 1	7.704	7.476	23.587	-	1.828	1.938	-	0.002	0
	IL7R	Interleukin 7 receptor	1.577	3.064	0.101	-	3.594	4.501	-	0	0
	FIGF	C-fos induced growth factor (vascular endothelial growth factor D)	15.25	30.773	6.373	-	-	1.93	-	-	0
	FLT1	Fms-related tyrosine kinase 1	10.997	19.043	4.416	-	-	1.804	-	-	0.004
	IL18RAP	Interleukin 18 receptor accessory protein	0.338	1.029	0.091	-	-	3.124	-	-	0.003
	IL1R1	Interleukin 1 receptor, type I	27.078	22.706	8.404	-	1.461	-	-	0.02	-
	IL12RB1	Interleukin 12 receptor, beta 1	0.344	1.171	0.273	-	-	1.847	-	-	0.046
	CCR8	Chemokine (C-C motif) receptor 8	0.887	2.361	0.303	-	-	2.689	-	-	0.003
	CCR5	Chemokine (C-C motif) receptor 5 (gene/pseudogene)	0.851	1.501	0.127	-	-	3.303	-	-	0.004
	CCR2	Chemokine (C-C motif) receptor 2	0.582	1.118	0.028	-	-	5.016	-	-	0.001
	CCR1	Chemokine (C-C motif) receptor 1	1.995	1.69	0.252	-	2.703	-	-	0.046	-
	CXCR6	Chemokine (C-X-C motif) receptor 6	0.499	1.676	0.169	-	-	2.919	-	-	0.005
	FASLG	Fas ligand (TNF superfamily, member 6)	0.358	1.352	0.144	-	-	2.912	-	-	0.007
	CXCL14	Chemokine (C-X-C motif) ligand 14	20.741	0.831	13.445	-	-	4.315	-	-	0
	KITLG	KIT ligand	6.695	8.982	2.409	-	-	1.604	-	-	0.019
	IL2RG	Interleukin 2 receptor, gamma	3.637	10.11	2.037	-1.402	-	2.009	0.025	-	0
	IL18	Interleukin 18	8.103	10.459	1.649	-	-	2.445	-	-	0
	IL13RA1	Interleukin 13 receptor, alpha 1	44.329	33.236	14.313	-	1.349	-	-	0.045	-
	TNFRSF1B	Tumor necrosis factor receptor superfamily, member 1B	15.132	22.681	6.001	-	-	1.624	-	-	0.003
	CXCR3	Chemokine (C-X-C motif) receptor 3	0.55	2.812	0.529	-2.349	-	2.148	0.006	-	0.01
	BMP7	Bone morphogenetic protein 7	10.633	9.715	1.078	-	-	3.011	-	-	0
	IL21R	Interleukin 21 receptor	0.136	1.157	0.283	-3.032	-	-	0.002	-	-
	IL2RB	Interleukin 2 receptor, beta	3.14	9.728	1.527	-1.601	-	2.36	0.007	-	0
	Novel00990		0.667	1.633	0.381	-1.2282	-	1.791	-	-	0.033
	TNFSF10	Tumor necrosis factor (ligand) superfamily, member 10	8.407	16.088	4.231	-	-	1.5915	-	-	0.0081132
Cell adhesion molecules (CAMs)
	ENSOARG00000000058	DQB1_HUMAN HLA class II histocompatibility antigen, DQ beta 1 chain	41.925	54.674	15.159	-	-	1.592	-	-	0.009
	ENSOARG00000001701	HA1B_BOVIN BOLA class I histocompatibility antigen, alpha chain	16.75	50.54	19.523	-1.562	-	-	0.005	-	-
	CD4	T-cell surface glycoprotein CD4 precursor	0.602	1.497	0.208	-	-	2.542	-	-	0.015
	ENSOARG00000007906	DMB_HUMAN HLA class II histocompatibility antigen, DM beta chain	3.427	5.195	1.506	-	-	1.495	-	-	0.009
	HLA-DOA	Major histocompatibility complex, class II, DO alpha	3.4	8.647	1.873	-	-	1.887	-	-	0.026
	ITGAM	Integrin alpha-M precursor	2.734	2.689	0.635	-	1.857	1.828	-	0.005	0.003
	ENSOARG00000009042	HA1B_BOVIN BOLA class I histocompatibility antigen, alpha chain BL3-7	1.252	4.284	1.486	-1.718	-	1.256	0.002	-	0.042
	ENSOARG00000009724	Uncharacterized protein	1.347	6.684	2.096	-2.2657	-	-	0.00091129	-	-
	SELE	E-selectin	0.681	0.021	1.087	5.052	-	-	0.002	-	-
	ENSOARG00000011738	ICOSL_HUMAN ICOS ligand	5.619	7.366	2.027	-	-	1.571	-	-	0.031
	ITGB2	Integrin, beta 2 (complement component 3 receptor 3 and 4 subunit)	9.211	14.835	4.283	-	-	1.532	-	-	0.006
	CD274	CD274 molecule	0.714	1.677	0.285	-	-	2.334	-	-	0
	ENSOARG00000014069	HA1B_BOVIN BOLA class I histocompatibility antigen, alpha chain BL3-7	10.59	32.14	9.856	-1.55	-	1.401	0.006	-	0.015
	CLDN15	Claudin 15	321.803	340.151	783.489	-	1.457	1.464	-	0.012	0.005
	ENSOARG00000015646	DRB4_HUMAN HLA class II histocompatibility antigen, DR beta 4 chain	106.615	162.097	33.781	-	1.416	1.971	-	0.029	0
	PTPRC	Protein tyrosine phosphatase, receptor type, C	4.78	12.454	1.736	-1.361	-	2.526	0.03	-	0
	CD6	CD6 molecule	1.273	4.996	0.65	-1.93	-	2.606	0.001	-	0
	ENSOARG00000016257	HA2D_PIG SLA class II histocompatibility antigen, DQ haplotype D alpha chain	5.776	10.268	1.911	-	1.421	2.216	-	0.029	0.032
	HLA-DRA	Major histocompatibility complex, class II, DR alpha	70.071	111.345	26.411	-	-	1.792	-	-	0
	ITGB7	Integrin, beta 7	3.22	6.698	1.834	-	-	1.591	-	-	0.007
	ITGA4	Integrin, alpha 4 (antigen CD49D, alpha 4 subunit of VLA-4 receptor)	1.02	1.888	0.286	-	-	2.473	-	-	0
	CNTN1	Contactin 1	14.543	4.162	6.012	1.828	-	-	0	-	-
	CD86	CD86 molecule	2.285	2.054	0.327	-	2.56	-	-	0.005	-
	CD2	CD2 molecule	0.612	2.971	0.447	-2.23	-	2.405	0	-	0
	CD8A	CD8a molecule	2.146	6.009	1.272	-	-	1.992	-	-	0.042
	CD8B	CD8b molecule	1.898	5.425	0.912	-	-	2.254	-	-	0.004
ECM-receptor interaction
	ITGB7	Integrin, beta 7	3.22	6.698	1.834	-	-	1.591	-	-	0.007
	ITGA4	Integrin, alpha 4 (antigen CD49D, alpha 4 subunit of VLA-4 receptor)	1.02	1.888	0.286	-	-	2.473	-	-	0
	TNXB	Tenascin XB	45.975	69.699	22.431	-	-	1.364	-	-	0.048
	COL1A1	Collagen, type I, alpha 1	479.479	344.554	772.944	-	-	1.453	-	-	0.008
	ITGA1	Integrin, alpha 1	8.184	14.559	2.678	-	-	2.153	-	-	0
	COL11A2	Collagen, type XI, alpha 2	0.816	2.149	2.723	-	2.004	-	-	0.027	-
	CD47	CD47 molecule	61.748	33.511	16.741	-	1.606	-	-	0.031	-
	ENSOARG00000017020	Uncharacterized protein	2.61	4.033	0.53	-	-	2.699	-	-	5.856e-05
