# Supplementary material for: Comparative transcriptome analysis reveals potentially novel roles of Homeobox genes in adipose deposition in fat-tailed sheep
Source: Sci Rep. 2017 Nov 3;7:14491. doi: 10.1038/s41598-017-14967-9 (PMC5670210; doi:10.1038/s41598-017-14967-9)
Supplement: Supplementary file 11 — Dataset 10 [file 41598_2017_14967_MOESM11_ESM.xlsx]

## Sheet: Supplementary Table S10
Supplementary Table S10. Primer sequences used for qPCR validation of twenty-four genes.
Gene_ID	Gene_Name	Forward primer (5’–3’)	Reverse primer (5’–3’)	Amplicon (bp)	Tm (°C)
ENSOARG00000014939	CLDN15(claudin 15)	TGTTCAGCCTCGGTCTCTTG	GCAGGTCCGTCAGAGGAATG	205	60
ENSOARG00000002307	DLK1(delta-like 1 homolog)	GACACCTCTGTGACCTAGAC	GCAATCCTTTCCCGAGAACC	128	60
ENSOARG00000016764	FRZB(frizzled-related protein)	AGCGCTCCAGATTACTGTTG	AGGCTTCTGACTCTGAGTTG	155	60
ENSOARG00000017214	NR4A1(nuclear receptor subfamily 4, group A, member 1)	CCGGACAGACAGCCTGAAAG	CCGAGAGCAGGTCGTAGAAC	224	60
ENSOARG00000003293	PDGFD(platelet derived growth factor D)	AAACTGTGGCTGTGGAACTG	ATGTCAACGAGAGCCATGTG	144	60
ENSOARG00000008046	RDH16(retinol dehydrogenase 16 (all-trans))	CCAATGTGACCAGCCCTAAG	AGCAGGTTGTCTCCAACAAG	141	60
ENSOARG00000014674	SCD1(acyl-CoA desaturase)	TCTATGACCCAACTTACCAG	GTAGGTTCGGTGACTCCA	224	60
ENSOARG00000001680	SFRP2(secreted frizzled-related protein 2)	GAGGAAGCTCCGAAGGTATG	TTCTCGGACACTCCGTTCAG	194	60
ENSOARG00000014623	TCF21(transcription factor 21)	AGCTACATCGCCCACTTGAG	TGGCGGTCACCACTTCTTTC	136	60
ENSOARG00000003021	ACTB(actin beta)	TCTGGCACCACACCTTCTAC	TCTTCTCACGGTTGGCCTTG	102	60
ENSOARG00000009758	HOXA6(homeobox A6)	CGTACACCTCACCTTGTTTC	CTGCTGTCGGGTTTGTACTG	196	60
ENSOARG00000009680	HOXA9(homeobox A9)	CGGCCTTATGGCATTAAACC	TTCTCCAGTTCCAGCGTTTG	287	60
ENSOARG00000009675	HOXA10(homeobox A10)	AAGGACTCCCTGGGCAATTC	AGTTTCATCCTGCGGTTCTG	227	60
ENSOARG00000007134	HOXB2(homeobox B2)	CCAAGAAACCCAGCCAATCC	CAGCTGCGTGTTGGTGTAAG	161	60
ENSOARG00000007034	HOXB5(homeobox B5)	AGTTCCCAGAGGACATCAAG	TCGGATTCTGTGCCCATTAC	136	60
ENSOARG00000006908	HOXB7(homeobox B7)	TCCCTGCCTACAAATCATCC	GGAAGCAAACGCACAAGAAG	137	60
ENSOARG00000016271	HOXC4(homeobox C4）	CAAGCAACCCATAGTCTACC	CCATTCTCGCTCGTAAATCC	99	60
ENSOARG00000016296	HOXC6(homeobox C6）	GGACCAGAAAGCCAGTATCC	GCGTTAGGTAGCGGTTGAAG	161	60
ENSOARG00000016306	HOXC8(homeobox C8）	AACAGTAGCGAAGGACAAGG	GATACCGGCTGTAAGTTTGC	118	60
ENSOARG00000016319	HOXC9(homeobox C9）	GCAAGCACAAAGAGGAGAAG	CATCCTCCGATTCTGAAACC	233	60
ENSOARG00000016331	HOXC10(homeobox C10）	CCAGTCCCAATGAGATCAAG	TTCCAGCGTCTGGTGTTTAG	206	60
ENSOARG00000016342	HOXC11(homeobox C11）	CAGCTACTCCTCCTGCTATG	GACGCTGTTCTTGTTGACTG	178	60
ENSOARG00000016352	HOXC12(homeobox C12）	GCTTGGTATCGCCTCTAAAC	CCTGCTGGTCACTAAGATTC	207	60
ENSOARG00000016363	HOXC13(homeobox C13）	CAAGGAGTTCGCCTTCTATC	TGTAGGGCACACGTTTCTTG	296	60
